# Supplementary material for: Insights into the Adaptation to High Altitudes from Transcriptome Profiling: A Case Study of an Endangered Species, Kingdonia uniflora
Source: Genes (Basel). 2023 Jun 19;14(6):1291. doi: 10.3390/genes14061291 (PMC10298588; doi:10.3390/genes14061291)
Supplement: Supplementary file 1 [file genes-14-01291-s001.zip]

Archive with 7 entries (7 files):
- Supplemental Figures.pdf
- Supplemental Table S1.xlsx
- Supplemental Table S2.xlsx
- Supplemental Table S3.xlsx
- Supplemental Table S4.xlsx
- Supplemental Table S5.xlsx
- Supplemental Table S6.xlsx
