# Supplementary material for: Insights into the Adaptation to High Altitudes from Transcriptome Profiling: A Case Study of an Endangered Species, Kingdonia uniflora
Source: Genes (Basel). 2023 Jun 19;14(6):1291. doi: 10.3390/genes14061291 (PMC10298588; doi:10.3390/genes14061291)
Supplement: Supplementary file 1 [file genes-14-01291-s001.zip › Supplemental Table S1.xlsx]

## Sheet: Sheet1
Sample	Raw Data		Valid Data		Valid Ratio(reads)	Q20%	Q30%	GC content%
	Read	Base	Read	Base
A_1	40303254	6.05G	39009474	5.85G	96.79	99.93	97.6	45
A_2	42115420	6.32G	40608392	6.09G	96.42	99.93	97.84	44
A_3	48259748	7.24G	46576634	6.99G	96.51	99.93	97.52	46.5
B_1	44215900	6.63G	43193668	6.48G	97.69	99.93	97.69	44
B_2	42151008	6.32G	41175840	6.18G	97.69	99.93	97.6	44.5
B_3	42934214	6.44G	41967506	6.30G	97.75	99.93	97.66	44.5
C_1	41134326	6.17G	39595038	5.94G	96.26	99.92	97.67	44.5
C_2	38456806	5.77G	37532128	5.63G	97.6	99.93	97.64	46.5
C_3	38849436	5.83G	37389550	5.61G	96.24	99.93	97.68	43.5
D_1	41004436	6.15G	39879986	5.98G	97.26	99.93	97.59	44.5
D_2	42643066	6.40G	41866606	6.28G	98.18	99.94	97.9	44.5
D_3	40066776	6.01G	39140222	5.87G	97.69	99.92	97.61	44.5
E_1	41576008	6.24G	40381048	6.06G	97.13	99.93	97.56	44.5
E_2	42731092	6.41G	41542494	6.23G	97.22	99.93	97.54	44.5
E_3	41109730	6.17G	39936106	5.99G	97.15	99.92	97.48	44.5
F_1	43028652	6.45G	41435940	6.22G	96.3	99.9	96.96	45
F_2	41948540	6.29G	40542604	6.08G	96.65	99.92	97.47	44.5
F_3	41433650	6.22G	40267530	6.04G	97.19	99.88	96.85	44.5
