# Supplementary material for: Insights into the Adaptation to High Altitudes from Transcriptome Profiling: A Case Study of an Endangered Species, Kingdonia uniflora
Source: Genes (Basel). 2023 Jun 19;14(6):1291. doi: 10.3390/genes14061291 (PMC10298588; doi:10.3390/genes14061291)
Supplement: Supplementary file 1 [file genes-14-01291-s001.zip › Supplemental Table S2.xlsx]

## Sheet: Sheet1
		The overall information of mapping reads in all samples
Sample	Valid reads	Mapped reads	Unique Mapped reads	Multi Mapped reads	PE Mapped reads	Reads map to sense strand	Reads map to antisense strand	Non-splice reads	Splice reads
A_1	39009474	35860378(91.93%)	29060403(74.50%)	6799975(17.43%)	34564824(88.61%)	14524323(37.23%)	14536080(37.26%)	17767572(45.55%)	11292831(28.95%)
A_2	40608392	38981287(95.99%)	33824441(83.29%)	5156846(12.70%)	37678956(92.79%)	16906155(41.63%)	16918286(41.66%)	21264246(52.36%)	12560195(30.93%)
A_3	46576634	40958325(87.94%)	28971263(62.20%)	11987062(25.74%)	39599276(85.02%)	14477359(31.08%)	14493904(31.12%)	17443692(37.45%)	11527571(24.75%)
B_1	43193668	39255680(90.88%)	36010834(83.37%)	3244846(7.51%)	37959788(87.88%)	17994451(41.66%)	18016383(41.71%)	21275624(49.26%)	14735210(34.11%)
B_2	41175840	38031314(92.36%)	34095195(82.80%)	3936119(9.56%)	36785904(89.34%)	17040656(41.39%)	17054539(41.42%)	20011849(48.60%)	14083346(34.20%)
B_3	41967506	37958811(90.45%)	34668879(82.61%)	3289932(7.84%)	36776566(87.63%)	17326208(41.28%)	17342671(41.32%)	20193098(48.12%)	14475781(34.49%)
C_1	39595038	38174065(96.41%)	32610457(82.36%)	5563608(14.05%)	36961762(93.35%)	16294104(41.15%)	16316353(41.21%)	18574421(46.91%)	14036036(35.45%)
C_2	37532128	36156713(96.34%)	25035918(66.71%)	11120795(29.63%)	35088998(93.49%)	12511815(33.34%)	12524103(33.37%)	14304128(38.11%)	10731790(28.59%)
C_3	37389550	35916195(96.06%)	31585105(84.48%)	4331090(11.58%)	34741444(92.92%)	15783581(42.21%)	15801524(42.26%)	18462147(49.38%)	13122958(35.10%)
D_1	39879986	36350022(91.15%)	30163769(75.64%)	6186253(15.51%)	34981526(87.72%)	15075761(37.80%)	15088008(37.83%)	19314665(48.43%)	10849104(27.20%)
D_2	41866606	40398959(96.49%)	36048838(86.10%)	4350121(10.39%)	39472576(94.28%)	18016304(43.03%)	18032534(43.07%)	20994412(50.15%)	15054426(35.96%)
D_3	39140222	36805281(94.03%)	32638938(83.39%)	4166343(10.64%)	35603072(90.96%)	16308020(41.67%)	16330918(41.72%)	19115155(48.84%)	13523783(34.55%)
E_1	40381048	38856690(96.23%)	32853928(81.36%)	6002762(14.87%)	37470058(92.79%)	16433542(40.70%)	16420386(40.66%)	20593429(51.00%)	12260499(30.36%)
E_2	41542494	39823600(95.86%)	34704489(83.54%)	5119111(12.32%)	38367280(92.36%)	17358342(41.78%)	17346147(41.76%)	22486441(54.13%)	12218048(29.41%)
E_3	39936106	38386798(96.12%)	33078825(82.83%)	5307973(13.29%)	37071734(92.83%)	16538878(41.41%)	16539947(41.42%)	20038170(50.18%)	13040655(32.65%)
F_1	41435940	39679610(95.76%)	31861815(76.89%)	7817795(18.87%)	38137612(92.04%)	15946416(38.48%)	15915399(38.41%)	19355636(46.71%)	12506179(30.18%)
F_2	40542604	37927484(93.55%)	31852214(78.56%)	6075270(14.98%)	36548042(90.15%)	15930042(39.29%)	15922172(39.27%)	19811133(48.86%)	12041081(29.70%)
F_3	40267530	38520063(95.66%)	32782498(81.41%)	5737565(14.25%)	36814124(91.42%)	16416581(40.77%)	16365917(40.64%)	20482104(50.87%)	12300394(30.55%)

## Sheet: Sheet2
		The interval distribution of mapped reads
Coverage	A_1	A_2	A_3	B_1	B_2	B_3	C_1	C_2	C_3	D_1	D_2
0-1	0.1187	0.123	0.121	0.1034	0.105	0.1072	0.1029	0.1024	0.1045	0.1145	0.1125
2-5	0.1742	0.1683	0.1837	0.1575	0.1576	0.1651	0.1511	0.1652	0.1568	0.1734	0.1602
6-10	0.1055	0.0997	0.1092	0.0914	0.0916	0.0945	0.094	0.1059	0.0907	0.1053	0.0934
11-15	0.0695	0.0647	0.0732	0.062	0.0614	0.0654	0.0633	0.0727	0.0656	0.0699	0.0627
16-20	0.0579	0.0535	0.0545	0.049	0.0497	0.0483	0.0513	0.0537	0.0493	0.0577	0.0481
21-25	0.0447	0.0451	0.0443	0.041	0.0382	0.0421	0.0415	0.0467	0.0405	0.0454	0.0385
26-30	0.0377	0.0391	0.0391	0.0344	0.037	0.0328	0.0376	0.0378	0.0372	0.0371	0.0311
>30	0.3916	0.4066	0.3749	0.4612	0.4595	0.4445	0.4582	0.4156	0.4553	0.3967	0.4535

## Sheet: Sheet3
					The gene region information of mapped reads in all samples
Samples	A_1	A_2	A_3	B_1	B_2	B_3	C_1	C_2	C_3	D_1	D_2	D_3	E_1	E_2	E_3	F_1	F_2	F_3
exon	88.34	85.69	88.14	90.84	91.06	92.25	89.55	87.74	87.76	88.48	92.03	91.9	89.48	90.64	90.33	89.34	88.86	89.6
intron	4.64	6.54	3.97	3.95	3.77	3.08	4.33	3.55	5.32	4.8	3.25	3.53	4.78	4.53	4.27	4.37	4.69	4.48
intergenic	7.01	7.77	7.9	5.21	5.17	4.67	6.12	8.72	6.91	6.72	4.72	4.57	5.74	4.83	5.41	6.29	6.45	5.91
