# Supplementary material for: Insights into the Adaptation to High Altitudes from Transcriptome Profiling: A Case Study of an Endangered Species, Kingdonia uniflora
Source: Genes (Basel). 2023 Jun 19;14(6):1291. doi: 10.3390/genes14061291 (PMC10298588; doi:10.3390/genes14061291)
Supplement: Supplementary file 1 [file genes-14-01291-s001.zip › Supplemental Table S3.xlsx]

## Sheet: Sheet1
		The statistics of gene expression information in all samples
Sample	Exp gene	Min.	1st Qu.	Median	Mean	3rd Qu.	Max.	Sd.	Sum.
A_1	24144	0	0.86	4.3	31.25	14.7	48398.5	431.88	754525
A_2	24420	0	0.77	4.18	30.23	13.91	40825.1	401.59	738269
A_3	23288	0	0.81	3.91	32.13	13.89	47425.9	414.41	748187
B_1	24367	0	0.91	4.88	28.86	18.11	106704	688.27	703138
B_2	24057	0	0.96	5.14	28.59	18.83	69793.5	459.6	687784
B_3	23493	0	0.85	4.5	28.59	18.01	77778.4	515.3	671700
C_1	24679	0	1.08	5.44	29.48	18.3	110248	707.78	727657
C_2	23789	0	1.28	5.85	30.18	19.77	82453.3	544.67	718035
C_3	25303	0	1.1	5.75	27.24	19.08	89504.5	568.08	689266
D_1	24141	0	0.86	4.19	32.18	13.92	50275.8	510.05	776953
D_2	23059	0	0.82	4.48	33.11	17.34	138611	921.34	763525
D_3	23576	0	0.86	4.54	30.32	17.83	101602	668.54	714733
E_1	25241	0	1.12	5.14	28.77	15.46	15756.4	232.19	726058
E_2	23849	0	0.62	3.11	30.05	12.34	14620.9	284.43	716649
E_3	25330	0	1.17	5.54	26.92	17.79	5185.29	119.03	681976
F_1	24418	0	0.97	4.61	29.17	15.4	19399.2	261.58	712231
F_2	25231	0	1.08	5.16	28.38	16.78	23152.7	232.93	716081
F_3	24713	0	0.83	3.98	28.99	13.32	19679	308.95	716348

## Sheet: Sheet2
	Gene expression interval distribution of all samples
Sample	0-0.1 FI	0.1-0.3 FI	0.3-3.57 FI	3.57-15 FI	15-60 FI	>60 FI
A_1	1209(5.01%)	2158(8.94%)	7837(32.46%)	7004(29.01%)	4322(17.90%)	1614(6.68%)
A_2	1529(6.26%)	2186(8.95%)	7787(31.89%)	7120(29.16%)	4344(17.79%)	1454(5.95%)
A_3	1242(5.33%)	1992(8.55%)	7999(34.35%)	6512(27.96%)	3911(16.79%)	1632(7.01%)
B_1	1383(5.68%)	1934(7.94%)	7496(30.76%)	6659(27.33%)	4766(19.56%)	2129(8.74%)
B_2	1335(5.55%)	1901(7.90%)	7265(30.20%)	6520(27.10%)	4888(20.32%)	2148(8.93%)
B_3	1363(5.80%)	1935(8.24%)	7463(31.77%)	6123(26.06%)	4514(19.21%)	2095(8.92%)
C_1	1247(5.05%)	1836(7.44%)	7352(29.79%)	7088(28.72%)	5088(20.62%)	2068(8.38%)
C_2	886(3.72%)	1595(6.70%)	7297(30.67%)	6768(28.45%)	5068(21.30%)	2175(9.14%)
C_3	1229(4.86%)	1865(7.37%)	7433(29.38%)	7200(28.46%)	5506(21.76%)	2070(8.18%)
D_1	1303(5.40%)	2051(8.50%)	7981(33.06%)	7111(29.46%)	4173(17.29%)	1522(6.30%)
D_2	1483(6.43%)	1868(8.10%)	7261(31.49%)	6056(26.26%)	4418(19.16%)	1973(8.56%)
D_3	1354(5.74%)	1976(8.38%)	7415(31.45%)	6166(26.15%)	4554(19.32%)	2111(8.95%)
E_1	1247(4.94%)	1755(6.95%)	7771(30.79%)	7985(31.64%)	4724(18.72%)	1759(6.97%)
E_2	1624(6.81%)	2293(9.61%)	8610(36.10%)	6077(25.48%)	3604(15.11%)	1641(6.88%)
E_3	1198(4.73%)	1860(7.34%)	7483(29.54%)	7646(30.19%)	5060(19.98%)	2083(8.22%)
F_1	1221(5.00%)	1893(7.75%)	7956(32.58%)	7101(29.08%)	4414(18.08%)	1833(7.51%)
F_2	1135(4.50%)	1966(7.79%)	7651(30.32%)	7608(30.15%)	4999(19.81%)	1872(7.42%)
F_3	1402(5.67%)	2065(8.36%)	8353(33.80%)	7244(29.31%)	4142(16.76%)	1507(6.10%)
