# Supplementary material for: Insights into the Adaptation to High Altitudes from Transcriptome Profiling: A Case Study of an Endangered Species, Kingdonia uniflora
Source: Genes (Basel). 2023 Jun 19;14(6):1291. doi: 10.3390/genes14061291 (PMC10298588; doi:10.3390/genes14061291)
Supplement: Supplementary file 1 [file genes-14-01291-s001.zip › Supplemental Table S4.xlsx]

## Sheet: Sheet1
gene_id	chr	start	end	strand	gene_name	EntrezID	transcript_id	GO	KEGG	KO_ENTRY	EC	Description	trans_type	FPKM.A_1	FPKM.A_2	FPKM.A_3	FPKM.B_1	FPKM.B_2	FPKM.B_3	FPKM.C_1	FPKM.C_2	FPKM.C_3	FPKM.D_1	FPKM.D_2	FPKM.D_3	FPKM.E_1	FPKM.E_2	FPKM.E_3	FPKM.F_1	FPKM.F_2	FPKM.F_3	count.A_1	count.A_2	count.A_3	count.B_1	count.B_2	count.B_3	count.C_1	count.C_2	count.C_3	count.D_1	count.D_2	count.D_3	count.E_1	count.E_2	count.E_3	count.F_1	count.F_2	count.F_3
gene-GIB67_000001	JACGCM010002717.1	8378	10408	+	GIB67_000001	40788	rna-gnl|WGS:JACGCM|KingUnif38286.1	GO:0003924(GTPase activity);GO:0005198(structural molecule activity);GO:0005200(structural constituent of cytoskeleton);GO:0005525(GTP binding);GO:0005737(cytoplasm);GO:0005773(vacuole);GO:0005874(microtubule);GO:0007017(microtubule-based process);GO:0009416(response to light stimulus);GO:0009826(unidimensional cell growth)	04145(Phagosome)	K07375	NA	Tubulin [Macleaya cordata]	NA	5.25487	3.07383	5.81905	1.8566	2.13003	1.63454	5.65261	8.66107	4.4822	13.423	3.22764	2.71629	35.7343	14.3926	29.6809	33.8535	20.598	5.71777	294	191	324	126	138	110	345	402	254	792	223	171	2259	979	1847	1982	1217	361
gene-GIB67_000002	JACGCM010002717.1	14061	14420	+	GIB67_000002	40790	rna-gnl|WGS:JACGCM|KingUnif03027.1	GO:0003924(GTPase activity);GO:0005200(structural constituent of cytoskeleton);GO:0005515(protein binding);GO:0005525(GTP binding);GO:0005737(cytoplasm);GO:0005794(Golgi apparatus);GO:0005874(microtubule);GO:0007017(microtubule-based process);GO:0009651(response to salt stress);GO:0016020(membrane);GO:0045298(tubulin complex)	04145(Phagosome)	K07375	NA	PREDICTED: tubulin beta chain-like [Erythranthe guttata]	NA	1.76277	0.920229	1.73813	3.50761	3.7636	2.7347	8.23856	5.39286	10.5931	2.01239	6.51163	13.2223	36.9731	18.5235	61.3532	32.8411	31.9841	25.3964	35	21	35	85	86	65	178	89	212	42	159	294	827	446	1350	680	668	567
gene-GIB67_000003	JACGCM010002717.1	16098	17802	-	GIB67_000003	40791	rna-gnl|WGS:JACGCM|KingUnif33468.1	NA	NA	NA	NA	PREDICTED: proline-rich protein 4-like [Nelumbo nucifera]	NA	14.1689	4.12258	8.27757	1.87455	2.7325	3.78448	3.73618	6.57952	3.70687	21.9599	0.079691	0.091847	8.96454	0.175483	13.6198	0.458021	0.102829	0.744961	1259	407	731	203	281	402	362	485	333	2056	9	10	900	19	1346	43	10	75
gene-GIB67_000004	JACGCM010002717.1	12078	13781	-	GIB67_000004	40789	rna-gnl|WGS:JACGCM|KingUnif16807.1	NA	NA	NA	NA	PREDICTED: proline-rich protein 4-like [Nelumbo nucifera]	NA	11.4289	3.13565	5.61402	1.69302	1.50018	2.61091	2.82722	4.61376	3.9128	21.952	0.097911	0.014776	10.3332	0.098681	11.9383	0.474386	0.158687	0.843633	1015	309	496	183	154	277	274	340	352	2054	11	2	1037	11	1179	45	15	85
gene-GIB67_000005	JACGCM010002717.1	5759	6277	-	GIB67_000005	40787	rna-gnl|WGS:JACGCM|KingUnif40393.1	GO:0003755(peptidyl-prolyl cis-trans isomerase activity)	NA	NA	NA	cyclophilin 2 [Tagetes patula]	NA	13.6637	10.3377	8.12949	6.96869	6.9766	6.14821	18.6023	28.7198	25.0954	20.5241	38.0817	24.0587	35.1642	8.34763	29.241	22.7588	30.5815	12.24	390	327	231	242	230	210	579	680	724	617	1340	769	1134	290	928	680	921	394
gene-GIB67_000006	JACGCM010002717.1	3301	3818	-	GIB67_000006	40786	rna-gnl|WGS:JACGCM|KingUnif27103.1	GO:0003755(peptidyl-prolyl cis-trans isomerase activity)	NA	NA	NA	ABH-like cyclophilin [Eschscholzia californica]	NA	147.271	137.902	110.372	325.685	213.586	272.682	686.416	568.593	418.589	144.547	536.649	404.923	202.129	120.791	266.943	348.456	592.96	155.123	3568	3707	2656	9572	5973	7886	18133	11431	10250	3691	16043	10994	5534	3558	7195	8837	15168	4242
gene-GIB67_000007	JACGCM010001326.1	17907	27824	+	GIB67_000007	20610	rna-gnl|WGS:JACGCM|KingUnif39345.1	GO:0005783(endoplasmic reticulum);GO:0005789(endoplasmic reticulum membrane);GO:0005886(plasma membrane);GO:0016021(integral component of membrane);GO:0080167(response to karrikin)	NA	NA	NA	hypothetical protein AQUCO_02600324v1 [Aquilegia coerulea]	NA	22.8377	19.8818	24.7793	16.5276	18.4521	15.3177	46.7819	59.6422	32.186	39.0833	25.0796	26.9912	30.2624	30.3753	25.9027	51.3207	50.5513	38.2585	1836	1773	1979	1612	1712	1470	4100	3978	2615	3310	2488	2432	2749	2968	2316	4318	4290	3471
gene-GIB67_000008	JACGCM010001326.1	2976	4091	+	GIB67_000008	20608	rna-gnl|WGS:JACGCM|KingUnif29691.1	GO:0005634(nucleus)	NA	NA	NA	hypothetical protein VITISV_003292 [Vitis vinifera]	NA	2.39864	2.60587	4.28414	11.1542	10.2666	12.849	7.87583	7.76307	5.99915	2.53299	14.1752	13.2525	13.0396	11.54	15.8833	10.0563	11.1554	5.09364	148	178	261	830	727	941	527	395	372	164	1073	911	904	861	1084	646	723	353
gene-GIB67_000009	JACGCM010001326.1	5179	5432	+	GIB67_000009	20609	rna-gnl|WGS:JACGCM|KingUnif03803.1	NA	NA	NA	NA		NA	0	0	0	0	0.302932	0	0.373589	0	0	0	0	0	0	0.173257	0	0.435151	0	0	0	0	0	0	5	0	6	0	0	0	0	0	0	3	0	6	0	0
gene-GIB67_000011	JACGCM010001326.1	20629	21051	-	GIB67_000011	20611	rna-gnl|WGS:JACGCM|KingUnif38601.1	NA	NA	NA	NA		NA	0	0	0	0	0	0	0.388348	0	0.090207	0	0	0	0	0	0.044177	0.184642	1.02105	0	0	0	0	0	0	0	9	0	2	0	0	0	0	0	2	5	23	0
gene-GIB67_000014	JACGCM010001326.1	213533	214325	+	GIB67_000014	20618	rna-gnl|WGS:JACGCM|KingUnif05963.1	NA	NA	NA	NA		NA	0.071669	0	0.198982	0.053292	0.11907	0	0	0	0	0	0	0	0	0	0	0	0	0	3	0	8	3	5	0	0	0	0	0	0	0	0	0	0	0	0	0
gene-GIB67_000016	JACGCM010001326.1	189751	192447	-	GIB67_000016	20615	rna-gnl|WGS:JACGCM|KingUnif15258.1	GO:0016021(integral component of membrane)	03010(Ribosome)	K02882	NA	hypothetical protein AQUCO_01100128v1 [Aquilegia coerulea]	NA	0.595224	0.5395	0.582815	0.268008	0.451497	0.257009	1.00739	0.88265	0.682107	0.160467	0	0	0.144737	0.109948	0.258387	1.0288	0.678914	0.517761	32	32	31	18	28	17	59	39	37	9	0	0	9	8	16	58	39	32
gene-GIB67_000019	JACGCM010001326.1	602803	603933	-	GIB67_000019	20620	rna-gnl|WGS:JACGCM|KingUnif16551.1	GO:0005739(mitochondrion);GO:0008150(biological_process);GO:0016020(membrane);GO:0043231(intracellular membrane-bounded organelle)	NA	NA	NA	hypothetical protein AQUCO_00500380v1 [Aquilegia coerulea]	NA	2.26918	1.49497	2.21326	2.67986	2.78605	2.07829	6.4463	5.06019	4.90195	2.60122	8.12202	2.9526	22.5663	5.3402	28.9715	7.17115	8.65574	3.42924	141	104	137	202	200	155	437	261	308	171	623	206	1585	404	2003	467	568	241
gene-GIB67_000020	JACGCM010001326.1	742615	746818	+	GIB67_000020	20624	rna-gnl|WGS:JACGCM|KingUnif13137.1	GO:0005506(iron ion binding);GO:0009507(chloroplast);GO:0009941(chloroplast envelope);GO:0010291(carotene beta-ring hydroxylase activity);GO:0016117(carotenoid biosynthetic process);GO:0016123(xanthophyll biosynthetic process);GO:0016705(oxidoreductase activity, acting on paired donors, with incorporation or reduction of molecular oxygen);GO:0019825(oxygen binding);GO:0020037(heme binding);GO:005…	00906(Carotenoid biosynthesis)	K15747	EC:1.14.-.-	PREDICTED: protein LUTEIN DEFICIENT 5, chloroplastic-like isoform X1 [Nelumbo nucifera]	NA	2.02366	4.48289	0.809644	3.0276	2.134	1.41782	4.551	1.76436	9.9036	2.69671	1.50176	0.876126	1.60069	0.418035	2.89928	2.74506	5.15486	2.48955	138	338	55	250	168	115	337	100	680	193	126	67	123	35	219	195	370	191
gene-GIB67_000021	JACGCM010001326.1	698630	699282	+	GIB67_000021	20621	rna-gnl|WGS:JACGCM|KingUnif30613.1	NA	NA	NA	NA	PREDICTED: B3 domain-containing protein At3g19184 isoform X1 [Theobroma cacao]	NA	0	0	0	0	0	0	0	0	0	0	0	0	0	0	0	0	0.045689	0.040067	0	0	0	0	0	0	0	0	0	0	0	0	0	0	0	0	2	2
gene-GIB67_000022	JACGCM010001326.1	739398	740756	+	GIB67_000022	20623	rna-gnl|WGS:JACGCM|KingUnif11163.1	NA	NA	NA	NA	PREDICTED: F-box protein At4g09920 [Nelumbo nucifera]	NA	1.10324	4.64991	1.17046	1.69572	0.381251	0.67948	2.48914	0.956359	6.06797	1.81952	0.830572	0.432248	1.66587	0.479599	1.17801	2.92838	3.67414	5.54873	59	272	62	109	24	43	143	42	323	101	54	26	99	31	69	162	204	330
gene-GIB67_000023	JACGCM010001326.1	700487	703828	-	GIB67_000023	20622	rna-gnl|WGS:JACGCM|KingUnif27017.1	NA	NA	NA	NA	PREDICTED: uncharacterized protein LOC107881990 [Prunus mume]	NA	0	0	0	0	0	0	0	0	0	0	0	0.048487	0	0	0	0	0	0	0	0	0	0	0	0	0	0	0	0	0	2	0	0	0	0	0	0
gene-GIB67_000024	JACGCM010001326.1	781817	782595	+	GIB67_000024	20625	rna-gnl|WGS:JACGCM|KingUnif34615.1	NA	NA	NA	NA	B3 DNA binding domain [Macleaya cordata]	NA	0	0	0	0	0	0	0	0	0	0	0	0	0.220907	0	0	0	0	0	0	0	0	0	0	0	0	0	0	0	0	0	11	0	0	0	0	0
gene-GIB67_000027	JACGCM010001326.1	948058	949286	+	GIB67_000027	20629	rna-gnl|WGS:JACGCM|KingUnif28522.1	GO:0004185(serine-type carboxypeptidase activity);GO:0016747(transferase activity, transferring acyl groups other than amino-acyl groups);GO:0019748(secondary metabolic process);GO:0051603(proteolysis involved in cellular protein catabolic process)	NA	NA	NA	serine carboxypeptidase-like 2 [Quercus suber]	NA	0.091288	0	0	0.050643	0.113205	0	0	0	0.116854	0.041057	0	0	0.153134	0	0.120565	0	0.192996	0.14182	3	0	0	2	5	0	0	0	4	2	0	0	6	0	5	0	7	5
gene-GIB67_000028	JACGCM010001326.1	937835	945139	-	GIB67_000028	20628	rna-gnl|WGS:JACGCM|KingUnif17737.1	GO:0003779(actin binding);GO:0005829(cytosol);GO:0005886(plasma membrane);GO:0007010(cytoskeleton organization);GO:0007163(establishment or maintenance of cell polarity);GO:0007165(signal transduction);GO:0008154(actin polymerization or depolymerization);GO:0008179(adenylate cyclase binding);GO:0009826(unidimensional cell growth);GO:0030036(actin cytoskeleton organization);GO:0030864(cortical act…	NA	NA	NA	cyclase-associated protein 1 [Solanum lycopersicum]	NA	0.941891	1.93921	1.78348	1.8863	1.53111	1.06424	1.68906	1.65314	2.78334	2.21289	1.55323	1.17284	1.38015	1.15039	1.25723	0.901297	1.30167	0.985308	96	220	181	234	181	130	188	140	287	238	196	134	159	143	143	97	141	114
gene-GIB67_000029	JACGCM010001326.1	980500	984785	-	GIB67_000029	20631	rna-gnl|WGS:JACGCM|KingUnif06541.1	GO:0004616(phosphogluconate dehydrogenase (decarboxylating) activity);GO:0005739(mitochondrion);GO:0009507(chloroplast);GO:0009570(chloroplast stroma);GO:0016616(oxidoreductase activity, acting on the CH-OH group of donors, NAD or NADP as acceptor);GO:0030267(glyoxylate reductase (NADP) activity)	00630(Glyoxylate and dicarboxylate metabolism);00650(Butanoate metabolism)	K18121	EC:1.1.1.79;EC:1.1.1.-	hypothetical protein DCAR_007628 [Daucus carota subsp. sativus]	NA	0	0	0	0	0	0	0	0	0.083712	0	0	0	0	0	0	0.062478	0	0.195766	0	0	0	0	0	0	0	0	4	0	0	0	0	0	0	3	0	9
gene-GIB67_000031	JACGCM010001326.1	1016129	1016782	-	GIB67_000031	20633	rna-gnl|WGS:JACGCM|KingUnif42559.1	GO:0003674(molecular_function);GO:0005739(mitochondrion);GO:0008150(biological_process)	NA	NA	NA	PREDICTED: putative pentatricopeptide repeat-containing protein At1g10330 [Nelumbo nucifera]	NA	0.456849	0.279342	0.459945	2.81939	2.94473	2.12755	2.1959	1.72862	3.14077	0.618083	4.75144	0.860345	2.60582	1.60049	2.51111	1.57208	1.63443	1.07909	17	12	17	123	123	92	87	52	115	24	211	35	106	70	101	60	63	44
gene-GIB67_000034	JACGCM010001326.1	1089526	1097181	+	GIB67_000034	20635	rna-gnl|WGS:JACGCM|KingUnif15012.1	GO:0005887(integral component of plasma membrane);GO:0015179(L-amino acid transmembrane transporter activity);GO:0015297(antiporter activity)	NA	NA	NA	hypothetical protein AQUCO_00400618v1 [Aquilegia coerulea]	NA	31.2802	17.7749	39.414	262.398	116.659	213.683	50.9119	63.3736	39.8617	22.3095	19.0278	114.072	5.70779	2.91136	5.09623	9.88318	8.69642	9.62091	4114	2594	5149	41864	17708	33545	7302	6916	5299	3092	3088	16813	849	466	746	1361	1208	1429
gene-GIB67_000035	JACGCM010001326.1	1139832	1141802	-	GIB67_000035	20638	rna-gnl|WGS:JACGCM|KingUnif39654.1	GO:0005739(mitochondrion);GO:0008150(biological_process)	NA	NA	NA	Pentatricopeptide repeat [Macleaya cordata]	NA	0.217838	0.065493	0.243737	0.46085	0.550323	0.249242	0.402143	1.06583	0.664102	0.14175	0.607859	0.538969	0.843718	0.367681	1.02716	0.330932	0.700352	0.308961	24	8	27	61	69	33	48	96	73	17	82	66	104	49	124	38	81	38
gene-GIB67_000036	JACGCM010001326.1	1097511	1105152	-	GIB67_000036	20636	rna-gnl|WGS:JACGCM|KingUnif05847.1	GO:0003689(DNA clamp loader activity);GO:0005663(DNA replication factor C complex);GO:0006261(DNA-dependent DNA replication)	03030(DNA replication);03420(Nucleotide excision repair);03430(Mismatch repair)	K10756	NA	hypothetical protein AQUCO_00400616v1 [Aquilegia coerulea]	NA	12.8834	11.4082	12.26	10.0469	15.1013	11.208	19.6452	21.3994	18.6356	17.8818	26.3778	14.9753	28.3953	23.8185	40.4489	25.3731	28.5008	21.0373	942	925	890	891	1274	978	1566	1298	1377	1377	2379	1227	2345	2116	3288	1941	2199	1735
gene-GIB67_000038	JACGCM010001326.1	1130834	1134670	-	GIB67_000038	20637	rna-gnl|WGS:JACGCM|KingUnif20891.1	NA	NA	NA	NA		NA	0.221439	0.450655	0	5.44982	1.16582	1.94788	1.99661	0.86818	1.32358	0.384493	0.833029	1.1683	1.17525	0.309803	0.764076	1.64946	1.13014	0.146494	7	14	0	183	38	65	61	20	37	12	29	37	37	11	24	48	33	5
gene-GIB67_000040	JACGCM010000297.1	41147	42301	+	GIB67_000040	3060	rna-gnl|WGS:JACGCM|KingUnif13240.1	GO:0005739(mitochondrion);GO:0005777(peroxisome);GO:0016208(AMP binding)	NA	NA	NA	hypothetical protein AQUCO_01500408v1 [Aquilegia coerulea]	NA	1.96148	1.21647	1.79485	0	0	0	1.13403	3.09358	1.34793	2.75951	0.075474	0	0	0.084589	0.073374	0.535205	0.12907	0	73	51	67	0	0	0	46	96	51	108	4	0	0	4	4	21	6	0
gene-GIB67_000041	JACGCM010000297.1	52040	53324	-	GIB67_000041	3061	rna-gnl|WGS:JACGCM|KingUnif04376.1	GO:0005509(calcium ion binding);GO:0005515(protein binding);GO:0009507(chloroplast);GO:0009535(chloroplast thylakoid membrane);GO:0009543(chloroplast thylakoid lumen);GO:0009570(chloroplast stroma);GO:0009579(thylakoid);GO:0009654(photosystem II oxygen evolving complex);GO:0016020(membrane);GO:0019898(extrinsic component of membrane);GO:0030095(chloroplast photosystem II);GO:0031977(thylakoid lum…	NA	NA	NA	PREDICTED: psbP domain-containing protein 1, chloroplastic isoform X1 [Nelumbo nucifera]	NA	7.61724	4.01773	4.39426	12.0534	21.9677	18.3111	11.5221	7.65948	8.1685	7.55534	6.83228	5.74333	6.7726	6.05483	15.0229	8.05535	7.82861	3.44763	258	151	148	495	857	739	425	215	279	269	285	218	259	249	565	285	280	132
gene-GIB67_000043	JACGCM010002785.1	6012	6757	-	GIB67_000043	41734	rna-gnl|WGS:JACGCM|KingUnif30879.1	GO:0004565(beta-galactosidase activity);GO:0005618(cell wall);GO:0005773(vacuole)	00052(Galactose metabolism);00600(Sphingolipid metabolism);00531(Glycosaminoglycan degradation);00604(Glycosphingolipid biosynthesis - ganglio series);00511(Other glycan degradation)	K12309	EC:3.2.1.23	PREDICTED: beta-galactosidase 1-like isoform X1 [Gossypium arboreum]	NA	2.54905	3.29128	1.88508	2.67395	6.1943	2.00135	4.71164	1.65376	4.58429	3.57653	4.6153	0.851161	1.05007	1.28511	6.00208	3.08114	6.89274	2.18074	61	87	45	77	169	57	122	33	110	89	135	23	28	37	158	77	172	59
gene-GIB67_000044	JACGCM010002766.1	6634	20708	+	GIB67_000044	41137	rna-gnl|WGS:JACGCM|KingUnif16779.1	GO:0005737(cytoplasm);GO:0006537(glutamate biosynthetic process);GO:0015930(glutamate synthase activity);GO:0019676(ammonia assimilation cycle)	00910(Nitrogen metabolism);00250(Alanine, aspartate and glutamate metabolism)	K00264	EC:1.4.1.13;EC:1.4.1.14	Class II glutamine amidotransferase domain [Macleaya cordata]	NA	16.2525	8.0523	13.131	22.217	19.0991	28.2634	20.6142	24.0304	34.9783	35.2405	70.7828	71.02	17.213	27.9908	12.1184	14.3936	32.8007	55.1617	5949	3270	4774	9866	8069	12349	8228	7299	12941	13593	31970	29133	7121	12456	4935	5515	12677	22791
gene-GIB67_000045	JACGCM010002766.1	43523	46444	+	GIB67_000045	41139	rna-gnl|WGS:JACGCM|KingUnif03238.1	GO:0004842(ubiquitin-protein transferase activity);GO:0019005(SCF ubiquitin ligase complex);GO:0031146(SCF-dependent proteasomal ubiquitin-dependent protein catabolic process)	NA	NA	NA	hypothetical protein AQUCO_09600035v1 [Aquilegia coerulea]	NA	3.32572	4.47183	3.61075	6.09706	4.29999	3.90611	3.93602	4.38623	5.57506	4.24642	4.87631	3.87342	5.80682	7.25728	4.26335	4.21923	4.80835	5.8105	250	373	270	556	373	351	323	274	424	337	452	326	493	663	357	332	382	493
gene-GIB67_000046	JACGCM010002766.1	5351	6179	+	GIB67_000046	41136	rna-gnl|WGS:JACGCM|KingUnif30829.1	GO:0005737(cytoplasm);GO:0006537(glutamate biosynthetic process);GO:0015930(glutamate synthase activity);GO:0019676(ammonia assimilation cycle)	00910(Nitrogen metabolism);00250(Alanine, aspartate and glutamate metabolism)	K00264	EC:1.4.1.13;EC:1.4.1.14	PREDICTED: glutamate synthase 1 [NADH], chloroplastic isoform X1 [Populus euphratica]	NA	0.430575	0	0	0	0	1.01121	0	0	0	0	0	0	0	0.964935	0.474271	0	0	0	9	0	0	0	0	24	0	0	0	0	0	0	0	23	11	0	0	0
gene-GIB67_000047	JACGCM010002766.1	22004	27034	-	GIB67_000047	41138	rna-gnl|WGS:JACGCM|KingUnif21392.1	GO:0003841(1-acylglycerol-3-phosphate O-acyltransferase activity);GO:0005739(mitochondrion);GO:0008152(metabolic process);GO:0016021(integral component of membrane);GO:0016024(CDP-diacylglycerol biosynthetic process);GO:0016746(transferase activity, transferring acyl groups)	00561(Glycerolipid metabolism);00564(Glycerophospholipid metabolism)	K13513	EC:2.3.1.-;EC:2.3.1.51	PREDICTED: probable 1-acyl-sn-glycerol-3-phosphate acyltransferase 5 [Nelumbo nucifera]	NA	9.75556	9.20739	14.3512	3.26627	11.49	13.0032	16.2271	13.8271	7.99856	10.7386	4.25901	12.8424	0.676307	7.20461	5.18912	8.9526	10.6777	2.30529	914	957	1336	372	1243	1454	1658	1075	758	1060	493	1349	72	821	541	878	1056	244
gene-GIB67_000048	JACGCM010002023.1	15500	16799	+	GIB67_000048	31253	rna-gnl|WGS:JACGCM|KingUnif20917.1	GO:0005768(endosome);GO:0005774(vacuolar membrane);GO:0005802(trans-Golgi network);GO:0008757(S-adenosylmethionine-dependent methyltransferase activity);GO:0032259(methylation)	NA	NA	NA	putative S-adenosyl-L-methionine-dependent methyltransferase [Macleaya cordata]	NA	2.35903	2.37809	2.119	3.57043	1.57105	1.58399	6.62579	3.79828	6.97044	2.2855	0.571399	1.05833	5.83448	1.06475	2.06853	3.94752	5.81024	2.95689	131	147	117	241	101	105	401	175	391	134	40	66	366	72	128	230	341	186
gene-GIB67_000049	JACGCM010002023.1	23710	25631	-	GIB67_000049	31254	rna-gnl|WGS:JACGCM|KingUnif38612.1	GO:0005524(ATP binding);GO:0005739(mitochondrion);GO:0005886(plasma membrane);GO:0007005(mitochondrion organization);GO:0016887(ATPase activity)	NA	NA	NA	AAA+ ATPase domain [Macleaya cordata]	NA	0.170252	0.414633	0	1.24802	0.544183	0.45576	0.65874	0.209428	0.411935	0	0.107847	0	1.24446	0.103449	0.367491	0	0.034016	0.062298	10	25	0	81	34	29	39	10	23	0	8	0	75	7	22	0	2	4
gene-GIB67_000050	JACGCM010002023.1	29458	36495	-	GIB67_000050	31256	rna-gnl|WGS:JACGCM|KingUnif13550.1	GO:0005315(inorganic phosphate transmembrane transporter activity);GO:0005351(carbohydrate:proton symporter activity);GO:0005576(extracellular region);GO:0005886(plasma membrane);GO:0005887(integral component of plasma membrane);GO:0006817(phosphate ion transport);GO:0015114(phosphate ion transmembrane transporter activity);GO:0015144(carbohydrate transmembrane transporter activity);GO:0015293(sy…	NA	NA	NA	hypothetical protein DVH24_001852 [Malus domestica]	NA	8.17358	8.66618	5.75925	8.35496	6.64276	5.562	0	4.85989	2.55487	8.44874	6.32443	7.56234	5.73173	2.76637	4.42527	0	0	2.4695	420	494	294	521	394	342	0	208	133	458	401	436	333	173	253	0	0	144
gene-GIB67_000051	JACGCM010002023.1	27189	27644	-	GIB67_000051	31255	rna-gnl|WGS:JACGCM|KingUnif06497.1	NA	NA	NA	NA	hypothetical protein CISIN_1g006458mg [Citrus sinensis]	NA	0.298915	0	0	0.594729	0.190638	0.123525	1.54146	0.3575	0	0	0	0	0.369765	0	0	0	0	0	6	0	0	13	4	3	30	6	0	0	0	0	8	0	0	0	0	0
gene-GIB67_000052	JACGCM010000905.1	9309	10894	+	GIB67_000052	12392	rna-gnl|WGS:JACGCM|KingUnif00376.1	GO:0005739(mitochondrion);GO:0008150(biological_process);GO:0008270(zinc ion binding)	NA	NA	NA	Ribonuclease T2-like [Macleaya cordata]	NA	0	0	0.042057	0.060807	0	0	0.065466	0	0.051531	0	0.097814	0.069243	0.063987	0	0	0	0.104169	0.009369	0	0	3	4	0	0	4	0	3	0	7	4	4	0	0	0	6	1
gene-GIB67_000053	JACGCM010000905.1	6856	8150	-	GIB67_000053	12391	rna-gnl|WGS:JACGCM|KingUnif02948.1	GO:0004322(ferroxidase activity);GO:0005739(mitochondrion);GO:0006783(heme biosynthetic process);GO:0006811(ion transport);GO:0006879(cellular iron ion homeostasis);GO:0006979(response to oxidative stress);GO:0007005(mitochondrion organization);GO:0008198(ferrous iron binding);GO:0008199(ferric iron binding);GO:0009060(aerobic respiration);GO:0009507(chloroplast);GO:0018283(iron incorporation int…	00860(Porphyrin and chlorophyll metabolism)	K19054	EC:1.16.3.1	Frataxin/CyaY [Macleaya cordata]	NA	13.4062	17.1842	16.8598	16.8708	15.1086	20.9909	18.2035	23.3604	17.9415	25.6022	15.8064	17.2211	15.5754	14.9023	13.0508	17.3554	21.2533	14.3172	422	601	528	645	549	789	625	611	571	850	614	608	555	571	457	572	707	509
gene-GIB67_000054	JACGCM010001565.1	47471	52352	+	GIB67_000054	23914	rna-gnl|WGS:JACGCM|KingUnif36657.1	GO:0005794(Golgi apparatus);GO:0035252(UDP-xylosyltransferase activity);GO:0042546(cell wall biogenesis)	NA	NA	NA	PREDICTED: UDP-D-xylose:L-fucose alpha-1,3-D-xylosyltransferase MGP4-like [Nelumbo nucifera]	NA	2.17944	2.25706	3.38122	4.53321	5.04542	3.37735	3.1602	3.56485	3.67065	2.5962	4.30631	3.26878	5.59923	2.43586	7.16751	7.07887	4.45127	4.65401	316	363	487	797	843	584	499	429	538	397	770	531	916	429	1155	1073	681	761
gene-GIB67_000055	JACGCM010001565.1	4947	8342	+	GIB67_000055	23910	rna-gnl|WGS:JACGCM|KingUnif42076.1	GO:0004674(protein serine/threonine kinase activity);GO:0005886(plasma membrane);GO:0006468(protein phosphorylation)	NA	NA	NA	Protein kinase domain [Macleaya cordata]	NA	3.82939	3.32799	4.4489	3.80767	1.99931	2.29486	1.52315	0.903641	1.01692	1.7975	0.182951	0.638659	1.09954	1.26678	0.512003	0.597347	2.43925	0.389796	606	584	699	730	365	433	263	119	163	300	36	114	197	244	90	99	407	70
gene-GIB67_000056	JACGCM010001565.1	41811	46306	+	GIB67_000056	23913	rna-gnl|WGS:JACGCM|KingUnif38391.1	GO:0005515(protein binding);GO:0005737(cytoplasm);GO:0005856(cytoskeleton);GO:0010090(trichome morphogenesis);GO:0031209(SCAR complex);GO:0045010(actin nucleation)	NA	NA	NA	hypothetical protein BVC80_8925g3 [Macleaya cordata]	NA	5.31758	3.47326	2.7287	3.68484	9.00829	8.33397	5.74303	4.0249	4.48119	4.32589	7.23795	5.42407	5.5075	2.84686	14.5233	7.98473	6.33773	3.00793	305	221	156	257	596	570	359	192	260	262	512	349	357	199	926	479	384	195
gene-GIB67_000057	JACGCM010001565.1	35026	40487	+	GIB67_000057	23912	rna-gnl|WGS:JACGCM|KingUnif02482.1	GO:0003674(molecular_function);GO:0008150(biological_process);GO:0009507(chloroplast)	NA	NA	NA	uncharacterized protein LOC113322580 [Papaver somniferum]	NA	12.6666	10.1802	16.0246	25.6076	21.2346	19.7983	27.3566	17.6253	23.3016	2.62401	2.62747	10.0528	8.33823	1.01679	6.1374	3.82858	5.89215	2.32488	1107	987	1391	2714	2141	2065	2606	1278	2058	242	284	985	824	108	597	351	544	230
gene-GIB67_000058	JACGCM010001565.1	2628	3557	+	GIB67_000058	23909	rna-gnl|WGS:JACGCM|KingUnif15475.1	GO:0005783(endoplasmic reticulum);GO:0005789(endoplasmic reticulum membrane);GO:0016021(integral component of membrane);GO:0016491(oxidoreductase activity);GO:0030148(sphingolipid biosynthetic process);GO:0046872(metal ion binding);GO:0052631(sphingolipid delta-8 desaturase activity);GO:0055114(oxidation-reduction process);GO:0070417(cellular response to cold)	NA	NA	NA	Cytochrome b5-like heme/steroid binding domain [Macleaya cordata]	NA	40.7571	16.7088	13.1035	11.3317	3.77961	10.1865	18.1598	27.3023	19.6985	73.6999	22.3888	10.3668	44.5613	36.4345	72.4746	64.4677	43.4478	54.1561	2083	947	665	703	223	622	1012	1158	1018	3968	1412	594	2573	2263	4119	3448	2344	3124
gene-GIB67_000059	JACGCM010001565.1	52995	58715	-	GIB67_000059	23915	rna-gnl|WGS:JACGCM|KingUnif20925.1	GO:0004683(calmodulin-dependent protein kinase activity);GO:0005516(calmodulin binding);GO:0005634(nucleus);GO:0005737(cytoplasm);GO:0009738(abscisic acid-activated signaling pathway);GO:0009931(calcium-dependent protein serine/threonine kinase activity);GO:0018105(peptidyl-serine phosphorylation);GO:0035556(intracellular signal transduction);GO:0046777(protein autophosphorylation)	04626(Plant-pathogen interaction)	K13412	EC:2.7.11.1	PREDICTED: calcium-dependent protein kinase 1-like [Nelumbo nucifera]	NA	32.0315	28.1955	39.135	29.106	26.9868	27.5544	52.1335	51.2372	40.988	32.5805	33.7628	36.423	25.6291	30.5454	26.845	38.6907	40.6669	30.1699	3606	3521	4376	3975	3506	3703	6399	4786	4664	3865	4690	4595	3261	4180	3362	4559	4834	3834
gene-GIB67_000060	JACGCM010001565.1	31573	34291	-	GIB67_000060	23911	rna-gnl|WGS:JACGCM|KingUnif02863.1	GO:0003677(DNA binding);GO:0005634(nucleus);GO:0008150(biological_process);GO:0009506(plasmodesma);GO:0046983(protein dimerization activity)	03010(Ribosome)	K02995	NA	uncharacterized protein LOC102664360 [Glycine max]	NA	0.292633	0.699886	0.308058	0.094389	0.047891	0.046226	0.319195	0.265534	0.598963	0.462824	0.124637	0.053748	0.20129	0.198609	0.133372	0.174046	0.284901	0.260674	38	100	40	15	8	8	45	29	78	63	20	8	30	31	19	24	39	38
gene-GIB67_000062	JACGCM010000462.1	12731	20840	+	GIB67_000062	5504	rna-gnl|WGS:JACGCM|KingUnif29744.1	GO:0000045(autophagosome assembly);GO:0000422(autophagy of mitochondrion);GO:0005829(cytosol);GO:0006497(protein lipidation);GO:0019898(extrinsic component of membrane);GO:0032266(phosphatidylinositol-3-phosphate binding);GO:0034045(phagophore assembly site membrane);GO:0034497(protein localization to phagophore assembly site);GO:0044804(autophagy of nucleus);GO:0080025(phosphatidylinositol-3,5-b…	NA	NA	NA	PREDICTED: autophagy-related protein 18c-like isoform X1 [Nelumbo nucifera]	NA	3.0279	2.86753	3.06615	3.50744	3.53589	2.03732	3.83178	4.07861	3.56703	1.9508	3.19368	2.63102	1.89992	0.754162	1.96666	3.21854	2.25319	2.04277	631	663	634	886	850	507	870	705	751	428	821	614	447	191	456	702	496	480
gene-GIB67_000063	JACGCM010000462.1	19839	20812	-	GIB67_000063	5505	rna-gnl|WGS:JACGCM|KingUnif37705.1	GO:0003674(molecular_function);GO:0005575(cellular_component);GO:0008150(biological_process)	NA	NA	NA	uncharacterized protein LOC113749525 [Coffea eugenioides]	NA	0.513385	0.184382	0.089111	0.548606	0.150955	0.04411	0.252532	0.51856	0.246913	2.88267	8.40573	3.32106	0	0.149014	0.10226	0.130501	0.098392	0.052614	26	11	5	33	9	3	14	22	13	151	513	185	0	9	6	7	6	3
gene-GIB67_000064	JACGCM010000462.1	21475	24019	-	GIB67_000064	5506	rna-gnl|WGS:JACGCM|KingUnif41564.1	GO:0005789(endoplasmic reticulum membrane);GO:0009672(auxin:proton symporter activity);GO:0009733(response to auxin);GO:0009734(auxin-activated signaling pathway);GO:0009926(auxin polar transport);GO:0016021(integral component of membrane);GO:0055085(transmembrane transport)	NA	NA	NA	hypothetical protein AQUCO_01600442v1 [Aquilegia coerulea]	NA	0.11077	0.07956	0	0	0.043835	0	0	0	0	0.061548	0.172766	0.172028	0.11271	0.013841	0.480144	0	0.032085	0	7	6	0	0	4	0	0	0	0	4	13	12	8	2	32	0	3	0
gene-GIB67_000067	JACGCM010001725.1	73188	74304	+	GIB67_000067	26268	rna-gnl|WGS:JACGCM|KingUnif31316.1	NA	NA	NA	NA		NA	0	0.715773	0.196796	0	2.69939	2.30321	0	0.661324	1.71105	0	0.987653	0	0	0.185844	0	0.504634	0.142658	0.089166	0	31	8	0	122	108	0	22	68	0	48	0	0	9	0	21	6	4
gene-GIB67_000069	JACGCM010001725.1	224427	225688	+	GIB67_000069	26269	rna-gnl|WGS:JACGCM|KingUnif35998.1	NA	NA	NA	NA	hypothetical protein AQUCO_00100849v1 [Aquilegia coerulea]	NA	0	0	0	0	0	0	0	0	0	0	0	0	0	0	0	0.11786	0	0.214633	0	0	0	0	0	0	0	0	0	0	0	0	0	0	0	4	0	8
gene-GIB67_000075	JACGCM010001725.1	466819	470109	+	GIB67_000075	26276	rna-gnl|WGS:JACGCM|KingUnif05092.1	GO:0004672(protein kinase activity);GO:0004674(protein serine/threonine kinase activity);GO:0005515(protein binding);GO:0005524(ATP binding);GO:0005622(intracellular);GO:0005634(nucleus);GO:0006468(protein phosphorylation);GO:0009615(response to virus);GO:0016032(viral process);GO:0016301(kinase activity);GO:0018105(peptidyl-serine phosphorylation);GO:0018107(peptidyl-threonine phosphorylation);G…	NA	NA	NA	PREDICTED: LOW QUALITY PROTEIN: serine/threonine-protein kinase GRIK1 [Nelumbo nucifera]	NA	0.092462	0	0	0	0	0	0	0	0.093307	0.101783	0	0	0	0.201163	0.061091	0	0	0	3	0	0	0	0	0	0	0	3	4	0	0	0	8	2	0	0	0
gene-GIB67_000076	JACGCM010001725.1	394789	394980	-	GIB67_000076	26275	rna-gnl|WGS:JACGCM|KingUnif02128.1	GO:0004842(ubiquitin-protein transferase activity);GO:0005515(protein binding);GO:0005634(nucleus);GO:0006511(ubiquitin-dependent protein catabolic process);GO:0016567(protein ubiquitination)	04141(Protein processing in endoplasmic reticulum);04120(Ubiquitin mediated proteolysis)	K03094	NA	PREDICTED: SKP1-like protein 1B [Eucalyptus grandis]	NA	0	0	0	0	0	0	0	0	0	0	0	0.216576	0	0	0	0	0	0	0	0	0	0	0	0	0	0	0	0	0	3	0	0	0	0	0	0
gene-GIB67_000077	JACGCM010001725.1	496583	498270	+	GIB67_000077	26278	rna-gnl|WGS:JACGCM|KingUnif26718.1	NA	NA	NA	NA	protein MAIN-LIKE 2-like [Papaver somniferum]	NA	0	0	0	0	0	0	0	0	0	0	0	0.04712	0	0	0	0	0	0	0	0	0	0	0	0	0	0	0	0	0	4	0	0	0	0	0	0
gene-GIB67_000079	JACGCM010001725.1	488967	492866	-	GIB67_000079	26277	rna-gnl|WGS:JACGCM|KingUnif12596.1	GO:0005634(nucleus)	NA	NA	NA	F-box domain [Macleaya cordata]	NA	6.47032	12.8183	5.27226	14.6394	17.3444	13.1925	5.22156	7.72735	6.96363	7.00134	6.92951	31.2014	25.3441	29.3894	29.7181	2.85826	6.39002	4.28778	711	1562	576	1951	2199	1730	626	705	773	811	939	3840	3146	3924	3631	329	741	532
gene-GIB67_000082	JACGCM010001302.1	12715	16206	-	GIB67_000082	20456	rna-gnl|WGS:JACGCM|KingUnif27092.1	GO:0004364(glutathione transferase activity);GO:0005737(cytoplasm);GO:0006749(glutathione metabolic process);GO:0010731(protein glutathionylation)	00480(Glutathione metabolism)	K00799	EC:2.5.1.18	Glutathione S-transferase [Macleaya cordata]	NA	34.7651	15.4928	16.7199	42.8822	18.2727	5.572	116.139	180.121	86.367	66.8887	40.3883	90.0642	77.4037	110.919	64.5732	377.528	485.563	106.354	2015	997	963	3015	1223	386	7340	8663	5060	4086	2889	5850	5070	7816	4164	22903	29714	6958
gene-GIB67_000083	JACGCM010001302.1	6848	11329	-	GIB67_000083	20455	rna-gnl|WGS:JACGCM|KingUnif42566.1	GO:0004364(glutathione transferase activity);GO:0005737(cytoplasm);GO:0006749(glutathione metabolic process);GO:0010731(protein glutathionylation)	00480(Glutathione metabolism)	K00799	EC:2.5.1.18	Glutathione S-transferase [Macleaya cordata]	NA	27.1095	24.2881	31.8143	69.6559	64.3787	46.416	86.5775	61.5113	85.3096	25.0333	33.4055	54.8015	16.8277	14.6464	7.43809	25.0219	62.1313	14.584	1296	1288	1511	4039	3552	2648	4512	2440	4122	1261	1971	2936	909	852	396	1252	3136	787
gene-GIB67_000084	JACGCM010002730.1	8961	9335	+	GIB67_000084	40831	rna-gnl|WGS:JACGCM|KingUnif13152.1	GO:0003674(molecular_function);GO:0005739(mitochondrion);GO:0008150(biological_process);GO:0016021(integral component of membrane)	00230(Purine metabolism);00240(Pyrimidine metabolism);03020(RNA polymerase)	K03010	EC:2.7.7.6	hypothetical protein AQUCO_00700055v1 [Aquilegia coerulea]	NA	1.39544	2.269	1.22765	2.22349	0	0.356241	4.046	4.42651	2.56522	5.1311	1.41203	1.09097	0.166662	0.525457	0.421821	2.38307	2.14059	1.52241	29	52	26	56	0	9	91	76	54	112	36	26	4	14	10	52	47	36
gene-GIB67_000085	JACGCM010001752.1	33494	78827	+	GIB67_000085	26932	rna-gnl|WGS:JACGCM|KingUnif30242.1	GO:0003674(molecular_function);GO:0005575(cellular_component);GO:0008150(biological_process)	00280(Valine, leucine and isoleucine degradation)	K00020	EC:1.1.1.31	hypothetical protein AQUCO_09100047v1 [Aquilegia coerulea]	NA	8.64662	14.4404	8.16815	56.3519	26.2479	27.7507	57.5217	35.324	69.049	10.1729	90.8244	103.39	7.42168	5.87436	10.3118	11.6935	21.8478	21.135	1936	3586	1816	15300	6781	7414	14038	6560	15620	2400	25082	25932	1878	1599	2568	2740	5163	5340
gene-GIB67_000086	JACGCM010001752.1	79168	80011	-	GIB67_000086	26935	rna-gnl|WGS:JACGCM|KingUnif37140.1	GO:0005730(nucleolus);GO:0043565(sequence-specific DNA binding);GO:2000014(regulation of endosperm development)	NA	NA	NA	HMG-Y-related protein A-like [Arachis duranensis]	NA	6.91276	7.14959	14.0046	29.3167	43.5063	36.3163	69.6517	43.7359	35.697	9.25843	40.6094	21.6509	203.344	34.9789	266.094	102.967	93.4615	32.0819	294	337	591	1511	2133	1841	3226	1542	1533	415	2128	1031	9759	1806	12570	4577	4191	1538
gene-GIB67_000087	JACGCM010001752.1	74563	75825	-	GIB67_000087	26934	rna-gnl|WGS:JACGCM|KingUnif05952.1	GO:0004674(protein serine/threonine kinase activity);GO:0005515(protein binding);GO:0005524(ATP binding);GO:0005622(intracellular);GO:0005886(plasma membrane);GO:0016301(kinase activity);GO:0018105(peptidyl-serine phosphorylation);GO:0018107(peptidyl-threonine phosphorylation);GO:0035556(intracellular signal transduction)	NA	NA	NA	PREDICTED: CBL-interacting serine/threonine-protein kinase 12-like [Cucumis sativus]	NA	0.027096	0.477942	0	0.192787	0.083251	0.047976	0	0	0.550415	0	0.198256	0.428694	0.041832	0.045682	0	0	0.199115	0	2	37	0	17	7	4	0	0	39	0	17	34	4	4	0	0	15	0
gene-GIB67_000088	JACGCM010001752.1	47389	47854	-	GIB67_000088	26933	rna-gnl|WGS:JACGCM|KingUnif03928.1	NA	NA	NA	NA		NA	0	0	0	0	0	0	0.367831	0	0.738703	0	0.058898	0	0.191716	0	0	0	0.129872	0	0	0	0	0	0	0	8	0	15	0	2	0	5	0	0	0	3	0
gene-GIB67_000089	JACGCM010001752.1	154992	167850	+	GIB67_000089	26939	rna-gnl|WGS:JACGCM|KingUnif11571.1	GO:0004073(aspartate-semialdehyde dehydrogenase activity);GO:0005739(mitochondrion);GO:0006520(cellular amino acid metabolic process);GO:0009507(chloroplast);GO:0009536(plastid);GO:0009570(chloroplast stroma);GO:0016620(oxidoreductase activity, acting on the aldehyde or oxo group of donors, NAD or NADP as acceptor)	00260(Glycine, serine and threonine metabolism);00270(Cysteine and methionine metabolism);00300(Lysine biosynthesis);00261(Monobactam biosynthesis)	K00133	EC:1.2.1.11	Semialdehyde dehydrogenase [Macleaya cordata]	NA	1.14969	0.798988	2.03958	4.83969	5.95802	5.36379	5.80616	3.15203	3.48365	1.34671	5.1418	4.12899	7.18213	3.83756	10.2842	2.81453	7.53301	3.79216	154	119	271	784	918	855	846	350	471	190	847	618	1084	623	1528	394	1062	572
gene-GIB67_000091	JACGCM010001752.1	150553	152879	-	GIB67_000091	26938	rna-gnl|WGS:JACGCM|KingUnif27592.1	GO:0005730(nucleolus);GO:0043565(sequence-specific DNA binding);GO:2000014(regulation of endosperm development)	NA	NA	NA	High mobility group [Macleaya cordata]	NA	10.7642	9.28746	7.12662	6.05415	8.10074	5.87605	11.6137	15.6871	17.81	11.0169	8.5047	5.29465	13.2334	9.84831	14.4502	19.2211	13.6006	15.0317	1329	1272	874	907	1154	866	1563	1607	2222	1433	1295	733	1846	1478	1984	2483	1772	2094
gene-GIB67_000092	JACGCM010001752.1	168475	185919	-	GIB67_000092	26940	rna-gnl|WGS:JACGCM|KingUnif24553.1	GO:0000111(nucleotide-excision repair factor 2 complex);GO:0003684(damaged DNA binding);GO:0003697(single-stranded DNA binding);GO:0005737(cytoplasm);GO:0006289(nucleotide-excision repair);GO:0006298(mismatch repair);GO:0071942(XPC complex)	03420(Nucleotide excision repair)	K10838	NA	Transglutaminase-like [Macleaya cordata]	NA	8.87841	10.9649	7.69779	12.6263	14.5451	12.1291	15.3009	12.3573	17.8837	13.082	9.59525	11.3894	13.0636	7.72503	14.123	15.0399	14.011	15.8656	1454	1992	1252	2508	2749	2371	2732	1679	2960	2257	1939	2090	2417	1538	2572	2578	2422	2932
gene-GIB67_000094	JACGCM010001752.1	230771	234370	+	GIB67_000094	26944	rna-gnl|WGS:JACGCM|KingUnif19209.1	GO:0004553(hydrolase activity, hydrolyzing O-glycosyl compounds);GO:0005576(extracellular region);GO:0008810(cellulase activity);GO:0009507(chloroplast);GO:0030245(cellulose catabolic process);GO:0042547(cell wall modification involved in multidimensional cell growth)	00500(Starch and sucrose metabolism)	K01179	EC:3.2.1.4	PREDICTED: endoglucanase 8-like [Nelumbo nucifera]	NA	0.254802	0.346347	0.171955	0	0.130526	0	0.149101	0	0	0.161348	0.074861	0	5.08606	0	12.3455	0.434435	0.043597	0.10724	22	34	15	0	13	0	14	0	0	15	8	0	495	0	1182	40	4	11
gene-GIB67_000095	JACGCM010001752.1	222143	230508	+	GIB67_000095	26943	rna-gnl|WGS:JACGCM|KingUnif11354.1	GO:0003676(nucleic acid binding);GO:0003729(mRNA binding);GO:0005654(nucleoplasm);GO:0005730(nucleolus);GO:0006952(defense response);GO:0051028(mRNA transport)	03040(Spliceosome);03013(RNA transport);03015(mRNA surveillance pathway)	K12881	NA	hypothetical protein AQUCO_09100046v1 [Aquilegia coerulea]	NA	56.862	51.5458	45.9496	40.7579	33.5718	27.0968	47.3759	62.1411	46.5421	68.4467	37.0485	40.0405	52.423	39.1585	33.2236	42.1765	55.6995	34.8514	3515	3534	2821	3056	2395	1999	3193	3187	2908	4458	2826	2774	3662	2943	2285	2729	3635	2432
gene-GIB67_000097	JACGCM010001752.1	272917	273838	+	GIB67_000097	26945	rna-gnl|WGS:JACGCM|KingUnif25655.1	NA	NA	NA	NA	putative Ty1-copia-like protein retrotransposon [Cinnamomum micranthum f. kanehirae]	NA	0.126107	0	0	0	0	0	0.218096	0	0	0.056831	0	0	0	0	0	0	0	0	6	0	0	0	0	0	12	0	0	3	0	0	0	0	0	0	0	0
gene-GIB67_000099	JACGCM010001752.1	312940	324832	+	GIB67_000099	26946	rna-gnl|WGS:JACGCM|KingUnif03625.1	GO:0004806(triglyceride lipase activity);GO:0005516(calmodulin binding);GO:0005886(plasma membrane);GO:0006629(lipid metabolic process)	NA	NA	NA	uncharacterized protein LOC21409812 [Morus notabilis]	NA	3.03629	3.72549	2.72953	4.40819	5.86503	4.20253	3.43856	3.45097	5.05094	3.13458	4.29969	2.99041	6.15899	3.80211	7.25743	9.41935	9.45991	5.69557	273	372	244	481	608	451	337	258	459	297	477	302	626	416	726	886	898	578
gene-GIB67_000101	JACGCM010001752.1	325987	327429	-	GIB67_000101	26947	rna-gnl|WGS:JACGCM|KingUnif26683.1	GO:0003674(molecular_function);GO:0005737(cytoplasm);GO:0005886(plasma membrane);GO:0006979(response to oxidative stress);GO:0016021(integral component of membrane)	NA	NA	NA	protein PLANT CADMIUM RESISTANCE 2-like [Sesamum indicum]	NA	93.8238	91.5711	149.352	71.9205	85.3793	75.318	194.361	219.022	186.11	98.0069	128.991	133.994	30.4168	63.7249	52.1238	30.357	37.5144	60.9381	4464	4833	7058	4151	4688	4278	10083	8647	8950	4914	7573	7144	1636	3686	2759	1512	1885	3273
gene-GIB67_000104	JACGCM010001752.1	454222	462035	+	GIB67_000104	26953	rna-gnl|WGS:JACGCM|KingUnif16105.1	GO:0003777(microtubule motor activity);GO:0005737(cytoplasm);GO:0005875(microtubule associated complex);GO:0007017(microtubule-based process);GO:0060271(cilium assembly)	NA	NA	NA	Dynein light chain, cytoplasmic [Vitis vinifera]	NA	5.80058	3.079	4.90926	3.43934	3.7729	4.48076	5.86175	7.50328	6.55968	8.923	10.2114	2.91297	12.2612	4.61076	15.86	11.3527	19.1445	9.34125	272	160	228	196	204	251	299	292	310	440	590	153	648	263	825	556	945	493
gene-GIB67_000107	JACGCM010001752.1	474737	478048	-	GIB67_000107	26956	rna-gnl|WGS:JACGCM|KingUnif13608.1	GO:0004553(hydrolase activity, hydrolyzing O-glycosyl compounds);GO:0030247(polysaccharide binding);GO:0046658(anchored component of plasma membrane)	00500(Starch and sucrose metabolism)	K19891	EC:3.2.1.39	hypothetical protein AQUCO_09100065v1 [Aquilegia coerulea]	NA	0.665231	0.332058	0	0.079655	0.058438	0	0.709684	0.617437	0.233232	0.515431	0.343992	0.042245	39.4407	1.19358	41.0959	4.53622	3.46869	4.35689	55	31	0	8	6	0	64	43	20	45	35	4	3666	120	3760	391	302	405
gene-GIB67_000108	JACGCM010001752.1	379683	381423	-	GIB67_000108	26951	rna-gnl|WGS:JACGCM|KingUnif24759.1	GO:0003674(molecular_function);GO:0005737(cytoplasm);GO:0005886(plasma membrane);GO:0006979(response to oxidative stress);GO:0016021(integral component of membrane)	NA	NA	NA	Protein PLANT CADMIUM RESISTANCE 2 isoform A [Glycine soja]	NA	263.701	222.841	407.275	112.204	148.489	147.054	480.191	458.809	401.25	255.67	311.284	349.052	166.781	370.416	183.5	75.5136	132.959	259.419	14081	13200	21601	7269	9152	9373	27960	20329	21656	14386	20510	20888	10065	24047	10900	4221	7497	15636
gene-GIB67_000110	JACGCM010001752.1	575709	576278	+	GIB67_000110	26962	rna-gnl|WGS:JACGCM|KingUnif10262.1	GO:0005739(mitochondrion);GO:0005794(Golgi apparatus);GO:0070588(calcium ion transmembrane transport)	NA	NA	NA	PREDICTED: calcium load-activated calcium channel-like [Nelumbo nucifera]	NA	24.95	24.8722	32.8871	34.4264	41.2114	30.7331	46.6448	48.2108	37.1097	34.7408	45.7496	51.0414	36.5645	35.2473	50.9251	47.7096	46.0377	38.108	782	864	1023	1308	1490	1149	1593	1253	1175	1147	1768	1792	1294	1342	1774	1564	1523	1347
gene-GIB67_000113	JACGCM010001752.1	503459	505376	-	GIB67_000113	26957	rna-gnl|WGS:JACGCM|KingUnif00397.1	GO:0003674(molecular_function);GO:0005634(nucleus);GO:0008150(biological_process)	NA	NA	NA	hypothetical protein BVC80_7819g5 [Macleaya cordata]	NA	3.28858	2.42402	1.57876	6.43929	6.42986	6.73468	3.22242	3.09585	3.99125	1.76696	6.51965	6.06498	6.03059	3.18597	8.96501	3.25949	3.5837	4.31782	187	153	90	445	422	458	200	147	230	106	458	387	388	221	568	194	216	278
gene-GIB67_000114	JACGCM010001752.1	510696	518578	-	GIB67_000114	26958	rna-gnl|WGS:JACGCM|KingUnif30534.1	NA	NA	NA	NA	PREDICTED: uncharacterized protein LOC100258393 isoform X2 [Vitis vinifera]	NA	1.64132	1.72369	1.53064	2.86028	3.29254	4.18127	2.68396	2.80143	2.39161	1.21306	5.35675	3.07085	3.35325	1.40198	4.49948	1.50522	1.62765	2.29414	117	136	108	246	270	354	208	165	172	91	469	244	269	121	355	112	122	184
gene-GIB67_000117	JACGCM010001752.1	612352	614664	-	GIB67_000117	26966	rna-gnl|WGS:JACGCM|KingUnif25169.1	GO:0005576(extracellular region);GO:0009505(plant-type cell wall);GO:0009506(plasmodesma);GO:0016042(lipid catabolic process);GO:0016788(hydrolase activity, acting on ester bonds);GO:0052689(carboxylic ester hydrolase activity)	00901(Indole alkaloid biosynthesis)	K21026	EC:3.1.1.80	GDSL esterase/lipase-like protein [Cinnamomum micranthum f. kanehirae]	NA	0.346244	0.426354	0	2.83415	3.75236	5.52592	0.584229	0.307361	1.22444	0.473749	3.4818	16.1366	1.29899	0.416858	3.41422	0.133434	0.161421	0.071712	38	52	0	376	473	721	70	28	136	55	470	1975	161	56	415	16	19	9
gene-GIB67_000118	JACGCM010001752.1	671383	684105	-	GIB67_000118	26970	rna-gnl|WGS:JACGCM|KingUnif02342.1	GO:0005737(cytoplasm);GO:0030001(metal ion transport);GO:0046914(transition metal ion binding);GO:0046916(cellular transition metal ion homeostasis)	NA	NA	NA	hypothetical protein VITISV_013840 [Vitis vinifera]	NA	0	0	0	0	0	0	0	0	0	0.099037	0	0	0	0	0	0	0	0	0	0	0	0	0	0	0	0	0	6	0	0	0	0	0	0	0	0
gene-GIB67_000120	JACGCM010001752.1	583953	595958	-	GIB67_000120	26963	rna-gnl|WGS:JACGCM|KingUnif07817.1	GO:0005575(cellular_component);GO:0006952(defense response);GO:0016788(hydrolase activity, acting on ester bonds);GO:0019863(IgE binding)	00901(Indole alkaloid biosynthesis)	K21026	EC:3.1.1.80	GDSL esterase/lipase-like protein [Cinnamomum micranthum f. kanehirae]	NA	0.183397	0.367196	0.067031	0	0	0	0.085759	0	0.276857	0.247273	0.01071	0	0.09828	0.052524	0.110996	0.14514	0.198727	0.128696	25	54	9	0	0	0	13	0	37	35	2	0	15	9	17	21	28	20
gene-GIB67_000124	JACGCM010002047.1	25335	27367	+	GIB67_000124	31527	rna-gnl|WGS:JACGCM|KingUnif28262.1	GO:0003924(GTPase activity);GO:0005198(structural molecule activity);GO:0005200(structural constituent of cytoskeleton);GO:0005525(GTP binding);GO:0005737(cytoplasm);GO:0005773(vacuole);GO:0005874(microtubule);GO:0007017(microtubule-based process);GO:0009416(response to light stimulus);GO:0009826(unidimensional cell growth)	04145(Phagosome)	K07375	NA	beta tubulin1 [Zea mays]	NA	0.240072	0.309712	0.496755	1.98866	2.08493	2.74586	4.62941	2.46601	5.22903	0.690621	5.05546	9.47927	18.1825	11.4998	32.9993	11.225	7.93338	17.7468	11	15	22	105	105	143	220	89	230	32	271	462	892	607	1594	510	364	870
gene-GIB67_000125	JACGCM010002047.1	17424	18295	+	GIB67_000125	31524	rna-gnl|WGS:JACGCM|KingUnif08647.1	GO:0009507(chloroplast);GO:0016740(transferase activity);GO:0016747(transferase activity, transferring acyl groups other than amino-acyl groups)	00942(Anthocyanin biosynthesis)	K21383	EC:2.3.1.215	hypothetical protein AQUCO_00800031v1 [Aquilegia coerulea]	NA	0	0	0	0	0	0	0	0	0	0	0	0	0.047128	0	0	0	0.033579	0	0	0	0	0	0	0	0	0	0	0	0	0	3	0	0	0	2	0
gene-GIB67_000126	JACGCM010002047.1	20230	20748	-	GIB67_000126	31525	rna-gnl|WGS:JACGCM|KingUnif40425.1	GO:0003755(peptidyl-prolyl cis-trans isomerase activity)	NA	NA	NA	ABH-like cyclophilin [Eschscholzia californica]	NA	314.32	302.668	252.031	728.326	509.195	617.019	1555.46	1393.95	995.876	313.156	1315.91	891.553	498.971	272.919	632.785	768.755	1282.41	376.129	8962	9573	7138	25191	16756	20999	48359	32979	28699	9409	46295	28487	16078	9460	20070	22943	38605	12105
gene-GIB67_000127	JACGCM010002047.1	22720	23238	-	GIB67_000127	31526	rna-gnl|WGS:JACGCM|KingUnif12082.1	GO:0003755(peptidyl-prolyl cis-trans isomerase activity)	NA	NA	NA	cyclophilin 2 [Tagetes patula]	NA	16.1107	12.1089	9.81625	7.64006	8.10268	6.41893	20.9532	33.6349	27.9305	23.8526	41.2812	25.3937	40.5128	8.68081	33.777	27.1886	36.3679	14.0288	460	383	278	265	267	219	652	796	805	717	1453	812	1306	301	1072	812	1095	452
gene-GIB67_000128	JACGCM010002047.1	518	5051	-	GIB67_000128	31521	rna-gnl|WGS:JACGCM|KingUnif24730.1	GO:0005634(nucleus);GO:0005737(cytoplasm)	00260(Glycine, serine and threonine metabolism);00350(Tyrosine metabolism);00360(Phenylalanine metabolism);00410(beta-Alanine metabolism);00950(Isoquinoline alkaloid biosynthesis);00960(Tropane, piperidine and pyridine alkaloid biosynthesis)	K00276	EC:1.4.3.21	uncharacterized protein LOC110418155 [Herrania umbratica]	NA	1.05626	0.985001	0.329473	1.39567	1.70757	1.19264	1.44434	3.24032	3.87057	1.39751	3.12973	3.62838	0.134431	0.156665	0.167956	0.082333	0.278749	0.20034	110	114	34	176	205	148	164	279	406	153	401	422	16	20	20	9	31	24
gene-GIB67_000129	JACGCM010002047.1	8450	9205	-	GIB67_000129	31522	rna-gnl|WGS:JACGCM|KingUnif09961.1	GO:0003674(molecular_function);GO:0003723(RNA binding);GO:0005575(cellular_component);GO:0008150(biological_process)	NA	NA	NA	Pentatricopeptide repeat [Macleaya cordata]	NA	0.066886	0	0.234014	0.28307	0.193904	0.27904	0.359513	0.625238	0.34033	0.188843	0.91642	0.727713	1.33635	0.195416	1.30987	0.335595	0.464407	0.032524	3	0	10	15	10	14	17	22	15	9	47	34	63	10	61	15	21	2
gene-GIB67_000130	JACGCM010002047.1	9220	9807	-	GIB67_000130	31523	rna-gnl|WGS:JACGCM|KingUnif41465.1	GO:0003674(molecular_function);GO:0003723(RNA binding);GO:0005575(cellular_component);GO:0008150(biological_process)	NA	NA	NA	hypothetical protein COLO4_17296 [Corchorus olitorius]	NA	0.04513	0	0.03823	0.188131	0.136987	0.28079	0.059845	0	0.346016	0.207999	0.332015	0.176578	0.364771	0.151993	0.46506	0.120678	0	0.088254	2	0	2	8	6	11	3	0	12	8	14	7	14	6	17	5	0	4
gene-GIB67_000135	JACGCM010000121.1	64832	66131	+	GIB67_000135	1053	rna-gnl|WGS:JACGCM|KingUnif18086.1	GO:0005886(plasma membrane);GO:0016301(kinase activity)	NA	NA	NA	PREDICTED: serine/threonine-protein kinase CDL1 [Ipomoea nil]	NA	3.08265	2.22562	3.05075	1.21242	1.61132	1.58687	5.43572	6.15053	6.54584	3.13396	2.15071	2.62264	11.9835	5.01109	10.0123	9.39675	8.73521	9.84684	167	134	165	80	101	103	322	277	359	179	144	160	734	330	604	533	500	603
gene-GIB67_000136	JACGCM010000121.1	36521	41151	+	GIB67_000136	1052	rna-gnl|WGS:JACGCM|KingUnif39247.1	GO:0005886(plasma membrane);GO:0016301(kinase activity)	NA	NA	NA	hypothetical protein COLO4_33601 [Corchorus olitorius]	NA	2.81215	1.67896	3.48488	1.04283	1.77664	1.73322	5.24342	6.15234	4.6782	2.4665	3.68066	1.93906	10.9914	5.8637	9.51046	6.75069	6.08284	9.73148	129	86	159	58	94	95	262	234	217	120	209	100	570	327	485	324	295	504
gene-GIB67_000137	JACGCM010000121.1	71394	77908	-	GIB67_000137	1054	rna-gnl|WGS:JACGCM|KingUnif28343.1	GO:0000470(maturation of LSU-rRNA);GO:0003723(RNA binding);GO:0005739(mitochondrion);GO:0006412(translation);GO:0022625(cytosolic large ribosomal subunit)	03010(Ribosome)	K02863	NA	Ribosomal protein L1 [Macleaya cordata]	NA	17.4404	18.8816	11.0437	2.46897	5.01759	3.47367	17.8287	17.0087	20.6242	16.6437	12.799	4.65898	43.6237	12.7762	31.8148	20.7401	20.544	21.5356	1284	1542	808	221	427	306	1432	1039	1535	1292	1163	385	3630	1144	2606	1599	1597	1790
gene-GIB67_000138	JACGCM010000121.1	186018	187226	+	GIB67_000138	1059	rna-gnl|WGS:JACGCM|KingUnif22746.1	GO:0004806(triglyceride lipase activity);GO:0005737(cytoplasm);GO:0006629(lipid metabolic process);GO:0008970(phosphatidylcholine 1-acylhydrolase activity);GO:0009507(chloroplast);GO:0009650(UV protection);GO:0016042(lipid catabolic process);GO:0071493(cellular response to UV-B)	00220(Arginine biosynthesis)	K00145	EC:1.2.1.38	hypothetical protein AQUCO_03900130v1 [Aquilegia coerulea]	NA	0.816875	0.846144	1.28222	9.04053	12.7042	8.26311	2.28761	2.39481	1.83033	0.422459	0	2.9814	1.67822	0	0.85733	0.52583	0.017429	0.232637	55	63	85	729	974	656	166	132	123	30	0	222	126	0	64	37	2	18
gene-GIB67_000140	JACGCM010000121.1	122118	123536	+	GIB67_000140	1055	rna-gnl|WGS:JACGCM|KingUnif03580.1	GO:0004674(protein serine/threonine kinase activity);GO:0005515(protein binding);GO:0005524(ATP binding);GO:0005622(intracellular);GO:0005886(plasma membrane);GO:0016301(kinase activity);GO:0018105(peptidyl-serine phosphorylation);GO:0018107(peptidyl-threonine phosphorylation);GO:0035556(intracellular signal transduction)	NA	NA	NA	CBL-interacting serine/threonine-protein kinase 12-like [Carica papaya]	NA	11.8377	7.65903	13.2151	91.4367	55.2428	79.8795	26.968	29.0238	30.0754	9.24625	41.304	36.9018	21.7736	7.10424	26.5484	11.2913	13.6023	4.66987	923	663	1024	8647	4971	7433	2293	1878	2370	760	3973	3224	1919	674	2303	922	1120	411
gene-GIB67_000141	JACGCM010000121.1	127630	128086	+	GIB67_000141	1056	rna-gnl|WGS:JACGCM|KingUnif41967.1	NA	NA	NA	NA		NA	2.20299	1.72723	2.51063	0.358444	0.41781	0.86645	1.24976	1.29735	0.619648	4.09243	1.09352	0.193719	12.98	2.31195	8.60183	7.26709	5.61948	1.9415	46	40	52	10	11	22	29	23	14	90	29	5	306	59	200	159	124	46
gene-GIB67_000142	JACGCM010000121.1	129514	130863	-	GIB67_000142	1057	rna-gnl|WGS:JACGCM|KingUnif04063.1	GO:0004674(protein serine/threonine kinase activity);GO:0005524(ATP binding);GO:0005829(cytosol);GO:0009737(response to abscisic acid);GO:0016301(kinase activity);GO:0018105(peptidyl-serine phosphorylation);GO:0018107(peptidyl-threonine phosphorylation);GO:0035556(intracellular signal transduction)	NA	NA	NA	Protein kinase domain [Macleaya cordata]	NA	0	0	0	0	0	0.044432	0	0	0	0	0	0	0.155112	0	0.133981	0	0.027244	0	0	0	0	0	0	4	0	0	0	0	0	0	13	0	12	0	3	0
gene-GIB67_000144	JACGCM010000121.1	309883	314996	+	GIB67_000144	1063	rna-gnl|WGS:JACGCM|KingUnif26030.1	GO:0004821(histidine-tRNA ligase activity);GO:0005739(mitochondrion);GO:0006427(histidyl-tRNA aminoacylation);GO:0032543(mitochondrial translation)	00970(Aminoacyl-tRNA biosynthesis)	K01892	EC:6.1.1.21	Aromatic amino acid lyase [Macleaya cordata]	NA	19.3533	12.697	16.4845	16.8073	22.7175	18.816	21.5069	22.7049	20.7693	21.8412	25.8239	18.5339	33.8511	20.2954	37.0384	25.5355	26.1209	23.4335	1815	1321	1536	1912	2459	2107	2200	1767	1969	2159	2989	1948	3588	2314	3864	2507	2587	2481
gene-GIB67_000147	JACGCM010000121.1	404450	406858	+	GIB67_000147	1064	rna-gnl|WGS:JACGCM|KingUnif18579.1	GO:0005929(cilium);GO:0035091(phosphatidylinositol binding);GO:0061512(protein localization to cilium)	NA	NA	NA	tubby-like F-box protein 7 [Morus notabilis]	NA	7.22632	6.4209	11.6429	13.4649	17.1768	17.2518	13.6528	13.7353	11.6567	9.46282	20.4497	19.7585	18.5295	23.7641	17.88	7.88737	11.7548	12.5135	284	280	454	641	778	808	584	448	463	392	990	869	822	1134	781	324	487	555
gene-GIB67_000148	JACGCM010000121.1	408536	419744	+	GIB67_000148	1065	rna-gnl|WGS:JACGCM|KingUnif37590.1	GO:0003674(molecular_function);GO:0005737(cytoplasm)	NA	NA	NA	Rab3-GAP regulatory subunit [Macleaya cordata]	NA	8.67806	13.8299	6.54233	6.33601	5.26619	4.64842	8.24034	6.54788	12.8476	6.34519	3.35113	4.45347	8.0605	3.39	6.42341	6.42828	7.47771	5.44894	621	1097	465	550	435	397	643	389	929	478	296	357	652	295	511	481	565	440
gene-GIB67_000149	JACGCM010000121.1	431611	439377	+	GIB67_000149	1067	rna-gnl|WGS:JACGCM|KingUnif30885.1	NA	NA	NA	NA		NA	0.26385	0.400878	0	0	0.047166	0	0	0	0.198235	0.452717	5.11309	0.840752	0	0	0.232807	0.093307	0.751623	0.451464	4	7	0	0	1	0	0	0	3	7	87	13	0	0	4	2	11	7
gene-GIB67_000150	JACGCM010000121.1	463589	473599	-	GIB67_000150	1070	rna-gnl|WGS:JACGCM|KingUnif40854.1	GO:0003779(actin binding);GO:0005515(protein binding);GO:0005737(cytoplasm);GO:0005856(cytoskeleton);GO:0030036(actin cytoskeleton organization);GO:0031209(SCAR complex);GO:0051127(positive regulation of actin nucleation)	00620(Pyruvate metabolism);00710(Carbon fixation in photosynthetic organisms)	K01595	EC:4.1.1.31	WH2 domain [Macleaya cordata]	NA	0.406854	0.227235	0.157372	0.284835	0.355231	0.539707	0.914974	1.06545	0.628338	0.534376	0.680154	0.374418	3.9386	0.383334	5.39811	2.42898	1.6308	1.77298	92	57	36	78	93	145	225	199	143	127	189	95	1001	105	1351	572	388	450
gene-GIB67_000151	JACGCM010000121.1	423922	427734	-	GIB67_000151	1066	rna-gnl|WGS:JACGCM|KingUnif39458.1	GO:0004197(cysteine-type endopeptidase activity);GO:0005615(extracellular space);GO:0005764(lysosome);GO:0051603(proteolysis involved in cellular protein catabolic process)	NA	NA	NA	Oryzain alpha chain like [Actinidia chinensis var. chinensis]	NA	192.946	113.931	294.228	201.272	129.593	219.878	191.889	228.921	201.505	49.8344	70.9133	48.4182	10.8006	1.47648	22.3097	5.10551	25.1049	2.1536	35148	23024	53237	44479	27247	47811	38117	34603	37102	9567	15940	9885	2224	327	4521	974	4829	443
gene-GIB67_000152	JACGCM010000121.1	449888	462617	-	GIB67_000152	1069	rna-gnl|WGS:JACGCM|KingUnif10547.1	GO:0005829(cytosol);GO:0008964(phosphoenolpyruvate carboxylase activity);GO:0009507(chloroplast);GO:0048046(apoplast);GO:0048366(leaf development)	00620(Pyruvate metabolism);00710(Carbon fixation in photosynthetic organisms)	K01595	EC:4.1.1.31	Phosphoenolpyruvate carboxylase [Macleaya cordata]	NA	109.283	92.1174	94.3451	493.384	257.459	438.278	191.687	191.781	193.308	114.411	269.113	246.315	69.666	91.4743	93.6214	142.462	154.416	120.591	21349	19963	18307	116922	58048	102198	40832	31088	38169	23552	64869	53924	15380	21725	20345	29131	31850	26591
gene-GIB67_000153	JACGCM010000121.1	436507	449789	-	GIB67_000153	1068	rna-gnl|WGS:JACGCM|KingUnif31102.1	GO:0044255(cellular lipid metabolic process);GO:0052689(carboxylic ester hydrolase activity)	00040(Pentose and glucuronate interconversions);00051(Fructose and mannose metabolism)	K01805	EC:5.3.1.5	PREDICTED: uncharacterized protein LOC104611600 [Nelumbo nucifera]	NA	10.7053	14.8762	8.99049	8.56558	9.64778	5.93325	15.1506	14.8294	18.2828	6.28564	3.33465	3.56778	4.79188	1.9602	2.53239	3.89427	4.54244	3.02079	1270	1957	1059	1232	1321	840	1959	1459	2191	786	488	474	642	283	334	484	569	405
gene-GIB67_000154	JACGCM010000121.1	683015	685773	+	GIB67_000154	1075	rna-gnl|WGS:JACGCM|KingUnif36999.1	GO:0003674(molecular_function);GO:0005576(extracellular region);GO:0008150(biological_process);GO:0048046(apoplast)	03050(Proteasome)	K03036	NA	Pollen Ole e 1 allergen/extensin [Macleaya cordata]	NA	0	0	0	0.131182	0.052284	0	0.115578	0	0	0	0	0	0	0	0	0	0	0	0	0	0	8	4	0	7	0	0	0	0	0	0	0	0	0	0	0
gene-GIB67_000155	JACGCM010000121.1	685916	689735	-	GIB67_000155	1076	rna-gnl|WGS:JACGCM|KingUnif19590.1	GO:0005789(endoplasmic reticulum membrane);GO:0006636(unsaturated fatty acid biosynthetic process);GO:0009507(chloroplast);GO:0009579(thylakoid);GO:0009979(16:0 monogalactosyldiacylglycerol desaturase activity);GO:0010205(photoinhibition);GO:0016021(integral component of membrane);GO:0016491(oxidoreductase activity);GO:0016717(oxidoreductase activity, acting on paired donors, with oxidation of a …	NA	NA	NA	PREDICTED: palmitoyl-monogalactosyldiacylglycerol delta-7 desaturase, chloroplastic [Fragaria vesca subsp. vesca]	NA	1.31494	1.53742	1.4356	3.1621	3.13549	5.35563	2.4396	1.88702	1.81283	0.704777	1.75394	2.52321	0.721314	1.12553	1.23561	2.74173	2.70567	0.85577	97	126	105	282	266	470	196	115	135	55	159	208	60	101	101	211	210	71
gene-GIB67_000162	JACGCM010000121.1	843507	852651	+	GIB67_000162	1079	rna-gnl|WGS:JACGCM|KingUnif32231.1	GO:0005524(ATP binding);GO:0005773(vacuole);GO:0005774(vacuolar membrane);GO:0005794(Golgi apparatus);GO:0005829(cytosol);GO:0005886(plasma membrane);GO:0009506(plasmodesma);GO:0009507(chloroplast);GO:0010255(glucose mediated signaling pathway);GO:0015991(ATP hydrolysis coupled proton transport);GO:0016020(membrane);GO:0016787(hydrolase activity);GO:0030835(negative regulation of actin filament d…	00190(Oxidative phosphorylation);04145(Phagosome)	K02147	NA	V-type proton ATPase subunit B 2 [Papaver somniferum]	NA	71.9294	48.0267	66.0132	138.192	151.127	159.328	78.1319	85.7395	76.6824	91.8158	135.132	140.012	83.2008	96.924	96.9529	76.3306	77.2697	66.4603	9832	7282	8962	22913	23841	25994	11645	9724	10594	13224	22791	21446	12852	16106	14742	10921	11151	10254
gene-GIB67_000164	JACGCM010000121.1	916807	917217	+	GIB67_000164	1085	rna-gnl|WGS:JACGCM|KingUnif16010.1	GO:0005737(cytoplasm);GO:0010090(trichome morphogenesis)	NA	NA	NA	Protein of unknown function DUF538 [Macleaya cordata]	NA	0	0.150118	0	0	0	0.066294	0.074195	0.199271	0.38853	0	0.134004	0	0.214248	3.08789	0.085469	0.122426	106.521	0.262639	0	4	0	0	0	2	2	4	9	0	4	0	6	85	3	3	2540	7
gene-GIB67_000165	JACGCM010000121.1	914615	915283	+	GIB67_000165	1084	rna-gnl|WGS:JACGCM|KingUnif17470.1	GO:0003674(molecular_function);GO:0005576(extracellular region);GO:0008150(biological_process);GO:0048046(apoplast)	03050(Proteasome)	K03036	NA	Pollen Ole e 1 allergen/extensin [Macleaya cordata]	NA	0.558579	0.455048	0.291668	0.117409	0	0	0	0	0	0.204124	0	0	0	0	0	0	0	0.089274	16	14	8	4	0	0	0	0	0	6	0	0	0	0	0	0	0	3
gene-GIB67_000166	JACGCM010000121.1	906136	913447	+	GIB67_000166	1083	rna-gnl|WGS:JACGCM|KingUnif06455.1	GO:0005509(calcium ion binding);GO:0005515(protein binding);GO:0005634(nucleus);GO:0005737(cytoplasm);GO:0005829(cytosol);GO:0005886(plasma membrane);GO:0009570(chloroplast stroma);GO:0019904(protein domain specific binding);GO:0045309(protein phosphorylated amino acid binding);GO:0048528(post-embryonic root development)	NA	NA	NA	14-3-3 protein [Macleaya cordata]	NA	123.88	110.787	81.8895	99.3882	106.351	87.0637	110.16	118.502	99.6213	156.9	213.165	144.448	168.101	126.501	182.684	192.661	213.779	176.553	6132	6084	4026	5968	6076	5144	5946	4868	4984	8184	13020	8013	9403	7613	10059	9982	11173	9864
gene-GIB67_000167	JACGCM010000121.1	918288	922783	-	GIB67_000167	1086	rna-gnl|WGS:JACGCM|KingUnif37286.1	GO:0005634(nucleus);GO:0006970(response to osmotic stress);GO:0009651(response to salt stress);GO:0009737(response to abscisic acid);GO:0009738(abscisic acid-activated signaling pathway);GO:0009789(positive regulation of abscisic acid-activated signaling pathway);GO:0045454(cell redox homeostasis)	NA	NA	NA	TPR repeat-containing thioredoxin TTL1-like [Papaver somniferum]	NA	16.3299	12.7052	17.8732	11.4607	13.5423	12.5878	15.6148	24.5225	25.5885	12.1726	10.3641	7.54832	15.2904	10.4942	14.4718	11.8922	10.1481	12.6721	2382	2056	2590	2028	2280	2192	2484	2968	3773	1871	1866	1234	2521	1861	2349	1816	1563	2087
gene-GIB67_000168	JACGCM010000121.1	900575	902113	-	GIB67_000168	1081	rna-gnl|WGS:JACGCM|KingUnif01925.1	NA	NA	NA	NA		NA	0	0	0	0	0.417349	0	0	0	0	0	0	0	0	0	0	0	0	0	0	0	0	0	25	0	0	0	0	0	0	0	0	0	0	0	0	0
gene-GIB67_000169	JACGCM010000121.1	904209	905606	-	GIB67_000169	1082	rna-gnl|WGS:JACGCM|KingUnif20033.1	NA	NA	NA	NA		NA	0	0	0	0.077417	0.099453	0.087745	0	0	0	0	0	0	0	0	0	0	0	0	0	0	0	4	4	4	0	0	0	0	0	0	0	0	0	0	0	0
gene-GIB67_000171	JACGCM010000121.1	998442	1037242	-	GIB67_000171	1087	rna-gnl|WGS:JACGCM|KingUnif09755.1	GO:0005737(cytoplasm);GO:0005829(cytosol);GO:0016301(kinase activity)	NA	NA	NA	Protein kinase domain [Macleaya cordata]	NA	5.53559	5.28	7.26326	15.0637	15.8663	18.4533	11.6651	12.5048	10.8197	7.25265	12.3968	12.9208	7.34884	11.1727	10.0356	7.13485	7.92617	9.3442	1013	1072	1320	3342	3349	4029	2327	1898	2000	1398	2798	2649	1519	2485	2042	1366	1531	1929
gene-GIB67_000172	JACGCM010000121.1	1145335	1146392	+	GIB67_000172	1091	rna-gnl|WGS:JACGCM|KingUnif11688.1	GO:0046658(anchored component of plasma membrane)	NA	NA	NA	lamin-like protein [Ziziphus jujuba]	NA	10.3985	8.15185	12.5675	26.1071	34.3219	29.6882	37.2786	29.529	14.6102	22.2034	14.4	23.9495	41.5452	47.3806	79.5418	82.7252	54.9292	27.3715	568	494	681	1728	2161	1934	2218	1337	806	1277	970	1465	2562	3143	4827	4724	3164	1686
gene-GIB67_000175	JACGCM010000121.1	1169213	1174398	-	GIB67_000175	1092	rna-gnl|WGS:JACGCM|KingUnif05218.1	GO:0004455(ketol-acid reductoisomerase activity);GO:0005507(copper ion binding);GO:0005618(cell wall);GO:0005739(mitochondrion);GO:0005829(cytosol);GO:0009082(branched-chain amino acid biosynthetic process);GO:0009097(isoleucine biosynthetic process);GO:0009099(valine biosynthetic process);GO:0009507(chloroplast);GO:0009536(plastid);GO:0009570(chloroplast stroma);GO:0009941(chloroplast envelope);…	00290(Valine, leucine and isoleucine biosynthesis);00770(Pantothenate and CoA biosynthesis)	K00053	EC:1.1.1.86	Acetohydroxy acid isomeroreductase C-terminal [Macleaya cordata]	NA	69.9333	51.1144	89.9983	37.1586	56.8454	53.4428	213.134	175.523	185.031	84.5812	74.0828	92.6087	133.129	73.9309	192.834	152.829	107.791	86.0427	8491	6885	10853	5473	7966	7745	28216	17683	22706	10821	11099	12601	18266	10913	26044	19422	13818	11791
gene-GIB67_000176	JACGCM010000121.1	1174844	1201648	-	GIB67_000176	1093	rna-gnl|WGS:JACGCM|KingUnif07752.1	GO:0003677(DNA binding);GO:0004402(histone acetyltransferase activity);GO:0005634(nucleus);GO:0006355(regulation of transcription, DNA-templated);GO:0009506(plasmodesma);GO:0010385(double-stranded methylated DNA binding);GO:0042393(histone binding);GO:0043971(histone H3-K18 acetylation);GO:0043972(histone H3-K23 acetylation);GO:0044030(regulation of DNA methylation);GO:0044154(histone H3-K14 acet…	00071(Fatty acid degradation);00592(alpha-Linolenic acid metabolism);01040(Biosynthesis of unsaturated fatty acids);04146(Peroxisome)	K00232	EC:1.3.3.6	GNAT domain [Macleaya cordata]	NA	6.19669	5.82787	3.21172	6.08658	7.3515	6.35202	5.21561	8.20656	9.60389	5.43978	6.8359	5.05933	14.0237	1.71042	10.884	4.22656	6.27054	7.25005	1530	1597	788	1823	2095	1872	1405	1682	2397	1416	2083	1400	3913	514	2990	1093	1635	2021
gene-GIB67_000177	JACGCM010000121.1	1203596	1205428	-	GIB67_000177	1094	rna-gnl|WGS:JACGCM|KingUnif39575.1	GO:0005886(plasma membrane);GO:0016021(integral component of membrane);GO:0042626(ATPase activity, coupled to transmembrane movement of substances)	02010(ABC transporters)	K05681	NA	ABC transporter-like [Macleaya cordata]	NA	0	0	0	0	0	0	0	0	0	0	0	0	0	0.048685	0.070942	0.216443	0.588919	0.22195	0	0	0	0	0	0	0	0	0	0	0	0	0	6	8	23	63	26
gene-GIB67_000178	JACGCM010000121.1	1206251	1219038	-	GIB67_000178	1095	rna-gnl|WGS:JACGCM|KingUnif37984.1	GO:0005743(mitochondrial inner membrane);GO:0030150(protein import into mitochondrial matrix);GO:0051087(chaperone binding)	NA	NA	NA	mitochondrial import inner membrane translocase subunit TIM44-2-like [Papaver somniferum]	NA	11.1756	9.56434	9.05496	14.5152	18.5614	14.5552	14.7998	14.9199	13.59	11.9315	16.6354	16.7307	12.4797	10.7131	15.8161	8.75398	13.4847	10.7772	1267	1203	1020	1996	2428	1970	1829	1404	1557	1425	2327	2125	1599	1477	1994	1039	1614	1379
gene-GIB67_000179	JACGCM010000121.1	1329994	1333784	+	GIB67_000179	1096	rna-gnl|WGS:JACGCM|KingUnif11259.1	GO:0000422(autophagy of mitochondrion);GO:0005829(cytosol);GO:0006501(C-terminal protein lipidation);GO:0006995(cellular response to nitrogen starvation);GO:0016236(macroautophagy);GO:0019778(Atg12 activating enzyme activity);GO:0019779(Atg8 activating enzyme activity);GO:0030163(protein catabolic process);GO:0032446(protein modification by small protein conjugation);GO:0034727(piecemeal microaut…	04136(Autophagy - other eukaryotes)	K08337	NA	UBA/THIF-type NAD/FAD binding fold [Macleaya cordata]	NA	15.5194	12.8358	14.4243	16.5533	13.3244	13.4454	14.6663	16.4431	15.473	8.59756	10.5311	10.4498	9.61283	7.17597	8.1323	5.95389	9.73061	7.4397	1843	1691	1701	2384	1826	1906	1899	1620	1857	1076	1543	1391	1290	1036	1074	740	1220	997
gene-GIB67_000180	JACGCM010000121.1	1335379	1340443	-	GIB67_000180	1097	rna-gnl|WGS:JACGCM|KingUnif10072.1	GO:0004565(beta-galactosidase activity);GO:0005618(cell wall);GO:0005773(vacuole)	00052(Galactose metabolism);00600(Sphingolipid metabolism);00531(Glycosaminoglycan degradation);00604(Glycosphingolipid biosynthesis - ganglio series);00511(Other glycan degradation)	K12309	EC:3.2.1.23	Beta-galactosidase [Actinidia chinensis var. chinensis]	NA	0	0	0	0	0	0	0	0	0	0	0	0	0.059447	0	0	0	0	0	0	0	0	0	0	0	0	0	0	0	0	0	8	0	0	0	0	0
gene-GIB67_000181	JACGCM010000121.1	1455233	1461700	+	GIB67_000181	1100	rna-gnl|WGS:JACGCM|KingUnif37394.1	GO:0003723(RNA binding);GO:0003729(mRNA binding);GO:0005634(nucleus);GO:0005730(nucleolus);GO:0005829(cytosol);GO:0006952(defense response);GO:0008219(cell death);GO:0009693(ethylene biosynthetic process);GO:0010150(leaf senescence)	03040(Spliceosome)	K12741	NA	RNA recognition motif domain [Macleaya cordata]	NA	31.6996	38.8332	22.7613	20.1317	23.4809	23.5576	27.9181	30.1107	34.7167	26.7777	37.7098	26.6421	56.0119	29.134	46.1923	38.0525	25.407	34.7297	2989	4061	2132	2303	2555	2651	2870	2356	3308	2661	4387	2815	5968	3339	4845	3755	2529	3696
gene-GIB67_000182	JACGCM010000121.1	1387754	1392636	+	GIB67_000182	1099	rna-gnl|WGS:JACGCM|KingUnif40202.1	GO:0005768(endosome);GO:0005774(vacuolar membrane);GO:0005802(trans-Golgi network);GO:0008757(S-adenosylmethionine-dependent methyltransferase activity);GO:0032259(methylation)	NA	NA	NA	Demethylmenaquinone methyltransferase [Vitis vinifera]	NA	8.27091	7.64535	7.60029	2.44071	3.42412	3.36283	5.25235	7.22717	8.36582	1.02931	0.285561	1.19051	2.81745	0.614526	3.38184	1.47464	2.50742	1.45584	373	382	340	134	178	181	258	270	381	49	16	61	144	34	170	70	120	74
gene-GIB67_000183	JACGCM010000121.1	1467264	1467825	+	GIB67_000183	1102	rna-gnl|WGS:JACGCM|KingUnif34766.1	NA	NA	NA	NA		NA	0	0	0	0	0	0	0	0.092532	0	0	0	0	0	0	0	0	0	0	0	0	0	0	0	0	0	2	0	0	0	0	0	0	0	0	0	0
gene-GIB67_000185	JACGCM010000121.1	1379625	1380254	+	GIB67_000185	1098	rna-gnl|WGS:JACGCM|KingUnif03352.1	GO:0005768(endosome);GO:0005774(vacuolar membrane);GO:0005802(trans-Golgi network);GO:0008757(S-adenosylmethionine-dependent methyltransferase activity);GO:0032259(methylation)	NA	NA	NA	PREDICTED: uncharacterized protein LOC104903532 isoform X1 [Beta vulgaris subsp. vulgaris]	NA	5.04754	5.26781	2.9148	2.43246	2.70486	2.89331	2.9859	3.21644	4.23685	0.196941	0	0.495145	2.6533	0.244698	1.85196	1.56953	0.873521	0.58551	152	175	87	89	94	104	98	80	129	7	0	17	90	9	62	50	28	20
gene-GIB67_000186	JACGCM010000121.1	1576109	1582301	-	GIB67_000186	1104	rna-gnl|WGS:JACGCM|KingUnif26063.1	NA	NA	NA	NA	uncharacterized protein LOC18780902 isoform X1 [Prunus persica]	NA	4.49988	6.02792	5.84176	11.8644	9.96492	8.32452	11.2699	12.251	9.99427	7.04264	14.1059	11.4251	3.81018	3.38313	3.03984	6.2081	10.4366	5.76962	440	654	567	1406	1124	971	1201	993	987	725	1701	1251	421	402	331	635	1077	637
gene-GIB67_000188	JACGCM010000121.1	1618067	1624925	+	GIB67_000188	1107	rna-gnl|WGS:JACGCM|KingUnif38431.1	GO:0004842(ubiquitin-protein transferase activity);GO:0005515(protein binding);GO:0005634(nucleus);GO:0005730(nucleolus);GO:0005737(cytoplasm);GO:0006511(ubiquitin-dependent protein catabolic process);GO:0016567(protein ubiquitination);GO:0019005(SCF ubiquitin ligase complex)	04141(Protein processing in endoplasmic reticulum);04120(Ubiquitin mediated proteolysis)	K03094	NA	PREDICTED: SKP1-like protein 1B [Beta vulgaris subsp. vulgaris]	NA	0.164019	0	0	0	0	0	0	0	0.286931	0	0	0	0.346606	0	0.091804	0	0.180884	0	5	0	0	0	0	0	0	0	9	0	0	0	12	0	4	0	6	0
gene-GIB67_000190	JACGCM010000121.1	1601602	1602712	-	GIB67_000190	1105	rna-gnl|WGS:JACGCM|KingUnif00014.1	GO:0005515(protein binding);GO:0005524(ATP binding);GO:0005634(nucleus);GO:0006952(defense response);GO:0043531(ADP binding)	04626(Plant-pathogen interaction)	K13457	NA	PREDICTED: disease resistance protein RPP8-like [Nelumbo nucifera]	NA	0	0.146705	0	0.211661	0.088501	0	0.306519	0.347839	0.069226	0	0.315932	0	0.366796	0	0	0.138171	0.008284	0.015774	0	7	0	11	5	0	15	13	3	0	17	0	18	0	0	7	1	1
gene-GIB67_000191	JACGCM010000121.1	1611127	1611467	-	GIB67_000191	1106	rna-gnl|WGS:JACGCM|KingUnif01138.1	NA	NA	NA	NA		NA	0	0.54739	0	0.054773	0	0.162358	0.580582	0	0.749605	0	0	0	0	0	0	0.330622	0	0.622194	0	9	0	1	0	3	10	0	11	0	0	0	0	0	0	6	0	11
gene-GIB67_000192	JACGCM010000121.1	1780729	1782003	+	GIB67_000192	1115	rna-gnl|WGS:JACGCM|KingUnif25504.1	GO:0004806(triglyceride lipase activity);GO:0005737(cytoplasm);GO:0006629(lipid metabolic process);GO:0008970(phosphatidylcholine 1-acylhydrolase activity);GO:0010187(negative regulation of seed germination);GO:0019915(lipid storage);GO:0046340(diacylglycerol catabolic process);GO:0047372(acylglycerol lipase activity);GO:0052651(monoacylglycerol catabolic process)	00220(Arginine biosynthesis)	K00145	EC:1.2.1.38	Lipase [Macleaya cordata]	NA	0	0.078764	0	0.098703	0	0	0	0	0	0	0	0.724268	0	0	0	0	0.282745	0.429879	0	6	0	8	0	0	0	0	0	0	0	54	0	0	0	0	20	32
gene-GIB67_000193	JACGCM010000121.1	1724459	1738353	+	GIB67_000193	1111	rna-gnl|WGS:JACGCM|KingUnif10563.1	GO:0003674(molecular_function);GO:0005575(cellular_component);GO:0009793(embryo development ending in seed dormancy);GO:0048868(pollen tube development)	04145(Phagosome)	K01365	EC:3.4.22.15	hypothetical protein AQUCO_05500024v1 [Aquilegia coerulea]	NA	2.84388	3.30509	3.92717	7.96421	7.58005	6.23381	5.03078	3.52662	3.30145	1.83736	4.02565	5.13506	4.46858	1.69494	6.63391	4.22495	4.05121	1.82716	171	220	234	580	525	447	330	176	201	117	298	346	303	124	443	266	257	124
gene-GIB67_000194	JACGCM010000121.1	1699531	1709349	+	GIB67_000194	1109	rna-gnl|WGS:JACGCM|KingUnif41917.1	GO:0003674(molecular_function);GO:0005575(cellular_component);GO:0009793(embryo development ending in seed dormancy);GO:0048868(pollen tube development)	04145(Phagosome)	K01365	EC:3.4.22.15	uncharacterized protein YNL011C-like [Papaver somniferum]	NA	1.28825	1.57306	2.17773	3.07066	2.86583	3.72938	3.0199	1.08526	2.24501	0.481596	2.13303	2.58907	2.13086	0.509376	2.92161	0.720878	1.97724	0.996737	71	96	119	205	182	245	182	50	125	28	145	160	133	35	179	42	115	62
gene-GIB67_000195	JACGCM010000121.1	1744124	1748070	+	GIB67_000195	1113	rna-gnl|WGS:JACGCM|KingUnif30798.1	GO:0005794(Golgi apparatus);GO:0016413(O-acetyltransferase activity);GO:0071554(cell wall organization or biogenesis)	NA	NA	NA	hypothetical protein AQUCO_05500054v1 [Aquilegia coerulea]	NA	105.853	32.2317	279.672	290.636	263.689	321.745	234.559	232.995	191.393	36.8053	275.778	269.287	23.9769	26.1825	57.488	33.9214	20.1992	99.3173	8589	2902	22540	28608	24694	31162	20753	15687	15697	3147	27611	24487	2199	2583	5189	2881	1731	9096
gene-GIB67_000196	JACGCM010000121.1	1774396	1776094	+	GIB67_000196	1114	rna-gnl|WGS:JACGCM|KingUnif28084.1	NA	NA	NA	NA		NA	0	0.057564	0	0.444189	0.144163	0.044759	0.505132	0.14809	0.461632	0.12627	0.091339	0.122136	0.56169	0.921198	0.904294	9.8319	4.50182	17.6166	0	4	0	29	9	3	29	7	25	7	6	8	34	59	53	540	250	1043
gene-GIB67_000197	JACGCM010000121.1	1741193	1742636	-	GIB67_000197	1112	rna-gnl|WGS:JACGCM|KingUnif08805.1	NA	NA	NA	NA	retrotransposon protein [Cucumis melo subsp. melo]	NA	0.171273	0	0	0	0.270867	0.153204	0.252823	0.04783	0.566645	0.026654	0	0	0	0	0	0.076125	0	0	8	0	0	0	14	8	13	2	26	2	0	0	0	0	0	4	0	0
gene-GIB67_000198	JACGCM010000121.1	1719491	1720362	+	GIB67_000198	1110	rna-gnl|WGS:JACGCM|KingUnif42241.1	NA	04145(Phagosome)	K01365	EC:3.4.22.15	maternal effect embryo arrest [Trema orientale]	NA	0	0	0	1.06077	2.03944	0	0	0	0	0	0.847411	0	1.46524	0	0	0	0.61878	0	0	0	0	23	42	0	0	0	0	0	19	0	29	0	0	0	12	0
gene-GIB67_000199	JACGCM010000121.1	1794207	1817948	+	GIB67_000199	1117	rna-gnl|WGS:JACGCM|KingUnif32972.1	GO:0006400(tRNA modification);GO:0052381(tRNA dimethylallyltransferase activity)	00908(Zeatin biosynthesis)	K00791	EC:2.5.1.75	tRNA dimethylallyltransferase 9 [Jatropha curcas]	NA	4.52782	4.36333	4.77432	6.09155	6.81746	6.80564	9.35497	8.26639	8.48652	3.14515	3.32781	6.80091	5.37803	1.24056	6.29645	3.22455	4.2921	4.81039	394	421	412	642	683	706	886	596	745	288	357	662	528	131	608	293	394	472
gene-GIB67_000200	JACGCM010000121.1	1782528	1783556	+	GIB67_000200	1116	rna-gnl|WGS:JACGCM|KingUnif03893.1	GO:0006400(tRNA modification);GO:0052381(tRNA dimethylallyltransferase activity)	00908(Zeatin biosynthesis)	K00791	EC:2.5.1.75	tRNA dimethylallyltransferase 9 isoform X1 [Cinnamomum micranthum f. kanehirae]	NA	2.11682	2.88966	3.0958	3.10582	3.86505	4.72723	5.78928	6.505	6.93009	0.97599	1.93978	3.81377	4.79641	1.5406	3.18568	0.894132	1.77497	1.01204	63	95	91	111	132	166	186	159	206	31	71	126	160	56	105	28	56	34
gene-GIB67_000201	JACGCM010000121.1	1869226	1877072	+	GIB67_000201	1122	rna-gnl|WGS:JACGCM|KingUnif22603.1	NA	NA	NA	NA	protein MAINTENANCE OF MERISTEMS-like [Papaver somniferum]	NA	0	0	0	0	0	0	0	0	0	0.030433	0	0	0	0	0	0	0	0	0	0	0	0	0	0	0	0	0	4	0	0	0	0	0	0	0	0
gene-GIB67_000202	JACGCM010000121.1	1820783	1822447	-	GIB67_000202	1118	rna-gnl|WGS:JACGCM|KingUnif33193.1	GO:0005634(nucleus);GO:0008150(biological_process);GO:0016021(integral component of membrane)	NA	NA	NA	hypothetical protein BVC80_289g27 [Macleaya cordata]	NA	0	0	0	0	0	0	0	0	0	0	0	0	0	0	0.038788	0	0	0	0	0	0	0	0	0	0	0	0	0	0	0	0	0	4	0	0	0
gene-GIB67_000203	JACGCM010000121.1	1843002	1850792	-	GIB67_000203	1119	rna-gnl|WGS:JACGCM|KingUnif14199.1	GO:0003677(DNA binding);GO:0005634(nucleus);GO:0006351(transcription, DNA-templated);GO:0006355(regulation of transcription, DNA-templated);GO:0009294(DNA mediated transformation);GO:0045931(positive regulation of mitotic cell cycle);GO:0048364(root development)	NA	NA	NA	transcription factor GTE4-like isoform X2 [Durio zibethinus]	NA	13.2515	14.3625	9.41341	14.1707	11.0713	10.7983	19.4989	16.1573	34.9298	11.4275	13.9085	8.73344	7.12732	3.90524	6.35235	6.72595	9.46401	6.74594	1872	2251	1321	2428	1805	1821	3003	1894	4987	1701	2424	1383	1138	671	999	995	1412	1076
gene-GIB67_000204	JACGCM010000121.1	1854544	1861291	-	GIB67_000204	1120	rna-gnl|WGS:JACGCM|KingUnif37442.1	NA	NA	NA	NA	Protein of unknown function DUF3245 [Macleaya cordata]	NA	19.545	23.3279	12.0355	19.4646	15.9654	12.6435	14.9531	22.1033	16.8749	23.8609	20.3635	15.0163	15.3738	11.9892	18.6628	18.5457	18.4003	8.6605	1105	1463	676	1335	1042	854	922	1037	965	1422	1421	952	983	824	1174	1098	1099	553
gene-GIB67_000205	JACGCM010000121.1	1864828	1865404	-	GIB67_000205	1121	rna-gnl|WGS:JACGCM|KingUnif03558.1	NA	04626(Plant-pathogen interaction)	K13457	NA	uncharacterized protein LOC113348760 [Papaver somniferum]	NA	0.122054	0.157805	0.069515	0.092566	0.103938	0	0.176533	0.154656	0.443687	0	0.12661	0	0	0.363715	0	0	0	0	3	4	2	3	3	0	4	3	9	0	3	0	0	9	0	0	0	0
gene-GIB67_000208	JACGCM010000121.1	1947626	1951532	+	GIB67_000208	1126	rna-gnl|WGS:JACGCM|KingUnif30864.1	NA	NA	NA	NA		NA	0	0	0	0	0	0	0	0	0	0	0	0	0	0	0	0.068122	0.128249	0.111311	0	0	0	0	0	0	0	0	0	0	0	0	0	0	0	6	11	10
gene-GIB67_000209	JACGCM010000121.1	1944052	1947275	+	GIB67_000209	1125	rna-gnl|WGS:JACGCM|KingUnif07726.1	GO:0003674(molecular_function);GO:0005739(mitochondrion);GO:0008150(biological_process);GO:0016021(integral component of membrane)	NA	NA	NA	hypothetical protein BVC80_8895g6 [Macleaya cordata]	NA	0	0	0	0	0	0	0	0	0	0	0	0	0	0.043712	0.022817	0.095857	0	0.476964	0	0	0	0	0	0	0	0	0	0	0	0	0	8	4	14	0	73
gene-GIB67_000210	JACGCM010000121.1	1918023	1943494	-	GIB67_000210	1124	rna-gnl|WGS:JACGCM|KingUnif33866.1	GO:0009507(chloroplast)	NA	NA	NA	AAA+ ATPase domain [Macleaya cordata]	NA	3.76061	3.6144	2.91254	4.96362	5.02777	5.28147	5.73304	3.1024	4.42607	1.9983	2.49986	3.15405	3.45603	1.70587	3.25585	4.77672	4.88581	3.19447	435	464	335	696	671	729	723	298	518	244	357	409	452	240	419	578	597	417
gene-GIB67_000212	JACGCM010000121.1	1911143	1916353	-	GIB67_000212	1123	rna-gnl|WGS:JACGCM|KingUnif32985.1	GO:0016021(integral component of membrane);GO:0016757(transferase activity, transferring glycosyl groups)	NA	NA	NA	hypothetical protein AQUCO_05500071v1 [Aquilegia coerulea]	NA	0.222776	0.155367	0.290029	0	0	0	0	0	0.405647	0.081163	0	0	0	0	0	0.06625	0	0.101371	11	8	14	0	0	0	0	0	19	4	0	0	0	0	0	4	0	6
gene-GIB67_000214	JACGCM010000121.1	2050774	2053272	+	GIB67_000214	1138	rna-gnl|WGS:JACGCM|KingUnif05691.1	GO:0004683(calmodulin-dependent protein kinase activity);GO:0005516(calmodulin binding);GO:0005634(nucleus);GO:0005737(cytoplasm);GO:0009738(abscisic acid-activated signaling pathway);GO:0009931(calcium-dependent protein serine/threonine kinase activity);GO:0018105(peptidyl-serine phosphorylation);GO:0035556(intracellular signal transduction);GO:0046777(protein autophosphorylation)	04626(Plant-pathogen interaction)	K13412	EC:2.7.11.1	Protein kinase domain [Macleaya cordata]	NA	0.276906	0.323484	0.680811	0.501904	0.316364	0.551661	1.23298	2.16811	1.33593	0.241338	0.269967	1.20785	0.336296	0.204346	0.318087	0.219669	0.180904	0.385354	25	32	60	54	32	58	118	158	118	23	30	119	34	22	31	21	17	38
gene-GIB67_000215	JACGCM010000121.1	1995763	2000721	+	GIB67_000215	1132	rna-gnl|WGS:JACGCM|KingUnif08421.1	GO:0005524(ATP binding);GO:0005634(nucleus);GO:0006952(defense response);GO:0043531(ADP binding)	04626(Plant-pathogen interaction)	K13459	NA	hypothetical protein AQUCO_01800036v1 [Aquilegia coerulea]	NA	1.51075	1.42517	1.44703	0	0	0	0.066548	0	0.033351	3.76102	0.060246	0	0.21634	0.078076	0.046731	0.050511	0	2.73706	114	119	109	0	0	0	6	0	3	298	6	0	19	8	4	4	0	233
gene-GIB67_000218	JACGCM010000121.1	2042281	2051020	-	GIB67_000218	1137	rna-gnl|WGS:JACGCM|KingUnif34773.1	GO:0004683(calmodulin-dependent protein kinase activity);GO:0005516(calmodulin binding);GO:0005634(nucleus);GO:0005737(cytoplasm);GO:0009738(abscisic acid-activated signaling pathway);GO:0009931(calcium-dependent protein serine/threonine kinase activity);GO:0018105(peptidyl-serine phosphorylation);GO:0035556(intracellular signal transduction);GO:0046777(protein autophosphorylation)	04626(Plant-pathogen interaction)	K13412	EC:2.7.11.1	hypothetical protein BVC80_7691g2 [Macleaya cordata]	NA	2.83899	2.39764	2.54661	5.46426	5.53744	5.981	7.77892	8.16679	7.35391	2.14465	3.81427	4.39501	4.85416	2.31093	5.36108	3.48058	4.58335	3.7945	441	414	393	1030	993	1109	1318	1053	1155	351	731	765	852	437	927	566	752	666
gene-GIB67_000219	JACGCM010000121.1	2020154	2028632	-	GIB67_000219	1135	rna-gnl|WGS:JACGCM|KingUnif14970.1	GO:0003924(GTPase activity);GO:0005730(nucleolus);GO:0042254(ribosome biogenesis)	03008(Ribosome biogenesis in eukaryotes)	K14538	NA	guanine nucleotide-binding protein-like NSN1 [Populus trichocarpa]	NA	12.7775	11.9432	9.58595	16.6397	19.7657	15.1959	18.3749	20.6577	22.5983	14.0322	38.708	23.3769	23.1125	16.3847	33.2555	16.1989	24.444	11.7593	1623	1683	1210	2564	2898	2304	2545	2178	2902	1879	6067	3328	3318	2530	4699	2154	3278	1686
gene-GIB67_000221	JACGCM010000121.1	2068565	2069040	-	GIB67_000221	1139	rna-gnl|WGS:JACGCM|KingUnif03248.1	GO:0004518(nuclease activity);GO:0005634(nucleus);GO:0006281(DNA repair)	03430(Mismatch repair)	K10746	EC:3.1.-.-	hypothetical protein Ahy_A05g022891 [Arachis hypogaea]	NA	0	0	0	0	0	0	0	0	0	0	0	0	0.796495	0	1.64508	0	0	0	0	0	0	0	0	0	0	0	0	0	0	0	17	0	33	0	0	0
gene-GIB67_000222	JACGCM010000121.1	2001609	2010574	-	GIB67_000222	1133	rna-gnl|WGS:JACGCM|KingUnif22387.1	GO:0003677(DNA binding);GO:0004003(ATP-dependent DNA helicase activity);GO:0005524(ATP binding);GO:0005634(nucleus);GO:0005737(cytoplasm);GO:0006289(nucleotide-excision repair);GO:0006355(regulation of transcription, DNA-templated);GO:0006367(transcription initiation from RNA polymerase II promoter);GO:0008026(ATP-dependent helicase activity);GO:0009411(response to UV);GO:0009636(response to toxi…	03022(Basal transcription factors);03420(Nucleotide excision repair)	K10843	EC:3.6.4.12	Helicase Ercc3 [Macleaya cordata]	NA	10.2713	10.4374	10.2859	17.1968	17.2881	16.0142	21.0447	17.9149	17.8135	13.9011	14.3958	18.0089	12.8716	10.9847	19.6103	19.8071	22.5343	15.8306	1126	1269	1120	2287	2187	2095	2515	1630	1974	1606	1947	2212	1595	1464	2391	2273	2608	1959
gene-GIB67_000223	JACGCM010000121.1	2014008	2018589	-	GIB67_000223	1134	rna-gnl|WGS:JACGCM|KingUnif42477.1	GO:0003677(DNA binding);GO:0004003(ATP-dependent DNA helicase activity);GO:0005524(ATP binding);GO:0005634(nucleus);GO:0005737(cytoplasm);GO:0006289(nucleotide-excision repair);GO:0006355(regulation of transcription, DNA-templated);GO:0006367(transcription initiation from RNA polymerase II promoter);GO:0008026(ATP-dependent helicase activity);GO:0009411(response to UV);GO:0009636(response to toxi…	03022(Basal transcription factors);03420(Nucleotide excision repair)	K10843	EC:3.6.4.12	PREDICTED: DNA repair helicase XPB1 [Nelumbo nucifera]	NA	2.69638	3.16872	3.901	6.95328	6.54547	7.98344	7.99824	7.42772	6.15184	3.05578	10.9581	8.39302	5.77974	4.28059	7.48428	4.58884	4.94102	6.51195	187	244	269	585	524	661	605	428	432	224	938	653	453	361	578	334	362	510
gene-GIB67_000225	JACGCM010002283.1	1218	2650	+	GIB67_000225	35125	rna-gnl|WGS:JACGCM|KingUnif23176.1	GO:0004497(monooxygenase activity);GO:0044550(secondary metabolite biosynthetic process)	NA	NA	NA	FAD/NAD(P)-binding domain containing protein [Trema orientale]	NA	0	0	0	0	0	0	2.01136	1.1997	3.164	0	0	0	0	1.14507	0.991856	6.08076	5.74905	3.19619	0	0	0	0	0	0	32	15	46	0	0	0	0	20	16	92	88	52
gene-GIB67_000226	JACGCM010002283.1	26512	26895	+	GIB67_000226	35127	rna-gnl|WGS:JACGCM|KingUnif40230.1	GO:0005576(extracellular region)	NA	NA	NA	Leucine-rich repeat extensin-like protein 4 [Vitis vinifera]	NA	0	0.112244	0	0	0	0	0	0	0	0	0	0	0	0	0	0	0	0	0	3	0	0	0	0	0	0	0	0	0	0	0	0	0	0	0	0
gene-GIB67_000227	JACGCM010002283.1	9053	11485	+	GIB67_000227	35126	rna-gnl|WGS:JACGCM|KingUnif06562.1	NA	NA	NA	NA	uncharacterized protein LOC113280537 [Papaver somniferum]	NA	0.19417	0.125779	0	0.011658	0.022625	0	0	0	0.042104	0.075465	0.012687	0	0	0	0.0366	0.053162	0	0.046327	8	6	0	1	2	0	0	0	2	4	1	0	0	0	2	3	0	3
gene-GIB67_000228	JACGCM010002283.1	54014	55407	-	GIB67_000228	35128	rna-gnl|WGS:JACGCM|KingUnif33078.1	GO:0016420(malonyltransferase activity)	00942(Anthocyanin biosynthesis)	K21383	EC:2.3.1.215	hypothetical protein AQUCO_02000006v1 [Aquilegia coerulea]	NA	0.283874	0.116518	0.080317	0	0.086317	0	0	0	0	0.166625	0	0	0	0	1.54508	0.009232	0.14067	0	20	10	6	0	8	0	0	0	0	13	0	0	0	0	121	1	11	0
gene-GIB67_000229	JACGCM010001766.1	12303	12578	+	GIB67_000229	27168	rna-gnl|WGS:JACGCM|KingUnif15810.1	GO:0003674(molecular_function);GO:0005634(nucleus);GO:0008150(biological_process)	NA	NA	NA	uncharacterized protein LOC114188784 [Vigna unguiculata]	NA	0	0.657955	0.162905	21.9277	8.92027	7.73701	0.268956	0.999908	0.193148	0	0.058439	1.18411	0.488292	0.060761	0	0.475094	0.124099	0	0	12	3	404	157	141	5	13	3	0	2	21	9	2	0	8	2	0
gene-GIB67_000231	JACGCM010001187.1	12015	13470	+	GIB67_000231	17360	rna-gnl|WGS:JACGCM|KingUnif33491.1	GO:0005829(cytosol);GO:0008171(O-methyltransferase activity);GO:0008757(S-adenosylmethionine-dependent methyltransferase activity);GO:0019438(aromatic compound biosynthetic process)	00940(Phenylpropanoid biosynthesis)	K13066	EC:2.1.1.68	caffeic acid 3-O-methyltransferase 1 [Cinnamomum micranthum f. kanehirae]	NA	1.25124	1.16095	0.70929	0.897331	0.106854	0.154316	0.325823	0.607107	1.37847	2.80234	0.069253	0.502488	0.457361	0.140851	1.94046	0.984403	0	0.278439	72	74	41	62	8	11	21	29	80	169	5	33	30	10	123	59	0	18
gene-GIB67_000232	JACGCM010001187.1	14852	16167	+	GIB67_000232	17361	rna-gnl|WGS:JACGCM|KingUnif17596.1	GO:0000015(phosphopyruvate hydratase complex);GO:0000287(magnesium ion binding);GO:0004634(phosphopyruvate hydratase activity);GO:0006096(glycolytic process);GO:0021762(substantia nigra development)	00010(Glycolysis / Gluconeogenesis);03018(RNA degradation)	K01689	EC:4.2.1.11	cytosolic enolase 3-like [Papaver somniferum]	NA	0.029101	0.29798	0.081089	0.298796	0.102311	0	0.574282	0	0.034468	0.806939	0.069528	0	0.085681	0.103662	0.282272	0.622774	0.225654	0.226739	2	13	3	14	5	0	23	0	2	31	4	0	4	5	12	24	9	10
gene-GIB67_000233	JACGCM010001187.1	279	4250	-	GIB67_000233	17359	rna-gnl|WGS:JACGCM|KingUnif21177.1	GO:0019745(pentacyclic triterpenoid biosynthetic process);GO:0042300(beta-amyrin synthase activity)	00909(Sesquiterpenoid and triterpenoid biosynthesis)	K15813	EC:5.4.99.39	hypothetical protein BVC80_521g128 [Macleaya cordata]	NA	0.328693	0	0.463533	0.152344	0.501524	0.273732	0.997918	2.06863	0.363104	0	0	0	0.023035	0.012191	0.019144	0.019826	0.022366	0	50	0	69	28	87	49	163	257	55	0	0	0	4	3	4	4	4	0
gene-GIB67_000234	JACGCM010001187.1	21888	28222	-	GIB67_000234	17362	rna-gnl|WGS:JACGCM|KingUnif29078.1	GO:0019745(pentacyclic triterpenoid biosynthetic process);GO:0042300(beta-amyrin synthase activity)	00909(Sesquiterpenoid and triterpenoid biosynthesis)	K15813	EC:5.4.99.39	hypothetical protein BVC80_521g128 [Macleaya cordata]	NA	0.815886	0.31918	1.01457	0.543172	2.54771	1.11474	2.39065	4.47642	1.10748	0.062431	0	0.06314	0.400428	0.154665	0.261852	0.218153	0.348986	0.094388	147	64	181	119	528	239	468	667	201	12	0	13	82	34	53	41	67	20
gene-GIB67_000235	JACGCM010001187.1	34998	37404	-	GIB67_000235	17363	rna-gnl|WGS:JACGCM|KingUnif23742.1	GO:0019745(pentacyclic triterpenoid biosynthetic process);GO:0042300(beta-amyrin synthase activity)	00909(Sesquiterpenoid and triterpenoid biosynthesis)	K15813	EC:5.4.99.39	hypothetical protein BVC80_521g128 [Macleaya cordata]	NA	0.734862	0.22583	1.39241	0.574591	1.58102	1.19518	1.34511	3.64416	0.418243	0.045361	0	0	0.131828	0.033772	0.131843	0.043068	0.06123	0	65	23	122	62	161	126	130	267	38	5	0	0	14	4	13	4	6	0
gene-GIB67_000236	JACGCM010000249.1	37397	41583	+	GIB67_000236	2443	rna-gnl|WGS:JACGCM|KingUnif30676.1	GO:0005515(protein binding);GO:0005524(ATP binding);GO:0005739(mitochondrion);GO:0009507(chloroplast);GO:0009532(plastid stroma);GO:0009536(plastid);GO:0009570(chloroplast stroma);GO:0009658(chloroplast organization);GO:0009941(chloroplast envelope);GO:0016020(membrane);GO:0016887(ATPase activity);GO:0019538(protein metabolic process);GO:0031969(chloroplast membrane);GO:0034214(protein hexameriza…	NA	NA	NA	chaperone protein ClpC2, chloroplastic-like [Cajanus cajan]	NA	0.226663	0.857443	0.07799	0.156738	0.094078	0	0.516661	0.297633	0.518012	0.111279	0	0.22929	0.193322	0.224092	0	0.615364	0.331161	0.456465	19	78	7	16	9	0	46	21	43	10	0	21	18	23	0	53	29	42
gene-GIB67_000237	JACGCM010000249.1	16575	18797	-	GIB67_000237	2442	rna-gnl|WGS:JACGCM|KingUnif20830.1	GO:0071011(precatalytic spliceosome)	03040(Spliceosome)	K12849	NA	pre-mRNA-splicing factor 38-like [Papaver somniferum]	NA	0.761018	0.750279	0.496525	1.3422	1.73483	3.10835	1.5442	0.758855	2.39179	0.879946	1.23842	1.996	2.01531	1.10623	2.21803	1.63654	2.28614	1.0038	28	31	18	59	73	134	61	23	88	34	56	81	83	49	90	62	88	41
gene-GIB67_000238	JACGCM010002394.1	7465	7782	+	GIB67_000238	36874	rna-gnl|WGS:JACGCM|KingUnif11845.1	NA	NA	NA	NA	hypothetical protein BVC80_1731g59 [Macleaya cordata]	NA	0	0	0.149073	0.109474	0	0.147065	0	0.206958	0	0	0	0	0	0	0	0	0	0	0	0	3	3	0	4	0	3	0	0	0	0	0	0	0	0	0	0
gene-GIB67_000239	JACGCM010002394.1	72001	73440	-	GIB67_000239	36877	rna-gnl|WGS:JACGCM|KingUnif11541.1	GO:0009813(flavonoid biosynthetic process);GO:0043231(intracellular membrane-bounded organelle);GO:0052696(flavonoid glucuronidation);GO:0080043(quercetin 3-O-glucosyltransferase activity);GO:0080044(quercetin 7-O-glucosyltransferase activity)	NA	NA	NA	UDP-glycosyltransferase 86A2-like [Durio zibethinus]	NA	2.0103	1.13254	3.28135	41.4304	27.0437	30.5419	13.4086	16.689	10.1478	1.17244	7.00123	8.73751	1.98364	0.657847	7.2752	10.926	7.02632	2.51524	160	100	258	3976	2470	2884	1157	1096	812	98	684	775	178	64	641	905	587	225
gene-GIB67_000240	JACGCM010002394.1	8245	12252	-	GIB67_000240	36875	rna-gnl|WGS:JACGCM|KingUnif07895.1	GO:0005515(protein binding);GO:0005524(ATP binding);GO:0005654(nucleoplasm);GO:0005730(nucleolus);GO:0005794(Golgi apparatus);GO:0005829(cytosol);GO:0005856(cytoskeleton);GO:0005886(plasma membrane);GO:0007049(cell cycle);GO:0009524(phragmoplast);GO:0015031(protein transport);GO:0016787(hydrolase activity);GO:0045732(positive regulation of protein catabolic process);GO:0046686(response to cadmium…	04141(Protein processing in endoplasmic reticulum)	K13525	NA	PREDICTED: cell division cycle protein 48 homolog [Elaeis guineensis]	NA	0.027574	0.068356	0.064391	0.197627	0.185074	0.12192	0	0.133154	0.156865	0	0.057884	0.101154	0.239679	0.120809	0	0	0.068554	0	4	11	9	34	30	21	0	16	23	0	10	16	38	21	0	0	11	0
gene-GIB67_000241	JACGCM010002394.1	20050	20445	-	GIB67_000241	36876	rna-gnl|WGS:JACGCM|KingUnif37609.1	GO:0009813(flavonoid biosynthetic process);GO:0043231(intracellular membrane-bounded organelle);GO:0052696(flavonoid glucuronidation);GO:0080043(quercetin 3-O-glucosyltransferase activity);GO:0080044(quercetin 7-O-glucosyltransferase activity)	NA	NA	NA	hypothetical protein B296_00020153 [Ensete ventricosum]	NA	0	0	0	0	0.16834	0.016944	0	0	0	0	0	0	0	0.13007	0.40441	0	0.117259	0	0	0	0	0	5	1	0	0	0	0	0	0	0	4	10	0	3	0
gene-GIB67_000244	JACGCM010002394.1	105301	116764	-	GIB67_000244	36878	rna-gnl|WGS:JACGCM|KingUnif01947.1	GO:0009507(chloroplast);GO:0009536(plastid);GO:0009706(chloroplast inner membrane);GO:0009941(chloroplast envelope);GO:0010208(pollen wall assembly);GO:0015245(fatty acid transmembrane transporter activity);GO:0015908(fatty acid transport);GO:0016021(integral component of membrane);GO:0055088(lipid homeostasis);GO:0071668(plant-type cell wall assembly);GO:1902001(fatty acid transmembrane transpor…	NA	NA	NA	PREDICTED: protein FATTY ACID EXPORT 1, chloroplastic [Vitis vinifera]	NA	36.3631	27.3712	38.3172	40.7543	39.1475	35.5781	72.5799	70.9611	57.9632	41.3531	38.3188	50.8026	30.7308	48.5924	37.4848	85.4977	67.5268	71.529	2354	1965	2463	3200	2924	2749	5122	3811	3792	2820	3060	3685	2248	3823	2699	5792	4614	5225
gene-GIB67_000245	JACGCM010002394.1	176991	178103	-	GIB67_000245	36885	rna-gnl|WGS:JACGCM|KingUnif19232.1	NA	NA	NA	NA	protein MAINTENANCE OF MERISTEMS-like [Papaver somniferum]	NA	0	0	0	0	0	0	0	0	0.100388	0	0	0	0	0	0	0	0	0	0	0	0	0	0	0	0	0	6	0	0	0	0	0	0	0	0	0
gene-GIB67_000246	JACGCM010002394.1	178255	179645	-	GIB67_000246	36886	rna-gnl|WGS:JACGCM|KingUnif40008.1	NA	NA	NA	NA		NA	0.334388	0.237756	0.259488	0.20441	0	0.450734	0.251183	0.4872	1.42516	0	0	0	0	0	0	0	0	0	12	10	10	9	0	20	10	15	52	0	0	0	0	0	0	0	0	0
gene-GIB67_000247	JACGCM010002394.1	174549	176304	-	GIB67_000247	36884	rna-gnl|WGS:JACGCM|KingUnif25829.1	NA	NA	NA	NA		NA	0	0	0.045307	0	0	0	0	0	0	0	0	0	0	0	0	0	0	0	0	0	2	0	0	0	0	0	0	0	0	0	0	0	0	0	0	0
gene-GIB67_000248	JACGCM010002394.1	159939	160253	-	GIB67_000248	36882	rna-gnl|WGS:JACGCM|KingUnif19631.1	NA	NA	NA	NA	Protein FLX-like [Actinidia chinensis var. chinensis]	NA	0.731221	1.46138	0.269957	0	0.19427	0.285313	0.707325	0.577573	0.88886	0.223748	0.062444	0.057754	1.98543	0	1.07845	0.147223	0	0	13	29	5	0	4	6	14	9	16	5	2	2	39	0	21	3	0	0
gene-GIB67_000249	JACGCM010002394.1	156326	159899	-	GIB67_000249	36881	rna-gnl|WGS:JACGCM|KingUnif06284.1	NA	NA	NA	NA	protein FLX-like 2 isoform X2 [Ananas comosus]	NA	0.540569	1.57978	0	0	0	0	0.757083	0.756234	0.117874	0	0	0	0.391431	0	1.11914	0.246873	0.146387	0	18	59	0	0	0	0	28	21	4	0	0	0	15	0	42	9	6	0
gene-GIB67_000253	JACGCM010002394.1	180465	198854	-	GIB67_000253	36887	rna-gnl|WGS:JACGCM|KingUnif05594.1	GO:0008176(tRNA (guanine-N7-)-methyltransferase activity);GO:0036265(RNA (guanine-N7)-methylation);GO:0043527(tRNA methyltransferase complex)	00010(Glycolysis / Gluconeogenesis);00710(Carbon fixation in photosynthetic organisms)	K00927	EC:2.7.2.3	Phosphoglycerate kinase [Macleaya cordata]	NA	0.550656	1.11017	1.17591	0.928761	1.03181	0.668832	2.11932	1.09729	1.02052	0.58446	0.34028	0.138412	2.6763	0.14633	2.68507	1.05999	0.779483	0.583242	71	158	150	145	153	103	297	117	133	79	54	20	388	23	383	143	106	85
gene-GIB67_000254	JACGCM010002394.1	295786	300328	+	GIB67_000254	36890	rna-gnl|WGS:JACGCM|KingUnif17124.1	GO:0003723(RNA binding);GO:0004519(endonuclease activity);GO:0005739(mitochondrion);GO:0043231(intracellular membrane-bounded organelle);GO:1900864(mitochondrial RNA modification);GO:1900865(chloroplast RNA modification)	NA	NA	NA	hypothetical protein AQUCO_01400070v1 [Aquilegia coerulea]	NA	0.092163	0.218269	0.070921	0.205316	0.63381	0.299985	0.157377	0.766832	0.512287	0.214498	0.837457	0.460345	1.18858	0.082058	0.923957	0.347933	0.341565	0.368088	15	40	12	41	119	58	28	103	84	37	167	84	217	17	166	59	59	68
gene-GIB67_000255	JACGCM010002394.1	309325	312391	+	GIB67_000255	36891	rna-gnl|WGS:JACGCM|KingUnif33000.1	NA	NA	NA	NA		NA	0.157004	0	0	0.027213	0.080034	0	0.061971	0	0.263744	0.016914	0	0	0.052115	0	0	0	0.104955	0	14	0	0	3	8	0	6	0	23	2	0	0	6	0	0	0	10	0
gene-GIB67_000256	JACGCM010002394.1	430158	430589	+	GIB67_000256	36892	rna-gnl|WGS:JACGCM|KingUnif33924.1	GO:0003674(molecular_function);GO:0005739(mitochondrion);GO:0009733(response to auxin)	04075(Plant hormone signal transduction)	K14488	NA	auxin-responsive protein SAUR50-like [Olea europaea var. sylvestris]	NA	0	0	0	0	0	0	0	0	0	0	0	0	1.22002	0.102132	0.490407	0	0	0	0	0	0	0	0	0	0	0	0	0	0	0	33	3	13	0	0	0
gene-GIB67_000257	JACGCM010002394.1	456121	459609	-	GIB67_000257	36895	rna-gnl|WGS:JACGCM|KingUnif25517.1	GO:0005215(transporter activity);GO:0005524(ATP binding);GO:0005886(plasma membrane);GO:0016887(ATPase activity)	NA	NA	NA	PREDICTED: ABC transporter F family member 1 isoform X1 [Nelumbo nucifera]	NA	557.589	428.855	717.79	782.909	767.393	1044.98	504.661	1000.38	662.812	666.608	980.59	932.694	662.517	1056.28	751.917	526.551	554.357	478.443	70727	60346	90435	120472	112346	158221	69802	105294	84979	89102	153480	132584	94970	162888	106099	69912	74245	68501
gene-GIB67_000258	JACGCM010002394.1	436139	436498	-	GIB67_000258	36893	rna-gnl|WGS:JACGCM|KingUnif17745.1	GO:0003674(molecular_function);GO:0009733(response to auxin)	04075(Plant hormone signal transduction)	K14488	NA	PREDICTED: auxin-induced protein 10A5-like [Nelumbo nucifera]	NA	0.100456	0	0	0	0	0	0	0	0	0.301986	0	0	2.32966	0.389856	1.73941	0	0.130262	0.177996	2	0	0	0	0	0	0	0	0	7	0	0	53	10	39	0	3	4
gene-GIB67_000259	JACGCM010002394.1	452618	452963	-	GIB67_000259	36894	rna-gnl|WGS:JACGCM|KingUnif33651.1	GO:0003674(molecular_function);GO:0009733(response to auxin)	04075(Plant hormone signal transduction)	K14488	NA	PREDICTED: auxin-responsive protein SAUR32-like [Lupinus angustifolius]	NA	0	0	0	0	0	0	0	0	0	0.359817	0	0	0	0	0.775039	0	0	0.193633	0	0	0	0	0	0	0	0	0	5	0	0	0	0	10	0	0	3
gene-GIB67_000264	JACGCM010002394.1	608738	611187	-	GIB67_000264	36899	rna-gnl|WGS:JACGCM|KingUnif29890.1	GO:0005737(cytoplasm);GO:0030001(metal ion transport);GO:0046914(transition metal ion binding);GO:0046916(cellular transition metal ion homeostasis)	NA	NA	NA	PREDICTED: heavy metal-associated isoprenylated plant protein 3-like [Nelumbo nucifera]	NA	139.215	56.4769	268.022	103.056	81.446	132.659	317.353	266.816	321.627	71.0127	162.146	206.343	163.706	191.493	251.282	100.354	311.248	146.552	10095	4544	19305	9066	6817	11483	25094	16055	23574	5427	14509	16769	13416	16882	20270	7618	23831	11996
gene-GIB67_000265	JACGCM010002394.1	753458	759236	+	GIB67_000265	36901	rna-gnl|WGS:JACGCM|KingUnif13083.1	GO:0000981(RNA polymerase II transcription factor activity, sequence-specific DNA binding);GO:0005634(nucleus);GO:0006357(regulation of transcription by RNA polymerase II)	NA	NA	NA	PREDICTED: transcription factor-like protein DPB [Nelumbo nucifera]	NA	9.68148	9.0834	10.1908	14.9287	15.7177	14.282	13.5965	15.9981	13.3178	13.3969	17.351	12.0098	12.7972	10.5146	13.19	9.41559	14.7467	7.0648	803	835	839	1501	1503	1413	1229	1100	1116	1170	1774	1115	1199	1059	1216	817	1290	661
gene-GIB67_000266	JACGCM010002394.1	768328	774048	+	GIB67_000266	36902	rna-gnl|WGS:JACGCM|KingUnif41787.1	GO:0004368(glycerol-3-phosphate dehydrogenase activity);GO:0005739(mitochondrion);GO:0005743(mitochondrial inner membrane);GO:0006071(glycerol metabolic process);GO:0006127(glycerophosphate shuttle);GO:0009331(glycerol-3-phosphate dehydrogenase complex);GO:0019563(glycerol catabolic process);GO:0052591(sn-glycerol-3-phosphate:ubiquinone-8 oxidoreductase activity)	00564(Glycerophospholipid metabolism)	K00111	EC:1.1.5.3	FAD-dependent glycerol-3-phosphate dehydrogenase [Macleaya cordata]	NA	9.83149	6.2535	10.1236	12.9016	12.074	12.9271	10.6205	14.0408	16.1523	8.69327	23.5478	16.9509	12.5477	11.8968	10.9983	5.12651	5.40624	13.5024	651	459	666	1036	922	1021	766	771	1080	606	1922	1257	938	957	810	355	378	1009
gene-GIB67_000267	JACGCM010002394.1	780694	788464	+	GIB67_000267	36903	rna-gnl|WGS:JACGCM|KingUnif33611.1	GO:0004368(glycerol-3-phosphate dehydrogenase activity);GO:0005739(mitochondrion);GO:0005743(mitochondrial inner membrane);GO:0006071(glycerol metabolic process);GO:0006127(glycerophosphate shuttle);GO:0009331(glycerol-3-phosphate dehydrogenase complex);GO:0019563(glycerol catabolic process);GO:0052591(sn-glycerol-3-phosphate:ubiquinone-8 oxidoreductase activity)	00564(Glycerophospholipid metabolism)	K00111	EC:1.1.5.3	glycerol-3-phosphate dehydrogenase SDP6, mitochondrial-like protein [Cinnamomum micranthum f. kanehirae]	NA	22.5974	26.887	21.1756	20.1643	19.5379	17.0055	18.664	21.2217	24.7317	23.5796	25.6463	25.217	16.9752	13.9848	16.0831	13.2744	14.452	16.08	1479	1952	1377	1601	1476	1329	1332	1153	1636	1626	2071	1849	1256	1113	1171	910	999	1188
gene-GIB67_000268	JACGCM010002394.1	791007	793869	+	GIB67_000268	36904	rna-gnl|WGS:JACGCM|KingUnif08128.1	GO:0000055(ribosomal large subunit export from nucleus);GO:0003676(nucleic acid binding);GO:0005829(cytosol);GO:0008150(biological_process);GO:0008270(zinc ion binding);GO:0009245(lipid A biosynthetic process)	NA	NA	NA	zinc finger protein 593 [Lactuca sativa]	NA	60.4946	68.7899	59.2529	80.9299	71.5077	51.4647	124.216	121.206	113.543	59.427	86.1737	76.114	77.5359	43.5956	102.376	84.1757	138.48	53.8489	2171	2738	2112	3522	2961	2204	4859	3608	4117	2247	3815	3060	3144	1902	4086	3161	5246	2181
gene-GIB67_000270	JACGCM010002394.1	808503	819561	-	GIB67_000270	36906	rna-gnl|WGS:JACGCM|KingUnif26138.1	GO:0004321(fatty-acyl-CoA synthase activity);GO:0005524(ATP binding);GO:0005777(peroxisome);GO:0009695(jasmonic acid biosynthetic process);GO:0009850(auxin metabolic process);GO:0009851(auxin biosynthetic process);GO:0016207(4-coumarate-CoA ligase activity);GO:0016874(ligase activity);GO:0031408(oxylipin biosynthetic process)	00360(Phenylalanine metabolism);00130(Ubiquinone and other terpenoid-quinone biosynthesis);00940(Phenylpropanoid biosynthesis)	K01904	EC:6.2.1.12	PREDICTED: 4-coumarate--CoA ligase-like 7 [Nelumbo nucifera]	NA	67.5734	81.3789	80.8712	67.435	72.2624	73.234	78.9441	90.6573	64.4127	43.7422	12.6946	39.4338	65.4153	61.8279	43.4863	59.9958	49.4767	66.1423	7629	10192	9069	9236	9416	9869	9718	8493	7350	5204	1769	4989	8346	8486	5462	7090	5898	8429
gene-GIB67_000271	JACGCM010002394.1	794175	799946	-	GIB67_000271	36905	rna-gnl|WGS:JACGCM|KingUnif40695.1	GO:0016021(integral component of membrane);GO:0042626(ATPase activity, coupled to transmembrane movement of substances);GO:0055085(transmembrane transport)	02010(ABC transporters)	K05658	EC:3.6.3.44	hypothetical protein AQUCO_03000072v1 [Aquilegia coerulea]	NA	1.20266	0.806755	0.493595	1.62661	4.18184	5.07639	2.33111	1.33503	2.33204	2.04541	3.42459	2.44969	4.18848	7.91077	7.46622	9.92928	18.3342	7.59119	278	207	114	456	1116	1401	588	256	545	499	977	635	1094	2223	1920	2402	4473	1980
gene-GIB67_000274	JACGCM010002394.1	1033507	1042002	-	GIB67_000274	36910	rna-gnl|WGS:JACGCM|KingUnif21391.1	GO:0000480(endonucleolytic cleavage in 5'-ETS of tricistronic rRNA transcript (SSU-rRNA, 5.8S rRNA, LSU-rRNA));GO:0003723(RNA binding);GO:0003963(RNA-3'-phosphate cyclase activity);GO:0004521(endoribonuclease activity);GO:0005730(nucleolus)	03008(Ribosome biogenesis in eukaryotes)	K11108	NA	RNA 3'-terminal phosphate cyclase-like protein [Actinidia chinensis var. chinensis]	NA	12.0153	11.1311	11.3477	17.0319	24.2217	17.1678	17.9268	20.5332	18.07	13.2114	28.3436	22.8681	23.844	13.4454	34.1014	12.9638	18.5078	16.5526	973	1000	913	1674	2264	1660	1583	1380	1479	1128	2832	2076	2182	1324	3072	1099	1583	1513
gene-GIB67_000275	JACGCM010002394.1	1026530	1027129	-	GIB67_000275	36909	rna-gnl|WGS:JACGCM|KingUnif00331.1	GO:0000480(endonucleolytic cleavage in 5'-ETS of tricistronic rRNA transcript (SSU-rRNA, 5.8S rRNA, LSU-rRNA));GO:0003723(RNA binding);GO:0003963(RNA-3'-phosphate cyclase activity);GO:0004521(endoribonuclease activity);GO:0005730(nucleolus)	03008(Ribosome biogenesis in eukaryotes)	K11108	NA	probable RNA 3'-terminal phosphate cyclase-like protein [Manihot esculenta]	NA	16.2587	12.6192	11.8621	22.4968	24.5132	14.029	18.795	24.2865	20.9912	16.9418	21.6676	23.5378	31.7748	12.24	36.1681	26.1218	30.4262	15.0993	496	427	360	833	863	511	625	615	647	545	816	805	1095	454	1227	834	980	520
gene-GIB67_000279	JACGCM010002394.1	1223789	1224979	+	GIB67_000279	36917	rna-gnl|WGS:JACGCM|KingUnif33702.1	GO:0003723(RNA binding);GO:0004519(endonuclease activity);GO:0005739(mitochondrion);GO:0080156(mitochondrial mRNA modification)	NA	NA	NA	Pentatricopeptide repeat [Macleaya cordata]	NA	0.374157	0.109119	0.254411	0.73898	0.886546	0.583028	1.19459	0.758881	1.52808	0.731791	2.37706	0.493707	1.38744	0.479911	1.85355	1.12414	1.07448	0.404059	25	8	17	59	67	46	86	42	102	51	192	37	103	39	135	77	75	30
gene-GIB67_000280	JACGCM010002394.1	1203584	1222377	+	GIB67_000280	36916	rna-gnl|WGS:JACGCM|KingUnif42362.1	GO:0000145(exocyst);GO:0005618(cell wall);GO:0005634(nucleus);GO:0005829(cytosol);GO:0005856(cytoskeleton);GO:0005886(plasma membrane);GO:0006612(protein targeting to membrane);GO:0006887(exocytosis);GO:0006893(Golgi to plasma membrane transport);GO:0006903(vesicle targeting);GO:0006904(vesicle docking involved in exocytosis);GO:0009506(plasmodesma);GO:0009524(phragmoplast);GO:0009846(pollen germ…	NA	NA	NA	hypothetical protein AQUCO_03000065v1 [Aquilegia coerulea]	NA	13.8248	15.3306	11.2163	16.484	14.5343	17.1345	17.6259	22.0399	19.4054	21.8215	16.6932	15.9769	16.2077	19.2071	17.0396	16.4144	20.3298	19.3387	1857	2284	1496	2685	2253	2747	2581	2456	2634	3088	2766	2404	2460	3136	2545	2307	2882	2931
gene-GIB67_000281	JACGCM010002394.1	1181915	1197485	+	GIB67_000281	36915	rna-gnl|WGS:JACGCM|KingUnif28056.1	GO:0000145(exocyst);GO:0005618(cell wall);GO:0005634(nucleus);GO:0005829(cytosol);GO:0005856(cytoskeleton);GO:0005886(plasma membrane);GO:0006612(protein targeting to membrane);GO:0006887(exocytosis);GO:0006893(Golgi to plasma membrane transport);GO:0006903(vesicle targeting);GO:0006904(vesicle docking involved in exocytosis);GO:0009506(plasmodesma);GO:0009524(phragmoplast);GO:0009846(pollen germ…	NA	NA	NA	hypothetical protein AQUCO_03000065v1 [Aquilegia coerulea]	NA	5.38913	6.05143	4.32297	8.32329	7.69535	10.051	6.72135	9.60199	9.1513	5.155	8.35155	8.42049	6.89407	10.0179	6.97116	4.03984	5.07194	8.83396	556	692	443	1041	915	1236	755	821	953	560	1062	973	803	1255	799	436	552	1028
gene-GIB67_000282	JACGCM010002394.1	1225023	1245527	-	GIB67_000282	36918	rna-gnl|WGS:JACGCM|KingUnif01927.1	GO:0005871(kinesin complex);GO:0007018(microtubule-based movement);GO:0008104(protein localization);GO:0008574(ATP-dependent microtubule motor activity, plus-end-directed);GO:0030705(cytoskeleton-dependent intracellular transport)	04144(Endocytosis)	K10396	NA	Armadillo [Macleaya cordata]	NA	0.241611	0.356756	0.583505	0.964113	0.674565	0.902721	0.666122	1.13461	1.21842	0.109052	0.28763	0.376665	1.40891	0.71917	1.85349	2.08806	1.72546	0.668812	39	63	92	185	123	170	115	149	194	19	56	67	251	138	325	344	287	119
gene-GIB67_000289	JACGCM010002394.1	1520580	1522270	+	GIB67_000289	36927	rna-gnl|WGS:JACGCM|KingUnif09687.1	GO:0003677(DNA binding);GO:0005634(nucleus);GO:0008150(biological_process)	NA	NA	NA	Myb/SANT-like domain [Macleaya cordata]	NA	0	0	0	0	0.0713	0	0.129498	0	0	0	0	0	0	0	0.093548	0	0	0	0	0	0	0	4	0	6	0	0	0	0	0	0	0	5	0	0	0
gene-GIB67_000291	JACGCM010002394.1	1553402	1566741	-	GIB67_000291	36932	rna-gnl|WGS:JACGCM|KingUnif15574.1	GO:0003677(DNA binding);GO:0004003(ATP-dependent DNA helicase activity);GO:0005515(protein binding);GO:0005524(ATP binding);GO:0005634(nucleus);GO:0006281(DNA repair);GO:0006289(nucleotide-excision repair);GO:0006351(transcription, DNA-templated);GO:0006355(regulation of transcription, DNA-templated);GO:0009408(response to heat);GO:0009411(response to UV);GO:0046872(metal ion binding);GO:0051539(…	03022(Basal transcription factors);03420(Nucleotide excision repair)	K10844	EC:3.6.4.12	Xeroderma pigmentosum group D protein [Macleaya cordata]	NA	5.07177	3.66183	4.00957	6.04796	7.26734	5.6715	5.23382	3.87809	5.24918	6.45003	5.24103	4.94805	6.20086	3.13004	8.75176	5.5245	5.57641	4.53207	805	645	633	1165	1332	1075	906	511	843	1079	1027	881	1113	604	1546	918	935	812
gene-GIB67_000292	JACGCM010002394.1	1505540	1509691	-	GIB67_000292	36925	rna-gnl|WGS:JACGCM|KingUnif21934.1	GO:0000455(enzyme-directed rRNA pseudouridine synthesis);GO:0005829(cytosol);GO:0009501(amyloplast);GO:0009507(chloroplast);GO:0009982(pseudouridine synthase activity)	NA	NA	NA	RNA-binding S4 domain [Macleaya cordata]	NA	48.2922	43.8571	56.9099	24.1076	35.8828	32.2252	42.749	36.8432	47.4686	12.5526	11.8724	17.1225	20.7444	7.07303	18.8556	9.76962	13.4152	7.5113	4033	4063	4721	2443	3459	3212	3893	2553	4007	1105	1224	1603	1958	719	1752	854	1183	708
gene-GIB67_000293	JACGCM010002394.1	1519201	1519829	-	GIB67_000293	36926	rna-gnl|WGS:JACGCM|KingUnif25077.1	GO:0003824(catalytic activity);GO:0005794(Golgi apparatus);GO:0006486(protein glycosylation);GO:0016020(membrane);GO:0016021(integral component of membrane);GO:0016757(transferase activity, transferring glycosyl groups)	NA	NA	NA	hypothetical protein AQUCO_00900090v1 [Aquilegia coerulea]	NA	0	0	0.132099	0.544218	0.213887	0.858956	0.346243	0	0	0.165364	0	0.167523	0.129413	0.113898	0.626578	0.146161	0	0.254083	0	0	4	17	7	27	10	0	0	5	0	5	4	4	18	4	0	8
gene-GIB67_000294	JACGCM010002394.1	1550145	1552390	-	GIB67_000294	36931	rna-gnl|WGS:JACGCM|KingUnif15075.1	GO:0000447(endonucleolytic cleavage in ITS1 to separate SSU-rRNA from 5.8S rRNA and LSU-rRNA from tricistronic rRNA transcript (SSU-rRNA, 5.8S rRNA, LSU-rRNA));GO:0000472(endonucleolytic cleavage to generate mature 5'-end of SSU-rRNA from (SSU-rRNA, 5.8S rRNA, LSU-rRNA));GO:0000480(endonucleolytic cleavage in 5'-ETS of tricistronic rRNA transcript (SSU-rRNA, 5.8S rRNA, LSU-rRNA));GO:0003723(RNA b…	NA	NA	NA	RNA recognition motif domain [Macleaya cordata]	NA	18.2046	16.3131	9.47333	7.77216	13.2822	9.521	12.6913	17.7145	15.6165	13.7441	14.8795	12.1487	18.5546	6.39366	19.8748	14.4153	15.2712	13.8351	955	949	494	495	804	596	726	771	828	760	963	714	1099	408	1159	791	846	819
gene-GIB67_000295	JACGCM010002394.1	1543024	1544132	-	GIB67_000295	36930	rna-gnl|WGS:JACGCM|KingUnif23386.1	GO:0000447(endonucleolytic cleavage in ITS1 to separate SSU-rRNA from 5.8S rRNA and LSU-rRNA from tricistronic rRNA transcript (SSU-rRNA, 5.8S rRNA, LSU-rRNA));GO:0000472(endonucleolytic cleavage to generate mature 5'-end of SSU-rRNA from (SSU-rRNA, 5.8S rRNA, LSU-rRNA));GO:0000480(endonucleolytic cleavage in 5'-ETS of tricistronic rRNA transcript (SSU-rRNA, 5.8S rRNA, LSU-rRNA));GO:0003723(RNA b…	NA	NA	NA	PREDICTED: pre-rRNA-processing protein ESF2 [Vitis vinifera]	NA	13.0492	11.1559	6.34836	4.70053	8.01866	4.42252	7.52749	8.26197	7.48565	10.1317	6.27174	5.32141	11.9018	3.43899	9.74941	12.2032	11.7616	7.85029	356	338	172	156	253	144	224	187	207	291	211	163	367	114	296	349	339	242
gene-GIB67_000296	JACGCM010002394.1	1541191	1542180	-	GIB67_000296	36929	rna-gnl|WGS:JACGCM|KingUnif24323.1	NA	NA	NA	NA		NA	0.079023	0.067842	0	0	0	0	0	0	0	0	0	0	0	0	0	0	0	0	4	4	0	0	0	0	0	0	0	0	0	0	0	0	0	0	0	0
gene-GIB67_000297	JACGCM010002394.1	1602598	1608213	-	GIB67_000297	36935	rna-gnl|WGS:JACGCM|KingUnif32275.1	GO:0003674(molecular_function);GO:0008150(biological_process);GO:0009507(chloroplast)	00400(Phenylalanine, tyrosine and tryptophan biosynthesis);00405(Phenazine biosynthesis)	K01657	EC:4.1.3.27	PREDICTED: uncharacterized protein LOC104604520 [Nelumbo nucifera]	NA	47.0228	50.133	63.1772	62.6237	42.5812	56.6805	80.0074	65.6302	61.9876	21.9592	11.3293	33.8408	17.6057	23.076	19.5776	29.6697	30.2818	17.2645	2625	3105	3503	4241	2744	3777	4870	3040	3497	1292	781	2117	1111	1566	1216	1734	1785	1088
gene-GIB67_000298	JACGCM010002394.1	1587844	1592649	-	GIB67_000298	36934	rna-gnl|WGS:JACGCM|KingUnif36525.1	NA	00010(Glycolysis / Gluconeogenesis);00030(Pentose phosphate pathway);00051(Fructose and mannose metabolism);00052(Galactose metabolism);03018(RNA degradation)	K00850	EC:2.7.1.11	hypothetical protein AQUCO_01400253v1 [Aquilegia coerulea]	NA	0.19601	0.071635	0.534577	1.18765	1.69242	0.29856	1.59552	0.924261	1.24131	0.237693	0	0	0.124234	0.21418	0.271663	1.47761	2.46431	0.971386	19	8	50	134	182	34	162	72	117	24	0	0	14	25	29	144	242	102
gene-GIB67_000299	JACGCM010002394.1	1583381	1587384	-	GIB67_000299	36933	rna-gnl|WGS:JACGCM|KingUnif17614.1	NA	NA	NA	NA	Protein NRT1/ PTR family 1.2 [Vitis vinifera]	NA	16.8688	20.2921	9.15578	6.96122	5.85426	4.27708	9.17021	10.9701	14.8307	20.3736	8.37283	6.25215	22.4313	4.86898	8.9566	14.7704	12.8439	19.5517	1040	1388	561	521	417	315	617	562	924	1324	637	432	1563	365	615	953	836	1361
gene-GIB67_000302	JACGCM010002394.1	1877154	1880735	-	GIB67_000302	36938	rna-gnl|WGS:JACGCM|KingUnif31158.1	GO:0005524(ATP binding);GO:0005737(cytoplasm);GO:0005829(cytosol);GO:0006751(glutathione catabolic process);GO:0009506(plasmodesma);GO:0016787(hydrolase activity);GO:0017168(5-oxoprolinase (ATP-hydrolyzing) activity)	00480(Glutathione metabolism)	K01469	EC:3.5.2.9	Hydantoinase/oxoprolinase [Macleaya cordata]	NA	9.08683	8.83454	7.61232	11.0073	9.96439	10.5106	14.0295	16.1254	16.3649	8.16232	13.0048	9.11272	12.3615	7.11894	16.0993	11.983	12.6714	11.7434	1789	1929	1488	2628	2264	2469	3011	2633	3255	1693	3158	2010	2749	1704	3525	2469	2633	2609
gene-GIB67_000303	JACGCM010002394.1	1967465	1972092	+	GIB67_000303	36946	rna-gnl|WGS:JACGCM|KingUnif15045.1	GO:0005886(plasma membrane);GO:0016829(lyase activity);GO:0030570(pectate lyase activity);GO:0031225(anchored component of membrane);GO:0045490(pectin catabolic process);GO:0046872(metal ion binding)	00040(Pentose and glucuronate interconversions)	K01728	EC:4.2.2.2	Pectate lyase/Amb allergen [Macleaya cordata]	NA	1.96588	0.977953	0.785322	0.64312	0.590099	0.278497	2.62864	1.9219	2.12121	2.73817	1.17927	1.12247	22.6382	2.40073	39.9436	16.7804	8.75003	12.8496	185	102	74	74	64	32	269	150	202	271	137	118	2400	274	4167	1648	867	1361
gene-GIB67_000304	JACGCM010002394.1	1973656	1975695	+	GIB67_000304	36947	rna-gnl|WGS:JACGCM|KingUnif25946.1	NA	00520(Amino sugar and nucleotide sugar metabolism)	K12448	EC:5.1.3.5	Aminotransferase-like [Macleaya cordata]	NA	0	0.127328	0.10028	0	0	0	0	0.039	0	0.286086	0	0.035031	0.11208	0	0.246201	0.100733	0.020098	0.035016	0	15	11	0	0	0	0	4	0	31	0	4	13	0	28	11	3	4
gene-GIB67_000305	JACGCM010002394.1	1963399	1965520	+	GIB67_000305	36945	rna-gnl|WGS:JACGCM|KingUnif41420.1	NA	NA	NA	NA	OTU domain-containing protein 6B [Vitis vinifera]	NA	10.055	11.5347	9.28609	6.43872	4.59418	2.54039	15.1056	7.71963	21.6924	10.5039	1.46986	2.74156	11.9604	5.69231	6.81135	8.1052	12.3144	5.69126	526	670	483	409	278	159	862	336	1147	579	95	161	707	362	397	444	680	336
gene-GIB67_000307	JACGCM010002394.1	1961173	1962270	+	GIB67_000307	36944	rna-gnl|WGS:JACGCM|KingUnif26811.1	GO:0008150(biological_process);GO:0009507(chloroplast);GO:0016021(integral component of membrane);GO:0016746(transferase activity, transferring acyl groups)	NA	NA	NA	PREDICTED: uncharacterized protein LOC103975214 [Musa acuminata subsp. malaccensis]	NA	10.4729	12.1473	12.9488	10.5606	10.418	6.0793	11.7455	12.8069	14.8409	11.2502	5.69841	4.96996	12.5393	5.38107	7.14345	8.1113	10.017	6.8401	397	511	488	486	456	276	486	403	569	450	267	212	538	248	302	322	401	293
gene-GIB67_000308	JACGCM010002394.1	1953404	1954015	+	GIB67_000308	36941	rna-gnl|WGS:JACGCM|KingUnif09656.1	NA	NA	NA	NA		NA	0	1.32506	0	2.11525	2.73686	0	0	0	1.95652	0	0	0.372449	1.03612	0.449392	1.07947	0	2.05609	1.16749	0	45	0	78	96	0	0	0	61	0	0	13	36	17	37	0	66	41
gene-GIB67_000310	JACGCM010002394.1	1953489	1954176	-	GIB67_000310	36942	rna-gnl|WGS:JACGCM|KingUnif22031.1	NA	NA	NA	NA		NA	0	0.68745	0	0	1.38904	0	0	0	0.869579	0	0	0	0.884764	0.471592	0	0	1.13934	0	0	16	0	0	33	0	0	0	18	0	0	0	21	12	0	0	25	0
gene-GIB67_000311	JACGCM010002394.1	1956175	1956634	-	GIB67_000311	36943	rna-gnl|WGS:JACGCM|KingUnif21042.1	NA	NA	NA	NA		NA	7.05478	7.59636	5.37586	4.73934	4.37067	3.6705	8.19872	4.23264	9.87598	4.38643	1.03569	2.26155	7.08584	1.72222	3.91765	4.99588	10.6013	4.3513	158	189	120	129	113	98	200	79	224	104	29	57	180	47	98	117	251	110
gene-GIB67_000313	JACGCM010002394.1	2066946	2071586	+	GIB67_000313	36952	rna-gnl|WGS:JACGCM|KingUnif40965.1	GO:0000166(nucleotide binding);GO:0003677(DNA binding);GO:0003729(mRNA binding);GO:0005634(nucleus);GO:0006306(DNA methylation);GO:0006357(regulation of transcription by RNA polymerase II);GO:0006368(transcription elongation from RNA polymerase II promoter);GO:0006397(mRNA processing);GO:0030422(production of siRNA involved in RNA interference);GO:0032044(DSIF complex)	NA	NA	NA	PREDICTED: protein RNA-directed DNA methylation 3 [Nelumbo nucifera]	NA	0.941726	1.9014	1.30255	1.3367	0.624236	1.73583	1.97374	1.19771	1.58081	0.884946	0.848494	0.732712	0.588245	0.224019	0.478625	1.46985	0.56428	1.30602	25	56	34	43	19	55	57	26	42	25	28	22	18	8	14	41	16	39
gene-GIB67_000314	JACGCM010002394.1	2078894	2080792	+	GIB67_000314	36954	rna-gnl|WGS:JACGCM|KingUnif36927.1	GO:0003723(RNA binding);GO:0004519(endonuclease activity);GO:0005739(mitochondrion);GO:0006397(mRNA processing);GO:0008270(zinc ion binding);GO:0009507(chloroplast);GO:0016556(mRNA modification)	NA	NA	NA	Pentatricopeptide repeat [Macleaya cordata]	NA	0	0	0.053915	0.327135	0.300987	0.142516	0.229618	0.091801	0.251384	0.036144	0.513756	0.096484	0.292581	0.133725	0.36743	0.080589	0.144534	0.027402	0	0	6	42	37	18	27	8	27	4	67	12	35	17	43	9	16	4
gene-GIB67_000315	JACGCM010002394.1	2073717	2075053	+	GIB67_000315	36953	rna-gnl|WGS:JACGCM|KingUnif30897.1	GO:0000166(nucleotide binding);GO:0003677(DNA binding);GO:0003729(mRNA binding);GO:0005634(nucleus);GO:0006306(DNA methylation);GO:0006357(regulation of transcription by RNA polymerase II);GO:0006368(transcription elongation from RNA polymerase II promoter);GO:0006397(mRNA processing);GO:0030422(production of siRNA involved in RNA interference);GO:0032044(DSIF complex)	NA	NA	NA	hypothetical protein AQUCO_03800139v1 [Aquilegia coerulea]	NA	3.19195	2.60633	1.80775	2.51529	1.50886	1.94537	4.36862	4.5404	7.48196	1.63464	1.22453	3.6612	4.39982	2.15168	5.80467	11.0108	7.3826	3.09707	140	127	79	134	76	102	208	165	330	76	66	179	217	115	282	503	340	153
gene-GIB67_000316	JACGCM010002394.1	2002782	2003866	-	GIB67_000316	36948	rna-gnl|WGS:JACGCM|KingUnif12996.1	GO:0000981(RNA polymerase II transcription factor activity, sequence-specific DNA binding);GO:0001135(transcription factor activity, RNA polymerase II transcription factor recruiting);GO:0003677(DNA binding);GO:0003700(DNA binding transcription factor activity);GO:0005634(nucleus);GO:0006351(transcription, DNA-templated);GO:0006355(regulation of transcription, DNA-templated);GO:0006357(regulation…	NA	NA	NA	SANT/Myb domain [Macleaya cordata]	NA	0.438148	1.12306	0.507821	0.456135	0.790398	0.232621	0	0.237532	0.250011	0.262556	0	0.153594	0	0.210322	0.211898	0	0.109419	0.222108	18	50	21	23	37	12	0	8	11	12	0	7	0	11	10	0	5	11
gene-GIB67_000317	JACGCM010002394.1	2064136	2065895	-	GIB67_000317	36951	rna-gnl|WGS:JACGCM|KingUnif28759.1	GO:0000027(ribosomal large subunit assembly);GO:0003735(structural constituent of ribosome);GO:0006412(translation);GO:0022625(cytosolic large ribosomal subunit)	03010(Ribosome)	K02925	NA	uncharacterized protein A4U43_C10F18060 [Asparagus officinalis]	NA	0	0	0	0	0	0	0	0	0	0	0	0	0	0	0	0	0	0.161408	0	0	0	0	0	0	0	0	0	0	0	0	0	0	0	0	0	8
gene-GIB67_000318	JACGCM010002394.1	2021822	2024237	-	GIB67_000318	36949	rna-gnl|WGS:JACGCM|KingUnif25276.1	GO:0003674(molecular_function);GO:0008150(biological_process);GO:0009941(chloroplast envelope)	NA	NA	NA	uncharacterized protein LOC113314234 [Papaver somniferum]	NA	12.7276	12.9545	17.7303	31.9211	39.9537	34.9025	23.6321	19.8078	17.3755	13.5726	11.9304	25.345	23.6558	10.9852	22.43	19.7249	14.4724	17.6372	315	356	436	958	1140	1030	638	407	435	354	364	703	661	331	617	511	378	493
gene-GIB67_000319	JACGCM010002394.1	2158393	2158620	+	GIB67_000319	36957	rna-gnl|WGS:JACGCM|KingUnif19809.1	GO:0005739(mitochondrion);GO:0005746(mitochondrial respiratory chain);GO:0016021(integral component of membrane)	NA	NA	NA	Cytochrome c oxidase subunit Vc [Macleaya cordata]	NA	0	0	0	0	0	0.099883	0	0	0	0	0	0	0	0	0	0	0	0	0	0	0	0	0	2	0	0	0	0	0	0	0	0	0	0	0	0
gene-GIB67_000321	JACGCM010002394.1	2113919	2115618	-	GIB67_000321	36955	rna-gnl|WGS:JACGCM|KingUnif26148.1	GO:0003677(DNA binding);GO:0005634(nucleus);GO:0008150(biological_process)	NA	NA	NA	uncharacterized protein LOC105637536 isoform X1 [Jatropha curcas]	NA	0	0	0	0	0	0	0	0	0	0	0	0.082918	0	0	0	0	0	0	0	0	0	0	0	0	0	0	0	0	0	4	0	0	0	0	0	0
gene-GIB67_000322	JACGCM010002394.1	2166243	2167319	-	GIB67_000322	36959	rna-gnl|WGS:JACGCM|KingUnif13333.1	GO:0004674(protein serine/threonine kinase activity);GO:0005886(plasma membrane);GO:0006468(protein phosphorylation);GO:0006952(defense response);GO:0009506(plasmodesma)	NA	NA	NA	unnamed protein product, partial [Vitis vinifera]	NA	0	0	0	0	0	0	0	0	0	0	0	0	0	0	0	0.252631	0	0	0	0	0	0	0	0	0	0	0	0	0	0	0	0	0	10	0	0
gene-GIB67_000324	JACGCM010002394.1	2237763	2239061	+	GIB67_000324	36961	rna-gnl|WGS:JACGCM|KingUnif40088.1	GO:0000159(protein phosphatase type 2A complex);GO:0005515(protein binding);GO:0005634(nucleus);GO:0005737(cytoplasm);GO:0007165(signal transduction);GO:0009742(brassinosteroid mediated signaling pathway);GO:0019888(protein phosphatase regulator activity);GO:0042325(regulation of phosphorylation)	03015(mRNA surveillance pathway)	K11584	NA	Protein phosphatase 2A [Macleaya cordata]	NA	40.7335	53.1836	29.2017	7.04386	3.80048	4.82899	15.1243	26.5773	23.263	35.0094	4.88414	2.45853	30.1615	22.6915	3.80939	10.2222	12.69	38.4525	2907	4211	2070	610	314	412	1177	1574	1678	2633	431	197	2433	1969	303	764	957	3098
gene-GIB67_000325	JACGCM010002394.1	2244239	2244637	+	GIB67_000325	36962	rna-gnl|WGS:JACGCM|KingUnif29822.1	GO:0000159(protein phosphatase type 2A complex);GO:0005515(protein binding);GO:0005634(nucleus);GO:0005737(cytoplasm);GO:0007165(signal transduction);GO:0009742(brassinosteroid mediated signaling pathway);GO:0019888(protein phosphatase regulator activity)	03015(mRNA surveillance pathway)	K11584	NA	Protein phosphatase 2A [Cinnamomum micranthum f. kanehirae]	NA	84.1063	138.112	70.2258	14.2991	9.51827	7.73788	29.6358	43.4321	52.9108	93.2666	7.91186	6.29403	32.79	31.6358	9.54287	29.0025	37.6168	67.2383	1428	2601	1185	295	187	157	549	612	908	1669	166	120	630	653	181	516	675	1289
gene-GIB67_000327	JACGCM010002394.1	2384795	2385304	-	GIB67_000327	36963	rna-gnl|WGS:JACGCM|KingUnif42345.1	NA	NA	NA	NA		NA	1.16621	1.09662	1.11212	0	2.02804	0.869377	0.572749	0.475136	1.82733	0.699974	0	0	0.353585	0.203537	0.437431	0.111414	0.774283	0	27	28	25	0	53	24	15	9	42	17	0	0	9	6	11	3	19	0
gene-GIB67_000328	JACGCM010002394.1	2388358	2391213	-	GIB67_000328	36965	rna-gnl|WGS:JACGCM|KingUnif35170.1	GO:0005576(extracellular region);GO:0008150(biological_process);GO:0016874(ligase activity)	NA	NA	NA	unnamed protein product, partial [Vitis vinifera]	NA	0	0.154219	0.857351	1.2443	1.44674	0.637385	2.20831	1.32568	4.32887	0.419409	0	0.342551	0.300617	1.06957	0.233812	2.053	1.33709	1.69097	0	7	33	58	65	30	93	43	168	17	0	15	14	50	10	83	55	74
gene-GIB67_000329	JACGCM010002394.1	2387509	2388075	-	GIB67_000329	36964	rna-gnl|WGS:JACGCM|KingUnif01982.1	NA	NA	NA	NA	hypothetical protein AQUCO_00700625v1 [Aquilegia coerulea]	NA	0.288088	1.32431	0.948986	0.853225	0.852666	0.384793	2.91205	1.11119	4.90804	0.94	0.017345	0.947665	0.724235	0.855607	0.547575	2.90929	2.77308	1.48852	9	46	30	33	31	15	99	29	155	31	1	34	26	33	19	95	92	53
gene-GIB67_000330	JACGCM010002394.1	2398278	2398957	-	GIB67_000330	36966	rna-gnl|WGS:JACGCM|KingUnif07846.1	NA	NA	NA	NA		NA	17.2805	32.2473	8.4861	5.46071	4.79938	4.73415	9.55179	9.8168	10.0672	16.2749	4.59711	4.87807	14.8347	4.28904	4.0111	10.0236	6.75463	15.0676	525	1085	256	201	168	172	316	248	309	521	173	166	509	159	136	319	217	516
gene-GIB67_000334	JACGCM010002394.1	2669361	2674901	-	GIB67_000334	36973	rna-gnl|WGS:JACGCM|KingUnif19708.1	GO:0009507(chloroplast)	NA	NA	NA	PREDICTED: uncharacterized protein ycf45 [Nelumbo nucifera]	NA	38.0369	35.2925	47.0723	656.66	266.762	557.142	63.7272	61.4095	72.6613	7.86679	16.767	46.3373	5.73594	2.76815	8.23487	10.1586	11.7484	3.46856	4990	5137	6134	104502	40390	87243	9116	6685	9635	1088	2715	6813	851	442	1202	1395	1628	514
gene-GIB67_000335	JACGCM010002394.1	2601211	2605861	-	GIB67_000335	36972	rna-gnl|WGS:JACGCM|KingUnif18878.1	GO:0000288(nuclear-transcribed mRNA catabolic process, deadenylation-dependent decay);GO:0000932(P-body);GO:0017148(negative regulation of translation);GO:0030015(CCR4-NOT core complex)	03018(RNA degradation)	K12604	NA	hypothetical protein AQUCO_01300751v1 [Aquilegia coerulea]	NA	4.78401	6.47485	4.32367	8.16142	6.44547	3.67823	19.1598	8.81297	26.1469	7.1292	1.42495	4.86056	9.45876	3.32643	6.73671	11.3966	12.9874	6.06009	452	679	406	935	703	415	1973	691	2496	710	167	515	1010	382	708	1127	1295	646
gene-GIB67_000336	JACGCM010002394.1	2588701	2590485	-	GIB67_000336	36970	rna-gnl|WGS:JACGCM|KingUnif29830.1	GO:0002239(response to oomycetes);GO:0003674(molecular_function);GO:0009506(plasmodesma);GO:0009507(chloroplast);GO:0016021(integral component of membrane);GO:0055085(transmembrane transport)	NA	NA	NA	Nodulin-like [Macleaya cordata]	NA	3.93072	1.55139	7.93894	323.046	292.57	604.68	47.3533	41.3649	30.6958	4.04139	170.735	372.503	16.2336	39.0076	82.3659	1.05286	7.14322	1.20934	386	169	774	38429	33112	70777	5064	3366	3043	418	20659	40936	1799	4651	8985	109	740	134
gene-GIB67_000337	JACGCM010002394.1	2583141	2584830	-	GIB67_000337	36969	rna-gnl|WGS:JACGCM|KingUnif37502.1	GO:0002239(response to oomycetes);GO:0003674(molecular_function);GO:0009506(plasmodesma);GO:0009507(chloroplast);GO:0016021(integral component of membrane);GO:0055085(transmembrane transport)	NA	NA	NA	Nodulin-like [Macleaya cordata]	NA	0.923449	0.074536	2.14503	3.60779	2.44383	2.70097	3.33746	4.8035	4.15537	0.346676	0	2.03649	0.171564	0	0.055747	0.432257	0	0.141142	70	7	160	328	212	242	273	299	315	28	0	171	15	0	5	34	0	12
gene-GIB67_000338	JACGCM010002394.1	2753821	2755173	-	GIB67_000338	36975	rna-gnl|WGS:JACGCM|KingUnif26909.1	GO:0000145(exocyst);GO:0001927(exocyst assembly);GO:0051601(exocyst localization)	NA	NA	NA	exocyst complex component EXO84C-like isoform X2 [Papaver somniferum]	NA	0	0	0	0.021401	0.04987	0	0.245102	0.149889	0.718596	0	0.042895	0	0	0	0.10674	0	0	0	0	0	0	2	4	0	18	9	49	0	4	0	0	0	8	0	0	0
gene-GIB67_000340	JACGCM010002394.1	2797050	2798841	+	GIB67_000340	36976	rna-gnl|WGS:JACGCM|KingUnif20647.1	GO:0000139(Golgi membrane);GO:0005794(Golgi apparatus);GO:0005886(plasma membrane);GO:0006486(protein glycosylation);GO:0009834(plant-type secondary cell wall biogenesis);GO:0010417(glucuronoxylan biosynthetic process);GO:0015020(glucuronosyltransferase activity);GO:0016021(integral component of membrane);GO:0016740(transferase activity);GO:0071555(cell wall organization)	NA	NA	NA	PREDICTED: probable glucuronoxylan glucuronosyltransferase IRX7 [Nelumbo nucifera]	NA	0	0	0	0	0	0	0	0	0	0	0	0.031733	0	0.153278	0.283878	1.21272	2.02104	0.969442	0	0	0	0	0	0	0	0	0	0	0	3	0	14	24	96	161	83
gene-GIB67_000341	JACGCM010002394.1	2863154	2864937	+	GIB67_000341	36978	rna-gnl|WGS:JACGCM|KingUnif36042.1	GO:0004197(cysteine-type endopeptidase activity);GO:0005615(extracellular space);GO:0005764(lysosome);GO:0051603(proteolysis involved in cellular protein catabolic process)	NA	NA	NA	probable cysteine protease RD19D [Ziziphus jujuba]	NA	0	0.141104	0	0	0.078288	0	0	0	0.208591	0.123509	0.264937	0	18.5715	0.737626	14.0118	0.050618	0.060175	0.080636	0	10	0	0	6	0	0	0	13	8	20	0	1273	55	946	4	4	6
gene-GIB67_000342	JACGCM010002394.1	2804527	2808808	-	GIB67_000342	36977	rna-gnl|WGS:JACGCM|KingUnif35695.1	GO:0005634(nucleus)	NA	NA	NA	hypothetical protein BVC80_1835g390 [Macleaya cordata]	NA	12.6015	16.7396	6.61034	9.63547	14.9377	8.69637	7.2292	11.4223	15.416	11.8418	5.42121	2.75609	4.40969	2.34559	3.93944	20.8469	17.375	10.7884	1220	1797	636	1131	1668	1005	763	917	1508	1208	648	299	483	276	424	2111	1775	1179
gene-GIB67_000343	JACGCM010002394.1	2876923	2879537	-	GIB67_000343	36979	rna-gnl|WGS:JACGCM|KingUnif29722.1	GO:0003674(molecular_function);GO:0008150(biological_process);GO:0016021(integral component of membrane)	NA	NA	NA	uncharacterized protein LOC111311021 [Durio zibethinus]	NA	44.4911	44.4125	49.8681	54.2457	45.4292	38.0659	69.4622	73.5837	69.7901	56.4948	43.9271	39.8398	32.679	47.1024	31.9656	69.2925	51.4458	48.3488	1760	1949	1960	2603	2074	1798	2996	2416	2791	2355	2144	1766	1461	2265	1407	2869	2149	2159
gene-GIB67_000344	JACGCM010002394.1	2959934	2973011	+	GIB67_000344	36981	rna-gnl|WGS:JACGCM|KingUnif42634.1	GO:0000815(ESCRT III complex);GO:0005634(nucleus);GO:0005737(cytoplasm);GO:0007034(vacuolar transport);GO:0015031(protein transport);GO:0016192(vesicle-mediated transport)	04144(Endocytosis)	K12193	NA	Vacuolar protein sorting-associated protein [Actinidia chinensis var. chinensis]	NA	62.3671	47.3482	43.8727	57.3774	40.5774	36.8823	55.0052	69.2598	55.9742	68.1798	41.0432	43.522	44.3282	33.0385	30.155	50.4917	54.7843	36.1544	4557	3838	3184	5086	3422	3217	4383	4199	4134	5250	3701	3564	3661	2935	2451	3862	4227	2982
gene-GIB67_000345	JACGCM010002394.1	2888868	2890977	-	GIB67_000345	36980	rna-gnl|WGS:JACGCM|KingUnif05874.1	GO:0004553(hydrolase activity, hydrolyzing O-glycosyl compounds);GO:0005576(extracellular region);GO:0005618(cell wall);GO:0005975(carbohydrate metabolic process);GO:0010411(xyloglucan metabolic process);GO:0016762(xyloglucan:xyloglucosyl transferase activity);GO:0016798(hydrolase activity, acting on glycosyl bonds);GO:0016998(cell wall macromolecule catabolic process);GO:0042546(cell wall biogen…	NA	NA	NA	Glycoside hydrolase [Macleaya cordata]	NA	2.49213	1.09889	0	0	0.249737	0	0.323942	0.098492	0.313389	7.39367	0	0	12.4914	16.7307	49.2461	117.366	12.82	39.3644	122	60	0	0	15	0	18	4	16	379	0	0	687	989	2664	5973	659	2161
gene-GIB67_000346	JACGCM010002394.1	3010192	3014556	+	GIB67_000346	36983	rna-gnl|WGS:JACGCM|KingUnif23255.1	GO:0004185(serine-type carboxypeptidase activity);GO:0005773(vacuole);GO:0051603(proteolysis involved in cellular protein catabolic process)	NA	NA	NA	Peptidase S10 [Macleaya cordata]	NA	171.25	131.214	187.361	126.826	117.463	131.288	128.988	136.651	164.532	113.17	89.4769	105.202	64.4211	45.4415	61.7743	69.6776	68.7009	81.9912	11826	10052	12851	10625	9362	10822	9713	7830	11484	8235	7625	8142	5028	3815	4746	5037	5009	6391
gene-GIB67_000347	JACGCM010002394.1	3075801	3077279	+	GIB67_000347	36985	rna-gnl|WGS:JACGCM|KingUnif33934.1	GO:0003723(RNA binding);GO:0004519(endonuclease activity);GO:0005739(mitochondrion);GO:0009451(RNA modification);GO:0009507(chloroplast)	NA	NA	NA	Pentatricopeptide repeat [Macleaya cordata]	NA	0	0.044083	0.079305	0.045453	0.030854	0.081939	0.031002	0.059529	0.327316	0.028655	0.27849	0	0.262981	0.112172	0.463068	0.042487	0.206716	0.095375	0	4	7	5	3	8	3	5	27	3	28	0	25	12	42	4	18	9
gene-GIB67_000348	JACGCM010002394.1	3114485	3118685	+	GIB67_000348	36989	rna-gnl|WGS:JACGCM|KingUnif21360.1	GO:0003729(mRNA binding);GO:0003924(GTPase activity);GO:0005525(GTP binding);GO:0005737(cytoplasm);GO:0005786(signal recognition particle, endoplasmic reticulum targeting);GO:0005829(cytosol);GO:0006614(SRP-dependent cotranslational protein targeting to membrane);GO:0006617(SRP-dependent cotranslational protein targeting to membrane, signal sequence recognition);GO:0008312(7S RNA binding)	03060(Protein export)	K03106	EC:3.6.5.4	hypothetical protein LR48_Vigan406s009100 [Vigna angularis]	NA	0.231155	0.210762	0.162905	0.288944	0.171714	0.052699	0.558634	0.371963	1.46065	0	0.083071	0.459189	1.34965	0.510248	0.575861	0.181012	0.353335	0.340085	17	17	12	25	14	5	43	22	104	0	8	37	108	44	46	14	27	28
gene-GIB67_000349	JACGCM010002394.1	3083917	3088536	+	GIB67_000349	36987	rna-gnl|WGS:JACGCM|KingUnif11773.1	GO:0000103(sulfate assimilation);GO:0005737(cytoplasm);GO:0006457(protein folding);GO:0015035(protein disulfide oxidoreductase activity);GO:0016671(oxidoreductase activity, acting on a sulfur group of donors, disulfide as acceptor);GO:0034599(cellular response to oxidative stress);GO:0045454(cell redox homeostasis);GO:0055114(oxidation-reduction process)	NA	NA	NA	thioredoxin-like 3-3 [Papaver somniferum]	NA	25.2702	22.2775	12.2987	16.8368	19.6302	12.4722	23.8133	19.6582	23.7398	19.4302	16.481	14.3042	32.8237	11.736	23.3271	31.8216	33.9088	28.6958	944	924	457	763	847	557	970	610	897	765	760	599	1386	533	970	1245	1338	1210
gene-GIB67_000350	JACGCM010002394.1	3078439	3080910	-	GIB67_000350	36986	rna-gnl|WGS:JACGCM|KingUnif00343.1	GO:0003674(molecular_function);GO:0009507(chloroplast);GO:0009555(pollen development)	NA	NA	NA	hypothetical protein TanjilG_32823 [Lupinus angustifolius]	NA	14.7267	21.7279	14.2907	7.98923	8.56971	6.7275	20.4247	14.09	22.0114	4.97903	1.38392	4.83425	5.79472	0.417475	2.37787	3.42733	5.08348	2.47395	702	1149	677	462	472	383	1061	557	1060	250	82	259	312	25	126	171	256	133
gene-GIB67_000351	JACGCM010002394.1	3163862	3172472	-	GIB67_000351	36991	rna-gnl|WGS:JACGCM|KingUnif32603.1	GO:0003677(DNA binding);GO:0005739(mitochondrion);GO:0006351(transcription, DNA-templated);GO:0006355(regulation of transcription, DNA-templated);GO:0008131(primary amine oxidase activity);GO:0009911(positive regulation of flower development);GO:0010228(vegetative to reproductive phase transition of meristem);GO:0016491(oxidoreductase activity);GO:0016575(histone deacetylation);GO:0055114(oxidati…	NA	NA	NA	Amine oxidase [Macleaya cordata]	NA	4.6167	4.20764	5.6322	5.1205	4.50782	4.57837	5.62025	8.36297	7.97393	5.23388	5.32165	6.3782	11.5024	10.4713	15.5381	5.41755	4.66198	3.09773	1015	1026	1229	1365	1143	1201	1347	1525	1771	1212	1443	1571	2856	2797	3798	1246	1082	769
gene-GIB67_000352	JACGCM010002394.1	3015727	3016257	-	GIB67_000352	36984	rna-gnl|WGS:JACGCM|KingUnif21943.1	GO:0003674(molecular_function);GO:0005575(cellular_component);GO:0008150(biological_process)	NA	NA	NA	PREDICTED: uncharacterized protein LOC104604530 [Nelumbo nucifera]	NA	0	0.353909	0	0	1.60891	0.505679	0.670398	0.13965	0.114076	0	1.12506	0.768049	1.46819	0.430581	4.28386	0.449983	0.709279	0.590436	0	10	0	0	43	14	17	3	3	0	33	20	39	13	111	11	18	16
gene-GIB67_000353	JACGCM010002394.1	3088884	3090567	-	GIB67_000353	36988	rna-gnl|WGS:JACGCM|KingUnif39277.1	GO:0004478(methionine adenosyltransferase activity);GO:0005829(cytosol)	00270(Cysteine and methionine metabolism)	K00789	EC:2.5.1.6	PREDICTED: S-adenosylmethionine synthase 1 isoform X2 [Vitis vinifera]	NA	7.32251	9.24115	7.99089	28.4212	30.9145	41.0769	40.0997	87.8887	49.3534	13.857	7.60205	22.1901	32.3983	87.3824	23.0487	8.24677	22.1712	13.0344	219	306	237	1029	1065	1463	1305	2176	1489	436	280	742	1093	3169	765	258	699	439
gene-GIB67_000355	JACGCM010002394.1	3116048	3120964	-	GIB67_000355	36990	rna-gnl|WGS:JACGCM|KingUnif03272.1	NA	NA	NA	NA		NA	0.859725	0.908791	0.710454	0.50035	0	0.969282	1.19828	1.49538	2.7597	0.696696	0.718193	0	3.18641	1.30576	1.79379	0.91639	1.50007	0.985934	29	34	24	21	0	39	44	42	93	25	30	0	120	53	67	32	53	37
gene-GIB67_000356	JACGCM010002255.1	6172	7324	+	GIB67_000356	34744	rna-gnl|WGS:JACGCM|KingUnif22079.1	GO:0004722(protein serine/threonine phosphatase activity);GO:0005886(plasma membrane);GO:0006470(protein dephosphorylation);GO:0046872(metal ion binding)	NA	NA	NA	probable protein phosphatase 2C 15 [Herrania umbratica]	NA	0	0.171962	0	4.54359	4.84296	4.49529	0.166538	0.950102	0	0	4.04116	3.67907	5.82159	11.8158	3.12756	0	0	0.043315	0	6	0	169	171	164	6	25	0	0	153	126	201	439	107	0	0	2
gene-GIB67_000357	JACGCM010002255.1	3732	4052	+	GIB67_000357	34743	rna-gnl|WGS:JACGCM|KingUnif38081.1	NA	NA	NA	NA	ribonuclease H, partial [Trifolium pratense]	NA	0	0	0	0.355895	0	0.33699	0.055126	0.150351	0.007481	0	0.156868	0.28607	0.400102	0.097022	0	0	0	0	0	0	0	8	0	8	2	3	1	0	4	6	8	3	0	0	0	0
gene-GIB67_000358	JACGCM010002255.1	9403	12504	+	GIB67_000358	34745	rna-gnl|WGS:JACGCM|KingUnif17646.1	GO:0004843(thiol-dependent ubiquitin-specific protease activity);GO:0005516(calmodulin binding);GO:0005634(nucleus);GO:0006511(ubiquitin-dependent protein catabolic process);GO:0009506(plasmodesma);GO:0016579(protein deubiquitination);GO:0036459(thiol-dependent ubiquitinyl hydrolase activity)	NA	NA	NA	ubiquitin carboxyl-terminal hydrolase 6 isoform X2 [Prunus persica]	NA	4.94466	9.70709	1.25504	2.62232	4.92516	2.96591	4.76322	3.90888	4.88198	4.05476	1.81557	2.20981	4.57687	4.6584	2.38411	2.09061	1.20441	1.68293	187	406	47	120	215	134	196	123	186	162	85	94	195	214	100	83	48	72
gene-GIB67_000360	JACGCM010002218.1	52010	62434	+	GIB67_000360	34032	rna-gnl|WGS:JACGCM|KingUnif33508.1	GO:0005634(nucleus);GO:0008150(biological_process);GO:0046872(metal ion binding)	NA	NA	NA	Yippee/Mis18 [Macleaya cordata]	NA	5.28901	1.78425	11.504	28.9697	29.4916	36.3595	10.4683	15.345	12.4486	12.1105	141.188	105.857	94.7165	83.2181	66.9558	11.8632	20.4067	16.7022	948	355	2048	6298	6100	7778	2046	2282	2255	2287	31220	21259	19182	18130	13348	2226	3862	3379
gene-GIB67_000361	JACGCM010002218.1	52950	53651	-	GIB67_000361	34033	rna-gnl|WGS:JACGCM|KingUnif04301.1	GO:0003700(DNA binding transcription factor activity)	NA	NA	NA	PREDICTED: ethylene-responsive transcription factor 4-like [Nelumbo nucifera]	NA	0	0	0	0	6.18221	0	0	0	0	0	0.326682	2.2904	1.1239	0	0	0	0	0	0	0	0	0	276	0	0	0	0	0	16	99	49	0	0	0	0	0
gene-GIB67_000362	JACGCM010002218.1	136059	139960	+	GIB67_000362	34037	rna-gnl|WGS:JACGCM|KingUnif09860.1	NA	NA	NA	NA	PREDICTED: uncharacterized protein DDB_G0287625 [Nelumbo nucifera]	NA	4.72666	4.98181	3.49202	6.27428	5.6322	5.42815	0.975579	3.6377	1.3106	4.59751	3.11213	3.9227	5.49962	3.00959	5.45864	0.419239	1.6263	0.172856	657	768	482	1058	904	901	148	420	185	674	534	611	864	509	844	61	239	28
gene-GIB67_000363	JACGCM010002218.1	99569	100039	-	GIB67_000363	34034	rna-gnl|WGS:JACGCM|KingUnif12077.1	GO:0003677(DNA binding);GO:0003700(DNA binding transcription factor activity);GO:0005515(protein binding);GO:0005622(intracellular);GO:0005634(nucleus);GO:0006351(transcription, DNA-templated);GO:0006355(regulation of transcription, DNA-templated);GO:0006952(defense response);GO:0009873(ethylene-activated signaling pathway)	NA	NA	NA	ethylene-responsive transcription factor 12 [Sesamum indicum]	NA	0.650326	0.073859	0.262515	0.231083	0	0.12131	1.44798	1.65378	2.03779	0.295368	4.19038	0.074031	152.49	33.5911	42.7468	5.30362	16.1946	3.88878	17	3	7	8	0	4	41	36	54	9	134	3	4459	1057	1231	144	443	114
gene-GIB67_000364	JACGCM010002218.1	123062	127572	-	GIB67_000364	34036	rna-gnl|WGS:JACGCM|KingUnif11340.1	GO:0005768(endosome);GO:0005794(Golgi apparatus);GO:0005802(trans-Golgi network);GO:0005886(plasma membrane);GO:0007165(signal transduction)	NA	NA	NA	hypothetical protein AQUCO_03600074v1 [Aquilegia coerulea]	NA	0.721838	0.296412	0.376005	0.337295	0.509195	0.44094	1.46334	1.01974	1.25467	0.904243	0.640416	0.225947	3.30608	0.894219	3.45428	2.11323	1.29864	2.61008	106	49	55	60	86	77	233	124	186	140	116	37	546	159	562	323	201	431
gene-GIB67_000365	JACGCM010002218.1	118640	119115	-	GIB67_000365	34035	rna-gnl|WGS:JACGCM|KingUnif04316.1	GO:0005768(endosome);GO:0005794(Golgi apparatus);GO:0005802(trans-Golgi network);GO:0005886(plasma membrane);GO:0007165(signal transduction)	NA	NA	NA	putative LRR receptor-like serine/threonine-protein kinase [Cinnamomum micranthum f. kanehirae]	NA	3.0255	0.51773	1.1234	0.600882	0.430995	1.21262	4.00065	4.09598	1.72132	1.19649	1.27886	0	6.74082	1.67884	7.62345	4.70793	2.33288	6.92422	51	10	19	13	9	25	73	57	29	21	27	0	127	34	142	83	42	131
gene-GIB67_000366	JACGCM010002218.1	276645	283712	+	GIB67_000366	34043	rna-gnl|WGS:JACGCM|KingUnif20772.1	GO:0000783(nuclear telomere cap complex);GO:0003691(double-stranded telomeric DNA binding);GO:0031627(telomeric loop formation)	NA	NA	NA	PREDICTED: telomere repeat-binding protein 5 [Nelumbo nucifera]	NA	4.92202	4.69614	4.25814	5.9889	5.46285	3.40681	8.77807	5.21743	10.9532	4.88882	2.48645	3.38311	7.08562	3.36734	7.46748	8.77685	9.81915	5.46537	498	527	428	735	638	412	969	438	1120	522	311	384	810	415	841	930	1049	624
gene-GIB67_000367	JACGCM010002218.1	304963	309494	+	GIB67_000367	34044	rna-gnl|WGS:JACGCM|KingUnif11166.1	GO:0003674(molecular_function);GO:0005575(cellular_component);GO:0008150(biological_process)	04120(Ubiquitin mediated proteolysis)	K04706	NA	Ribonuclease H domain [Macleaya cordata]	NA	0.071896	0.066765	0	0.140877	0.200031	0	0.20308	0.238826	0.46161	0	0	0.097273	0.128296	0	0	0	0	0	6	6	0	14	19	0	18	16	38	0	0	9	12	0	0	0	0	0
gene-GIB67_000368	JACGCM010002218.1	198600	199984	+	GIB67_000368	34040	rna-gnl|WGS:JACGCM|KingUnif35503.1	NA	NA	NA	NA		NA	0	0.422238	0	0.053678	0	0	0	0	0	0.065658	0	0.300764	0.243909	0	0	0	0.311171	0	0	17	0	3	0	0	0	0	0	3	0	13	10	0	0	0	12	0
gene-GIB67_000369	JACGCM010002218.1	194890	198340	+	GIB67_000369	34039	rna-gnl|WGS:JACGCM|KingUnif08292.1	GO:0003723(RNA binding);GO:0003729(mRNA binding);GO:0005634(nucleus);GO:0005737(cytoplasm);GO:0006397(mRNA processing);GO:0008143(poly(A) binding)	03013(RNA transport)	K03231	NA	unnamed protein product, partial [Vitis vinifera]	NA	0.191646	0.328702	0	0.125105	0.180463	0.069701	0	0.159043	0	0.070787	0.430132	0.132608	0.866698	0	0	0	0	0	9	17	0	8	10	4	0	7	0	4	25	7	46	0	0	0	0	0
gene-GIB67_000370	JACGCM010002218.1	203573	213813	+	GIB67_000370	34042	rna-gnl|WGS:JACGCM|KingUnif16904.1	GO:0005634(nucleus);GO:0008150(biological_process)	NA	NA	NA	DUF724 domain-containing protein [Actinidia chinensis var. chinensis]	NA	0.184942	0	0.102813	0.058473	0.091414	0.082876	0.068803	0.318224	0.063731	0.206252	0.030867	0.106292	1.08069	0	2.03012	0.090724	0.066335	0.07111	20	0	11	8	12	11	8	28	7	23	4	13	128	0	236	10	8	9
gene-GIB67_000372	JACGCM010002218.1	201767	202291	+	GIB67_000372	34041	rna-gnl|WGS:JACGCM|KingUnif04528.1	NA	NA	NA	NA	DUF724 domain-containing protein [Actinidia chinensis var. chinensis]	NA	0.113728	1.09145	0.550618	0.113566	0.170637	0.051899	0	0.143186	0	0.79584	0.4451	0.405101	0	0.18291	0.061507	0.028267	3.36623	0	4	35	16	4	6	2	0	4	0	25	16	14	0	7	2	1	103	0
gene-GIB67_000374	JACGCM010001401.1	241	19428	-	GIB67_000374	21392	rna-gnl|WGS:JACGCM|KingUnif14500.1	GO:0000139(Golgi membrane);GO:0005215(transporter activity);GO:0005515(protein binding);GO:0005737(cytoplasm);GO:0005789(endoplasmic reticulum membrane);GO:0005829(cytosol);GO:0006810(transport);GO:0006886(intracellular protein transport);GO:0006888(ER to Golgi vesicle-mediated transport);GO:0007029(endoplasmic reticulum organization);GO:0007030(Golgi organization);GO:0008270(zinc ion binding);GO…	04141(Protein processing in endoplasmic reticulum)	K14007	NA	PREDICTED: protein transport protein Sec24-like At3g07100 [Nelumbo nucifera]	NA	0.313215	0.378561	0.29364	0.322976	0.970466	0.245055	0.176104	0.430681	0.29737	0.108067	0.769685	0.276454	0.434925	0.451375	0.103194	0.22746	0.297291	0.256439	62	83	58	77	220	58	38	71	59	23	187	61	97	108	23	47	62	57
gene-GIB67_000375	JACGCM010000190.1	10139	17862	+	GIB67_000375	1827	rna-gnl|WGS:JACGCM|KingUnif08939.1	GO:0005737(cytoplasm)	NA	NA	NA	PREDICTED: uncharacterized protein LOC104610174 [Nelumbo nucifera]	NA	2.69888	4.00509	2.67574	13.1276	11.4697	16.0216	3.33018	5.14934	3.10579	4.19841	9.6615	8.05903	3.0527	3.50076	2.04896	1.68256	1.5205	1.1664	283	465	278	1666	1385	2001	380	447	329	463	1247	945	361	446	239	185	168	138
gene-GIB67_000376	JACGCM010000190.1	481	6467	+	GIB67_000376	1826	rna-gnl|WGS:JACGCM|KingUnif41887.1	GO:0003674(molecular_function);GO:0008150(biological_process)	NA	NA	NA	PREDICTED: CCR4-NOT transcription complex subunit 11 isoform X1 [Nelumbo nucifera]	NA	3.76308	4.48234	3.48156	4.18096	5.50719	4.36896	2.97203	8.15685	9.24736	5.42204	7.41411	3.46611	4.04393	3.7479	6.08521	2.81129	2.02803	6.20202	355	470	327	479	600	492	306	639	882	539	863	367	432	430	639	278	202	661
gene-GIB67_000377	JACGCM010000190.1	20199	22973	+	GIB67_000377	1829	rna-gnl|WGS:JACGCM|KingUnif37857.1	GO:0003674(molecular_function);GO:0005634(nucleus);GO:0005635(nuclear envelope);GO:0005783(endoplasmic reticulum);GO:0008150(biological_process)	NA	NA	NA	PREDICTED: uncharacterized protein slp1-like [Nelumbo nucifera]	NA	20.3575	13.0517	19.8584	17.1643	17.7151	15.5685	18.6603	22.6799	16.3666	33.4652	13.1297	16.7996	31.248	39.2072	26.2804	18.691	27.5865	17.7506	1875	1334	1817	1918	1883	1712	1874	1733	1524	3247	1492	1734	3252	4389	2692	1802	2682	1845
gene-GIB67_000378	JACGCM010000190.1	18322	19137	+	GIB67_000378	1828	rna-gnl|WGS:JACGCM|KingUnif09756.1	NA	NA	NA	NA		NA	1.4824	0.859323	2.17245	1.5802	2.16641	3.66931	0	1.90404	1.03919	2.48053	2.33696	1.44384	3.58933	6.5435	3.2021	0	0	0.367187	43	28	63	56	73	127	0	46	31	76	84	47	117	230	103	0	0	12
gene-GIB67_000379	JACGCM010000190.1	23251	33973	-	GIB67_000379	1830	rna-gnl|WGS:JACGCM|KingUnif30744.1	GO:0000139(Golgi membrane);GO:0000266(mitochondrial fission);GO:0003924(GTPase activity);GO:0005525(GTP binding);GO:0005737(cytoplasm);GO:0005774(vacuolar membrane);GO:0005794(Golgi apparatus);GO:0005829(cytosol);GO:0005874(microtubule);GO:0005886(plasma membrane);GO:0006896(Golgi to vacuole transport);GO:0008017(microtubule binding);GO:0008289(lipid binding);GO:0009506(plasmodesma);GO:0009524(ph…	04144(Endocytosis)	K01528	EC:3.6.5.5	hypothetical protein VITISV_043157 [Vitis vinifera]	NA	5.01977	3.91789	3.70136	5.3227	7.54662	4.17305	3.93945	3.32953	5.2855	5.31009	5.61065	4.00257	7.5802	3.85206	7.75057	6.86717	6.16644	4.56709	606	525	444	779	1051	601	519	334	645	676	836	542	1034	565	1041	868	786	622
gene-GIB67_000381	JACGCM010001519.1	19278	22290	+	GIB67_000381	23077	rna-gnl|WGS:JACGCM|KingUnif27974.1	GO:0005634(nucleus);GO:0005737(cytoplasm);GO:0008150(biological_process);GO:0009055(electron transfer activity);GO:0046872(metal ion binding)	NA	NA	NA	unknown [Lotus japonicus]	NA	14.511	12.298	11.4782	4.32854	4.35495	3.49559	3.88378	7.49216	3.68825	19.1648	6.54162	5.35318	7.94231	8.49083	9.53832	18.0908	10.9041	3.61845	790	742	621	286	274	227	231	339	203	1099	439	327	489	562	578	1030	627	223
gene-GIB67_000382	JACGCM010001519.1	31597	34603	-	GIB67_000382	23078	rna-gnl|WGS:JACGCM|KingUnif07486.1	GO:0005634(nucleus);GO:0005737(cytoplasm);GO:0008150(biological_process);GO:0009055(electron transfer activity);GO:0046872(metal ion binding)	NA	NA	NA	unknown [Lotus japonicus]	NA	14.3676	12.0637	12.868	5.55351	6.98797	2.47991	5.60741	7.22699	4.17845	24.2347	11.3248	9.20913	12.4895	12.1766	15.5736	17.9125	13.2032	5.16634	782	728	696	367	439	161	333	327	230	1389	760	562	768	806	943	1020	759	318
gene-GIB67_000383	JACGCM010000390.1	28652	30678	+	GIB67_000383	4410	rna-gnl|WGS:JACGCM|KingUnif21027.1	NA	NA	NA	NA		NA	0	0	0	0	0	0	0	0	0	0	0	0	0	0.282996	0.075706	0	0.035828	0	0	0	0	0	0	0	0	0	0	0	0	0	0	17	5	0	2	0
gene-GIB67_000385	JACGCM010000390.1	15810	18227	-	GIB67_000385	4409	rna-gnl|WGS:JACGCM|KingUnif10649.1	GO:0005634(nucleus);GO:0016567(protein ubiquitination)	NA	NA	NA	BTB/POZ-like [Macleaya cordata]	NA	0.825161	0.582186	0.398481	1.64707	0.81302	0.760861	1.29406	1.80261	2.09081	0.970499	3.12423	2.11416	3.2356	2.62872	6.92425	3.64372	4.57186	1.41698	88	69	42	211	99	96	149	158	223	108	407	250	386	338	813	403	510	169
gene-GIB67_000386	JACGCM010000390.1	8971	13896	-	GIB67_000386	4408	rna-gnl|WGS:JACGCM|KingUnif24909.1	GO:0003674(molecular_function);GO:0005634(nucleus);GO:0008150(biological_process)	NA	NA	NA	PREDICTED: uncharacterized protein LOC104595995 isoform X1 [Nelumbo nucifera]	NA	2.86334	2.46568	3.36748	11.8904	10.3472	10.6466	4.39004	6.37541	6.04267	2.59715	6.14136	9.52801	8.61143	10.941	9.03317	3.70401	5.55932	4.45692	619	591	723	3117	2581	2746	1035	1143	1320	592	1638	2308	2103	2874	2172	838	1269	1087
gene-GIB67_000387	JACGCM010000833.1	1	5555	-	GIB67_000387	11554	rna-gnl|WGS:JACGCM|KingUnif04179.1	GO:0006999(nuclear pore organization);GO:0017056(structural constituent of nuclear pore);GO:0044611(nuclear pore inner ring)	NA	NA	NA	hypothetical protein BVC80_1105g15 [Macleaya cordata]	NA	3.25835	2.30379	4.96298	2.34801	2.66092	4.10178	4.94024	4.95509	5.22415	3.07626	7.90219	3.96909	2.27356	3.62806	13.1651	3.32941	4.32491	2.95019	411	322	621	359	387	617	678	518	665	408	1228	560	324	556	1844	439	575	420
gene-GIB67_000389	JACGCM010002868.1	16605	19091	-	GIB67_000389	42870	rna-gnl|WGS:JACGCM|KingUnif34712.1	NA	NA	NA	NA	PREDICTED: succinate dehydrogenase assembly factor 2, mitochondrial [Nelumbo nucifera]	NA	40.7935	46.9276	37.7872	77.6072	59.348	46.7363	71.0326	66.0423	58.1502	41.069	62.6195	57.4702	6.15854	28.1369	27.2849	66.1432	62.5415	56.1831	1937	2471	1782	4469	3252	2648	3677	2602	2790	2055	3668	3057	331	1624	1441	3287	3135	3010
gene-GIB67_000390	JACGCM010002868.1	24653	30024	-	GIB67_000390	42871	rna-gnl|WGS:JACGCM|KingUnif19044.1	GO:0005524(ATP binding);GO:0005739(mitochondrion);GO:0006952(defense response);GO:0043531(ADP binding)	04626(Plant-pathogen interaction)	K13459	NA	uncharacterized protein LOC113291846 [Papaver somniferum]	NA	0.159394	0.047769	0.028859	0.350753	0.404297	0.500331	0.132389	0.140337	0.137738	0.140715	1.36885	0.461233	0.638085	1.13171	0.499618	1.25379	1.80142	0.57739	41	14	8	110	120	154	38	30	36	39	434	133	186	354	143	337	489	168
gene-GIB67_000391	JACGCM010002868.1	11677	12573	-	GIB67_000391	42869	rna-gnl|WGS:JACGCM|KingUnif38515.1	NA	NA	NA	NA		NA	0	0.067347	0.038973	0	0	0	0.003727	0.060413	0.191108	0	0	0	0.302289	0	0.163029	0	0	0.186221	0	3	2	0	0	0	1	2	7	0	0	0	12	0	7	0	0	8
gene-GIB67_000392	JACGCM010000233.1	4159	5218	+	GIB67_000392	2356	rna-gnl|WGS:JACGCM|KingUnif15927.1	GO:0000049(tRNA binding);GO:0002143(tRNA wobble position uridine thiolation);GO:0005737(cytoplasm);GO:0005829(cytosol);GO:0010311(lateral root formation);GO:0016783(sulfurtransferase activity);GO:0034227(tRNA thio-modification)	04122(Sulfur relay system)	K14169	NA	Thiouridylase [Macleaya cordata]	NA	0.812348	2.36483	0.726416	2.75251	2.62715	2.3837	1.99518	1.91814	1.28443	1.41961	3.92874	4.55836	5.54044	2.33045	6.91551	1.35938	2.8123	1.47355	35	112	31	142	129	121	93	68	55	64	206	217	266	121	326	61	126	71
gene-GIB67_000394	JACGCM010002304.1	26115	32122	-	GIB67_000394	35607	rna-gnl|WGS:JACGCM|KingUnif05169.1	GO:0003676(nucleic acid binding);GO:0003677(DNA binding);GO:0005634(nucleus);GO:0046872(metal ion binding)	NA	NA	NA	putative calcium-binding protein C800.10c [Vitis vinifera]	NA	0.999311	0.574081	0.36131	0.202877	0.036522	0.03074	0.422189	0.360449	0.523202	1.28863	0.280687	0.06197	0.547697	0.189557	0.466053	0.566182	0.405501	2.29261	75	48	27	19	4	3	35	23	40	102	26	6	47	18	39	45	32	193
gene-GIB67_000395	JACGCM010001293.1	109693	111142	+	GIB67_000395	20273	rna-gnl|WGS:JACGCM|KingUnif36860.1	GO:0009813(flavonoid biosynthetic process);GO:0043231(intracellular membrane-bounded organelle);GO:0052696(flavonoid glucuronidation);GO:0080043(quercetin 3-O-glucosyltransferase activity);GO:0080044(quercetin 7-O-glucosyltransferase activity)	NA	NA	NA	UDP-glucuronosyl/UDP-glucosyltransferase [Macleaya cordata]	NA	2.21869	0.663966	0.61259	2.02034	0	1.10908	1.15586	4.16024	1.521	4.97872	0.988197	0.547624	2.54079	0.580748	3.65205	15.3767	18.2808	2.99232	158	53	44	175	0	95	90	246	110	374	87	44	205	51	290	1146	1375	241
gene-GIB67_000399	JACGCM010001293.1	383833	385443	+	GIB67_000399	20277	rna-gnl|WGS:JACGCM|KingUnif31366.1	GO:0004497(monooxygenase activity);GO:0007275(multicellular organism development);GO:0010268(brassinosteroid homeostasis);GO:0016125(sterol metabolic process);GO:0016132(brassinosteroid biosynthetic process)	NA	NA	NA	PREDICTED: beta-amyrin 28-oxidase [Theobroma cacao]	NA	0	0.211634	0.080602	0	0.201219	0.130604	0.211432	0.294536	0.450848	0.525412	0.110737	0.163374	16.1723	29.6781	90.7145	159.862	52.3578	74.8625	0	19	7	0	19	13	19	20	36	44	11	15	1443	2849	7967	13210	4365	6671
gene-GIB67_000400	JACGCM010001293.1	403979	407560	-	GIB67_000400	20278	rna-gnl|WGS:JACGCM|KingUnif39292.1	GO:0019745(pentacyclic triterpenoid biosynthetic process);GO:0042300(beta-amyrin synthase activity)	00909(Sesquiterpenoid and triterpenoid biosynthesis)	K15813	EC:5.4.99.39	hypothetical protein BVC80_521g128 [Macleaya cordata]	NA	0	0.047347	0	0	0.075327	0.047551	0.324457	0	0.413836	0.20822	0	0.161393	5.9924	13.5394	167.404	97.6934	36.6544	13.3749	0	7	0	0	11	8	45	0	53	28	0	23	853	2073	23448	12876	4873	1901
gene-GIB67_000404	JACGCM010001293.1	590053	593610	-	GIB67_000404	20282	rna-gnl|WGS:JACGCM|KingUnif33925.1	GO:0003824(catalytic activity);GO:0004084(branched-chain-amino-acid transaminase activity);GO:0005829(cytosol);GO:0009082(branched-chain amino acid biosynthetic process);GO:0009097(isoleucine biosynthetic process);GO:0009098(leucine biosynthetic process);GO:0009099(valine biosynthetic process);GO:0009507(chloroplast);GO:0009570(chloroplast stroma);GO:0052654(L-leucine transaminase activity);GO:00…	00270(Cysteine and methionine metabolism);00280(Valine, leucine and isoleucine degradation);00290(Valine, leucine and isoleucine biosynthesis);00770(Pantothenate and CoA biosynthesis)	K00826	EC:2.6.1.42	Aminotransferase [Macleaya cordata]	NA	0.361863	0.123697	0.439632	0.243726	0.184438	0.101931	0.39622	0.044825	0.523087	1.03977	0	0.692669	10.0828	3.52363	136.907	56.291	31.6324	6.17533	23	9	28	19	14	8	28	3	34	70	0	50	723	272	9664	3739	2120	443
gene-GIB67_000406	JACGCM010001293.1	730476	732873	+	GIB67_000406	20285	rna-gnl|WGS:JACGCM|KingUnif16316.1	GO:0004497(monooxygenase activity);GO:0007275(multicellular organism development);GO:0010268(brassinosteroid homeostasis);GO:0016125(sterol metabolic process);GO:0016132(brassinosteroid biosynthetic process)	NA	NA	NA	PREDICTED: cytochrome P450 716B1 [Vitis vinifera]	NA	0.134514	0.100629	0.087705	0	0.282372	0.306439	0.776423	0.227107	0.65603	1.82789	0.168882	0.333542	31.504	31.0972	246.034	302.432	126.516	146.844	11	10	8	0	27	30	70	16	55	158	18	31	2905	3085	22328	25825	10898	13522
gene-GIB67_000407	JACGCM010001293.1	710758	722087	+	GIB67_000407	20284	rna-gnl|WGS:JACGCM|KingUnif11816.1	GO:0004559(alpha-mannosidase activity);GO:0006013(mannose metabolic process);GO:0006517(protein deglycosylation)	00511(Other glycan degradation)	K01191	EC:3.2.1.24	Lysosomal alpha-mannosidase [Morus notabilis]	NA	0.818954	0.512587	0.668328	0.439479	0.194715	0.1651	1.33995	1.62195	2.13699	0.507904	0.026152	0.285889	0.312264	0.482705	1.32588	4.01082	3.79019	1.59485	48	33	39	31	14	12	85	78	125	31	2	19	21	34	86	243	232	105
gene-GIB67_000409	JACGCM010001293.1	837642	840230	-	GIB67_000409	20288	rna-gnl|WGS:JACGCM|KingUnif30251.1	GO:0004497(monooxygenase activity);GO:0005783(endoplasmic reticulum);GO:0007275(multicellular organism development);GO:0010268(brassinosteroid homeostasis);GO:0016125(sterol metabolic process);GO:0016132(brassinosteroid biosynthetic process)	NA	NA	NA	cytochrome P450 87A3-like [Manihot esculenta]	NA	0.377948	0.354661	0.652649	0	0.513426	0.113429	2.53057	1.20851	1.01137	3.52849	0.06003	0.431137	49.7915	56.7765	357.924	189.975	108.451	61.6424	32	33	54	0	49	12	228	83	85	308	7	40	4650	5704	32897	16430	9461	5749
gene-GIB67_000413	JACGCM010001293.1	911435	915326	+	GIB67_000413	20291	rna-gnl|WGS:JACGCM|KingUnif01969.1	GO:0003863(3-methyl-2-oxobutanoate dehydrogenase (2-methylpropanoyl-transferring) activity);GO:0005739(mitochondrion);GO:0005759(mitochondrial matrix);GO:0016624(oxidoreductase activity, acting on the aldehyde or oxo group of donors, disulfide as acceptor);GO:0046872(metal ion binding);GO:0055114(oxidation-reduction process)	00640(Propanoate metabolism);00280(Valine, leucine and isoleucine degradation)	K00166	EC:1.2.4.4	hypothetical protein AQUCO_01400349v1 [Aquilegia coerulea]	NA	0.410397	0.054188	0.049372	0	0.064027	0	0.150048	0.084428	0.023924	0.211242	0	0.058076	2.29448	3.34855	21.0346	14.5375	14.829	2.57734	25	4	3	0	5	0	10	5	2	14	0	4	153	241	1381	898	924	172
gene-GIB67_000414	JACGCM010001293.1	999213	1000973	+	GIB67_000414	20292	rna-gnl|WGS:JACGCM|KingUnif15445.1	NA	NA	NA	NA		NA	0	0	0	0	0	0	0	0	0	0	0	0	0	0	0.119009	0	0	0	0	0	0	0	0	0	0	0	0	0	0	0	0	0	3	0	0	0
gene-GIB67_000415	JACGCM010001293.1	1004473	1005403	-	GIB67_000415	20294	rna-gnl|WGS:JACGCM|KingUnif23970.1	GO:0005829(cytosol);GO:0016618(hydroxypyruvate reductase activity);GO:0030267(glyoxylate reductase (NADP) activity)	00630(Glyoxylate and dicarboxylate metabolism);00260(Glycine, serine and threonine metabolism)	K15893	NA	D-isomer specific 2-hydroxyacid dehydrogenase [Macleaya cordata]	NA	0.478491	1.54663	1.28927	0	0	0	0	0	0	0.502884	0	0	0	0	0	0	0	0	12	40	30	0	0	0	0	0	0	13	0	0	0	0	0	0	0	0
gene-GIB67_000416	JACGCM010001293.1	1002970	1003972	-	GIB67_000416	20293	rna-gnl|WGS:JACGCM|KingUnif31496.1	GO:0003777(microtubule motor activity);GO:0005871(kinesin complex);GO:0007018(microtubule-based movement);GO:0016887(ATPase activity)	NA	NA	NA	Kinesin [Macleaya cordata]	NA	0	0.521385	1.0053	0	0	0	0	0	0	1.53485	0	0	0	0	0	0	0	0	0	22	38	0	0	0	0	0	0	61	0	0	0	0	0	0	0	0
gene-GIB67_000417	JACGCM010001293.1	1009992	1010715	-	GIB67_000417	20295	rna-gnl|WGS:JACGCM|KingUnif32131.1	NA	00230(Purine metabolism);00240(Pyrimidine metabolism);03020(RNA polymerase)	K03013	NA	PREDICTED: uncharacterized protein LOC109342393 [Lupinus angustifolius]	NA	0	0	0	0	0	0	0	0	0	0.096408	0	0	0	0	0	0	0	0	0	0	0	0	0	0	0	0	0	4	0	0	0	0	0	0	0	0
gene-GIB67_000418	JACGCM010001293.1	1114980	1116961	+	GIB67_000418	20298	rna-gnl|WGS:JACGCM|KingUnif09700.1	GO:0004197(cysteine-type endopeptidase activity);GO:0005615(extracellular space);GO:0005764(lysosome);GO:0051603(proteolysis involved in cellular protein catabolic process)	NA	NA	NA	PREDICTED: cysteine proteinase COT44 [Nelumbo nucifera]	NA	0	0	0	0	0	0	0	0	0.066999	0	0	0	0	0	0	0.406213	0.412071	0	0	0	0	0	0	0	0	0	4	0	0	0	0	0	0	19	20	0
gene-GIB67_000419	JACGCM010001293.1	1133913	1137639	+	GIB67_000419	20300	rna-gnl|WGS:JACGCM|KingUnif40031.1	NA	NA	NA	NA		NA	0	0	0	0	0	0	0	0	0	0	0	0	0	0	0	0	0.085535	0	0	0	0	0	0	0	0	0	0	0	0	0	0	0	0	0	8	0
gene-GIB67_000420	JACGCM010001293.1	1165609	1166860	+	GIB67_000420	20305	rna-gnl|WGS:JACGCM|KingUnif32601.1	NA	NA	NA	NA	protein of unknown function DUF4283 [Macleaya cordata]	NA	0	0.144249	0	0.103508	0	0	0	0	0	0	0	0	0	0	0	0	0	0	0	9	0	7	0	0	0	0	0	0	0	0	0	0	0	0	0	0
gene-GIB67_000421	JACGCM010001293.1	1128872	1130113	-	GIB67_000421	20299	rna-gnl|WGS:JACGCM|KingUnif19977.1	GO:0000159(protein phosphatase type 2A complex);GO:0005515(protein binding);GO:0005634(nucleus);GO:0005777(peroxisome);GO:0005829(cytosol);GO:0007165(signal transduction);GO:0009742(brassinosteroid mediated signaling pathway);GO:0019888(protein phosphatase regulator activity);GO:0032000(positive regulation of fatty acid beta-oxidation);GO:1900458(negative regulation of brassinosteroid mediated si…	03015(mRNA surveillance pathway)	K11584	NA	PREDICTED: serine/threonine protein phosphatase 2A 57 kDa regulatory subunit B' theta isoform-like [Nelumbo nucifera]	NA	11.539	10.5243	10.1879	16.3004	17.7319	19.1141	13.9508	17.3847	16.4402	11.3349	23.1602	16.6981	7.59374	11.2354	8.08315	6.36465	7.55419	8.68634	788	797	691	1350	1397	1557	1038	985	1134	815	1950	1277	586	932	614	455	545	669
gene-GIB67_000422	JACGCM010001293.1	1096943	1098151	-	GIB67_000422	20296	rna-gnl|WGS:JACGCM|KingUnif10227.1	GO:0000038(very long-chain fatty acid metabolic process);GO:0005634(nucleus);GO:0005783(endoplasmic reticulum);GO:0005789(endoplasmic reticulum membrane);GO:0006633(fatty acid biosynthetic process);GO:0008610(lipid biosynthetic process);GO:0009409(response to cold);GO:0009416(response to light stimulus);GO:0009913(epidermal cell differentiation);GO:0016020(membrane);GO:0016021(integral component …	00062(Fatty acid elongation)	K15397	EC:2.3.1.199	FAE1/Type III polyketide synthase-like protein [Macleaya cordata]	NA	0	0	0	0.477752	0.22941	0	0.272498	0.394138	0.380326	0.655622	0.140272	0.130383	1.17972	0.300874	0	2.23913	0.633895	0.809725	0	0	0	16	8	0	9	9	11	19	5	4	37	10	0	64	19	25
gene-GIB67_000423	JACGCM010001293.1	1152658	1165244	-	GIB67_000423	20304	rna-gnl|WGS:JACGCM|KingUnif20762.1	GO:0004222(metalloendopeptidase activity);GO:0006518(peptide metabolic process)	NA	NA	NA	Peptidase M3A/M3B [Macleaya cordata]	NA	4.29452	6.59688	3.67491	2.52572	3.37338	1.80644	9.65552	6.37836	10.3709	6.4892	3.83529	4.00001	5.63981	3.80906	7.6311	7.36676	10.568	8.85973	354	602	301	252	321	178	866	436	863	563	390	369	525	381	699	635	918	823
gene-GIB67_000424	JACGCM010001293.1	1142665	1143623	-	GIB67_000424	20301	rna-gnl|WGS:JACGCM|KingUnif30989.1	NA	NA	NA	NA		NA	1.95209	1.48625	0.502839	0.07124	0.114263	0.095908	1.36459	0.728378	2.34688	1.31993	0	0.356287	0.526374	0	0.305204	1.213	1.21102	0.498171	93	79	24	5	7	6	71	29	113	67	0	19	29	0	17	61	61	27
gene-GIB67_000425	JACGCM010001293.1	1111210	1117592	-	GIB67_000425	20297	rna-gnl|WGS:JACGCM|KingUnif19439.1	NA	NA	NA	NA	PREDICTED: uncharacterized protein LOC107063301 [Solanum tuberosum]	NA	7.2709	7.32811	7.11427	8.76435	8.49931	6.8983	6.69403	9.17406	9.65187	8.48945	5.38188	5.22257	4.62353	4.37425	4.49498	5.50563	8.29604	3.63492	130	145	126	190	175	147	130	136	174	160	119	105	94	95	90	103	156	74
gene-GIB67_000426	JACGCM010001293.1	1145296	1145539	-	GIB67_000426	20302	rna-gnl|WGS:JACGCM|KingUnif27083.1	NA	NA	NA	NA		NA	0.406327	0.809717	0	0	0	0	0	0	0.225121	0	0	0	0	0.274507	0	0	0	0.157432	5	12	0	0	0	0	0	0	3	0	0	0	0	5	0	0	0	3
gene-GIB67_000427	JACGCM010001293.1	1146440	1147048	-	GIB67_000427	20303	rna-gnl|WGS:JACGCM|KingUnif10538.1	NA	NA	NA	NA		NA	0	0.701636	0	0.277804	0.356288	0.227173	0.130992	0	0.950029	0.429417	0.147863	0	0	0.10005	0	0.043177	0.333449	0.203165	0	19	0	9	10	7	4	0	23	11	5	0	0	3	0	2	9	6
gene-GIB67_000428	JACGCM010001293.1	1168819	1170266	-	GIB67_000428	20306	rna-gnl|WGS:JACGCM|KingUnif28535.1	GO:0004222(metalloendopeptidase activity);GO:0006518(peptide metabolic process)	NA	NA	NA	PREDICTED: probable thimet oligopeptidase isoform X3 [Nelumbo nucifera]	NA	0	1.71043	0.930178	0.628777	1.01738	1.28329	2.38797	3.21805	4.19917	0	0	0.998126	0	1.1177	2.24331	1.84092	1.86143	3.5159	0	57	28	23	36	46	78	80	127	0	0	34	0	41	75	58	59	119
gene-GIB67_000429	JACGCM010001293.1	1230873	1239923	+	GIB67_000429	20308	rna-gnl|WGS:JACGCM|KingUnif07868.1	GO:0005047(signal recognition particle binding);GO:0005786(signal recognition particle, endoplasmic reticulum targeting)	03060(Protein export)	K03108	NA	hypothetical protein AQUCO_01100306v1 [Aquilegia coerulea]	NA	20.0564	14.515	25.24	46.1769	48.4374	48.3936	54.8384	53.9278	42.4464	30.7938	67.0839	50.9072	39.9917	50.0939	61.6766	41.454	53.1171	38.8965	2568	2062	3209	7171	7156	7394	7654	5728	5492	4154	10596	7303	5785	7796	8783	5554	7179	5620
gene-GIB67_000430	JACGCM010001293.1	1240188	1252977	+	GIB67_000430	20309	rna-gnl|WGS:JACGCM|KingUnif37067.1	GO:0005634(nucleus);GO:0005737(cytoplasm);GO:0035265(organ growth);GO:0051117(ATPase binding)	NA	NA	NA	UBX [Macleaya cordata]	NA	11.6778	10.0899	9.90504	29.3249	27.7471	19.9861	20.5234	22.1576	13.9546	11.0858	27.6946	25.9865	24.1465	22.3009	23.5645	38.3262	36.0206	23.2438	1025	982	864	3121	2810	2093	1964	1614	1238	1025	2999	2555	2394	2379	2300	3520	3337	2302
gene-GIB67_000432	JACGCM010001293.1	1386184	1388781	+	GIB67_000432	20311	rna-gnl|WGS:JACGCM|KingUnif41903.1	GO:0000981(RNA polymerase II transcription factor activity, sequence-specific DNA binding);GO:0003677(DNA binding);GO:0003700(DNA binding transcription factor activity);GO:0005515(protein binding);GO:0005634(nucleus);GO:0006351(transcription, DNA-templated);GO:0006355(regulation of transcription, DNA-templated);GO:0042802(identical protein binding);GO:0043565(sequence-specific DNA binding)	NA	NA	NA	PREDICTED: trihelix transcription factor GT-1-like [Nelumbo nucifera]	NA	69.1568	53.553	58.7883	67.8491	62.3704	65.2398	53.4183	87.1919	71.2713	46.2667	39.9803	43.9546	26.1304	14.9597	14.3836	24.0199	25.8722	41.3858	2257	1939	1906	2686	2349	2542	1901	2361	2351	1591	1610	1608	964	594	523	821	892	1525
gene-GIB67_000433	JACGCM010001293.1	1362646	1368339	-	GIB67_000433	20310	rna-gnl|WGS:JACGCM|KingUnif19671.1	GO:0005515(protein binding);GO:0005634(nucleus);GO:0005829(cytosol);GO:0009788(negative regulation of abscisic acid-activated signaling pathway);GO:0016567(protein ubiquitination);GO:0016579(protein deubiquitination)	NA	NA	NA	F-box domain [Macleaya cordata]	NA	15.2594	11.4942	12.1959	22.5467	15.0525	19.2765	18.2981	26.257	19.7635	22.3298	13.1721	13.1007	10.62	9.14389	10.1797	10.3816	11.5188	12.4842	2728	2280	2166	4890	3106	4114	3567	3895	3571	4207	2906	2625	2146	1988	2025	1943	2175	2519
gene-GIB67_000434	JACGCM010001293.1	1461290	1467270	+	GIB67_000434	20319	rna-gnl|WGS:JACGCM|KingUnif38267.1	GO:0005737(cytoplasm);GO:0008150(biological_process)	NA	NA	NA	Ankyrin repeat [Macleaya cordata]	NA	6.66271	3.31704	4.24186	16.9619	19.9366	15.8891	9.34925	10.9102	12.9607	9.84221	27.8273	13.916	17.1497	3.59417	27.6971	9.21543	7.39335	12.9526	1065	589	674	3289	3678	3031	1630	1447	2094	1658	5488	2493	3098	699	4924	1542	1248	2337
gene-GIB67_000435	JACGCM010001293.1	1432665	1438290	+	GIB67_000435	20316	rna-gnl|WGS:JACGCM|KingUnif15324.1	GO:0000386(second spliceosomal transesterification activity);GO:0005681(spliceosomal complex)	03040(Spliceosome)	K12819	NA	Pre-mRNA splicing Prp18-interacting factor [Macleaya cordata]	NA	49.1832	48.2292	37.1128	59.1872	55.7873	57.49	45.914	55.2936	46.1391	37.111	55.7956	49.3638	31.6676	25.5722	33.1825	23.4934	37.5489	25.1296	5374	5846	4028	7846	7036	7499	5471	5014	5096	4273	7523	6045	3911	3397	4034	2687	4332	3100
gene-GIB67_000436	JACGCM010001293.1	1450023	1451558	+	GIB67_000436	20318	rna-gnl|WGS:JACGCM|KingUnif17896.1	GO:0003674(molecular_function);GO:0005739(mitochondrion);GO:0008150(biological_process)	NA	NA	NA	Pentatricopeptide repeat [Macleaya cordata]	NA	1.25512	1.70787	1.54187	1.15563	1.05666	0.469019	2.1831	2.85817	2.22714	1.55697	0.842243	0.492373	1.81548	1.33822	1.59277	0.641887	1.5096	1.03903	106	160	130	119	103	48	201	201	190	139	88	47	174	138	150	57	135	99
gene-GIB67_000437	JACGCM010001293.1	1425196	1428900	+	GIB67_000437	20315	rna-gnl|WGS:JACGCM|KingUnif18602.1	GO:0000325(plant-type vacuole);GO:0005524(ATP binding);GO:0005773(vacuole);GO:0005774(vacuolar membrane);GO:0005886(plasma membrane);GO:0008281(sulfonylurea receptor activity);GO:0008559(xenobiotic transmembrane transporting ATPase activity);GO:0009651(response to salt stress);GO:0016021(integral component of membrane);GO:0030007(cellular potassium ion homeostasis);GO:0042626(ATPase activity, cou…	02010(ABC transporters)	K05666	NA	ABC transporter [Macleaya cordata]	NA	0.122342	0.045331	0.08835	0.098912	0.189986	0.061127	0.701142	1.16744	0.324099	0	0.130251	0.121621	0.935259	1.03789	5.13965	0.245499	0.135338	0.27181	22	9	16	22	39	13	135	171	58	0	29	24	186	222	1006	46	26	54
gene-GIB67_000438	JACGCM010001293.1	1402772	1407356	+	GIB67_000438	20312	rna-gnl|WGS:JACGCM|KingUnif18025.1	GO:0000981(RNA polymerase II transcription factor activity, sequence-specific DNA binding);GO:0003677(DNA binding);GO:0003700(DNA binding transcription factor activity);GO:0005515(protein binding);GO:0005634(nucleus);GO:0006351(transcription, DNA-templated);GO:0006355(regulation of transcription, DNA-templated);GO:0042802(identical protein binding);GO:0043565(sequence-specific DNA binding)	NA	NA	NA	PREDICTED: trihelix transcription factor GT-1-like isoform X1 [Elaeis guineensis]	NA	80.564	65.5273	65.2357	67.9405	63.2732	51.6702	51.7205	74.51	70.6363	63.1281	31.4403	37.048	24.9027	15.0997	14.0056	39.6495	37.7691	39.3991	4448	4014	3578	4551	4032	3406	3114	3414	3942	3673	2142	2293	1554	1014	861	2292	2202	2456
gene-GIB67_000439	JACGCM010001293.1	1443806	1444222	-	GIB67_000439	20317	rna-gnl|WGS:JACGCM|KingUnif21944.1	GO:0005509(calcium ion binding)	04626(Plant-pathogen interaction)	K13448	NA	probable calcium-binding protein CML18 [Papaver somniferum]	NA	27.022	31.3934	57.22	538.919	490.121	431.886	37.5725	70.0473	62.3703	41.1537	455.628	202.163	376.539	321.079	182.886	23.0998	64.9441	56.7578	620	798	1302	14977	12959	11810	939	1332	1445	994	12880	5190	9748	8943	4661	554	1571	1468
gene-GIB67_000440	JACGCM010001293.1	1407805	1409014	-	GIB67_000440	20314	rna-gnl|WGS:JACGCM|KingUnif03694.1	GO:0000776(kinetochore);GO:0000777(condensed chromosome kinetochore);GO:0003677(DNA binding);GO:0005515(protein binding);GO:0005634(nucleus);GO:0005635(nuclear envelope);GO:0005737(cytoplasm);GO:0005828(kinetochore microtubule);GO:0005876(spindle microtubule);GO:0007094(mitotic spindle assembly checkpoint);GO:0007346(regulation of mitotic cell cycle);GO:0010369(chromocenter);GO:0051301(cell divis…	NA	NA	NA	hypothetical protein AQUCO_01100296v1 [Aquilegia coerulea]	NA	0	0	0	0.462571	0.131222	0	0.469802	0.223471	0.076201	0.643077	0	0	3.76435	0.318894	25.9983	5.92985	0.86402	1.95748	0	0	0	24	7	0	22	8	4	28	0	0	176	16	1192	256	38	92
gene-GIB67_000441	JACGCM010001293.1	1404037	1404967	-	GIB67_000441	20313	rna-gnl|WGS:JACGCM|KingUnif24744.1	NA	NA	NA	NA	PREDICTED: uncharacterized protein LOC109227864 [Nicotiana attenuata]	NA	0.058597	0	0.141117	0.043089	0	0.083119	0	0	0.518798	0.43001	0.143544	0	0.094275	0	0	0	0.136852	0	3	0	6	3	0	4	0	0	22	19	8	0	5	0	0	0	6	0
gene-GIB67_000442	JACGCM010001293.1	1611510	1612208	+	GIB67_000442	20325	rna-gnl|WGS:JACGCM|KingUnif39068.1	GO:0003674(molecular_function);GO:0008150(biological_process);GO:0009507(chloroplast)	NA	NA	NA	TRAM/LAG1/CLN8 domain containing protein [Parasponia andersonii]	NA	8.10258	7.2401	6.10439	4.31461	6.84908	3.92938	20.7408	23.0565	14.8039	15.8604	9.20402	4.422	8.1665	14.6744	12.3718	25.9197	28.581	17.1657	312	309	233	201	304	181	869	735	575	642	437	191	355	686	529	1042	1159	745
gene-GIB67_000443	JACGCM010001293.1	1502455	1506958	+	GIB67_000443	20320	rna-gnl|WGS:JACGCM|KingUnif40384.1	GO:0003333(amino acid transmembrane transport);GO:0005886(plasma membrane);GO:0015171(amino acid transmembrane transporter activity)	NA	NA	NA	hypothetical protein AQUCO_01100285v1 [Aquilegia coerulea]	NA	73.1306	74.9303	107.829	891.632	558.124	755.476	123.7	122.269	101.744	122.641	559.897	965.008	115.138	125.627	87.4856	59.3706	78.9853	50.8143	7730	8786	11321	114325	68086	95314	14257	10724	10870	13660	73022	114305	13753	16143	10287	6569	8815	6063
gene-GIB67_000444	JACGCM010001293.1	1517460	1525694	+	GIB67_000444	20321	rna-gnl|WGS:JACGCM|KingUnif38916.1	GO:0005658(alpha DNA polymerase:primase complex);GO:0006270(DNA replication initiation);GO:0046982(protein heterodimerization activity)	00230(Purine metabolism);00240(Pyrimidine metabolism);03030(DNA replication)	K02321	NA	hypothetical protein AQUCO_01100282v1 [Aquilegia coerulea]	NA	0.475318	0.155317	0.453905	0.192404	0.377889	0.140303	0.599125	0.802336	0.637996	0.756389	0.353554	0.330041	4.92503	0.755625	10.214	1.05414	1.35303	1.11341	56	20	53	28	51	20	76	78	75	93	51	43	647	107	1319	129	166	146
gene-GIB67_000446	JACGCM010001293.1	1529580	1538577	-	GIB67_000446	20322	rna-gnl|WGS:JACGCM|KingUnif29953.1	GO:0005737(cytoplasm);GO:0006537(glutamate biosynthetic process);GO:0015930(glutamate synthase activity);GO:0019676(ammonia assimilation cycle)	00910(Nitrogen metabolism);00250(Alanine, aspartate and glutamate metabolism)	K00264	EC:1.4.1.13;EC:1.4.1.14	Pentatricopeptide repeat [Macleaya cordata]	NA	3.65246	5.87835	3.39263	5.51307	4.25392	1.81459	11.7196	4.82023	16.3864	3.81573	1.49378	3.59944	2.50748	1.44937	2.82654	7.03596	7.99662	3.2845	419	747	386	766	563	248	1464	458	1897	461	212	462	325	202	360	844	967	425
gene-GIB67_000453	JACGCM010002763.1	228999	229226	-	GIB67_000453	41076	rna-gnl|WGS:JACGCM|KingUnif31553.1	NA	NA	NA	NA	hypothetical protein TSUD_406700 [Trifolium subterraneum]	NA	0	0	0	0.671301	0	0	0.843479	1.36372	0.826761	0	0.257088	0.282119	0	0	0	0	0	0	0	0	0	11	0	0	12	15	11	0	4	4	0	0	0	0	0	0
gene-GIB67_000455	JACGCM010002763.1	522798	527477	+	GIB67_000455	41083	rna-gnl|WGS:JACGCM|KingUnif15833.1	GO:0003735(structural constituent of ribosome);GO:0006412(translation)	NA	NA	NA	FAS1 domain [Macleaya cordata]	NA	6.62636	10.9422	5.83979	4.82879	5.5284	3.92297	13.5592	8.53307	18.4263	8.19897	6.15865	6.36747	4.78912	3.46189	4.80711	7.32774	11.2302	5.77746	752	1378	659	665	724	532	1678	804	2113	981	863	810	614	478	607	871	1346	740
gene-GIB67_000459	JACGCM010002763.1	519164	520438	-	GIB67_000459	41082	rna-gnl|WGS:JACGCM|KingUnif14373.1	GO:0003674(molecular_function);GO:0005886(plasma membrane);GO:0007568(aging);GO:0009506(plasmodesma);GO:0009933(meristem structural organization);GO:0009956(radial pattern formation);GO:0010015(root morphogenesis);GO:0010305(leaf vascular tissue pattern formation)	NA	NA	NA	Tetraspanin [Trema orientale]	NA	5.34926	0.976716	0.637156	2.93172	2.02758	0.991544	1.10368	1.01358	0.965505	10.6417	23.7942	13.8355	3.02017	4.0967	6.08942	14.5295	26.9072	7.45702	283	58	34	189	124	63	64	45	52	594	1554	821	181	264	359	805	1503	446
gene-GIB67_000460	JACGCM010002763.1	542909	561451	-	GIB67_000460	41084	rna-gnl|WGS:JACGCM|KingUnif09393.1	GO:0000245(spliceosomal complex assembly);GO:0015030(Cajal body)	03013(RNA transport);03015(mRNA surveillance pathway);03018(RNA degradation)	K13126	NA	PREDICTED: 29 kDa ribonucleoprotein A, chloroplastic [Nelumbo nucifera]	NA	18.5867	12.5997	27.2341	17.0123	18.6838	16.9924	26.64	21.3362	22.1182	4.36481	5.34354	7.55197	7.55714	1.75843	7.31903	5.2766	5.27916	4.96972	1420	1068	2066	1576	1647	1549	2219	1352	1708	352	504	647	653	164	622	422	426	429
gene-GIB67_000461	JACGCM010002763.1	637273	638876	-	GIB67_000461	41086	rna-gnl|WGS:JACGCM|KingUnif06744.1	NA	NA	NA	NA		NA	3.33988	6.99442	1.89746	0.906375	1.02041	0.701434	1.68607	1.32901	2.53667	2.24557	0.771832	0.794114	4.25361	1.74988	1.73912	3.76786	3.93152	2.35666	83	191	47	27	29	21	46	28	63	59	24	22	119	53	48	97	102	66
gene-GIB67_000463	JACGCM010002763.1	759381	761221	+	GIB67_000463	41092	rna-gnl|WGS:JACGCM|KingUnif09927.1	GO:0003993(acid phosphatase activity);GO:0004629(phospholipase C activity);GO:0005773(vacuole);GO:0005886(plasma membrane);GO:0006796(phosphate-containing compound metabolic process);GO:0008152(metabolic process);GO:0009395(phospholipid catabolic process);GO:0009506(plasmodesma);GO:0016020(membrane);GO:0016036(cellular response to phosphate starvation);GO:0016788(hydrolase activity, acting on est…	00562(Inositol phosphate metabolism);00564(Glycerophospholipid metabolism);00565(Ether lipid metabolism)	K01114	EC:3.1.4.3	Phosphoesterase [Macleaya cordata]	NA	0	0	0	0.1116	0	0	0.297079	0	0.082302	0	0	0.249179	1.49589	1.1796	2.80266	0.725548	3.32081	0.769364	0	0	0	6	0	0	14	0	4	0	0	12	70	59	128	32	144	36
gene-GIB67_000464	JACGCM010002763.1	757691	758227	+	GIB67_000464	41091	rna-gnl|WGS:JACGCM|KingUnif17268.1	GO:0003993(acid phosphatase activity);GO:0004629(phospholipase C activity);GO:0005886(plasma membrane);GO:0009395(phospholipid catabolic process);GO:0016788(hydrolase activity, acting on ester bonds);GO:0034480(phosphatidylcholine phospholipase C activity)	00562(Inositol phosphate metabolism);00564(Glycerophospholipid metabolism);00565(Ether lipid metabolism)	K01114	EC:3.1.4.3	Phosphoesterase [Macleaya cordata]	NA	0	0.251384	0	0.076751	0.550206	0.056419	0.281858	0	0	0.062622	0.028571	0.070982	0.841884	0.994491	1.93724	0.744422	2.96139	0.185798	0	9	0	3	19	2	10	0	0	2	2	3	29	36	64	23	93	7
gene-GIB67_000467	JACGCM010002763.1	756201	756774	-	GIB67_000467	41090	rna-gnl|WGS:JACGCM|KingUnif43188.1	NA	NA	NA	NA	zinc finger protein [Macleaya cordata]	NA	0	0	0	0	0	0	0	0	0.069222	0.152942	0	0	0	0	0	0	0	0	0	0	0	0	0	0	0	0	2	5	0	0	0	0	0	0	0	0
gene-GIB67_000468	JACGCM010002763.1	733901	734836	-	GIB67_000468	41089	rna-gnl|WGS:JACGCM|KingUnif30448.1	NA	NA	NA	NA	Zinc finger, CCCH-type [Cinnamomum micranthum f. kanehirae]	NA	0	0	0	0	0	0	0	0	0	0.040849	0	0	0.052316	0	0	0.066888	0	0	0	0	0	0	0	0	0	0	0	3	0	0	4	0	0	4	0	0
gene-GIB67_000469	JACGCM010002763.1	858354	860507	+	GIB67_000469	41099	rna-gnl|WGS:JACGCM|KingUnif05753.1	GO:0004674(protein serine/threonine kinase activity);GO:0005886(plasma membrane);GO:0006468(protein phosphorylation)	NA	NA	NA	hypothetical protein AQUCO_00500462v1 [Aquilegia coerulea]	NA	0.116394	0.086757	0	0.500681	0.40964	0.556157	0.083021	0.14317	0.291012	0	0.238256	0.067362	0.193746	0.78712	0.092194	2.57161	1.46869	0.298962	11	9	0	54	42	59	9	11	27	0	27	7	20	85	10	239	138	30
gene-GIB67_000470	JACGCM010002763.1	824185	824682	+	GIB67_000470	41096	rna-gnl|WGS:JACGCM|KingUnif19415.1	GO:0001054(RNA polymerase I activity);GO:0001056(RNA polymerase III activity);GO:0005666(DNA-directed RNA polymerase III complex);GO:0005736(DNA-directed RNA polymerase I complex)	00230(Purine metabolism);00240(Pyrimidine metabolism);03020(RNA polymerase)	K03027	NA	PREDICTED: DNA-directed RNA polymerases I and III subunit RPAC1 isoform X1 [Nelumbo nucifera]	NA	0	0	0	0	0	0	0	0	0.160086	0	0	0	0	0	0	0	0	0	0	0	0	0	0	0	0	0	5	0	0	0	0	0	0	0	0	0
gene-GIB67_000474	JACGCM010002763.1	798633	799658	-	GIB67_000474	41093	rna-gnl|WGS:JACGCM|KingUnif41221.1	NA	NA	NA	NA		NA	0.905146	1.06178	1.33327	9.12566	3.93911	3.02652	2.07053	1.60893	0.631565	2.2068	3.31128	3.39421	3.75209	1.54309	3.9105	1.15045	1.84436	0	43	56	63	522	215	171	107	63	31	110	193	180	200	89	205	57	92	0
gene-GIB67_000476	JACGCM010002763.1	861425	895953	-	GIB67_000476	41100	rna-gnl|WGS:JACGCM|KingUnif33161.1	GO:0005634(nucleus);GO:0005886(plasma membrane)	NA	NA	NA	hypothetical protein BVC80_9095g136 [Macleaya cordata]	NA	4.40683	5.91046	5.81353	13.925	16.0843	16.1352	6.18537	6.30676	7.06158	4.57979	6.04203	11.1071	5.71193	6.3944	6.53904	4.81401	6.58644	5.91697	524	779	686	2007	2205	2288	802	622	848	574	886	1479	767	924	864	599	826	794
gene-GIB67_000477	JACGCM010002763.1	1021929	1022492	+	GIB67_000477	41102	rna-gnl|WGS:JACGCM|KingUnif14846.1	NA	NA	NA	NA	PREDICTED: uncharacterized protein LOC104585616 [Nelumbo nucifera]	NA	2.92848	2.38535	5.92307	33.9902	25.9368	31.8146	8.97364	10.0099	9.4651	4.33254	20.0273	22.2647	27.5405	19.1794	15.2206	8.21228	11.0066	4.16028	91	82	183	1278	928	1177	304	258	297	142	766	774	965	723	525	267	361	146
gene-GIB67_000481	JACGCM010002763.1	1247517	1248041	+	GIB67_000481	41105	rna-gnl|WGS:JACGCM|KingUnif11806.1	GO:0016746(transferase activity, transferring acyl groups);GO:0080167(response to karrikin)	NA	NA	NA	AIG2-like [Macleaya cordata]	NA	16.3935	10.832	9.8106	14.8158	12.4241	12.5711	25.9682	25.4058	19.2039	16.0629	9.33961	9.0925	8.78923	4.48414	6.72254	18.2493	15.6555	16.4647	473	347	282	519	414	433	817	608	560	489	333	294	287	158	216	551	477	536
gene-GIB67_000482	JACGCM010002763.1	1248752	1254502	-	GIB67_000482	41106	rna-gnl|WGS:JACGCM|KingUnif09686.1	GO:0005737(cytoplasm);GO:0006457(protein folding)	NA	NA	NA	Chaperone protein like [Actinidia chinensis var. chinensis]	NA	7.70547	5.4155	5.81473	9.74893	12.0176	8.65727	6.41636	7.5314	5.67545	8.09812	7.48062	6.21549	6.88446	3.98961	4.53322	4.05154	6.42258	4.18014	617	481	462	946	1110	827	560	500	459	683	739	558	623	388	404	340	543	378
gene-GIB67_000483	JACGCM010002763.1	1381408	1385552	-	GIB67_000483	41110	rna-gnl|WGS:JACGCM|KingUnif13235.1	GO:0004817(cysteine-tRNA ligase activity);GO:0005739(mitochondrion);GO:0005829(cytosol);GO:0006423(cysteinyl-tRNA aminoacylation);GO:0009507(chloroplast)	00970(Aminoacyl-tRNA biosynthesis)	K01883	EC:6.1.1.16	Cysteinyl-tRNA synthetase/mycothiol ligase [Macleaya cordata]	NA	0	0.077907	0	0	0.088922	0	0	0	0	0	0	0	0	0	0	0	0	0	0	7	0	0	8	0	0	0	0	0	0	0	0	0	0	0	0	0
gene-GIB67_000484	JACGCM010002763.1	1301568	1302068	-	GIB67_000484	41107	rna-gnl|WGS:JACGCM|KingUnif39376.1	GO:0008792(arginine decarboxylase activity);GO:0033388(putrescine biosynthetic process from arginine)	00330(Arginine and proline metabolism)	K01583	EC:4.1.1.19	arginine decarboxylase, partial [Erythroxylum coca]	NA	0	0	0	0.051117	0	0	0.1204	0	0.072854	0	0.347854	0	0.369954	0.116358	1.00817	0.487819	0.246392	2.30823	0	0	0	2	0	0	4	0	3	0	12	0	12	4	31	15	8	72
gene-GIB67_000485	JACGCM010002763.1	1302434	1302712	-	GIB67_000485	41109	rna-gnl|WGS:JACGCM|KingUnif04873.1	GO:0005515(protein binding);GO:0005634(nucleus);GO:0005829(cytosol);GO:0006527(arginine catabolic process);GO:0006596(polyamine biosynthetic process);GO:0006970(response to osmotic stress);GO:0006979(response to oxidative stress);GO:0008295(spermidine biosynthetic process);GO:0008792(arginine decarboxylase activity);GO:0009409(response to cold);GO:0009446(putrescine biosynthetic process);GO:00095…	00330(Arginine and proline metabolism)	K01583	EC:4.1.1.19	arginine decarboxylase-like protein [Cinnamomum micranthum f. kanehirae]	NA	0	0	0	0	0	0	0	0	0	0	0	0	0.049266	0	0	0.063163	0	0.169557	0	0	0	0	0	0	0	0	0	0	0	0	1	0	0	2	0	3
gene-GIB67_000486	JACGCM010002763.1	1302122	1302397	-	GIB67_000486	41108	rna-gnl|WGS:JACGCM|KingUnif09711.1	GO:0008792(arginine decarboxylase activity);GO:0033388(putrescine biosynthetic process from arginine)	00330(Arginine and proline metabolism)	K01583	EC:4.1.1.19	Ornithine/DAP/Arg decarboxylase [Macleaya cordata]	NA	0	0	0	0	0	0	0	0	0	0	0	0	0.226443	0	0.68459	0.837611	0.432263	0.336567	0	0	0	0	0	0	0	0	0	0	0	0	4	0	12	14	7	6
gene-GIB67_000487	JACGCM010002763.1	1449583	1451660	+	GIB67_000487	41115	rna-gnl|WGS:JACGCM|KingUnif03781.1	NA	NA	NA	NA		NA	0	0	0	0	0	0	0.19674	0	0	0	0	0	0	0	0	0.031635	0.258733	0	0	0	0	0	0	0	17	0	0	0	0	0	0	0	0	3	21	0
gene-GIB67_000489	JACGCM010002763.1	1452802	1458491	+	GIB67_000489	41116	rna-gnl|WGS:JACGCM|KingUnif39973.1	GO:0004326(tetrahydrofolylpolyglutamate synthase activity);GO:0005759(mitochondrial matrix);GO:0006730(one-carbon metabolic process);GO:0008841(dihydrofolate synthase activity);GO:0009793(embryo development ending in seed dormancy)	00790(Folate biosynthesis)	K20457	EC:6.3.2.12	hypothetical protein AQUCO_01300145v1 [Aquilegia coerulea]	NA	0	0.063671	0	0.110457	0.464121	0.361262	2.19556	0.594714	1.2094	0	0	0	0	0.010658	0.077699	1.1935	2.55256	0	0	6	0	12	46	37	203	42	104	0	0	0	0	2	8	106	228	0
gene-GIB67_000491	JACGCM010002763.1	1446255	1446533	-	GIB67_000491	41113	rna-gnl|WGS:JACGCM|KingUnif30340.1	GO:0004674(protein serine/threonine kinase activity);GO:0004712(protein serine/threonine/tyrosine kinase activity);GO:0005524(ATP binding);GO:0005634(nucleus);GO:0007093(mitotic cell cycle checkpoint);GO:0016301(kinase activity);GO:0046777(protein autophosphorylation);GO:0051304(chromosome separation)	NA	NA	NA	probable serine/threonine-protein kinase mps1 isoform X1 [Quercus suber]	NA	0	0	0	0	0	0	0	0	0	0	0	0	0	0	0	0	0.176319	0	0	0	0	0	0	0	0	0	0	0	0	0	0	0	0	0	3	0
gene-GIB67_000492	JACGCM010002763.1	1446561	1448910	-	GIB67_000492	41114	rna-gnl|WGS:JACGCM|KingUnif39467.1	GO:0004674(protein serine/threonine kinase activity);GO:0004712(protein serine/threonine/tyrosine kinase activity);GO:0005524(ATP binding);GO:0005634(nucleus);GO:0007093(mitotic cell cycle checkpoint);GO:0016301(kinase activity);GO:0046777(protein autophosphorylation);GO:0051304(chromosome separation)	NA	NA	NA	Protein kinase domain [Macleaya cordata]	NA	0	0	0	0	0	0	0.128325	0	0	0	0	0	0	0	0	0	0.166743	0	0	0	0	0	0	0	4	0	0	0	0	0	0	0	0	0	5	0
gene-GIB67_000493	JACGCM010002763.1	1591810	1592618	-	GIB67_000493	41117	rna-gnl|WGS:JACGCM|KingUnif23854.1	GO:0009670(triose-phosphate:phosphate antiporter activity);GO:0015121(phosphoenolpyruvate:phosphate antiporter activity);GO:0015714(phosphoenolpyruvate transport);GO:0034219(carbohydrate transmembrane transport);GO:0035436(triose phosphate transmembrane transport)	NA	NA	NA	Drug/metabolite transporter [Macleaya cordata]	NA	2.61837	5.71629	1.69217	0	1.42356	0.494497	4.60194	2.56852	9.63086	2.1886	0.755558	0.416609	0	1.31154	0.380003	4.99855	6.65643	2.4022	104	251	67	0	65	24	199	85	386	92	37	19	0	64	17	207	278	108
gene-GIB67_000494	JACGCM010002763.1	1596572	1598546	-	GIB67_000494	41119	rna-gnl|WGS:JACGCM|KingUnif26849.1	NA	NA	NA	NA		NA	2.89656	9.02669	1.5779	0	2.05842	1.0772	5.97027	4.47685	8.39708	4.06735	0.29703	0.460015	0	1.16226	0.330827	2.33224	3.9966	1.79391	103	355	56	0	85	46	231	132	301	152	13	19	0	51	14	87	150	72
gene-GIB67_000495	JACGCM010002763.1	1596047	1596429	-	GIB67_000495	41118	rna-gnl|WGS:JACGCM|KingUnif29908.1	GO:0009826(unidimensional cell growth);GO:0009926(auxin polar transport)	NA	NA	NA	auxin transport protein BIG-like [Papaver somniferum]	NA	2.53967	3.29699	0.684031	0	0	0.408075	0	0.719613	4.56163	0.567453	0.944016	0.435401	0	1.43756	0	3.00637	3.90627	0	41	59	11	0	0	8	0	10	74	10	19	8	0	28	0	50	66	0
gene-GIB67_000497	JACGCM010002763.1	1709781	1711568	-	GIB67_000497	41121	rna-gnl|WGS:JACGCM|KingUnif19219.1	NA	NA	NA	NA	hypothetical protein BVC80_1653g7 [Macleaya cordata]	NA	0.666948	0.464351	0.279413	0.062892	0	0.122258	0	0.147176	0.355635	0	0.217032	0	1.15564	0.407497	1.89391	0.565015	0.341659	0.153333	35	27	15	4	0	8	0	7	19	0	14	0	69	26	110	31	19	10
gene-GIB67_000501	JACGCM010002763.1	1850550	1855430	-	GIB67_000501	41125	rna-gnl|WGS:JACGCM|KingUnif42460.1	GO:0000243(commitment complex);GO:0000395(mRNA 5'-splice site recognition);GO:0005685(U1 snRNP);GO:0030627(pre-mRNA 5'-splice site binding);GO:0071004(U2-type prespliceosome)	NA	NA	NA	hypothetical protein Ahy_B06g081850 isoform D [Arachis hypogaea]	NA	0	0	0	0	0	0	0	0.089715	0	0	0	0	0	0.133854	0.332114	0.358541	1.23153	0.631187	0	0	0	0	0	0	0	4	0	0	0	0	0	8	17	17	57	31
gene-GIB67_000502	JACGCM010002763.1	1916425	1916697	+	GIB67_000502	41128	rna-gnl|WGS:JACGCM|KingUnif29193.1	NA	NA	NA	NA	uncharacterized protein LOC113358934 [Papaver somniferum]	NA	0	0.118451	0.026674	0	0	0	0	0.031929	0.036239	0.027842	0	0.023641	0.058059	0	0.045395	0	0.060795	0.155955	0	2	1	0	0	0	0	1	1	1	0	1	1	0	1	0	1	3
gene-GIB67_000503	JACGCM010002763.1	1916734	1919143	+	GIB67_000503	41129	rna-gnl|WGS:JACGCM|KingUnif09345.1	NA	NA	NA	NA	hypothetical protein AQUCO_07300004v1 [Aquilegia coerulea]	NA	0	0	0.206545	0	0	0	0	0	0.022972	0	0	0	0	0	0	0	0	0	0	0	9	0	0	0	0	0	1	0	0	0	0	0	0	0	0	0
gene-GIB67_000504	JACGCM010002763.1	1948781	1950419	-	GIB67_000504	41132	rna-gnl|WGS:JACGCM|KingUnif26551.1	GO:0004372(glycine hydroxymethyltransferase activity);GO:0005737(cytoplasm);GO:0005829(cytosol);GO:0006544(glycine metabolic process);GO:0006563(L-serine metabolic process);GO:0009507(chloroplast);GO:0009536(plastid);GO:0009570(chloroplast stroma);GO:0019264(glycine biosynthetic process from serine);GO:0030170(pyridoxal phosphate binding);GO:0035999(tetrahydrofolate interconversion)	00630(Glyoxylate and dicarboxylate metabolism);00260(Glycine, serine and threonine metabolism);00460(Cyanoamino acid metabolism);00670(One carbon pool by folate)	K00600	EC:2.1.2.1	hypothetical protein B296_00053284 [Ensete ventricosum]	NA	0	0	0.268169	0.142976	0.465473	0.241548	0.332586	0.211741	0.85466	0	0.049289	1.15851	0	0	0	0	0.437347	0	0	0	7	5	13	7	9	5	21	0	2	31	0	0	0	0	11	0
gene-GIB67_000506	JACGCM010002763.1	1924055	1925945	-	GIB67_000506	41131	rna-gnl|WGS:JACGCM|KingUnif13383.1	GO:0005086(ARF guanyl-nucleotide exchange factor activity);GO:0005802(trans-Golgi network);GO:0016192(vesicle-mediated transport)	04144(Endocytosis)	K18443	NA	SEC7-like [Macleaya cordata]	NA	0	0	0	0	0	0	0	0.037227	0.050451	0	0	0	0	0	0	0	0	0	0	0	0	0	0	0	0	2	3	0	0	0	0	0	0	0	0	0
gene-GIB67_000507	JACGCM010002763.1	1920476	1923502	-	GIB67_000507	41130	rna-gnl|WGS:JACGCM|KingUnif12727.1	GO:0001055(RNA polymerase II activity);GO:0005665(DNA-directed RNA polymerase II, core complex)	00230(Purine metabolism);00240(Pyrimidine metabolism);03020(RNA polymerase)	K03010	EC:2.7.7.6	hypothetical protein CRG98_000137, partial [Punica granatum]	NA	0.139211	0	0	0.317369	0.184064	0.283362	1.12589	1.7751	2.19596	0	0.070071	0.26785	0	0	0	0	0	0	11	0	0	29	16	25	91	109	164	0	7	23	0	0	0	0	0	0
gene-GIB67_000509	JACGCM010002763.1	2081187	2082340	-	GIB67_000509	41133	rna-gnl|WGS:JACGCM|KingUnif19435.1	GO:0005515(protein binding);GO:0005634(nucleus);GO:0009960(endosperm development);GO:0043078(polar nucleus);GO:0080113(regulation of seed growth)	NA	NA	NA	VQ [Macleaya cordata]	NA	14.8936	14.7875	14.0333	18.5905	21.7444	17.4738	17.6593	22.958	14.5163	15.6796	31.7312	22.178	14.0456	16.6315	17.2821	12.9936	9.30438	16.5184	580	639	543	878	977	812	749	741	571	643	1523	967	618	787	748	529	383	726
gene-GIB67_000510	JACGCM010000578.1	88922	92397	+	GIB67_000510	6605	rna-gnl|WGS:JACGCM|KingUnif12181.1	GO:0000162(tryptophan biosynthetic process);GO:0005737(cytoplasm);GO:0030170(pyridoxal phosphate binding);GO:0052684(L-serine hydro-lyase (adding indole, L-tryptophan-forming) activity)	00260(Glycine, serine and threonine metabolism);00400(Phenylalanine, tyrosine and tryptophan biosynthesis)	K06001	EC:4.2.1.20	uncharacterized protein LOC112017881 [Quercus suber]	NA	5.05066	3.91815	7.07965	8.60471	12.8672	17.5137	13.648	11.4355	7.0505	1.5927	0.610992	1.36654	5.75777	1.53456	6.34969	1.88547	2.41902	2.07545	525	452	731	1085	1544	2173	1547	987	741	175	79	160	677	194	735	206	266	244
gene-GIB67_000511	JACGCM010000578.1	55931	62241	+	GIB67_000511	6603	rna-gnl|WGS:JACGCM|KingUnif28227.1	GO:0005635(nuclear envelope);GO:0005829(cytosol);GO:0006606(protein import into nucleus)	NA	NA	NA	PREDICTED: importin-9 isoform X1 [Nelumbo nucifera]	NA	1.5678	2.18399	1.85139	1.35619	1.44914	1.00881	1.87153	2.61272	4.33554	1.88364	2.64614	2.21359	3.51601	2.0221	4.929	2.11275	3.52741	5.03799	116	180	136	122	124	89	151	161	324	147	242	184	294	182	406	164	276	421
gene-GIB67_000512	JACGCM010000578.1	73297	87396	+	GIB67_000512	6604	rna-gnl|WGS:JACGCM|KingUnif39435.1	GO:0005635(nuclear envelope);GO:0005829(cytosol);GO:0006606(protein import into nucleus)	NA	NA	NA	hypothetical protein BVC80_9011g12 [Macleaya cordata]	NA	5.99955	8.0014	5.25457	4.92136	4.76041	3.08071	9.14626	8.17604	13.4911	6.99479	5.78989	7.29474	7.64772	4.87023	11.8623	9.65479	11.7986	7.7294	728	1076	633	724	666	446	1209	823	1653	894	866	991	1048	718	1600	1225	1510	1058
gene-GIB67_000516	JACGCM010000578.1	100526	101163	-	GIB67_000516	6606	rna-gnl|WGS:JACGCM|KingUnif41223.1	NA	NA	NA	NA		NA	0	0	0	0	0	0	0	0	0.288453	0	0	0	0	0	0	0	0	0	0	0	0	0	0	0	0	0	6	0	0	0	0	0	0	0	0	0
gene-GIB67_000520	JACGCM010001471.1	100829	109977	-	GIB67_000520	22488	rna-gnl|WGS:JACGCM|KingUnif21460.1	GO:0005576(extracellular region);GO:0005634(nucleus);GO:0008150(biological_process);GO:0016021(integral component of membrane);GO:0016829(lyase activity)	NA	NA	NA	hypothetical protein AQUCO_00200644v1 [Aquilegia coerulea]	NA	8.94773	8.1063	4.56103	7.49222	6.91738	7.00908	4.54548	7.71782	9.73675	10.5473	16.1667	12.6187	8.52436	5.53204	7.51519	6.68822	8.56889	6.73378	1185	1191	600	1203	1057	1108	656	848	1303	1471	2640	1872	1275	891	1107	927	1198	1006
gene-GIB67_000521	JACGCM010001471.1	140615	151194	-	GIB67_000521	22492	rna-gnl|WGS:JACGCM|KingUnif33426.1	GO:0003872(6-phosphofructokinase activity);GO:0005524(ATP binding);GO:0005945(6-phosphofructokinase complex);GO:0006002(fructose 6-phosphate metabolic process);GO:0006096(glycolytic process);GO:0009507(chloroplast);GO:0046872(metal ion binding)	00010(Glycolysis / Gluconeogenesis);00030(Pentose phosphate pathway);00051(Fructose and mannose metabolism);00052(Galactose metabolism);03018(RNA degradation)	K00850	EC:2.7.1.11	Phosphofructokinase domain [Macleaya cordata]	NA	8.9279	9.60744	15.2385	45.1327	34.1605	58.789	34.2469	32.655	23.7903	8.24935	19.2581	38.0294	18.2508	16.4475	9.70698	13.6992	15.4359	12.2369	1056	1261	1791	6476	4664	8300	4417	3205	2845	1029	2811	5041	2440	2366	1278	1696	1928	1634
gene-GIB67_000523	JACGCM010001471.1	180783	190139	+	GIB67_000523	22493	rna-gnl|WGS:JACGCM|KingUnif19202.1	GO:0005634(nucleus);GO:0009791(post-embryonic development);GO:0010228(vegetative to reproductive phase transition of meristem);GO:0042800(histone methyltransferase activity (H3-K4 specific));GO:0048440(carpel development);GO:0048443(stamen development)	NA	NA	NA	histone-lysine N-methyltransferase ATXR3 [Amborella trichopoda]	NA	0	0	0	0	0	0	0	0	0	0	0	0	0	0	0	0.196304	0	0	0	0	0	0	0	0	0	0	0	0	0	0	0	0	0	12	0	0
gene-GIB67_000524	JACGCM010001471.1	195323	200713	-	GIB67_000524	22494	rna-gnl|WGS:JACGCM|KingUnif21420.1	GO:0000170(sphingosine hydroxylase activity);GO:0003824(catalytic activity);GO:0005506(iron ion binding);GO:0005783(endoplasmic reticulum);GO:0005789(endoplasmic reticulum membrane);GO:0005794(Golgi apparatus);GO:0009640(photomorphogenesis);GO:0016021(integral component of membrane);GO:0042284(sphingolipid delta-4 desaturase activity);GO:0046520(sphingoid biosynthetic process);GO:0055114(oxidatio…	00600(Sphingolipid metabolism)	K04713	EC:1.14.18.5	Sphinganine C4-monooxygenase [Actinidia chinensis var. chinensis]	NA	47.3472	41.9892	57.9407	41.4263	35.7884	38.0909	30.5734	49.8675	50.0722	31.5839	24.9764	27.7309	15.7037	14.3519	21.0045	28.4685	17.3179	30.5572	3603	3545	4379	3824	3143	3460	2537	3149	3851	2533	2345	2365	1351	1328	1778	2268	1392	2625
gene-GIB67_000526	JACGCM010001471.1	461043	468642	+	GIB67_000526	22497	rna-gnl|WGS:JACGCM|KingUnif33877.1	GO:0003746(translation elongation factor activity);GO:0005634(nucleus);GO:0006357(regulation of transcription by RNA polymerase II);GO:0006368(transcription elongation from RNA polymerase II promoter);GO:0006414(translational elongation);GO:0070449(elongin complex)	NA	NA	NA	PREDICTED: transcription elongation factor B polypeptide 3 [Nelumbo nucifera]	NA	10.066	9.03473	7.70937	37.341	34.9742	31.6376	22.1947	20.7023	13.5605	20.4744	69.3791	59.2065	14.8952	19.0442	24.7827	23.2332	28.5663	10.0661	881	878	671	3965	3533	3305	2118	1504	1200	1889	7492	5807	1474	2027	2413	2129	2640	995
gene-GIB67_000527	JACGCM010001471.1	469269	487498	+	GIB67_000527	22498	rna-gnl|WGS:JACGCM|KingUnif00430.1	GO:0005739(mitochondrion);GO:0016021(integral component of membrane);GO:0016757(transferase activity, transferring glycosyl groups)	NA	NA	NA	uncharacterized protein LOC113298007 isoform X2 [Papaver somniferum]	NA	3.35258	3.55273	3.43049	2.98307	3.14256	2.72152	4.08081	3.85311	5.09475	4.40764	2.85826	4.43916	5.96861	2.60315	6.28757	5.76651	6.83735	6.26508	302	355	307	326	326	292	400	288	463	418	317	448	607	285	629	543	649	636
gene-GIB67_000529	JACGCM010001471.1	534833	539727	+	GIB67_000529	22500	rna-gnl|WGS:JACGCM|KingUnif02468.1	GO:0003674(molecular_function);GO:0008150(biological_process)	NA	NA	NA	Ran-interacting Mog1 protein [Macleaya cordata]	NA	283.291	211.651	130.684	17.1051	10.2237	9.51123	29.2541	26.5075	44.5514	87.8947	19.9895	19.0639	13.6341	3.69294	11.4568	12.5512	16.8613	41.0209	14302	11854	6554	1048	596	574	1611	1111	2274	4676	1246	1079	778	227	644	664	899	2338
gene-GIB67_000530	JACGCM010001471.1	516290	518317	-	GIB67_000530	22499	rna-gnl|WGS:JACGCM|KingUnif38210.1	GO:0031461(cullin-RING ubiquitin ligase complex);GO:0031625(ubiquitin protein ligase binding);GO:0061630(ubiquitin protein ligase activity)	04120(Ubiquitin mediated proteolysis)	K03869	NA	Cullin [Macleaya cordata]	NA	13.5037	14.8873	6.99178	12.5756	10.6609	9.71863	9.07779	12.3642	10.6088	9.67754	15.1455	9.75331	9.31223	9.37903	7.14109	6.17388	7.04233	9.75741	1505	1840	774	1700	1371	1293	1103	1143	1195	1137	2083	1218	1173	1271	886	720	829	1228
gene-GIB67_000531	JACGCM010001471.1	608274	609413	+	GIB67_000531	22501	rna-gnl|WGS:JACGCM|KingUnif11648.1	GO:0003677(DNA binding);GO:0003700(DNA binding transcription factor activity);GO:0005515(protein binding);GO:0005634(nucleus);GO:0006351(transcription, DNA-templated);GO:0006355(regulation of transcription, DNA-templated);GO:0008283(cell proliferation);GO:0009735(response to cytokinin);GO:0009737(response to abscisic acid);GO:0009739(response to gibberellin);GO:0010029(regulation of seed germinat…	04712(Circadian rhythm - plant)	K16221	NA	PREDICTED: transcription factor TCP15-like isoform X1 [Nelumbo nucifera]	NA	4.23555	3.55572	3.02596	29.56	29.6512	32.006	8.1507	3.6791	7.53353	5.41959	6.41685	11.1966	5.2875	1.33287	7.67163	0.883774	0.763424	0.055266	266	248	189	2246	2144	2393	557	192	477	358	496	786	375	102	535	58	51	4
gene-GIB67_000535	JACGCM010001471.1	879373	888417	-	GIB67_000535	22507	rna-gnl|WGS:JACGCM|KingUnif04233.1	GO:0005634(nucleus)	NA	NA	NA	hypothetical protein AQUCO_00200564v1 [Aquilegia coerulea]	NA	20.0657	22.8521	13.084	13.2302	13.8344	14.4506	10.9849	16.4088	13.1191	15.7052	44.3041	21.0511	16.0542	12.2213	15.4706	9.98851	10.2496	10.9381	968	1223	627	775	771	832	578	657	640	799	2637	1138	876	717	831	505	522	596
gene-GIB67_000538	JACGCM010001471.1	897634	899610	+	GIB67_000538	22508	rna-gnl|WGS:JACGCM|KingUnif19027.1	GO:0000462(maturation of SSU-rRNA from tricistronic rRNA transcript (SSU-rRNA, 5.8S rRNA, LSU-rRNA));GO:0005730(nucleolus);GO:0032040(small-subunit processome)	NA	NA	NA	something about silencing protein 10 [Prunus persica]	NA	6.95642	7.35032	6.51162	14.2725	16.5813	14.8702	14.7907	18.8932	13.7971	9.32673	19.4869	13.484	10.5862	7.38139	18.2295	7.10055	13.1148	7.31174	756	886	703	1881	2079	1928	1752	1703	1515	1068	2612	1642	1300	975	2203	808	1504	897
gene-GIB67_000539	JACGCM010001471.1	973086	981088	-	GIB67_000539	22509	rna-gnl|WGS:JACGCM|KingUnif31924.1	GO:0003674(molecular_function);GO:0008150(biological_process);GO:0009507(chloroplast);GO:0016021(integral component of membrane)	NA	NA	NA	hypothetical protein AQUCO_00200565v1 [Aquilegia coerulea]	NA	14.7229	14.3915	15.1505	13.8873	14.1773	8.8956	24.8995	24.0047	24.9564	18.0557	19.2104	17.3805	17.2896	13.2726	13.1296	23.9263	29.052	16.8646	1246	1351	1274	1426	1385	899	2297	1686	2135	1610	2006	1648	1653	1366	1236	2119	2596	1611
gene-GIB67_000540	JACGCM010001471.1	1032282	1041375	+	GIB67_000540	22510	rna-gnl|WGS:JACGCM|KingUnif33011.1	GO:0003682(chromatin binding);GO:0005634(nucleus);GO:0005886(plasma membrane);GO:0008270(zinc ion binding);GO:0008536(Ran GTPase binding)	04120(Ubiquitin mediated proteolysis)	K10615	EC:2.3.2.26	FYVE zinc finger [Macleaya cordata]	NA	3.59477	2.32405	3.00798	3.46819	3.20058	3.7428	2.94011	5.53856	4.05225	2.75197	3.09094	4.76611	6.04193	2.97844	5.13691	2.0431	2.57422	3.15063	570	409	474	668	586	709	509	729	650	460	605	847	1083	575	906	340	431	564
gene-GIB67_000541	JACGCM010001471.1	1052623	1061235	-	GIB67_000541	22511	rna-gnl|WGS:JACGCM|KingUnif07035.1	GO:0000723(telomere maintenance);GO:0003677(DNA binding);GO:0003700(DNA binding transcription factor activity);GO:0005515(protein binding);GO:0005634(nucleus);GO:0006351(transcription, DNA-templated);GO:0006355(regulation of transcription, DNA-templated);GO:0007389(pattern specification process);GO:0009734(auxin-activated signaling pathway);GO:0009873(ethylene-activated signaling pathway);GO:0010…	NA	NA	NA	AP2/ERF domain [Macleaya cordata]	NA	8.22776	9.6062	7.54228	13.9067	17.1957	14.6332	10.4087	9.10585	9.59926	8.24202	21.0282	15.7408	9.56961	7.08896	13.5396	9.62347	10.2756	7.75525	780	1010	710	1599	1881	1656	1076	717	920	824	2459	1672	1025	817	1428	955	1029	830
gene-GIB67_000543	JACGCM010001471.1	1099203	1111336	-	GIB67_000543	22512	rna-gnl|WGS:JACGCM|KingUnif39050.1	GO:0000922(spindle pole);GO:0005634(nucleus);GO:0005737(cytoplasm);GO:0005815(microtubule organizing center);GO:0005819(spindle);GO:0005874(microtubule);GO:0007049(cell cycle);GO:0008017(microtubule binding);GO:0009524(phragmoplast);GO:0009652(thigmotropism);GO:0009958(positive gravitropism);GO:0010005(cortical microtubule, transverse to long axis);GO:0051301(cell division)	NA	NA	NA	Calponin homology domain [Macleaya cordata]	NA	4.93977	5.51646	4.62912	9.12072	9.07905	6.80824	7.73072	7.91907	6.20782	5.57959	12.1874	9.92118	20.3861	14.116	22.7093	13.5325	17.9948	10.446	384	475	357	859	813	631	654	510	487	457	1167	863	1788	1332	1960	1099	1474	915
gene-GIB67_000544	JACGCM010001471.1	1211639	1216489	+	GIB67_000544	22515	rna-gnl|WGS:JACGCM|KingUnif27566.1	GO:0003735(structural constituent of ribosome);GO:0019843(rRNA binding);GO:0022627(cytosolic small ribosomal subunit);GO:0045903(positive regulation of translational fidelity)	03010(Ribosome)	K02997	NA	hypothetical protein CRG98_041898 [Punica granatum]	NA	323.467	315.681	222.739	170.331	224.517	171.216	457.907	530.235	439.656	482.602	544.104	296.202	1034.93	657.183	918.205	678.039	534.416	353.468	18783	20335	12847	11999	15047	11868	28994	25548	25804	29530	38985	19275	67913	46393	59311	41211	32765	23167
gene-GIB67_000545	JACGCM010001471.1	1246565	1247071	+	GIB67_000545	22517	rna-gnl|WGS:JACGCM|KingUnif21418.1	GO:0003989(acetyl-CoA carboxylase activity);GO:0006633(fatty acid biosynthetic process);GO:0009317(acetyl-CoA carboxylase complex)	00620(Pyruvate metabolism);00640(Propanoate metabolism);00061(Fatty acid biosynthesis)	K01963	EC:6.4.1.2;EC:2.1.3.15	acetyl-CoA carboxylase beta subunit (chloroplast) [Kingdonia uniflora]	NA	4.34253	4.01622	3.85771	7.42173	6.75537	3.96768	7.3053	6.65505	9.84343	3.49137	2.00222	2.19377	4.33268	2.52179	5.99443	11.0378	9.27751	6.42055	121	125	107	251	218	132	222	154	278	103	69	69	137	86	186	322	273	202
gene-GIB67_000547	JACGCM010001471.1	1241131	1241607	-	GIB67_000547	22516	rna-gnl|WGS:JACGCM|KingUnif32727.1	GO:0003674(molecular_function);GO:0005634(nucleus);GO:0008150(biological_process)	NA	NA	NA	uncharacterized protein LOC110814475 [Carica papaya]	NA	47.6781	16.9945	46.455	251.891	152.311	154.527	178.562	149.59	100.658	31.1209	52.1213	164.24	55.9925	90.8542	77.2776	129.983	103.809	35.9265	1250	495	1210	8008	4607	4834	5103	3253	2667	860	1686	4824	1659	2895	2253	3566	2873	1063
gene-GIB67_000548	JACGCM010001471.1	1428223	1430178	-	GIB67_000548	22521	rna-gnl|WGS:JACGCM|KingUnif32198.1	GO:0005515(protein binding);GO:0005634(nucleus);GO:0007049(cell cycle);GO:0016538(cyclin-dependent protein serine/threonine kinase regulator activity);GO:0051301(cell division);GO:0051726(regulation of cell cycle)	NA	NA	NA	hypothetical protein AQUCO_02500226v1 [Aquilegia coerulea]	NA	0.249792	0.129451	0	0.024592	0	0.052316	0.086947	0	0	0.719177	0.043233	0.04873	4.5443	10.459	5.8064	9.09704	0.984148	5.34328	14	8	0	2	0	4	5	0	0	40	3	3	271	671	341	503	55	319
gene-GIB67_000555	JACGCM010001471.1	1772667	1778668	+	GIB67_000555	22531	rna-gnl|WGS:JACGCM|KingUnif29979.1	GO:0003735(structural constituent of ribosome);GO:0006412(translation);GO:0022627(cytosolic small ribosomal subunit)	03010(Ribosome)	K02987	NA	40S ribosomal S4 [Gossypium arboreum]	NA	5.94588	9.04477	4.96979	2.50613	2.1355	1.42796	8.57524	4.99736	10.172	7.42203	1.82487	2.05696	6.99796	3.27797	5.70983	8.87606	10.0181	9.51432	547	922	454	280	227	157	859	381	945	719	207	212	727	367	584	854	972	987
gene-GIB67_000556	JACGCM010001471.1	1781862	1784150	+	GIB67_000556	22532	rna-gnl|WGS:JACGCM|KingUnif22276.1	GO:0004365(glyceraldehyde-3-phosphate dehydrogenase (NAD+) (phosphorylating) activity);GO:0005829(cytosol);GO:0006006(glucose metabolic process);GO:0006096(glycolytic process);GO:0009409(response to cold);GO:0009416(response to light stimulus);GO:0009507(chloroplast);GO:0009535(chloroplast thylakoid membrane);GO:0009570(chloroplast stroma);GO:0009744(response to sucrose);GO:0009941(chloroplast en…	00710(Carbon fixation in photosynthetic organisms)	K05298	EC:1.2.1.13	glyceraldehyde-3-phosphate dehydrogenase B, chloroplastic isoform X2 [Cucurbita moschata]	NA	5.18863	6.89239	3.17611	7.82161	8.48076	2.69088	19.6066	6.33638	19.6967	6.4575	2.74002	6.44989	7.47004	6.31496	7.74273	18.895	21.1064	4.83212	392	577	238	716	739	243	1613	397	1502	514	256	546	637	580	650	1492	1681	412
gene-GIB67_000558	JACGCM010001471.1	1704513	1707965	+	GIB67_000558	22525	rna-gnl|WGS:JACGCM|KingUnif04455.1	GO:0003676(nucleic acid binding);GO:0006364(rRNA processing);GO:0009409(response to cold);GO:0009507(chloroplast);GO:0009536(plastid);GO:0019843(rRNA binding);GO:0032544(plastid translation)	NA	NA	NA	hypothetical protein CUMW_022190 [Citrus unshiu]	NA	18.2357	15.5467	26.1807	18.9454	19.8397	18.4681	22.7754	17.7247	19.5993	7.29676	5.35305	9.3422	8.05124	3.74744	8.45225	4.90179	6.66546	4.18809	1299	1228	1852	1637	1631	1570	1769	1048	1411	548	471	746	648	325	670	366	502	337
gene-GIB67_000559	JACGCM010001471.1	1725379	1725836	-	GIB67_000559	22526	rna-gnl|WGS:JACGCM|KingUnif14297.1	GO:0005982(starch metabolic process);GO:0005985(sucrose metabolic process);GO:0005986(sucrose biosynthetic process);GO:0008194(UDP-glycosyltransferase activity);GO:0009414(response to water deprivation);GO:0009507(chloroplast);GO:0010431(seed maturation);GO:0010555(response to mannitol);GO:0016157(sucrose synthase activity);GO:0016757(transferase activity, transferring glycosyl groups)	00500(Starch and sucrose metabolism)	K00695	EC:2.4.1.13	PREDICTED: sucrose synthase [Nelumbo nucifera]	NA	0	0	0	0	0.096302	0	0	0	0	0	0	0	0	0	0	0	0	0	0	0	0	0	2	0	0	0	0	0	0	0	0	0	0	0	0	0
gene-GIB67_000561	JACGCM010001471.1	1703758	1704180	-	GIB67_000561	22524	rna-gnl|WGS:JACGCM|KingUnif23102.1	NA	NA	NA	NA		NA	0	0	0	0.236166	0.141019	0	0	0	0.395507	0	0	0	0	0.103344	0	0.196413	0.070314	0.329711	0	0	0	5	3	0	0	0	6	0	0	0	0	2	0	3	2	6
gene-GIB67_000563	JACGCM010001471.1	1825930	1829721	+	GIB67_000563	22533	rna-gnl|WGS:JACGCM|KingUnif31433.1	GO:0003674(molecular_function);GO:0005575(cellular_component);GO:0008150(biological_process)	NA	NA	NA	uncharacterized protein LOC110622176 [Manihot esculenta]	NA	9.24075	11.2327	7.5793	5.07865	4.97824	3.64988	10.8809	10.3463	9.03609	12.4318	7.52337	4.51593	11.3773	3.6033	10.4715	11.088	9.7214	10.4708	510	687	415	340	317	241	654	474	504	722	512	279	709	242	642	640	566	652
gene-GIB67_000565	JACGCM010001471.1	1830480	1832866	-	GIB67_000565	22534	rna-gnl|WGS:JACGCM|KingUnif02953.1	GO:0000427(plastid-encoded plastid RNA polymerase complex);GO:0003677(DNA binding);GO:0005515(protein binding);GO:0006351(transcription, DNA-templated);GO:0006355(regulation of transcription, DNA-templated);GO:0009642(response to light intensity);GO:0010468(regulation of gene expression);GO:0042644(chloroplast nucleoid);GO:0042646(plastid nucleoid)	NA	NA	NA	PREDICTED: uncharacterized protein LOC104607939 [Nelumbo nucifera]	NA	25.8417	19.6017	18.1358	12.8503	22.7549	12.4127	25.1116	30.1006	25.4019	15.848	7.77352	8.88803	69.1458	7.39425	40.2576	19.9371	17.7934	16.11	1172	986	817	707	1191	672	1242	1132	1164	757	435	452	3542	408	2030	946	852	825
gene-GIB67_000567	JACGCM010001471.1	1966082	1986673	+	GIB67_000567	22539	rna-gnl|WGS:JACGCM|KingUnif31372.1	GO:0005783(endoplasmic reticulum)	NA	NA	NA	extended synaptotagmin-1 [Olea europaea var. sylvestris]	NA	3.09348	5.73451	1.96371	1.43125	1.60665	0.984795	2.04778	1.56311	5.02578	2.20743	0.805228	0.730501	1.45691	1.25885	1.17577	2.88389	3.5455	1.56088	352	724	222	198	211	134	254	148	578	265	113	94	188	175	149	344	426	201
gene-GIB67_000568	JACGCM010001471.1	1918010	1922440	-	GIB67_000568	22537	rna-gnl|WGS:JACGCM|KingUnif26549.1	GO:0003677(DNA binding);GO:0003887(DNA-directed DNA polymerase activity);GO:0005515(protein binding);GO:0005634(nucleus);GO:0006260(DNA replication);GO:0006281(DNA repair);GO:0006289(nucleotide-excision repair);GO:0006302(double-strand break repair);GO:0006303(double-strand break repair via nonhomologous end joining);GO:0010224(response to UV-B);GO:0071897(DNA biosynthetic process)	03410(Base excision repair);03450(Non-homologous end-joining)	K03512	EC:2.7.7.7;EC:4.2.99.-	BRCT domain [Macleaya cordata]	NA	0.702388	0.524888	0.197924	1.63037	1.63572	1.87508	1.53483	2.01532	1.99357	0.96417	2.40476	2.45136	2.98689	1.49976	3.51184	0.940173	2.56647	0.142672	49	41	14	138	131	156	117	117	140	71	206	191	235	127	272	69	189	12
gene-GIB67_000570	JACGCM010001471.1	2047779	2053561	+	GIB67_000570	22543	rna-gnl|WGS:JACGCM|KingUnif19442.1	GO:0005515(protein binding);GO:0005739(mitochondrion);GO:0009507(chloroplast);GO:0015035(protein disulfide oxidoreductase activity);GO:0042246(tissue regeneration)	NA	NA	NA	hypothetical protein AQUCO_00200303v1 [Aquilegia coerulea]	NA	17.3025	6.22676	23.2515	24.4335	26.4322	26.807	7.03029	9.84687	13.8131	1.61211	0.648239	1.13902	1.92074	1.29001	2.73951	3.87818	2.96298	1.55079	1189	475	1586	2036	2095	2198	527	562	959	117	55	88	150	108	210	279	215	121
gene-GIB67_000571	JACGCM010001471.1	2098176	2106501	+	GIB67_000571	22548	rna-gnl|WGS:JACGCM|KingUnif40686.1	GO:0005524(ATP binding);GO:0005737(cytoplasm);GO:0009408(response to heat);GO:0009507(chloroplast);GO:0009532(plastid stroma);GO:0009570(chloroplast stroma);GO:0009658(chloroplast organization);GO:0016485(protein processing);GO:0016887(ATPase activity)	NA	NA	NA	chaperone protein ClpB3, chloroplastic [Quercus suber]	NA	0.063228	0.249739	0	0	0	0	0	0	0	0	0	0	0	0	0	0	0	0	3	11	0	0	0	0	0	0	0	0	0	0	0	0	0	0	0	0
gene-GIB67_000572	JACGCM010001471.1	2009166	2009626	+	GIB67_000572	22540	rna-gnl|WGS:JACGCM|KingUnif01833.1	NA	NA	NA	NA		NA	0	1.3862	0.206582	0.504534	0	0	0.44732	0	0.662966	0	0	0	0.755847	0.106572	0	0.150103	0	0.429539	0	35	5	14	0	0	12	0	16	0	0	0	20	3	0	4	0	12
gene-GIB67_000573	JACGCM010001471.1	2054722	2055716	+	GIB67_000573	22544	rna-gnl|WGS:JACGCM|KingUnif29008.1	NA	NA	NA	NA	hypothetical protein C5167_001414 [Papaver somniferum]	NA	0.201927	0.241797	0	0.158203	0.857428	0.956509	0.154891	0	0.414656	0	0	0.22908	0.077495	0.05557	0.215034	0	0	0	11	15	0	11	53	61	9	0	23	0	0	14	5	4	13	0	0	0
gene-GIB67_000574	JACGCM010001471.1	2027258	2031673	-	GIB67_000574	22542	rna-gnl|WGS:JACGCM|KingUnif04495.1	GO:0003700(DNA binding transcription factor activity);GO:0003729(mRNA binding);GO:0005737(cytoplasm);GO:0005856(cytoskeleton);GO:0005886(plasma membrane);GO:0046872(metal ion binding);GO:0051015(actin filament binding);GO:0051017(actin filament bundle assembly)	NA	NA	NA	hypothetical protein AQUCO_00200301v1 [Aquilegia coerulea]	NA	51.5674	31.526	30.3925	83.476	80.5363	85.3474	85.695	81.8876	60.3169	109.448	122.374	141.353	79.6314	157.856	120.171	177.678	181.015	134.165	2842	1928	1664	5580	5122	5614	5149	3744	3360	6355	8321	8729	4959	10575	7366	10248	10531	8345
gene-GIB67_000575	JACGCM010001471.1	2058046	2068399	-	GIB67_000575	22546	rna-gnl|WGS:JACGCM|KingUnif25460.1	GO:0003677(DNA binding);GO:0005516(calmodulin binding);GO:0005634(nucleus);GO:0006351(transcription, DNA-templated);GO:0006355(regulation of transcription, DNA-templated);GO:0006950(response to stress)	NA	NA	NA	PREDICTED: calmodulin-binding protein 60 A-like [Nelumbo nucifera]	NA	10.7685	9.85008	10.9579	16.3447	17.3656	17.7508	14.3353	17.3445	17.6448	10.8355	9.88474	10.1621	11.1729	6.35425	7.69314	7.90536	7.99671	9.22829	1425	1446	1440	2623	2652	2803	2068	1904	2360	1511	1614	1507	1671	1022	1133	1095	1117	1378
gene-GIB67_000576	JACGCM010001471.1	2056577	2057039	-	GIB67_000576	22545	rna-gnl|WGS:JACGCM|KingUnif25011.1	NA	NA	NA	NA		NA	0	0.281651	0.275358	0.156774	0	0.538684	0	0.825114	0	0	0	0	0	0	0	0	0	0	0	5	5	3	0	10	0	11	0	0	0	0	0	0	0	0	0	0
gene-GIB67_000577	JACGCM010001471.1	2090283	2091578	-	GIB67_000577	22547	rna-gnl|WGS:JACGCM|KingUnif36755.1	NA	NA	NA	NA		NA	1.25391	1.42297	0.373098	0.965574	1.53282	1.54295	0.147441	1.49318	1.63976	0.804677	0	0.537841	2.52287	0.440641	3.19184	2.12781	1.05354	3.66759	27	34	8	26	38	40	4	27	36	19	0	13	62	12	77	48	24	89
gene-GIB67_000578	JACGCM010001471.1	2025515	2026189	-	GIB67_000578	22541	rna-gnl|WGS:JACGCM|KingUnif03448.1	GO:0000149(SNARE binding);GO:0005484(SNAP receptor activity);GO:0006887(exocytosis);GO:0006906(vesicle fusion);GO:0031201(SNARE complex)	NA	NA	NA	hypothetical protein AQUCO_03700202v1 [Aquilegia coerulea]	NA	1.52855	2.20346	2.50982	5.83149	4.74544	4.59776	3.93299	5.77158	2.99432	2.23879	11.3587	7.05045	5.02658	11.7088	4.32552	5.519	5.19958	3.36433	57	91	93	263	204	204	160	178	113	88	520	293	211	528	179	215	204	141
gene-GIB67_000583	JACGCM010000332.1	63009	73959	+	GIB67_000583	3494	rna-gnl|WGS:JACGCM|KingUnif15374.1	GO:0005634(nucleus);GO:0005829(cytosol);GO:0009295(nucleoid);GO:0009507(chloroplast);GO:0009508(plastid chromosome);GO:0009570(chloroplast stroma)	NA	NA	NA	PREDICTED: protein PLASTID TRANSCRIPTIONALLY ACTIVE 10 isoform X1 [Nelumbo nucifera]	NA	11.0692	11.2566	10.1367	9.60004	11.1879	10.1769	14.9893	11.7347	13.7988	4.22029	6.58888	8.81918	15.9442	2.36792	15.0462	2.50345	5.1774	1.75919	1403	1583	1277	1476	1637	1540	2072	1235	1768	564	1031	1253	2284	365	2122	333	693	252
gene-GIB67_000586	JACGCM010000332.1	77751	85961	-	GIB67_000586	3496	rna-gnl|WGS:JACGCM|KingUnif39391.1	GO:0003677(DNA binding);GO:0005634(nucleus);GO:0006351(transcription, DNA-templated);GO:0006355(regulation of transcription, DNA-templated);GO:0009507(chloroplast)	NA	NA	NA	Bromodomain [Macleaya cordata]	NA	12.6904	14.3286	11.7205	19.8621	19.2446	18.0259	13.7019	18.123	17.4741	14.8284	18.0565	16.0628	19.0481	12.0913	18.3662	7.22197	10.6708	9.52061	2229	2791	2044	4231	3900	3778	2624	2641	3101	2744	3912	3161	3780	2581	3588	1328	1979	1887
gene-GIB67_000588	JACGCM010000332.1	74219	77626	-	GIB67_000588	3495	rna-gnl|WGS:JACGCM|KingUnif17781.1	GO:0004316(3-oxoacyl-[acyl-carrier-protein] reductase (NADPH) activity);GO:0005507(copper ion binding);GO:0006633(fatty acid biosynthetic process);GO:0009507(chloroplast);GO:0009536(plastid);GO:0009570(chloroplast stroma);GO:0009941(chloroplast envelope);GO:0051287(NAD binding);GO:0055114(oxidation-reduction process);GO:0102131(3-oxo-glutaryl-[acp] methyl ester reductase activity);GO:0102132(3-ox…	00061(Fatty acid biosynthesis);01040(Biosynthesis of unsaturated fatty acids);00780(Biotin metabolism);00333(Prodigiosin biosyntheses)	K00059	EC:1.1.1.100	Short-chain dehydrogenase/reductase SDR [Macleaya cordata]	NA	22.4837	20.9669	24.0799	13.1035	18.7944	15.6089	38.9673	32.6056	27.4155	18.9983	15.6774	13.4008	63.4619	28.5353	69.225	52.9539	54.2608	30.5935	1732	1792	1843	1225	1671	1435	3273	2084	2135	1542	1490	1157	5524	2672	5932	4270	4413	2660
gene-GIB67_000590	JACGCM010000332.1	172602	174556	+	GIB67_000590	3498	rna-gnl|WGS:JACGCM|KingUnif19505.1	GO:0003674(molecular_function);GO:0008150(biological_process)	NA	NA	NA	Protein of unknown function DUF810 [Macleaya cordata]	NA	0.692866	0.983195	0.420859	1.58643	0.130652	0.325488	0	0.156601	0.276454	1.02223	0.102228	0.136779	0.503104	0.081863	0	0	0	0.025325	71	111	43	196	16	40	0	14	29	110	13	16	58	11	0	0	0	3
gene-GIB67_000591	JACGCM010000332.1	126042	133867	+	GIB67_000591	3497	rna-gnl|WGS:JACGCM|KingUnif33965.1	GO:0004798(thymidylate kinase activity);GO:0005634(nucleus);GO:0005739(mitochondrion);GO:0005829(cytosol);GO:0006227(dUDP biosynthetic process);GO:0006233(dTDP biosynthetic process);GO:0006235(dTTP biosynthetic process);GO:0009041(uridylate kinase activity)	00240(Pyrimidine metabolism)	K00943	EC:2.7.4.9	PREDICTED: thymidylate kinase isoform X1 [Nelumbo nucifera]	NA	5.41219	5.98707	3.17	2.26641	1.82143	1.6116	4.13194	6.52561	3.5606	10.321	4.73939	2.87874	11.9361	3.83011	9.09972	8.02208	9.41082	5.46978	361	443	210	184	141	129	301	362	241	726	391	216	900	311	676	560	663	412
gene-GIB67_000592	JACGCM010000332.1	204379	205305	-	GIB67_000592	3500	rna-gnl|WGS:JACGCM|KingUnif31911.1	GO:0008150(biological_process)	NA	NA	NA	PREDICTED: uncharacterized protein LOC104591649 [Nelumbo nucifera]	NA	63.4067	23.9385	17.138	8.42339	2.30369	1.92323	1.83999	5.92291	4.83911	61.3707	19.4184	3.44326	76.0413	7.89823	91.1263	0.214867	3.67674	0.507301	3229	1353	867	521	136	117	103	251	250	3294	1221	197	4377	489	5163	12	198	30
gene-GIB67_000594	JACGCM010000201.1	29783	47970	-	GIB67_000594	1889	rna-gnl|WGS:JACGCM|KingUnif39231.1	GO:0004157(dihydropyrimidinase activity);GO:0005783(endoplasmic reticulum);GO:0005794(Golgi apparatus);GO:0006212(uracil catabolic process);GO:0012505(endomembrane system);GO:0019483(beta-alanine biosynthetic process);GO:0043562(cellular response to nitrogen levels);GO:0046872(metal ion binding)	00240(Pyrimidine metabolism);00410(beta-Alanine metabolism);00770(Pantothenate and CoA biosynthesis)	K01464	EC:3.5.2.2	hypothetical protein BVC80_417g18 [Macleaya cordata]	NA	33.2671	31.2424	31.5101	46.1009	39.4328	30.2366	57.4457	49.9609	52.2553	33.3207	21.9811	27.1815	13.4115	10.6387	14.7758	43.95	35.5353	39.8525	4946	5153	4653	8314	6766	5366	9312	6163	7852	5220	4032	4529	2254	1923	2444	6839	5578	6687
gene-GIB67_000595	JACGCM010000201.1	121774	129120	+	GIB67_000595	1891	rna-gnl|WGS:JACGCM|KingUnif10958.1	GO:0003824(catalytic activity);GO:0005739(mitochondrion);GO:0005747(mitochondrial respiratory chain complex I);GO:0016020(membrane);GO:0055114(oxidation-reduction process)	00190(Oxidative phosphorylation)	K03950	NA	hypothetical protein GOBAR_DD26347 [Gossypium barbadense]	NA	42.3813	47.6875	47.6928	53.9535	55.426	49.8302	67.0389	52.6751	50.3631	71.3122	50.7115	52.5711	55.1605	45.21	61.8394	101.754	80.7993	82.5939	1886	2354	2108	2913	2847	2647	3253	1945	2266	3344	2785	2622	2774	2446	3062	4740	3797	4149
gene-GIB67_000596	JACGCM010000201.1	94833	121141	+	GIB67_000596	1890	rna-gnl|WGS:JACGCM|KingUnif22447.1	GO:0003918(DNA topoisomerase type II (ATP-hydrolyzing) activity);GO:0006265(DNA topological change);GO:0006268(DNA unwinding involved in DNA replication);GO:0007059(chromosome segregation);GO:0009295(nucleoid);GO:0009330(DNA topoisomerase complex (ATP-hydrolyzing))	NA	NA	NA	PREDICTED: DNA gyrase subunit B, chloroplastic/mitochondrial-like [Nelumbo nucifera]	NA	12.9741	12.4618	16.6087	9.71033	13.2487	9.51417	22.1999	17.6479	21.7106	4.40955	9.2713	5.48451	21.9182	4.49208	23.2932	5.9979	7.68283	3.81669	1999	2130	2542	1815	2356	1750	3729	2256	3381	716	1763	947	3816	842	3992	968	1250	664
gene-GIB67_000597	JACGCM010000201.1	140293	141564	+	GIB67_000597	1893	rna-gnl|WGS:JACGCM|KingUnif38622.1	NA	NA	NA	NA	hypothetical protein AQUCO_02900100v1 [Aquilegia coerulea]	NA	0.25091	0	0	0	0	0	0	0	0	0	0	0	0	0	0	0	0	0	10	0	0	0	0	0	0	0	0	0	0	0	0	0	0	0	0	0
gene-GIB67_000598	JACGCM010000201.1	129702	138389	-	GIB67_000598	1892	rna-gnl|WGS:JACGCM|KingUnif00551.1	GO:0004252(serine-type endopeptidase activity);GO:0008150(biological_process);GO:0016021(integral component of membrane)	NA	NA	NA	hypothetical protein AQUCO_00400762v1 [Aquilegia coerulea]	NA	17.7469	13.4667	15.3556	26.6948	28.1541	23.5206	32.0544	27.7775	27.6815	18.3772	30.1047	29.8704	15.4691	22.9398	26.241	30.4816	21.0581	23.4507	1400	1178	1203	2553	2562	2214	2756	1818	2206	1527	2929	2639	1379	2199	2302	2516	1753	2087
gene-GIB67_000599	JACGCM010000201.1	286309	289103	+	GIB67_000599	1904	rna-gnl|WGS:JACGCM|KingUnif04857.1	GO:0005759(mitochondrial matrix);GO:0006986(response to unfolded protein);GO:0046872(metal ion binding);GO:0051082(unfolded protein binding);GO:0051085(chaperone cofactor-dependent protein refolding);GO:0051087(chaperone binding)	NA	NA	NA	10 kDa chaperonin, mitochondrial-like isoform X1 [Durio zibethinus]	NA	47.443	45.3206	22.1417	18.7035	32.596	16.2962	132.751	103.153	99.4472	112.924	115.252	39.2051	465.231	103.83	413.699	174.07	246.775	92.6215	1468	1555	681	702	1164	602	4478	2648	3109	3681	4399	1359	16261	3905	14234	5636	8059	3234
gene-GIB67_000600	JACGCM010000201.1	245919	247394	+	GIB67_000600	1900	rna-gnl|WGS:JACGCM|KingUnif20515.1	NA	NA	NA	NA	Holliday junction resolvase MOC1, chloroplastic-like [Papaver somniferum]	NA	17.8409	16.3453	9.52484	16.4326	14.7888	10.9296	16.9571	13.789	15.9131	12.3185	11.9923	16.1396	33.4742	7.13278	22.863	20.56	23.1974	16.2397	588	597	312	656	562	430	609	377	530	428	487	596	1245	286	837	709	806	604
gene-GIB67_000601	JACGCM010000201.1	234235	236301	+	GIB67_000601	1898	rna-gnl|WGS:JACGCM|KingUnif30577.1	GO:0003676(nucleic acid binding);GO:0005634(nucleus);GO:0008150(biological_process)	NA	NA	NA	hypothetical protein BVC80_1467g15 [Macleaya cordata]	NA	12.2952	10.3055	6.39752	9.03013	10.0126	8.68856	12.6541	9.4398	8.46083	7.14753	13.0962	8.65542	27.684	4.84585	20.3614	11.452	13.903	11.6896	424	394	219	378	399	358	476	270	295	260	557	335	1078	203	781	413	506	455
gene-GIB67_000603	JACGCM010000201.1	239241	239609	+	GIB67_000603	1899	rna-gnl|WGS:JACGCM|KingUnif42078.1	NA	NA	NA	NA		NA	0	0	0	0	0	0	0	0	0	0	0.434498	0	0	0	0	0	0	0	0	0	0	0	0	0	0	0	0	0	8	0	0	0	0	0	0	0
gene-GIB67_000605	JACGCM010000201.1	221611	224056	-	GIB67_000605	1897	rna-gnl|WGS:JACGCM|KingUnif02843.1	NA	NA	NA	NA	hypothetical protein BVC80_1467g6 [Macleaya cordata]	NA	7.83312	5.16428	6.04361	57.3167	58.959	48.7078	17.7599	16.4355	18.5071	9.35034	46.2524	27.8817	7.13166	9.20942	10.6974	6.5904	3.02187	10.474	765	560	586	6788	6643	5676	1891	1332	1827	962	5572	3051	787	1093	1162	674	312	1155
gene-GIB67_000606	JACGCM010000201.1	209361	211070	-	GIB67_000606	1894	rna-gnl|WGS:JACGCM|KingUnif32680.1	GO:0005634(nucleus)	NA	NA	NA	hypothetical protein AQUCO_00400755v1 [Aquilegia coerulea]	NA	24.4969	27.9966	26.5243	35.7401	40.9772	28.5878	38.1822	33.2555	50.1448	25.0353	31.6368	37.6268	23.8449	23.6537	25.212	34.7847	34.357	29.4039	1244	1577	1338	2201	2401	1733	2114	1401	2573	1340	1982	2141	1368	1460	1424	1849	1842	1685
gene-GIB67_000607	JACGCM010000201.1	248328	255546	-	GIB67_000607	1901	rna-gnl|WGS:JACGCM|KingUnif17375.1	GO:0005737(cytoplasm)	NA	NA	NA	hypothetical protein AQUCO_00400749v1 [Aquilegia coerulea]	NA	2.64274	5.60051	2.17273	2.93245	3.90163	1.16258	7.28938	3.4956	8.44396	5.06571	0	0.8912	9.25382	1.42798	6.97578	7.45907	8.09466	4.88317	89	208	73	120	151	47	266	98	286	179	0	34	350	59	260	262	286	185
gene-GIB67_000608	JACGCM010000201.1	220054	220700	-	GIB67_000608	1896	rna-gnl|WGS:JACGCM|KingUnif13668.1	NA	NA	NA	NA	PREDICTED: dual specificity protein phosphatase 12-like [Solanum tuberosum]	NA	21.078	23.4958	21.2012	30.907	35.4046	28.044	33.196	28.4362	34.9362	13.847	37.1111	25.637	25.574	18.0641	26.9246	18.3994	16.3628	23.424	626	774	625	1113	1213	994	1074	700	1048	433	1359	853	858	652	889	572	513	785
gene-GIB67_000609	JACGCM010000201.1	215148	216131	-	GIB67_000609	1895	rna-gnl|WGS:JACGCM|KingUnif19855.1	GO:0033133(positive regulation of glucokinase activity)	NA	NA	NA	dual specificity protein phosphatase 12 [Ricinus communis]	NA	28.3499	25.3163	25.3067	37.7697	37.099	37.2326	41.16	33.9087	43.0442	26.1423	38.5217	36.9595	29.3555	24.9446	33.3811	28.6272	29.8104	26.7824	533	528	473	861	805	835	844	529	818	518	894	779	624	570	698	563	592	568
gene-GIB67_000610	JACGCM010000201.1	345426	345696	+	GIB67_000610	1907	rna-gnl|WGS:JACGCM|KingUnif25361.1	NA	NA	NA	NA		NA	0	0	0.117653	0	0.069124	0	0	0	0	0	0	0	0.284372	0.317948	0	0	0.6992	0.935774	0	0	2	0	1	0	0	0	0	0	0	0	4	5	0	0	9	13
gene-GIB67_000611	JACGCM010000201.1	290053	298507	-	GIB67_000611	1905	rna-gnl|WGS:JACGCM|KingUnif03734.1	NA	NA	NA	NA	uncharacterized protein LOC109950001 [Prunus persica]	NA	11.275	16.8992	13.5745	13.7501	14.8039	12.3846	18.4484	17.2722	16.6545	12.7051	12.1167	13.3311	11.8372	7.44093	12.9495	14.5356	17.7928	12.4359	507	843	606	750	768	665	904	645	757	602	672	672	602	407	648	684	845	631
gene-GIB67_000614	JACGCM010001072.1	33811	34578	+	GIB67_000614	15278	rna-gnl|WGS:JACGCM|KingUnif17753.1	GO:0005739(mitochondrion)	NA	NA	NA	Sec-independent protein translocase (mitochondrion) [Cynomorium coccineum]	NA	1.46797	0.216226	2.49448	1.2278	0.729725	0.927712	0.622831	2.80237	1.76814	0.954603	0.516077	0.701053	0.591737	0.374068	0.980405	0.663323	0.637242	0.162392	62	11	105	63	36	47	29	99	76	43	27	34	29	20	47	30	29	8
gene-GIB67_000615	JACGCM010001072.1	8944	10932	+	GIB67_000615	15277	rna-gnl|WGS:JACGCM|KingUnif40342.1	GO:0005739(mitochondrion)	NA	NA	NA	cytochrome c maturase subunit Fn (mitochondrion) [Geranium pratense]	NA	0.468341	0.15042	1.00793	0.210822	0.116032	0.171337	0.377446	0.937565	0.432075	0.485149	0.19615	0.245833	0.384719	0.123298	0.373673	0.447779	0.274232	0.203585	52	19	110	28	15	23	45	86	48	56	27	31	48	17	46	52	32	26
gene-GIB67_000616	JACGCM010001072.1	261202	262575	+	GIB67_000616	15279	rna-gnl|WGS:JACGCM|KingUnif01305.1	GO:0005739(mitochondrion)	00190(Oxidative phosphorylation)	K03936	EC:1.6.5.3;EC:1.6.99.3	NADH dehydrogenase subunit 9 (mitochondrion) [Geranium brycei]	NA	12.2133	3.32007	18.0189	4.37993	5.56186	12.6036	9.0489	18.6727	8.91064	8.14203	4.01939	4.29659	5.39596	3.23842	6.47968	9.9482	5.35083	3.1827	419	127	614	183	221	516	339	532	309	295	171	166	210	135	248	357	194	124
gene-GIB67_000617	JACGCM010002246.1	4593	5648	-	GIB67_000617	34421	rna-gnl|WGS:JACGCM|KingUnif25314.1	NA	NA	NA	NA		NA	0	0	0	0	0	0	0.184312	0	0	0	0	0	0	0	0	0	0	0	0	0	0	0	0	0	10	0	0	0	0	0	0	0	0	0	0	0
gene-GIB67_000618	JACGCM010000859.1	32519	33640	+	GIB67_000618	11991	rna-gnl|WGS:JACGCM|KingUnif02939.1	GO:0005515(protein binding);GO:0005634(nucleus);GO:0006351(transcription, DNA-templated);GO:0006355(regulation of transcription, DNA-templated);GO:0046982(protein heterodimerization activity)	03022(Basal transcription factors)	K14649	NA	PREDICTED: transcription initiation factor TFIID subunit 8-like [Nelumbo nucifera]	NA	31.3178	19.7164	22.3504	12.3304	13.4325	10.1459	14.9177	21.1396	23.1275	21.7079	13.0706	11.9063	23.9953	16.8879	13.1017	15.7132	13.23	24.3767	1931	1349	1369	922	956	747	1003	1082	1441	1410	995	823	1672	1266	899	1014	861	1696
gene-GIB67_000619	JACGCM010000859.1	43411	43921	+	GIB67_000619	11993	rna-gnl|WGS:JACGCM|KingUnif11663.1	NA	NA	NA	NA		NA	0.712783	0.413915	0	0.450779	0	0.269729	0.970288	0	0.419491	0.184733	0.252095	1.07404	0.263423	0.101858	0	0.31043	0.248639	0.38047	20	13	0	15	0	9	29	0	12	6	9	33	9	4	0	9	8	12
gene-GIB67_000620	JACGCM010000859.1	42160	44574	-	GIB67_000620	11992	rna-gnl|WGS:JACGCM|KingUnif37459.1	GO:0004721(phosphoprotein phosphatase activity)	NA	NA	NA	NLI interacting factor [Macleaya cordata]	NA	10.8261	11.4386	11.5818	16.8396	16.5178	14.0315	16.161	20.4157	19.0599	18.0013	14.4755	14.3424	10.6481	8.54652	12.0153	15.8249	16.7265	11.6437	768	900	816	1448	1352	1187	1249	1201	1366	1345	1266	1140	853	737	948	1174	1252	932
gene-GIB67_000621	JACGCM010000859.1	76116	79814	-	GIB67_000621	11997	rna-gnl|WGS:JACGCM|KingUnif34849.1	GO:0005515(protein binding);GO:0005662(DNA replication factor A complex)	03030(DNA replication);03420(Nucleotide excision repair);03430(Mismatch repair);03440(Homologous recombination)	K07466	NA	OB-fold nucleic acid binding domain [Macleaya cordata]	NA	0.169518	0.110227	0.089173	0.342245	0.095287	0.198593	0.092734	0.044179	0.152865	0.799437	0.051542	0.355545	7.23046	0.304573	21.7124	2.99253	2.34546	2.23034	19	14	10	45	12	26	11	4	17	92	7	44	886	41	2618	340	269	273
gene-GIB67_000622	JACGCM010000859.1	56122	59466	-	GIB67_000622	11995	rna-gnl|WGS:JACGCM|KingUnif10687.1	GO:0005524(ATP binding);GO:0005777(peroxisome);GO:0005886(plasma membrane);GO:0009409(response to cold);GO:0009414(response to water deprivation);GO:0009651(response to salt stress);GO:0009737(response to abscisic acid);GO:0009738(abscisic acid-activated signaling pathway);GO:0009942(longitudinal axis specification);GO:0009945(radial axis specification);GO:0016021(integral component of membrane);…	NA	NA	NA	hypothetical protein AQUCO_00200885v1 [Aquilegia coerulea]	NA	13.6517	11.2896	11.1248	17.3004	15.7198	22.2963	17.558	27.4301	28.2107	6.40437	15.1827	17.5871	11.0943	7.57502	9.59133	4.27824	4.47736	9.03652	2509	2302	2031	3857	3334	4891	3519	4183	5240	1241	3443	3622	2304	1693	1961	823	869	1875
gene-GIB67_000623	JACGCM010000859.1	46377	51804	-	GIB67_000623	11994	rna-gnl|WGS:JACGCM|KingUnif31082.1	NA	NA	NA	NA		NA	3.66881	3.5569	3.45513	7.04277	5.53841	8.23718	5.30564	8.54271	7.06581	2.35678	7.09339	3.38267	3.17412	2.01447	2.77555	1.92745	3.12676	3.0515	373	401	349	867	649	998	588	720	725	252	889	385	364	249	314	205	335	350
gene-GIB67_000625	JACGCM010000859.1	149057	155643	+	GIB67_000625	12001	rna-gnl|WGS:JACGCM|KingUnif39838.1	GO:0015095(magnesium ion transmembrane transporter activity);GO:0015693(magnesium ion transport)	NA	NA	NA	Mg2+ transporter protein [Macleaya cordata]	NA	3.77161	3.81817	1.73768	12.7422	16.0503	14.3036	4.63198	4.24465	3.73272	2.86403	9.88061	11.0884	10.9297	6.30283	17.0062	7.63902	7.53195	4.16777	358	402	164	1466	1757	1619	479	334	358	287	1157	1179	1172	727	1794	759	755	447
gene-GIB67_000626	JACGCM010000859.1	128602	132055	+	GIB67_000626	12000	rna-gnl|WGS:JACGCM|KingUnif33239.1	GO:0004185(serine-type carboxypeptidase activity);GO:0005773(vacuole);GO:0009742(brassinosteroid mediated signaling pathway);GO:0051603(proteolysis involved in cellular protein catabolic process)	NA	NA	NA	PREDICTED: serine carboxypeptidase-like 25 isoform X1 [Populus euphratica]	NA	1.79836	1.01197	0.709067	0.67319	0.370114	0.31433	0.810994	1.03115	0.702873	0.182637	0	0.337859	1.97532	0.060245	3.78041	0	0	0.036808	168	105	66	77	40	36	83	80	67	18	0	36	209	7	393	0	0	4
gene-GIB67_000627	JACGCM010000859.1	156276	159344	+	GIB67_000627	12002	rna-gnl|WGS:JACGCM|KingUnif17423.1	GO:0003723(RNA binding);GO:0004535(poly(A)-specific ribonuclease activity);GO:0004540(ribonuclease activity);GO:0005634(nucleus);GO:0005739(mitochondrion);GO:0006351(transcription, DNA-templated);GO:0006355(regulation of transcription, DNA-templated);GO:0009451(RNA modification);GO:0046872(metal ion binding)	03018(RNA degradation)	K12581	NA	putative CCR4-associated factor 1 homolog 8 [Prunus yedoensis var. nudiflora]	NA	0	0	0.023945	0.025805	0.093698	0.051429	0.114275	0	0.030971	0	0	0	0	0	0	0	0	0	0	0	2	3	8	5	9	0	3	0	0	0	0	0	0	0	0	0
gene-GIB67_000628	JACGCM010000859.1	168626	169891	-	GIB67_000628	12004	rna-gnl|WGS:JACGCM|KingUnif28901.1	GO:0004175(endopeptidase activity);GO:0005634(nucleus);GO:0005887(integral component of plasma membrane)	NA	NA	NA	presenilin-like protein At2g29900 [Hevea brasiliensis]	NA	21.8929	14.5075	16.4843	15.3399	16.3129	15.0642	11.7696	16.8851	12.5548	22.0983	18.9185	15.3234	17.3842	17.519	17.3102	16.5063	15.2746	15.8231	1523	1120	1139	1295	1310	1251	893	975	883	1620	1624	1195	1367	1482	1340	1202	1122	1243
gene-GIB67_000629	JACGCM010000859.1	85018	102530	-	GIB67_000629	11998	rna-gnl|WGS:JACGCM|KingUnif36679.1	GO:0005886(plasma membrane);GO:0006071(glycerol metabolic process);GO:0006629(lipid metabolic process);GO:0008081(phosphoric diester hydrolase activity);GO:0008889(glycerophosphodiester phosphodiesterase activity)	00564(Glycerophospholipid metabolism)	K01126	EC:3.1.4.46	PREDICTED: glycerophosphodiester phosphodiesterase GDPD6-like [Nelumbo nucifera]	NA	20.6103	15.0067	18.4505	120.611	21.1829	60.6717	34.2254	33.5102	27.4154	16.2861	34.3333	41.6272	9.32071	7.2908	13.0415	13.2973	31.3083	14.8414	1924	1554	1711	13657	2282	6760	3484	2596	2587	1602	3955	4355	984	828	1355	1300	3086	1564
gene-GIB67_000631	JACGCM010000859.1	161715	163100	-	GIB67_000631	12003	rna-gnl|WGS:JACGCM|KingUnif10026.1	NA	NA	NA	NA		NA	0.222594	0.293263	0.097829	0.039344	0	0	0.109526	0.384327	0.160721	0.043466	0.162874	0	0	0	0.104666	0.084449	0	0	14	21	7	3	0	0	8	20	11	3	13	0	0	0	8	6	0	0
gene-GIB67_000633	JACGCM010000859.1	178094	189940	-	GIB67_000633	12005	rna-gnl|WGS:JACGCM|KingUnif03940.1	GO:0005515(protein binding)	NA	NA	NA	hypothetical protein BVC80_8787g16 [Macleaya cordata]	NA	16.4797	18.2353	18.526	9.68451	10.7289	9.08623	17.4678	16.9969	21.6369	8.76751	5.48445	9.59654	12.2432	7.06655	7.29139	6.47425	6.7454	12.2577	1430	1755	1597	1020	1075	941	1653	1224	1898	802	588	933	1201	746	704	588	618	1201
gene-GIB67_000634	JACGCM010000859.1	205043	206148	-	GIB67_000634	12007	rna-gnl|WGS:JACGCM|KingUnif35878.1	GO:0004674(protein serine/threonine kinase activity);GO:0005886(plasma membrane);GO:0006468(protein phosphorylation)	NA	NA	NA	probable receptor-like protein kinase At5g20050 [Ricinus communis]	NA	1.46157	2.18812	2.38191	5.61557	5.75737	5.37347	3.57361	2.20393	3.19325	2.29683	0.23612	2.44734	1.62672	2.28126	2.57221	2.82297	3.73145	6.53706	78	129	126	361	352	340	207	97	171	129	16	146	98	147	152	157	209	391
gene-GIB67_000635	JACGCM010000859.1	355642	357723	+	GIB67_000635	12009	rna-gnl|WGS:JACGCM|KingUnif31400.1	NA	NA	NA	NA	hypothetical protein AQUCO_01200133v1 [Aquilegia coerulea]	NA	0	0	0	0	0.014343	0	0	0	0	0	0	0	0	0	0	0	0	0	0	0	0	0	2	0	0	0	0	0	0	0	0	0	0	0	0	0
gene-GIB67_000636	JACGCM010000859.1	385085	389120	+	GIB67_000636	12011	rna-gnl|WGS:JACGCM|KingUnif15264.1	GO:0002679(respiratory burst involved in defense response);GO:0004601(peroxidase activity);GO:0005509(calcium ion binding);GO:0005515(protein binding);GO:0005886(plasma membrane);GO:0005887(integral component of plasma membrane);GO:0006952(defense response);GO:0007231(osmosensory signaling pathway);GO:0009723(response to ethylene);GO:0009738(abscisic acid-activated signaling pathway);GO:0009873(e…	04016(MAPK signaling pathway - plant);04626(Plant-pathogen interaction)	K13447	EC:1.6.3.-;EC:1.11.1.-	PREDICTED: respiratory burst oxidase homolog protein A-like [Nelumbo nucifera]	NA	0.028373	0	0	0	0	0	0	0	0	0	0	0.036967	0.02547	0.024691	0	0.208993	1.95768	0.118762	4	0	0	0	0	0	0	0	0	0	0	6	4	4	0	29	269	18
gene-GIB67_000637	JACGCM010000859.1	372207	376451	-	GIB67_000637	12010	rna-gnl|WGS:JACGCM|KingUnif40505.1	GO:0000287(magnesium ion binding);GO:0004647(phosphoserine phosphatase activity);GO:0006564(L-serine biosynthetic process);GO:0009507(chloroplast)	00260(Glycine, serine and threonine metabolism)	K01079	EC:3.1.3.3	hypothetical protein BVC80_8787g15 [Macleaya cordata]	NA	13.3825	13.016	13.1481	8.33649	11.4619	8.59411	15.8747	17.3957	15.2813	22.8187	13.7975	13.0587	41.0837	19.8718	52.8599	60.2891	29.1118	36.4739	911	983	889	689	901	699	1179	983	1052	1637	1159	997	3161	1645	4003	4296	2093	2803
gene-GIB67_000640	JACGCM010000859.1	389720	395547	-	GIB67_000640	12012	rna-gnl|WGS:JACGCM|KingUnif11834.1	GO:0005618(cell wall);GO:0005634(nucleus);GO:0005730(nucleolus);GO:0005737(cytoplasm);GO:0005739(mitochondrion);GO:0005753(mitochondrial proton-transporting ATP synthase complex);GO:0005794(Golgi apparatus);GO:0008270(zinc ion binding);GO:0009507(chloroplast);GO:0015986(ATP synthesis coupled proton transport);GO:0016020(membrane);GO:0045261(proton-transporting ATP synthase complex, catalytic core…	00190(Oxidative phosphorylation)	K02136	NA	PREDICTED: ATP synthase subunit gamma, mitochondrial [Nelumbo nucifera]	NA	100.93	85.1604	111.183	96.1288	102.554	99.8122	135.931	161.406	120.242	91.9812	119.46	113.107	119.46	96.4238	152.707	139.453	151.768	115.632	8073	7557	8834	9328	9468	9530	11856	10713	9722	7753	11791	10139	10799	9377	13588	11676	12818	10440
gene-GIB67_000643	JACGCM010000859.1	634756	636389	+	GIB67_000643	12020	rna-gnl|WGS:JACGCM|KingUnif02993.1	NA	NA	NA	NA		NA	1.39267	1.00176	1.56082	0	0	0.089233	0.280233	0.309636	1.14364	0.681517	0.160715	0.048969	0	0.053758	0	0	0	0.556688	75	60	83	0	0	6	17	14	62	39	11	3	0	4	0	0	0	34
gene-GIB67_000644	JACGCM010000859.1	625976	631567	+	GIB67_000644	12019	rna-gnl|WGS:JACGCM|KingUnif07440.1	GO:0003674(molecular_function);GO:0008150(biological_process);GO:0016021(integral component of membrane)	NA	NA	NA	hypothetical protein AQUCO_00200847v1 [Aquilegia coerulea]	NA	9.99877	15.3582	11.635	15.4619	14.0078	13.0322	11.4383	10.8149	15.6785	10.9732	7.76337	16.4252	8.75704	7.27625	17.3933	10.1206	12.4744	7.92125	540	920	624	1012	873	840	673	485	855	624	517	993	534	478	1044	572	711	483
gene-GIB67_000645	JACGCM010000859.1	604479	606485	+	GIB67_000645	12017	rna-gnl|WGS:JACGCM|KingUnif12010.1	GO:0003674(molecular_function);GO:0008150(biological_process);GO:0016021(integral component of membrane)	NA	NA	NA	hypothetical protein LR48_Vigan06g118200 [Vigna angularis]	NA	3.0191	3.39193	3.35829	3.22388	3.84614	4.43135	19.2608	20.7335	18.2587	2.16523	3.80099	5.64601	2.11645	2.67564	3.8766	22.185	19.9903	12.8864	106	133	118	138	156	186	738	604	648	81	165	223	84	115	152	816	741	511
gene-GIB67_000646	JACGCM010000859.1	609749	616353	+	GIB67_000646	12018	rna-gnl|WGS:JACGCM|KingUnif34059.1	GO:0003674(molecular_function);GO:0008150(biological_process);GO:0016021(integral component of membrane)	NA	NA	NA	putative Root UVB sensitive family [Rosa chinensis]	NA	2.16064	2.32168	2.89246	3.03018	4.29186	3.59138	8.5172	9.06507	9.3993	1.79952	0	4.6372	2.22404	1.89019	3.2209	10.4113	10.9306	5.97141	113	135	151	193	259	224	486	393	497	100	0	272	132	121	188	570	603	353
gene-GIB67_000647	JACGCM010000859.1	597993	602060	+	GIB67_000647	12016	rna-gnl|WGS:JACGCM|KingUnif16335.1	NA	NA	NA	NA	protein root UVB sensitive 3-like [Papaver somniferum]	NA	1.30233	1.4133	1.49634	2.15236	1.38578	2.08677	10.064	9.95708	8.08745	0.742212	2.87481	3.2565	1.87137	2.04674	1.81304	11.4796	10.0258	5.00004	44	53	50	88	54	84	366	276	273	27	119	122	71	83	68	401	353	189
gene-GIB67_000648	JACGCM010000859.1	643466	650905	-	GIB67_000648	12021	rna-gnl|WGS:JACGCM|KingUnif27955.1	GO:0003676(nucleic acid binding);GO:0005515(protein binding);GO:0005634(nucleus);GO:0006457(protein folding);GO:0008270(zinc ion binding)	NA	NA	NA	PREDICTED: DNAJ protein JJJ1 homolog [Nelumbo nucifera]	NA	52.3094	30.8078	40.3482	34.6985	31.4921	35.7838	58.2049	92.4208	62.3632	57.5461	33.4101	31.358	25.1736	20.1655	19.2708	26.8736	29.4585	25.0207	6682	4366	5119	5377	4643	5456	8107	9795	8051	7746	5266	4489	3634	3132	2739	3593	3973	3608
gene-GIB67_000649	JACGCM010000859.1	687637	697724	-	GIB67_000649	12022	rna-gnl|WGS:JACGCM|KingUnif24231.1	GO:0004402(histone acetyltransferase activity);GO:0004407(histone deacetylase activity);GO:0005634(nucleus);GO:0005737(cytoplasm);GO:0006338(chromatin remodeling);GO:0006351(transcription, DNA-templated);GO:0006355(regulation of transcription, DNA-templated);GO:0010053(root epidermal cell differentiation);GO:0016575(histone deacetylation);GO:0032041(NAD-dependent histone deacetylase activity (H3-…	NA	NA	NA	Histone deacetylase superfamily [Macleaya cordata]	NA	2.3428	1.94373	1.96844	2.09636	2.6615	3.30888	2.61762	2.31491	3.02911	1.16264	2.51061	2.50404	3.68802	0.859605	3.3326	2.25606	2.00928	2.69124	214	197	178	232	280	360	260	175	279	112	282	256	379	96	338	215	193	277
gene-GIB67_000650	JACGCM010000859.1	819982	828034	+	GIB67_000650	12027	rna-gnl|WGS:JACGCM|KingUnif20779.1	GO:0005789(endoplasmic reticulum membrane);GO:0015485(cholesterol binding);GO:0032933(SREBP signaling pathway)	NA	NA	NA	Band 7 protein [Macleaya cordata]	NA	21.9262	13.726	16.5988	15.6403	21.0805	14.6971	23.172	16.9696	18.902	25.9423	29.3918	21.3307	67.8482	21.9324	85.9489	27.5546	36.8079	31.6398	1881	1306	1414	1628	2087	1505	2167	1208	1639	2345	3111	2050	6576	2287	8199	2474	3333	3063
gene-GIB67_000651	JACGCM010000859.1	800065	802059	-	GIB67_000651	12025	rna-gnl|WGS:JACGCM|KingUnif32623.1	GO:0003674(molecular_function);GO:0003723(RNA binding);GO:0005739(mitochondrion);GO:0008150(biological_process);GO:0009451(RNA modification)	NA	NA	NA	hypothetical protein AQUCO_00200842v1 [Aquilegia coerulea]	NA	1.676	1.60523	1.34194	1.09885	1.18891	0.825057	2.19595	3.28349	2.99373	1.24331	1.82392	0.529337	3.727	0.354652	1.35066	0.864044	1.26367	1.94647	184	196	147	147	151	108	263	299	332	144	247	66	462	48	165	100	147	241
gene-GIB67_000652	JACGCM010000859.1	835829	837861	-	GIB67_000652	12028	rna-gnl|WGS:JACGCM|KingUnif42172.1	NA	00500(Starch and sucrose metabolism)	K19891	EC:3.2.1.39	PREDICTED: PLASMODESMATA CALLOSE-BINDING PROTEIN 3 [Nelumbo nucifera]	NA	43.4221	33.6552	27.5764	13.5373	9.84494	5.6493	12.7322	21.0449	15.6638	75.9556	56.3409	32.319	47.8685	15.6713	29.1544	16.0912	25.8796	67.139	3039	2613	1917	1150	796	472	972	1223	1109	5602	4866	2535	3787	1334	2270	1179	1913	5304
gene-GIB67_000653	JACGCM010000859.1	771388	790559	-	GIB67_000653	12023	rna-gnl|WGS:JACGCM|KingUnif04567.1	NA	NA	NA	NA	PREDICTED: uncharacterized protein LOC104599106 isoform X2 [Nelumbo nucifera]	NA	1.50834	2.18992	1.5592	2.6103	2.90185	2.50736	1.74831	2.13984	2.90491	2.31225	2.46566	1.9494	3.84247	1.46226	2.04695	2.3923	2.66373	2.10239	171	275	175	358	379	339	216	201	332	276	344	247	491	201	258	283	318	269
gene-GIB67_000655	JACGCM010000859.1	795773	797348	-	GIB67_000655	12024	rna-gnl|WGS:JACGCM|KingUnif40491.1	GO:0005274(allantoin:proton symporter activity);GO:0005524(ATP binding);GO:0005886(plasma membrane);GO:0015210(uracil transmembrane transporter activity);GO:0015505(uracil:cation symporter activity);GO:0015720(allantoin transport);GO:0015857(uracil transport);GO:0016021(integral component of membrane);GO:0022857(transmembrane transporter activity);GO:0043100(pyrimidine nucleobase salvage);GO:0071…	NA	NA	NA	PREDICTED: ureide permease 2-like [Nelumbo nucifera]	NA	1.95255	3.38669	1.5486	1.53092	0.73424	1.48443	1.68705	1.50081	2.2039	3.34313	1.6048	0.602677	2.80095	0.32238	1.42576	2.66676	2.80241	2.79123	70	134	55	67	31	64	66	45	80	126	71	25	113	14	57	100	106	113
gene-GIB67_000656	JACGCM010000859.1	972386	974659	+	GIB67_000656	12032	rna-gnl|WGS:JACGCM|KingUnif15884.1	NA	NA	NA	NA	Helicase [Macleaya cordata]	NA	1.23432	1.91872	0.933617	1.67654	1.4345	2.40553	1.02693	3.24505	3.40369	1.12745	2.40406	1.12643	1.22224	0.559536	1.26082	0.858273	1.70698	1.73991	91	156	68	149	122	211	82	198	252	88	218	93	102	50	103	66	132	144
gene-GIB67_000657	JACGCM010000859.1	892062	915201	+	GIB67_000657	12029	rna-gnl|WGS:JACGCM|KingUnif05620.1	GO:0004825(methionine-tRNA ligase activity);GO:0005829(cytosol);GO:0006431(methionyl-tRNA aminoacylation)	00450(Selenocompound metabolism);00970(Aminoacyl-tRNA biosynthesis)	K01874	EC:6.1.1.10	PREDICTED: methionine--tRNA ligase, chloroplastic/mitochondrial [Nelumbo nucifera]	NA	4.89925	4.64978	5.93832	9.16493	12.166	11.4217	6.86089	4.88376	6.10996	3.17979	6.22435	7.00131	4.69427	2.12859	5.14967	3.34166	3.60235	2.92151	737	776	887	1672	2112	2050	1125	610	929	504	1155	1180	798	390	862	526	572	496
gene-GIB67_000660	JACGCM010000859.1	985262	1010443	+	GIB67_000660	12033	rna-gnl|WGS:JACGCM|KingUnif39221.1	GO:0005524(ATP binding);GO:0005634(nucleus);GO:0005794(Golgi apparatus);GO:0006307(DNA dealkylation involved in DNA repair);GO:0006351(transcription, DNA-templated);GO:0006355(regulation of transcription, DNA-templated);GO:0008283(cell proliferation);GO:0016020(membrane);GO:0032508(DNA duplex unwinding);GO:0043140(ATP-dependent 3'-5' DNA helicase activity)	NA	NA	NA	Helicase [Macleaya cordata]	NA	2.30354	2.3078	2.40797	2.31892	1.80822	2.56799	2.80144	4.29193	6.20039	2.18422	3.38917	2.78047	2.44407	1.21058	2.8512	1.96823	2.37751	2.83974	475	527	493	580	430	631	629	734	1291	474	861	642	569	303	653	425	517	660
gene-GIB67_000661	JACGCM010000859.1	1016081	1036909	+	GIB67_000661	12034	rna-gnl|WGS:JACGCM|KingUnif39116.1	GO:0000166(nucleotide binding);GO:0003676(nucleic acid binding);GO:0004386(helicase activity);GO:0005524(ATP binding);GO:0005622(intracellular);GO:0005634(nucleus);GO:0005829(cytosol);GO:0006281(DNA repair);GO:0006307(DNA dealkylation involved in DNA repair);GO:0006351(transcription, DNA-templated);GO:0006355(regulation of transcription, DNA-templated);GO:0006974(cellular response to DNA damage s…	NA	NA	NA	Helicase [Macleaya cordata]	NA	4.56669	4.04983	4.54468	4.95768	4.41383	4.24697	7.34081	7.57612	10.5417	4.44736	7.3141	5.02873	4.86301	3.99842	6.29191	5.2707	5.53232	5.96524	803	790	794	1057	895	891	1407	1105	1872	824	1586	991	966	854	1230	970	1027	1183
gene-GIB67_000662	JACGCM010000859.1	1092582	1094400	+	GIB67_000662	12035	rna-gnl|WGS:JACGCM|KingUnif28265.1	GO:0005215(transporter activity);GO:0005634(nucleus);GO:0006810(transport)	NA	NA	NA	hypothetical protein CRG98_016918 [Punica granatum]	NA	0	0	0	0	0	0	0	0.112968	0.236048	0	0	0	0	0	0	0	0	0	0	0	0	0	0	0	0	6	14	0	0	0	0	0	0	0	0	0
gene-GIB67_000664	JACGCM010000859.1	1133354	1133734	+	GIB67_000664	12036	rna-gnl|WGS:JACGCM|KingUnif08565.1	NA	NA	NA	NA	Self-incompatibility protein S1 [Vitis vinifera]	NA	0	0	0	0	0	0	0	0	0	0	0	0	0	0.041396	0	0	0	0	0	0	0	0	0	0	0	0	0	0	0	0	0	2	0	0	0	0
gene-GIB67_000665	JACGCM010000859.1	1237676	1238179	-	GIB67_000665	12038	rna-gnl|WGS:JACGCM|KingUnif25852.1	GO:0005198(structural molecule activity);GO:0005200(structural constituent of cytoskeleton);GO:0005515(protein binding);GO:0005737(cytoplasm);GO:0005885(Arp2/3 protein complex);GO:0007015(actin filament organization);GO:0010090(trichome morphogenesis);GO:0030041(actin filament polymerization);GO:0034314(Arp2/3 complex-mediated actin nucleation);GO:0042995(cell projection);GO:0051015(actin filamen…	04144(Endocytosis)	K05758	NA	hypothetical protein AQUCO_00400808v1 [Aquilegia coerulea]	NA	0.195037	0	0.42908	0	0	0	0	0	0	0	0	0.188215	0	0	0	0.274203	0.135918	0	6	0	12	0	0	0	0	0	0	0	0	6	0	0	0	8	4	0
gene-GIB67_000666	JACGCM010000859.1	1307842	1311367	+	GIB67_000666	12040	rna-gnl|WGS:JACGCM|KingUnif21449.1	GO:0000139(Golgi membrane);GO:0005385(zinc ion transmembrane transporter activity);GO:0005802(trans-Golgi network);GO:0071577(zinc II ion transmembrane transport)	NA	NA	NA	putative zinc transporter At3g08650 [Hevea brasiliensis]	NA	0	0	0	0	0	0.038256	0	0	0.118181	0	0	0	0	0	0	0	0	0	0	0	0	0	0	1	0	0	3	0	0	0	0	0	0	0	0	0
gene-GIB67_000668	JACGCM010000859.1	1299913	1324718	-	GIB67_000668	12039	rna-gnl|WGS:JACGCM|KingUnif17390.1	GO:0001510(RNA methylation);GO:0008173(RNA methyltransferase activity);GO:0008757(S-adenosylmethionine-dependent methyltransferase activity)	NA	NA	NA	putative methyltransferase NSUN6 isoform X6 [Herrania umbratica]	NA	3.05942	3.18038	2.38776	3.12361	3.50569	2.21469	4.40697	3.75362	5.40967	2.52673	2.63797	2.12194	8.08825	1.53234	8.99248	4.01659	4.29894	3.20338	397	458	308	492	525	343	624	404	709	346	423	309	1186	242	1297	546	589	469
gene-GIB67_000670	JACGCM010000859.1	1386906	1396921	+	GIB67_000670	12043	rna-gnl|WGS:JACGCM|KingUnif42326.1	GO:0005576(extracellular region);GO:0005783(endoplasmic reticulum);GO:0009507(chloroplast);GO:0016021(integral component of membrane)	00650(Butanoate metabolism);00660(C5-Branched dibasic acid metabolism);00290(Valine, leucine and isoleucine biosynthesis);00770(Pantothenate and CoA biosynthesis)	K01652	EC:2.2.1.6	C2 calcium-dependent membrane targeting [Macleaya cordata]	NA	16.2898	13.6869	15.9129	15.9567	17.7131	15.4438	14.6502	14.8289	15.0941	13.7588	9.05189	13.3719	5.45984	7.61259	9.62633	14.4203	15.1298	17.1766	1521	1418	1476	1807	1909	1721	1492	1149	1424	1354	1043	1399	576	864	1000	1409	1491	1810
gene-GIB67_000672	JACGCM010000859.1	1414871	1422000	-	GIB67_000672	12045	rna-gnl|WGS:JACGCM|KingUnif29728.1	GO:0000148(1,3-beta-D-glucan synthase complex);GO:0003843(1,3-beta-D-glucan synthase activity);GO:0005886(plasma membrane)	NA	NA	NA	Glycosyl transferase [Macleaya cordata]	NA	0.510995	0.503181	0.186007	0.765707	0.59668	0.817291	0.503732	0.685663	0.822874	0.245758	0.767346	0.739706	0.796716	0.183355	2.02866	1.61199	2.52439	2.67961	52	57	19	95	71	100	56	58	85	27	97	85	92	23	230	172	272	308
gene-GIB67_000673	JACGCM010000859.1	1433039	1437938	-	GIB67_000673	12046	rna-gnl|WGS:JACGCM|KingUnif41979.1	GO:0000148(1,3-beta-D-glucan synthase complex);GO:0003843(1,3-beta-D-glucan synthase activity);GO:0005886(plasma membrane)	NA	NA	NA	hypothetical protein AQUCO_03900091v1 [Aquilegia coerulea]	NA	0.28536	0.267975	0.150908	0.839328	0.367604	0.350975	0	0.366571	0.448304	0.338351	0.124017	0.356484	0.177865	0	0.665966	0.55857	0.825646	1.79885	13	13	7	44	19	18	0	13	20	16	7	17	9	0	32	25	38	87
gene-GIB67_000674	JACGCM010000859.1	1448500	1452388	-	GIB67_000674	12047	rna-gnl|WGS:JACGCM|KingUnif39319.1	GO:0000148(1,3-beta-D-glucan synthase complex);GO:0003843(1,3-beta-D-glucan synthase activity);GO:0005886(plasma membrane)	NA	NA	NA	hypothetical protein AQUCO_03900091v1 [Aquilegia coerulea]	NA	0	0.245964	0	0.140392	0.241099	0.126059	0	0.184133	0.156008	0	0.313423	0.54535	0.124485	0	0.80209	0.735013	0.705728	0.508126	0	15	0	9	15	8	0	8	9	0	21	32	8	0	47	40	39	30
gene-GIB67_000678	JACGCM010000859.1	1589614	1590937	-	GIB67_000678	12051	rna-gnl|WGS:JACGCM|KingUnif21630.1	NA	NA	NA	NA	CAAX amino terminal protease [Macleaya cordata]	NA	0	0	0	0	0	0	0	0.227957	0	0	0	0	0	0	0	0	0	0	0	0	0	0	0	0	0	9	0	0	0	0	0	0	0	0	0	0
gene-GIB67_000679	JACGCM010000859.1	1826875	1834617	+	GIB67_000679	12054	rna-gnl|WGS:JACGCM|KingUnif30383.1	GO:0003674(molecular_function);GO:0005634(nucleus);GO:0008150(biological_process);GO:0009506(plasmodesma)	NA	NA	NA	PREDICTED: uncharacterized protein LOC104598940 isoform X1 [Nelumbo nucifera]	NA	2.97154	2.34313	1.50189	3.23927	4.21871	3.0882	2.47173	3.12625	3.05461	2.56915	2.72939	2.50503	1.31433	0.402432	1.08316	1.77026	1.90018	1.16456	860	752	432	1137	1408	1066	780	751	893	783	974	812	430	142	349	536	581	381
gene-GIB67_000680	JACGCM010000859.1	1810102	1819707	+	GIB67_000680	12053	rna-gnl|WGS:JACGCM|KingUnif20962.1	GO:0004497(monooxygenase activity)	NA	NA	NA	PREDICTED: cytochrome P450 CYP72A219-like [Nelumbo nucifera]	NA	0.258472	0	0	0.229418	0.067903	0.123769	0.650464	0.090379	0.151873	0.139532	0.3032	0.583815	3.33025	4.78781	5.81152	10.4883	21.8258	4.87922	25	0	0	27	8	15	68	8	15	14	36	62	357	552	613	1041	2184	522
gene-GIB67_000681	JACGCM010000859.1	1807651	1809160	+	GIB67_000681	12052	rna-gnl|WGS:JACGCM|KingUnif10621.1	GO:0009507(chloroplast);GO:0016020(membrane)	NA	NA	NA	hypothetical protein AQUCO_02200178v1 [Aquilegia coerulea]	NA	0.230547	0	0	0.242696	0	0	0	0	0	2.43981	0.069263	0	1.64254	0.096569	3.28369	3.61907	5.30669	1.41601	11	0	0	13	0	0	0	0	0	113	4	0	82	6	161	167	246	71
gene-GIB67_000682	JACGCM010000859.1	1852728	1853841	+	GIB67_000682	12056	rna-gnl|WGS:JACGCM|KingUnif24476.1	GO:0034219(carbohydrate transmembrane transport)	NA	NA	NA	triose phosphate/phosphate translocator, chloroplastic [Prunus persica]	NA	6.37049	4.15543	2.9358	2.4743	1.28041	1.75735	2.97981	5.33691	7.33517	3.93712	0.619812	1.09742	8.83186	1.92365	8.77992	9.28617	10.0367	7.50693	146	106	67	69	34	49	75	102	170	96	18	29	229	54	224	223	243	195
gene-GIB67_000683	JACGCM010000859.1	1835639	1843635	+	GIB67_000683	12055	rna-gnl|WGS:JACGCM|KingUnif30868.1	GO:0034219(carbohydrate transmembrane transport)	NA	NA	NA	Drug/metabolite transporter [Macleaya cordata]	NA	3.67321	3.46541	1.37916	1.46872	0.78099	0.989559	1.91031	3.15128	3.39957	2.00371	0.574013	0.862764	3.76051	1.64259	5.74522	5.08509	3.26392	3.14064	161	168	60	78	40	52	91	115	151	93	31	43	186	88	280	233	151	155
gene-GIB67_000684	JACGCM010000859.1	1859143	1865820	-	GIB67_000684	12057	rna-gnl|WGS:JACGCM|KingUnif39106.1	GO:0009813(flavonoid biosynthetic process);GO:0043231(intracellular membrane-bounded organelle);GO:0052696(flavonoid glucuronidation);GO:0080043(quercetin 3-O-glucosyltransferase activity);GO:0080044(quercetin 7-O-glucosyltransferase activity)	NA	NA	NA	hypothetical protein DVH24_032017 [Malus domestica]	NA	8.60358	12.4197	5.5541	5.32471	3.62723	1.63963	15.2077	7.10978	24.8144	7.57318	1.35793	3.02039	6.1557	2.43602	3.77008	10.835	13.7857	7.68043	483	773	310	362	235	110	930	331	1406	448	94	190	390	166	235	636	816	486
gene-GIB67_000687	JACGCM010000859.1	1919615	1929168	-	GIB67_000687	12062	rna-gnl|WGS:JACGCM|KingUnif00073.1	GO:0003674(molecular_function);GO:0005739(mitochondrion);GO:0008150(biological_process)	NA	NA	NA	Pentatricopeptide repeat [Macleaya cordata]	NA	7.97152	10.8491	9.02783	13.427	17.1083	15.2867	11.1524	11.3553	9.79359	9.28497	16.0622	12.069	11.6719	5.75382	19.5271	7.91735	9.19231	8.32345	1160	1751	1304	2369	2872	2654	1769	1371	1440	1423	2883	1967	1919	1018	3159	1206	1412	1367
gene-GIB67_000688	JACGCM010000859.1	1873380	1890142	-	GIB67_000688	12058	rna-gnl|WGS:JACGCM|KingUnif12795.1	GO:0000785(chromatin);GO:0003700(DNA binding transcription factor activity);GO:0005634(nucleus)	NA	NA	NA	zinc finger protein [Macleaya cordata]	NA	0.143469	0.125875	0.069649	0.243993	0.228797	0.14071	0.561625	0.326074	0.303636	0.202019	0.182776	0.211605	2.76675	0.390118	3.46579	0.331569	1.38518	0.587499	17	17	8	34	31	20	71	32	36	25	26	28	360	55	443	40	169	77
gene-GIB67_000692	JACGCM010000859.1	1891474	1892214	-	GIB67_000692	12059	rna-gnl|WGS:JACGCM|KingUnif35566.1	NA	NA	NA	NA	Lysine-specific demethylase 3B [Zostera marina]	NA	0.108114	0	0.089488	0	0.093673	0	0.05523	0.229104	0	0	1.08258	0.075429	0.966307	0	1.17995	0	0.155998	0.180637	4	0	4	0	4	0	3	7	0	0	50	4	41	0	49	0	7	8
gene-GIB67_000693	JACGCM010000859.1	2075984	2077155	+	GIB67_000693	12072	rna-gnl|WGS:JACGCM|KingUnif35260.1	NA	NA	NA	NA		NA	0.063372	0.152335	0	0	0	0	0	0	0.295954	0.058838	0	0	0.079702	0	0	0	0	0	3	8	0	0	0	0	0	0	15	3	0	0	5	0	0	0	0	0
gene-GIB67_000694	JACGCM010000859.1	2024192	2048705	+	GIB67_000694	12067	rna-gnl|WGS:JACGCM|KingUnif39540.1	GO:0003674(molecular_function);GO:0008150(biological_process);GO:0009507(chloroplast)	NA	NA	NA	hypothetical protein BVC80_8939g16 [Macleaya cordata]	NA	1.11101	1.15017	0.69187	3.01645	2.92994	2.04702	1.36518	1.21472	1.38468	1.35109	4.82577	2.40516	1.72798	1.06929	3.65981	1.18629	1.44649	1.91249	121	139	75	396	366	265	162	110	152	155	645	292	212	141	441	135	166	234
gene-GIB67_000695	JACGCM010000859.1	2054641	2056370	-	GIB67_000695	12070	rna-gnl|WGS:JACGCM|KingUnif16849.1	GO:0009813(flavonoid biosynthetic process);GO:0043231(intracellular membrane-bounded organelle);GO:0052696(flavonoid glucuronidation);GO:0080043(quercetin 3-O-glucosyltransferase activity);GO:0080044(quercetin 7-O-glucosyltransferase activity)	00565(Ether lipid metabolism);00600(Sphingolipid metabolism)	K04628	EC:2.4.1.47	hypothetical protein AQUCO_00200811v1 [Aquilegia coerulea]	NA	0.577379	0.725765	0.760342	0.194345	0.041688	0.030605	0.093643	0.050575	0.194642	0.38405	0	0	0	0	0	0	7.43209	0.086675	44	61	57	18	4	3	8	4	15	31	0	0	0	0	0	0	588	8
gene-GIB67_000696	JACGCM010000859.1	2044709	2045509	-	GIB67_000696	12068	rna-gnl|WGS:JACGCM|KingUnif19444.1	GO:0009813(flavonoid biosynthetic process);GO:0043231(intracellular membrane-bounded organelle);GO:0052696(flavonoid glucuronidation);GO:0080043(quercetin 3-O-glucosyltransferase activity);GO:0080044(quercetin 7-O-glucosyltransferase activity)	00565(Ether lipid metabolism);00600(Sphingolipid metabolism)	K04628	EC:2.4.1.47	hypothetical protein AQUCO_00200813v1 [Aquilegia coerulea]	NA	0.089995	0	0	0.240289	0	0	0	0	0	0	0	0.098419	0.001341	0	0	0.046896	0.191418	0	4	0	0	13	0	0	0	0	0	0	0	5	1	0	0	3	9	0
gene-GIB67_000697	JACGCM010000859.1	2045762	2046223	-	GIB67_000697	12069	rna-gnl|WGS:JACGCM|KingUnif37798.1	GO:0009813(flavonoid biosynthetic process);GO:0043231(intracellular membrane-bounded organelle);GO:0052696(flavonoid glucuronidation);GO:0080043(quercetin 3-O-glucosyltransferase activity);GO:0080044(quercetin 7-O-glucosyltransferase activity)	NA	NA	NA	hypothetical protein AQUCO_00200811v1 [Aquilegia coerulea]	NA	0.400319	0.136389	0	0.004764	0	0	0	0	0	0	0.061308	0	0.005114	0	0.333414	0	1.06279	0	11	4	0	1	0	0	0	0	0	0	2	0	1	0	10	0	29	0
gene-GIB67_000700	JACGCM010000859.1	2067961	2069834	-	GIB67_000700	12071	rna-gnl|WGS:JACGCM|KingUnif18988.1	GO:0008150(biological_process);GO:0009507(chloroplast);GO:0016021(integral component of membrane)	NA	NA	NA	hypothetical protein AQUCO_00200816v1 [Aquilegia coerulea]	NA	68.0738	41.0862	80.5293	67.1869	70.0887	62.2783	68.2378	70.0964	72.6133	67.3831	67.9406	63.5043	42.6833	40.0543	58.5921	74.4649	69.9065	64.1841	988	662	1161	1183	1174	1079	1080	844	1065	1030	1216	1033	700	707	946	1131	1071	1051
gene-GIB67_000703	JACGCM010000859.1	2110445	2110887	+	GIB67_000703	12074	rna-gnl|WGS:JACGCM|KingUnif07443.1	GO:0005759(mitochondrial matrix);GO:0006790(sulfur compound metabolic process);GO:0008198(ferrous iron binding);GO:0016226(iron-sulfur cluster assembly);GO:0051537(2 iron, 2 sulfur cluster binding);GO:0051539(4 iron, 4 sulfur cluster binding);GO:0097428(protein maturation by iron-sulfur cluster transfer)	NA	NA	NA	Iron-sulfur assembly protein IscA-like 2, mitochondrial [Ananas comosus]	NA	26.1546	18.9751	30.1397	38.0774	44.3116	34.2242	33.9776	37.2918	26.9802	32.5887	34.2302	36.0342	28.0547	30.5633	19.3726	24.8825	40.1831	19.7989	302	243	346	533	590	472	428	357	315	397	488	466	366	429	249	301	490	258
gene-GIB67_000705	JACGCM010000859.1	2167661	2171146	-	GIB67_000705	12080	rna-gnl|WGS:JACGCM|KingUnif08165.1	GO:0000502(proteasome complex);GO:0004298(threonine-type endopeptidase activity);GO:0005634(nucleus);GO:0005737(cytoplasm);GO:0005829(cytosol);GO:0005839(proteasome core complex);GO:0005886(plasma membrane);GO:0006511(ubiquitin-dependent protein catabolic process);GO:0008233(peptidase activity);GO:0009506(plasmodesma)	03050(Proteasome)	K02725	EC:3.4.25.1	PREDICTED: proteasome subunit alpha type-1-B-like [Nelumbo nucifera]	NA	0.713688	1.19905	0.180871	15.1542	5.1375	5.00383	0.285234	0	0.220308	0.740542	3.69867	6.02194	12.5154	3.38797	8.30602	0	0.251026	0.142286	29	55	8	747	241	243	13	0	10	32	186	274	575	168	376	0	11	7
gene-GIB67_000709	JACGCM010000859.1	2254838	2258565	+	GIB67_000709	12084	rna-gnl|WGS:JACGCM|KingUnif41747.1	GO:0000050(urea cycle);GO:0000053(argininosuccinate metabolic process);GO:0004055(argininosuccinate synthase activity);GO:0005737(cytoplasm);GO:0006526(arginine biosynthetic process)	00250(Alanine, aspartate and glutamate metabolism);00220(Arginine biosynthesis)	K01940	EC:6.3.4.5	Argininosuccinate synthase [Macleaya cordata]	NA	63.2609	55.5635	67.6479	33.3667	29.2434	23.453	115.94	117.2	110.641	50.4774	69.6979	39.0096	84.926	62.557	92.6502	157.069	116.215	89.2858	5960	5808	6331	3814	3180	2638	11911	9163	10536	5012	8103	4119	9043	7166	9711	15490	11561	9495
gene-GIB67_000710	JACGCM010000859.1	2200380	2201780	+	GIB67_000710	12082	rna-gnl|WGS:JACGCM|KingUnif25845.1	GO:0004017(adenylate kinase activity);GO:0005524(ATP binding);GO:0005739(mitochondrion);GO:0046939(nucleotide phosphorylation)	00230(Purine metabolism);00730(Thiamine metabolism)	K00939	EC:2.7.4.3	Adenylate kinase [Macleaya cordata]	NA	2.24668	3.14382	2.29222	1.48981	1.55866	0.359174	12.5423	5.91163	12.7226	5.22382	2.86618	1.55917	7.21508	4.08381	8.15378	10.8024	17.7566	6.65625	119	184	120	96	95	23	721	259	678	290	187	93	430	262	478	596	988	396
gene-GIB67_000713	JACGCM010000859.1	2335968	2337716	+	GIB67_000713	12087	rna-gnl|WGS:JACGCM|KingUnif28229.1	GO:0009813(flavonoid biosynthetic process);GO:0043231(intracellular membrane-bounded organelle);GO:0052696(flavonoid glucuronidation);GO:0080043(quercetin 3-O-glucosyltransferase activity);GO:0080044(quercetin 7-O-glucosyltransferase activity)	00565(Ether lipid metabolism);00600(Sphingolipid metabolism)	K04628	EC:2.4.1.47	hypothetical protein AQUCO_00200808v1, partial [Aquilegia coerulea]	NA	0	0	0.118625	0.036255	0	0.086883	0	0	0	0.051184	0.460283	0	0.21477	0.038708	0.048485	0	0	0	0	0	9	4	0	8	0	0	0	4	42	0	18	4	4	0	0	0
gene-GIB67_000714	JACGCM010000859.1	2339557	2344876	+	GIB67_000714	12088	rna-gnl|WGS:JACGCM|KingUnif21216.1	GO:0009813(flavonoid biosynthetic process);GO:0043231(intracellular membrane-bounded organelle);GO:0052696(flavonoid glucuronidation);GO:0080043(quercetin 3-O-glucosyltransferase activity);GO:0080044(quercetin 7-O-glucosyltransferase activity)	NA	NA	NA	UDP-glycosyltransferase 83A1 [Ricinus communis]	NA	0	0.088167	0	0	0	0	0.023779	0	0	0	0	0	0	0	0	0	0	0	0	8	0	0	0	0	3	0	0	0	0	0	0	0	0	0	0	0
gene-GIB67_000715	JACGCM010000859.1	2354675	2358316	+	GIB67_000715	12089	rna-gnl|WGS:JACGCM|KingUnif03604.1	GO:0009813(flavonoid biosynthetic process);GO:0043231(intracellular membrane-bounded organelle);GO:0052696(flavonoid glucuronidation);GO:0080043(quercetin 3-O-glucosyltransferase activity);GO:0080044(quercetin 7-O-glucosyltransferase activity)	NA	NA	NA	UDP-glycosyltransferase 83A1 [Vitis vinifera]	NA	0	0	0	0.027742	0	0.07618	0.058048	0	0	0.062817	0	0	0.171974	0.079747	0	0.36602	0.225441	0.178895	0	0	0	3	0	6	4	0	0	4	0	0	12	6	0	23	15	13
gene-GIB67_000717	JACGCM010000859.1	2292471	2294273	-	GIB67_000717	12085	rna-gnl|WGS:JACGCM|KingUnif15560.1	GO:0009813(flavonoid biosynthetic process);GO:0043231(intracellular membrane-bounded organelle);GO:0052696(flavonoid glucuronidation);GO:0080043(quercetin 3-O-glucosyltransferase activity);GO:0080044(quercetin 7-O-glucosyltransferase activity)	00565(Ether lipid metabolism);00600(Sphingolipid metabolism)	K04628	EC:2.4.1.47	hypothetical protein AQUCO_00200807v1 [Aquilegia coerulea]	NA	0	0	0	0	0	0	0	0	0.080855	0.233599	0	0.134134	0.031221	0.036581	0.120672	0.144864	1.88671	0.069495	0	0	0	0	0	0	0	0	7	21	0	13	3	4	11	13	162	7
gene-GIB67_000718	JACGCM010000859.1	2359477	2361809	-	GIB67_000718	12090	rna-gnl|WGS:JACGCM|KingUnif23902.1	GO:0000184(nuclear-transcribed mRNA catabolic process, nonsense-mediated decay);GO:0003723(RNA binding);GO:0003743(translation initiation factor activity);GO:0005634(nucleus);GO:0005737(cytoplasm);GO:0006397(mRNA processing);GO:0006417(regulation of translation);GO:0060211(regulation of nuclear-transcribed mRNA poly(A) tail shortening)	03013(RNA transport);03015(mRNA surveillance pathway);03018(RNA degradation)	K13126	NA	PREDICTED: polyadenylate-binding protein 7-like, partial [Nicotiana tabacum]	NA	10.0459	3.74987	0.161784	0.429822	0	0	0	0	0.340367	14.2804	0	0	16.603	0	3.48927	0	0.84252	0.162423	361	150	6	19	0	0	0	0	13	541	0	0	675	0	140	0	32	7
gene-GIB67_000720	JACGCM010000859.1	2478484	2488544	+	GIB67_000720	12094	rna-gnl|WGS:JACGCM|KingUnif04395.1	GO:0008422(beta-glucosidase activity);GO:1901657(glycosyl compound metabolic process)	00500(Starch and sucrose metabolism);00460(Cyanoamino acid metabolism);00940(Phenylpropanoid biosynthesis)	K01188	EC:3.2.1.21	Glycoside hydrolase [Macleaya cordata]	NA	1.81781	1.32991	1.10746	6.3427	2.47015	1.95508	2.19391	2.83625	2.12724	1.49025	5.94424	19.122	3.31032	2.86914	5.73326	13.4281	17.9747	13.3017	134	109	81	566	210	172	176	173	159	116	540	1576	275	257	469	1034	1395	1104
gene-GIB67_000721	JACGCM010000859.1	2471579	2472948	+	GIB67_000721	12093	rna-gnl|WGS:JACGCM|KingUnif05745.1	GO:0008422(beta-glucosidase activity);GO:1901657(glycosyl compound metabolic process)	00500(Starch and sucrose metabolism);00460(Cyanoamino acid metabolism);00940(Phenylpropanoid biosynthesis)	K01188	EC:3.2.1.21	beta-glucosidase 40-like [Papaver somniferum]	NA	0	0.293803	0	3.2882	1.24439	0.560298	0.910124	0.476359	1.12518	0.378031	3.66671	9.10033	1.0159	1.21496	2.10495	7.24485	9.96486	8.5759	0	6	0	70	25	12	18	7	20	7	79	177	20	26	41	132	183	168
gene-GIB67_000722	JACGCM010000859.1	2578602	2585046	+	GIB67_000722	12100	rna-gnl|WGS:JACGCM|KingUnif15835.1	GO:0004601(peroxidase activity);GO:0005576(extracellular region);GO:0006979(response to oxidative stress);GO:0020037(heme binding);GO:0042744(hydrogen peroxide catabolic process);GO:0046872(metal ion binding);GO:0055114(oxidation-reduction process)	00940(Phenylpropanoid biosynthesis)	K00430	EC:1.11.1.7	PREDICTED: peroxidase 40 [Vitis vinifera]	NA	3.26941	3.37511	1.71026	3.74041	3.33189	2.14644	3.67482	2.6002	3.77703	2.50484	1.92157	2.01202	3.26503	1.92758	3.77301	3.34338	4.91667	1.68713	360	412	187	499	423	282	441	238	420	291	261	248	406	258	462	385	571	210
gene-GIB67_000723	JACGCM010000859.1	2522461	2528647	+	GIB67_000723	12096	rna-gnl|WGS:JACGCM|KingUnif33459.1	GO:0003677(DNA binding);GO:0005515(protein binding);GO:0005634(nucleus);GO:0006352(DNA-templated transcription, initiation);GO:0006355(regulation of transcription, DNA-templated);GO:0016021(integral component of membrane);GO:0017025(TBP-class protein binding)	03022(Basal transcription factors)	K03120	NA	TATA-box-binding protein [Vitis vinifera]	NA	0.741267	1.09831	1.06929	2.36571	2.37549	2.18388	1.43378	1.98976	1.34125	1.50033	1.3074	1.49012	4.06452	1.76019	4.01552	2.25464	2.33014	1.07529	61	99	87	234	223	212	128	135	111	129	132	136	374	174	363	192	200	99
gene-GIB67_000724	JACGCM010000859.1	2563702	2566657	-	GIB67_000724	12098	rna-gnl|WGS:JACGCM|KingUnif24123.1	GO:0005737(cytoplasm);GO:0009793(embryo development ending in seed dormancy)	NA	NA	NA	Ataxin-10 domain [Macleaya cordata]	NA	3.09773	3.11633	2.13241	5.96914	4.55196	4.05748	2.87744	4.38864	3.88361	3.10712	4.76344	2.49919	2.90165	2.1605	1.66942	1.38155	2.30424	2.86684	399	445	273	932	676	623	404	469	505	422	756	361	422	338	239	186	313	417
gene-GIB67_000725	JACGCM010000859.1	2576123	2577025	-	GIB67_000725	12099	rna-gnl|WGS:JACGCM|KingUnif12995.1	NA	NA	NA	NA	hypothetical protein BVC80_9065g61 [Macleaya cordata]	NA	0	0.055485	0.117173	0.066027	0.051467	0	0	0.189494	0.542751	0	0.064913	0.142465	0.257344	0.38027	0.14159	0.074981	0.283842	0.372669	0	4	6	4	3	0	0	8	28	0	4	8	15	23	8	4	15	21
gene-GIB67_000726	JACGCM010000859.1	2538881	2540448	-	GIB67_000726	12097	rna-gnl|WGS:JACGCM|KingUnif35224.1	GO:0005576(extracellular region);GO:0005829(cytosol);GO:0006949(syncytium formation);GO:0009505(plant-type cell wall);GO:0009506(plasmodesma);GO:0009664(plant-type cell wall organization);GO:0009826(unidimensional cell growth);GO:0009828(plant-type cell wall loosening);GO:0009831(plant-type cell wall modification involved in multidimensional cell growth);GO:0016020(membrane)	NA	NA	NA	expansin-A25-like protein [Cinnamomum micranthum f. kanehirae]	NA	0	0	0	0	0	0	0	0	0	0	0	0	0.125999	0	0	0	0	0	0	0	0	0	0	0	0	0	0	0	0	0	6	0	0	0	0	0
gene-GIB67_000727	JACGCM010000859.1	2508482	2510059	-	GIB67_000727	12095	rna-gnl|WGS:JACGCM|KingUnif42263.1	NA	NA	NA	NA		NA	3.60184	3.36408	2.65505	2.05389	3.63522	2.38387	3.63495	2.53817	4.70592	3.25132	1.74678	2.19742	11.7581	0.49123	5.24678	1.19328	1.70139	0.97212	171	177	125	118	199	135	188	100	226	163	103	117	630	29	277	60	86	52
gene-GIB67_000728	JACGCM010000859.1	2656342	2657532	+	GIB67_000728	12103	rna-gnl|WGS:JACGCM|KingUnif39913.1	GO:0000981(RNA polymerase II transcription factor activity, sequence-specific DNA binding);GO:0001135(transcription factor activity, RNA polymerase II transcription factor recruiting);GO:0003677(DNA binding);GO:0003700(DNA binding transcription factor activity);GO:0005634(nucleus);GO:0006355(regulation of transcription, DNA-templated);GO:0006357(regulation of transcription by RNA polymerase II);G…	NA	NA	NA	hypothetical protein AQUCO_00200029v1 [Aquilegia coerulea]	NA	0.631626	3.20634	0.179405	0	0.181893	0	0	0.373072	0.44783	0.260446	0	0	0.410895	0.057132	0.116926	0.074061	0.317339	0.052086	33	183	10	0	11	0	0	16	24	15	0	0	24	4	7	4	18	4
gene-GIB67_000729	JACGCM010000859.1	2613097	2614569	+	GIB67_000729	12101	rna-gnl|WGS:JACGCM|KingUnif28105.1	GO:0051213(dioxygenase activity)	00904(Diterpenoid biosynthesis)	K04124	EC:1.14.11.15	2-oxoglutarate-dependent dioxygenase [Actinidia chinensis var. chinensis]	NA	3.41359	7.6188	1.76443	2.94588	2.84785	1.62551	4.42414	2.87666	3.52998	0.618398	0.087137	1.0559	0.471865	0.361566	0.505837	2.19338	1.72331	0.431809	231	571	119	242	222	131	326	162	241	44	8	80	36	30	38	155	123	33
gene-GIB67_000730	JACGCM010000859.1	2641925	2655589	+	GIB67_000730	12102	rna-gnl|WGS:JACGCM|KingUnif00516.1	GO:0005730(nucleolus)	NA	NA	NA	Apoptosis-antagonizing transcription factor [Macleaya cordata]	NA	9.19954	28.3326	5.80545	6.31118	6.09831	2.93245	6.29042	3.0878	6.5469	6.24341	2.1344	2.49684	5.51846	0.824444	2.5655	3.22878	3.85612	2.71345	644	2198	404	536	493	245	480	180	463	461	185	196	437	71	200	237	285	215
gene-GIB67_000731	JACGCM010000859.1	2662360	2663964	+	GIB67_000731	12107	rna-gnl|WGS:JACGCM|KingUnif38869.1	GO:0008420(CTD phosphatase activity);GO:0016591(DNA-directed RNA polymerase II, holoenzyme);GO:0070940(dephosphorylation of RNA polymerase II C-terminal domain)	NA	NA	NA	BRCT domain [Macleaya cordata]	NA	0	0.712427	0	0.290157	0.280389	0	0.19933	0	0.06511	0	0	0.127683	0	0	0	0	0	0	0	18	0	8	8	0	5	0	2	0	0	4	0	0	0	0	0	0
gene-GIB67_000732	JACGCM010000859.1	2659256	2659767	+	GIB67_000732	12105	rna-gnl|WGS:JACGCM|KingUnif38525.1	GO:0005509(calcium ion binding);GO:0005739(mitochondrion);GO:0005773(vacuole);GO:0005774(vacuolar membrane);GO:0005783(endoplasmic reticulum);GO:0005789(endoplasmic reticulum membrane);GO:0005794(Golgi apparatus);GO:0005886(plasma membrane);GO:0006457(protein folding);GO:0009505(plant-type cell wall);GO:0009506(plasmodesma);GO:0009507(chloroplast);GO:0016020(membrane);GO:0016021(integral componen…	04141(Protein processing in endoplasmic reticulum);04145(Phagosome)	K08054	NA	RecName: Full=Calnexin homolog; Flags: Precursor	NA	0.366688	0.301713	0.509008	0.707352	1.1703	0.97355	1.13804	0.167394	2.65509	0.70056	0.092691	0.999882	0	0.803283	0.87589	1.70224	0.689541	0	10	9	14	23	36	31	33	4	71	20	4	30	0	26	26	47	20	0
gene-GIB67_000733	JACGCM010000859.1	2657974	2659614	-	GIB67_000733	12104	rna-gnl|WGS:JACGCM|KingUnif25683.1	GO:0005509(calcium ion binding);GO:0005739(mitochondrion);GO:0005773(vacuole);GO:0005774(vacuolar membrane);GO:0005783(endoplasmic reticulum);GO:0005789(endoplasmic reticulum membrane);GO:0005794(Golgi apparatus);GO:0005886(plasma membrane);GO:0006457(protein folding);GO:0009505(plant-type cell wall);GO:0009506(plasmodesma);GO:0009507(chloroplast);GO:0016020(membrane);GO:0016021(integral componen…	04141(Protein processing in endoplasmic reticulum);04145(Phagosome)	K08054	NA	PREDICTED: calnexin homolog [Elaeis guineensis]	NA	2.08711	2.83872	2.30554	4.14927	5.6671	2.40577	3.98355	1.88601	17.1027	1.80866	1.01344	4.43274	2.17106	1.57525	3.53681	3.13228	2.67086	1.18256	129	195	142	312	405	178	269	97	1069	118	78	308	152	119	244	203	175	83
gene-GIB67_000734	JACGCM010000859.1	2664624	2672729	-	GIB67_000734	12108	rna-gnl|WGS:JACGCM|KingUnif23907.1	GO:0005887(integral component of plasma membrane);GO:0015179(L-amino acid transmembrane transporter activity);GO:0015297(antiporter activity)	NA	NA	NA	Amino acid/polyamine transporter I [Macleaya cordata]	NA	1.34442	1.38765	1.77509	6.49619	7.8565	9.11232	3.47587	7.37089	10.3864	3.00086	2.05432	7.60469	2.61611	1.02347	1.71376	1.14565	1.21878	1.3721	148	169	193	863	993	1191	415	670	1149	347	278	933	324	137	209	132	141	170
gene-GIB67_000736	JACGCM010000859.1	2660746	2662108	-	GIB67_000736	12106	rna-gnl|WGS:JACGCM|KingUnif07090.1	GO:0003676(nucleic acid binding);GO:0004553(hydrolase activity, hydrolyzing O-glycosyl compounds);GO:0004857(enzyme inhibitor activity);GO:0005737(cytoplasm);GO:0005975(carbohydrate metabolic process);GO:0046872(metal ion binding);GO:0047274(galactinol-sucrose galactosyltransferase activity)	00052(Galactose metabolism)	K06617	EC:2.4.1.82	Cyclic nucleotide-binding domain [Macleaya cordata]	NA	0	0	0	1.04868	0.883407	0.30978	0	0.536252	2.18836	0	0.216872	0.807071	0.545187	0	0	0	0	0	0	0	0	33	27	10	0	12	57	0	7	24	16	0	0	0	0	0
gene-GIB67_000737	JACGCM010000859.1	2745846	2755196	+	GIB67_000737	12112	rna-gnl|WGS:JACGCM|KingUnif05484.1	GO:0000275(mitochondrial proton-transporting ATP synthase complex, catalytic core F(1));GO:0015986(ATP synthesis coupled proton transport);GO:0046933(proton-transporting ATP synthase activity, rotational mechanism)	00190(Oxidative phosphorylation)	K02134	NA	RecName: Full=ATP synthase subunit delta', mitochondrial; AltName: Full=F-ATPase delta' subunit; Flags: Precursor	NA	89.109	67.5195	77.2182	76.6513	88.0778	79.0608	90.3737	87.3987	74.6263	97.1587	97.7316	75.3709	126.452	76.1463	128.626	128.951	102.031	118.713	5620	4724	4837	5865	6411	5952	6215	4574	4757	6457	7606	5327	9013	5839	9024	8513	6794	8451
gene-GIB67_000739	JACGCM010000859.1	2689663	2718356	-	GIB67_000739	12110	rna-gnl|WGS:JACGCM|KingUnif25473.1	GO:0000775(chromosome, centromeric region);GO:0003682(chromatin binding);GO:0005515(protein binding);GO:0005634(nucleus);GO:0006302(double-strand break repair);GO:0007062(sister chromatid cohesion);GO:0007076(mitotic chromosome condensation);GO:0009793(embryo development ending in seed dormancy);GO:0010468(regulation of gene expression);GO:0034508(centromere complex assembly);GO:0046872(metal ion…	NA	NA	NA	zinc finger protein [Macleaya cordata]	NA	6.04002	6.11113	6.17077	6.69613	6.45681	5.89889	5.33399	8.00996	8.96564	6.74821	6.08843	6.36198	6.24707	3.35964	6.03583	6.7341	6.21219	6.86396	2026	2273	2055	2724	2499	2361	1951	2229	3039	2385	2519	2391	2367	1370	2252	2364	2200	2598
gene-GIB67_000740	JACGCM010000859.1	2756586	2767139	-	GIB67_000740	12113	rna-gnl|WGS:JACGCM|KingUnif14007.1	GO:0003989(acetyl-CoA carboxylase activity);GO:0006633(fatty acid biosynthetic process);GO:0009317(acetyl-CoA carboxylase complex);GO:0009374(biotin binding);GO:0009507(chloroplast);GO:0009536(plastid);GO:0009570(chloroplast stroma);GO:0009941(chloroplast envelope)	00620(Pyruvate metabolism);00640(Propanoate metabolism);00061(Fatty acid biosynthesis)	K02160	NA	hypothetical protein AQUCO_00200799v1 [Aquilegia coerulea]	NA	13.6115	8.45176	14.1613	9.10133	15.6625	12.7852	12.711	12.312	15.056	7.94618	6.68607	7.87602	17.5647	9.14641	23.0667	16.6484	14.5394	12.8892	1103	760	1139	895	1464	1236	1123	828	1233	679	669	715	1608	901	2078	1412	1244	1179
gene-GIB67_000741	JACGCM010000859.1	2774244	2779961	-	GIB67_000741	12114	rna-gnl|WGS:JACGCM|KingUnif40022.1	GO:0003697(single-stranded DNA binding);GO:0003896(DNA primase activity);GO:0003899(DNA-directed 5'-3' RNA polymerase activity);GO:0005658(alpha DNA polymerase:primase complex);GO:0006260(DNA replication);GO:0006269(DNA replication, synthesis of RNA primer);GO:0006351(transcription, DNA-templated);GO:0016740(transferase activity);GO:1990077(primosome complex)	00230(Purine metabolism);00240(Pyrimidine metabolism);03030(DNA replication)	K02684	EC:2.7.7.-	PREDICTED: DNA primase small subunit isoform X1 [Nelumbo nucifera]	NA	5.95259	5.35515	5.00494	6.26114	5.60304	2.90988	11.5338	6.26869	15.4016	6.65304	3.08954	4.43347	5.72315	2.64525	8.82259	16.0066	16.8547	9.38454	441	440	369	563	479	258	932	386	1153	520	283	368	479	239	727	1241	1318	785
gene-GIB67_000742	JACGCM010000859.1	2823818	2836556	+	GIB67_000742	12116	rna-gnl|WGS:JACGCM|KingUnif18589.1	GO:0003951(NAD+ kinase activity);GO:0004143(diacylglycerol kinase activity);GO:0005509(calcium ion binding);GO:0005524(ATP binding);GO:0005737(cytoplasm);GO:0006952(defense response);GO:0007205(protein kinase C-activating G-protein coupled receptor signaling pathway);GO:0016021(integral component of membrane);GO:0016310(phosphorylation);GO:0035556(intracellular signal transduction)	00561(Glycerolipid metabolism);00564(Glycerophospholipid metabolism);04070(Phosphatidylinositol signaling system)	K00901	EC:2.7.1.107	hypothetical protein AQUCO_00200794v1 [Aquilegia coerulea]	NA	10.3117	7.62674	12.0704	18.2916	18.0158	21.3174	14.2038	19.6223	18.4188	14.6126	16.3874	13.961	11.605	12.5749	18.7037	20.2714	18.0734	23.3028	1763	1447	2050	3794	3555	4351	2648	2784	3183	2633	3457	2675	2243	2614	3558	3628	3263	4497
gene-GIB67_000743	JACGCM010000859.1	2876249	2877691	+	GIB67_000743	12117	rna-gnl|WGS:JACGCM|KingUnif39909.1	GO:0003979(UDP-glucose 6-dehydrogenase activity);GO:0005634(nucleus);GO:0005829(cytosol);GO:0005975(carbohydrate metabolic process);GO:0006024(glycosaminoglycan biosynthetic process);GO:0006065(UDP-glucuronate biosynthetic process)	00040(Pentose and glucuronate interconversions);00053(Ascorbate and aldarate metabolism);00520(Amino sugar and nucleotide sugar metabolism)	K00012	EC:1.1.1.22	PREDICTED: UDP-glucose 6-dehydrogenase 1 [Nelumbo nucifera]	NA	86.7227	60.2024	95.4021	75.5608	95.0483	107.966	78.5971	60.8558	60.4222	271.933	28.8608	103.306	99.1423	186.195	171.174	77.912	64.2196	41.2929	6875	5295	7512	7267	8697	10217	6794	4003	4842	22716	2824	9178	8882	17945	15095	6465	5376	3695
gene-GIB67_000744	JACGCM010000859.1	2796190	2800981	-	GIB67_000744	12115	rna-gnl|WGS:JACGCM|KingUnif33036.1	GO:0005634(nucleus);GO:0005819(spindle);GO:0005874(microtubule);GO:0032147(activation of protein kinase activity);GO:0060236(regulation of mitotic spindle organization)	NA	NA	NA	protein WVD2-like 4 [Quercus suber]	NA	0	0.167531	0.456047	0.456158	0.506037	0.441118	1.04914	0.586938	0.65094	0.082924	0.676012	0.332963	1.81858	0.632617	6.31663	0.878091	0.96255	0.205494	0	16	38	46	49	44	95	41	55	8	70	31	171	64	584	77	85	20
gene-GIB67_000745	JACGCM010000859.1	2893825	2922767	-	GIB67_000745	12120	rna-gnl|WGS:JACGCM|KingUnif22543.1	GO:0000398(mRNA splicing, via spliceosome);GO:0004004(ATP-dependent RNA helicase activity);GO:0005681(spliceosomal complex);GO:0005737(cytoplasm)	03040(Spliceosome)	K12813	EC:3.6.4.13	PREDICTED: putative pre-mRNA-splicing factor ATP-dependent RNA helicase DHX16 isoform X1 [Populus euphratica]	NA	4.68587	3.8987	3.63709	4.46488	5.1585	5.63625	5.60121	7.16678	8.58616	5.4668	4.55335	5.34507	6.41778	2.75866	5.60724	3.89072	4.67959	6.89579	675	623	520	780	857	968	879	856	1249	829	809	862	1044	483	898	586	711	1120
gene-GIB67_000746	JACGCM010000859.1	2879854	2882440	-	GIB67_000746	12118	rna-gnl|WGS:JACGCM|KingUnif05538.1	GO:0000398(mRNA splicing, via spliceosome);GO:0004004(ATP-dependent RNA helicase activity);GO:0005681(spliceosomal complex);GO:0005737(cytoplasm)	03040(Spliceosome)	K12813	EC:3.6.4.13	pre-mRNA-splicing factor ATP-dependent RNA helicase DEAH1 [Asparagus officinalis]	NA	12.2059	10.6304	10.3592	11.4008	11.7402	9.28538	9.34628	13.0241	15.351	16.1708	7.38182	10.4726	9.9596	6.33689	13.5867	12.438	11.6317	9.62134	328	317	277	372	364	298	274	291	417	458	245	316	303	207	407	350	330	292
gene-GIB67_000747	JACGCM010000859.1	2887036	2893613	-	GIB67_000747	12119	rna-gnl|WGS:JACGCM|KingUnif21554.1	NA	NA	NA	NA		NA	1.60482	1.16009	1.22782	0.894275	1.24098	1.18378	1.20478	1.50893	1.53797	1.60336	0.696596	1.16921	1.22915	0.583785	1.07437	0.767196	1.27444	1.05542	50	41	38	34	45	45	41	39	49	53	27	41	44	23	38	26	42	38
gene-GIB67_000748	JACGCM010000859.1	3016440	3018228	+	GIB67_000748	12124	rna-gnl|WGS:JACGCM|KingUnif31887.1	NA	NA	NA	NA		NA	15.5811	23.185	16.7489	10.5006	15.8793	12.4014	21.3266	20.508	19.589	15.4773	6.29027	4.89027	15.738	9.13495	7.18951	13.8778	13.3116	12.5272	434	717	464	355	511	413	648	474	552	455	217	153	496	310	223	405	392	394
gene-GIB67_000749	JACGCM010000859.1	3045149	3049870	+	GIB67_000749	12125	rna-gnl|WGS:JACGCM|KingUnif40622.1	NA	NA	NA	NA	PREDICTED: zinc finger RNA-binding protein-like [Gossypium arboreum]	NA	3.41158	4.57612	2.85973	2.33686	3.12979	2.29534	2.54414	2.64009	4.36016	5.10771	2.81562	3.16007	9.10037	2.64861	7.31418	6.17265	4.93183	3.14397	268	399	223	223	284	215	218	172	346	423	273	278	807	253	639	507	409	279
gene-GIB67_000750	JACGCM010000859.1	3056147	3057911	-	GIB67_000750	12126	rna-gnl|WGS:JACGCM|KingUnif25628.1	GO:0003700(DNA binding transcription factor activity);GO:0005634(nucleus);GO:0006351(transcription, DNA-templated);GO:0006355(regulation of transcription, DNA-templated);GO:0006970(response to osmotic stress);GO:0009414(response to water deprivation);GO:0009651(response to salt stress);GO:0043565(sequence-specific DNA binding);GO:0044212(transcription regulatory region DNA binding)	04016(MAPK signaling pathway - plant);04626(Plant-pathogen interaction)	K13424	NA	DNA-binding WRKY [Macleaya cordata]	NA	2.02079	0.802502	0.803237	8.9756	6.05725	0.90193	1.36274	2.38821	0.869082	2.39185	45.6931	22.5161	10.9453	40.4337	31.9531	19.9949	12.3122	7.0981	89	40	36	480	308	48	66	88	39	111	2481	1111	545	2164	1565	921	573	353
gene-GIB67_000751	JACGCM010000859.1	2995846	2998233	-	GIB67_000751	12123	rna-gnl|WGS:JACGCM|KingUnif01517.1	GO:0003723(RNA binding);GO:0004519(endonuclease activity);GO:0005739(mitochondrion);GO:0006397(mRNA processing);GO:0008270(zinc ion binding);GO:0009507(chloroplast);GO:0016556(mRNA modification)	NA	NA	NA	Pentatricopeptide repeat [Macleaya cordata]	NA	1.30971	0.551555	0.953485	1.69426	1.96484	1.65222	1.83763	2.49532	2.46424	1.06917	2.0043	1.02502	2.33109	0.838612	2.39353	0.449188	0.826796	1.11684	172	81	125	270	298	259	263	272	327	148	325	151	346	134	350	62	115	166
gene-GIB67_000752	JACGCM010000859.1	2990922	2992440	-	GIB67_000752	12121	rna-gnl|WGS:JACGCM|KingUnif04915.1	GO:0000398(mRNA splicing, via spliceosome);GO:0004004(ATP-dependent RNA helicase activity);GO:0005681(spliceosomal complex);GO:0005737(cytoplasm)	03040(Spliceosome)	K12813	EC:3.6.4.13	PREDICTED: pre-mRNA-splicing factor ATP-dependent RNA helicase DEAH1-like isoform X1 [Nelumbo nucifera]	NA	0.79358	0.859976	0.518738	1.20704	2.37757	0.978733	1.73105	1.23389	3.25582	1.12465	0.696612	0.836493	2.26352	0.446298	2.21534	1.31317	1.45901	1.09741	39	47	25	71	133	57	92	50	159	58	42	46	124	27	120	67	75	60
gene-GIB67_000753	JACGCM010000859.1	2992841	2994123	-	GIB67_000753	12122	rna-gnl|WGS:JACGCM|KingUnif02124.1	GO:0000398(mRNA splicing, via spliceosome);GO:0004004(ATP-dependent RNA helicase activity);GO:0005681(spliceosomal complex);GO:0005737(cytoplasm)	03040(Spliceosome)	K12813	EC:3.6.4.13	pre-mRNA-splicing factor ATP-dependent RNA helicase DEAH1-like [Papaver somniferum]	NA	2.01482	1.38351	2.24567	1.33185	3.42387	1.81495	3.41956	2.85279	4.70416	1.01743	0.762509	0.862562	5.18525	0.304639	5.35007	1.74222	1.74818	1.79456	45	35	50	36	88	49	83	53	106	24	21	22	131	9	133	41	42	46
gene-GIB67_000754	JACGCM010000859.1	3168292	3172650	+	GIB67_000754	12128	rna-gnl|WGS:JACGCM|KingUnif06625.1	GO:0005524(ATP binding);GO:0005978(glycogen biosynthetic process);GO:0008878(glucose-1-phosphate adenylyltransferase activity);GO:0009507(chloroplast);GO:0009570(chloroplast stroma);GO:0019252(starch biosynthetic process);GO:0030931(heterotetrameric ADPG pyrophosphorylase complex);GO:0048046(apoplast);GO:0048573(photoperiodism, flowering)	00500(Starch and sucrose metabolism);00520(Amino sugar and nucleotide sugar metabolism)	K00975	EC:2.7.7.27	hypothetical protein CISIN_1g009971mg [Citrus sinensis]	NA	0.521312	1.37246	0.175732	1.54003	0.703918	0	2.74696	1.16642	2.62945	1.09703	0.424889	0.467449	1.37036	0.192131	1.01189	1.45131	0.976009	0.948912	33	96	11	118	52	0	189	61	167	73	33	33	98	15	71	96	65	68
gene-GIB67_000756	JACGCM010000859.1	3269095	3273485	+	GIB67_000756	12132	rna-gnl|WGS:JACGCM|KingUnif37880.1	GO:0005886(plasma membrane)	NA	NA	NA	Target SNARE coiled-coil domain [Macleaya cordata]	NA	7.18552	15.9266	10.6674	118.158	153.231	193.891	12.051	20.5191	7.58692	8.18333	48.1551	173.059	69.1386	152.691	117.042	5.16878	31.1707	12.6028	552	1357	814	11009	13583	17775	1010	1308	589	663	4564	14895	6001	14257	10000	416	2528	1093
gene-GIB67_000757	JACGCM010000859.1	3208205	3212630	+	GIB67_000757	12129	rna-gnl|WGS:JACGCM|KingUnif11423.1	GO:0003700(DNA binding transcription factor activity);GO:0005634(nucleus);GO:0006355(regulation of transcription, DNA-templated);GO:0009585(red, far-red light phototransduction);GO:0009639(response to red or far red light);GO:0010018(far-red light signaling pathway);GO:0042753(positive regulation of circadian rhythm);GO:0045893(positive regulation of transcription, DNA-templated)	NA	NA	NA	protein FAR1-RELATED SEQUENCE 5-like [Papaver somniferum]	NA	9.86391	9.27622	8.58766	4.17411	5.89631	4.73711	11.6081	21.3515	17.618	13.1381	6.3494	4.73359	7.42446	7.89529	6.72617	7.10133	9.58819	10.3989	974	1016	843	500	672	559	1250	1749	1758	1367	774	524	829	948	739	734	1000	1159
gene-GIB67_000758	JACGCM010000859.1	3213970	3227720	-	GIB67_000758	12130	rna-gnl|WGS:JACGCM|KingUnif30622.1	GO:0005737(cytoplasm);GO:0005980(glycogen catabolic process);GO:0008184(glycogen phosphorylase activity);GO:0030170(pyridoxal phosphate binding)	00500(Starch and sucrose metabolism)	K00688	EC:2.4.1.1	PREDICTED: alpha-1,4 glucan phosphorylase L-2 isozyme, chloroplastic/amyloplastic [Nelumbo nucifera]	NA	21.2048	23.2097	33.496	273.671	155.694	282.504	64.7775	55.2323	50.3179	12.4601	87.8098	94.7096	17.9407	50.98	87.0766	57.2149	73.3794	19.3195	4160	5051	6527	65128	35252	66153	13857	8991	9978	2576	21256	20822	3978	12159	19003	11749	15199	4278
gene-GIB67_000759	JACGCM010000859.1	3274002	3275198	-	GIB67_000759	12133	rna-gnl|WGS:JACGCM|KingUnif15671.1	GO:0003674(molecular_function);GO:0008150(biological_process);GO:0016021(integral component of membrane)	00900(Terpenoid backbone biosynthesis)	K15889	EC:3.1.1.-	Pollen Ole e 1 allergen/extensin [Macleaya cordata]	NA	0	0	0.304665	2.28329	3.17264	1.4949	0.1176	0.149726	0.064532	0.100216	1.68956	2.22951	1.39562	3.76363	0.508164	0	0.058414	0.272226	0	0	19	167	221	108	8	8	4	7	126	151	95	275	34	0	4	19
gene-GIB67_000761	JACGCM010000859.1	3332129	3338513	-	GIB67_000761	12134	rna-gnl|WGS:JACGCM|KingUnif16895.1	GO:0004674(protein serine/threonine kinase activity);GO:0005886(plasma membrane);GO:0007166(cell surface receptor signaling pathway)	NA	NA	NA	PREDICTED: wall-associated receptor kinase 2-like [Cucumis melo]	NA	0	0	0	0	0	0	0	0	0.139998	0	0	0	0	0	0	0	0	0	0	0	0	0	0	0	0	0	11	0	0	0	0	0	0	0	0	0
gene-GIB67_000762	JACGCM010000859.1	3474279	3475208	+	GIB67_000762	12140	rna-gnl|WGS:JACGCM|KingUnif08025.1	NA	NA	NA	NA	L10-interacting MYB domain-containing protein [Vitis vinifera]	NA	0.094685	0	0	0	0.963358	1.12937	0	0	0.11825	0	0.672233	0.105611	0	0.621193	0.625479	0	0	0	4	0	0	0	45	54	0	0	5	0	34	5	0	31	28	0	0	0
gene-GIB67_000763	JACGCM010000859.1	3463592	3464685	-	GIB67_000763	12138	rna-gnl|WGS:JACGCM|KingUnif16603.1	GO:0004140(dephospho-CoA kinase activity);GO:0015937(coenzyme A biosynthetic process)	00770(Pantothenate and CoA biosynthesis)	K00859	EC:2.7.1.24	hypothetical protein AQUCO_01700215v1 [Aquilegia coerulea]	NA	6.56304	5.54581	6.53307	7.18026	7.7421	8.60996	7.28444	9.54296	6.24336	5.3226	9.48492	6.91751	7.54644	6.91697	8.03955	8.44289	8.55829	6.06826	335	314	332	445	457	525	406	405	323	287	598	396	436	430	457	452	462	350
gene-GIB67_000764	JACGCM010000859.1	3444702	3460251	-	GIB67_000764	12137	rna-gnl|WGS:JACGCM|KingUnif00559.1	GO:0009505(plant-type cell wall)	00052(Galactose metabolism);00561(Glycerolipid metabolism);00600(Sphingolipid metabolism);00603(Glycosphingolipid biosynthesis - globo and isoglobo series)	K07407	EC:3.2.1.22	hypothetical protein AQUCO_03500014v1 [Aquilegia coerulea]	NA	1.19822	2.57748	1.44878	1.35656	1.23221	1.50052	2.22865	1.06942	2.9898	1.74951	0.662346	1.26561	1.2034	1.06268	1.29406	1.25988	1.18955	0.816041	186	443	223	255	220	277	376	138	468	286	127	220	211	200	223	204	195	143
gene-GIB67_000765	JACGCM010000859.1	3441691	3442110	-	GIB67_000765	12136	rna-gnl|WGS:JACGCM|KingUnif35980.1	NA	NA	NA	NA		NA	16.1826	20.4709	12.5861	10.6401	7.47739	7.62406	16.0727	12.3408	21.1137	17.279	10.8367	10.8938	11.7766	10.1023	12.7731	11.9494	10.6059	9.03377	374	524	289	298	200	210	405	237	493	421	309	282	308	284	328	289	259	236
gene-GIB67_000766	JACGCM010000859.1	3391326	3394171	-	GIB67_000766	12135	rna-gnl|WGS:JACGCM|KingUnif22913.1	NA	NA	NA	NA		NA	0.662511	0.457409	0.24325	0	0.083227	0	0.475094	0.048603	0.430564	0.348624	0.291482	0.055616	0.392556	0.072076	0.052074	0.146411	0.430927	0.057817	25	19	9	0	4	0	19	2	16	14	14	3	17	4	3	6	17	3
gene-GIB67_000767	JACGCM010000859.1	3466088	3466947	-	GIB67_000767	12139	rna-gnl|WGS:JACGCM|KingUnif23678.1	NA	NA	NA	NA		NA	0	0	0	0	0.135965	0.458816	0	0	0	0	0.187372	0.181103	0	0	0.324454	0	0	0	0	0	0	0	3	7	0	0	0	0	3	3	0	0	5	0	0	0
gene-GIB67_000768	JACGCM010000859.1	3489189	3495100	-	GIB67_000768	12141	rna-gnl|WGS:JACGCM|KingUnif33610.1	GO:0000166(nucleotide binding);GO:0005515(protein binding);GO:0005737(cytoplasm)	NA	NA	NA	WD40 repeat [Macleaya cordata]	NA	12.5564	11.3	11.8647	9.93454	9.99999	9.18048	9.91082	13.4694	14.332	14.9441	12.0313	9.30479	11.2733	8.49334	9.98528	8.18373	9.78296	8.6155	1495	1493	1403	1435	1374	1305	1287	1331	1725	1875	1768	1242	1517	1230	1323	1020	1230	1158
gene-GIB67_000769	JACGCM010000859.1	3527664	3529193	-	GIB67_000769	12142	rna-gnl|WGS:JACGCM|KingUnif28609.1	GO:0004519(endonuclease activity);GO:0005634(nucleus);GO:0005777(peroxisome);GO:0006979(response to oxidative stress);GO:0010468(regulation of gene expression)	NA	NA	NA	NYN domain [Macleaya cordata]	NA	8.98101	10.1398	8.8871	12.3855	11.8592	11.1157	12.3209	11.6767	12.9775	10.101	9.05687	7.35652	9.16593	8.14512	7.38272	9.78275	9.69302	8.524	755	946	742	1263	1151	1116	1130	815	1103	895	940	693	871	833	691	861	861	809
gene-GIB67_000770	JACGCM010000859.1	3576944	3589736	-	GIB67_000770	12143	rna-gnl|WGS:JACGCM|KingUnif41989.1	GO:0003993(acid phosphatase activity);GO:0004722(protein serine/threonine phosphatase activity);GO:0005515(protein binding);GO:0005576(extracellular region);GO:0005622(intracellular);GO:0005623(cell);GO:0005737(cytoplasm);GO:0005739(mitochondrion);GO:0005740(mitochondrial envelope);GO:0005768(endosome);GO:0005794(Golgi apparatus);GO:0005802(trans-Golgi network);GO:0006109(regulation of carbohydra…	NA	NA	NA	Phosphoesterase domain [Macleaya cordata]	NA	35.9425	33.2076	39.453	31.2494	26.44	34.1169	29.0626	33.408	37.2066	20.235	15.3296	14.6997	10.4494	12.5006	11.3236	22.1572	14.9671	23.2127	6137	6290	6691	6473	5211	6954	5411	4734	6421	3641	3230	2813	2017	2595	2151	3960	2699	4474
gene-GIB67_000771	JACGCM010000859.1	3604203	3605179	+	GIB67_000771	12144	rna-gnl|WGS:JACGCM|KingUnif37509.1	GO:0003723(RNA binding);GO:0004519(endonuclease activity);GO:0005515(protein binding);GO:0005524(ATP binding);GO:0005739(mitochondrion);GO:0006349(regulation of gene expression by genetic imprinting);GO:0009451(RNA modification);GO:0009507(chloroplast);GO:0009793(embryo development ending in seed dormancy);GO:0009960(endosperm development)	NA	NA	NA	hypothetical protein VITISV_040755 [Vitis vinifera]	NA	0	0	0	6.3213	6.98614	5.64383	0.071197	0	0	0.066436	7.0063	4.12103	5.1058	2.63299	4.80591	0	0	0	0	0	0	376	395	330	4	0	0	4	424	227	283	157	262	0	0	0
gene-GIB67_000773	JACGCM010000859.1	3667497	3667790	-	GIB67_000773	12146	rna-gnl|WGS:JACGCM|KingUnif38449.1	GO:0003824(catalytic activity)	NA	NA	NA	LYR motif-containing protein 4 [Papaver somniferum]	NA	97.8653	110.266	84.1661	63.8188	63.5926	67.4751	75.3851	96.9292	75.3541	100.708	73.6448	79.8615	145.146	96.5322	158.075	155.023	76.6184	141.471	1581	1976	1351	1251	1186	1301	1328	1300	1231	1714	1468	1446	2650	1896	2841	2621	1307	2580
gene-GIB67_000775	JACGCM010000393.1	74584	75921	+	GIB67_000775	4427	rna-gnl|WGS:JACGCM|KingUnif02727.1	GO:0004190(aspartic-type endopeptidase activity);GO:0006508(proteolysis);GO:0030163(protein catabolic process)	NA	NA	NA	Peptidase A1 [Macleaya cordata]	NA	1.15588	0.083395	0	0.120971	0.406596	0.060939	0.178999	0.160242	0.537689	0.346009	0.152448	0.034963	1.46342	1.42718	2.95819	19.0487	8.33302	14.2522	85	7	0	11	35	6	15	10	40	27	14	3	122	128	242	1466	647	1183
gene-GIB67_000776	JACGCM010000393.1	71093	72916	+	GIB67_000776	4426	rna-gnl|WGS:JACGCM|KingUnif37270.1	GO:0005739(mitochondrion);GO:0008150(biological_process);GO:0043231(intracellular membrane-bounded organelle)	NA	NA	NA	Pentatricopeptide repeat [Macleaya cordata]	NA	0.133732	0.029268	0	0.21565	0.439262	0.309795	0.573424	0.223224	0.205769	0.127034	0.326536	0.265852	0.313678	0.297711	0.575124	0.096615	0.416899	0.064013	14	4	0	27	51	38	63	19	21	14	41	30	36	37	65	11	45	8
gene-GIB67_000777	JACGCM010000393.1	57929	59245	+	GIB67_000777	4424	rna-gnl|WGS:JACGCM|KingUnif00494.1	GO:0003677(DNA binding);GO:0003700(DNA binding transcription factor activity);GO:0005634(nucleus);GO:0006351(transcription, DNA-templated);GO:0006355(regulation of transcription, DNA-templated);GO:0046983(protein dimerization activity)	00040(Pentose and glucuronate interconversions);00053(Ascorbate and aldarate metabolism);00520(Amino sugar and nucleotide sugar metabolism)	K16190	EC:2.7.1.43	transcription factor FER-LIKE IRON DEFICIENCY-INDUCED TRANSCRIPTION FACTOR-like protein [Cinnamomum micranthum f. kanehirae]	NA	0	0	0.092884	1.28117	1.25776	1.06542	0	0	0	0.053541	3.92189	9.9812	12.7996	0.882627	5.5238	0	0	0.125433	0	0	4	59	55	48	0	0	0	3	182	421	544	41	231	0	0	6
gene-GIB67_000778	JACGCM010000393.1	21412	26967	+	GIB67_000778	4418	rna-gnl|WGS:JACGCM|KingUnif05185.1	NA	NA	NA	NA	hypothetical protein AQUCO_01400192v1 [Aquilegia coerulea]	NA	27.9681	28.0818	21.1694	35.5617	23.7902	16.1177	56.8737	33.8807	86.5988	28.3171	18.0607	25.08	27.9355	15.0735	27.5753	37.0214	61.2885	19.0882	1462	1628	1099	2254	1435	1006	3240	1469	4573	1559	1165	1469	1650	958	1603	2025	3381	1126
gene-GIB67_000781	JACGCM010000393.1	79228	83367	+	GIB67_000781	4428	rna-gnl|WGS:JACGCM|KingUnif31323.1	NA	NA	NA	NA		NA	0	0	0	0	0	0	0.053428	0	0	0	0	0	0	0	0	0	0	0	0	0	0	0	0	0	8	0	0	0	0	0	0	0	0	0	0	0
gene-GIB67_000783	JACGCM010000393.1	18638	19310	+	GIB67_000783	4417	rna-gnl|WGS:JACGCM|KingUnif29838.1	NA	NA	NA	NA	PREDICTED: uncharacterized protein At1g10890 isoform X1 [Vitis vinifera]	NA	2.32965	2.73663	2.30569	5.23446	5.03941	3.20557	6.79777	5.00893	7.71596	2.05607	6.38104	4.32892	4.11945	2.08582	5.26794	3.39201	5.73439	2.45038	64	84	63	174	160	105	203	114	214	60	216	133	128	70	161	98	166	76
gene-GIB67_000784	JACGCM010000393.1	14775	16242	-	GIB67_000784	4415	rna-gnl|WGS:JACGCM|KingUnif39649.1	GO:0005737(cytoplasm);GO:0005739(mitochondrion);GO:0007568(aging);GO:0008794(arsenate reductase (glutaredoxin) activity);GO:0030611(arsenate reductase activity);GO:0055114(oxidation-reduction process);GO:0071722(detoxification of arsenic-containing substance)	NA	NA	NA	Rhodanese-like domain [Macleaya cordata]	NA	0	0.023584	0	0	0	0	0	0	0	0	0	0	0	0	0.587269	0	0	0	0	1	0	0	0	0	0	0	0	0	0	0	0	0	18	0	0	0
gene-GIB67_000785	JACGCM010000393.1	2484	4581	-	GIB67_000785	4413	rna-gnl|WGS:JACGCM|KingUnif22076.1	GO:0005737(cytoplasm);GO:0005739(mitochondrion);GO:0007568(aging);GO:0008794(arsenate reductase (glutaredoxin) activity);GO:0030611(arsenate reductase activity);GO:0055114(oxidation-reduction process);GO:0071722(detoxification of arsenic-containing substance)	NA	NA	NA	Rhodanese-like domain [Macleaya cordata]	NA	0.340776	0.303987	0.273201	0.082657	0.045837	0.039367	0.128045	0.188805	0.184979	1.23263	0.187375	0.698322	0.023701	0.031916	0	0.053787	0.097733	0.072294	27	27	22	8	5	4	12	13	15	103	19	62	3	4	0	5	9	7
gene-GIB67_000786	JACGCM010000393.1	62144	70676	-	GIB67_000786	4425	rna-gnl|WGS:JACGCM|KingUnif09276.1	GO:0003674(molecular_function);GO:0008150(biological_process);GO:0009507(chloroplast);GO:0009535(chloroplast thylakoid membrane)	NA	NA	NA	hypothetical protein EUGRSUZ_F04381 [Eucalyptus grandis]	NA	0	0	0	0	0	0	0	0	0	0	0.061571	0	0.072616	0	0	0	0	0	0	0	0	0	0	0	0	0	0	0	4	0	4	0	0	0	0	0
gene-GIB67_000788	JACGCM010000393.1	16997	17437	-	GIB67_000788	4416	rna-gnl|WGS:JACGCM|KingUnif29278.1	GO:0003674(molecular_function);GO:0005576(extracellular region);GO:0080167(response to karrikin)	NA	NA	NA	hypothetical protein AQUCO_03700092v1 [Aquilegia coerulea]	NA	0.672603	0.184364	1.59966	15.8664	12.6634	5.03881	0	0.150887	0	0.428265	18.3582	6.99015	4.10724	0.60698	4.82346	0	0	0.089853	13	4	31	367	279	115	0	3	0	9	432	150	89	15	103	0	0	2
gene-GIB67_000790	JACGCM010000393.1	5223	6018	-	GIB67_000790	4414	rna-gnl|WGS:JACGCM|KingUnif03945.1	GO:0003674(molecular_function);GO:0005576(extracellular region);GO:0080167(response to karrikin)	NA	NA	NA	hypothetical protein AQUCO_03700092v1 [Aquilegia coerulea]	NA	0.052945	0.049106	2.99761	0.204298	0	0.021162	0	0	0	0.112946	0	0.01508	0	0	0.390426	0	0	0	2	2	89	8	0	1	0	0	0	4	0	1	0	0	13	0	0	0
gene-GIB67_000791	JACGCM010000393.1	104592	108255	+	GIB67_000791	4431	rna-gnl|WGS:JACGCM|KingUnif22153.1	GO:0005576(extracellular region);GO:0005886(plasma membrane);GO:0006952(defense response);GO:0006955(immune response);GO:0016998(cell wall macromolecule catabolic process);GO:0031225(anchored component of membrane);GO:0042834(peptidoglycan binding);GO:0046658(anchored component of plasma membrane)	NA	NA	NA	Peptidoglycan-binding lysin domain [Macleaya cordata]	NA	3.87499	1.71665	2.57437	1.23574	1.52641	1.23658	3.08674	2.70092	2.40144	4.87347	4.78603	1.43982	32.963	4.34397	39.702	16.494	13.0391	11.8913	350	172	231	136	160	134	304	203	220	464	534	146	3365	477	3989	1560	1244	1213
gene-GIB67_000792	JACGCM010000393.1	114825	131140	+	GIB67_000792	4432	rna-gnl|WGS:JACGCM|KingUnif40395.1	GO:0005886(plasma membrane)	03030(DNA replication);03420(Nucleotide excision repair);03430(Mismatch repair)	K10754	NA	hypothetical protein AQUCO_01400197v1 [Aquilegia coerulea]	NA	1.68783	1.10961	1.61424	6.41567	6.98843	6.667	4.09541	5.9274	4.50574	1.6524	5.54171	5.53003	2.33527	1.92408	4.41804	2.03489	3.27569	1.6516	432	315	410	1990	2062	2035	1142	1258	1165	446	1748	1585	675	598	1257	545	885	477
gene-GIB67_000793	JACGCM010000393.1	91409	93250	+	GIB67_000793	4429	rna-gnl|WGS:JACGCM|KingUnif02742.1	GO:0003723(RNA binding);GO:0004519(endonuclease activity);GO:0005739(mitochondrion);GO:0016554(cytidine to uridine editing);GO:0043231(intracellular membrane-bounded organelle)	NA	NA	NA	hypothetical protein AQUCO_00700832v1 [Aquilegia coerulea]	NA	0.092104	0.143365	0.03542	0.649317	0.895169	0.392097	0.930337	0.839074	1.02609	0.034137	1.21767	0.79329	1.81191	0.160082	1.48831	0.870606	0.456628	0.536405	10	17	4	80	105	48	103	71	105	4	153	90	208	20	168	93	49	62
gene-GIB67_000794	JACGCM010000393.1	100892	102498	+	GIB67_000794	4430	rna-gnl|WGS:JACGCM|KingUnif17821.1	GO:0005516(calmodulin binding);GO:0005634(nucleus);GO:0009733(response to auxin)	04075(Plant hormone signal transduction)	K14488	NA	hypothetical protein AQUCO_01400195v1 [Aquilegia coerulea]	NA	1.29204	1.14988	1.89606	11.7266	7.88991	7.49839	5.05474	4.51287	5.38455	0.53166	17.2937	17.8287	2.05351	1.24588	2.28846	7.15737	7.06445	4.55656	29	28	42	312	200	197	121	83	120	13	468	438	51	34	56	165	164	113
gene-GIB67_000795	JACGCM010000393.1	154735	161874	-	GIB67_000795	4435	rna-gnl|WGS:JACGCM|KingUnif09041.1	GO:0003951(NAD+ kinase activity);GO:0004143(diacylglycerol kinase activity);GO:0005524(ATP binding);GO:0005634(nucleus);GO:0006952(defense response);GO:0007205(protein kinase C-activating G-protein coupled receptor signaling pathway);GO:0009409(response to cold);GO:0009611(response to wounding);GO:0016021(integral component of membrane);GO:0016310(phosphorylation);GO:0035556(intracellular signal …	00561(Glycerolipid metabolism);00564(Glycerophospholipid metabolism);04070(Phosphatidylinositol signaling system)	K00901	EC:2.7.1.107	Diacylglycerol kinase [Macleaya cordata]	NA	69.6816	48.7387	59.8536	23.615	22.8523	25.9053	62.8451	81.7488	73.5107	120.957	42.4569	27.3778	60.6155	133.851	25.5999	26.9596	34.3956	26.7255	10301	7993	8789	4235	3900	4572	10131	10028	10984	18843	7745	4536	10127	24056	4210	4172	5369	4460
gene-GIB67_000796	JACGCM010000393.1	162670	163489	-	GIB67_000796	4436	rna-gnl|WGS:JACGCM|KingUnif42117.1	NA	NA	NA	NA		NA	0	0	0	0	0	0	0	0	0	0	0	0.063915	0	0	0	0	0	0	0	0	0	0	0	0	0	0	0	0	0	3	0	0	0	0	0	0
gene-GIB67_000797	JACGCM010000393.1	147964	153882	-	GIB67_000797	4434	rna-gnl|WGS:JACGCM|KingUnif10854.1	GO:0005524(ATP binding);GO:0005634(nucleus);GO:0005886(plasma membrane);GO:0016308(1-phosphatidylinositol-4-phosphate 5-kinase activity)	00562(Inositol phosphate metabolism);04070(Phosphatidylinositol signaling system);04144(Endocytosis)	K00889	EC:2.7.1.68	Phosphatidylinositol-4-phosphate 5-kinase [Macleaya cordata]	NA	12.4094	9.05309	8.12451	18.1143	10.6355	12.9086	13.0132	17.9413	17.4924	7.4132	17.5296	17.9763	7.58095	3.71443	5.88243	3.49531	6.48339	8.73359	1345	1088	875	2381	1330	1670	1538	1613	1916	847	2344	2183	929	490	709	397	742	1068
gene-GIB67_000798	JACGCM010000393.1	135269	139735	-	GIB67_000798	4433	rna-gnl|WGS:JACGCM|KingUnif41596.1	GO:0005524(ATP binding);GO:0005634(nucleus);GO:0005886(plasma membrane);GO:0016308(1-phosphatidylinositol-4-phosphate 5-kinase activity)	00562(Inositol phosphate metabolism);04070(Phosphatidylinositol signaling system);04144(Endocytosis)	K00889	EC:2.7.1.68	Phosphatidylinositol-4-phosphate 5-kinase [Macleaya cordata]	NA	16.6577	15.4872	10.6943	19.3364	13.9253	11.5805	17.0433	19.7221	15.6684	16.3821	13.8648	20.3738	10.7013	5.25328	9.09161	12.4811	11.041	10.5977	624	643	398	878	602	518	696	613	593	646	641	855	453	239	379	489	437	448
gene-GIB67_000799	JACGCM010000393.1	281235	282374	+	GIB67_000799	4442	rna-gnl|WGS:JACGCM|KingUnif03857.1	GO:0006950(response to stress);GO:0016787(hydrolase activity)	NA	NA	NA	hypothetical protein VITISV_006651 [Vitis vinifera]	NA	2.52498	2.46459	0.853875	0	0.179506	0.051978	1.21569	1.75006	1.70065	1.08161	2.41133	0.070729	15.6376	0.176935	35.5861	1.65839	1.62957	0.750906	124	134	42	0	11	4	65	71	84	56	146	4	863	11	1932	85	84	42
gene-GIB67_000800	JACGCM010000393.1	255410	265262	+	GIB67_000800	4441	rna-gnl|WGS:JACGCM|KingUnif26852.1	GO:0004712(protein serine/threonine/tyrosine kinase activity);GO:0005737(cytoplasm);GO:0006468(protein phosphorylation);GO:0016301(kinase activity)	NA	NA	NA	PREDICTED: serine/threonine-protein kinase HT1-like isoform X3 [Nelumbo nucifera]	NA	0	0	0	0	0	0	0	0	0	0	0	0	0	0.028777	0.031548	0	0	0	0	0	0	0	0	0	0	0	0	0	0	0	0	5	5	0	0	0
gene-GIB67_000802	JACGCM010000393.1	226311	229130	-	GIB67_000802	4440	rna-gnl|WGS:JACGCM|KingUnif31768.1	GO:0000272(polysaccharide catabolic process);GO:0005576(extracellular region);GO:0009507(chloroplast);GO:0016161(beta-amylase activity);GO:0102229(amylopectin maltohydrolase activity)	00500(Starch and sucrose metabolism)	K01177	EC:3.2.1.2	hypothetical protein VITISV_005286 [Vitis vinifera]	NA	0.499279	1.60314	0.273849	0.353876	2.22388	1.22714	4.1464	3.3575	8.18674	2.76504	11.7984	0.339865	2.92379	42.9256	51.8914	93.9599	67.4608	36.6707	47	165	26	40	238	136	418	258	765	270	1346	36	306	4823	5334	9088	6582	3825
gene-GIB67_000803	JACGCM010000393.1	200641	208874	-	GIB67_000803	4437	rna-gnl|WGS:JACGCM|KingUnif36981.1	GO:0003674(molecular_function);GO:0005739(mitochondrion);GO:0008150(biological_process);GO:0009507(chloroplast)	NA	NA	NA	F-box domain [Macleaya cordata]	NA	7.18321	8.2796	8.4099	8.69164	8.86618	8.48775	6.81921	8.7381	7.22451	7.04534	8.43671	6.06758	9.01255	7.12443	8.0438	7.18602	4.93158	8.25026	598	764	695	877	851	843	619	603	607	618	866	566	847	720	744	626	433	775
gene-GIB67_000807	JACGCM010000393.1	299737	308344	-	GIB67_000807	4444	rna-gnl|WGS:JACGCM|KingUnif15133.1	GO:0005457(GDP-fucose transmembrane transporter activity);GO:0005459(UDP-galactose transmembrane transporter activity);GO:0005460(UDP-glucose transmembrane transporter activity);GO:0005794(Golgi apparatus);GO:0005886(plasma membrane);GO:0008514(organic anion transmembrane transporter activity);GO:0008643(carbohydrate transport);GO:0015783(GDP-fucose transmembrane transport);GO:0015786(UDP-glucose…	NA	NA	NA	PREDICTED: LOW QUALITY PROTEIN: UDP-galactose transporter 1 [Pyrus x bretschneideri]	NA	21.6801	20.702	13.7988	32.1555	32.8917	34.8817	18.0425	21.4516	19.4446	28.0913	25.1744	23.2899	35.2554	10.5624	37.58	28.5619	23.8096	27.0591	1661	1759	1050	2988	2908	3189	1507	1364	1506	2267	2379	1999	3052	984	3202	2290	1926	2339
gene-GIB67_000808	JACGCM010000393.1	331122	331469	-	GIB67_000808	4446	rna-gnl|WGS:JACGCM|KingUnif28079.1	GO:0003674(molecular_function);GO:0005739(mitochondrion);GO:0008150(biological_process);GO:0009507(chloroplast)	NA	NA	NA	hypothetical protein AQUCO_01400207v1 [Aquilegia coerulea]	NA	11.5756	9.6607	7.76572	4.65172	5.87609	3.33631	13.0442	5.24484	8.27825	11.3649	6.33617	6.0268	16.1757	9.57535	11.4164	5.61567	7.9333	13.0692	222	205	148	108	130	77	272	84	160	229	150	130	350	223	243	113	161	283
gene-GIB67_000809	JACGCM010000393.1	327295	327714	-	GIB67_000809	4445	rna-gnl|WGS:JACGCM|KingUnif27936.1	GO:0003674(molecular_function);GO:0005739(mitochondrion);GO:0008150(biological_process);GO:0009507(chloroplast)	NA	NA	NA	hypothetical protein BVC80_1277g8 [Macleaya cordata]	NA	0.570953	1.61331	1.01205	0.131954	0	0.014524	0.512475	0	1.09831	0.548949	0.023417	0	0.132442	0.827087	0.107014	0.758015	1.59927	0.573923	14	42	24	4	0	1	13	0	26	14	1	0	4	24	3	19	39	15
gene-GIB67_000811	JACGCM010000393.1	477303	480441	+	GIB67_000811	4456	rna-gnl|WGS:JACGCM|KingUnif14172.1	GO:0003959(NADPH dehydrogenase activity);GO:0005777(peroxisome);GO:0009695(jasmonic acid biosynthetic process);GO:0016629(12-oxophytodienoate reductase activity);GO:0031408(oxylipin biosynthetic process)	00592(alpha-Linolenic acid metabolism)	K05894	EC:1.3.1.42	hypothetical protein AQUCO_01000025v1 [Aquilegia coerulea]	NA	11.1507	13.9106	17.4088	56.7184	49.2413	71.1177	50.437	49.9537	29.226	14.2151	172.523	159.852	56.1002	65.4233	80.3241	29.2237	50.2924	15.2285	917	1270	1423	5659	4674	6982	4523	3409	2430	1232	17507	14733	5214	6541	7349	2516	4367	1414
gene-GIB67_000812	JACGCM010000393.1	446733	467848	+	GIB67_000812	4454	rna-gnl|WGS:JACGCM|KingUnif38829.1	GO:0000932(P-body);GO:0005515(protein binding);GO:0005634(nucleus);GO:0005737(cytoplasm);GO:0007033(vacuole organization);GO:0007034(vacuolar transport);GO:0007165(signal transduction);GO:0009737(response to abscisic acid);GO:0009825(multidimensional cell growth);GO:0010090(trichome morphogenesis);GO:0033962(cytoplasmic mRNA processing body assembly);GO:0071472(cellular response to salt stress);G…	NA	NA	NA	BEACH domain [Macleaya cordata]	NA	4.2143	8.83494	4.20098	15.8779	13.4254	20.0373	9.1595	11.9888	10.2313	6.24145	8.0067	18.1498	8.94379	15.0414	15.9821	9.81183	10.5888	12.098	2737	6365	2710	12508	10062	15531	6486	6460	6715	4271	6416	13208	6564	11874	11545	6669	7260	8867
gene-GIB67_000813	JACGCM010000393.1	373522	374468	+	GIB67_000813	4449	rna-gnl|WGS:JACGCM|KingUnif31701.1	GO:0004707(MAP kinase activity);GO:0005515(protein binding);GO:0005524(ATP binding);GO:0005634(nucleus);GO:0005737(cytoplasm);GO:0007165(signal transduction);GO:0010311(lateral root formation);GO:0010468(regulation of gene expression);GO:0016301(kinase activity);GO:0035556(intracellular signal transduction)	04933(AGE-RAGE signaling pathway in diabetic complications)	K04371	EC:2.7.11.24	hypothetical protein GOBAR_AA29197 [Gossypium barbadense]	NA	0	0.160734	0.139541	0.195575	0.121597	0.063992	0.171198	0.205468	0.530429	0.172269	0.231285	0.216594	0.612477	0	0.506098	0.297223	0.365836	0.148411	0	9	7	11	7	4	9	8	25	9	14	12	32	0	26	15	18	8
gene-GIB67_000814	JACGCM010000393.1	392388	402528	+	GIB67_000814	4452	rna-gnl|WGS:JACGCM|KingUnif35479.1	GO:0004707(MAP kinase activity);GO:0005515(protein binding);GO:0005524(ATP binding);GO:0005634(nucleus);GO:0005737(cytoplasm);GO:0007165(signal transduction);GO:0010311(lateral root formation);GO:0010468(regulation of gene expression);GO:0016301(kinase activity);GO:0035556(intracellular signal transduction)	04933(AGE-RAGE signaling pathway in diabetic complications)	K04371	EC:2.7.11.24	Protein kinase domain [Macleaya cordata]	NA	0	0.183742	0	0.523789	0.178164	0.129535	0.433434	0.093782	1.07038	0.155143	0.040747	0.819959	0.422165	0	0.348317	0.373185	0.362214	0.215839	0	12	0	38	12	10	28	5	64	10	3	54	28	0	23	23	23	15
gene-GIB67_000815	JACGCM010000393.1	468219	473993	+	GIB67_000815	4455	rna-gnl|WGS:JACGCM|KingUnif33654.1	GO:0005524(ATP binding);GO:0005634(nucleus);GO:0005886(plasma membrane);GO:0016301(kinase activity);GO:0016787(hydrolase activity)	NA	NA	NA	hypothetical protein AQUCO_00400555v1 [Aquilegia coerulea]	NA	0.177453	0.442683	0.449713	0.261729	0.511466	0.345631	0.321101	0.449256	0.455494	0.165712	0.509918	0.631648	1.59951	0.334207	2.14808	0.644243	0.881395	0.208825	16	44	40	29	53	37	32	34	42	16	57	64	162	37	214	61	84	22
gene-GIB67_000817	JACGCM010000393.1	376674	378602	+	GIB67_000817	4450	rna-gnl|WGS:JACGCM|KingUnif27118.1	GO:0004707(MAP kinase activity);GO:0005515(protein binding);GO:0005524(ATP binding);GO:0005634(nucleus);GO:0005737(cytoplasm);GO:0007165(signal transduction);GO:0010311(lateral root formation);GO:0010468(regulation of gene expression);GO:0016301(kinase activity);GO:0035556(intracellular signal transduction)	04933(AGE-RAGE signaling pathway in diabetic complications)	K04371	EC:2.7.11.24	PREDICTED: mitogen-activated protein kinase homolog NTF6 [Vitis vinifera]	NA	0	0	0	0	0	0	0	0.470257	0.661127	0	0	0	0	0.191493	0	0.591207	0.805063	0.252574	0	0	0	0	0	0	0	10	17	0	0	0	0	6	0	15	21	7
gene-GIB67_000818	JACGCM010000393.1	388238	389025	+	GIB67_000818	4451	rna-gnl|WGS:JACGCM|KingUnif19656.1	NA	NA	NA	NA		NA	0	0	0	0	0.177168	0	0.331695	0	0.765275	0	0	0.721072	0	0	0	0	0	0	0	0	0	0	9	0	16	0	33	0	0	34	0	0	0	0	0	0
gene-GIB67_000820	JACGCM010000393.1	555626	556675	+	GIB67_000820	4462	rna-gnl|WGS:JACGCM|KingUnif35316.1	GO:0008422(beta-glucosidase activity);GO:1901657(glycosyl compound metabolic process)	00500(Starch and sucrose metabolism);00460(Cyanoamino acid metabolism);00940(Phenylpropanoid biosynthesis)	K01188	EC:3.2.1.21	Glycoside hydrolase [Macleaya cordata]	NA	5.96473	10.449	5.44614	2.49807	0.364907	0.343925	4.53437	2.24808	3.5992	4.17596	0.190329	1.64309	4.23405	0.111229	1.61373	5.23356	6.43954	0.806051	345	669	313	175	25	24	286	108	210	254	14	107	276	8	104	316	393	53
gene-GIB67_000821	JACGCM010000393.1	501391	508774	-	GIB67_000821	4458	rna-gnl|WGS:JACGCM|KingUnif25289.1	GO:0003723(RNA binding);GO:0004519(endonuclease activity);GO:0005739(mitochondrion);GO:0009451(RNA modification);GO:0009507(chloroplast);GO:0043231(intracellular membrane-bounded organelle)	NA	NA	NA	Pentatricopeptide repeat [Macleaya cordata]	NA	6.25835	6.21831	6.19427	5.08771	4.78203	5.28534	6.02183	5.22744	7.20049	2.60266	1.99234	2.64405	4.20225	1.03003	5.81292	2.95978	2.99334	2.46386	779	859	766	768	687	786	818	540	906	342	306	369	591	156	805	386	394	347
gene-GIB67_000822	JACGCM010000393.1	498101	499700	-	GIB67_000822	4457	rna-gnl|WGS:JACGCM|KingUnif40988.1	GO:0003677(DNA binding);GO:0003700(DNA binding transcription factor activity);GO:0005634(nucleus);GO:0006351(transcription, DNA-templated);GO:0006355(regulation of transcription, DNA-templated);GO:0046983(protein dimerization activity)	04016(MAPK signaling pathway - plant);04075(Plant hormone signal transduction)	K13422	NA	hypothetical protein AQUCO_01000012v1 [Aquilegia coerulea]	NA	0	0	0	0	0	0	0	0.085673	0.044284	0	0	0	0.095948	0	0.064121	0.384174	3.19194	1.0075	0	0	0	0	0	0	0	4	3	0	0	0	7	0	4	23	188	64
gene-GIB67_000823	JACGCM010000393.1	535287	541793	-	GIB67_000823	4460	rna-gnl|WGS:JACGCM|KingUnif15444.1	GO:0003674(molecular_function);GO:0005739(mitochondrion);GO:0008150(biological_process)	NA	NA	NA	hypothetical protein BVC80_1701g43 [Macleaya cordata]	NA	7.15196	6.37771	5.62871	6.30163	6.57398	4.31706	6.8778	9.08118	6.6373	7.46772	5.88806	4.50681	9.41876	4.69842	9.7149	7.77902	7.48471	7.35881	396	392	310	423	420	286	415	417	372	436	402	280	589	316	598	451	438	460
gene-GIB67_000825	JACGCM010000393.1	556787	563140	-	GIB67_000825	4463	rna-gnl|WGS:JACGCM|KingUnif38354.1	NA	NA	NA	NA		NA	1.65766	2.4038	0.942856	0.538328	0	0	0.55833	0.181673	0.399064	1.39578	0	0.158927	1.13205	0	0.231002	0.757351	0.965526	0	76	123	43	30	0	0	28	7	19	68	0	9	59	0	12	37	47	0
gene-GIB67_000828	JACGCM010000824.1	12300	13160	-	GIB67_000828	11527	rna-gnl|WGS:JACGCM|KingUnif13862.1	GO:0000175(3'-5'-exoribonuclease activity);GO:0000288(nuclear-transcribed mRNA catabolic process, deadenylation-dependent decay);GO:0030014(CCR4-NOT complex)	03018(RNA degradation)	K12581	NA	PREDICTED: putative CCR4-associated factor 1 homolog 8 [Pyrus x bretschneideri]	NA	0	0	0	0	0	0	0	0	0	0	0	0	0.013033	0	0	0	0	0	0	0	0	0	0	0	0	0	0	0	0	0	1	0	0	0	0	0
gene-GIB67_000829	JACGCM010002529.1	4589	16216	-	GIB67_000829	37997	rna-gnl|WGS:JACGCM|KingUnif40689.1	GO:0005886(plasma membrane);GO:0006810(transport);GO:0022857(transmembrane transporter activity)	NA	NA	NA	Drug/metabolite transporter [Macleaya cordata]	NA	21.1519	23.2856	24.8084	45.7777	48.2013	50.2375	33.0519	34.5208	31.7408	17.944	8.67832	30.235	6.676	7.94714	9.30567	15.1847	10.2952	16.5603	1759	2148	2049	4616	4624	4985	2996	2381	2667	1572	891	2817	628	804	861	1322	904	1554
gene-GIB67_000831	JACGCM010000364.1	2182	5038	-	GIB67_000831	4093	rna-gnl|WGS:JACGCM|KingUnif38746.1	GO:0004674(protein serine/threonine kinase activity);GO:0005634(nucleus);GO:0005737(cytoplasm);GO:0006468(protein phosphorylation);GO:0035556(intracellular signal transduction)	04016(MAPK signaling pathway - plant);04075(Plant hormone signal transduction)	K14498	EC:2.7.11.1	hypothetical protein C5167_014039 [Papaver somniferum]	NA	7.1063	11.0687	11.6082	20.727	14.7144	18.8835	15.5918	18.2175	17.2304	7.49678	16.1654	10.3012	20.5356	12.5559	15.9857	13.2545	13.5936	9.20695	389	672	631	1376	930	1234	931	828	953	433	1092	632	1270	836	973	760	786	569
gene-GIB67_000832	JACGCM010002340.1	26580	28967	-	GIB67_000832	36202	rna-gnl|WGS:JACGCM|KingUnif31175.1	GO:0004674(protein serine/threonine kinase activity);GO:0005886(plasma membrane);GO:0006468(protein phosphorylation)	NA	NA	NA	hypothetical protein AQUCO_02600432v1 [Aquilegia coerulea]	NA	0.902429	1.00224	1.14167	37.398	20.6297	24.2748	28.3317	22.9021	30.8777	0.947533	0.171273	3.7811	3.19834	3.19307	6.24561	21.2509	1.25537	20.7733	119	146	149	5952	3124	3802	4053	2493	4095	131	28	556	475	510	912	2919	174	3076
gene-GIB67_000833	JACGCM010002340.1	8040	10424	-	GIB67_000833	36199	rna-gnl|WGS:JACGCM|KingUnif10309.1	GO:0004674(protein serine/threonine kinase activity);GO:0005886(plasma membrane);GO:0006468(protein phosphorylation)	NA	NA	NA	hypothetical protein AQUCO_00500462v1 [Aquilegia coerulea]	NA	0.66947	0.604516	0.764375	30.3056	21.5447	26.7391	19.4183	7.92807	10.5782	0.679273	0.44786	0.632391	1.41231	2.82219	0.954182	2.8681	2.24827	3.22378	88	88	100	4817	3258	4182	2775	862	1401	94	73	93	210	450	140	394	312	477
gene-GIB67_000834	JACGCM010002340.1	18228	21037	-	GIB67_000834	36201	rna-gnl|WGS:JACGCM|KingUnif20818.1	GO:0003924(GTPase activity);GO:0005622(intracellular);GO:0006412(translation)	NA	NA	NA	Lipase [Macleaya cordata]	NA	0.653238	0.580101	0.59846	0.225389	0.236129	0.265707	0.230798	0.231952	0.443075	0.73925	0.275587	0.508524	0.35181	1.57831	2.32639	0.196464	0.079441	1.34308	78	77	71	33	33	38	30	23	54	93	41	68	48	229	308	25	10	181
gene-GIB67_000835	JACGCM010002340.1	12968	16653	-	GIB67_000835	36200	rna-gnl|WGS:JACGCM|KingUnif29342.1	GO:0005451(monovalent cation:proton antiporter activity);GO:0006885(regulation of pH);GO:0012505(endomembrane system)	NA	NA	NA	cation/H(+) antiporter 15-like [Cajanus cajan]	NA	0.115764	0	0.162577	88.8074	31.8329	24.43	91.1867	54.4699	155.571	0.223926	0.094104	5.09707	0.146506	0.105663	0.147637	0.285393	0.159583	0.062841	9	0	13	8091	2760	2190	7467	3395	11809	18	9	429	13	10	13	23	13	6
gene-GIB67_000838	JACGCM010000633.1	132995	133634	+	GIB67_000838	7607	rna-gnl|WGS:JACGCM|KingUnif36613.1	GO:0004650(polygalacturonase activity);GO:0005576(extracellular region);GO:0005975(carbohydrate metabolic process);GO:0016829(lyase activity);GO:0071555(cell wall organization)	00040(Pentose and glucuronate interconversions)	K01184	EC:3.2.1.15	hypothetical protein AQUCO_02000127v1 [Aquilegia coerulea]	NA	0	0	0	0	0	0	0	0	0	0	0	0	0	0	0.188134	0	0	0	0	0	0	0	0	0	0	0	0	0	0	0	0	0	6	0	0	0
gene-GIB67_000839	JACGCM010000633.1	140132	142503	+	GIB67_000839	7608	rna-gnl|WGS:JACGCM|KingUnif33597.1	NA	NA	NA	NA	uncharacterized protein LOC113360045 [Papaver somniferum]	NA	2.60539	4.57125	1.0204	1.75588	0.623599	1.06635	1.39713	1.75707	2.9677	3.93933	1.13532	1.22757	3.46166	2.2495	1.34346	1.24535	1.76026	1.79616	203	395	79	166	56	100	119	114	234	323	109	108	305	213	117	102	145	158
gene-GIB67_000840	JACGCM010000633.1	145022	145768	+	GIB67_000840	7609	rna-gnl|WGS:JACGCM|KingUnif24587.1	NA	04120(Ubiquitin mediated proteolysis)	K04706	NA	Ribonuclease H domain [Macleaya cordata]	NA	26.4294	47.6695	17.5914	8.50033	7.34305	4.34841	11.8846	9.60437	18.8741	51.3673	5.69477	7.47406	28.1022	20.6248	9.88046	20.8391	18.7721	23.8207	1085	2171	718	424	348	213	532	328	783	2222	289	344	1304	1029	452	896	814	1104
gene-GIB67_000841	JACGCM010000633.1	309536	313820	+	GIB67_000841	7613	rna-gnl|WGS:JACGCM|KingUnif20856.1	GO:0006474(N-terminal protein amino acid acetylation);GO:0008080(N-acetyltransferase activity)	NA	NA	NA	N-acetyltransferase 9-like protein [Papaver somniferum]	NA	17.1896	28.7143	12.7821	9.11069	6.68103	5.57395	13.3325	11.0929	18.0805	13.8781	4.09451	4.77261	7.04778	2.28888	7.79886	5.39383	13.6046	6.29705	1213	2247	896	780	544	470	1026	650	1290	1032	357	378	562	197	612	399	1014	502
gene-GIB67_000843	JACGCM010000633.1	307515	308438	-	GIB67_000843	7612	rna-gnl|WGS:JACGCM|KingUnif02147.1	NA	NA	NA	NA		NA	0	0	0	0	0	0	0	0	0.273111	0	0	0	0	0	0	0	0	0	0	0	0	0	0	0	0	0	13	0	0	0	0	0	0	0	0	0
gene-GIB67_000844	JACGCM010000633.1	295352	303044	-	GIB67_000844	7610	rna-gnl|WGS:JACGCM|KingUnif29718.1	GO:0003676(nucleic acid binding);GO:0003723(RNA binding);GO:0003968(RNA-directed 5'-3' RNA polymerase activity);GO:0005634(nucleus);GO:0006952(defense response);GO:0009615(response to virus);GO:0009751(response to salicylic acid);GO:0010025(wax biosynthetic process);GO:0016441(posttranscriptional gene silencing);GO:0030422(production of siRNA involved in RNA interference);GO:0060148(positive regu…	NA	NA	NA	hypothetical protein AQUCO_00201270v1 [Aquilegia coerulea]	NA	0	0	0.042445	0.041261	0	0	0.102127	0.07935	0.064311	0	0	0	0	0	0	0	0	0.062202	0	0	4	4	0	0	9	6	6	0	0	0	0	0	0	0	0	6
gene-GIB67_000845	JACGCM010000633.1	594930	598286	+	GIB67_000845	7617	rna-gnl|WGS:JACGCM|KingUnif02209.1	GO:0004674(protein serine/threonine kinase activity);GO:0005886(plasma membrane);GO:0006468(protein phosphorylation);GO:0006952(defense response);GO:0009506(plasmodesma)	NA	NA	NA	Putative serine/threonine-protein kinase receptor [Cajanus cajan]	NA	0.025226	0	0.12748	0.139608	0.022069	0.073249	0.104442	0.089433	0.218079	0.134106	0	0	0.222139	0.201052	0	0	0.068545	0.038731	2	0	7	10	2	5	7	5	13	8	0	0	14	14	0	0	4	3
gene-GIB67_000846	JACGCM010000633.1	558598	558993	+	GIB67_000846	7615	rna-gnl|WGS:JACGCM|KingUnif06567.1	NA	NA	NA	NA	Pentatricopeptide repeat [Macleaya cordata]	NA	0	0	0	0	0	0	0	0	0	0	0	0	0.052066	0	0.065565	0	0	0	0	0	0	0	0	0	0	0	0	0	0	0	2	0	2	0	0	0
gene-GIB67_000848	JACGCM010000633.1	606744	609492	-	GIB67_000848	7618	rna-gnl|WGS:JACGCM|KingUnif00203.1	NA	NA	NA	NA	hypothetical protein AQUCO_07300004v1 [Aquilegia coerulea]	NA	0.549238	0.995176	0.232274	0.068198	0.074895	0.055889	0.270315	0.226984	0.599054	0.561954	0.104907	0.138592	0.490413	0.24525	0.193842	0.368126	0.526899	0.525043	28	55	12	5	5	4	15	10	31	30	7	8	28	15	11	20	28	30
gene-GIB67_000850	JACGCM010000988.1	10852	26453	+	GIB67_000850	13810	rna-gnl|WGS:JACGCM|KingUnif39543.1	GO:0000166(nucleotide binding);GO:0005634(nucleus);GO:0005834(heterotrimeric G-protein complex);GO:0008150(biological_process);GO:0080008(Cul4-RING E3 ubiquitin ligase complex)	03040(Spliceosome)	K12857	NA	hypothetical protein AQUCO_02700047v1 [Aquilegia coerulea]	NA	13.4941	11.4434	13.0927	12.6554	10.117	9.07474	13.4691	15.9812	12.3619	9.21392	14.9759	16.6436	22.9693	11.9311	20.0409	10.659	11.1925	6.90347	1141	1073	1099	1298	987	916	1241	1121	1056	821	1562	1576	2194	1226	1884	943	999	659
gene-GIB67_000851	JACGCM010000988.1	20780	21739	-	GIB67_000851	13811	rna-gnl|WGS:JACGCM|KingUnif00165.1	GO:0005737(cytoplasm)	04016(MAPK signaling pathway - plant)	K20604	EC:2.7.12.2	mitogen-activated protein kinase kinase 9-like protein [Cinnamomum micranthum f. kanehirae]	NA	0	0.063928	0	0	0	0	0	0	0	0	0	0	0	0.030986	0	0	0	0	0	4	0	0	0	0	0	0	0	0	0	0	0	2	0	0	0	0
gene-GIB67_000853	JACGCM010002325.1	46150	56541	+	GIB67_000853	35685	rna-gnl|WGS:JACGCM|KingUnif40640.1	GO:0003924(GTPase activity);GO:0005622(intracellular);GO:0006412(translation);GO:0032790(ribosome disassembly)	03015(mRNA surveillance pathway)	K14416	NA	elongation factor 1-alpha-like isoform X3 [Papaver somniferum]	NA	2.67744	4.25436	1.83835	5.60036	10.854	9.8051	1.40002	2.8877	2.07544	2.35156	12.5844	5.15839	3.44245	4.88758	8.93346	1.10226	1.57652	2.30449	367	647	251	931	1716	1603	210	329	288	340	2127	792	533	814	1362	159	228	357
gene-GIB67_000854	JACGCM010002325.1	25945	27587	+	GIB67_000854	35683	rna-gnl|WGS:JACGCM|KingUnif27532.1	GO:0003674(molecular_function);GO:0005886(plasma membrane);GO:0008150(biological_process);GO:0016021(integral component of membrane)	NA	NA	NA	protein PLANT CADMIUM RESISTANCE 6-like [Papaver somniferum]	NA	0	0	0	0	0	0	0	0	0	0	0	0	0.113102	0	2.27904	0	0	0	0	0	0	0	0	0	0	0	0	0	0	0	9	0	171	0	0	0
gene-GIB67_000855	JACGCM010002325.1	6610	14472	+	GIB67_000855	35682	rna-gnl|WGS:JACGCM|KingUnif31215.1	GO:0000373(Group II intron splicing);GO:0000724(double-strand break repair via homologous recombination);GO:0003677(DNA binding);GO:0003690(double-stranded DNA binding);GO:0003697(single-stranded DNA binding);GO:0005515(protein binding);GO:0005634(nucleus);GO:0005739(mitochondrion);GO:0006281(DNA repair);GO:0050897(cobalt ion binding)	NA	NA	NA	DNA repair RAD52-like protein 1, mitochondrial [Cinnamomum micranthum f. kanehirae]	NA	13.4849	17.8689	18.4811	17.1375	17.609	15.1445	20.1723	21.2436	23.1321	20.3801	16.9094	15.7766	29.8801	19.6909	27.0401	18.542	21.6407	15.1786	1046	1537	1423	1612	1576	1402	1706	1367	1813	1665	1618	1371	2618	1856	2332	1505	1772	1329
gene-GIB67_000856	JACGCM010002325.1	71527	80551	+	GIB67_000856	35687	rna-gnl|WGS:JACGCM|KingUnif11769.1	GO:0004526(ribonuclease P activity);GO:0005655(nucleolar ribonuclease P complex);GO:0090502(RNA phosphodiester bond hydrolysis, endonucleolytic)	NA	NA	NA	Protein suppressor of gene silencing 3 [Vitis vinifera]	NA	73.9165	55.8376	35.1386	140.451	46.4057	41.6876	32.8248	52.031	49.0774	108.896	160.932	111.288	131.709	121.812	123.978	90.3958	80.4329	88.0943	9295	7790	4389	21425	6735	6258	4501	5430	6238	14430	24971	15683	18717	18622	17343	11899	10679	12504
gene-GIB67_000857	JACGCM010002325.1	33541	41155	+	GIB67_000857	35684	rna-gnl|WGS:JACGCM|KingUnif00697.1	GO:0003723(RNA binding);GO:0003729(mRNA binding);GO:0005576(extracellular region);GO:0008150(biological_process)	03040(Spliceosome)	K12741	NA	PREDICTED: RNA-binding protein 24 isoform X2 [Vitis vinifera]	NA	14.1225	8.12841	14.7808	26.7934	14.8994	13.209	14.4022	23.046	30.071	48.2301	93.8543	58.5848	30.6927	50.6173	55.0351	51.3509	48.6289	56.9603	1028	657	1069	2366	1252	1148	1144	1392	2213	3700	8430	4779	2525	4480	4457	3913	3738	4680
gene-GIB67_000858	JACGCM010002325.1	84112	85274	-	GIB67_000858	35688	rna-gnl|WGS:JACGCM|KingUnif42232.1	NA	NA	NA	NA	hypothetical protein AQUCO_00300371v1 [Aquilegia coerulea]	NA	0	0	0	0	0	0.207865	0	0	0	0	0	0	0.082558	0	0.229731	0	0	0	0	0	0	0	0	10	0	0	0	0	0	0	4	0	11	0	0	0
gene-GIB67_000859	JACGCM010002325.1	155460	157219	+	GIB67_000859	35696	rna-gnl|WGS:JACGCM|KingUnif23715.1	GO:0003723(RNA binding);GO:0005739(mitochondrion);GO:0008150(biological_process)	00500(Starch and sucrose metabolism)	K00700	EC:2.4.1.18	APO protein 3, mitochondrial [Citrus sinensis]	NA	0.252377	0.215439	0.348761	0.681569	0.668877	0.921542	0.549474	0.945141	0.786764	0.4857	1.05473	0.663162	1.2582	0.681625	0.435865	0	0.366109	0.629116	19	18	25	60	56	79	43	57	58	37	94	54	103	60	35	0	28	51
gene-GIB67_000860	JACGCM010002325.1	189957	197681	+	GIB67_000860	35701	rna-gnl|WGS:JACGCM|KingUnif31909.1	GO:0005737(cytoplasm)	NA	NA	NA	PREDICTED: uncharacterized protein LOC104610174 [Nelumbo nucifera]	NA	2.41672	3.20583	2.3658	12.0972	5.12057	6.69822	8.31934	5.85094	6.7479	4.05924	4.6933	7.55341	2.46851	1.74351	1.67883	2.64508	3.5252	2.40959	253	372	246	1535	619	837	949	508	714	448	606	886	292	222	196	290	390	285
gene-GIB67_000861	JACGCM010002325.1	200463	202591	+	GIB67_000861	35702	rna-gnl|WGS:JACGCM|KingUnif08695.1	GO:0003674(molecular_function);GO:0005634(nucleus);GO:0005635(nuclear envelope);GO:0005783(endoplasmic reticulum);GO:0008150(biological_process)	NA	NA	NA	PREDICTED: uncharacterized protein slp1-like [Nelumbo nucifera]	NA	25.1445	15.9907	22.645	11.1963	13.5712	13.3534	15.3587	21.0832	19.7423	39.1228	12.5216	20.5092	28.6897	26.8173	26.0121	16.7057	25.5856	25.6179	2351	1659	2104	1270	1465	1491	1566	1636	1866	3855	1445	2149	3032	3049	2706	1635	2526	2704
gene-GIB67_000862	JACGCM010002325.1	104770	105936	+	GIB67_000862	35691	rna-gnl|WGS:JACGCM|KingUnif33094.1	GO:0004842(ubiquitin-protein transferase activity);GO:0019005(SCF ubiquitin ligase complex);GO:0031146(SCF-dependent proteasomal ubiquitin-dependent protein catabolic process)	NA	NA	NA	F-box protein CPR30-like, partial [Durio zibethinus]	NA	3.05845	1.41388	1.91141	1.82184	0.958839	0.617582	1.0887	2.06906	1.84233	3.13401	2.52708	2.04263	7.03332	1.73502	4.52473	1.78308	1.93561	1.47351	197	101	122	142	71	48	77	111	120	212	200	147	510	136	323	120	132	107
gene-GIB67_000863	JACGCM010002325.1	180284	186266	+	GIB67_000863	35700	rna-gnl|WGS:JACGCM|KingUnif40042.1	GO:0003674(molecular_function);GO:0008150(biological_process)	NA	NA	NA	PREDICTED: CCR4-NOT transcription complex subunit 11 isoform X1 [Nelumbo nucifera]	NA	4.91686	5.69617	6.39025	12.9523	14.4527	9.12162	17.0566	15.1081	10.7023	6.79412	18.5041	16.9483	12.4336	7.56259	18.9812	13.9907	16.1699	3.7927	493	634	637	1576	1673	1092	1865	1257	1085	718	2290	1905	1409	922	2117	1469	1712	430
gene-GIB67_000864	JACGCM010002325.1	113078	117531	+	GIB67_000864	35692	rna-gnl|WGS:JACGCM|KingUnif20888.1	GO:0005794(Golgi apparatus);GO:0008150(biological_process);GO:0016021(integral component of membrane);GO:0016787(hydrolase activity)	NA	NA	NA	PREDICTED: uncharacterized protein LOC104605719 isoform X2 [Nelumbo nucifera]	NA	4.32652	3.91992	4.54425	4.3225	5.95376	4.44381	3.89642	5.86391	4.55718	3.24076	1.85295	1.59692	4.1432	4.64864	2.75211	2.33487	2.67312	0.816988	336	338	350	407	533	412	330	378	358	265	178	139	363	439	238	190	219	72
gene-GIB67_000865	JACGCM010002325.1	121736	134699	+	GIB67_000865	35693	rna-gnl|WGS:JACGCM|KingUnif31406.1	GO:0009501(amyloplast);GO:0009507(chloroplast);GO:0009509(chromoplast);GO:0009513(etioplast);GO:0009537(proplastid);GO:0009658(chloroplast organization);GO:0009965(leaf morphogenesis);GO:0071482(cellular response to light stimulus)	NA	NA	NA	hypothetical protein AQUCO_02600014v1 [Aquilegia coerulea]	NA	6.57247	5.47259	8.97104	3.72147	5.76353	4.8156	18.7893	15.322	18.2166	4.76093	5.65059	6.02168	5.64617	2.30899	8.32053	6.47262	6.37639	3.9777	1026	948	1391	705	1039	898	3198	1985	2874	783	1089	1054	996	439	1445	1058	1051	701
gene-GIB67_000866	JACGCM010002325.1	233097	240079	+	GIB67_000866	35705	rna-gnl|WGS:JACGCM|KingUnif25166.1	GO:0004601(peroxidase activity);GO:0009505(plant-type cell wall);GO:0009664(plant-type cell wall organization)	00940(Phenylpropanoid biosynthesis)	K00430	EC:1.11.1.7	hypothetical protein DVH24_002747 [Malus domestica]	NA	1.84123	1.54005	1.63539	5.71582	5.13873	5.37209	3.30241	1.2771	1.18423	15.7947	6.87266	3.95458	23.4186	60.6624	98.4107	272.642	285.037	86.6316	212	197	187	797	682	737	414	122	138	1913	975	510	3042	8476	12582	32798	34587	11238
gene-GIB67_000867	JACGCM010002325.1	85645	94816	+	GIB67_000867	35689	rna-gnl|WGS:JACGCM|KingUnif34975.1	GO:0003677(DNA binding)	NA	NA	NA	Plant transcription factor [Macleaya cordata]	NA	13.0342	9.57634	17.2239	11.5376	17.9926	12.0875	18.2475	14.4486	18.783	18.5204	30.7444	22.2223	62.002	18.2562	87.6567	36.4917	26.5856	30.1601	723	589	949	776	1152	800	1103	665	1053	1082	2103	1381	3884	1231	5405	2118	1556	1887
gene-GIB67_000868	JACGCM010002325.1	256980	258465	+	GIB67_000868	35706	rna-gnl|WGS:JACGCM|KingUnif26974.1	NA	NA	NA	NA	uncharacterized protein LOC113774055 [Coffea eugenioides]	NA	0	0	0	0	0	0	0	0	0	0	0	0.022687	0	0	0	0	0	0	0	0	0	0	0	0	0	0	0	0	0	2	0	0	0	0	0	0
gene-GIB67_000869	JACGCM010002325.1	159051	167611	+	GIB67_000869	35697	rna-gnl|WGS:JACGCM|KingUnif08104.1	GO:0003674(molecular_function);GO:0008150(biological_process);GO:0009507(chloroplast);GO:0016021(integral component of membrane)	NA	NA	NA	zinc finger protein [Macleaya cordata]	NA	0.888031	1.17446	0.558927	1.66213	1.53196	1.48881	1.62663	2.19742	2.13503	1.68402	1.77285	1.07218	2.60091	1.15769	1.58286	1.61382	2.11535	1.27039	143	209	89	323	283	285	284	292	346	284	351	193	471	226	282	271	358	230
gene-GIB67_000870	JACGCM010002325.1	95577	103438	+	GIB67_000870	35690	rna-gnl|WGS:JACGCM|KingUnif06569.1	GO:0004842(ubiquitin-protein transferase activity);GO:0019005(SCF ubiquitin ligase complex);GO:0031146(SCF-dependent proteasomal ubiquitin-dependent protein catabolic process)	NA	NA	NA	F-box/kelch-repeat protein At3g06240-like [Papaver somniferum]	NA	0.115739	0.112576	0.038503	0.379131	0.257655	0.21703	0.283812	0.258303	0.250818	0.295463	0.521396	0.114715	0.915101	0.089454	0.599518	0.663565	0.547196	0.352341	11	12	4	43	28	24	29	20	24	29	60	12	96	11	62	65	54	37
gene-GIB67_000871	JACGCM010002325.1	169910	170932	-	GIB67_000871	35698	rna-gnl|WGS:JACGCM|KingUnif04835.1	GO:0005634(nucleus);GO:0009056(catabolic process);GO:0009860(pollen tube growth);GO:0052689(carboxylic ester hydrolase activity)	NA	NA	NA	hypothetical protein AQUCO_01400051v1 [Aquilegia coerulea]	NA	1.05081	0.615306	1.54521	2.93794	0.977047	0.947899	11.3164	8.51312	5.26501	2.36227	0.218618	0.562294	4.86792	0.986305	16.5843	1.34502	1.91247	2.12969	60	39	87	201	64	64	694	397	300	140	16	36	310	68	1037	80	114	136
gene-GIB67_000872	JACGCM010002325.1	171857	179199	-	GIB67_000872	35699	rna-gnl|WGS:JACGCM|KingUnif10946.1	GO:0004150(dihydroneopterin aldolase activity);GO:0005829(cytosol);GO:0006760(folic acid-containing compound metabolic process);GO:0009507(chloroplast);GO:0046654(tetrahydrofolate biosynthetic process);GO:0046656(folic acid biosynthetic process);GO:0102083(7,8-dihydromonapterin aldolase activity)	00790(Folate biosynthesis)	K01633	EC:4.1.2.25;EC:5.1.99.8	dihydroneopterin aldolase 2-like [Hevea brasiliensis]	NA	85.8637	67.2908	62.2947	45.9307	53.59	40.2023	67.591	77.0162	85.5191	66.2203	63.2603	46.7448	61.4151	38.6599	36.9763	63.4778	53.4233	44.661	3680	3199	2652	2388	2651	2057	3159	2739	3704	2991	3345	2245	2974	2014	1763	2848	2417	2161
gene-GIB67_000873	JACGCM010002325.1	134750	143344	-	GIB67_000873	35694	rna-gnl|WGS:JACGCM|KingUnif18222.1	GO:0005634(nucleus);GO:0005886(plasma membrane);GO:0016757(transferase activity, transferring glycosyl groups);GO:0046524(sucrose-phosphate synthase activity)	00500(Starch and sucrose metabolism)	K00696	EC:2.4.1.14	sucrose-phosphate synthase 1 [Vitis vinifera]	NA	56.2726	37.0878	34.874	285.021	172.296	171.57	34.6118	56.8779	79.8767	42.6838	249.63	137.18	0.68873	1.35835	1.58348	1.86357	8.64729	2.14078	12063	8820	7426	74116	42627	43900	8091	10117	17307	9642	66028	32954	167	354	378	419	1958	518
gene-GIB67_000874	JACGCM010002325.1	283969	286062	-	GIB67_000874	35710	rna-gnl|WGS:JACGCM|KingUnif38282.1	GO:0005215(transporter activity);GO:0005886(plasma membrane);GO:0006857(oligopeptide transport);GO:0015706(nitrate transport);GO:0016020(membrane);GO:0016021(integral component of membrane);GO:0022857(transmembrane transporter activity);GO:0042938(dipeptide transport);GO:0055085(transmembrane transport)	NA	NA	NA	PREDICTED: protein NRT1/ PTR FAMILY 5.10-like [Erythranthe guttata]	NA	0	0	0	0.304143	0.427381	0.330197	0.038323	0	0	0.044897	0.1453	0.129287	0.058828	0.090736	0.018688	0.019289	0.039378	0	0	0	0	24	32	25	3	0	0	3	12	10	5	7	2	2	3	0
gene-GIB67_000875	JACGCM010002325.1	144497	154036	-	GIB67_000875	35695	rna-gnl|WGS:JACGCM|KingUnif23032.1	GO:0000398(mRNA splicing, via spliceosome);GO:0003677(DNA binding);GO:0003723(RNA binding);GO:0005634(nucleus);GO:0046872(metal ion binding);GO:0089701(U2AF)	NA	NA	NA	RNA recognition motif domain [Macleaya cordata]	NA	8.47354	9.63105	6.28916	11.1432	9.83704	8.19192	11.0905	9.4488	12.5916	7.8375	8.09981	7.07164	8.55856	5.86476	7.81277	6.94272	12.6929	6.2065	1066	1345	786	1701	1429	1231	1522	987	1602	1039	1258	997	1217	897	1094	915	1686	882
gene-GIB67_000876	JACGCM010002325.1	203761	218251	-	GIB67_000876	35703	rna-gnl|WGS:JACGCM|KingUnif03787.1	GO:0000139(Golgi membrane);GO:0000266(mitochondrial fission);GO:0003924(GTPase activity);GO:0005525(GTP binding);GO:0005737(cytoplasm);GO:0005774(vacuolar membrane);GO:0005794(Golgi apparatus);GO:0005829(cytosol);GO:0005874(microtubule);GO:0005886(plasma membrane);GO:0006896(Golgi to vacuole transport);GO:0008017(microtubule binding);GO:0008289(lipid binding);GO:0009506(plasmodesma);GO:0009524(ph…	04144(Endocytosis)	K01528	EC:3.6.5.5	PREDICTED: dynamin-2A isoform X1 [Elaeis guineensis]	NA	2.02605	1.77965	1.54013	3.00333	2.80533	3.92743	2.33174	2.11887	2.37784	2.67448	4.42762	5.15437	6.11381	2.79039	10.0659	2.86001	2.9694	3.61669	385	375	291	692	615	890	483	334	456	535	1037	1096	1311	644	2125	568	595	775
gene-GIB67_000877	JACGCM010002325.1	261236	263993	-	GIB67_000877	35707	rna-gnl|WGS:JACGCM|KingUnif39974.1	GO:0008878(glucose-1-phosphate adenylyltransferase activity)	00500(Starch and sucrose metabolism);00520(Amino sugar and nucleotide sugar metabolism)	K00975	EC:2.7.7.27	glucose-1-phosphate adenylyltransferase large subunit 1 isoform X3 [Citrus clementina]	NA	0	0	0	0.250952	0	0	0	0	0	0.256844	0	0.164479	0	0	0	0	0	0	0	0	0	10	0	0	0	0	0	9	0	6	0	0	0	0	0	0
gene-GIB67_000878	JACGCM010002325.1	277347	281892	-	GIB67_000878	35709	rna-gnl|WGS:JACGCM|KingUnif04291.1	GO:0004497(monooxygenase activity);GO:0007275(multicellular organism development);GO:0010268(brassinosteroid homeostasis);GO:0016125(sterol metabolic process);GO:0016132(brassinosteroid biosynthetic process)	NA	NA	NA	hypothetical protein AQUCO_07700033v1 [Aquilegia coerulea]	NA	0	0	0	0	0	0.008867	0	0	0	0	0	0	0	0.306304	0	0	4.89609	0.051215	0	0	0	0	0	2	0	0	0	0	0	0	0	37	0	0	513	6
gene-GIB67_000879	JACGCM010002325.1	270981	273386	-	GIB67_000879	35708	rna-gnl|WGS:JACGCM|KingUnif10753.1	GO:0004497(monooxygenase activity);GO:0007275(multicellular organism development);GO:0010268(brassinosteroid homeostasis);GO:0016125(sterol metabolic process);GO:0016132(brassinosteroid biosynthetic process)	NA	NA	NA	hypothetical protein AQUCO_07700033v1 [Aquilegia coerulea]	NA	0.075516	0.012919	0	0.276076	0.245931	0.191192	0.54196	1.44776	0.783135	0.038545	0.128874	1.19884	0.130562	0.074831	0.079201	0.013354	0.088571	0.225579	8	2	0	32	27	22	56	114	75	4	16	127	14	9	9	2	9	25
gene-GIB67_000880	JACGCM010002325.1	220154	221269	-	GIB67_000880	35704	rna-gnl|WGS:JACGCM|KingUnif01361.1	GO:0000139(Golgi membrane);GO:0000266(mitochondrial fission);GO:0003924(GTPase activity);GO:0005525(GTP binding);GO:0005737(cytoplasm);GO:0005774(vacuolar membrane);GO:0005794(Golgi apparatus);GO:0005829(cytosol);GO:0005874(microtubule);GO:0005886(plasma membrane);GO:0006896(Golgi to vacuole transport);GO:0008017(microtubule binding);GO:0008289(lipid binding);GO:0009506(plasmodesma);GO:0009524(ph…	04144(Endocytosis)	K01528	EC:3.6.5.5	Dynamin central domain [Macleaya cordata]	NA	0.923221	1.32461	1.0968	2.09514	3.80721	5.72222	1.15846	0.726062	1.55207	1.54354	3.01659	3.09401	2.42659	1.75968	5.94925	1.83662	1.38836	2.35275	25	39	29	67	116	180	34	16	42	43	98	92	73	57	175	51	39	70
gene-GIB67_000881	JACGCM010002479.1	19173	20513	-	GIB67_000881	37700	rna-gnl|WGS:JACGCM|KingUnif15467.1	GO:0000981(RNA polymerase II transcription factor activity, sequence-specific DNA binding);GO:0001135(transcription factor activity, RNA polymerase II transcription factor recruiting);GO:0003677(DNA binding);GO:0003700(DNA binding transcription factor activity);GO:0005515(protein binding);GO:0005634(nucleus);GO:0006351(transcription, DNA-templated);GO:0006355(regulation of transcription, DNA-temp…	NA	NA	NA	Myb_DNA-binding domain-containing protein [Cephalotus follicularis]	NA	0.140798	0.066994	2.16165	1.42456	0.489504	0.528651	1.73735	3.541	1.71751	0.020732	0.102331	0.048128	0.539608	0	0.344564	0.020471	0.149586	0	9	5	137	111	37	41	121	188	111	2	9	4	39	0	25	2	11	0
gene-GIB67_000882	JACGCM010002479.1	21449	28070	-	GIB67_000882	37701	rna-gnl|WGS:JACGCM|KingUnif31730.1	GO:0001056(RNA polymerase III activity);GO:0005666(DNA-directed RNA polymerase III complex)	00230(Purine metabolism);00240(Pyrimidine metabolism);03020(RNA polymerase)	K03026	NA	hypothetical protein AQUCO_01300797v1 [Aquilegia coerulea]	NA	9.11256	8.69099	6.29144	4.12239	4.54738	4.63595	10.4536	9.80967	11.9095	5.39849	3.72555	3.40656	8.32798	2.29137	5.2493	7.78313	8.69098	6.47052	724	766	497	398	417	440	906	647	957	452	366	304	748	222	464	648	729	581
gene-GIB67_000885	JACGCM010002250.1	2942	7240	+	GIB67_000885	34584	rna-gnl|WGS:JACGCM|KingUnif29159.1	GO:0004970(ionotropic glutamate receptor activity);GO:0005217(intracellular ligand-gated ion channel activity);GO:0005515(protein binding);GO:0005634(nucleus);GO:0006811(ion transport);GO:0006874(cellular calcium ion homeostasis);GO:0009416(response to light stimulus);GO:0016021(integral component of membrane)	NA	NA	NA	hypothetical protein AQUCO_06800019v1, partial [Aquilegia coerulea]	NA	0.32093	0.222333	0.339329	3.78352	9.99968	7.69405	2.56548	2.349	1.07635	0.635045	0.163718	1.25682	0.176249	0.471123	0.451139	0.834471	1.49621	0.320888	48	37	50	673	1691	1346	410	286	160	99	30	207	30	84	74	128	232	54
gene-GIB67_000887	JACGCM010001602.1	2381	8335	+	GIB67_000887	24314	rna-gnl|WGS:JACGCM|KingUnif24053.1	GO:0000325(plant-type vacuole);GO:0005215(transporter activity);GO:0005773(vacuole);GO:0005774(vacuolar membrane);GO:0005794(Golgi apparatus);GO:0005886(plasma membrane);GO:0009705(plant-type vacuole membrane);GO:0015031(protein transport);GO:0015112(nitrate transmembrane transporter activity);GO:0015334(high-affinity oligopeptide transmembrane transporter activity);GO:0015833(peptide transport);…	NA	NA	NA	peptide transporter [Hakea actites]	NA	37.4605	34.5969	48.1825	48.175	47.3112	67.3542	35.7198	52.8389	52.4657	19.4403	41.4925	33.7216	12.2543	15.008	7.9075	13.1492	12.5598	15.3399	3956	4053	5054	6171	5766	8489	4113	4630	5600	2163	5406	3991	1463	1927	929	1454	1401	1829
gene-GIB67_000890	JACGCM010001602.1	9604	9789	+	GIB67_000890	24315	rna-gnl|WGS:JACGCM|KingUnif33042.1	NA	NA	NA	NA	glu S.griseus protease inhibitor-like [Papaver somniferum]	NA	0	0	0	0	0	0	0	0	0	0	0	0	0	0	0	0.115938	0	0.971098	0	0	0	0	0	0	0	0	0	0	0	0	0	0	0	2	0	12
gene-GIB67_000891	JACGCM010000449.1	6552	8705	-	GIB67_000891	5226	rna-gnl|WGS:JACGCM|KingUnif15945.1	NA	NA	NA	NA		NA	0.103161	0.101487	0.062479	0.156885	0.332867	0.097539	0.263233	0.358186	0.178571	0.285598	0.054529	0.027181	0.242394	0.116792	0.241527	0.35022	0.087472	0.086285	9	10	6	16	32	10	24	25	15	25	6	3	23	12	23	31	8	8
gene-GIB67_000892	JACGCM010001802.1	171825	172746	+	GIB67_000892	28063	rna-gnl|WGS:JACGCM|KingUnif40643.1	NA	NA	NA	NA		NA	0	0	0	0	0	0	0	0	0	0	0	0	0	0.142057	0	0.189868	0	0	0	0	0	0	0	0	0	0	0	0	0	0	0	8	0	10	0	0
gene-GIB67_000893	JACGCM010001802.1	231152	234466	+	GIB67_000893	28066	rna-gnl|WGS:JACGCM|KingUnif11070.1	GO:0005886(plasma membrane);GO:0008150(biological_process);GO:0015095(magnesium ion transmembrane transporter activity);GO:0015693(magnesium ion transport);GO:0016021(integral component of membrane)	NA	NA	NA	hypothetical protein AQUCO_01400649v1 [Aquilegia coerulea]	NA	4.48263	4.99743	8.05497	11.738	9.46117	9.81058	7.82812	15.8521	10.3013	7.73212	10.0743	11.3923	4.99184	4.7294	5.75208	5.63437	5.75765	8.86401	249	308	445	791	607	651	475	731	579	453	691	710	314	320	356	328	338	556
gene-GIB67_000896	JACGCM010001802.1	156706	161127	-	GIB67_000896	28060	rna-gnl|WGS:JACGCM|KingUnif35555.1	GO:0005886(plasma membrane);GO:0009306(protein secretion);GO:0009526(plastid envelope);GO:0009658(chloroplast organization);GO:0009793(embryo development ending in seed dormancy);GO:0010027(thylakoid membrane organization);GO:0015450(P-P-bond-hydrolysis-driven protein transmembrane transporter activity);GO:0016020(membrane);GO:0072598(protein localization to chloroplast)	NA	NA	NA	SecY/SEC61-alpha family [Macleaya cordata]	NA	2.64858	2.78092	2.14359	5.45763	6.17097	6.13701	2.18917	5.77174	2.06031	2.47592	3.65971	4.2086	4.3085	1.11799	8.32193	1.39656	0.975104	1.90536	77	89	62	191	206	212	69	139	61	76	131	137	141	40	267	43	30	63
gene-GIB67_000897	JACGCM010001802.1	193587	194723	-	GIB67_000897	28065	rna-gnl|WGS:JACGCM|KingUnif43165.1	GO:0005886(plasma membrane);GO:0009306(protein secretion);GO:0009526(plastid envelope);GO:0009658(chloroplast organization);GO:0009793(embryo development ending in seed dormancy);GO:0010027(thylakoid membrane organization);GO:0015450(P-P-bond-hydrolysis-driven protein transmembrane transporter activity);GO:0016020(membrane);GO:0072598(protein localization to chloroplast)	NA	NA	NA	SecY/SEC61-alpha family [Macleaya cordata]	NA	1.79486	1.68397	1.40867	1.6074	1.95982	3.77777	0.851815	1.31279	1.78268	0.978215	2.70402	1.28889	2.27606	0.31482	3.37861	0.451061	1.40407	0.327633	67	70	52	73	85	168	35	41	67	39	124	54	96	15	140	18	56	14
gene-GIB67_000898	JACGCM010001802.1	177984	186457	-	GIB67_000898	28064	rna-gnl|WGS:JACGCM|KingUnif34972.1	GO:0005886(plasma membrane);GO:0009306(protein secretion);GO:0009526(plastid envelope);GO:0009658(chloroplast organization);GO:0009793(embryo development ending in seed dormancy);GO:0010027(thylakoid membrane organization);GO:0015450(P-P-bond-hydrolysis-driven protein transmembrane transporter activity);GO:0016020(membrane);GO:0072598(protein localization to chloroplast)	NA	NA	NA	PREDICTED: preprotein translocase subunit SCY2, chloroplastic [Vitis vinifera]	NA	1.25367	1.02731	1.03571	2.03983	3.16345	3.41724	0.765455	0.833165	1.07834	0.95722	1.83274	1.08693	2.45196	0.339047	2.27854	0.716451	1.14177	0.705023	48	44	40	95	140	156	32	27	42	39	87	47	106	16	97	29	47	31
gene-GIB67_000899	JACGCM010001802.1	168759	169424	+	GIB67_000899	28062	rna-gnl|WGS:JACGCM|KingUnif23284.1	GO:0003674(molecular_function);GO:0005634(nucleus);GO:0008150(biological_process)	NA	NA	NA	hypothetical protein AQUCO_02900100v1 [Aquilegia coerulea]	NA	0	0	0	0	0	0	0	0	0.085812	0	0	0	0	0	0	0	0.186384	0	0	0	0	0	0	0	0	0	4	0	0	0	0	0	0	0	8	0
gene-GIB67_000900	JACGCM010001557.1	51339	60122	+	GIB67_000900	23305	rna-gnl|WGS:JACGCM|KingUnif03333.1	GO:0005737(cytoplasm);GO:0005886(plasma membrane);GO:0008150(biological_process)	NA	NA	NA	PREDICTED: plant UBX domain-containing protein 10-like [Nelumbo nucifera]	NA	22.3718	24.8042	23.8183	54.8888	51.9275	46.3543	37.9233	46.9161	33.6834	28.3408	50.471	46.1881	35.1153	40.0876	39.606	36.2581	41.0016	26.4151	2133	2623	2255	6347	5713	5274	3942	3711	3245	2847	5936	4934	3783	4646	4200	3618	4127	2842
gene-GIB67_000901	JACGCM010001557.1	45742	50522	+	GIB67_000901	23304	rna-gnl|WGS:JACGCM|KingUnif19070.1	GO:0008150(biological_process);GO:0009507(chloroplast);GO:0046872(metal ion binding)	NA	NA	NA	hypothetical protein AQUCO_08200007v1 [Aquilegia coerulea]	NA	7.11059	8.76617	5.01041	8.45465	8.95183	5.79012	7.92782	7.30714	11.8344	5.41871	7.80671	8.46929	8.53079	3.72302	10.2977	8.28899	10.2543	6.23632	616	842	431	888	895	599	749	525	1036	495	834	822	835	392	992	752	938	610
gene-GIB67_000902	JACGCM010001557.1	29906	34186	+	GIB67_000902	23302	rna-gnl|WGS:JACGCM|KingUnif06336.1	GO:0004674(protein serine/threonine kinase activity);GO:0005829(cytosol);GO:0006468(protein phosphorylation);GO:0035556(intracellular signal transduction)	NA	NA	NA	Myc-type [Macleaya cordata]	NA	2.48291	1.17552	1.46454	4.63209	7.64679	7.62174	2.75455	4.7321	5.38553	2.42414	12.5929	11.4807	12.6369	3.52054	27.7087	8.10552	12.078	8.16295	384	202	225	868	1363	1405	464	607	841	395	2400	1987	2206	661	4760	1311	1970	1423
gene-GIB67_000903	JACGCM010001557.1	39501	41769	+	GIB67_000903	23303	rna-gnl|WGS:JACGCM|KingUnif13623.1	GO:0009705(plant-type vacuole membrane);GO:0015140(malate transmembrane transporter activity)	NA	NA	NA	Aluminum-activated malate transporter [Macleaya cordata]	NA	0	0	0	0	0	0	0	0	0	0	0	0	0	0.183174	0	0.166656	4.60953	0.128087	0	0	0	0	0	0	0	0	0	0	0	0	0	19	0	15	396	12
gene-GIB67_000904	JACGCM010001557.1	70987	77826	-	GIB67_000904	23307	rna-gnl|WGS:JACGCM|KingUnif14492.1	GO:0004335(galactokinase activity);GO:0005524(ATP binding);GO:0005737(cytoplasm);GO:0016310(phosphorylation);GO:0042352(GDP-L-fucose salvage);GO:0047341(fucose-1-phosphate guanylyltransferase activity);GO:0050201(fucokinase activity)	00051(Fructose and mannose metabolism);00520(Amino sugar and nucleotide sugar metabolism)	K05305	EC:2.7.1.52	GHMP kinase N-terminal domain [Macleaya cordata]	NA	5.97935	6.15027	5.11608	7.04929	7.11072	6.53296	7.3672	7.65853	10.1492	5.94656	8.46879	6.25702	8.77465	3.42267	9.479	8.86475	6.40313	7.61644	1015	1158	863	1452	1393	1324	1364	1079	1741	1064	1774	1190	1683	707	1790	1575	1148	1459
gene-GIB67_000905	JACGCM010001557.1	67480	67890	-	GIB67_000905	23306	rna-gnl|WGS:JACGCM|KingUnif41565.1	GO:0003674(molecular_function);GO:0005634(nucleus);GO:0008150(biological_process)	03040(Spliceosome);04141(Protein processing in endoplasmic reticulum);04144(Endocytosis)	K03283	NA	LRAT-like domain [Macleaya cordata]	NA	4.46568	1.43411	1.00954	1.32798	0.980852	0.400237	1.17845	1.36073	1.52432	4.24623	5.1601	3.07212	16.726	2.4127	24.4864	19.6638	16.8384	10.0525	101	36	23	37	26	11	30	26	35	102	144	78	427	67	616	465	402	257
gene-GIB67_000906	JACGCM010001557.1	84516	85366	-	GIB67_000906	23308	rna-gnl|WGS:JACGCM|KingUnif34570.1	GO:0004335(galactokinase activity);GO:0005524(ATP binding);GO:0005737(cytoplasm);GO:0016310(phosphorylation);GO:0042352(GDP-L-fucose salvage);GO:0047341(fucose-1-phosphate guanylyltransferase activity);GO:0050201(fucokinase activity)	00051(Fructose and mannose metabolism);00520(Amino sugar and nucleotide sugar metabolism)	K05305	EC:2.7.1.52	GHMP kinase N-terminal domain-containing protein [Cinnamomum micranthum f. kanehirae]	NA	3.01866	2.70042	1.83079	2.96323	1.4496	3.19945	3.7031	3.96361	4.72158	1.52905	4.79321	3.05928	3.53096	0.945292	2.09058	1.73568	1.88172	2.43157	97	96	59	115	54	122	129	105	153	52	189	110	128	37	75	58	64	88
gene-GIB67_000907	JACGCM010001557.1	107938	108312	+	GIB67_000907	23313	rna-gnl|WGS:JACGCM|KingUnif34156.1	GO:0005509(calcium ion binding)	NA	NA	NA	EF-hand domain [Macleaya cordata]	NA	52.4286	20.9501	36.8341	272.721	132.639	138.652	171.063	245.968	249.867	68.4892	46.9647	98.101	2.83841	3.86879	16.1217	253.203	66.4961	36.4328	1081	479	754	6816	3154	3410	3843	4205	5203	1487	1194	2265	67	97	370	5460	1447	848
gene-GIB67_000908	JACGCM010001557.1	160688	164366	+	GIB67_000908	23321	rna-gnl|WGS:JACGCM|KingUnif21100.1	GO:0005887(integral component of plasma membrane);GO:0006857(oligopeptide transport);GO:0015031(protein transport);GO:0016020(membrane);GO:0016021(integral component of membrane);GO:0035673(oligopeptide transmembrane transporter activity);GO:0055085(transmembrane transport)	NA	NA	NA	oligopeptide transporter 7-like [Papaver somniferum]	NA	1.5359	0.232676	4.05317	98.799	60.4963	98.0298	28.4052	19.2704	21.4075	0.928349	5.4005	17.9596	0.706587	0.492729	4.13415	7.58624	7.05105	1.39202	213	36	558	16599	9670	16206	4290	2215	2997	136	923	2788	111	83	637	1100	1032	218
gene-GIB67_000909	JACGCM010001557.1	93849	96930	+	GIB67_000909	23310	rna-gnl|WGS:JACGCM|KingUnif08395.1	GO:0004674(protein serine/threonine kinase activity);GO:0005829(cytosol);GO:0006468(protein phosphorylation);GO:0035556(intracellular signal transduction)	NA	NA	NA	Protein kinase domain [Macleaya cordata]	NA	2.25046	3.78597	1.63698	7.80021	7.07156	5.34523	7.1673	6.99784	6.64903	2.57443	7.53811	5.72382	6.37113	4.6826	10.3695	7.9562	11.4045	4.08817	305	569	221	1282	1106	865	1059	787	911	368	1261	869	976	772	1563	1129	1632	626
gene-GIB67_000910	JACGCM010001557.1	143470	148637	+	GIB67_000910	23319	rna-gnl|WGS:JACGCM|KingUnif02934.1	GO:0000398(mRNA splicing, via spliceosome);GO:0035614(snRNA stem-loop binding)	NA	NA	NA	RNA recognition motif domain [Macleaya cordata]	NA	24.6142	26.3109	18.7859	20.448	31.0852	20.9142	34.2891	32.6456	31.451	22.2219	45.8959	31.1244	69.1874	29.7081	86.2366	45.9672	33.6981	35.5058	1607	1905	1218	1619	2342	1630	2441	1768	2075	1529	3696	2277	5103	2358	6261	3141	2323	2616
gene-GIB67_000911	JACGCM010001557.1	127987	133333	+	GIB67_000911	23316	rna-gnl|WGS:JACGCM|KingUnif13693.1	GO:0005783(endoplasmic reticulum);GO:0005887(integral component of plasma membrane);GO:0019829(cation-transporting ATPase activity)	NA	NA	NA	Cation-transporting P-type ATPase [Macleaya cordata]	NA	24.4885	16.8603	14.4983	38.2993	34.4903	48.2259	19.6028	18.6944	18.6325	19.2408	44.8484	48.6621	10.2778	8.50393	9.72483	4.17076	6.65633	6.50143	4663	3562	2742	8847	7580	10961	4070	2954	3586	3861	10537	10384	2212	1969	2060	832	1339	1398
gene-GIB67_000912	JACGCM010001557.1	140989	142414	+	GIB67_000912	23318	rna-gnl|WGS:JACGCM|KingUnif10379.1	GO:0005783(endoplasmic reticulum);GO:0005887(integral component of plasma membrane);GO:0019829(cation-transporting ATPase activity)	NA	NA	NA	PREDICTED: calcium-transporting ATPase, endoplasmic reticulum-type [Nelumbo nucifera]	NA	0	0	0	0	0	0	0	0	0	0	0	0.056572	0	0	0	0	0	0	0	0	0	0	0	0	0	0	0	0	0	2	0	0	0	0	0	0
gene-GIB67_000913	JACGCM010001557.1	118756	120837	-	GIB67_000913	23315	rna-gnl|WGS:JACGCM|KingUnif22942.1	GO:0005576(extracellular region);GO:0016829(lyase activity)	NA	NA	NA	Rhamnogalacturonate lyase [Macleaya cordata]	NA	0	0	0	0	0	0	0	0	0	0	0	0	0	0.10893	0	0	0	0	0	0	0	0	0	0	0	0	0	0	0	0	0	16	0	0	0	0
gene-GIB67_000914	JACGCM010001557.1	170357	176416	-	GIB67_000914	23322	rna-gnl|WGS:JACGCM|KingUnif13030.1	GO:0005634(nucleus);GO:0005737(cytoplasm)	NA	NA	NA	PREDICTED: U-box domain-containing protein 44-like isoform X1 [Nelumbo nucifera]	NA	5.73475	6.97663	6.58254	37.1098	40.0626	47.551	7.80108	10.006	10.4745	9.72011	53.5384	71.8125	16.7114	24.8691	29.3417	4.77178	8.39013	6.47757	1203	1623	1371	9440	9696	11902	1784	1741	2220	2148	13853	16876	3961	6340	6845	1048	1858	1534
gene-GIB67_000915	JACGCM010001557.1	179070	179745	-	GIB67_000915	23323	rna-gnl|WGS:JACGCM|KingUnif42149.1	GO:0046658(anchored component of plasma membrane)	00230(Purine metabolism);00240(Pyrimidine metabolism);03020(RNA polymerase)	K03006	EC:2.7.7.6	hypothetical protein AQUCO_00800052v1 [Aquilegia coerulea]	NA	2.02724	0.234743	0.484472	0.229946	0	0.210394	0.767067	0.119844	0.636593	0.710979	0.169038	0	5.84578	0.285252	6.50762	2.73461	5.18534	1.71165	65	9	16	9	0	8	27	4	21	24	7	0	210	11	230	91	174	62
gene-GIB67_000916	JACGCM010001557.1	156687	158877	-	GIB67_000916	23320	rna-gnl|WGS:JACGCM|KingUnif07181.1	GO:0003674(molecular_function);GO:0005739(mitochondrion);GO:0008150(biological_process)	NA	NA	NA	Pentatricopeptide repeat [Macleaya cordata]	NA	0.564357	0.417902	0.604064	1.26175	1.53413	1.76843	2.19146	1.8962	1.80707	0.642649	1.83945	1.4193	3.09246	0.606229	4.75846	0.853866	1.2344	0.582042	62	51	65	166	192	229	259	171	198	74	246	172	378	80	573	97	141	72
gene-GIB67_000917	JACGCM010001557.1	109401	115446	-	GIB67_000917	23314	rna-gnl|WGS:JACGCM|KingUnif16619.1	GO:0000398(mRNA splicing, via spliceosome);GO:0003723(RNA binding);GO:0005681(spliceosomal complex);GO:0005737(cytoplasm);GO:0008380(RNA splicing);GO:0016607(nuclear speck)	03040(Spliceosome)	K12893	NA	serine/arginine-rich splicing factor RS31 isoform X2 [Cinnamomum micranthum f. kanehirae]	NA	18.3516	18.9625	18.3757	15.4629	16.5748	12.8704	20.7583	24.1288	22.5833	18.2771	16.859	12.6123	24.1869	11.881	18.8617	21.2755	20.8377	10.6941	1330	1525	1323	1360	1387	1114	1641	1451	1654	1396	1508	1025	1981	1047	1521	1614	1595	875
gene-GIB67_000918	JACGCM010001557.1	91788	92912	-	GIB67_000918	23309	rna-gnl|WGS:JACGCM|KingUnif22791.1	GO:0003677(DNA binding);GO:0003700(DNA binding transcription factor activity);GO:0005634(nucleus);GO:0006351(transcription, DNA-templated);GO:0006355(regulation of transcription, DNA-templated);GO:0007275(multicellular organism development);GO:0009873(ethylene-activated signaling pathway)	NA	NA	NA	PREDICTED: ethylene-responsive transcription factor ERF039 [Nelumbo nucifera]	NA	0	0	0	0	0.106922	0.136279	0	0	0	0.060807	3.73937	4.12785	0	0	1.54668	0.44005	0.724154	0.519319	0	0	0	0	8	11	0	0	0	4	286	286	0	0	107	29	48	37
gene-GIB67_000919	JACGCM010001557.1	136255	137160	-	GIB67_000919	23317	rna-gnl|WGS:JACGCM|KingUnif02372.1	NA	NA	NA	NA		NA	0	0	0	0	0	0	0.063139	0.022599	0.218396	0.0722	0	0	0.201496	0.059055	0.053703	0	0.157309	0	0	0	0	0	0	0	4	1	11	4	0	0	12	4	3	0	9	0
gene-GIB67_000920	JACGCM010001557.1	98892	99870	-	GIB67_000920	23311	rna-gnl|WGS:JACGCM|KingUnif25351.1	GO:0005634(nucleus);GO:0008150(biological_process);GO:0046872(metal ion binding)	NA	NA	NA	PREDICTED: protein yippee-like At4g27745 [Nelumbo nucifera]	NA	58.9354	62.6448	56.7122	110.989	86.0808	84.7624	97.4535	105.706	137.865	82.0936	43.4068	84.0804	29.0097	38.3233	33.232	85.4731	108.012	68.8838	1872	2207	1789	4276	3155	3213	3375	2786	4425	2747	1701	2992	1041	1480	1174	2841	3622	2469
gene-GIB67_000921	JACGCM010001557.1	101223	101522	+	GIB67_000921	23312	rna-gnl|WGS:JACGCM|KingUnif06330.1	GO:0000139(Golgi membrane);GO:0003924(GTPase activity);GO:0005515(protein binding);GO:0005525(GTP binding);GO:0005794(Golgi apparatus);GO:0005795(Golgi stack);GO:0005798(Golgi-associated vesicle);GO:0005802(trans-Golgi network);GO:0005829(cytosol);GO:0005886(plasma membrane);GO:0006886(intracellular protein transport);GO:0009408(response to heat);GO:0048219(inter-Golgi cisterna vesicle-mediated t…	04144(Endocytosis)	K07904	NA	ras-related protein RABA5e isoform X1 [Ziziphus jujuba]	NA	0.739465	0.497382	0	1.73598	0.468251	0.866881	1.79997	0	1.87701	0.529755	0.965789	1.31895	0.701584	0.084515	0.725096	1.19648	0.823715	0.820694	13	10	0	35	9	18	33	0	32	10	20	25	14	2	14	21	15	16
gene-GIB67_000922	JACGCM010001557.1	251609	253144	+	GIB67_000922	23334	rna-gnl|WGS:JACGCM|KingUnif09522.1	GO:0004837(tyrosine decarboxylase activity);GO:0005737(cytoplasm);GO:0006520(cellular amino acid metabolic process);GO:0006559(L-phenylalanine catabolic process);GO:0009611(response to wounding);GO:0016740(transferase activity);GO:0016831(carboxy-lyase activity);GO:0030170(pyridoxal phosphate binding);GO:1990055(phenylacetaldehyde synthase activity)	00350(Tyrosine metabolism);00360(Phenylalanine metabolism);00380(Tryptophan metabolism);00901(Indole alkaloid biosynthesis);00950(Isoquinoline alkaloid biosynthesis);00965(Betalain biosynthesis)	K01593	EC:4.1.1.28;EC:4.1.1.105	PREDICTED: tyrosine/DOPA decarboxylase 2-like [Nelumbo nucifera]	NA	0	0	0.022033	0.003882	0	0.003945	0.09344	0	0	0.084949	0.18963	0.863909	8.54983	5.10377	55.2937	0.011247	1.15558	0.033388	0	0	2	1	0	1	9	0	0	8	20	82	816	524	5191	1	103	4
gene-GIB67_000923	JACGCM010001557.1	240309	245421	+	GIB67_000923	23333	rna-gnl|WGS:JACGCM|KingUnif09565.1	GO:0000014(single-stranded DNA endodeoxyribonuclease activity);GO:0000110(nucleotide-excision repair factor 1 complex);GO:0000710(meiotic mismatch repair);GO:0000724(double-strand break repair via homologous recombination);GO:0003684(damaged DNA binding);GO:0003697(single-stranded DNA binding);GO:0004519(endonuclease activity);GO:0005634(nucleus);GO:0006281(DNA repair);GO:0006284(base-excision re…	03420(Nucleotide excision repair)	K10849	NA	DNA repair protein rad10 [Macleaya cordata]	NA	19.9884	22.2123	15.6239	17.112	13.1082	11.7215	13.7152	14.9829	19.9388	14.9504	14.2919	14.5763	10.8137	3.69688	8.73543	5.67485	7.61565	6.98087	1623	2001	1261	1686	1229	1137	1215	1010	1637	1280	1432	1327	993	365	789	483	653	640
gene-GIB67_000924	JACGCM010001557.1	234350	239878	+	GIB67_000924	23332	rna-gnl|WGS:JACGCM|KingUnif41843.1	GO:0003674(molecular_function);GO:0008150(biological_process);GO:0009507(chloroplast);GO:0016021(integral component of membrane)	NA	NA	NA	hypothetical protein BVC80_883g23 [Macleaya cordata]	NA	2.84855	3.16772	6.54917	1.33469	3.62304	2.90918	1.86824	1.60257	2.73738	0.375473	0.092775	0.796402	1.64812	0.05715	1.97539	0.518548	0.246656	0.069611	326	402	745	186	479	398	234	153	317	46	14	103	214	8	252	63	30	9
gene-GIB67_000927	JACGCM010001557.1	213064	215714	+	GIB67_000927	23328	rna-gnl|WGS:JACGCM|KingUnif37913.1	GO:0005768(endosome);GO:0005774(vacuolar membrane);GO:0005794(Golgi apparatus);GO:0005802(trans-Golgi network);GO:0009507(chloroplast);GO:0015098(molybdate ion transmembrane transporter activity);GO:0015689(molybdate ion transport);GO:0016021(integral component of membrane)	NA	NA	NA	Protein of unknown function DUF791 [Macleaya cordata]	NA	41.3468	27.4404	36.4949	28.272	36.1205	32.4949	19.8024	22.7886	28.4769	32.5071	17.0896	32.0486	23.8807	12.3289	19.3871	17.9177	19.283	21.9409	3162	2328	2772	2623	3188	2967	1652	1447	2202	2620	1613	2747	2064	1147	1650	1435	1557	1894
gene-GIB67_000928	JACGCM010001557.1	206604	208755	+	GIB67_000928	23327	rna-gnl|WGS:JACGCM|KingUnif22439.1	GO:0005768(endosome);GO:0005774(vacuolar membrane);GO:0005794(Golgi apparatus);GO:0005802(trans-Golgi network);GO:0009507(chloroplast);GO:0015098(molybdate ion transmembrane transporter activity);GO:0015689(molybdate ion transport);GO:0016021(integral component of membrane)	NA	NA	NA	hypothetical protein AQUCO_01300033v1 [Aquilegia coerulea]	NA	14.9551	9.74129	18.7655	11.2958	17.7743	19.6589	17.4861	16.7066	14.1678	5.28091	8.34846	10.8301	6.65644	3.02229	5.51432	2.8073	2.38465	7.46415	989	715	1232	906	1356	1551	1261	917	947	368	681	803	498	243	406	195	167	557
gene-GIB67_000929	JACGCM010001557.1	197868	205463	+	GIB67_000929	23325	rna-gnl|WGS:JACGCM|KingUnif20359.1	GO:0005768(endosome);GO:0006886(intracellular protein transport);GO:0030904(retromer complex);GO:0042147(retrograde transport, endosome to Golgi)	04144(Endocytosis)	K18466	NA	Vacuolar protein sorting-associated protein 26 [Macleaya cordata]	NA	42.4688	42.681	39.5513	41.965	39.2126	38.8676	60.3246	76.0341	64.7241	45.1309	41.5383	37.364	38.6392	45.7378	48.6908	65.2035	69.2944	40.6452	3701	4126	3423	4436	3944	4043	5732	5497	5700	4144	4466	3649	3805	4845	4720	5947	6375	3998
gene-GIB67_000930	JACGCM010001557.1	227924	229459	-	GIB67_000930	23331	rna-gnl|WGS:JACGCM|KingUnif12574.1	GO:0005524(ATP binding);GO:0005886(plasma membrane);GO:0016887(ATPase activity)	NA	NA	NA	hypothetical protein AQUCO_03700184v1 [Aquilegia coerulea]	NA	7.90745	4.40514	17.3451	498.712	564.906	538.945	26.8591	41.4601	19.7525	11.7881	411.494	348.545	123.258	135.122	103.313	9.84644	43.9237	15.5181	668	413	1454	51050	55016	54284	2472	2903	1685	1049	42845	32960	11754	13862	9698	870	3914	1478
gene-GIB67_000931	JACGCM010001557.1	187650	188990	-	GIB67_000931	23324	rna-gnl|WGS:JACGCM|KingUnif13821.1	GO:0003674(molecular_function);GO:0005739(mitochondrion);GO:0008150(biological_process)	NA	NA	NA	Pentatricopeptide repeat [Macleaya cordata]	NA	1.83401	1.00177	1.41877	1.80439	1.26552	1.71886	2.0026	3.61711	2.38679	2.07605	1.84671	1.02619	2.35671	0.418935	2.60827	0.925257	1.34462	1.51017	136	82	104	162	108	152	161	222	178	162	168	85	197	38	214	72	105	126
gene-GIB67_000932	JACGCM010001557.1	268979	274649	-	GIB67_000932	23337	rna-gnl|WGS:JACGCM|KingUnif23750.1	GO:0005634(nucleus);GO:0008568(microtubule-severing ATPase activity);GO:0031122(cytoplasmic microtubule organization)	00760(Nicotinate and nicotinamide metabolism)	K00323	EC:1.6.1.2	PREDICTED: ATPase family AAA domain-containing protein 1 [Cucumis sativus]	NA	7.50913	5.78599	6.49894	6.33591	5.59368	3.56568	7.95027	10.0022	11.4661	9.55606	5.83128	5.84556	5.52811	3.65209	5.74057	3.97208	5.72382	6.62939	647	553	556	662	556	367	747	715	998	867	620	564	538	383	550	358	521	645
gene-GIB67_000933	JACGCM010001557.1	216261	220330	-	GIB67_000933	23329	rna-gnl|WGS:JACGCM|KingUnif26571.1	GO:0005789(endoplasmic reticulum membrane);GO:0006487(protein N-linked glycosylation);GO:0006490(oligosaccharide-lipid intermediate biosynthetic process);GO:0042281(dolichyl pyrophosphate Man9GlcNAc2 alpha-1,3-glucosyltransferase activity)	00510(N-Glycan biosynthesis)	K03848	EC:2.4.1.267	Glycosyl transferase [Macleaya cordata]	NA	8.53427	7.48842	6.66863	4.83801	4.34298	4.16926	8.39409	7.979	11.8738	8.64771	5.03844	4.14913	10.8852	5.01037	8.7465	13.8751	12.0123	10.2008	785	764	609	540	461	458	842	609	1104	838	572	428	1131	560	895	1335	1166	1059
gene-GIB67_000934	JACGCM010001557.1	275230	280425	-	GIB67_000934	23338	rna-gnl|WGS:JACGCM|KingUnif23481.1	GO:0003674(molecular_function);GO:0008150(biological_process);GO:0009507(chloroplast);GO:0016021(integral component of membrane)	NA	NA	NA	Replication factor C large subunit like [Actinidia chinensis var. chinensis]	NA	4.81331	5.4184	6.51072	4.48945	5.99694	3.28567	10.5797	8.93667	8.88549	4.75835	9.52884	5.12493	9.29715	2.11419	4.3458	3.53984	5.25299	2.79428	181	226	243	205	261	148	434	279	338	189	442	216	395	97	182	140	209	119
gene-GIB67_000935	JACGCM010001557.1	205921	212000	-	GIB67_000935	23326	rna-gnl|WGS:JACGCM|KingUnif36526.1	GO:0003674(molecular_function);GO:0007568(aging);GO:0009507(chloroplast);GO:0009534(chloroplast thylakoid);GO:0009535(chloroplast thylakoid membrane);GO:0009941(chloroplast envelope)	NA	NA	NA	PREDICTED: rhodanese-like domain-containing protein 14, chloroplastic [Vitis vinifera]	NA	59.9148	30.4509	78.454	52.2745	96.117	73.0034	92.0874	66.9862	77.6535	8.5983	5.1752	16.1386	1.02688	0.543398	1.45482	1.2682	0.378408	1.76569	3061	1726	3982	3240	5668	4452	5131	2840	4010	463	327	925	60	34	83	68	21	102
gene-GIB67_000936	JACGCM010001557.1	220578	223003	-	GIB67_000936	23330	rna-gnl|WGS:JACGCM|KingUnif33644.1	GO:0005744(mitochondrial inner membrane presequence translocase complex);GO:0030150(protein import into mitochondrial matrix);GO:0031305(integral component of mitochondrial inner membrane)	NA	NA	NA	mitochondrial import inner membrane translocase subunit TIM23-1-like [Cynara cardunculus var. scolymus]	NA	76.4448	64.1947	78.3839	54.3187	47.3767	48.5285	89.9716	106.879	101.563	62.2151	37.9687	40.8213	43.6725	51.8227	49.9232	126.192	54.9799	78.8194	3885	3619	3957	3349	2779	2944	4986	4507	5217	3332	2381	2325	2508	3202	2823	6713	2950	4521
gene-GIB67_000937	JACGCM010001557.1	318095	318583	+	GIB67_000937	23343	rna-gnl|WGS:JACGCM|KingUnif14234.1	GO:0005634(nucleus);GO:0005737(cytoplasm);GO:0008150(biological_process)	NA	NA	NA	PREDICTED: uncharacterized protein LOC18605980 [Theobroma cacao]	NA	0	0	0	0	0.247706	0	0.116982	0	0	0.049928	0	0	2.50478	2.34671	2.43348	23.6632	16.3761	24.5071	0	0	0	0	8	0	4	0	0	2	0	0	77	77	73	666	465	744
gene-GIB67_000938	JACGCM010001557.1	319042	332679	+	GIB67_000938	23344	rna-gnl|WGS:JACGCM|KingUnif15546.1	GO:0009793(embryo development ending in seed dormancy);GO:0016787(hydrolase activity);GO:0016788(hydrolase activity, acting on ester bonds);GO:0034338(short-chain carboxylesterase activity)	NA	NA	NA	hypothetical protein BVC80_1719g97 [Macleaya cordata]	NA	41.0044	43.8795	48.3728	35.3751	38.9515	37.5764	53.8393	56.1964	49.7774	14.3912	18.7024	24.718	13.0186	8.98874	16.7631	18.2528	17.5879	16.8635	3147	3736	3688	3294	3451	3443	4506	3579	3862	1164	1772	2126	1130	839	1432	1467	1426	1461
gene-GIB67_000939	JACGCM010001557.1	377907	378251	+	GIB67_000939	23350	rna-gnl|WGS:JACGCM|KingUnif09488.1	GO:0003674(molecular_function);GO:0007275(multicellular organism development);GO:0009733(response to auxin);GO:0009734(auxin-activated signaling pathway);GO:0040008(regulation of growth)	04075(Plant hormone signal transduction)	K14488	NA	PREDICTED: auxin-responsive protein SAUR32 [Nelumbo nucifera]	NA	203.462	108.434	95.7066	93.1776	43.9212	36.9555	60.2398	90.365	66.9202	227.809	411.019	127.783	28.1418	45.7428	40.2893	43.4012	85.2866	27.3292	3857	2280	1802	2143	961	837	1245	1422	1282	4550	9613	2715	603	1054	850	862	1707	585
gene-GIB67_000940	JACGCM010001557.1	352772	358819	+	GIB67_000940	23347	rna-gnl|WGS:JACGCM|KingUnif13676.1	GO:0070847(core mediator complex)	NA	NA	NA	hypothetical protein AQUCO_00600419v1 [Aquilegia coerulea]	NA	23.3923	22.3021	21.1158	29.5851	31.5412	26.2722	32.3894	34.1162	29.6912	24.5701	33.7237	28.3632	22.8585	19.8827	25.99	32.2732	31.5806	26.3191	1519	1607	1362	2331	2364	2037	2294	1839	1949	1682	2703	2064	1678	1570	1878	2194	2166	1929
gene-GIB67_000941	JACGCM010001557.1	283183	286750	+	GIB67_000941	23339	rna-gnl|WGS:JACGCM|KingUnif18110.1	GO:0003006(developmental process involved in reproduction);GO:0005737(cytoplasm);GO:0005886(plasma membrane);GO:0006811(ion transport);GO:0006857(oligopeptide transport);GO:0009624(response to nematode);GO:0010039(response to iron ion);GO:0016021(integral component of membrane);GO:0048316(seed development);GO:0051980(iron-nicotianamine transmembrane transporter activity);GO:0055072(iron ion homeo…	NA	NA	NA	hypothetical protein AQUCO_03700188v1 [Aquilegia coerulea]	NA	1.24409	1.25547	0.381377	8.73928	4.34807	3.70463	1.85979	4.42603	5.47508	4.22913	16.512	2.90893	2.70634	3.86681	4.68171	12.6051	5.93826	11.8166	175	196	54	1487	704	620	285	515	776	625	2857	458	429	660	731	1850	879	1870
gene-GIB67_000942	JACGCM010001557.1	290344	294803	+	GIB67_000942	23340	rna-gnl|WGS:JACGCM|KingUnif18129.1	GO:0003006(developmental process involved in reproduction);GO:0005737(cytoplasm);GO:0005886(plasma membrane);GO:0006811(ion transport);GO:0006857(oligopeptide transport);GO:0009624(response to nematode);GO:0010039(response to iron ion);GO:0016021(integral component of membrane);GO:0048316(seed development);GO:0051980(iron-nicotianamine transmembrane transporter activity);GO:0055072(iron ion homeo…	NA	NA	NA	Oligopeptide transporter [Macleaya cordata]	NA	11.9559	7.26312	19.4792	31.8581	71.0262	34.2665	30.0298	44.5531	31.3198	3.60308	134.225	32.7496	1.09913	4.96231	2.57928	1.99467	1.94331	1.5318	1429	963	2312	4618	9795	4888	3913	4418	3783	454	19790	4386	149	721	343	250	246	207
gene-GIB67_000943	JACGCM010001557.1	306531	307796	+	GIB67_000943	23341	rna-gnl|WGS:JACGCM|KingUnif18948.1	NA	NA	NA	NA	hypothetical protein BVC80_301g5 [Macleaya cordata]	NA	0.68578	1.17184	0	0	0	0	0.410209	0.338954	0	0.620239	2.41153	0	2.75941	1.46717	7.10638	7.45606	0.380315	6.66102	22	41	0	0	0	0	15	9	0	21	94	0	99	57	249	246	13	237
gene-GIB67_000944	JACGCM010001557.1	370673	372387	+	GIB67_000944	23349	rna-gnl|WGS:JACGCM|KingUnif06531.1	GO:0003674(molecular_function);GO:0005739(mitochondrion);GO:0009733(response to auxin)	04075(Plant hormone signal transduction)	K14488	NA	Auxin-induced protein [Macleaya cordata]	NA	78.9992	37.9256	67.9791	42.4738	27.2279	25.739	26.8899	47.3478	39.1433	71.8535	99.7502	48.1352	11.9372	29.4622	24.1826	23.1242	35.5945	10.6874	2331	1242	1992	1520	928	907	865	1160	1168	2234	3631	1592	398	1057	794	715	1109	356
gene-GIB67_000945	JACGCM010001557.1	338083	339975	-	GIB67_000945	23345	rna-gnl|WGS:JACGCM|KingUnif06928.1	GO:0016020(membrane);GO:0016709(oxidoreductase activity, acting on paired donors, with incorporation or reduction of molecular oxygen, NAD(P)H as one donor, and incorporation of one atom of oxygen);GO:0044550(secondary metabolite biosynthetic process)	NA	NA	NA	Cytochrome P450 [Macleaya cordata]	NA	98.5077	63.4303	152.967	3.2951	13.9421	5.47227	4.2837	19.4102	44.7905	85.413	9.54413	3.37043	23.6459	111.308	30.4246	18.631	12.847	99.7997	9730	6951	15008	395	1590	646	462	1591	4472	8891	1164	374	2640	13367	3343	1927	1340	11127
gene-GIB67_000946	JACGCM010001557.1	308789	316003	-	GIB67_000946	23342	rna-gnl|WGS:JACGCM|KingUnif10991.1	GO:0005096(GTPase activator activity);GO:0005622(intracellular);GO:0006886(intracellular protein transport);GO:0012505(endomembrane system);GO:0017137(Rab GTPase binding);GO:0031338(regulation of vesicle fusion);GO:0090630(activation of GTPase activity)	NA	NA	NA	PREDICTED: small G protein signaling modulator 2 isoform X2 [Vitis vinifera]	NA	27.0017	25.6252	13.8164	24.2985	26.1206	26.9194	20.7697	28.2267	31.4577	17.9508	18.9089	12.4396	13.0832	7.01805	17.4613	16.5003	16.296	18.309	3698	3894	1880	4037	4129	4401	3102	3208	4355	2591	3196	1910	2025	1169	2661	2366	2357	2831
gene-GIB67_000947	JACGCM010001557.1	344450	351999	-	GIB67_000947	23346	rna-gnl|WGS:JACGCM|KingUnif38967.1	GO:0004033(aldo-keto reductase (NADP) activity);GO:0009443(pyridoxal 5'-phosphate salvage);GO:0009507(chloroplast);GO:0042820(vitamin B6 catabolic process);GO:0042821(pyridoxal biosynthetic process);GO:0050236(pyridoxine:NADP 4-dehydrogenase activity);GO:0055114(oxidation-reduction process);GO:0070402(NADPH binding)	00750(Vitamin B6 metabolism)	K05275	EC:1.1.1.65	PREDICTED: pyridoxal reductase, chloroplastic [Nelumbo nucifera]	NA	3.28457	2.16351	2.49308	2.03917	2.1406	1.19303	2.65708	1.70731	2.39995	2.13939	0.917747	0.81692	4.62259	0.853304	2.63678	4.96343	2.73606	4.34173	532	389	401	401	400	231	470	230	393	365	184	149	846	168	475	842	468	794
gene-GIB67_000948	JACGCM010001557.1	357487	358445	-	GIB67_000948	23348	rna-gnl|WGS:JACGCM|KingUnif13362.1	GO:0003700(DNA binding transcription factor activity);GO:0005515(protein binding);GO:0005634(nucleus);GO:0006351(transcription, DNA-templated);GO:0006355(regulation of transcription, DNA-templated);GO:0006970(response to osmotic stress);GO:0007275(multicellular organism development);GO:0009414(response to water deprivation);GO:0009615(response to virus);GO:0009651(response to salt stress);GO:0009…	NA	NA	NA	PREDICTED: homeobox-leucine zipper protein ATHB-12-like isoform X2 [Nelumbo nucifera]	NA	25.1992	24.4017	16.4939	6.02194	7.18021	3.20402	20.869	13.6601	14.7877	10.3888	14.1318	13.8046	1.70001	1.73148	1.6543	1.3938	4.21004	2.57766	885	951	576	257	291	135	799	398	525	385	613	544	68	74	65	52	157	103
gene-GIB67_000949	JACGCM010001557.1	469665	471257	+	GIB67_000949	23359	rna-gnl|WGS:JACGCM|KingUnif41381.1	GO:0000038(very long-chain fatty acid metabolic process);GO:0005783(endoplasmic reticulum);GO:0005789(endoplasmic reticulum membrane);GO:0006633(fatty acid biosynthetic process);GO:0009409(response to cold);GO:0009416(response to light stimulus);GO:0009922(fatty acid elongase activity);GO:0010025(wax biosynthetic process);GO:0016020(membrane);GO:0016021(integral component of membrane);GO:0016746(…	00062(Fatty acid elongation)	K15397	EC:2.3.1.199	FAE1/Type III polyketide synthase-like protein [Macleaya cordata]	NA	0.660338	0	0.363698	0.638026	1.67864	1.50694	0.219231	1.03817	0.299973	0.039473	0	0	30.831	1.01776	30.3312	0.043231	0.560038	0.194646	58	0	32	68	170	158	21	76	27	4	0	0	3050	109	2953	4	52	20
gene-GIB67_000950	JACGCM010001557.1	393116	394513	+	GIB67_000950	23351	rna-gnl|WGS:JACGCM|KingUnif18215.1	GO:0003677(DNA binding);GO:0003700(DNA binding transcription factor activity);GO:0005515(protein binding);GO:0005634(nucleus);GO:0006351(transcription, DNA-templated);GO:0009269(response to desiccation);GO:0009611(response to wounding);GO:0009737(response to abscisic acid);GO:0009738(abscisic acid-activated signaling pathway);GO:0009753(response to jasmonic acid);GO:0009867(jasmonic acid mediated…	04016(MAPK signaling pathway - plant);04075(Plant hormone signal transduction)	K13422	NA	Myc-type [Macleaya cordata]	NA	2.1839	1.18754	3.33151	8.61591	13.7128	15.6697	10.6769	9.83079	4.27149	3.17929	50.1402	71.8281	23.1969	6.35612	25.4795	3.18987	2.97619	0.337617	168	102	255	803	1216	1437	895	627	332	258	4752	6183	2014	594	2177	257	242	30
gene-GIB67_000951	JACGCM010001557.1	473886	480261	+	GIB67_000951	23360	rna-gnl|WGS:JACGCM|KingUnif30062.1	GO:0003674(molecular_function);GO:0008150(biological_process);GO:0009507(chloroplast);GO:0016021(integral component of membrane)	NA	NA	NA	PREDICTED: uncharacterized protein LOC104593632 [Nelumbo nucifera]	NA	8.69902	7.21825	5.4946	9.41641	9.55835	8.21564	11.5999	11.621	8.39895	8.93354	15.731	11.2401	20.4335	9.51295	21.1428	19.3207	17.7247	10.1591	289	266	181	379	366	325	420	320	282	312	644	418	765	384	780	670	620	380
gene-GIB67_000952	JACGCM010001557.1	445780	449353	+	GIB67_000952	23356	rna-gnl|WGS:JACGCM|KingUnif06813.1	GO:0016787(hydrolase activity)	NA	NA	NA	PREDICTED: probable lysophospholipase BODYGUARD 2 [Nelumbo nucifera]	NA	1.26992	0.560942	1.42528	0.775993	3.00041	1.71582	30.5323	27.5418	17.8997	0.682527	0	0.135697	7.4762	0.375597	19.1158	0	0	0.093179	124	61	138	92	337	200	3238	2223	1760	70	0	15	822	45	2068	0	0	11
gene-GIB67_000953	JACGCM010001557.1	419314	432767	+	GIB67_000953	23353	rna-gnl|WGS:JACGCM|KingUnif15913.1	GO:0005829(cytosol);GO:0008150(biological_process);GO:0009507(chloroplast)	NA	NA	NA	PREDICTED: uncharacterized protein LOC104604674 isoform X2 [Nelumbo nucifera]	NA	14.7328	17.3665	10.5714	20.6778	24.0509	22.2523	24.4837	27.2722	34.126	10.3287	24.5109	21.8518	28.7448	8.97119	33.9661	13.2265	18.3614	12.1667	2211	2891	1576	3764	4165	3985	4006	3396	5175	1633	4538	3674	4874	1637	5669	2078	2909	2061
gene-GIB67_000954	JACGCM010001557.1	463580	467580	+	GIB67_000954	23358	rna-gnl|WGS:JACGCM|KingUnif09003.1	GO:0004674(protein serine/threonine kinase activity);GO:0005634(nucleus);GO:0005737(cytoplasm);GO:0006468(protein phosphorylation);GO:0035556(intracellular signal transduction)	NA	NA	NA	PREDICTED: CBL-interacting serine/threonine-protein kinase 9 isoform X1 [Nelumbo nucifera]	NA	13.583	14.7564	5.93214	15.6356	38.2984	23.6749	7.5551	8.14412	11.0745	6.88774	0.736344	16.6116	8.83196	4.23909	6.19535	4.85185	0.921391	1.36939	1268	1527	550	1770	4124	2637	769	631	1045	678	85	1737	932	481	643	474	91	145
gene-GIB67_000955	JACGCM010001557.1	412486	415905	+	GIB67_000955	23352	rna-gnl|WGS:JACGCM|KingUnif20727.1	GO:0000077(DNA damage checkpoint);GO:0003684(damaged DNA binding);GO:0006281(DNA repair);GO:0030896(checkpoint clamp complex)	NA	NA	NA	Rad1/Rec1/Rad17 [Macleaya cordata]	NA	0.112528	0	0	0.153368	0	0	0.251828	0.365547	0.472437	0.240582	0.335733	0.217987	2.34009	0	3.62502	0.254283	0	0.546794	6	0	0	10	0	0	14	16	25	13	21	13	134	0	205	14	0	32
gene-GIB67_000956	JACGCM010001557.1	452948	461192	+	GIB67_000956	23357	rna-gnl|WGS:JACGCM|KingUnif29442.1	GO:0005576(extracellular region);GO:0005886(plasma membrane);GO:0016021(integral component of membrane);GO:0019706(protein-cysteine S-palmitoyltransferase activity)	NA	NA	NA	zinc finger protein [Macleaya cordata]	NA	5.81341	5.05618	3.37391	7.97364	8.19109	8.2822	6.60746	7.42927	4.88479	4.3641	6.77999	9.07396	6.23709	4.44217	6.82691	6.84211	2.80404	3.27634	338	326	195	562	549	574	418	358	287	267	486	590	409	314	441	416	172	215
gene-GIB67_000957	JACGCM010001557.1	432833	434241	-	GIB67_000957	23354	rna-gnl|WGS:JACGCM|KingUnif40072.1	GO:0005576(extracellular region);GO:0016042(lipid catabolic process);GO:0016788(hydrolase activity, acting on ester bonds);GO:0052689(carboxylic ester hydrolase activity)	00561(Glycerolipid metabolism)	K00679	EC:2.3.1.158	Lipase [Macleaya cordata]	NA	0	0	0	0	0	0.056452	0.385735	0.338018	0	0	0	0	0	0	0	0	0	0	0	0	0	0	0	5	27	18	0	0	0	0	0	0	0	0	0	0
gene-GIB67_000959	JACGCM010001557.1	514320	516900	+	GIB67_000959	23364	rna-gnl|WGS:JACGCM|KingUnif24642.1	GO:0004842(ubiquitin-protein transferase activity);GO:0019005(SCF ubiquitin ligase complex);GO:0031146(SCF-dependent proteasomal ubiquitin-dependent protein catabolic process)	NA	NA	NA	F-box domain [Macleaya cordata]	NA	4.05169	3.28468	2.84201	3.32278	2.15096	2.53817	4.11974	5.53644	3.35442	3.10858	3.50908	2.70641	3.69289	3.6008	2.21488	4.24031	4.16831	2.44648	362	326	252	360	222	271	401	410	303	293	387	271	373	391	220	396	393	247
gene-GIB67_000960	JACGCM010001557.1	517897	519459	+	GIB67_000960	23365	rna-gnl|WGS:JACGCM|KingUnif03807.1	GO:0016020(membrane);GO:0016709(oxidoreductase activity, acting on paired donors, with incorporation or reduction of molecular oxygen, NAD(P)H as one donor, and incorporation of one atom of oxygen);GO:0044550(secondary metabolite biosynthetic process)	NA	NA	NA	Cytochrome P450 [Macleaya cordata]	NA	0.04729	0.166952	0.018663	0	0	0	0.188887	0.059175	0.093411	0.14417	0.022968	0	0.719109	0.296955	0.597079	0.117355	0.046193	0.361009	4	15	2	0	0	0	17	4	8	13	3	0	66	30	54	10	4	33
gene-GIB67_000961	JACGCM010001557.1	501480	503060	+	GIB67_000961	23363	rna-gnl|WGS:JACGCM|KingUnif37885.1	GO:0003674(molecular_function);GO:0005739(mitochondrion);GO:0008150(biological_process)	NA	NA	NA	hypothetical protein AQUCO_00500266v1 [Aquilegia coerulea]	NA	1.52536	0.761128	0.978357	4.72319	3.64307	4.72633	2.86052	4.70832	3.31746	0.878337	3.14692	4.14947	2.09038	1.75839	3.28006	0.602204	1.53656	1.51853	133	74	85	498	366	490	271	340	292	81	338	404	206	186	317	55	141	149
gene-GIB67_000962	JACGCM010001557.1	560173	561726	-	GIB67_000962	23371	rna-gnl|WGS:JACGCM|KingUnif13980.1	GO:0004672(protein kinase activity);GO:0005524(ATP binding);GO:0005886(plasma membrane);GO:0006468(protein phosphorylation);GO:0016021(integral component of membrane)	NA	NA	NA	Protein kinase domain [Macleaya cordata]	NA	0	0	0	0	0	0	0	0	0	0	0	0	0	0.038284	0	0	0	0	0	0	0	0	0	0	0	0	0	0	0	0	0	4	0	0	0	0
gene-GIB67_000963	JACGCM010001557.1	580074	581486	-	GIB67_000963	23372	rna-gnl|WGS:JACGCM|KingUnif19732.1	GO:0006952(defense response)	NA	NA	NA	hypothetical protein AQUCO_00500189v1 [Aquilegia coerulea]	NA	0.194497	0	0.283849	1.39277	1.06881	0	0.463531	0.58451	0.56111	0.213655	9.49649	5.61349	0.167405	0.714543	0.224795	1.52437	12.8257	0.81378	7	0	10	56	41	0	17	16	19	8	383	206	7	29	9	53	442	30
gene-GIB67_000964	JACGCM010001557.1	492943	498680	-	GIB67_000964	23362	rna-gnl|WGS:JACGCM|KingUnif17842.1	GO:0003674(molecular_function);GO:0008150(biological_process)	NA	NA	NA	hypothetical protein BVC80_1663g59 [Macleaya cordata]	NA	0.455774	0.050272	0.72121	0.155397	0.117396	0.254661	0.492892	0.660967	0.369908	0.524202	0.089596	0.209918	4.43234	0.198511	5.55908	1.6115	0.54158	1.31618	31	4	49	13	10	21	37	38	26	38	8	16	341	17	420	115	39	101
gene-GIB67_000966	JACGCM010001557.1	551244	557683	-	GIB67_000966	23369	rna-gnl|WGS:JACGCM|KingUnif20144.1	GO:0016020(membrane);GO:0016709(oxidoreductase activity, acting on paired donors, with incorporation or reduction of molecular oxygen, NAD(P)H as one donor, and incorporation of one atom of oxygen);GO:0044550(secondary metabolite biosynthetic process)	03018(RNA degradation)	K12589	NA	hypothetical protein C5167_039048 [Papaver somniferum]	NA	7.5693	5.46694	9.82176	4.99309	5.15604	3.6471	97.1305	60.4907	65.4672	8.96157	17.0159	13.8099	16.9818	7.48404	16.7124	8.90358	70.949	36.7795	1297	1039	1671	1038	1019	746	18136	8595	11331	1618	3596	2651	3287	1558	3184	1596	12828	7109
gene-GIB67_000967	JACGCM010001557.1	537998	539617	-	GIB67_000967	23368	rna-gnl|WGS:JACGCM|KingUnif08473.1	GO:0016020(membrane);GO:0016709(oxidoreductase activity, acting on paired donors, with incorporation or reduction of molecular oxygen, NAD(P)H as one donor, and incorporation of one atom of oxygen);GO:0044550(secondary metabolite biosynthetic process)	NA	NA	NA	Cytochrome P450 [Macleaya cordata]	NA	0.094071	0	0.183827	0	0	0.03163	0.245425	0.053912	0.250959	0.589972	0.16083	0.250408	9.45032	15.9874	13.7989	35.4437	28.1198	23.4321	8	0	16	0	0	4	23	4	22	53	17	24	898	1634	1291	3119	2496	2224
gene-GIB67_000968	JACGCM010001557.1	529080	530617	-	GIB67_000968	23367	rna-gnl|WGS:JACGCM|KingUnif19058.1	GO:0016020(membrane);GO:0016709(oxidoreductase activity, acting on paired donors, with incorporation or reduction of molecular oxygen, NAD(P)H as one donor, and incorporation of one atom of oxygen);GO:0044550(secondary metabolite biosynthetic process)	NA	NA	NA	premnaspirodiene oxygenase-like [Papaver somniferum]	NA	0	0.023572	0.019877	0	0	0	0	0	0	0	0	0	0.112898	0.065392	0.089293	0.082573	0.433985	0.105726	0	2	2	0	0	0	0	0	0	0	0	0	10	7	8	7	35	10
gene-GIB67_000969	JACGCM010001557.1	558132	558940	+	GIB67_000969	23370	rna-gnl|WGS:JACGCM|KingUnif04156.1	GO:0004842(ubiquitin-protein transferase activity);GO:0019005(SCF ubiquitin ligase complex);GO:0031146(SCF-dependent proteasomal ubiquitin-dependent protein catabolic process)	NA	NA	NA	PREDICTED: F-box protein CPR30-like [Nelumbo nucifera]	NA	0	0	0	0.24186	0	0	0.046487	0	0	0	0	0	0	0	0.065787	0	0	0	0	0	0	12	0	0	3	0	0	0	0	0	0	0	3	0	0	0
gene-GIB67_000970	JACGCM010001557.1	489349	489786	-	GIB67_000970	23361	rna-gnl|WGS:JACGCM|KingUnif34302.1	GO:0005515(protein binding);GO:0005634(nucleus);GO:0009740(gibberellic acid mediated signaling pathway);GO:0009937(regulation of gibberellic acid mediated signaling pathway);GO:0016567(protein ubiquitination);GO:0019005(SCF ubiquitin ligase complex);GO:0043161(proteasome-mediated ubiquitin-dependent protein catabolic process);GO:0048831(regulation of shoot system development)	04075(Plant hormone signal transduction)	K14495	NA	hypothetical protein AQUCO_00500263v1 [Aquilegia coerulea]	NA	0.082567	0	0	0.401975	0	0.176409	0	0	0	0	4.55235	0	0.609497	0	2.85432	0.219171	2.02531	0.082477	2	0	0	12	0	6	0	0	0	0	136	0	17	0	77	6	52	3
gene-GIB67_000971	JACGCM010001557.1	686368	687549	+	GIB67_000971	23385	rna-gnl|WGS:JACGCM|KingUnif36503.1	GO:0005576(extracellular region);GO:0007275(multicellular organism development);GO:0016020(membrane);GO:0016021(integral component of membrane);GO:0046872(metal ion binding);GO:0055114(oxidation-reduction process)	NA	NA	NA	Cytochrome b561, eukaryote [Corchorus capsularis]	NA	0.061192	0.033503	0.249319	0.403872	3.31237	1.43521	1.18411	1.02276	1.17525	0	0	0	0	0	0	0	0	0	4	3	17	32	249	112	84	56	78	0	0	0	0	0	0	0	0	0
gene-GIB67_000972	JACGCM010001557.1	633627	634938	+	GIB67_000972	23377	rna-gnl|WGS:JACGCM|KingUnif11811.1	GO:0009705(plant-type vacuole membrane)	NA	NA	NA	Two-pore potassium channel like [Actinidia chinensis var. chinensis]	NA	0.239946	0.308408	0.157002	0.792312	0.317151	0.509329	0.046946	0.220805	0.536967	1.282	0.208391	1.14338	6.40989	2.44707	3.95093	0.459032	2.54453	0.46683	17	24	11	65	25	42	4	13	37	92	18	87	489	201	297	33	182	36
gene-GIB67_000973	JACGCM010001557.1	644933	648755	+	GIB67_000973	23379	rna-gnl|WGS:JACGCM|KingUnif00645.1	GO:0005737(cytoplasm);GO:0005874(microtubule);GO:0007010(cytoskeleton organization);GO:0008017(microtubule binding);GO:0009832(plant-type cell wall biogenesis);GO:0010051(xylem and phloem pattern formation);GO:0071555(cell wall organization)	NA	NA	NA	Microtubule-associated protein 70 [Macleaya cordata]	NA	0.1206	0	0.104609	0.222708	0.061346	0.031881	0.125129	0	0.050235	0.262047	0.067338	0.261969	0.186992	0.294808	0.345764	1.1818	0.443205	0.501894	12	0	10	25	7	4	13	0	5	26	8	27	20	33	36	114	43	52
gene-GIB67_000975	JACGCM010001557.1	626113	630287	+	GIB67_000975	23376	rna-gnl|WGS:JACGCM|KingUnif01433.1	GO:0000050(urea cycle);GO:0004088(carbamoyl-phosphate synthase (glutamine-hydrolyzing) activity);GO:0005951(carbamoyl-phosphate synthase complex);GO:0006526(arginine biosynthetic process)	00240(Pyrimidine metabolism);00250(Alanine, aspartate and glutamate metabolism)	K01956	EC:6.3.5.5	Carbamoyl-phosphate synthase [Macleaya cordata]	NA	31.8776	23.0108	20.3548	7.19694	16.6367	11.4561	29.3656	31.7697	32.1342	25.78	29.4378	15.166	48.8077	29.1996	61.1351	35.7606	30.3068	32.3974	2636	2111	1672	722	1588	1131	2648	2180	2686	2246	3004	1406	4561	2935	5623	3095	2646	3024
gene-GIB67_000976	JACGCM010001557.1	677538	680293	+	GIB67_000976	23384	rna-gnl|WGS:JACGCM|KingUnif43100.1	GO:0005737(cytoplasm);GO:0030001(metal ion transport);GO:0046914(transition metal ion binding);GO:0046916(cellular transition metal ion homeostasis)	NA	NA	NA	heavy metal-associated isoprenylated plant protein 7-like [Papaver somniferum]	NA	13.8473	10.2155	16.7588	237.813	243.849	180.794	44.604	29.2864	40.2557	5.24561	118.701	75.297	2.42441	0.127436	2.23036	1.92402	0.611864	0.81454	1235	1011	1485	25722	25094	19242	4337	2167	3628	493	13059	7524	245	14	222	180	58	82
gene-GIB67_000977	JACGCM010001557.1	605408	609251	-	GIB67_000977	23375	rna-gnl|WGS:JACGCM|KingUnif25861.1	GO:0003700(DNA binding transcription factor activity);GO:0005515(protein binding);GO:0005634(nucleus);GO:0006351(transcription, DNA-templated);GO:0006355(regulation of transcription, DNA-templated);GO:0009554(megasporogenesis);GO:0009908(flower development);GO:0030154(cell differentiation);GO:0030163(protein catabolic process);GO:0046622(positive regulation of organ growth)	NA	NA	NA	PREDICTED: transcriptional regulator STERILE APETALA [Nelumbo nucifera]	NA	0	0	0	0	0	0	0	0	0	0	0	0	0.048819	0	0.178907	0	0.037348	0	0	0	0	0	0	0	0	0	0	0	0	0	4	0	15	0	3	0
gene-GIB67_000978	JACGCM010001557.1	647841	653320	-	GIB67_000978	23380	rna-gnl|WGS:JACGCM|KingUnif29610.1	GO:0005634(nucleus)	04712(Circadian rhythm - plant)	K12120	NA	hypothetical protein CCACVL1_25575 [Corchorus capsularis]	NA	6.16342	6.23662	9.76704	35.7028	52.5081	51.0981	20.5509	27.6539	35.4529	4.40269	35.9722	15.688	7.42044	11.4688	18.9983	22.7779	17.1247	12.6468	1265	1420	1990	8885	12432	12512	4597	4707	7351	952	9106	3607	1721	2861	4336	4891	3709	2929
gene-GIB67_000979	JACGCM010001557.1	657535	658830	-	GIB67_000979	23381	rna-gnl|WGS:JACGCM|KingUnif42135.1	GO:0000139(Golgi membrane);GO:0005794(Golgi apparatus);GO:0005795(Golgi stack);GO:0006486(protein glycosylation);GO:0008375(acetylglucosaminyltransferase activity);GO:0008455(alpha-1,6-mannosylglycoprotein 2-beta-N-acetylglucosaminyltransferase activity);GO:0009312(oligosaccharide biosynthetic process);GO:0016021(integral component of membrane)	00510(N-Glycan biosynthesis)	K00736	EC:2.4.1.143	N-acetylglucosaminyltransferase II [Macleaya cordata]	NA	4.31583	2.10349	5.72203	20.2644	21.8649	19.5874	8.94049	9.26027	7.26502	7.81979	25.7277	19.0333	16.2523	21.2199	11.1977	9.03781	13.2325	14.1937	308	167	405	1751	1797	1665	695	548	523	587	2261	1519	1308	1837	887	674	995	1141
gene-GIB67_000980	JACGCM010001557.1	662003	663447	-	GIB67_000980	23382	rna-gnl|WGS:JACGCM|KingUnif02936.1	GO:0005737(cytoplasm);GO:0030001(metal ion transport);GO:0046914(transition metal ion binding);GO:0046916(cellular transition metal ion homeostasis)	NA	NA	NA	hypothetical protein AQUCO_00500373v1 [Aquilegia coerulea]	NA	21.0387	14.444	33.7566	47.4834	46.5986	44.5911	35.5236	26.8152	44.9842	28.3139	41.2123	61.7267	14.2011	30.1052	8.19154	6.93022	8.91476	4.55904	1162	885	1852	3181	2970	2939	2139	1229	2511	1648	2808	3820	887	2021	504	401	520	285
gene-GIB67_000981	JACGCM010001557.1	670217	671222	-	GIB67_000981	23383	rna-gnl|WGS:JACGCM|KingUnif12788.1	NA	NA	NA	NA	hypothetical protein BVC80_1663g33 [Macleaya cordata]	NA	33.2011	18.6092	24.5494	11.0581	11.7896	7.10232	34.6663	44.9483	45.7576	38.0655	28.2119	25.2054	0.077571	0	0.118907	1.68691	0.9062	1.63483	1419	883	1043	574	582	363	1616	1595	1977	1715	1488	1208	4	0	6	76	41	79
gene-GIB67_000982	JACGCM010001557.1	589302	592484	-	GIB67_000982	23373	rna-gnl|WGS:JACGCM|KingUnif31616.1	GO:0003674(molecular_function);GO:0005829(cytosol);GO:0006511(ubiquitin-dependent protein catabolic process);GO:0009507(chloroplast)	04141(Protein processing in endoplasmic reticulum)	K14016	NA	hypothetical protein AQUCO_00700365v1 [Aquilegia coerulea]	NA	31.8453	38.2568	22.0877	33.926	24.652	24.2145	25.6395	24.9119	34.1931	24.1344	21.9036	21.4018	20.6523	14.4052	16.4539	25.8043	29.5984	18.9513	1101	1467	759	1423	984	999	967	715	1195	879	934	829	807	606	633	934	1080	740
gene-GIB67_000983	JACGCM010001557.1	641300	641587	-	GIB67_000983	23378	rna-gnl|WGS:JACGCM|KingUnif27306.1	GO:0003674(molecular_function);GO:0008150(biological_process);GO:0016021(integral component of membrane)	NA	NA	NA	PREDICTED: uncharacterized protein LOC103946260 [Pyrus x bretschneideri]	NA	7.29824	5.87086	5.6864	13.5293	4.11822	3.71297	11.2475	17.4241	10.6908	11.8403	72.038	19.2693	8.84437	4.65761	11.8577	17.8142	13.2345	11.3667	116	104	90	260	76	71	195	229	171	198	1407	342	159	90	209	296	222	203
gene-GIB67_000984	JACGCM010001557.1	718399	719106	+	GIB67_000984	23389	rna-gnl|WGS:JACGCM|KingUnif39428.1	GO:0003674(molecular_function);GO:0008150(biological_process);GO:0009507(chloroplast)	NA	NA	NA	hypothetical protein AQUCO_00500366v1 [Aquilegia coerulea]	NA	0.453201	0.51978	0.059709	0.325544	0.182075	0	0.42442	0.557322	0.932367	1.06348	4.66881	0.380538	3.25917	0.544221	8.13688	5.21787	4.4504	1.77126	18	23	3	16	9	0	19	18	37	44	225	17	144	26	353	213	183	78
gene-GIB67_000985	JACGCM010001557.1	733522	734800	+	GIB67_000985	23391	rna-gnl|WGS:JACGCM|KingUnif34841.1	GO:0003700(DNA binding transcription factor activity);GO:0003712(transcription cofactor activity);GO:0005515(protein binding);GO:0005634(nucleus);GO:0006351(transcription, DNA-templated);GO:0006355(regulation of transcription, DNA-templated);GO:0043565(sequence-specific DNA binding);GO:0046982(protein heterodimerization activity);GO:0048574(long-day photoperiodism, flowering)	NA	NA	NA	PREDICTED: nuclear transcription factor Y subunit B-3 [Vitis vinifera]	NA	4.07022	2.30338	1.24758	1.53646	3.72229	1.148	3.06535	3.41682	5.69489	4.50688	44.6742	1.63804	3.53753	1.50229	7.35688	4.71363	4.10663	4.95763	233	147	71	107	246	79	192	163	330	272	3156	106	229	105	469	283	249	321
gene-GIB67_000986	JACGCM010001557.1	722977	732221	+	GIB67_000986	23390	rna-gnl|WGS:JACGCM|KingUnif09757.1	GO:0005634(nucleus);GO:0005739(mitochondrion);GO:0005829(cytosol)	NA	NA	NA	hypothetical protein AQUCO_00500365v1 [Aquilegia coerulea]	NA	24.1738	22.315	20.2221	44.5757	45.6435	49.5021	28.3047	28.446	31.9786	30.4771	53.5413	43.1695	27.9713	21.4488	34.3356	22.0788	28.5171	21.1002	4455	4562	3701	9964	9707	10888	5687	4350	5956	5918	12173	8914	5825	4805	7038	4259	5548	4389
gene-GIB67_000987	JACGCM010001557.1	690510	694902	+	GIB67_000987	23386	rna-gnl|WGS:JACGCM|KingUnif14337.1	GO:0005737(cytoplasm);GO:0005886(plasma membrane);GO:0005887(integral component of plasma membrane);GO:0006857(oligopeptide transport);GO:0015031(protein transport);GO:0016020(membrane);GO:0035673(oligopeptide transmembrane transporter activity)	NA	NA	NA	Oligopeptide transporter [Macleaya cordata]	NA	22.2072	15.685	32.8613	35.3972	74.0916	40.0015	46.2275	56.0402	67.6111	23.9122	321.747	126.813	17.2963	6.68778	15.4757	2.23049	5.61832	1.78002	3993	3129	5869	7721	15376	8586	9064	8361	12288	4531	71384	25553	3515	1462	3096	420	1067	362
gene-GIB67_000988	JACGCM010001557.1	709424	712629	+	GIB67_000988	23388	rna-gnl|WGS:JACGCM|KingUnif12161.1	GO:0000035(acyl binding);GO:0000036(acyl carrier activity);GO:0005739(mitochondrion);GO:0005829(cytosol);GO:0006633(fatty acid biosynthetic process);GO:0009245(lipid A biosynthetic process);GO:0031177(phosphopantetheine binding);GO:0055114(oxidation-reduction process);GO:0070469(respiratory chain)	00190(Oxidative phosphorylation)	K03955	NA	hypothetical protein Csa_1G181370 [Cucumis sativus]	NA	4.01931	3.1373	1.98388	2.49806	3.00564	2.68043	5.08357	6.68658	4.21054	4.92348	4.60833	3.56318	15.2175	6.48254	13.3069	12.7827	10.414	8.4616	209	181	103	157	180	166	288	288	221	269	295	207	891	409	767	694	570	495
gene-GIB67_000989	JACGCM010001557.1	763141	773132	+	GIB67_000989	23395	rna-gnl|WGS:JACGCM|KingUnif33520.1	GO:0000272(polysaccharide catabolic process);GO:0005983(starch catabolic process);GO:0009507(chloroplast);GO:0016161(beta-amylase activity);GO:0102229(amylopectin maltohydrolase activity)	00500(Starch and sucrose metabolism)	K01177	EC:3.2.1.2	hypothetical protein AQUCO_00500321v1 [Aquilegia coerulea]	NA	7.76576	10.3945	7.80342	18.1311	13.6852	17.1737	10.9375	10.0677	9.72563	7.39203	10.1643	15.3252	11.3447	7.62911	8.37677	3.48028	6.70377	4.88335	788	1170	787	2231	1602	2079	1210	848	997	790	1272	1742	1301	941	945	370	718	559
gene-GIB67_000990	JACGCM010001557.1	774284	774944	+	GIB67_000990	23397	rna-gnl|WGS:JACGCM|KingUnif17937.1	GO:0016020(membrane);GO:0016709(oxidoreductase activity, acting on paired donors, with incorporation or reduction of molecular oxygen, NAD(P)H as one donor, and incorporation of one atom of oxygen);GO:0044550(secondary metabolite biosynthetic process)	NA	NA	NA	cytochrome P450 71D8-like [Papaver somniferum]	NA	0.662247	0.681932	0.664215	1.2001	0.955348	0.617688	2.52569	2.49028	2.44462	0.38863	0.776316	0.110893	0.405924	0.304265	0.237302	1.59803	1.10592	1.3238	22	25	22	47	36	24	89	67	79	14	31	4	15	12	9	54	38	48
gene-GIB67_000991	JACGCM010001557.1	776718	777176	+	GIB67_000991	23398	rna-gnl|WGS:JACGCM|KingUnif39967.1	GO:0016020(membrane);GO:0016709(oxidoreductase activity, acting on paired donors, with incorporation or reduction of molecular oxygen, NAD(P)H as one donor, and incorporation of one atom of oxygen);GO:0044550(secondary metabolite biosynthetic process)	NA	NA	NA	Cytochrome P450 [Macleaya cordata]	NA	0	0	0	0.176536	0	0	0	0.129363	0	0.029105	0	0	0.101068	0	0.136899	0.511239	0.404158	0.542023	0	0	0	6	0	0	0	3	0	1	0	0	3	0	4	14	11	16
gene-GIB67_000992	JACGCM010001557.1	695384	701117	-	GIB67_000992	23387	rna-gnl|WGS:JACGCM|KingUnif37734.1	GO:0004679(AMP-activated protein kinase activity);GO:0005515(protein binding);GO:0005524(ATP binding);GO:0005737(cytoplasm);GO:0005975(carbohydrate metabolic process);GO:0006633(fatty acid biosynthetic process);GO:0016301(kinase activity);GO:0016310(phosphorylation);GO:0019887(protein kinase regulator activity);GO:0042128(nitrate assimilation);GO:0043562(cellular response to nitrogen levels)	NA	NA	NA	PREDICTED: SNF1-related protein kinase regulatory subunit beta-2 [Vitis vinifera]	NA	12.0272	4.84004	11.2861	44.9061	29.9183	34.6631	17.6629	26.5136	21.1849	19.4981	26.3569	23.2001	7.33331	1.79394	7.77586	5.0972	9.6558	3.37641	976	436	910	4421	2802	3358	1563	1786	1738	1668	2639	2110	673	177	702	433	828	310
gene-GIB67_000993	JACGCM010001557.1	738742	739822	-	GIB67_000993	23393	rna-gnl|WGS:JACGCM|KingUnif02142.1	GO:0003674(molecular_function);GO:0005886(plasma membrane);GO:0009506(plasmodesma);GO:0016021(integral component of membrane);GO:0042742(defense response to bacterium)	NA	NA	NA	hypothetical protein CEY00_Acc30285 [Actinidia chinensis var. chinensis]	NA	1.54171	2.5473	1.63361	1.63634	0.775838	0.431611	0.487609	0	3.03011	1.06934	1.15816	0.959578	0.137739	0.314103	0.07011	0	0.082755	0.409702	64	117	67	82	37	22	22	0	127	47	59	45	7	16	4	0	4	20
gene-GIB67_000994	JACGCM010001557.1	742662	744860	-	GIB67_000994	23394	rna-gnl|WGS:JACGCM|KingUnif09793.1	GO:0003723(RNA binding);GO:0005634(nucleus);GO:0008150(biological_process)	03015(mRNA surveillance pathway)	K14398	NA	RNA recognition motif domain [Macleaya cordata]	NA	16.4698	14.6032	11.9902	22.428	19.6262	20.2193	18.4927	22.8668	17.7286	20.4079	35.8352	21.2737	29.6895	18.0059	29.105	15.8499	18.954	18.3166	1664	1637	1204	2749	2289	2439	2038	1917	1811	2173	4468	2409	3390	2212	3271	1677	2022	2089
gene-GIB67_000995	JACGCM010001557.1	735251	737629	-	GIB67_000995	23392	rna-gnl|WGS:JACGCM|KingUnif27490.1	GO:0003674(molecular_function);GO:0005886(plasma membrane);GO:0009506(plasmodesma);GO:0016021(integral component of membrane);GO:0042742(defense response to bacterium)	NA	NA	NA	hypothetical protein CEY00_Acc30285 [Actinidia chinensis var. chinensis]	NA	0.511305	0.419913	0.553725	0.137318	0.265369	0.133662	0.72582	0.526259	1.29337	0.834523	1.56402	0.094164	0.243006	0	0.218635	0.1241	0.611094	0.57853	28	25	30	9	17	9	43	24	70	47	103	6	15	0	13	7	35	35
gene-GIB67_000996	JACGCM010001557.1	773975	774175	+	GIB67_000996	23396	rna-gnl|WGS:JACGCM|KingUnif13902.1	GO:0016020(membrane);GO:0016709(oxidoreductase activity, acting on paired donors, with incorporation or reduction of molecular oxygen, NAD(P)H as one donor, and incorporation of one atom of oxygen);GO:0044550(secondary metabolite biosynthetic process)	NA	NA	NA	Cytochrome P450 [Cinnamomum micranthum f. kanehirae]	NA	0.140073	0.276481	0	0.946618	0.129732	0.810302	1.53927	1.79721	2.34873	0.216577	0.701655	0.205802	0	0.013905	0	0.193807	1.33922	0.502804	2	4	0	13	2	11	19	17	27	3	10	3	0	1	0	3	16	7
gene-GIB67_000997	JACGCM010001557.1	864308	866996	+	GIB67_000997	23406	rna-gnl|WGS:JACGCM|KingUnif39248.1	GO:0016020(membrane);GO:0016709(oxidoreductase activity, acting on paired donors, with incorporation or reduction of molecular oxygen, NAD(P)H as one donor, and incorporation of one atom of oxygen);GO:0044550(secondary metabolite biosynthetic process)	NA	NA	NA	Cytochrome P450 [Macleaya cordata]	NA	22.6499	38.7936	12.0673	0.069571	0.062082	0.462425	0	0.256152	0.052677	23.0913	0.055085	0.785563	43.6495	8.37249	2.67688	0.133931	6.98849	9.95556	2133	4053	1129	8	7	52	0	21	6	2292	7	83	4645	959	281	14	695	1059
gene-GIB67_000998	JACGCM010001557.1	830388	832413	+	GIB67_000998	23403	rna-gnl|WGS:JACGCM|KingUnif24585.1	GO:0010334(sesquiterpene synthase activity);GO:0033383(geranyl diphosphate metabolic process)	00909(Sesquiterpenoid and triterpenoid biosynthesis)	K15803	EC:4.2.3.75	TPS02 [Liquidambar formosana]	NA	0	0	0.037727	0	0	0.063049	0	0	0	0	0	0.713667	0.368356	3.59265	0.146019	0.088976	17.539	0	0	0	4	0	0	7	0	0	0	0	0	69	36	372	14	8	1575	0
gene-GIB67_000999	JACGCM010001557.1	845225	862366	+	GIB67_000999	23404	rna-gnl|WGS:JACGCM|KingUnif05123.1	GO:0004175(endopeptidase activity);GO:0005634(nucleus);GO:0008540(proteasome regulatory particle, base subcomplex);GO:0034515(proteasome storage granule);GO:0043161(proteasome-mediated ubiquitin-dependent protein catabolic process)	03050(Proteasome)	K03028	NA	Proteasome/cyclosome repeat [Macleaya cordata]	NA	19.2749	19.996	15.8012	13.5577	17.3767	14.0796	25.7197	23.9489	32.2515	20.1578	26.1744	18.6337	46.559	19.1718	47.6655	30.6827	28.4939	23.3139	2791	3211	2272	2381	2904	2433	4060	2877	4719	3075	4676	3023	7617	3374	7676	4649	4355	3810
gene-GIB67_001000	JACGCM010001557.1	801174	804404	+	GIB67_001000	23399	rna-gnl|WGS:JACGCM|KingUnif40010.1	GO:0016020(membrane);GO:0016709(oxidoreductase activity, acting on paired donors, with incorporation or reduction of molecular oxygen, NAD(P)H as one donor, and incorporation of one atom of oxygen);GO:0044550(secondary metabolite biosynthetic process)	NA	NA	NA	Cytochrome P450 [Macleaya cordata]	NA	0.956982	0.583524	0.413341	0.387432	0.176572	0	0.57885	0.822584	0.514843	0.536269	0.332265	0.449191	4.23455	2.29082	5.02305	6.64038	1.93054	6.46905	91	61	39	45	20	0	60	65	50	54	39	48	451	263	527	655	193	688
gene-GIB67_001001	JACGCM010001557.1	805340	807272	+	GIB67_001001	23400	rna-gnl|WGS:JACGCM|KingUnif36763.1	GO:0016020(membrane);GO:0016709(oxidoreductase activity, acting on paired donors, with incorporation or reduction of molecular oxygen, NAD(P)H as one donor, and incorporation of one atom of oxygen);GO:0044550(secondary metabolite biosynthetic process)	NA	NA	NA	premnaspirodiene oxygenase-like [Papaver somniferum]	NA	0.616224	0.205228	0.243739	0.640971	0.067703	0.060576	0.225119	0.055133	0.491954	0.641666	2.23609	0.163426	0.884213	0.719645	0.789931	4.00049	3.65239	1.37899	54	20	22	68	7	7	22	4	44	59	240	16	87	76	77	364	335	136
gene-GIB67_001002	JACGCM010001557.1	813107	814718	-	GIB67_001002	23401	rna-gnl|WGS:JACGCM|KingUnif35027.1	GO:0016020(membrane);GO:0016709(oxidoreductase activity, acting on paired donors, with incorporation or reduction of molecular oxygen, NAD(P)H as one donor, and incorporation of one atom of oxygen);GO:0044550(secondary metabolite biosynthetic process)	00460(Cyanoamino acid metabolism)	K00495	EC:1.14.14.44	hypothetical protein AQUCO_09300003v1 [Aquilegia coerulea]	NA	0.660824	0.241715	0.181388	0	0	0	0.035713	0	0	0.721832	0.376393	0.147079	0.667237	0.930354	2.06203	3.5155	13.0208	3.57565	56	23	16	0	0	0	4	0	0	64	39	14	64	95	193	309	1154	339
gene-GIB67_001003	JACGCM010001557.1	857991	859232	-	GIB67_001003	23405	rna-gnl|WGS:JACGCM|KingUnif32809.1	GO:0001181(transcription factor activity, core RNA polymerase I binding);GO:0003743(translation initiation factor activity);GO:0005634(nucleus);GO:0006360(transcription by RNA polymerase I);GO:0006413(translational initiation)	NA	NA	NA	PREDICTED: RNA polymerase I-specific transcription initiation factor RRN3-like [Nelumbo nucifera]	NA	0	0.321847	0.063816	0.058521	0.298563	0.094619	0	0	0	0.054029	0.189226	0	0.05099	0.117927	0.299614	0.157667	0	0.278129	0	21	4	5	20	7	0	0	0	4	14	0	4	9	20	10	0	19
gene-GIB67_001005	JACGCM010001557.1	943541	951025	+	GIB67_001005	23416	rna-gnl|WGS:JACGCM|KingUnif06504.1	GO:0003677(DNA binding);GO:0005634(nucleus);GO:0005677(chromatin silencing complex);GO:0005737(cytoplasm);GO:0006342(chromatin silencing);GO:0006355(regulation of transcription, DNA-templated);GO:0016787(hydrolase activity);GO:0046872(metal ion binding);GO:0070403(NAD+ binding)	NA	NA	NA	PREDICTED: NAD-dependent protein deacetylase SRT1 isoform X1 [Nelumbo nucifera]	NA	7.40327	5.52693	4.41321	8.80993	7.64073	8.29908	8.97882	7.36632	9.26936	9.40659	11.3061	12.8811	15.3065	5.10135	11.1905	7.54442	11.6261	6.65578	744	616	440	1073	886	995	983	614	941	995	1401	1449	1737	623	1250	793	1233	755
gene-GIB67_001006	JACGCM010001557.1	940157	942594	+	GIB67_001006	23415	rna-gnl|WGS:JACGCM|KingUnif13230.1	GO:0003677(DNA binding);GO:0003700(DNA binding transcription factor activity);GO:0005634(nucleus);GO:0006351(transcription, DNA-templated);GO:0006355(regulation of transcription, DNA-templated)	00040(Pentose and glucuronate interconversions)	K01051	EC:3.1.1.11	SANT/Myb domain [Macleaya cordata]	NA	2.39861	2.75801	2.00396	2.43086	3.49144	3.22802	5.22799	5.14712	4.4098	3.72504	15.0072	4.12933	15.442	18.4225	16.9309	13.7881	12.9044	8.43035	225	287	187	276	377	361	534	400	417	368	1732	433	1632	2095	1761	1350	1274	890
gene-GIB67_001007	JACGCM010001557.1	960911	963270	+	GIB67_001007	23418	rna-gnl|WGS:JACGCM|KingUnif13199.1	GO:0010334(sesquiterpene synthase activity);GO:0033383(geranyl diphosphate metabolic process)	00909(Sesquiterpenoid and triterpenoid biosynthesis)	K15803	EC:4.2.3.75	TPS02 [Liquidambar formosana]	NA	0.084071	0.05035	0.202182	0.409879	0.450769	0.447619	0	0	0.133025	0	0	0.626761	0	0	0.038564	0	0	0	8	6	19	47	49	50	0	0	13	0	0	66	0	0	4	0	0	0
gene-GIB67_001008	JACGCM010001557.1	980150	981485	+	GIB67_001008	23419	rna-gnl|WGS:JACGCM|KingUnif02736.1	GO:0003700(DNA binding transcription factor activity);GO:0005515(protein binding);GO:0005634(nucleus);GO:0006351(transcription, DNA-templated);GO:0009738(abscisic acid-activated signaling pathway);GO:0009785(blue light signaling pathway);GO:0009793(embryo development ending in seed dormancy);GO:0010262(somatic embryogenesis);GO:0043565(sequence-specific DNA binding);GO:0045723(positive regulation…	NA	NA	NA	nuclear transcription factor Y subunit B-6-like [Helianthus annuus]	NA	0	0.32382	0	0	0	0	0	0	0.167503	0.088337	0	0	0	0	0.231662	0.083857	0.088459	0.214199	0	16	0	0	0	0	0	0	8	4	0	0	0	0	11	4	4	11
gene-GIB67_001009	JACGCM010001557.1	952433	957918	+	GIB67_001009	23417	rna-gnl|WGS:JACGCM|KingUnif36941.1	GO:0005215(transporter activity);GO:0005524(ATP binding);GO:0005886(plasma membrane);GO:0006810(transport);GO:0006979(response to oxidative stress);GO:0007623(circadian rhythm);GO:0009507(chloroplast);GO:0009644(response to high light intensity);GO:0009941(chloroplast envelope);GO:0010150(leaf senescence);GO:0016021(integral component of membrane);GO:0016301(kinase activity);GO:0016310(phosphoryl…	04626(Plant-pathogen interaction)	K13457	NA	UbiB domain [Macleaya cordata]	NA	47.1321	28.9462	70.9355	837.293	444.055	914.533	104.072	72.1733	94.5691	17.7367	22.6123	200.481	14.7501	10.6166	14.8922	13.0175	15.7161	12.2287	4816	3282	7200	103786	52368	111543	11596	6120	9767	1910	2851	22957	1704	1319	1693	1393	1696	1411
gene-GIB67_001010	JACGCM010001557.1	910688	914213	+	GIB67_001010	23411	rna-gnl|WGS:JACGCM|KingUnif27157.1	GO:0000428(DNA-directed RNA polymerase complex);GO:0003899(DNA-directed 5'-3' RNA polymerase activity)	00230(Purine metabolism);00240(Pyrimidine metabolism);03020(RNA polymerase)	K03046	EC:2.7.7.6	hypothetical protein F511_10975 [Dorcoceras hygrometricum]	NA	0.057595	0.036167	0.171807	0.051271	0.170343	0.05062	0.068044	0.513126	0.441309	0.094757	0.125112	0.158043	0.175943	0.141175	0.188524	0.240554	0.258702	0.140874	6	4	16	6	18	6	7	38	40	9	14	16	18	16	19	23	25	15
gene-GIB67_001011	JACGCM010001557.1	889815	892198	+	GIB67_001011	23408	rna-gnl|WGS:JACGCM|KingUnif13772.1	GO:0016020(membrane);GO:0016709(oxidoreductase activity, acting on paired donors, with incorporation or reduction of molecular oxygen, NAD(P)H as one donor, and incorporation of one atom of oxygen);GO:0044550(secondary metabolite biosynthetic process)	NA	NA	NA	cytochrome P450 family 71 subfamily BE polypeptide 54 [Sinopodophyllum hexandrum]	NA	6.04337	7.77822	7.75718	20.8898	30.436	48.5169	32.4849	15.1161	17.2676	25.9681	0.97749	36.9583	10.5355	17.7721	4.31194	1.45003	0.507265	5.79716	632	902	805	2647	3669	6048	3700	1310	1823	2858	126	4326	1244	2257	501	159	56	684
gene-GIB67_001012	JACGCM010001557.1	880987	883483	+	GIB67_001012	23407	rna-gnl|WGS:JACGCM|KingUnif31682.1	GO:0016020(membrane);GO:0016709(oxidoreductase activity, acting on paired donors, with incorporation or reduction of molecular oxygen, NAD(P)H as one donor, and incorporation of one atom of oxygen);GO:0044550(secondary metabolite biosynthetic process)	NA	NA	NA	Cytochrome P450 [Macleaya cordata]	NA	0.967489	0.397546	1.32014	2.99518	0.519326	1.44993	5.27513	7.47012	2.77191	1.12657	0.328205	3.92511	1.33759	3.46547	1.0297	2.90905	5.38249	7.92401	98	45	133	368	61	175	582	627	284	120	41	445	153	426	116	308	575	904
[truncated: 29,926 more rows]
