# Supplementary material for: Insights into the Adaptation to High Altitudes from Transcriptome Profiling: A Case Study of an Endangered Species, Kingdonia uniflora
Source: Genes (Basel). 2023 Jun 19;14(6):1291. doi: 10.3390/genes14061291 (PMC10298588; doi:10.3390/genes14061291)
Supplement: Supplementary file 1 [file genes-14-01291-s001.zip › Supplemental Table S5.xlsx]

## Sheet: Sheet1
gene_id	gene_name	EntrezID	transcript_id	GO	KEGG	KO_ENTRY	EC	Description	trans_type	FPKM.A_1	FPKM.A_2	FPKM.A_3	FPKM.B_1	FPKM.B_2	FPKM.B_3	FPKM.C_1	FPKM.C_2	FPKM.C_3	pval	qval	significant
gene-GIB67_012404	GIB67_012404	33567	rna-gnl|WGS:JACGCM|KingUnif14133.1	GO:0003674(molecular_function);GO:0008150(biological_process);GO:0016021(integral component of membrane)	NA	NA	NA	hypothetical protein BVC80_9101g254 [Macleaya cordata]	NA	3872.65	3692.75	3916.8	8.8947	9.51651	12.2496	21.8606	43.3887	21.5606	1.83955e-116	3.78303e-112	yes
gene-GIB67_001110	GIB67_001110	23503	rna-gnl|WGS:JACGCM|KingUnif13352.1	GO:0003674(molecular_function);GO:0005777(peroxisome);GO:0005886(plasma membrane);GO:0008150(biological_process);GO:0016021(integral component of membrane)	NA	NA	NA	hypothetical protein AQUCO_00400267v1 [Aquilegia coerulea]	NA	0.728139	0.542599	0.567184	69.5881	45.8802	70.7727	2.23136	2.41449	2.71583	5.4601e-116	5.61434e-112	yes
gene-GIB67_030796	GIB67_030796	40039	rna-gnl|WGS:JACGCM|KingUnif06248.1	GO:0004860(protein kinase inhibitor activity);GO:0005515(protein binding);GO:0005575(cellular_component);GO:0007049(cell cycle)	NA	NA	NA	PREDICTED: uncharacterized protein LOC103959733 [Pyrus x bretschneideri]	NA	1.0741	1.02935	1.22722	144.441	166.971	227.388	2.27319	2.62972	1.5475	2.90389e-114	1.99062e-110	yes
gene-GIB67_039214	GIB67_039214	21285	rna-gnl|WGS:JACGCM|KingUnif26317.1	GO:0004838(L-tyrosine:2-oxoglutarate aminotransferase activity);GO:0005737(cytoplasm);GO:0005829(cytosol);GO:0006572(tyrosine catabolic process);GO:0008483(transaminase activity);GO:0009058(biosynthetic process);GO:0010189(vitamin E biosynthetic process);GO:0030170(pyridoxal phosphate binding)	00270(Cysteine and methionine metabolism);00350(Tyrosine metabolism);00360(Phenylalanine metabolism);00400(Phenylalanine, tyrosine and tryptophan biosynthesis);00130(Ubiquinone and other terpenoid-quinone biosynthesis);00950(Isoquinoline alkaloid biosynthesis);00960(Tropane, piperidine and pyridine alkaloid biosynthesis)	K00815	EC:2.6.1.5	Aminotransferase [Macleaya cordata]	NA	0.651872	0.685285	0.848742	68.8081	50.4386	68.9754	1.2378	2.28577	1.30671	8.68733e-105	4.46638e-101	yes
gene-GIB67_009115	GIB67_009115	15836	rna-gnl|WGS:JACGCM|KingUnif23752.1	GO:0000923(equatorial microtubule organizing center);GO:0005200(structural constituent of cytoskeleton);GO:0005813(centrosome);GO:0005816(spindle pole body);GO:0008275(gamma-tubulin small complex);GO:0031122(cytoplasmic microtubule organization);GO:0043015(gamma-tubulin binding);GO:0051011(microtubule minus-end binding);GO:0051298(centrosome duplication);GO:0051415(microtubule nucleation by inter…	NA	NA	NA	Spc97/Spc98 [Macleaya cordata]	NA	278.107	367.596	189.965	2.94881	5.24173	3.12846	4.01367	3.66892	3.90976	1.24852e-104	5.13516e-101	yes
gene-GIB67_024060	GIB67_024060	30764	rna-gnl|WGS:JACGCM|KingUnif18157.1	GO:0005737(cytoplasm);GO:0009408(response to heat)	04141(Protein processing in endoplasmic reticulum)	K13993	NA	hypothetical protein VITISV_044042 [Vitis vinifera]	NA	174.287	157.782	172.521	0.765463	0.926446	1.03998	12.826	16.6044	8.39586	6.93024e-103	2.37534e-99	yes
gene-GIB67_011867	GIB67_011867	42725	rna-gnl|WGS:JACGCM|KingUnif34537.1	GO:0000145(exocyst);GO:0005634(nucleus);GO:0006887(exocytosis);GO:0006904(vesicle docking involved in exocytosis)	NA	NA	NA	Exocyst complex protein Exo70 [Macleaya cordata]	NA	0.741353	0.535119	0.885058	52.6985	59.8807	84.7183	2.13416	2.44772	1.41192	6.2778e-102	1.84433e-98	yes
gene-GIB67_004681	GIB67_004681	2667	rna-gnl|WGS:JACGCM|KingUnif11096.1	GO:0003674(molecular_function);GO:0005739(mitochondrion);GO:0005777(peroxisome);GO:0010150(leaf senescence);GO:0016021(integral component of membrane)	NA	NA	NA	NADH-ubiquinone reductase complex 1 MLRQ subunit-like protein [Solanum lycopersicum]	NA	66.0961	61.3421	110.924	2.34151	1.11319	1.15769	528.173	541.75	566.018	5.18249e-98	1.33223e-94	yes
gene-GIB67_036540	GIB67_036540	33461	rna-gnl|WGS:JACGCM|KingUnif16151.1	GO:0005515(protein binding);GO:0005737(cytoplasm);GO:0009408(response to heat)	04141(Protein processing in endoplasmic reticulum)	K13993	NA	17.8 kDa class I heat shock protein-like [Papaver somniferum]	NA	8285	8653.04	5488.57	17.3698	16.4978	27.571	89.0646	84.1656	47.7018	1.64192e-97	3.75179e-94	yes
gene-GIB67_038798	GIB67_038798	28721	rna-gnl|WGS:JACGCM|KingUnif35089.1	GO:0005515(protein binding);GO:0005737(cytoplasm);GO:0009408(response to heat)	04141(Protein processing in endoplasmic reticulum)	K13993	NA	17.8 kDa class I heat shock protein-like [Papaver somniferum]	NA	7194.05	7846.25	4592.22	16.3081	15.7302	25.7848	85.5907	81.0174	45.7752	4.24562e-95	8.73111e-92	yes
gene-GIB67_007295	GIB67_007295	5412	rna-gnl|WGS:JACGCM|KingUnif02717.1	GO:0005634(nucleus);GO:0008270(zinc ion binding);GO:0032436(positive regulation of proteasomal ubiquitin-dependent protein catabolic process)	NA	NA	NA	zinc finger protein [Macleaya cordata]	NA	3.95227	3.78107	4.59528	80.2522	75.4168	67.3217	2.86306	2.72674	3.43226	4.78125e-95	8.93876e-92	yes
gene-GIB67_021163	GIB67_021163	14309	rna-gnl|WGS:JACGCM|KingUnif30949.1	GO:0003824(catalytic activity);GO:0005634(nucleus);GO:0009408(response to heat);GO:0010286(heat acclimation);GO:0010608(posttranscriptional regulation of gene expression)	NA	NA	NA	(2R)-phospho-3-sulfolactate synthase [Macleaya cordata]	NA	1077.92	1465.76	894.24	14.0029	13.6355	11.433	44.4648	45.2953	27.4964	2.47462e-94	4.24088e-91	yes
gene-GIB67_005997	GIB67_005997	24933	rna-gnl|WGS:JACGCM|KingUnif25847.1	GO:0005737(cytoplasm);GO:0009408(response to heat)	04141(Protein processing in endoplasmic reticulum)	K13993	NA	Small heat shock protein HSP [Trema orientale]	NA	1315.3	1360.75	1074.49	3.41263	4.08129	4.59769	114.293	133.232	60.2034	2.7038e-94	4.2772e-91	yes
gene-GIB67_037211	GIB67_037211	19490	rna-gnl|WGS:JACGCM|KingUnif21584.1	GO:0005515(protein binding);GO:0005524(ATP binding);GO:0005730(nucleolus);GO:0005737(cytoplasm);GO:0005794(Golgi apparatus);GO:0005829(cytosol);GO:0005886(plasma membrane);GO:0006457(protein folding);GO:0009408(response to heat);GO:0016020(membrane);GO:0045087(innate immune response);GO:0051082(unfolded protein binding);GO:0051131(chaperone-mediated protein complex assembly);GO:0071277(cellular r…	04141(Protein processing in endoplasmic reticulum);04626(Plant-pathogen interaction)	K04079	NA	Heat shock protein Hsp90 family [Macleaya cordata]	NA	317.168	358.484	102.174	0.853848	0.467957	0.931314	1.27001	1.63441	1.72901	1.29998e-93	1.90957e-90	yes
gene-GIB67_019021	GIB67_019021	16681	rna-gnl|WGS:JACGCM|KingUnif31208.1	GO:0002679(respiratory burst involved in defense response);GO:0004842(ubiquitin-protein transferase activity);GO:0005737(cytoplasm);GO:0005829(cytosol);GO:0006952(defense response);GO:0009414(response to water deprivation);GO:0010200(response to chitin);GO:0016567(protein ubiquitination);GO:0051865(protein autoubiquitination)	NA	NA	NA	hypothetical protein AQUCO_00900692v1 [Aquilegia coerulea]	NA	0.185679	0.149473	0.330579	43.5141	39.4757	79.394	1.06062	1.51696	1.10258	1.64447e-93	2.25457e-90	yes
gene-GIB67_028015	GIB67_028015	1593	rna-gnl|WGS:JACGCM|KingUnif11751.1	GO:0005737(cytoplasm);GO:0009408(response to heat)	04141(Protein processing in endoplasmic reticulum)	K13993	NA	HSP20 domain-containing protein [Cephalotus follicularis]	NA	1435.8	1492.8	1311.08	3.13255	3.05922	4.56025	89.4588	113.542	40.5284	3.10788e-92	3.9946e-89	yes
gene-GIB67_006399	GIB67_006399	4201	rna-gnl|WGS:JACGCM|KingUnif21012.1	GO:0003677(DNA binding);GO:0003700(DNA binding transcription factor activity);GO:0005634(nucleus);GO:0006351(transcription, DNA-templated);GO:0006355(regulation of transcription, DNA-templated);GO:0009873(ethylene-activated signaling pathway);GO:0010200(response to chitin)	NA	NA	NA	hypothetical protein JCGZ_20463 [Jatropha curcas]	NA	1.29592	1.39747	1.37737	232.914	317.574	393.232	0.567938	2.90853	1.28098	4.7326e-90	5.72506e-87	yes
gene-GIB67_007354	GIB67_007354	5477	rna-gnl|WGS:JACGCM|KingUnif20357.1	GO:0005509(calcium ion binding);GO:0005575(cellular_component);GO:0008150(biological_process)	04016(MAPK signaling pathway - plant);04070(Phosphatidylinositol signaling system);04626(Plant-pathogen interaction)	K02183	NA	putative calcium-binding protein CML45 [Cinnamomum micranthum f. kanehirae]	NA	0.998255	0.215261	0.616586	220.911	120.822	159.181	4.21275	2.55912	2.21668	1.62922e-86	1.86139e-83	yes
gene-GIB67_040472	GIB67_040472	39348	rna-gnl|WGS:JACGCM|KingUnif15789.1	GO:0005575(cellular_component);GO:0008150(biological_process)	04144(Endocytosis)	K12471	NA	Epsin domain [Macleaya cordata]	NA	4.22307	3.94653	5.24428	113.361	127.683	123.842	5.04333	7.55731	7.50899	2.19608e-86	2.37697e-83	yes
gene-GIB67_002184	GIB67_002184	42397	rna-gnl|WGS:JACGCM|KingUnif39870.1	GO:0000166(nucleotide binding);GO:0003723(RNA binding);GO:0003729(mRNA binding);GO:0004519(endonuclease activity);GO:0006397(mRNA processing);GO:0009451(RNA modification);GO:0009507(chloroplast);GO:0009570(chloroplast stroma)	NA	NA	NA	PREDICTED: pentatricopeptide repeat-containing protein At3g09650, chloroplastic [Nelumbo nucifera]	NA	1.63076	1.37799	1.75025	30.5232	38.0568	37.9117	2.74314	2.75439	2.63912	2.82651e-86	2.90636e-83	yes
gene-GIB67_002618	GIB67_002618	15137	rna-gnl|WGS:JACGCM|KingUnif32906.1	NA	NA	NA	NA	hypothetical protein BVC80_1117g79 [Macleaya cordata]	NA	3.33411	3.04854	2.12998	70.5558	68.4581	61.3432	3.55509	3.37438	4.25805	2.35406e-82	2.30529e-79	yes
gene-GIB67_025037	GIB67_025037	13877	rna-gnl|WGS:JACGCM|KingUnif37141.1	GO:0003677(DNA binding);GO:0003700(DNA binding transcription factor activity);GO:0005634(nucleus);GO:0006351(transcription, DNA-templated);GO:0006355(regulation of transcription, DNA-templated);GO:0007275(multicellular organism development);GO:0009414(response to water deprivation);GO:0009737(response to abscisic acid);GO:0043565(sequence-specific DNA binding);GO:0045893(positive regulation of tr…	NA	NA	NA	NAC domain-containing protein [Actinidia chinensis var. chinensis]	NA	6.7336	7.60335	13.1238	614.612	441.733	521.222	16.5118	19.7928	16.3521	9.27294e-82	8.66809e-79	yes
gene-GIB67_012507	GIB67_012507	18370	rna-gnl|WGS:JACGCM|KingUnif25989.1	GO:0007275(multicellular organism development);GO:0009687(abscisic acid metabolic process);GO:0010268(brassinosteroid homeostasis);GO:0010295((+)-abscisic acid 8'-hydroxylase activity);GO:0016125(sterol metabolic process);GO:0016132(brassinosteroid biosynthetic process)	00906(Carotenoid biosynthesis)	K09843	EC:1.14.13.93	hypothetical protein B456_004G177200, partial [Gossypium raimondii]	NA	5.76617	6.12179	8.35636	124.79	202.113	137.481	5.95236	5.70955	5.00842	2.13381e-81	1.9079e-78	yes
gene-GIB67_024640	GIB67_024640	32881	rna-gnl|WGS:JACGCM|KingUnif09926.1	GO:0004252(serine-type endopeptidase activity);GO:0005618(cell wall)	NA	NA	NA	Peptidase S8/S53 domain [Macleaya cordata]	NA	36.0337	74.3762	25.7704	0.128178	0.231868	0.165625	0.860747	1.25919	0.709053	3.61174e-81	3.09481e-78	yes
gene-GIB67_015012	GIB67_015012	19137	rna-gnl|WGS:JACGCM|KingUnif41008.1	GO:0003700(DNA binding transcription factor activity);GO:0005515(protein binding);GO:0005634(nucleus);GO:0006351(transcription, DNA-templated);GO:0006355(regulation of transcription, DNA-templated);GO:0009506(plasmodesma);GO:0009733(response to auxin);GO:0009734(auxin-activated signaling pathway);GO:0016021(integral component of membrane)	04075(Plant hormone signal transduction)	K14484	NA	PREDICTED: auxin-responsive protein IAA28-like [Nelumbo nucifera]	NA	76.2119	56.0509	64.8811	0.341582	0.502771	0.238885	19.5137	12.3624	19.4654	2.60622e-80	2.14388e-77	yes
gene-GIB67_035570	GIB67_035570	36637	rna-gnl|WGS:JACGCM|KingUnif21529.1	GO:0005737(cytoplasm);GO:0009408(response to heat)	04141(Protein processing in endoplasmic reticulum)	K13993	NA	PREDICTED: 17.3 kDa class II heat shock protein [Vitis vinifera]	NA	536.393	425.852	158.069	1.39664	1.99003	2.07196	1.05469	2.95392	1.04335	8.88502e-80	7.02771e-77	yes
gene-GIB67_033042	GIB67_033042	17276	rna-gnl|WGS:JACGCM|KingUnif23712.1	GO:0003700(DNA binding transcription factor activity);GO:0005634(nucleus);GO:0006351(transcription, DNA-templated);GO:0006355(regulation of transcription, DNA-templated);GO:0006952(defense response);GO:0043565(sequence-specific DNA binding)	04016(MAPK signaling pathway - plant);04626(Plant-pathogen interaction)	K13424	NA	PREDICTED: probable WRKY transcription factor 72 [Nelumbo nucifera]	NA	0.158512	0.125553	0.184201	39.8807	34.1706	80.0981	1.75221	0.677205	0.96011	1.40766e-79	1.07217e-76	yes
gene-GIB67_004633	GIB67_004633	24389	rna-gnl|WGS:JACGCM|KingUnif03601.1	GO:0003674(molecular_function);GO:0005739(mitochondrion);GO:0008150(biological_process)	NA	NA	NA	hypothetical protein AQUCO_01400226v1 [Aquilegia coerulea]	NA	771.008	1128.19	265.534	3.46128	3.19134	3.34392	12.2806	14.1517	9.94645	3.07442e-78	2.25805e-75	yes
gene-GIB67_019867	GIB67_019867	21908	rna-gnl|WGS:JACGCM|KingUnif11779.1	GO:0000427(plastid-encoded plastid RNA polymerase complex);GO:0005515(protein binding);GO:0006351(transcription, DNA-templated);GO:0006355(regulation of transcription, DNA-templated);GO:0009408(response to heat);GO:0009416(response to light stimulus);GO:0009507(chloroplast);GO:0009644(response to high light intensity);GO:0009658(chloroplast organization);GO:0042542(response to hydrogen peroxide);…	04141(Protein processing in endoplasmic reticulum)	K13993	NA	small heat shock protein, chloroplastic-like [Durio zibethinus]	NA	4582.6	7370.18	3740.4	6.61617	6.92102	13.1061	56.0933	113.107	51.1322	4.79848e-78	3.40279e-75	yes
gene-GIB67_032821	GIB67_032821	12524	rna-gnl|WGS:JACGCM|KingUnif42890.1	GO:0004601(peroxidase activity);GO:0009505(plant-type cell wall);GO:0009664(plant-type cell wall organization)	00940(Phenylpropanoid biosynthesis)	K00430	EC:1.11.1.7	PREDICTED: putative Peroxidase 48 isoform X1 [Vitis vinifera]	NA	185.99	252.059	188.344	7.23971	7.32241	6.37701	20.5955	24.6098	23.1748	1.42812e-77	9.78977e-75	yes
gene-GIB67_014653	GIB67_014653	29669	rna-gnl|WGS:JACGCM|KingUnif21097.1	GO:0004674(protein serine/threonine kinase activity);GO:0005886(plasma membrane);GO:0006468(protein phosphorylation)	NA	NA	NA	PREDICTED: G-type lectin S-receptor-like serine/threonine-protein kinase At2g19130 [Nelumbo nucifera]	NA	0.730177	0.705418	0.883359	0.054512	0.134898	0.01878	15.3254	21.6372	20.5329	1.77573e-77	1.17799e-74	yes
gene-GIB67_032743	GIB67_032743	18073	rna-gnl|WGS:JACGCM|KingUnif17347.1	GO:0005215(transporter activity);GO:0005886(plasma membrane);GO:0006857(oligopeptide transport);GO:0015293(symporter activity);GO:0016020(membrane);GO:0016021(integral component of membrane);GO:0042128(nitrate assimilation);GO:0055085(transmembrane transport)	NA	NA	NA	hypothetical protein AQUCO_03200062v1 [Aquilegia coerulea]	NA	2.25428	1.57672	2.73016	214.521	106.973	139.342	8.1652	10.8143	7.5615	1.59402e-76	1.02441e-73	yes
gene-GIB67_007677	GIB67_007677	16083	rna-gnl|WGS:JACGCM|KingUnif12992.1	GO:0009408(response to heat)	04141(Protein processing in endoplasmic reticulum)	K13993	NA	17.3 kDa class I heat shock protein [Ricinus communis]	NA	4609.85	4062.41	3691.69	28.5189	21.166	20.3736	288.043	269.605	150.317	7.50376e-76	4.67621e-73	yes
gene-GIB67_027144	GIB67_027144	3930	rna-gnl|WGS:JACGCM|KingUnif40139.1	GO:0005737(cytoplasm);GO:0009408(response to heat)	04141(Protein processing in endoplasmic reticulum)	K13993	NA	PREDICTED: 17.3 kDa class II heat shock protein [Vitis vinifera]	NA	11396.2	13762.2	11596.2	53.0161	47.3047	48.792	782.03	952.565	495.058	9.67808e-76	5.85381e-73	yes
gene-GIB67_034645	GIB67_034645	4337	rna-gnl|WGS:JACGCM|KingUnif38730.1	GO:0005524(ATP binding);GO:0005618(cell wall);GO:0005634(nucleus);GO:0005739(mitochondrion);GO:0005774(vacuolar membrane);GO:0005794(Golgi apparatus);GO:0005829(cytosol);GO:0005886(plasma membrane);GO:0006351(transcription, DNA-templated);GO:0006355(regulation of transcription, DNA-templated);GO:0006457(protein folding);GO:0006986(response to unfolded protein);GO:0009266(response to temperature s…	03040(Spliceosome);04141(Protein processing in endoplasmic reticulum);04144(Endocytosis)	K03283	NA	heat shock 70 kDa protein [Prunus avium]	NA	7286.43	7927.09	6169.05	32.4448	41.7671	43.0725	207.816	272.347	190.84	3.89018e-75	2.28576e-72	yes
gene-GIB67_030856	GIB67_030856	40100	rna-gnl|WGS:JACGCM|KingUnif13853.1	GO:0003674(molecular_function);GO:0005634(nucleus);GO:0008150(biological_process)	NA	NA	NA	unnamed protein product, partial [Vitis vinifera]	NA	27.2727	19.8688	24.4843	653.907	536.397	466.107	23.4884	35.7213	24.8221	6.38823e-75	3.64928e-72	yes
gene-GIB67_007979	GIB67_007979	303	rna-gnl|WGS:JACGCM|KingUnif33073.1	GO:0005737(cytoplasm);GO:0009408(response to heat)	04141(Protein processing in endoplasmic reticulum)	K13993	NA	PREDICTED: 17.3 kDa class II heat shock protein [Vitis vinifera]	NA	8991.73	9325.67	8189.94	25.0577	34.0759	40.9121	637.178	722.884	326.571	9.67343e-75	5.3766e-72	yes
gene-GIB67_020372	GIB67_020372	37173	rna-gnl|WGS:JACGCM|KingUnif06106.1	GO:0007275(multicellular organism development);GO:0009742(brassinosteroid mediated signaling pathway);GO:0009826(unidimensional cell growth);GO:0016021(integral component of membrane);GO:0016595(glutamate binding);GO:0050832(defense response to fungus);GO:0060548(negative regulation of cell death);GO:1905421(regulation of plant organ morphogenesis)	NA	NA	NA	BI1-like protein [Sesamum indicum]	NA	1467.12	2382.97	626.66	2.72016	2.11047	4.59648	12.5242	8.28487	5.7017	1.95522e-74	1.05813e-71	yes
gene-GIB67_007931	GIB67_007931	25628	rna-gnl|WGS:JACGCM|KingUnif10347.1	GO:0003674(molecular_function);GO:0005739(mitochondrion);GO:0009408(response to heat);GO:0046686(response to cadmium ion)	04141(Protein processing in endoplasmic reticulum)	K13993	NA	PREDICTED: LOW QUALITY PROTEIN: small heat shock protein, chloroplastic [Nelumbo nucifera]	NA	3906.91	4274.94	3691.66	17.7085	15.6657	17.5614	332.105	508.25	210.613	3.47158e-73	1.83059e-70	yes
gene-GIB67_031158	GIB67_031158	9520	rna-gnl|WGS:JACGCM|KingUnif03245.1	NA	NA	NA	NA	uncharacterized protein LOC109804371 [Cajanus cajan]	NA	26.0885	13.7913	11.6247	274.987	272.051	280.589	4.94433	6.92751	4.5218	1.56606e-72	8.0515e-70	yes
gene-GIB67_038850	GIB67_038850	6595	rna-gnl|WGS:JACGCM|KingUnif28974.1	GO:0003677(DNA binding);GO:0003723(RNA binding);GO:0003727(single-stranded RNA binding);GO:0005739(mitochondrion);GO:0008150(biological_process);GO:0008270(zinc ion binding);GO:0009507(chloroplast);GO:0043231(intracellular membrane-bounded organelle);GO:1990825(sequence-specific mRNA binding)	04141(Protein processing in endoplasmic reticulum)	K13993	NA	hypothetical protein AQUCO_02500053v1 [Aquilegia coerulea]	NA	1405.66	1269.08	1134.95	8.12072	7.65075	7.81543	90.5987	121.849	55.8607	9.54349e-72	4.78688e-69	yes
gene-GIB67_007978	GIB67_007978	304	rna-gnl|WGS:JACGCM|KingUnif09781.1	GO:0005737(cytoplasm);GO:0009408(response to heat)	04141(Protein processing in endoplasmic reticulum)	K13993	NA	PREDICTED: 17.1 kDa class II heat shock protein-like [Malus domestica]	NA	8946.74	9395.78	7953.01	23.3905	31.2333	37.1723	675.355	861.403	362.169	2.83762e-71	1.38942e-68	yes
gene-GIB67_006146	GIB67_006146	32571	rna-gnl|WGS:JACGCM|KingUnif13606.1	GO:0003674(molecular_function);GO:0005634(nucleus);GO:0009626(plant-type hypersensitive response)	NA	NA	NA	PREDICTED: MACPF domain-containing protein At1g14780 [Nelumbo nucifera]	NA	3.68376	3.19627	3.85798	118.016	169.237	169.284	7.48206	12.8745	14.0374	5.93948e-71	2.84059e-68	yes
gene-GIB67_007367	GIB67_007367	5483	rna-gnl|WGS:JACGCM|KingUnif25212.1	GO:0009507(chloroplast);GO:0016614(oxidoreductase activity, acting on CH-OH group of donors);GO:0016832(aldehyde-lyase activity);GO:0050660(flavin adenine dinucleotide binding);GO:0055114(oxidation-reduction process)	00260(Glycine, serine and threonine metabolism)	K00108	EC:1.1.99.1	hypothetical protein AQUCO_01500360v1 [Aquilegia coerulea]	NA	43.9656	65.4853	35.8666	0.800521	0.810738	0.734338	9.15242	9.50233	6.87262	1.61585e-70	7.55224e-68	yes
gene-GIB67_023087	GIB67_023087	26977	rna-gnl|WGS:JACGCM|KingUnif34230.1	GO:0000149(SNARE binding);GO:0005484(SNAP receptor activity);GO:0005886(plasma membrane);GO:0006886(intracellular protein transport);GO:0006887(exocytosis);GO:0006906(vesicle fusion);GO:0012505(endomembrane system);GO:0016021(integral component of membrane);GO:0031201(SNARE complex);GO:0048278(vesicle docking)	04130(SNARE interactions in vesicular transport)	K08486	NA	t-SNARE [Trema orientale]	NA	21.9401	21.5739	22.2768	338.012	379.263	402.458	35.6911	32.0262	30.83	3.31751e-70	1.5161e-67	yes
gene-GIB67_004426	GIB67_004426	19812	rna-gnl|WGS:JACGCM|KingUnif17914.1	GO:0005794(Golgi apparatus);GO:0008375(acetylglucosaminyltransferase activity);GO:0016757(transferase activity, transferring glycosyl groups)	00510(N-Glycan biosynthesis)	K00737	EC:2.4.1.144	Glycosyl transferase [Macleaya cordata]	NA	4.78399	3.77491	5.17377	105.701	95.8772	64.7993	5.51159	6.64513	5.37344	1.02356e-69	4.576e-67	yes
gene-GIB67_007679	GIB67_007679	16082	rna-gnl|WGS:JACGCM|KingUnif27514.1	GO:0003677(DNA binding);GO:0003723(RNA binding);GO:0003727(single-stranded RNA binding);GO:0005739(mitochondrion);GO:0008150(biological_process);GO:0008270(zinc ion binding);GO:0009507(chloroplast);GO:0043231(intracellular membrane-bounded organelle);GO:1990825(sequence-specific mRNA binding)	04141(Protein processing in endoplasmic reticulum)	K13993	NA	hypothetical protein AQUCO_02500053v1 [Aquilegia coerulea]	NA	2139.58	1793.35	1715.81	8.53418	7.47801	8.46052	115.8	166.677	68.6145	1.63444e-69	7.15156e-67	yes
gene-GIB67_028016	GIB67_028016	1592	rna-gnl|WGS:JACGCM|KingUnif07007.1	GO:0004842(ubiquitin-protein transferase activity);GO:0019005(SCF ubiquitin ligase complex);GO:0031146(SCF-dependent proteasomal ubiquitin-dependent protein catabolic process)	04141(Protein processing in endoplasmic reticulum)	K13993	NA	heat shock protein 17.6 [Medicago sativa]	NA	1237.4	1194.55	1249	5.74546	7.20976	5.36545	194.112	265.003	99.7495	2.74801e-69	1.17735e-66	yes
gene-GIB67_020905	GIB67_020905	26437	rna-gnl|WGS:JACGCM|KingUnif13110.1	GO:0005634(nucleus);GO:0005737(cytoplasm);GO:0005739(mitochondrion);GO:0016787(hydrolase activity);GO:0016818(hydrolase activity, acting on acid anhydrides, in phosphorus-containing anhydrides);GO:0046872(metal ion binding)	NA	NA	NA	PREDICTED: nudix hydrolase 18, mitochondrial [Vitis vinifera]	NA	7.03024	7.67149	6.19027	240.828	267.765	140.359	5.15076	7.11669	9.79216	7.09047e-69	2.97583e-66	yes
gene-GIB67_015836	GIB67_015836	11651	rna-gnl|WGS:JACGCM|KingUnif14443.1	GO:0001671(ATPase activator activity);GO:0005634(nucleus);GO:0005829(cytosol);GO:0006950(response to stress);GO:0051087(chaperone binding)	NA	NA	NA	PREDICTED: activator of 90 kDa heat shock protein ATPase homolog 1-like [Nelumbo nucifera]	NA	271.775	329.855	211.558	10.4857	9.44411	8.49579	20.4279	28.1003	17.4679	5.75719e-68	2.36793e-65	yes
gene-GIB67_028551	GIB67_028551	42681	rna-gnl|WGS:JACGCM|KingUnif15656.1	GO:0004553(hydrolase activity, hydrolyzing O-glycosyl compounds);GO:0005576(extracellular region);GO:0005618(cell wall);GO:0005794(Golgi apparatus);GO:0010411(xyloglucan metabolic process);GO:0016762(xyloglucan:xyloglucosyl transferase activity);GO:0016798(hydrolase activity, acting on glycosyl bonds);GO:0042546(cell wall biogenesis);GO:0048046(apoplast);GO:0071555(cell wall organization)	04075(Plant hormone signal transduction)	K14504	EC:2.4.1.207	probable xyloglucan endotransglucosylase/hydrolase protein 23 [Ziziphus jujuba]	NA	8.64914	2.75707	6.72965	247.642	267.111	239.275	5.11741	7.76224	5.1562	9.54101e-68	3.84727e-65	yes
gene-GIB67_027073	GIB67_027073	3867	rna-gnl|WGS:JACGCM|KingUnif41658.1	GO:0042802(identical protein binding)	NA	NA	NA	heat stress transcription factor A-2d-like isoform X2 [Durio zibethinus]	NA	374.996	733.771	414.881	4.56947	4.95603	2.34174	53.4091	51.3071	53.8805	1.17251e-67	4.63706e-65	yes
gene-GIB67_013167	GIB67_013167	36774	rna-gnl|WGS:JACGCM|KingUnif40821.1	GO:0003674(molecular_function);GO:0005739(mitochondrion);GO:0009408(response to heat);GO:0046686(response to cadmium ion)	04141(Protein processing in endoplasmic reticulum)	K13993	NA	PREDICTED: LOW QUALITY PROTEIN: small heat shock protein, chloroplastic [Nelumbo nucifera]	NA	7887.55	8587.31	7494.2	33.186	32.9009	32.0079	625.741	1004.38	424.545	1.27728e-67	4.95608e-65	yes
gene-GIB67_033335	GIB67_033335	31097	rna-gnl|WGS:JACGCM|KingUnif06737.1	GO:0003700(DNA binding transcription factor activity);GO:0005515(protein binding);GO:0005634(nucleus);GO:0006351(transcription, DNA-templated);GO:0006355(regulation of transcription, DNA-templated);GO:0009555(pollen development);GO:0009942(longitudinal axis specification);GO:0030010(establishment of cell polarity);GO:0043565(sequence-specific DNA binding)	04626(Plant-pathogen interaction)	K18835	NA	PREDICTED: probable WRKY transcription factor 2 [Nelumbo nucifera]	NA	4.94136	4.25342	2.95622	86.8998	63.5413	93.8662	3.91376	4.28541	5.18111	1.96402e-67	7.47962e-65	yes
gene-GIB67_039454	GIB67_039454	34642	rna-gnl|WGS:JACGCM|KingUnif21705.1	GO:0000139(Golgi membrane);GO:0005739(mitochondrion);GO:0005783(endoplasmic reticulum);GO:0005789(endoplasmic reticulum membrane);GO:0005794(Golgi apparatus);GO:0005795(Golgi stack);GO:0006778(porphyrin-containing compound metabolic process);GO:0006970(response to osmotic stress);GO:0009651(response to salt stress);GO:0009737(response to abscisic acid);GO:0016020(membrane);GO:0016021(integral com…	NA	NA	NA	PREDICTED: translocator protein homolog [Vitis vinifera]	NA	4.88292	2.14931	4.34109	122.187	127.39	129.535	3.41496	4.5506	1.98959	8.58734e-67	3.21089e-64	yes
gene-GIB67_033720	GIB67_033720	2971	rna-gnl|WGS:JACGCM|KingUnif14899.1	GO:0004674(protein serine/threonine kinase activity);GO:0005886(plasma membrane);GO:0007166(cell surface receptor signaling pathway)	NA	NA	NA	PREDICTED: putative wall-associated receptor kinase-like 16 [Nelumbo nucifera]	NA	0.129519	0.141532	0.024412	17.0654	31.4345	43.6293	0.63561	0.621167	1.09329	9.97903e-67	3.66462e-64	yes
gene-GIB67_018033	GIB67_018033	5644	rna-gnl|WGS:JACGCM|KingUnif26288.1	GO:0003700(DNA binding transcription factor activity);GO:0005634(nucleus);GO:0043565(sequence-specific DNA binding);GO:0044212(transcription regulatory region DNA binding)	NA	NA	NA	PREDICTED: zinc finger protein ZAT5-like [Gossypium hirsutum]	NA	2.92045	2.04509	2.46713	173.034	79.4753	139.226	14.5585	11.5475	10.5715	2.54341e-66	9.17635e-64	yes
gene-GIB67_032703	GIB67_032703	18025	rna-gnl|WGS:JACGCM|KingUnif41510.1	GO:0004674(protein serine/threonine kinase activity);GO:0005886(plasma membrane);GO:0006468(protein phosphorylation);GO:0006952(defense response);GO:0009506(plasmodesma)	NA	NA	NA	PREDICTED: G-type lectin S-receptor-like serine/threonine-protein kinase At4g27290 [Vitis vinifera]	NA	0.046309	0.052357	0.080087	21.5575	11.078	14.1804	5.33036	4.68221	3.94492	5.29092e-66	1.87599e-63	yes
gene-GIB67_019020	GIB67_019020	16682	rna-gnl|WGS:JACGCM|KingUnif02241.1	GO:0002679(respiratory burst involved in defense response);GO:0004842(ubiquitin-protein transferase activity);GO:0005737(cytoplasm);GO:0005829(cytosol);GO:0006952(defense response);GO:0009414(response to water deprivation);GO:0010200(response to chitin);GO:0016567(protein ubiquitination);GO:0051865(protein autoubiquitination)	NA	NA	NA	hypothetical protein AQUCO_00900692v1 [Aquilegia coerulea]	NA	1.83834	0.836096	2.10816	90.1372	119.792	117.967	4.15127	7.93513	7.64756	6.88734e-66	2.40065e-63	yes
gene-GIB67_033421	GIB67_033421	31183	rna-gnl|WGS:JACGCM|KingUnif03550.1	GO:0005634(nucleus);GO:0005884(actin filament);GO:0009055(electron transfer activity);GO:0009902(chloroplast relocation);GO:0015035(protein disulfide oxidoreductase activity);GO:0045454(cell redox homeostasis);GO:0051017(actin filament bundle assembly)	NA	NA	NA	PREDICTED: glutaredoxin domain-containing cysteine-rich protein CG12206 [Nelumbo nucifera]	NA	6.43871	6.69316	7.01818	122.77	205.491	159.407	16.8868	15.0791	21.309	1.31411e-65	4.44965e-63	yes
gene-GIB67_020630	GIB67_020630	25742	rna-gnl|WGS:JACGCM|KingUnif33080.1	GO:0005515(protein binding);GO:0005524(ATP binding);GO:0005739(mitochondrion);GO:0005983(starch catabolic process);GO:0009507(chloroplast);GO:0009570(chloroplast stroma);GO:0009610(response to symbiotic fungus);GO:0009631(cold acclimation);GO:0009941(chloroplast envelope);GO:0016310(phosphorylation);GO:0046872(metal ion binding);GO:0050521(alpha-glucan, water dikinase activity)	NA	NA	NA	putative transcription elongation factor SPT5 homolog 1 isoform X1 [Phalaenopsis equestris]	NA	0	0.048912	0	0	0	0	22.0728	13.4083	35.1734	1.31986e-65	4.44965e-63	yes
gene-GIB67_038848	GIB67_038848	6596	rna-gnl|WGS:JACGCM|KingUnif39708.1	GO:0005515(protein binding);GO:0005737(cytoplasm);GO:0009408(response to heat);GO:0009644(response to high light intensity);GO:0010286(heat acclimation);GO:0042542(response to hydrogen peroxide)	04141(Protein processing in endoplasmic reticulum)	K13993	NA	Alpha crystallin/Hsp20 domain [Macleaya cordata]	NA	18777.1	16574.2	14891	120.487	90.6103	90.3305	1251.25	1226.06	702.543	1.96579e-65	6.5204e-63	yes
gene-GIB67_033633	GIB67_033633	37568	rna-gnl|WGS:JACGCM|KingUnif28421.1	GO:0003674(molecular_function);GO:0005783(endoplasmic reticulum);GO:0009408(response to heat);GO:0009507(chloroplast)	04141(Protein processing in endoplasmic reticulum)	K13993	NA	coiled-coil domain-containing protein SCD2-like [Carica papaya]	NA	6576.47	5233.64	3915.52	12.7463	14.7111	18.4576	91.2164	53.4595	22.2913	2.08139e-65	6.79426e-63	yes
gene-GIB67_006017	GIB67_006017	24939	rna-gnl|WGS:JACGCM|KingUnif15811.1	GO:0005737(cytoplasm);GO:0009408(response to heat)	04141(Protein processing in endoplasmic reticulum)	K13993	NA	HSP20 domain-containing protein [Cephalotus follicularis]	NA	11122.5	11707.6	9729.22	37.0626	36.209	43.3531	1272.63	1660.87	660.731	2.43204e-65	7.81484e-63	yes
gene-GIB67_007686	GIB67_007686	16087	rna-gnl|WGS:JACGCM|KingUnif05367.1	GO:0005515(protein binding);GO:0005737(cytoplasm);GO:0009408(response to heat);GO:0009644(response to high light intensity);GO:0010286(heat acclimation);GO:0042542(response to hydrogen peroxide)	04141(Protein processing in endoplasmic reticulum)	K13993	NA	Alpha crystallin/Hsp20 domain [Macleaya cordata]	NA	25627.1	24334.2	20450.9	127.694	96.5548	100.438	1553.17	1519.29	803.924	3.74107e-65	1.18362e-62	yes
gene-GIB67_043146	GIB67_043146	9863	rna-gnl|WGS:JACGCM|KingUnif31457.1	GO:0005887(integral component of plasma membrane);GO:0008509(anion transmembrane transporter activity);GO:0051453(regulation of intracellular pH);GO:0098656(anion transmembrane transport)	NA	NA	NA	hypothetical protein AQUCO_00100749v1 [Aquilegia coerulea]	NA	1.74508	2.04749	2.02247	33.8145	61.2252	59.5404	0.295015	1.04622	0.666996	5.90132e-65	1.8388e-62	yes
gene-GIB67_020575	GIB67_020575	6068	rna-gnl|WGS:JACGCM|KingUnif20488.1	GO:0004672(protein kinase activity);GO:0004674(protein serine/threonine kinase activity);GO:0005524(ATP binding);GO:0005886(plasma membrane);GO:0006468(protein phosphorylation);GO:0009755(hormone-mediated signaling pathway);GO:0016021(integral component of membrane);GO:0016301(kinase activity);GO:0042803(protein homodimerization activity)	NA	NA	NA	PREDICTED: serine/threonine-protein kinase-like protein CCR4 [Juglans regia]	NA	0.882926	0.501858	1.32049	54.1495	53.4921	65.5516	2.57523	4.84668	4.32959	1.19705e-64	3.67422e-62	yes
gene-GIB67_033794	GIB67_033794	3022	rna-gnl|WGS:JACGCM|KingUnif40096.1	GO:0004674(protein serine/threonine kinase activity);GO:0005886(plasma membrane);GO:0007166(cell surface receptor signaling pathway)	NA	NA	NA	PREDICTED: putative wall-associated receptor kinase-like 16 [Nelumbo nucifera]	NA	0.212574	0.325941	0.22571	17.0944	23.2809	36.2287	0.550702	0.842295	0.435223	4.04576e-64	1.22355e-61	yes
gene-GIB67_019249	GIB67_019249	16910	rna-gnl|WGS:JACGCM|KingUnif37189.1	GO:0003677(DNA binding);GO:0003700(DNA binding transcription factor activity);GO:0005515(protein binding);GO:0005634(nucleus);GO:0006351(transcription, DNA-templated);GO:0009409(response to cold);GO:0009414(response to water deprivation);GO:0009631(cold acclimation);GO:0045893(positive regulation of transcription, DNA-templated)	NA	NA	NA	AP2/ERF domain containing protein [Trema orientale]	NA	3.16712	1.36178	1.03641	235.497	143.346	93.4811	0.833414	1.9479	1.35901	4.28305e-64	1.27653e-61	yes
gene-GIB67_027145	GIB67_027145	3928	rna-gnl|WGS:JACGCM|KingUnif30950.1	GO:0005737(cytoplasm);GO:0009408(response to heat)	04141(Protein processing in endoplasmic reticulum)	K13993	NA	PREDICTED: 17.3 kDa class II heat shock protein [Vitis vinifera]	NA	74.5163	88.9446	64.434	0.114925	0.267319	0.260039	5.21049	5.06363	2.92942	1.24534e-63	3.65863e-61	yes
gene-GIB67_021128	GIB67_021128	14277	rna-gnl|WGS:JACGCM|KingUnif33470.1	GO:0003674(molecular_function);GO:0005634(nucleus);GO:0008150(biological_process)	NA	NA	NA	PREDICTED: uncharacterized protein LOC100259819 [Vitis vinifera]	NA	180.285	98.7495	65.0609	0.777176	0.870609	1.37409	1.38942	0.561602	1.8522	4.0286e-62	1.16687e-59	yes
gene-GIB67_025434	GIB67_025434	16261	rna-gnl|WGS:JACGCM|KingUnif00764.1	GO:0005509(calcium ion binding)	04626(Plant-pathogen interaction)	K13448	NA	hypothetical protein AQUCO_03800011v1 [Aquilegia coerulea]	NA	33.0331	64.4581	52.7081	1075.56	1425.2	1167.34	30.707	46.5837	49.5796	7.14504e-62	2.0408e-59	yes
gene-GIB67_013123	GIB67_013123	8457	rna-gnl|WGS:JACGCM|KingUnif35752.1	GO:0004553(hydrolase activity, hydrolyzing O-glycosyl compounds);GO:0005576(extracellular region);GO:0005618(cell wall);GO:0010411(xyloglucan metabolic process);GO:0016762(xyloglucan:xyloglucosyl transferase activity);GO:0016798(hydrolase activity, acting on glycosyl bonds);GO:0042546(cell wall biogenesis);GO:0048046(apoplast);GO:0071555(cell wall organization)	NA	NA	NA	hypothetical protein AQUCO_02400021v1 [Aquilegia coerulea]	NA	320.643	279.364	447.834	2.67507	4.86613	4.09646	117.865	106.952	157.362	1.30204e-61	3.66801e-59	yes
gene-GIB67_019871	GIB67_019871	21907	rna-gnl|WGS:JACGCM|KingUnif09794.1	GO:0003674(molecular_function);GO:0005634(nucleus);GO:0005737(cytoplasm);GO:0008150(biological_process);GO:0016020(membrane)	NA	NA	NA	Telomere length regulation protein [Macleaya cordata]	NA	110.42	177.007	95.6901	6.30718	5.86262	5.28633	6.03573	8.61795	8.02949	3.45273e-61	9.59531e-59	yes
gene-GIB67_027136	GIB67_027136	3924	rna-gnl|WGS:JACGCM|KingUnif18114.1	GO:0005737(cytoplasm);GO:0009408(response to heat)	04141(Protein processing in endoplasmic reticulum)	K13993	NA	PREDICTED: 17.3 kDa class II heat shock protein [Vitis vinifera]	NA	5648.21	9111.5	6698.3	35.6089	42.9562	33.7235	665.318	761.267	299.824	4.9626e-61	1.36075e-58	yes
gene-GIB67_037150	GIB67_037150	19430	rna-gnl|WGS:JACGCM|KingUnif05918.1	GO:0003700(DNA binding transcription factor activity);GO:0005634(nucleus);GO:0006351(transcription, DNA-templated);GO:0006355(regulation of transcription, DNA-templated);GO:0006952(defense response);GO:0010150(leaf senescence);GO:0010200(response to chitin);GO:0043565(sequence-specific DNA binding)	04016(MAPK signaling pathway - plant);04626(Plant-pathogen interaction)	K13425	NA	WRKY transcription factor 22 [Vitis vinifera]	NA	4.39986	2.00676	3.39799	83.8579	67.6288	88.8093	3.7105	2.06816	1.91382	6.8634e-61	1.85718e-58	yes
gene-GIB67_006987	GIB67_006987	4651	rna-gnl|WGS:JACGCM|KingUnif09911.1	GO:0003700(DNA binding transcription factor activity);GO:0005634(nucleus);GO:0007275(multicellular organism development);GO:0009965(leaf morphogenesis);GO:0010200(response to chitin);GO:0045792(negative regulation of cell size);GO:0048281(inflorescence morphogenesis)	03013(RNA transport);03015(mRNA surveillance pathway);03018(RNA degradation)	K13126	NA	PREDICTED: NAC domain-containing protein 35-like [Juglans regia]	NA	6.42535	9.27566	7.22372	174.7	225.08	124.216	11.8591	8.83437	12.0708	1.22313e-60	3.2667e-58	yes
gene-GIB67_009836	GIB67_009836	33335	rna-gnl|WGS:JACGCM|KingUnif18358.1	GO:0001671(ATPase activator activity);GO:0005737(cytoplasm);GO:0051087(chaperone binding)	NA	NA	NA	Activator of Hsp90 ATPase [Macleaya cordata]	NA	1049.87	1227.25	1028.26	15.3757	16.3949	13.7244	127.525	207.907	100.428	1.45576e-60	3.83816e-58	yes
gene-GIB67_026972	GIB67_026972	3764	rna-gnl|WGS:JACGCM|KingUnif11898.1	GO:0009507(chloroplast)	NA	NA	NA	hypothetical protein AQUCO_08500013v1 [Aquilegia coerulea]	NA	0.037266	0.125669	0.263603	36.0328	28.1677	70.2747	1.9937	1.10555	1.58291	2.35707e-60	6.13583e-58	yes
gene-GIB67_014553	GIB67_014553	36872	rna-gnl|WGS:JACGCM|KingUnif14163.1	GO:0003674(molecular_function);GO:0005576(extracellular region);GO:0005615(extracellular space);GO:0005618(cell wall);GO:0005794(Golgi apparatus);GO:0005829(cytosol);GO:0009505(plant-type cell wall);GO:0009741(response to brassinosteroid);GO:0048046(apoplast)	NA	NA	NA	Phosphate-induced protein 1 [Macleaya cordata]	NA	23.5228	9.12299	16.916	380.169	288.063	350.289	13.6423	15.3353	12.9257	1.635e-59	4.20298e-57	yes
gene-GIB67_027493	GIB67_027493	23690	rna-gnl|WGS:JACGCM|KingUnif04746.1	GO:0005576(extracellular region);GO:0016042(lipid catabolic process);GO:0016787(hydrolase activity);GO:0048046(apoplast);GO:0052689(carboxylic ester hydrolase activity)	NA	NA	NA	GDSL esterase/lipase CPRD49 [Sesamum indicum]	NA	7.28703	6.03877	6.81714	1.67	2.43914	2.4406	66.4913	54.5391	48.7916	4.18677e-59	1.06297e-56	yes
gene-GIB67_027134	GIB67_027134	3927	rna-gnl|WGS:JACGCM|KingUnif29974.1	GO:0005737(cytoplasm);GO:0009408(response to heat)	04141(Protein processing in endoplasmic reticulum)	K13993	NA	PREDICTED: 17.3 kDa class II heat shock protein [Vitis vinifera]	NA	6478.03	8313.77	6445.52	41.6511	48.7928	36.3918	854.164	1058.55	406.514	7.46379e-59	1.87186e-56	yes
gene-GIB67_018717	GIB67_018717	40493	rna-gnl|WGS:JACGCM|KingUnif30297.1	GO:0000266(mitochondrial fission);GO:0003924(GTPase activity);GO:0005525(GTP binding);GO:0005737(cytoplasm);GO:0005874(microtubule);GO:0008017(microtubule binding);GO:0016020(membrane);GO:0048285(organelle fission)	NA	NA	NA	hypothetical protein AQUCO_03400152v1 [Aquilegia coerulea]	NA	18.5311	38.8576	13.5565	0.031207	0	0	0	0	0.068263	9.54573e-59	2.36516e-56	yes
gene-GIB67_003579	GIB67_003579	23847	rna-gnl|WGS:JACGCM|KingUnif23105.1	GO:0003674(molecular_function);GO:0005886(plasma membrane);GO:0009814(defense response, incompatible interaction);GO:0009863(salicylic acid mediated signaling pathway)	NA	NA	NA	NDR1/HIN1-like protein 6 [Manihot esculenta]	NA	22.7812	23.0571	39.7921	1054.97	1227.88	1549.69	80.7564	42.8079	42.8851	1.90639e-58	4.66725e-56	yes
gene-GIB67_014955	GIB67_014955	19077	rna-gnl|WGS:JACGCM|KingUnif13551.1	GO:0005509(calcium ion binding)	04626(Plant-pathogen interaction)	K13448	NA	calmodulin-like protein 3 [Durio zibethinus]	NA	12.1287	11.583	12.2744	107.741	126.82	99.7351	6.03586	8.15489	7.88389	3.41743e-58	8.26816e-56	yes
gene-GIB67_027141	GIB67_027141	3931	rna-gnl|WGS:JACGCM|KingUnif15316.1	GO:0009409(response to cold);GO:0009507(chloroplast);GO:0009522(photosystem I);GO:0009523(photosystem II);GO:0009535(chloroplast thylakoid membrane);GO:0010030(positive regulation of seed germination);GO:0010117(photoprotection);GO:0010380(regulation of chlorophyll biosynthetic process);GO:0015979(photosynthesis);GO:0016021(integral component of membrane);GO:0016168(chlorophyll binding);GO:003460…	NA	NA	NA	Chlorophyll A-B binding protein [Macleaya cordata]	NA	46.9814	39.1554	88.1888	140.987	120.811	121.702	1.28841	1.30406	1.84974	7.45272e-58	1.78215e-55	yes
gene-GIB67_011520	GIB67_011520	9042	rna-gnl|WGS:JACGCM|KingUnif11818.1	GO:0000166(nucleotide binding);GO:0003676(nucleic acid binding);GO:0005576(extracellular region);GO:0005622(intracellular);GO:0005737(cytoplasm);GO:0005829(cytosol);GO:0008408(3'-5' exonuclease activity);GO:0016021(integral component of membrane);GO:0016740(transferase activity)	NA	NA	NA	hypothetical protein POPTR_002G229000 [Populus trichocarpa]	NA	59.6217	119.663	36.3113	0.955128	0.749853	1.2506	3.50862	3.0731	2.97328	1.02783e-57	2.42958e-55	yes
gene-GIB67_007236	GIB67_007236	5364	rna-gnl|WGS:JACGCM|KingUnif24252.1	GO:0005524(ATP binding);GO:0005737(cytoplasm);GO:0009408(response to heat);GO:0009507(chloroplast);GO:0009532(plastid stroma);GO:0009570(chloroplast stroma);GO:0009658(chloroplast organization);GO:0016485(protein processing);GO:0016887(ATPase activity)	NA	NA	NA	ClpA/B family [Macleaya cordata]	NA	584.423	677.879	491.319	14.2432	14.9749	18.8103	31.6526	31.3853	22.2232	1.98448e-57	4.63759e-55	yes
gene-GIB67_042312	GIB67_042312	36375	rna-gnl|WGS:JACGCM|KingUnif33703.1	GO:0009507(chloroplast);GO:0009813(flavonoid biosynthetic process);GO:0009964(negative regulation of flavonoid biosynthetic process);GO:0016491(oxidoreductase activity);GO:0033729(anthocyanidin reductase activity);GO:0050662(coenzyme binding);GO:0055114(oxidation-reduction process)	00941(Flavonoid biosynthesis)	K13082	EC:1.1.1.219;EC:1.1.1.234	Epimerase domain-containing protein [Cephalotus follicularis]	NA	3.43816	3.39239	5.72255	594.861	425.938	401.548	98.4586	53.9241	46.494	3.88444e-57	8.97569e-55	yes
gene-GIB67_007681	GIB67_007681	16088	rna-gnl|WGS:JACGCM|KingUnif33864.1	GO:0003677(DNA binding);GO:0003723(RNA binding);GO:0003727(single-stranded RNA binding);GO:0005739(mitochondrion);GO:0008150(biological_process);GO:0008270(zinc ion binding);GO:0009507(chloroplast);GO:0043231(intracellular membrane-bounded organelle);GO:1990825(sequence-specific mRNA binding)	04141(Protein processing in endoplasmic reticulum)	K13993	NA	hypothetical protein AQUCO_02500053v1 [Aquilegia coerulea]	NA	4006.96	3628.98	3490.08	16.7508	16.993	19.4036	493.13	464.856	209.061	3.88042e-56	8.86676e-54	yes
gene-GIB67_005181	GIB67_005181	8553	rna-gnl|WGS:JACGCM|KingUnif02703.1	GO:0003674(molecular_function);GO:0005737(cytoplasm);GO:0005829(cytosol);GO:0008150(biological_process)	NA	NA	NA	PREDICTED: protein OPI10 homolog [Nelumbo nucifera]	NA	225.515	319.26	242.086	5.85367	7.4042	6.82266	40.8743	51.4025	23.2846	6.71244e-56	1.51694e-53	yes
gene-GIB67_017601	GIB67_017601	33186	rna-gnl|WGS:JACGCM|KingUnif10495.1	GO:0005737(cytoplasm)	NA	NA	NA	Protein kinase domain [Macleaya cordata]	NA	1.15746	1.13367	2.91435	166.784	122.829	228.886	7.45593	13.3422	5.46866	8.14312e-56	1.82025e-53	yes
gene-GIB67_029106	GIB67_029106	14440	rna-gnl|WGS:JACGCM|KingUnif03907.1	GO:0004674(protein serine/threonine kinase activity);GO:0005886(plasma membrane);GO:0006468(protein phosphorylation)	NA	NA	NA	probable receptor-like protein kinase At5g20050 [Hevea brasiliensis]	NA	0.088001	0.44419	0.303184	32.8193	43.3534	27.2357	1.58065	2.082	1.37314	9.27998e-56	2.05207e-53	yes
gene-GIB67_005907	GIB67_005907	24853	rna-gnl|WGS:JACGCM|KingUnif11519.1	GO:0019139(cytokinin dehydrogenase activity)	00908(Zeatin biosynthesis)	K00279	EC:1.5.99.12	hypothetical protein AQUCO_00700318v1 [Aquilegia coerulea]	NA	2.12345	0.74794	3.1324	0.0577	0.090532	0.054988	39.5462	37.8367	19.0765	9.4439e-56	2.0661e-53	yes
gene-GIB67_005174	GIB67_005174	8542	rna-gnl|WGS:JACGCM|KingUnif12330.1	GO:0004842(ubiquitin-protein transferase activity);GO:0005634(nucleus);GO:0010200(response to chitin);GO:0016567(protein ubiquitination)	NA	NA	NA	PREDICTED: U-box domain-containing protein 21-like [Nelumbo nucifera]	NA	2.30054	1.1176	5.70536	339.451	380.162	493.125	10.5459	13.9291	12.1615	1.30264e-55	2.81987e-53	yes
gene-GIB67_007364	GIB67_007364	5480	rna-gnl|WGS:JACGCM|KingUnif19337.1	GO:0003677(DNA binding);GO:0003700(DNA binding transcription factor activity);GO:0005515(protein binding);GO:0005634(nucleus);GO:0006351(transcription, DNA-templated);GO:0006355(regulation of transcription, DNA-templated);GO:0009908(flower development);GO:0043565(sequence-specific DNA binding);GO:0046872(metal ion binding);GO:0048510(regulation of timing of transition from vegetative to reproduct…	04712(Circadian rhythm - plant)	K16222	NA	Cyclic dof factor 2 [Vitis vinifera]	NA	2.37106	1.30631	1.68686	51.2487	51.5432	52.1989	15.5919	17.3465	18.8748	2.89823e-55	6.20856e-53	yes
gene-GIB67_001238	GIB67_001238	35584	rna-gnl|WGS:JACGCM|KingUnif38753.1	GO:0005739(mitochondrion);GO:0006486(protein glycosylation);GO:0009058(biosynthetic process);GO:0016021(integral component of membrane);GO:0016051(carbohydrate biosynthetic process);GO:0016740(transferase activity);GO:0016757(transferase activity, transferring glycosyl groups);GO:0016758(transferase activity, transferring hexosyl groups);GO:0046872(metal ion binding)	00500(Starch and sucrose metabolism)	K00750	EC:2.4.1.186	Glycosyl transferase [Macleaya cordata]	NA	5.18754	3.88115	6.0783	48.0389	66.7558	60.0173	4.23109	4.56235	5.17655	3.9966e-55	8.47321e-53	yes
gene-GIB67_019017	GIB67_019017	16679	rna-gnl|WGS:JACGCM|KingUnif30533.1	GO:0002679(respiratory burst involved in defense response);GO:0004842(ubiquitin-protein transferase activity);GO:0005737(cytoplasm);GO:0005829(cytosol);GO:0006952(defense response);GO:0009414(response to water deprivation);GO:0010200(response to chitin);GO:0016567(protein ubiquitination);GO:0051865(protein autoubiquitination)	NA	NA	NA	hypothetical protein AQUCO_00900692v1 [Aquilegia coerulea]	NA	0.284937	0.077097	0.448686	49.4169	35.9939	102.369	0.973437	1.6354	0.641565	4.84746e-55	1.01722e-52	yes
gene-GIB67_010252	GIB67_010252	13011	rna-gnl|WGS:JACGCM|KingUnif14168.1	GO:0003674(molecular_function);GO:0005634(nucleus)	NA	NA	NA	hypothetical protein CCACVL1_27154 [Corchorus capsularis]	NA	7.91405	9.85007	7.52398	118.078	141.597	145.898	9.68958	5.27592	8.9524	6.2953e-55	1.29534e-52	yes
gene-GIB67_026958	GIB67_026958	3741	rna-gnl|WGS:JACGCM|KingUnif05786.1	GO:0000139(Golgi membrane);GO:0000271(polysaccharide biosynthetic process);GO:0000977(RNA polymerase II regulatory region sequence-specific DNA binding);GO:0005794(Golgi apparatus);GO:0005886(plasma membrane);GO:0009833(plant-type primary cell wall biogenesis);GO:0016021(integral component of membrane);GO:0016740(transferase activity);GO:0016757(transferase activity, transferring glycosyl groups)…	NA	NA	NA	hypothetical protein AQUCO_07000023v1 [Aquilegia coerulea]	NA	0.21695	0.074281	0.266607	38.2404	43.8576	36.1929	3.92967	1.10658	2.24095	6.29875e-55	1.29534e-52	yes
gene-GIB67_042678	GIB67_042678	3664	rna-gnl|WGS:JACGCM|KingUnif01939.1	GO:0005524(ATP binding);GO:0005739(mitochondrion);GO:0005783(endoplasmic reticulum);GO:0005886(plasma membrane);GO:0009409(response to cold);GO:0009414(response to water deprivation);GO:0009651(response to salt stress);GO:0009737(response to abscisic acid);GO:0010154(fruit development);GO:0010431(seed maturation);GO:0016021(integral component of membrane);GO:0016887(ATPase activity);GO:0031966(mi…	NA	NA	NA	hypothetical protein AQUCO_00200416v1 [Aquilegia coerulea]	NA	28.1186	27.4205	25.8564	441.205	544.093	594.553	59.2815	52.9018	65.9113	1.78354e-54	3.6279e-52	yes
gene-GIB67_007138	GIB67_007138	21488	rna-gnl|WGS:JACGCM|KingUnif32488.1	GO:0000977(RNA polymerase II regulatory region sequence-specific DNA binding);GO:0005515(protein binding);GO:0005794(Golgi apparatus);GO:0005886(plasma membrane);GO:0005887(integral component of plasma membrane);GO:0009825(multidimensional cell growth);GO:0009832(plant-type cell wall biogenesis);GO:0009833(plant-type primary cell wall biogenesis);GO:0010330(cellulose synthase complex);GO:0016020(…	NA	NA	NA	Cellulose synthase [Macleaya cordata]	NA	0	0.030018	0.044101	0	0	0.03857	10.5286	5.45854	10.4546	1.7994e-54	3.6279e-52	yes
gene-GIB67_012135	GIB67_012135	13411	rna-gnl|WGS:JACGCM|KingUnif07688.1	GO:0004722(protein serine/threonine phosphatase activity);GO:0005634(nucleus);GO:0006470(protein dephosphorylation);GO:0046872(metal ion binding)	NA	NA	NA	Protein phosphatase 2C (PP2C)-like domain [Macleaya cordata]	NA	1.06023	0.383978	0.348417	35.2463	48.0145	37.2951	0.941748	0.355075	0.336133	2.04387e-54	4.08079e-52	yes
gene-GIB67_014183	GIB67_014183	12519	rna-gnl|WGS:JACGCM|KingUnif00415.1	GO:0001671(ATPase activator activity);GO:0005634(nucleus);GO:0005829(cytosol);GO:0006950(response to stress);GO:0051087(chaperone binding)	NA	NA	NA	PREDICTED: activator of 90 kDa heat shock protein ATPase homolog 1-like [Nelumbo nucifera]	NA	393.349	507.039	297.984	16.7843	15.1098	12.5856	32.3615	46.9738	26.8644	3.4342e-54	6.7908e-52	yes
gene-GIB67_013823	GIB67_013823	15407	rna-gnl|WGS:JACGCM|KingUnif34200.1	GO:0008150(biological_process)	NA	NA	NA	plant intracellular Ras-group-related LRR protein 6-like [Rosa chinensis]	NA	0.925311	1.4292	0.742581	44.2655	36.0294	46.3647	4.65077	2.99209	5.274	8.40344e-54	1.64587e-51	yes
gene-GIB67_018850	GIB67_018850	11853	rna-gnl|WGS:JACGCM|KingUnif11240.1	GO:0006508(proteolysis);GO:0008233(peptidase activity);GO:0009507(chloroplast);GO:0016021(integral component of membrane)	NA	NA	NA	CAAX amino terminal protease [Macleaya cordata]	NA	7.00839	10.8842	5.81327	55.5725	90.9587	78.0856	3.37215	3.1785	3.34419	1.37403e-53	2.66574e-51	yes
gene-GIB67_005387	GIB67_005387	10495	rna-gnl|WGS:JACGCM|KingUnif18548.1	GO:0004674(protein serine/threonine kinase activity);GO:0005886(plasma membrane);GO:0007166(cell surface receptor signaling pathway)	NA	NA	NA	PREDICTED: wall-associated receptor kinase-like 14 [Nelumbo nucifera]	NA	2.17874	1.90802	2.4129	30.945	29.554	31.3456	5.84691	4.95431	5.15485	4.64038e-53	8.91864e-51	yes
gene-GIB67_015094	GIB67_015094	34484	rna-gnl|WGS:JACGCM|KingUnif35938.1	GO:0000325(plant-type vacuole);GO:0005524(ATP binding);GO:0005773(vacuole);GO:0005774(vacuolar membrane);GO:0005794(Golgi apparatus);GO:0005886(plasma membrane);GO:0006855(drug transmembrane transport);GO:0008517(folic acid transmembrane transporter activity);GO:0008559(xenobiotic transmembrane transporting ATPase activity);GO:0009414(response to water deprivation);GO:0009506(plasmodesma);GO:0009…	02010(ABC transporters)	K05666	NA	hypothetical protein AQUCO_00300743v1 [Aquilegia coerulea]	NA	2.78029	1.92646	1.61379	53.6551	61.0129	40.5444	4.52044	2.68542	2.1426	5.3769e-53	1.02385e-50	yes
gene-GIB67_035084	GIB67_035084	1979	rna-gnl|WGS:JACGCM|KingUnif09721.1	GO:0005576(extracellular region);GO:0005615(extracellular space);GO:0009690(cytokinin metabolic process);GO:0009823(cytokinin catabolic process);GO:0016614(oxidoreductase activity, acting on CH-OH group of donors);GO:0019139(cytokinin dehydrogenase activity);GO:0050660(flavin adenine dinucleotide binding);GO:0055114(oxidation-reduction process)	00908(Zeatin biosynthesis)	K00279	EC:1.5.99.12	hypothetical protein AQUCO_00700318v1 [Aquilegia coerulea]	NA	2.27778	0.677199	4.38952	0.129928	0.220378	0.135751	72.7333	73.129	41.6238	6.74626e-53	1.27282e-50	yes
gene-GIB67_006021	GIB67_006021	24938	rna-gnl|WGS:JACGCM|KingUnif14483.1	GO:0005737(cytoplasm);GO:0009408(response to heat)	04141(Protein processing in endoplasmic reticulum)	K13993	NA	HSP20 domain-containing protein [Cephalotus follicularis]	NA	4283.25	3896.68	4251.65	22.6928	30.358	22.4454	766.006	1122.63	415.906	9.77431e-53	1.82735e-50	yes
gene-GIB67_016252	GIB67_016252	31447	rna-gnl|WGS:JACGCM|KingUnif26421.1	GO:0005634(nucleus)	NA	NA	NA	PREDICTED: heat shock factor protein HSF24-like [Nelumbo nucifera]	NA	1.38293	1.07586	1.3141	45.4986	62.1344	70.2614	13.4599	14.3571	6.6959	1.53116e-52	2.83678e-50	yes
gene-GIB67_004525	GIB67_004525	17062	rna-gnl|WGS:JACGCM|KingUnif40726.1	GO:0004553(hydrolase activity, hydrolyzing O-glycosyl compounds);GO:0005576(extracellular region);GO:0005618(cell wall);GO:0010411(xyloglucan metabolic process);GO:0016762(xyloglucan:xyloglucosyl transferase activity);GO:0016798(hydrolase activity, acting on glycosyl bonds);GO:0042546(cell wall biogenesis);GO:0048046(apoplast);GO:0071555(cell wall organization)	NA	NA	NA	hypothetical protein AQUCO_02400021v1 [Aquilegia coerulea]	NA	613.611	558.496	842.861	4.73724	9.21226	7.8372	232.631	193.675	327.786	1.61971e-52	2.97405e-50	yes
gene-GIB67_043169	GIB67_043169	9887	rna-gnl|WGS:JACGCM|KingUnif04576.1	GO:0004497(monooxygenase activity);GO:0005634(nucleus);GO:0008150(biological_process)	NA	NA	NA	hypothetical protein BVC80_521g77 [Macleaya cordata]	NA	566.093	1025.27	497.339	12.6726	14.6207	9.72321	105.392	124.123	94.1517	3.72415e-52	6.77762e-50	yes
gene-GIB67_026977	GIB67_026977	3765	rna-gnl|WGS:JACGCM|KingUnif20155.1	GO:0009507(chloroplast)	NA	NA	NA	hypothetical protein AQUCO_08500013v1 [Aquilegia coerulea]	NA	0.513541	0.267582	0.288838	80.3312	39.4957	81.5717	0.924542	2.17244	0.347043	4.39679e-52	7.93158e-50	yes
gene-GIB67_022530	GIB67_022530	38675	rna-gnl|WGS:JACGCM|KingUnif38389.1	NA	NA	NA	NA	hypothetical protein CK203_051969 [Vitis vinifera]	NA	1.16916	1.51563	1.70683	113.413	67.644	89.6489	3.9407	7.1747	8.15176	6.65923e-52	1.19084e-49	yes
gene-GIB67_022638	GIB67_022638	1484	rna-gnl|WGS:JACGCM|KingUnif42224.1	GO:0009507(chloroplast);GO:0009523(photosystem II);GO:0009535(chloroplast thylakoid membrane);GO:0009611(response to wounding);GO:0009765(photosynthesis, light harvesting);GO:0016021(integral component of membrane);GO:0016168(chlorophyll binding);GO:0071486(cellular response to high light intensity);GO:0071492(cellular response to UV-A)	NA	NA	NA	PREDICTED: stress enhanced protein 2, chloroplastic [Nelumbo nucifera]	NA	9.68619	4.24376	17.2774	515.892	427.45	458.913	19.7367	20.3267	20.8242	1.00627e-51	1.78397e-49	yes
gene-GIB67_011122	GIB67_011122	824	rna-gnl|WGS:JACGCM|KingUnif17634.1	GO:0003824(catalytic activity);GO:0005515(protein binding);GO:0005737(cytoplasm);GO:0005829(cytosol);GO:0042823(pyridoxal phosphate biosynthetic process);GO:0046982(protein heterodimerization activity)	00750(Vitamin B6 metabolism)	K06215	EC:4.3.3.6	pyridoxal 5'-phosphate synthase-like subunit PDX1.2 [Arachis ipaensis]	NA	1991.11	3554.17	1594.07	31.6932	15.268	27.3991	145.552	115.782	97.9076	1.53633e-51	2.7004e-49	yes
gene-GIB67_006384	GIB67_006384	4192	rna-gnl|WGS:JACGCM|KingUnif19985.1	GO:0003677(DNA binding);GO:0003700(DNA binding transcription factor activity);GO:0005515(protein binding);GO:0005634(nucleus);GO:0006351(transcription, DNA-templated);GO:0006355(regulation of transcription, DNA-templated);GO:0009507(chloroplast);GO:0009751(response to salicylic acid);GO:0009816(defense response to bacterium, incompatible interaction);GO:0010150(leaf senescence);GO:0010193(respons…	04626(Plant-pathogen interaction)	K16225	NA	hypothetical protein AQUCO_01300135v1 [Aquilegia coerulea]	NA	3.99317	2.82615	6.0862	113.924	137.887	185.508	7.66178	15.1164	12.6029	2.04328e-51	3.56103e-49	yes
gene-GIB67_040688	GIB67_040688	43224	rna-gnl|WGS:JACGCM|KingUnif04305.1	GO:0004674(protein serine/threonine kinase activity);GO:0005886(plasma membrane);GO:0006468(protein phosphorylation)	NA	NA	NA	PREDICTED: receptor-like serine/threonine-protein kinase At2g45590 [Nelumbo nucifera]	NA	1.0802	1.60403	2.29212	40.8327	46.5704	63.5721	3.55223	4.7419	2.3583	2.5087e-51	4.33542e-49	yes
gene-GIB67_003327	GIB67_003327	1247	rna-gnl|WGS:JACGCM|KingUnif13483.1	GO:0003676(nucleic acid binding);GO:0004527(exonuclease activity);GO:0005622(intracellular);GO:0005634(nucleus);GO:0006364(rRNA processing);GO:0008408(3'-5' exonuclease activity)	NA	NA	NA	PREDICTED: RNA exonuclease 4-like [Nelumbo nucifera]	NA	2.21081	3.02455	4.57455	66.6337	59.3538	55.4197	5.74908	7.10511	5.71927	3.05333e-51	5.23265e-49	yes
gene-GIB67_016350	GIB67_016350	25726	rna-gnl|WGS:JACGCM|KingUnif24169.1	GO:0003674(molecular_function);GO:0005634(nucleus);GO:0005739(mitochondrion);GO:0008150(biological_process)	NA	NA	NA	hypothetical protein AQUCO_01000612v1 [Aquilegia coerulea]	NA	196.57	355.103	154.579	10.0523	7.79054	9.34537	22.1982	29.9329	22.1286	4.09824e-51	6.96532e-49	yes
gene-GIB67_013788	GIB67_013788	33236	rna-gnl|WGS:JACGCM|KingUnif21102.1	GO:0008194(UDP-glycosyltransferase activity);GO:0009813(flavonoid biosynthetic process);GO:0043231(intracellular membrane-bounded organelle);GO:0052696(flavonoid glucuronidation)	00908(Zeatin biosynthesis)	K13495	EC:2.4.1.215	UDP-glucuronosyl/UDP-glucosyltransferase [Macleaya cordata]	NA	302.947	290.922	321.381	9.7451	11.4963	9.03799	84.649	116.574	54.4885	5.53547e-51	9.3309e-49	yes
gene-GIB67_038796	GIB67_038796	28717	rna-gnl|WGS:JACGCM|KingUnif17192.1	GO:0003677(DNA binding);GO:0003700(DNA binding transcription factor activity);GO:0005634(nucleus);GO:0006355(regulation of transcription, DNA-templated);GO:0048653(anther development)	NA	NA	NA	hypothetical protein AQUCO_01100114v1 [Aquilegia coerulea]	NA	16.5573	18.0294	16.8582	0.426636	0.529184	0.550718	15.0926	12.2587	20.1184	1.28493e-50	2.14835e-48	yes
gene-GIB67_021161	GIB67_021161	14310	rna-gnl|WGS:JACGCM|KingUnif32626.1	GO:0003676(nucleic acid binding);GO:0003700(DNA binding transcription factor activity);GO:0005634(nucleus);GO:0006355(regulation of transcription, DNA-templated)	NA	NA	NA	PREDICTED: uncharacterized protein LOC104604941 [Nelumbo nucifera]	NA	37.0232	31.8182	34.5155	0.32241	1.21082	0.838531	2.22737	2.26843	2.43329	2.39408e-50	3.9705e-48	yes
gene-GIB67_035825	GIB67_035825	22154	rna-gnl|WGS:JACGCM|KingUnif38939.1	GO:0003824(catalytic activity);GO:0005768(endosome);GO:0005794(Golgi apparatus);GO:0005802(trans-Golgi network);GO:0009225(nucleotide-sugar metabolic process);GO:0016021(integral component of membrane);GO:0032580(Golgi cisterna membrane);GO:0033481(galacturonate biosynthetic process);GO:0050378(UDP-glucuronate 4-epimerase activity);GO:0050829(defense response to Gram-negative bacterium);GO:005083…	00520(Amino sugar and nucleotide sugar metabolism)	K08679	EC:5.1.3.6	NAD-dependent epimerase/dehydratase [Macleaya cordata]	NA	5.18855	1.99224	5.50124	132.271	140.414	103.014	12.6408	10.5262	11.7271	3.41764e-50	5.62269e-48	yes
gene-GIB67_006049	GIB67_006049	32480	rna-gnl|WGS:JACGCM|KingUnif26592.1	GO:0003677(DNA binding);GO:0003700(DNA binding transcription factor activity);GO:0005634(nucleus);GO:0006355(regulation of transcription, DNA-templated);GO:0007623(circadian rhythm);GO:0009734(auxin-activated signaling pathway);GO:0009851(auxin biosynthetic process);GO:0010600(regulation of auxin biosynthetic process)	04712(Circadian rhythm - plant)	K12133	NA	PREDICTED: protein REVEILLE 1 [Nelumbo nucifera]	NA	2.13272	1.09624	1.4063	36.4195	37.2427	28.9235	2.61383	2.75106	3.8837	5.14941e-50	8.40457e-48	yes
gene-GIB67_025676	GIB67_025676	38289	rna-gnl|WGS:JACGCM|KingUnif19068.1	GO:0005509(calcium ion binding)	04626(Plant-pathogen interaction)	K13448	NA	unnamed protein product [Coffea canephora]	NA	9.32601	7.5884	10.4744	130.343	160.424	132.025	19.2245	20.4781	22.9491	5.22524e-50	8.46118e-48	yes
gene-GIB67_023327	GIB67_023327	11697	rna-gnl|WGS:JACGCM|KingUnif11784.1	NA	NA	NA	NA	EF-hand domain [Macleaya cordata]	NA	1.24157	3.33444	2.8759	203.802	106.176	160.075	9.48767	14.2332	13.4642	8.26033e-50	1.32714e-47	yes
gene-GIB67_029404	GIB67_029404	5064	rna-gnl|WGS:JACGCM|KingUnif19959.1	GO:0005524(ATP binding);GO:0005618(cell wall);GO:0005634(nucleus);GO:0005739(mitochondrion);GO:0005774(vacuolar membrane);GO:0005794(Golgi apparatus);GO:0005829(cytosol);GO:0005886(plasma membrane);GO:0006351(transcription, DNA-templated);GO:0006355(regulation of transcription, DNA-templated);GO:0006457(protein folding);GO:0006986(response to unfolded protein);GO:0009266(response to temperature s…	03040(Spliceosome);04141(Protein processing in endoplasmic reticulum);04144(Endocytosis)	K03283	NA	probable mediator of RNA polymerase II transcription subunit 37c isoform X1 [Papaver somniferum]	NA	515.253	792.114	481.443	14.317	17.9788	10.8413	111.157	165.653	91.3552	9.19265e-50	1.46548e-47	yes
gene-GIB67_011130	GIB67_011130	832	rna-gnl|WGS:JACGCM|KingUnif01141.1	GO:0005576(extracellular region);GO:0005768(endosome);GO:0005794(Golgi apparatus);GO:0005802(trans-Golgi network);GO:0006950(response to stress);GO:0009269(response to desiccation);GO:0009651(response to salt stress);GO:0009737(response to abscisic acid);GO:0045735(nutrient reservoir activity)	04144(Endocytosis)	K12472	NA	BURP domain [Macleaya cordata]	NA	251.453	207.866	251.27	14.5166	15.3562	23.4239	28.9501	31.2518	28.4972	1.69856e-49	2.687e-47	yes
gene-GIB67_000832	GIB67_000832	36202	rna-gnl|WGS:JACGCM|KingUnif31175.1	GO:0004674(protein serine/threonine kinase activity);GO:0005886(plasma membrane);GO:0006468(protein phosphorylation)	NA	NA	NA	hypothetical protein AQUCO_02600432v1 [Aquilegia coerulea]	NA	0.902429	1.00224	1.14167	37.398	20.6297	24.2748	28.3317	22.9021	30.8777	4.62234e-49	7.25636e-47	yes
gene-GIB67_021623	GIB67_021623	24218	rna-gnl|WGS:JACGCM|KingUnif04678.1	GO:0003723(RNA binding);GO:0005737(cytoplasm);GO:0043231(intracellular membrane-bounded organelle)	NA	NA	NA	PREDICTED: LOW QUALITY PROTEIN: uncharacterized protein LOC105043887 [Elaeis guineensis]	NA	0.30589	0.309628	0.394285	20.3999	18.9946	25.1046	2.70927	0.898962	1.40029	1.52125e-48	2.37005e-46	yes
gene-GIB67_034003	GIB67_034003	26804	rna-gnl|WGS:JACGCM|KingUnif02204.1	GO:0005634(nucleus);GO:0005737(cytoplasm);GO:0009408(response to heat);GO:0009651(response to salt stress);GO:0030544(Hsp70 protein binding)	04141(Protein processing in endoplasmic reticulum)	K09562	NA	Hsp70 nucleotide exchange factor like [Actinidia chinensis var. chinensis]	NA	1154.91	2227.42	1142.56	20.3701	30.5952	26.7086	140.447	149.041	83.4917	2.06826e-48	3.19802e-46	yes
gene-GIB67_015349	GIB67_015349	41620	rna-gnl|WGS:JACGCM|KingUnif39111.1	GO:0000024(maltose biosynthetic process);GO:0005983(starch catabolic process);GO:0009409(response to cold);GO:0009507(chloroplast);GO:0009570(chloroplast stroma);GO:0016161(beta-amylase activity);GO:0102229(amylopectin maltohydrolase activity)	00500(Starch and sucrose metabolism)	K01177	EC:3.2.1.2	Glycoside hydrolase [Macleaya cordata]	NA	48.4773	37.3837	72.8719	582.368	849.749	757.052	6.31097	9.57192	16.4679	2.48487e-48	3.81354e-46	yes
gene-GIB67_027673	GIB67_027673	9377	rna-gnl|WGS:JACGCM|KingUnif03186.1	GO:0004674(protein serine/threonine kinase activity);GO:0005886(plasma membrane)	NA	NA	NA	PREDICTED: putative serine/threonine-protein kinase [Nelumbo nucifera]	NA	0.163649	0.120924	0.250064	13.6938	14.5341	20.854	5.69644	4.50591	4.74665	2.59386e-48	3.95131e-46	yes
gene-GIB67_015157	GIB67_015157	34547	rna-gnl|WGS:JACGCM|KingUnif22613.1	GO:0004364(glutathione transferase activity);GO:0005737(cytoplasm);GO:0006749(glutathione metabolic process)	00480(Glutathione metabolism)	K00799	EC:2.5.1.18	PREDICTED: glutathione S-transferase F13 isoform X1 [Pyrus x bretschneideri]	NA	1.29508	0.792837	2.03508	297.863	359.678	351.035	279.117	321.534	83.7621	2.70454e-48	4.08962e-46	yes
gene-GIB67_020373	GIB67_020373	37174	rna-gnl|WGS:JACGCM|KingUnif37645.1	GO:0004439(phosphatidylinositol-4,5-bisphosphate 5-phosphatase activity);GO:0005634(nucleus);GO:0005737(cytoplasm);GO:0005886(plasma membrane);GO:0010305(leaf vascular tissue pattern formation);GO:0016787(hydrolase activity);GO:0034485(phosphatidylinositol-3,4,5-trisphosphate 5-phosphatase activity);GO:0046856(phosphatidylinositol dephosphorylation);GO:0071472(cellular response to salt stress);GO…	00562(Inositol phosphate metabolism);04070(Phosphatidylinositol signaling system)	K20279	EC:3.1.3.36	Inositol polyphosphate-related phosphatase [Macleaya cordata]	NA	10.4376	19.2592	8.99427	0.098643	0.050375	0.1531	0.364653	0.536879	0.662479	4.64507e-48	6.97269e-46	yes
gene-GIB67_020427	GIB67_020427	30791	rna-gnl|WGS:JACGCM|KingUnif06446.1	GO:0005515(protein binding);GO:0005524(ATP binding);GO:0005634(nucleus);GO:0005737(cytoplasm);GO:0005829(cytosol);GO:0009408(response to heat);GO:0009570(chloroplast stroma);GO:0009644(response to high light intensity);GO:0009941(chloroplast envelope);GO:0016887(ATPase activity);GO:0019538(protein metabolic process);GO:0042542(response to hydrogen peroxide);GO:0043335(protein unfolding);GO:004572…	NA	NA	NA	ClpA/B family [Macleaya cordata]	NA	1334.89	1604.09	1347.39	15.607	18.9259	10.239	476.609	538.749	355.295	4.90331e-48	7.307e-46	yes
gene-GIB67_041331	GIB67_041331	10144	rna-gnl|WGS:JACGCM|KingUnif34686.1	GO:0008194(UDP-glycosyltransferase activity);GO:0009813(flavonoid biosynthetic process);GO:0043231(intracellular membrane-bounded organelle);GO:0052696(flavonoid glucuronidation)	00908(Zeatin biosynthesis)	K13495	EC:2.4.1.215	UDP-glucuronosyl/UDP-glucosyltransferase [Macleaya cordata]	NA	910.9	972.571	948.384	16.265	17.0086	13.5828	215.389	323.171	130.67	5.18378e-48	7.66938e-46	yes
gene-GIB67_028553	GIB67_028553	42682	rna-gnl|WGS:JACGCM|KingUnif40197.1	GO:0004553(hydrolase activity, hydrolyzing O-glycosyl compounds);GO:0005576(extracellular region);GO:0005618(cell wall);GO:0005794(Golgi apparatus);GO:0010411(xyloglucan metabolic process);GO:0016762(xyloglucan:xyloglucosyl transferase activity);GO:0016798(hydrolase activity, acting on glycosyl bonds);GO:0042546(cell wall biogenesis);GO:0048046(apoplast);GO:0071555(cell wall organization)	04075(Plant hormone signal transduction)	K14504	EC:2.4.1.207	xyloglucan endotransglucosylase/hydrolase protein 22-like [Durio zibethinus]	NA	3.77913	1.48484	1.9884	71.885	59.5398	39.6745	1.34514	2.08563	1.69198	5.87756e-48	8.63371e-46	yes
gene-GIB67_032649	GIB67_032649	1184	rna-gnl|WGS:JACGCM|KingUnif04589.1	GO:0005515(protein binding);GO:0005634(nucleus);GO:0005737(cytoplasm);GO:0009631(cold acclimation);GO:0042393(histone binding);GO:0071497(cellular response to freezing);GO:1901141(regulation of lignin biosynthetic process)	04120(Ubiquitin mediated proteolysis)	K10615	EC:2.3.2.26	PREDICTED: ultraviolet-B receptor UVR8-like isoform X2 [Nelumbo nucifera]	NA	5.4958	6.91125	10.2107	44.1365	66.3152	49.8323	1.85899	1.52076	2.60066	1.13182e-47	1.65077e-45	yes
gene-GIB67_001749	GIB67_001749	6155	rna-gnl|WGS:JACGCM|KingUnif23545.1	GO:0009507(chloroplast);GO:0009813(flavonoid biosynthetic process);GO:0009964(negative regulation of flavonoid biosynthetic process);GO:0016491(oxidoreductase activity);GO:0033729(anthocyanidin reductase activity);GO:0050662(coenzyme binding);GO:0055114(oxidation-reduction process)	00941(Flavonoid biosynthesis)	K13082	EC:1.1.1.219;EC:1.1.1.234	Epimerase domain-containing protein [Cephalotus follicularis]	NA	4.8538	7.83575	5.29692	1119.4	919.416	1005.02	244.882	75.0316	92.3589	1.2794e-47	1.85288e-45	yes
gene-GIB67_024741	GIB67_024741	13295	rna-gnl|WGS:JACGCM|KingUnif26704.1	GO:0004674(protein serine/threonine kinase activity);GO:0005886(plasma membrane);GO:0007166(cell surface receptor signaling pathway)	NA	NA	NA	PREDICTED: putative wall-associated receptor kinase-like 16 [Nelumbo nucifera]	NA	4.90096	6.36939	5.86916	49.34	49.6596	63.7548	7.33207	6.77977	8.21263	2.07003e-47	2.97693e-45	yes
gene-GIB67_035937	GIB67_035937	16352	rna-gnl|WGS:JACGCM|KingUnif26776.1	GO:0005634(nucleus);GO:0009055(electron transfer activity);GO:0015035(protein disulfide oxidoreductase activity);GO:0035556(intracellular signal transduction);GO:0045454(cell redox homeostasis)	NA	NA	NA	hypothetical protein AQUCO_00201417v1 [Aquilegia coerulea]	NA	1.87968	1.9486	3.27986	55.007	86.8587	111.414	14.4334	13.0874	19.3879	2.11934e-47	3.02669e-45	yes
gene-GIB67_001069	GIB67_001069	23466	rna-gnl|WGS:JACGCM|KingUnif23955.1	GO:0003700(DNA binding transcription factor activity);GO:0005515(protein binding);GO:0005634(nucleus);GO:0006355(regulation of transcription, DNA-templated);GO:0007623(circadian rhythm);GO:0008270(zinc ion binding);GO:0048579(negative regulation of long-day photoperiodism, flowering)	04712(Circadian rhythm - plant)	K12135	NA	zinc finger protein [Macleaya cordata]	NA	7.80224	8.35497	9.81788	101.595	123.514	109.876	7.33851	14.2847	12.4267	2.93517e-47	4.16289e-45	yes
gene-GIB67_000966	GIB67_000966	23369	rna-gnl|WGS:JACGCM|KingUnif20144.1	GO:0016020(membrane);GO:0016709(oxidoreductase activity, acting on paired donors, with incorporation or reduction of molecular oxygen, NAD(P)H as one donor, and incorporation of one atom of oxygen);GO:0044550(secondary metabolite biosynthetic process)	03018(RNA degradation)	K12589	NA	hypothetical protein C5167_039048 [Papaver somniferum]	NA	7.5693	5.46694	9.82176	4.99309	5.15604	3.6471	97.1305	60.4907	65.4672	3.10054e-47	4.3673e-45	yes
gene-GIB67_010458	GIB67_010458	25281	rna-gnl|WGS:JACGCM|KingUnif35328.1	GO:0005515(protein binding);GO:0005516(calmodulin binding);GO:0005634(nucleus);GO:0009414(response to water deprivation);GO:0009651(response to salt stress);GO:0010337(regulation of salicylic acid metabolic process)	NA	NA	NA	VQ [Macleaya cordata]	NA	12.2525	9.36346	13.5704	118.022	127.99	148.816	15.8284	19.191	19.4872	4.78722e-47	6.69722e-45	yes
gene-GIB67_023204	GIB67_023204	24703	rna-gnl|WGS:JACGCM|KingUnif32088.1	GO:0005768(endosome);GO:0005794(Golgi apparatus);GO:0005802(trans-Golgi network);GO:0005886(plasma membrane);GO:0016021(integral component of membrane);GO:0048544(recognition of pollen)	NA	NA	NA	hypothetical protein AQUCO_01900013v1 [Aquilegia coerulea]	NA	1.39933	1.39533	1.10998	31.2663	27.3417	30.9772	6.49643	6.92515	6.68766	1.092e-46	1.51736e-44	yes
gene-GIB67_033780	GIB67_033780	3047	rna-gnl|WGS:JACGCM|KingUnif10273.1	GO:0005515(protein binding);GO:0005524(ATP binding);GO:0005634(nucleus);GO:0005886(plasma membrane);GO:0006952(defense response);GO:0007165(signal transduction);GO:0043531(ADP binding);GO:0043621(protein self-association);GO:0050829(defense response to Gram-negative bacterium)	04626(Plant-pathogen interaction)	K13457	NA	hypothetical protein AQUCO_01600345v1 [Aquilegia coerulea]	NA	2.88	7.46373	2.80474	57.4887	91.7152	103.071	3.11924	2.73758	3.09089	2.02403e-46	2.79357e-44	yes
gene-GIB67_011249	GIB67_011249	5990	rna-gnl|WGS:JACGCM|KingUnif10125.1	GO:0005886(plasma membrane)	NA	NA	NA	Rust resistance kinase Lr10 [Vitis vinifera]	NA	4.8032	4.41953	6.9864	165.201	130.394	98.5947	50.2006	44.6195	42.3264	2.2353e-46	3.0646e-44	yes
gene-GIB67_034612	GIB67_034612	17580	rna-gnl|WGS:JACGCM|KingUnif16374.1	GO:0051213(dioxygenase activity)	00941(Flavonoid biosynthesis)	K00475	EC:1.14.11.9	hypothetical protein AQUCO_03700280v1 [Aquilegia coerulea]	NA	1.88997	2.38982	2.47313	141.154	285.371	144.828	33.0761	10.5528	16.9975	2.53164e-46	3.44789e-44	yes
gene-GIB67_004900	GIB67_004900	33061	rna-gnl|WGS:JACGCM|KingUnif36561.1	GO:0002237(response to molecule of bacterial origin);GO:0005524(ATP binding);GO:0005739(mitochondrion);GO:0005740(mitochondrial envelope);GO:0005741(mitochondrial outer membrane);GO:0005886(plasma membrane);GO:0008219(cell death);GO:0009411(response to UV);GO:0009617(response to bacterium);GO:0009626(plant-type hypersensitive response);GO:0009863(salicylic acid mediated signaling pathway);GO:0016…	NA	NA	NA	PREDICTED: protein HYPER-SENSITIVITY-RELATED 4-like [Nelumbo nucifera]	NA	0.443234	1.16825	0.867512	25.2929	44.0059	52.3766	2.66783	1.44835	1.71404	3.19009e-46	4.31607e-44	yes
gene-GIB67_019019	GIB67_019019	16683	rna-gnl|WGS:JACGCM|KingUnif38673.1	GO:0002679(respiratory burst involved in defense response);GO:0004842(ubiquitin-protein transferase activity);GO:0005737(cytoplasm);GO:0005829(cytosol);GO:0006952(defense response);GO:0009414(response to water deprivation);GO:0010200(response to chitin);GO:0016567(protein ubiquitination);GO:0051865(protein autoubiquitination)	NA	NA	NA	hypothetical protein AQUCO_00900692v1 [Aquilegia coerulea]	NA	0.762214	0.586493	1.52794	45.7394	62.19	59.3522	2.76458	3.32822	6.5728	4.03381e-46	5.42191e-44	yes
gene-GIB67_035049	GIB67_035049	40699	rna-gnl|WGS:JACGCM|KingUnif13283.1	GO:0004674(protein serine/threonine kinase activity);GO:0005886(plasma membrane);GO:0006468(protein phosphorylation);GO:0006952(defense response);GO:0009506(plasmodesma)	NA	NA	NA	Protein kinase domain [Macleaya cordata]	NA	1.1503	0.880261	1.11036	26.4796	42.3972	27.6646	3.06982	1.70675	4.21473	4.95971e-46	6.62315e-44	yes
gene-GIB67_012725	GIB67_012725	11279	rna-gnl|WGS:JACGCM|KingUnif08727.1	GO:0005887(integral component of plasma membrane);GO:0015179(L-amino acid transmembrane transporter activity);GO:0015297(antiporter activity)	NA	NA	NA	Amino acid/polyamine transporter I [Macleaya cordata]	NA	0.609278	0.437687	0.474474	15.1639	17.9834	23.9067	0.220732	0.677393	0.836219	5.8981e-46	7.82545e-44	yes
gene-GIB67_010752	GIB67_010752	38139	rna-gnl|WGS:JACGCM|KingUnif30104.1	GO:0003677(DNA binding);GO:0003700(DNA binding transcription factor activity);GO:0005634(nucleus);GO:0006351(transcription, DNA-templated);GO:0006355(regulation of transcription, DNA-templated);GO:0009873(ethylene-activated signaling pathway);GO:0010087(phloem or xylem histogenesis);GO:0010200(response to chitin);GO:0050832(defense response to fungus);GO:0051301(cell division)	NA	NA	NA	ethylene-responsive transcription factor ERF109-like [Momordica charantia]	NA	8.17942	8.73508	8.72141	209.805	223.83	255.802	2.53395	7.86571	12.1164	1.10458e-45	1.45613e-43	yes
gene-GIB67_042717	GIB67_042717	11897	rna-gnl|WGS:JACGCM|KingUnif29753.1	NA	NA	NA	NA	uncharacterized protein LOC18782557 isoform X1 [Prunus persica]	NA	12.8785	11.4014	12.3372	14.227	16.0331	11.4745	0	0	0.084385	1.12542e-45	1.47415e-43	yes
gene-GIB67_020926	GIB67_020926	26459	rna-gnl|WGS:JACGCM|KingUnif35433.1	GO:0000302(response to reactive oxygen species);GO:0003674(molecular_function);GO:0005737(cytoplasm);GO:0005782(peroxisomal matrix);GO:0006457(protein folding);GO:0009408(response to heat)	04141(Protein processing in endoplasmic reticulum)	K13993	NA	PREDICTED: 15.7 kDa heat shock protein, peroxisomal [Nelumbo nucifera]	NA	459.708	722.078	151.232	4.82463	3.35254	3.17766	16.4781	8.82223	23.053	2.00489e-45	2.60953e-43	yes
gene-GIB67_010857	GIB67_010857	788	rna-gnl|WGS:JACGCM|KingUnif22723.1	NA	NA	NA	NA	Ribonuclease H domain [Macleaya cordata]	NA	0	0	0.086981	21.5755	16.4843	13.3583	13.3631	8.39098	6.56299	2.35781e-45	3.04959e-43	yes
gene-GIB67_006371	GIB67_006371	4181	rna-gnl|WGS:JACGCM|KingUnif41361.1	GO:0003674(molecular_function);GO:0005634(nucleus);GO:0005886(plasma membrane);GO:0008150(biological_process)	NA	NA	NA	hypothetical protein AQUCO_01300144v1 [Aquilegia coerulea]	NA	5.2741	7.93462	7.29023	97.6008	91.3487	124.143	16.8434	16.8534	17.6747	2.73128e-45	3.51055e-43	yes
gene-GIB67_024880	GIB67_024880	4915	rna-gnl|WGS:JACGCM|KingUnif00189.1	GO:0003700(DNA binding transcription factor activity);GO:0005515(protein binding);GO:0005634(nucleus);GO:0006351(transcription, DNA-templated);GO:0006355(regulation of transcription, DNA-templated);GO:0009873(ethylene-activated signaling pathway);GO:0010200(response to chitin);GO:0016036(cellular response to phosphate starvation);GO:0043565(sequence-specific DNA binding);GO:0044212(transcription …	04016(MAPK signaling pathway - plant);04626(Plant-pathogen interaction)	K13424	NA	PREDICTED: probable WRKY transcription factor 47 [Nelumbo nucifera]	NA	0.844473	0.749795	1.01942	28.2118	42.2451	38.4449	14.4921	6.77493	11.9674	4.88573e-45	6.24068e-43	yes
gene-GIB67_036935	GIB67_036935	5896	rna-gnl|WGS:JACGCM|KingUnif08989.1	GO:0005887(integral component of plasma membrane);GO:0009992(cellular water homeostasis);GO:0015250(water channel activity);GO:0015254(glycerol channel activity);GO:0034220(ion transmembrane transport)	NA	NA	NA	PREDICTED: aquaporin NIP6-1 [Nelumbo nucifera]	NA	57.408	76.3605	23.5755	1.48004	1.67842	1.90272	2.4605	3.65924	2.76189	8.28081e-45	1.0512e-42	yes
gene-GIB67_041079	GIB67_041079	34092	rna-gnl|WGS:JACGCM|KingUnif17683.1	NA	NA	NA	NA	Protein of unknown function DUF3133 [Macleaya cordata]	NA	5.7407	6.11121	9.45621	68.9037	75.5293	127.562	7.0958	7.65721	7.97288	1.0465e-44	1.32033e-42	yes
gene-GIB67_004671	GIB67_004671	2659	rna-gnl|WGS:JACGCM|KingUnif36299.1	GO:0000271(polysaccharide biosynthetic process);GO:0005794(Golgi apparatus);GO:0016757(transferase activity, transferring glycosyl groups)	NA	NA	NA	PREDICTED: probable galacturonosyltransferase-like 9 [Nelumbo nucifera]	NA	7.12211	3.44271	5.44222	63.5982	70.1666	62.5471	6.94875	5.73658	5.04337	1.7603e-44	2.20192e-42	yes
gene-GIB67_025682	GIB67_025682	38291	rna-gnl|WGS:JACGCM|KingUnif10967.1	NA	NA	NA	NA		NA	424.936	614.736	375.265	10.8939	15.9917	10.1701	122.067	112.895	58.0645	1.76667e-44	2.20192e-42	yes
gene-GIB67_025273	GIB67_025273	12645	rna-gnl|WGS:JACGCM|KingUnif40262.1	GO:0005886(plasma membrane)	NA	NA	NA	Phosphorylase superfamily protein isoform 2 [Theobroma cacao]	NA	3.04197	2.80575	3.58613	100.344	85.5414	82.8594	34.0148	18.1786	15.1301	2.56528e-44	3.17801e-42	yes
gene-GIB67_037549	GIB67_037549	12828	rna-gnl|WGS:JACGCM|KingUnif00018.1	GO:0003700(DNA binding transcription factor activity);GO:0005634(nucleus);GO:0010200(response to chitin);GO:0043565(sequence-specific DNA binding);GO:0044212(transcription regulatory region DNA binding)	NA	NA	NA	PREDICTED: zinc finger protein ZAT12-like [Fragaria vesca subsp. vesca]	NA	1.27135	3.73109	3.59135	117.542	130.119	105.46	14.5409	13.6305	19.3037	3.6359e-44	4.47738e-42	yes
gene-GIB67_034353	GIB67_034353	7345	rna-gnl|WGS:JACGCM|KingUnif13765.1	NA	NA	NA	NA	hypothetical protein BVC80_1289g123 [Macleaya cordata]	NA	485.759	686.832	395.772	29.2355	26.9419	25.5341	68.78	101.189	55.5316	6.58814e-44	8.06459e-42	yes
gene-GIB67_004319	GIB67_004319	19702	rna-gnl|WGS:JACGCM|KingUnif26501.1	GO:0005739(mitochondrion);GO:0008734(L-aspartate oxidase activity);GO:0009435(NAD biosynthetic process);GO:0009507(chloroplast);GO:0044318(L-aspartate:fumarate oxidoreductase activity);GO:0055114(oxidation-reduction process)	00250(Alanine, aspartate and glutamate metabolism);00760(Nicotinate and nicotinamide metabolism)	K00278	EC:1.4.3.16	FAD binding domain [Macleaya cordata]	NA	1.13458	1.13268	1.86048	17.915	25.0509	21.7501	1.85909	2.13747	2.30914	1.43254e-43	1.7432e-41	yes
gene-GIB67_013787	GIB67_013787	33237	rna-gnl|WGS:JACGCM|KingUnif18523.1	GO:0008194(UDP-glycosyltransferase activity);GO:0009813(flavonoid biosynthetic process);GO:0043231(intracellular membrane-bounded organelle);GO:0052696(flavonoid glucuronidation)	00908(Zeatin biosynthesis)	K13495	EC:2.4.1.215	PREDICTED: zeatin O-glucosyltransferase-like [Nelumbo nucifera]	NA	387.562	483.327	383.515	3.63486	8.85137	7.6138	76.5386	115.255	45.7191	1.84203e-43	2.22832e-41	yes
gene-GIB67_025503	GIB67_025503	34	rna-gnl|WGS:JACGCM|KingUnif10038.1	GO:0004970(ionotropic glutamate receptor activity);GO:0005217(intracellular ligand-gated ion channel activity);GO:0005515(protein binding);GO:0005634(nucleus);GO:0006811(ion transport);GO:0006874(cellular calcium ion homeostasis);GO:0009416(response to light stimulus);GO:0016021(integral component of membrane)	NA	NA	NA	hypothetical protein AQUCO_00500118v1 [Aquilegia coerulea]	NA	1.48858	1.89889	1.42057	17.7603	21.0686	18.9935	3.03064	2.57882	2.85669	2.19651e-43	2.64159e-41	yes
gene-GIB67_034548	GIB67_034548	622	rna-gnl|WGS:JACGCM|KingUnif16131.1	NA	NA	NA	NA		NA	0.881927	0.249439	1.21705	77.1613	97.1631	89.8947	6.57488	14.3029	14.5785	2.2304e-43	2.66676e-41	yes
gene-GIB67_017335	GIB67_017335	14757	rna-gnl|WGS:JACGCM|KingUnif24959.1	GO:0005515(protein binding)	NA	NA	NA	PREDICTED: serine/threonine-protein kinase At5g01020 [Vitis vinifera]	NA	2.51912	2.09588	3.98381	58.0343	89.8832	91.218	13.5451	16.09	7.84859	2.36374e-43	2.80985e-41	yes
gene-GIB67_042316	GIB67_042316	36374	rna-gnl|WGS:JACGCM|KingUnif31677.1	GO:0003677(DNA binding);GO:0003700(DNA binding transcription factor activity);GO:0003899(DNA-directed 5'-3' RNA polymerase activity);GO:0005515(protein binding);GO:0005739(mitochondrion);GO:0006352(DNA-templated transcription, initiation);GO:0006355(regulation of transcription, DNA-templated);GO:0009507(chloroplast);GO:0009553(embryo sac development);GO:0009637(response to blue light);GO:0009658(…	NA	NA	NA	RNA polymerase sigma-70 [Macleaya cordata]	NA	3.51479	6.7591	4.80587	63.7765	46.3208	56.6894	4.31705	6.3617	4.78448	5.77748e-43	6.82839e-41	yes
gene-GIB67_024539	GIB67_024539	32770	rna-gnl|WGS:JACGCM|KingUnif27728.1	GO:0003755(peptidyl-prolyl cis-trans isomerase activity);GO:0005528(FK506 binding);GO:0005789(endoplasmic reticulum membrane);GO:0061077(chaperone-mediated protein folding)	NA	NA	NA	hypothetical protein AQUCO_10800020v1 [Aquilegia coerulea]	NA	2740.44	3588.69	1972.25	66.6811	90.2843	71.1864	273.394	307	213.545	6.12854e-43	7.20191e-41	yes
gene-GIB67_007380	GIB67_007380	5499	rna-gnl|WGS:JACGCM|KingUnif04861.1	GO:0003700(DNA binding transcription factor activity);GO:0005634(nucleus);GO:0043565(sequence-specific DNA binding);GO:0044212(transcription regulatory region DNA binding)	NA	NA	NA	uncharacterized protein LOC113275941 isoform X2 [Papaver somniferum]	NA	79.4119	78.3875	116.024	5.45978	5.23276	3.34119	16.4293	9.17066	13.1165	6.29859e-43	7.35968e-41	yes
gene-GIB67_028699	GIB67_028699	13154	rna-gnl|WGS:JACGCM|KingUnif03538.1	GO:0003674(molecular_function);GO:0005576(extracellular region);GO:0031225(anchored component of membrane);GO:0051707(response to other organism)	03440(Homologous recombination)	K12173	NA	hypothetical protein AQUCO_00600208v1 [Aquilegia coerulea]	NA	8.37294	5.19573	7.41402	64.1173	71.7423	85.4479	9.12189	9.27862	7.93489	6.53503e-43	7.59281e-41	yes
gene-GIB67_009840	GIB67_009840	33327	rna-gnl|WGS:JACGCM|KingUnif29221.1	GO:0005515(protein binding);GO:0005524(ATP binding);GO:0005622(intracellular);GO:0005623(cell);GO:0005634(nucleus);GO:0005739(mitochondrion);GO:0005829(cytosol);GO:0006457(protein folding);GO:0009408(response to heat);GO:0009409(response to cold);GO:0009507(chloroplast);GO:0009532(plastid stroma);GO:0009570(chloroplast stroma);GO:0009579(thylakoid);GO:0009941(chloroplast envelope);GO:0016032(vira…	03040(Spliceosome);04141(Protein processing in endoplasmic reticulum);04144(Endocytosis)	K03283	NA	PREDICTED: stromal 70 kDa heat shock-related protein, chloroplastic [Vitis vinifera]	NA	2141.74	2926.74	1718.19	68.7538	85.8713	76.5548	257.912	192.849	199.525	6.57336e-43	7.59444e-41	yes
gene-GIB67_026884	GIB67_026884	26248	rna-gnl|WGS:JACGCM|KingUnif36854.1	GO:0004683(calmodulin-dependent protein kinase activity);GO:0005516(calmodulin binding);GO:0005634(nucleus);GO:0005737(cytoplasm);GO:0005886(plasma membrane);GO:0009738(abscisic acid-activated signaling pathway);GO:0009931(calcium-dependent protein serine/threonine kinase activity);GO:0018105(peptidyl-serine phosphorylation);GO:0035556(intracellular signal transduction);GO:0046777(protein autopho…	NA	NA	NA	Protein kinase domain [Macleaya cordata]	NA	7.36924	6.24653	7.13926	176.892	112.823	104.909	79.5595	87.3232	85.6106	6.88142e-43	7.90594e-41	yes
gene-GIB67_039585	GIB67_039585	2148	rna-gnl|WGS:JACGCM|KingUnif23801.1	GO:0003674(molecular_function);GO:0008150(biological_process)	00562(Inositol phosphate metabolism);04070(Phosphatidylinositol signaling system)	K18081	EC:3.1.3.64;EC:3.1.3.95	PREDICTED: uncharacterized protein LOC104610067 [Nelumbo nucifera]	NA	1.26902	1.63071	0.969136	24.2556	22.6936	40.1711	2.38867	3.32033	2.33027	6.92241e-43	7.90885e-41	yes
gene-GIB67_001357	GIB67_001357	18910	rna-gnl|WGS:JACGCM|KingUnif14183.1	GO:0004674(protein serine/threonine kinase activity);GO:0005886(plasma membrane);GO:0007166(cell surface receptor signaling pathway)	NA	NA	NA	hypothetical protein AQUCO_04100071v1 [Aquilegia coerulea]	NA	3.56244	4.40474	3.36655	49.1365	64.1245	57.7136	14.2156	8.38156	9.24481	7.49521e-43	8.51596e-41	yes
gene-GIB67_023170	GIB67_023170	24674	rna-gnl|WGS:JACGCM|KingUnif42709.1	GO:0003677(DNA binding);GO:0003700(DNA binding transcription factor activity);GO:0005515(protein binding);GO:0005634(nucleus);GO:0006351(transcription, DNA-templated);GO:0006355(regulation of transcription, DNA-templated);GO:0009409(response to cold);GO:0009414(response to water deprivation);GO:0009631(cold acclimation)	NA	NA	NA	PREDICTED: dehydration-responsive element-binding protein 1F-like [Nelumbo nucifera]	NA	0.872855	0.632402	0.48795	27.8666	29.8529	31.0363	0.607144	1.53071	1.06123	7.75463e-43	8.76231e-41	yes
gene-GIB67_005968	GIB67_005968	24910	rna-gnl|WGS:JACGCM|KingUnif35853.1	GO:0003674(molecular_function);GO:0005634(nucleus);GO:0008150(biological_process)	04144(Endocytosis)	K05747	NA	PREDICTED: pollen-specific leucine-rich repeat extensin-like protein 1 [Fragaria vesca subsp. vesca]	NA	0.431888	0.214095	0.639479	19.4545	15.3335	24.1393	2.78626	2.0801	1.78075	1.19805e-42	1.34633e-40	yes
gene-GIB67_042308	GIB67_042308	36362	rna-gnl|WGS:JACGCM|KingUnif23598.1	GO:0005515(protein binding);GO:0009718(anthocyanin-containing compound biosynthetic process);GO:0042406(extrinsic component of endoplasmic reticulum membrane);GO:0045552(dihydrokaempferol 4-reductase activity);GO:0047890(flavanone 4-reductase activity);GO:0050662(coenzyme binding);GO:0055114(oxidation-reduction process)	00941(Flavonoid biosynthesis)	K13082	EC:1.1.1.219;EC:1.1.1.234	Epimerase domain-containing protein [Cephalotus follicularis]	NA	10.0153	11.7374	9.37641	1272.57	1042.08	1147.71	267.976	82.3524	98.8014	1.57011e-42	1.75485e-40	yes
gene-GIB67_030033	GIB67_030033	17473	rna-gnl|WGS:JACGCM|KingUnif25554.1	GO:0003674(molecular_function);GO:0005739(mitochondrion);GO:0008150(biological_process)	00520(Amino sugar and nucleotide sugar metabolism)	K15920	EC:3.2.1.37	probable beta-D-xylosidase 5 isoform X2 [Hevea brasiliensis]	NA	0.962013	1.25942	1.99866	93.7545	52.9282	68.0753	3.31508	6.31949	4.56986	1.62788e-42	1.80959e-40	yes
gene-GIB67_013132	GIB67_013132	8454	rna-gnl|WGS:JACGCM|KingUnif07622.1	GO:0004601(peroxidase activity);GO:0005509(calcium ion binding);GO:0005515(protein binding);GO:0005634(nucleus);GO:0005794(Golgi apparatus);GO:0005886(plasma membrane);GO:0006952(defense response);GO:0007231(osmosensory signaling pathway);GO:0009408(response to heat);GO:0009611(response to wounding);GO:0016021(integral component of membrane);GO:0016174(NAD(P)H oxidase activity);GO:0033500(carbohy…	04016(MAPK signaling pathway - plant);04626(Plant-pathogen interaction)	K13447	EC:1.6.3.-;EC:1.11.1.-	Cytochrome b245 [Macleaya cordata]	NA	1.94389	1.5404	2.71221	26.9114	27.4098	61.3341	2.61515	3.50206	2.36769	5.70036e-42	6.30257e-40	yes
gene-GIB67_021677	GIB67_021677	33469	rna-gnl|WGS:JACGCM|KingUnif24373.1	GO:0003674(molecular_function);GO:0005634(nucleus);GO:0008150(biological_process)	NA	NA	NA	uncharacterized protein LOC7489727 isoform X2 [Populus trichocarpa]	NA	0	0	0.013053	1.73858	1.45918	0.900123	10.9577	3.17332	6.1053	7.63843e-42	8.40023e-40	yes
gene-GIB67_025447	GIB67_025447	16283	rna-gnl|WGS:JACGCM|KingUnif33108.1	GO:0003674(molecular_function);GO:0005634(nucleus)	NA	NA	NA	hypothetical protein AQUCO_03800016v1 [Aquilegia coerulea]	NA	4.1478	1.80257	3.52261	78.6266	59.5311	65.4358	4.27271	4.23121	6.18313	9.57219e-42	1.04709e-39	yes
gene-GIB67_040783	GIB67_040783	2833	rna-gnl|WGS:JACGCM|KingUnif10355.1	GO:0003677(DNA binding);GO:0003700(DNA binding transcription factor activity);GO:0005634(nucleus);GO:0006351(transcription, DNA-templated);GO:0006355(regulation of transcription, DNA-templated);GO:0009873(ethylene-activated signaling pathway)	NA	NA	NA	PREDICTED: ethylene-responsive transcription factor ERF017-like [Nelumbo nucifera]	NA	0.876176	0.222669	0.317144	79.9128	80.625	67.565	0.31375	2.34208	0.795748	1.05322e-41	1.146e-39	yes
gene-GIB67_033367	GIB67_033367	31131	rna-gnl|WGS:JACGCM|KingUnif31261.1	GO:0005783(endoplasmic reticulum)	03060(Protein export);04141(Protein processing in endoplasmic reticulum)	K09490	NA	hypothetical protein AQUCO_01300056v1 [Aquilegia coerulea]	NA	1196.93	913.532	1223.86	40.8619	38.8977	42.2772	187.76	186.845	107.308	1.30374e-41	1.41113e-39	yes
gene-GIB67_001536	GIB67_001536	29242	rna-gnl|WGS:JACGCM|KingUnif27749.1	GO:0004674(protein serine/threonine kinase activity);GO:0005886(plasma membrane)	NA	NA	NA	Receptor-like protein kinase [Actinidia chinensis var. chinensis]	NA	1.23578	0.885741	1.38087	27.597	25.1914	45.8416	7.67305	7.48676	6.62194	1.54548e-41	1.66402e-39	yes
gene-GIB67_000976	GIB67_000976	23384	rna-gnl|WGS:JACGCM|KingUnif43100.1	GO:0005737(cytoplasm);GO:0030001(metal ion transport);GO:0046914(transition metal ion binding);GO:0046916(cellular transition metal ion homeostasis)	NA	NA	NA	heavy metal-associated isoprenylated plant protein 7-like [Papaver somniferum]	NA	13.8473	10.2155	16.7588	237.813	243.849	180.794	44.604	29.2864	40.2557	1.72253e-41	1.84077e-39	yes
gene-GIB67_005063	GIB67_005063	21391	rna-gnl|WGS:JACGCM|KingUnif39735.1	GO:0004674(protein serine/threonine kinase activity);GO:0005886(plasma membrane);GO:0006468(protein phosphorylation)	NA	NA	NA	hypothetical protein AQUCO_02600432v1 [Aquilegia coerulea]	NA	0.492436	0.291755	0.453582	18.4979	10.8269	12.213	14.0291	9.97096	14.2219	1.72754e-41	1.84077e-39	yes
gene-GIB67_000930	GIB67_000930	23331	rna-gnl|WGS:JACGCM|KingUnif12574.1	GO:0005524(ATP binding);GO:0005886(plasma membrane);GO:0016887(ATPase activity)	NA	NA	NA	hypothetical protein AQUCO_03700184v1 [Aquilegia coerulea]	NA	7.90745	4.40514	17.3451	498.712	564.906	538.945	26.8591	41.4601	19.7525	1.78454e-41	1.8917e-39	yes
gene-GIB67_041071	GIB67_041071	34064	rna-gnl|WGS:JACGCM|KingUnif16695.1	NA	NA	NA	NA		NA	1.88245	2.10723	6.66429	137.444	174.742	178.972	10.9857	6.88657	12.9229	2.16201e-41	2.28008e-39	yes
gene-GIB67_005082	GIB67_005082	43111	rna-gnl|WGS:JACGCM|KingUnif38546.1	GO:0009813(flavonoid biosynthetic process);GO:0043231(intracellular membrane-bounded organelle);GO:0052696(flavonoid glucuronidation);GO:0080043(quercetin 3-O-glucosyltransferase activity);GO:0080044(quercetin 7-O-glucosyltransferase activity)	NA	NA	NA	UDP-glucuronosyl/UDP-glucosyltransferase [Macleaya cordata]	NA	1.79702	1.73467	1.9148	70.4463	54.6301	46.8405	42.983	46.0908	19.5965	2.5938e-41	2.72151e-39	yes
gene-GIB67_021816	GIB67_021816	1840	rna-gnl|WGS:JACGCM|KingUnif03816.1	GO:0000774(adenyl-nucleotide exchange factor activity);GO:0005507(copper ion binding);GO:0005759(mitochondrial matrix);GO:0006457(protein folding);GO:0009507(chloroplast);GO:0009570(chloroplast stroma);GO:0009579(thylakoid);GO:0009793(embryo development ending in seed dormancy);GO:0042803(protein homodimerization activity);GO:0051082(unfolded protein binding);GO:0051087(chaperone binding)	NA	NA	NA	GrpE nucleotide exchange factor [Macleaya cordata]	NA	353.276	348.5	370.591	23.7077	25.3861	21.4147	47.1849	58.0274	30.0035	3.13847e-41	3.27628e-39	yes
gene-GIB67_034321	GIB67_034321	7309	rna-gnl|WGS:JACGCM|KingUnif30343.1	GO:0005886(plasma membrane);GO:0016021(integral component of membrane);GO:0042626(ATPase activity, coupled to transmembrane movement of substances)	02010(ABC transporters)	K05681	NA	ABC transporter-like [Macleaya cordata]	NA	8.39146	6.6022	6.70435	95.1392	96.6488	151.811	13.0547	10.4944	19.0439	4.39742e-41	4.56732e-39	yes
gene-GIB67_021165	GIB67_021165	14313	rna-gnl|WGS:JACGCM|KingUnif39358.1	GO:0003700(DNA binding transcription factor activity);GO:0005634(nucleus);GO:0006355(regulation of transcription, DNA-templated);GO:0043565(sequence-specific DNA binding)	04075(Plant hormone signal transduction)	K14494	NA	scarecrow-like protein 21 [Prunus avium]	NA	3.4173	3.16481	1.86739	33.0239	49.2542	50.6668	6.94207	7.22357	7.52295	5.94931e-41	6.14812e-39	yes
gene-GIB67_018090	GIB67_018090	5699	rna-gnl|WGS:JACGCM|KingUnif37388.1	GO:0003824(catalytic activity);GO:0009809(lignin biosynthetic process);GO:0016621(cinnamoyl-CoA reductase activity);GO:0050662(coenzyme binding)	00940(Phenylpropanoid biosynthesis)	K09753	EC:1.2.1.44	cinnamoyl-CoA reductase 1-like [Papaver somniferum]	NA	16.3077	10.9363	30.3243	347.696	306.097	317.988	16.1378	6.68537	14.0954	8.24068e-41	8.47348e-39	yes
gene-GIB67_024756	GIB67_024756	13305	rna-gnl|WGS:JACGCM|KingUnif28859.1	GO:0033809(anthocyanin 6''-O-malonyltransferase activity)	00944(Flavone and flavonol biosynthesis);00943(Isoflavonoid biosynthesis)	K13264	EC:2.3.1.115	hypothetical protein AQUCO_00800032v1 [Aquilegia coerulea]	NA	2.36866	1.73026	2.20562	45.435	34.3428	26.7436	1.42169	3.25732	2.41947	1.56776e-40	1.60403e-38	yes
gene-GIB67_041077	GIB67_041077	34082	rna-gnl|WGS:JACGCM|KingUnif22815.1	GO:0005634(nucleus);GO:0005737(cytoplasm);GO:0005886(plasma membrane);GO:0007165(signal transduction);GO:0009638(phototropism);GO:0016567(protein ubiquitination)	03050(Proteasome)	K03063	NA	PREDICTED: root phototropism protein 2 [Nelumbo nucifera]	NA	5.67325	6.26814	7.68522	60.6202	49.6129	44.3753	102.762	101.741	119.201	1.73207e-40	1.76337e-38	yes
gene-GIB67_016764	GIB67_016764	29760	rna-gnl|WGS:JACGCM|KingUnif35177.1	GO:0003723(RNA binding);GO:0004525(ribonuclease III activity);GO:0005634(nucleus);GO:0005737(cytoplasm);GO:0016442(RISC complex);GO:0030422(production of siRNA involved in RNA interference)	NA	NA	NA	Ribonuclease III domain [Macleaya cordata]	NA	160.675	369.041	102.232	9.55598	8.6844	8.72402	6.91245	10.5336	7.94688	3.29198e-40	3.33496e-38	yes
gene-GIB67_036608	GIB67_036608	28783	rna-gnl|WGS:JACGCM|KingUnif06118.1	GO:0004675(transmembrane receptor protein serine/threonine kinase activity);GO:0005524(ATP binding);GO:0005634(nucleus);GO:0005886(plasma membrane);GO:0006468(protein phosphorylation);GO:0006952(defense response);GO:0007166(cell surface receptor signaling pathway);GO:0009507(chloroplast);GO:0016301(kinase activity)	NA	NA	NA	PREDICTED: probable serine/threonine-protein kinase NAK [Nelumbo nucifera]	NA	11.799	10.1313	19.8356	257.874	286.394	371.806	64.513	50.4337	53.876	3.85924e-40	3.89046e-38	yes
gene-GIB67_017951	GIB67_017951	22602	rna-gnl|WGS:JACGCM|KingUnif24362.1	GO:0003677(DNA binding);GO:0005634(nucleus);GO:0006351(transcription, DNA-templated);GO:0006355(regulation of transcription, DNA-templated);GO:0009294(DNA mediated transformation)	NA	NA	NA	PREDICTED: transcription factor GTE7-like [Nelumbo nucifera]	NA	12.318	10.6862	12.749	143.531	139.123	97.4157	21.5542	17.5961	22.064	5.92441e-40	5.9432e-38	yes
gene-GIB67_025411	GIB67_025411	37706	rna-gnl|WGS:JACGCM|KingUnif23964.1	GO:0000427(plastid-encoded plastid RNA polymerase complex);GO:0005515(protein binding);GO:0006351(transcription, DNA-templated);GO:0006355(regulation of transcription, DNA-templated);GO:0009408(response to heat);GO:0009416(response to light stimulus);GO:0009507(chloroplast);GO:0009644(response to high light intensity);GO:0009658(chloroplast organization);GO:0042542(response to hydrogen peroxide);…	04141(Protein processing in endoplasmic reticulum)	K13993	NA	small heat shock protein [Copaifera officinalis]	NA	167.674	230.968	93.1288	0.498649	0.271166	0.356726	4.01531	0.554854	0.38863	6.87311e-40	6.86143e-38	yes
gene-GIB67_034354	GIB67_034354	7344	rna-gnl|WGS:JACGCM|KingUnif14491.1	GO:0003674(molecular_function);GO:0005634(nucleus);GO:0008150(biological_process)	NA	NA	NA	unknown [Populus trichocarpa]	NA	622.647	982.854	521.771	43.6558	39.1134	45.0614	105.361	133.461	62.9961	7.28669e-40	7.23917e-38	yes
gene-GIB67_000833	GIB67_000833	36199	rna-gnl|WGS:JACGCM|KingUnif10309.1	GO:0004674(protein serine/threonine kinase activity);GO:0005886(plasma membrane);GO:0006468(protein phosphorylation)	NA	NA	NA	hypothetical protein AQUCO_00500462v1 [Aquilegia coerulea]	NA	0.66947	0.604516	0.764375	30.3056	21.5447	26.7391	19.4183	7.92807	10.5782	8.18732e-40	8.09482e-38	yes
gene-GIB67_004324	GIB67_004324	19709	rna-gnl|WGS:JACGCM|KingUnif18277.1	GO:0005634(nucleus);GO:0016874(ligase activity);GO:0080167(response to karrikin)	NA	NA	NA	PREDICTED: uncharacterized protein LOC104593196 [Nelumbo nucifera]	NA	0.980051	0.819791	4.39707	312.521	229.879	265.442	26.8697	23.6955	17.9843	2.88137e-39	2.83519e-37	yes
gene-GIB67_038126	GIB67_038126	28377	rna-gnl|WGS:JACGCM|KingUnif36254.1	GO:0003674(molecular_function);GO:0005634(nucleus);GO:0005886(plasma membrane);GO:0016021(integral component of membrane)	NA	NA	NA	PREDICTED: protein YLS9-like [Cucumis melo]	NA	2.56726	1.86207	4.44941	37.1083	33.8114	40.4484	1.75866	1.55404	1.5797	3.45956e-39	3.38789e-37	yes
gene-GIB67_042288	GIB67_042288	36348	rna-gnl|WGS:JACGCM|KingUnif14725.1	GO:0005737(cytoplasm)	NA	NA	NA	hypothetical protein AQUCO_02500092v1 [Aquilegia coerulea]	NA	3.70719	2.75906	4.44391	24.2418	26.1073	36.0523	3.42622	3.83704	3.15014	3.99248e-39	3.89125e-37	yes
gene-GIB67_032685	GIB67_032685	18010	rna-gnl|WGS:JACGCM|KingUnif11738.1	GO:0004674(protein serine/threonine kinase activity);GO:0005886(plasma membrane);GO:0006468(protein phosphorylation);GO:0006952(defense response);GO:0009506(plasmodesma)	NA	NA	NA	hypothetical protein CUMW_146020 [Citrus unshiu]	NA	1.44942	0.972489	2.10141	27.3284	26.5872	29.9668	8.36306	7.4322	5.55559	4.24236e-39	4.11529e-37	yes
gene-GIB67_027528	GIB67_027528	23722	rna-gnl|WGS:JACGCM|KingUnif25591.1	GO:0003677(DNA binding);GO:0003700(DNA binding transcription factor activity);GO:0005634(nucleus);GO:0006355(regulation of transcription, DNA-templated);GO:0046872(metal ion binding)	NA	NA	NA	PREDICTED: zinc finger CCCH domain-containing protein 66-like [Nelumbo nucifera]	NA	62.0405	40.0094	44.8443	636.681	700.905	707.185	52.7683	82.2827	81.6491	4.37413e-39	4.22319e-37	yes
gene-GIB67_043228	GIB67_043228	4795	rna-gnl|WGS:JACGCM|KingUnif22302.1	GO:0005451(monovalent cation:proton antiporter activity);GO:0006885(regulation of pH);GO:0012505(endomembrane system)	NA	NA	NA	cation/H(+) antiporter 15-like [Cajanus cajan]	NA	0.115933	0	0.129876	72.6368	26.0094	19.6047	75.821	47.8035	122.054	8.04732e-39	7.73332e-37	yes
gene-GIB67_027084	GIB67_027084	3872	rna-gnl|WGS:JACGCM|KingUnif37766.1	GO:0009409(response to cold);GO:0009507(chloroplast);GO:0009522(photosystem I);GO:0009523(photosystem II);GO:0009535(chloroplast thylakoid membrane);GO:0010030(positive regulation of seed germination);GO:0010117(photoprotection);GO:0010380(regulation of chlorophyll biosynthetic process);GO:0015979(photosynthesis);GO:0016021(integral component of membrane);GO:0016168(chlorophyll binding);GO:003460…	NA	NA	NA	putative cold-inducible protein [Camellia sinensis]	NA	27.0887	19.1223	114.161	1638.41	2696.2	3993.43	10.5226	19.5954	11.1033	1.11715e-38	1.06857e-36	yes
gene-GIB67_038542	GIB67_038542	8194	rna-gnl|WGS:JACGCM|KingUnif02376.1	GO:0003674(molecular_function);GO:0005739(mitochondrion);GO:0008150(biological_process);GO:0016020(membrane)	00564(Glycerophospholipid metabolism);00565(Ether lipid metabolism);00440(Phosphonate and phosphinate metabolism)	K00993	EC:2.7.8.1	Protein of unknown function DUF1262 [Macleaya cordata]	NA	0.144786	0.161982	0.225245	75.4283	12.2374	40.3047	2.21475	1.20201	3.16255	1.13549e-38	1.08108e-36	yes
gene-GIB67_006555	GIB67_006555	36111	rna-gnl|WGS:JACGCM|KingUnif39044.1	GO:0004674(protein serine/threonine kinase activity);GO:0005886(plasma membrane);GO:0006468(protein phosphorylation)	NA	NA	NA	G-type lectin S-receptor-like serine/threonine-protein kinase LECRK2 [Quercus suber]	NA	0.03788	0.086113	0.104394	5.93872	3.25737	4.48954	13.4568	6.91827	15.1112	1.17183e-38	1.11054e-36	yes
gene-GIB67_002485	GIB67_002485	37509	rna-gnl|WGS:JACGCM|KingUnif01132.1	GO:0003677(DNA binding);GO:0003700(DNA binding transcription factor activity);GO:0005515(protein binding);GO:0005634(nucleus);GO:0006351(transcription, DNA-templated);GO:0006355(regulation of transcription, DNA-templated);GO:0046983(protein dimerization activity)	NA	NA	NA	Basic helix-loop-helix DNA-binding superfamily protein, putative isoform 1 [Theobroma cacao]	NA	50.6815	37.6233	71.6817	0.256567	0.224244	0.657381	3.97573	14.2302	7.59963	1.37655e-38	1.29857e-36	yes
gene-GIB67_010712	GIB67_010712	38100	rna-gnl|WGS:JACGCM|KingUnif38697.1	NA	NA	NA	NA	unnamed protein product [Coffea canephora]	NA	145.358	124.906	184.31	1368.56	2104.61	1218.05	180.57	132.423	120.855	1.6117e-38	1.51345e-36	yes
gene-GIB67_037143	GIB67_037143	25877	rna-gnl|WGS:JACGCM|KingUnif04004.1	GO:0004553(hydrolase activity, hydrolyzing O-glycosyl compounds);GO:0005576(extracellular region);GO:0005618(cell wall);GO:0005794(Golgi apparatus);GO:0010411(xyloglucan metabolic process);GO:0016762(xyloglucan:xyloglucosyl transferase activity);GO:0016798(hydrolase activity, acting on glycosyl bonds);GO:0042546(cell wall biogenesis);GO:0048046(apoplast);GO:0071555(cell wall organization)	04075(Plant hormone signal transduction)	K14504	EC:2.4.1.207	PREDICTED: probable xyloglucan endotransglucosylase/hydrolase protein 23 [Vitis vinifera]	NA	9.2304	9.03232	9.35983	160.518	112.703	71.1282	3.29236	8.80538	4.18115	1.84578e-38	1.72538e-36	yes
gene-GIB67_014552	GIB67_014552	36873	rna-gnl|WGS:JACGCM|KingUnif06901.1	GO:0003674(molecular_function);GO:0005576(extracellular region);GO:0005615(extracellular space);GO:0005618(cell wall);GO:0005794(Golgi apparatus);GO:0005829(cytosol);GO:0009505(plant-type cell wall);GO:0009741(response to brassinosteroid);GO:0048046(apoplast)	NA	NA	NA	Phosphate-induced protein 1 [Macleaya cordata]	NA	29.9878	12.2765	14.8937	121.081	102.36	97.6303	4.56902	6.1582	4.41033	3.60256e-38	3.35234e-36	yes
gene-GIB67_041117	GIB67_041117	34115	rna-gnl|WGS:JACGCM|KingUnif30027.1	GO:0000156(phosphorelay response regulator activity);GO:0000160(phosphorelay signal transduction system);GO:0005634(nucleus);GO:0006351(transcription, DNA-templated);GO:0006355(regulation of transcription, DNA-templated);GO:0009736(cytokinin-activated signaling pathway)	04075(Plant hormone signal transduction)	K14492	NA	Signal transduction response regulator [Macleaya cordata]	NA	0.767642	1.00855	0.869575	25.0582	42.1204	23.7146	0.396661	0.847647	1.36956	3.93987e-38	3.64971e-36	yes
gene-GIB67_026603	GIB67_026603	38818	rna-gnl|WGS:JACGCM|KingUnif26848.1	GO:0003700(DNA binding transcription factor activity);GO:0005515(protein binding);GO:0005634(nucleus);GO:0006351(transcription, DNA-templated);GO:0006355(regulation of transcription, DNA-templated);GO:0042802(identical protein binding);GO:0043565(sequence-specific DNA binding)	NA	NA	NA	trihelix transcription factor GT-3b-like [Papaver somniferum]	NA	5.04492	7.32918	3.94828	35.4138	21.5579	27.3122	0.138364	0.295178	0.523386	4.11561e-38	3.7954e-36	yes
gene-GIB67_022013	GIB67_022013	21526	rna-gnl|WGS:JACGCM|KingUnif30909.1	GO:0003677(DNA binding);GO:0003700(DNA binding transcription factor activity);GO:0005634(nucleus);GO:0006351(transcription, DNA-templated);GO:0006355(regulation of transcription, DNA-templated);GO:0009617(response to bacterium);GO:0010200(response to chitin);GO:0042742(defense response to bacterium);GO:0043565(sequence-specific DNA binding);GO:0045893(positive regulation of transcription, DNA-tem…	04016(MAPK signaling pathway - plant);04626(Plant-pathogen interaction)	K13424	NA	PREDICTED: probable WRKY transcription factor 48 [Nelumbo nucifera]	NA	8.63845	12.3368	10.1733	76.7118	70.911	101.688	12.0117	14.354	10.0393	4.87179e-38	4.47269e-36	yes
gene-GIB67_006718	GIB67_006718	29411	rna-gnl|WGS:JACGCM|KingUnif15106.1	GO:0000103(sulfate assimilation);GO:0006457(protein folding);GO:0009507(chloroplast);GO:0015035(protein disulfide oxidoreductase activity);GO:0016671(oxidoreductase activity, acting on a sulfur group of donors, disulfide as acceptor);GO:0034599(cellular response to oxidative stress);GO:0045454(cell redox homeostasis);GO:0055114(oxidation-reduction process)	NA	NA	NA	Thioredoxin [Corchorus olitorius]	NA	30.7685	28.5761	31.4914	428.773	322.917	265.55	62.9725	66.8837	52.817	6.94346e-38	6.34632e-36	yes
gene-GIB67_033417	GIB67_033417	31184	rna-gnl|WGS:JACGCM|KingUnif39285.1	GO:0003677(DNA binding);GO:0003700(DNA binding transcription factor activity);GO:0005515(protein binding);GO:0005634(nucleus);GO:0005737(cytoplasm);GO:0006351(transcription, DNA-templated);GO:0006355(regulation of transcription, DNA-templated);GO:0010629(negative regulation of gene expression);GO:0044212(transcription regulatory region DNA binding);GO:0046983(protein dimerization activity)	04016(MAPK signaling pathway - plant);04075(Plant hormone signal transduction)	K13422	NA	Myc-type [Macleaya cordata]	NA	6.00242	7.2953	4.11308	43.3867	68.468	75.8533	6.09622	8.61269	6.35929	8.83771e-38	8.04193e-36	yes
gene-GIB67_041754	GIB67_041754	6063	rna-gnl|WGS:JACGCM|KingUnif33905.1	GO:0003674(molecular_function);GO:0005634(nucleus);GO:0005829(cytosol);GO:0005886(plasma membrane);GO:0008150(biological_process);GO:0016021(integral component of membrane)	04144(Endocytosis)	K05747	NA	hypothetical protein AQUCO_00100008v1 [Aquilegia coerulea]	NA	0.147173	0.193195	0.400872	13.4669	8.95022	16.7563	1.98031	1.66815	1.80025	8.87752e-38	8.04257e-36	yes
gene-GIB67_030354	GIB67_030354	26695	rna-gnl|WGS:JACGCM|KingUnif01576.1	GO:0005576(extracellular region);GO:0007568(aging);GO:0016021(integral component of membrane)	NA	NA	NA	hypothetical protein AQUCO_04600029v1 [Aquilegia coerulea]	NA	18.8806	18.2467	21.5353	319.04	174.629	199.066	40.1575	36.6876	43.9569	9.65129e-38	8.70521e-36	yes
gene-GIB67_019524	GIB67_019524	16538	rna-gnl|WGS:JACGCM|KingUnif31753.1	GO:0005634(nucleus);GO:0006970(response to osmotic stress);GO:0009414(response to water deprivation);GO:0009651(response to salt stress);GO:0009737(response to abscisic acid);GO:0009738(abscisic acid-activated signaling pathway);GO:0010029(regulation of seed germination);GO:0010228(vegetative to reproductive phase transition of meristem)	NA	NA	NA	PREDICTED: EID1-like F-box protein 3 [Nelumbo nucifera]	NA	5.11639	2.81509	5.19607	113.079	50.3947	48.1522	1.95443	0.74313	2.02436	9.79291e-38	8.79437e-36	yes
gene-GIB67_038609	GIB67_038609	8263	rna-gnl|WGS:JACGCM|KingUnif40398.1	GO:0009813(flavonoid biosynthetic process);GO:0043231(intracellular membrane-bounded organelle);GO:0052696(flavonoid glucuronidation);GO:0080043(quercetin 3-O-glucosyltransferase activity);GO:0080044(quercetin 7-O-glucosyltransferase activity)	NA	NA	NA	UDP-glucuronosyl/UDP-glucosyltransferase [Macleaya cordata]	NA	4.12449	6.50382	6.08173	128.194	59.7579	94.2765	10.9916	6.63983	4.73414	1.192e-37	1.06581e-35	yes
gene-GIB67_040183	GIB67_040183	18549	rna-gnl|WGS:JACGCM|KingUnif39699.1	GO:0008194(UDP-glycosyltransferase activity);GO:0009813(flavonoid biosynthetic process);GO:0043231(intracellular membrane-bounded organelle);GO:0052696(flavonoid glucuronidation)	00944(Flavone and flavonol biosynthesis)	K22771	EC:2.4.1.-	hypothetical protein AQUCO_00900214v1 [Aquilegia coerulea]	NA	4.81574	3.35038	6.8437	91.0584	62.3702	75.5841	9.98808	15.9718	10.4234	1.33533e-37	1.18879e-35	yes
gene-GIB67_001815	GIB67_001815	37142	rna-gnl|WGS:JACGCM|KingUnif40254.1	GO:0005515(protein binding);GO:0005634(nucleus);GO:0009793(embryo development ending in seed dormancy);GO:0016567(protein ubiquitination)	NA	NA	NA	PREDICTED: F-box protein SKIP28 isoform X2 [Nelumbo nucifera]	NA	1.80533	1.41223	1.52052	25.3506	29.4447	27.0065	7.1644	7.48192	5.42905	1.48747e-37	1.31852e-35	yes
gene-GIB67_025957	GIB67_025957	38363	rna-gnl|WGS:JACGCM|KingUnif34451.1	GO:0005504(fatty acid binding);GO:0006631(fatty acid metabolic process);GO:0009570(chloroplast stroma);GO:0016872(intramolecular lyase activity)	NA	NA	NA	Chalcone isomerase [Macleaya cordata]	NA	2.23348	1.92595	1.69323	26.1895	21.0162	35.9541	2.98902	4.00867	3.07392	1.79458e-37	1.58393e-35	yes
gene-GIB67_005765	GIB67_005765	42840	rna-gnl|WGS:JACGCM|KingUnif11568.1	GO:0005886(plasma membrane)	NA	NA	NA	KIP1-like [Macleaya cordata]	NA	0	0.103824	0.10125	30.5474	31.7186	20.2143	0.53173	0	0.137852	2.65567e-37	2.33392e-35	yes
gene-GIB67_005249	GIB67_005249	8613	rna-gnl|WGS:JACGCM|KingUnif29748.1	GO:0000027(ribosomal large subunit assembly);GO:0003735(structural constituent of ribosome);GO:0006412(translation);GO:0022625(cytosolic large ribosomal subunit)	03010(Ribosome)	K02866	NA	60S ribosomal protein L10 [Papaver somniferum]	NA	2.02639	2.12136	3.57903	89.1732	70.3191	114.285	20.4486	11.0222	6.97358	2.85516e-37	2.49857e-35	yes
gene-GIB67_041168	GIB67_041168	34177	rna-gnl|WGS:JACGCM|KingUnif37220.1	GO:0005634(nucleus);GO:0005737(cytoplasm)	NA	NA	NA	Armadillo [Macleaya cordata]	NA	1.13053	0.982469	1.81386	33.7244	27.8281	58.0966	8.05227	10.9208	5.99996	3.70326e-37	3.22702e-35	yes
gene-GIB67_014115	GIB67_014115	15232	rna-gnl|WGS:JACGCM|KingUnif14164.1	GO:0005634(nucleus);GO:0005737(cytoplasm)	NA	NA	NA	PREDICTED: U-box domain-containing protein 4-like [Nelumbo nucifera]	NA	14.928	11.6556	17.7337	113.719	153.426	122.69	15.0703	22.0598	20.1157	3.74017e-37	3.24543e-35	yes
gene-GIB67_006728	GIB67_006728	29423	rna-gnl|WGS:JACGCM|KingUnif39241.1	GO:0005575(cellular_component);GO:0008757(S-adenosylmethionine-dependent methyltransferase activity);GO:0010341(gibberellin carboxyl-O-methyltransferase activity);GO:0032259(methylation);GO:0046872(metal ion binding);GO:0102118(gibberellin A4 carboxyl methyltransferase activity)	NA	NA	NA	SAM dependent carboxyl methyltransferase [Macleaya cordata]	NA	10.3837	6.40567	10.9409	70.1479	69.0143	77.2783	11.7265	11.1949	10.2907	7.16123e-37	6.18785e-35	yes
gene-GIB67_007050	GIB67_007050	4714	rna-gnl|WGS:JACGCM|KingUnif28732.1	NA	NA	NA	NA		NA	71.5239	27.3858	45.2574	620.444	364.214	428.874	30.3858	26.2222	22.9605	8.46802e-37	7.2864e-35	yes
gene-GIB67_011169	GIB67_011169	25953	rna-gnl|WGS:JACGCM|KingUnif12541.1	GO:0003746(translation elongation factor activity);GO:0003924(GTPase activity);GO:0005525(GTP binding);GO:0005737(cytoplasm);GO:0005829(cytosol);GO:0005853(eukaryotic translation elongation factor 1 complex);GO:0006414(translational elongation);GO:0008340(determination of adult lifespan)	03013(RNA transport)	K03231	NA	elongation factor 1-alpha [Hylocereus polyrhizus]	NA	0	0	0	6.67947	3.16956	10.7318	0	0	0	9.86008e-37	8.44886e-35	yes
gene-GIB67_040876	GIB67_040876	38438	rna-gnl|WGS:JACGCM|KingUnif00707.1	GO:0002679(respiratory burst involved in defense response);GO:0004842(ubiquitin-protein transferase activity);GO:0005737(cytoplasm);GO:0005829(cytosol);GO:0006952(defense response);GO:0009414(response to water deprivation);GO:0010200(response to chitin);GO:0016567(protein ubiquitination);GO:0051865(protein autoubiquitination)	NA	NA	NA	hypothetical protein AQUCO_00900692v1 [Aquilegia coerulea]	NA	3.96431	4.08282	2.90942	76.8106	44.1339	138.835	12.057	12.8583	11.029	1.2087e-36	1.03141e-34	yes
gene-GIB67_032977	GIB67_032977	17208	rna-gnl|WGS:JACGCM|KingUnif09709.1	GO:0003674(molecular_function);GO:0005634(nucleus);GO:0005773(vacuole);GO:0008150(biological_process)	NA	NA	NA	Actin cross-linking [Parasponia andersonii]	NA	20.0567	17.0912	32.7341	275.905	269.568	302.63	42.1031	44.7785	41.4704	1.54851e-36	1.31591e-34	yes
gene-GIB67_019767	GIB67_019767	21808	rna-gnl|WGS:JACGCM|KingUnif23241.1	GO:0005887(integral component of plasma membrane);GO:0015179(L-amino acid transmembrane transporter activity);GO:0015203(polyamine transmembrane transporter activity);GO:0015297(antiporter activity)	03015(mRNA surveillance pathway)	K11584	NA	hypothetical protein AQUCO_00900458v1 [Aquilegia coerulea]	NA	2.38643	1.28342	2.24859	47.9968	29.5103	38.2715	6.63685	7.56984	4.59101	1.60954e-36	1.36215e-34	yes
gene-GIB67_039590	GIB67_039590	2164	rna-gnl|WGS:JACGCM|KingUnif40743.1	GO:0004867(serine-type endopeptidase inhibitor activity);GO:0005576(extracellular region);GO:0005618(cell wall);GO:0006508(proteolysis);GO:0008233(peptidase activity);GO:0009611(response to wounding);GO:0050832(defense response to fungus)	NA	NA	NA	Proteinase inhibitor I13 [Macleaya cordata]	NA	33.1706	27.0044	38.8754	34.9604	26.4529	27.4245	307.125	302.224	163.044	1.82826e-36	1.54091e-34	yes
gene-GIB67_041145	GIB67_041145	34146	rna-gnl|WGS:JACGCM|KingUnif32067.1	GO:0005516(calmodulin binding);GO:0005576(extracellular region);GO:0005886(plasma membrane);GO:0006869(lipid transport);GO:0008289(lipid binding);GO:0009505(plant-type cell wall);GO:0009534(chloroplast thylakoid);GO:0048046(apoplast);GO:0071555(cell wall organization)	NA	NA	NA	lipid transfer protein-4 [Artemisia annua]	NA	460.7	546.518	501.634	12.2147	21.3298	30.2434	382.376	316.177	253.037	2.04526e-36	1.71676e-34	yes
gene-GIB67_018682	GIB67_018682	31457	rna-gnl|WGS:JACGCM|KingUnif28920.1	GO:0005887(integral component of plasma membrane);GO:0009705(plant-type vacuole membrane);GO:0009992(cellular water homeostasis);GO:0015250(water channel activity);GO:0015254(glycerol channel activity);GO:0034220(ion transmembrane transport);GO:0042807(central vacuole)	NA	NA	NA	hypothetical protein AQUCO_00100342v1 [Aquilegia coerulea]	NA	199.029	138.846	67.0953	5.52321	5.94621	3.28574	25.2247	19.3792	23.139	2.80074e-36	2.34135e-34	yes
gene-GIB67_040355	GIB67_040355	37977	rna-gnl|WGS:JACGCM|KingUnif15831.1	GO:0005576(extracellular region);GO:0009823(cytokinin catabolic process);GO:0016491(oxidoreductase activity);GO:0016614(oxidoreductase activity, acting on CH-OH group of donors);GO:0019139(cytokinin dehydrogenase activity);GO:0050660(flavin adenine dinucleotide binding);GO:0055114(oxidation-reduction process)	00908(Zeatin biosynthesis)	K00279	EC:1.5.99.12	PREDICTED: cytokinin dehydrogenase 7 [Nelumbo nucifera]	NA	0.391024	0.289374	0.353397	18.0976	18.2597	10.3356	3.21003	2.83873	1.40047	3.11435e-36	2.59298e-34	yes
gene-GIB67_038239	GIB67_038239	7052	rna-gnl|WGS:JACGCM|KingUnif14176.1	GO:0005634(nucleus);GO:0008270(zinc ion binding);GO:0016021(integral component of membrane)	NA	NA	NA	PREDICTED: uncharacterized protein LOC104589735 [Nelumbo nucifera]	NA	1.56625	2.5659	2.90713	44.7454	36.5868	31.9345	5.57616	6.76166	4.24064	3.45357e-36	2.86382e-34	yes
gene-GIB67_013488	GIB67_013488	32235	rna-gnl|WGS:JACGCM|KingUnif24883.1	GO:0005515(protein binding);GO:0005524(ATP binding);GO:0005730(nucleolus);GO:0005737(cytoplasm);GO:0005794(Golgi apparatus);GO:0005829(cytosol);GO:0005886(plasma membrane);GO:0006457(protein folding);GO:0009408(response to heat);GO:0016020(membrane);GO:0045087(innate immune response);GO:0051082(unfolded protein binding);GO:0051131(chaperone-mediated protein complex assembly);GO:0071277(cellular r…	04141(Protein processing in endoplasmic reticulum)	K04079	NA	Heat shock protein Hsp90 [Cynara cardunculus var. scolymus]	NA	942.956	1131.36	967.189	38.3553	32.7381	20.203	333.334	460.552	221.233	3.86905e-36	3.19546e-34	yes
gene-GIB67_000835	GIB67_000835	36200	rna-gnl|WGS:JACGCM|KingUnif29342.1	GO:0005451(monovalent cation:proton antiporter activity);GO:0006885(regulation of pH);GO:0012505(endomembrane system)	NA	NA	NA	cation/H(+) antiporter 15-like [Cajanus cajan]	NA	0.115764	0	0.162577	88.8074	31.8329	24.43	91.1867	54.4699	155.571	5.11579e-36	4.19933e-34	yes
gene-GIB67_043224	GIB67_043224	4794	rna-gnl|WGS:JACGCM|KingUnif38977.1	GO:0004674(protein serine/threonine kinase activity);GO:0005886(plasma membrane);GO:0006468(protein phosphorylation)	NA	NA	NA	hypothetical protein AQUCO_00500462v1 [Aquilegia coerulea]	NA	0.395829	0.404095	0.645823	28.3708	17.8754	24.7181	18.0392	6.84479	9.77675	5.12537e-36	4.19933e-34	yes
gene-GIB67_009834	GIB67_009834	33336	rna-gnl|WGS:JACGCM|KingUnif35672.1	GO:0003700(DNA binding transcription factor activity);GO:0005634(nucleus);GO:0005773(vacuole);GO:0006355(regulation of transcription, DNA-templated)	NA	NA	NA	PREDICTED: uncharacterized protein LOC104612629 isoform X1 [Nelumbo nucifera]	NA	25.601	31.5476	29.2057	1.1329	0.981214	0.653884	8.13417	9.69545	16.6961	5.46072e-36	4.45634e-34	yes
gene-GIB67_026064	GIB67_026064	27928	rna-gnl|WGS:JACGCM|KingUnif37964.1	GO:0005507(copper ion binding);GO:0016722(oxidoreductase activity, oxidizing metal ions)	00053(Ascorbate and aldarate metabolism)	K00423	EC:1.10.3.3	hypothetical protein AQUCO_01400555v1 [Aquilegia coerulea]	NA	25.2071	43.3192	48.3209	420.45	407.914	526.055	51.4614	51.4384	51.9756	7.70771e-36	6.26518e-34	yes
gene-GIB67_012825	GIB67_012825	11377	rna-gnl|WGS:JACGCM|KingUnif19011.1	GO:0004553(hydrolase activity, hydrolyzing O-glycosyl compounds);GO:0030247(polysaccharide binding);GO:0046658(anchored component of plasma membrane)	00500(Starch and sucrose metabolism)	K19892	EC:3.2.1.39	hypothetical protein AQUCO_00400145v1 [Aquilegia coerulea]	NA	9.44346	14.5496	22.0936	251.037	157.524	240.232	23.0864	18.2395	26.6301	9.75139e-36	7.89517e-34	yes
gene-GIB67_011644	GIB67_011644	9167	rna-gnl|WGS:JACGCM|KingUnif08934.1	GO:0005737(cytoplasm)	04016(MAPK signaling pathway - plant)	K20716	NA	Protein kinase domain [Macleaya cordata]	NA	0.505455	0.203744	0.40054	24.7977	11.5673	28.2401	0.374756	1.16314	0.4313	1.0597e-35	8.54619e-34	yes
gene-GIB67_001619	GIB67_001619	40989	rna-gnl|WGS:JACGCM|KingUnif20182.1	GO:0005634(nucleus);GO:0008568(microtubule-severing ATPase activity);GO:0031122(cytoplasmic microtubule organization)	00760(Nicotinate and nicotinamide metabolism)	K00323	EC:1.6.1.2	AAA+ ATPase domain [Macleaya cordata]	NA	374.138	579.653	198.958	27.0474	18.7158	21.8044	29.3102	33.1227	23.8502	1.10177e-35	8.85076e-34	yes
gene-GIB67_037497	GIB67_037497	42217	rna-gnl|WGS:JACGCM|KingUnif24858.1	NA	NA	NA	NA	LOW QUALITY PROTEIN: LEAF RUST 10 DISEASE-RESISTANCE LOCUS RECEPTOR-LIKE PROTEIN KINASE-like 1.4 [Cicer arietinum]	NA	0.622881	0.556091	0.511294	22.7336	29.9077	33.5728	5.63192	4.33213	5.29441	1.29177e-35	1.03367e-33	yes
gene-GIB67_005894	GIB67_005894	24838	rna-gnl|WGS:JACGCM|KingUnif27648.1	GO:0005739(mitochondrion);GO:0005783(endoplasmic reticulum);GO:0005794(Golgi apparatus);GO:0009723(response to ethylene);GO:0010105(negative regulation of ethylene-activated signaling pathway)	04016(MAPK signaling pathway - plant)	K20726	NA	Protein of unknown function DUF778 [Macleaya cordata]	NA	22.8297	13.2848	31.5185	0.5866	0.970588	0.488002	31.8469	36.9466	25.2341	1.33143e-35	1.06127e-33	yes
gene-GIB67_034619	GIB67_034619	17578	rna-gnl|WGS:JACGCM|KingUnif18563.1	GO:0004970(ionotropic glutamate receptor activity);GO:0005217(intracellular ligand-gated ion channel activity);GO:0005576(extracellular region);GO:0006811(ion transport);GO:0006874(cellular calcium ion homeostasis);GO:0006883(cellular sodium ion homeostasis);GO:0009416(response to light stimulus);GO:0016021(integral component of membrane);GO:0030007(cellular potassium ion homeostasis)	NA	NA	NA	hypothetical protein AQUCO_00500118v1 [Aquilegia coerulea]	NA	5.83551	4.33249	8.7715	35.8435	48.8528	55.0313	5.05363	3.62418	3.60171	1.53053e-35	1.21527e-33	yes
gene-GIB67_020460	GIB67_020460	30826	rna-gnl|WGS:JACGCM|KingUnif33218.1	GO:0004103(choline kinase activity);GO:0005524(ATP binding);GO:0005737(cytoplasm);GO:0016310(phosphorylation)	00564(Glycerophospholipid metabolism)	K14156	EC:2.7.1.32;EC:2.7.1.82	Choline kinase [Macleaya cordata]	NA	20.2489	24.5731	31.3895	183.148	244.548	232.123	35.8	41.3548	33.1261	1.93376e-35	1.52953e-33	yes
gene-GIB67_000336	GIB67_000336	36970	rna-gnl|WGS:JACGCM|KingUnif29830.1	GO:0002239(response to oomycetes);GO:0003674(molecular_function);GO:0009506(plasmodesma);GO:0009507(chloroplast);GO:0016021(integral component of membrane);GO:0055085(transmembrane transport)	NA	NA	NA	Nodulin-like [Macleaya cordata]	NA	3.93072	1.55139	7.93894	323.046	292.57	604.68	47.3533	41.3649	30.6958	2.13633e-35	1.68328e-33	yes
gene-GIB67_031120	GIB67_031120	24009	rna-gnl|WGS:JACGCM|KingUnif15916.1	GO:0003676(nucleic acid binding);GO:0003677(DNA binding);GO:0003682(chromatin binding);GO:0003700(DNA binding transcription factor activity);GO:0005634(nucleus);GO:0006351(transcription, DNA-templated);GO:0006355(regulation of transcription, DNA-templated);GO:0008270(zinc ion binding);GO:0009651(response to salt stress);GO:0009723(response to ethylene);GO:0009733(response to auxin);GO:0009737(res…	NA	NA	NA	PREDICTED: transcription factor MYB1R1-like [Nelumbo nucifera]	NA	13.6765	7.99941	13.8224	145.304	120.499	135.082	30.9319	30.187	23.0159	2.30408e-35	1.80852e-33	yes
gene-GIB67_036782	GIB67_036782	30168	rna-gnl|WGS:JACGCM|KingUnif03897.1	GO:0005515(protein binding);GO:0005773(vacuole);GO:0005774(vacuolar membrane);GO:0006793(phosphorus metabolic process);GO:0006812(cation transport);GO:0006814(sodium ion transport);GO:0006874(cellular calcium ion homeostasis);GO:0006882(cellular zinc ion homeostasis);GO:0009624(response to nematode);GO:0009705(plant-type vacuole membrane);GO:0010351(lithium ion transport);GO:0015368(calcium:catio…	NA	NA	NA	Sodium/calcium exchanger membrane region [Macleaya cordata]	NA	6.52749	6.75524	10.9242	256.627	352.852	246.878	82.5658	32.2225	72.7414	2.62589e-35	2.05328e-33	yes
gene-GIB67_043222	GIB67_043222	4798	rna-gnl|WGS:JACGCM|KingUnif40746.1	GO:0004674(protein serine/threonine kinase activity);GO:0005886(plasma membrane);GO:0006468(protein phosphorylation)	NA	NA	NA	hypothetical protein AQUCO_00500462v1 [Aquilegia coerulea]	NA	0.581081	0.423855	0.655732	17.1264	13.4774	15.1775	12.639	6.38337	7.83433	3.83967e-35	2.99101e-33	yes
gene-GIB67_024743	GIB67_024743	13294	rna-gnl|WGS:JACGCM|KingUnif32177.1	GO:0004674(protein serine/threonine kinase activity);GO:0005886(plasma membrane);GO:0007166(cell surface receptor signaling pathway)	NA	NA	NA	PREDICTED: putative wall-associated receptor kinase-like 16 [Nelumbo nucifera]	NA	2.33967	6.89748	4.95665	180.632	194.192	204.312	33.4068	12.0613	15.9968	3.97015e-35	3.08099e-33	yes
gene-GIB67_005438	GIB67_005438	10545	rna-gnl|WGS:JACGCM|KingUnif18178.1	GO:0005739(mitochondrion);GO:0009922(fatty acid elongase activity);GO:0016021(integral component of membrane);GO:0019367(fatty acid elongation, saturated fatty acid);GO:0030148(sphingolipid biosynthetic process);GO:0030176(integral component of endoplasmic reticulum membrane);GO:0030497(fatty acid elongation);GO:0034625(fatty acid elongation, monounsaturated fatty acid);GO:0034626(fatty acid elon…	00062(Fatty acid elongation)	K10249	EC:2.3.1.199	PREDICTED: elongation of fatty acids protein 3-like [Nelumbo nucifera]	NA	1.21356	0.133664	1.70206	68.0427	71.3031	110.026	3.24224	3.38479	1.9711	4.40267e-35	3.4038e-33	yes
gene-GIB67_003015	GIB67_003015	29496	rna-gnl|WGS:JACGCM|KingUnif42789.1	GO:0045431(flavonol synthase activity)	00941(Flavonoid biosynthesis)	K05278	EC:1.14.20.6	Oxoglutarate/iron-dependent dioxygenase [Macleaya cordata]	NA	0.607705	0.451722	1.2471	60.6988	34.9711	211.751	3.93162	5.10904	5.78205	5.01774e-35	3.86479e-33	yes
gene-GIB67_000439	GIB67_000439	20317	rna-gnl|WGS:JACGCM|KingUnif21944.1	GO:0005509(calcium ion binding)	04626(Plant-pathogen interaction)	K13448	NA	probable calcium-binding protein CML18 [Papaver somniferum]	NA	27.022	31.3934	57.22	538.919	490.121	431.886	37.5725	70.0473	62.3703	5.34954e-35	4.10497e-33	yes
gene-GIB67_035414	GIB67_035414	4252	rna-gnl|WGS:JACGCM|KingUnif05964.1	GO:0000228(nuclear chromosome);GO:0000400(four-way junction DNA binding);GO:0000710(meiotic mismatch repair);GO:0003684(damaged DNA binding);GO:0007131(reciprocal meiotic recombination);GO:0009411(response to UV);GO:0032137(guanine/thymine mispair binding);GO:0032138(single base insertion or deletion binding);GO:0032301(MutSalpha complex);GO:0043570(maintenance of DNA repeat elements);GO:0045910(…	03430(Mismatch repair)	K08737	NA	DNA mismatch repair protein MutS [Macleaya cordata]	NA	7.72805	21.7178	6.46726	0.378768	0.55756	0.32258	0.472614	0.624135	0.364482	6.06915e-35	4.63985e-33	yes
gene-GIB67_024576	GIB67_024576	32807	rna-gnl|WGS:JACGCM|KingUnif34888.1	GO:0005507(copper ion binding);GO:0005524(ATP binding);GO:0005739(mitochondrion);GO:0005759(mitochondrial matrix);GO:0005774(vacuolar membrane);GO:0005794(Golgi apparatus);GO:0005829(cytosol);GO:0006458('de novo' protein folding);GO:0007005(mitochondrion organization);GO:0009408(response to heat);GO:0022626(cytosolic ribosome);GO:0042026(protein refolding);GO:0044183(protein binding involved in p…	03018(RNA degradation)	K04077	NA	PREDICTED: chaperonin CPN60-2, mitochondrial [Nelumbo nucifera]	NA	278.592	258.062	221.444	15.819	22.978	14.0956	80.9802	81.1027	63.7948	7.7698e-35	5.918e-33	yes
gene-GIB67_028552	GIB67_028552	42680	rna-gnl|WGS:JACGCM|KingUnif33349.1	GO:0004553(hydrolase activity, hydrolyzing O-glycosyl compounds);GO:0005576(extracellular region);GO:0005618(cell wall);GO:0005794(Golgi apparatus);GO:0010411(xyloglucan metabolic process);GO:0016762(xyloglucan:xyloglucosyl transferase activity);GO:0016798(hydrolase activity, acting on glycosyl bonds);GO:0042546(cell wall biogenesis);GO:0048046(apoplast);GO:0071555(cell wall organization)	04075(Plant hormone signal transduction)	K14504	EC:2.4.1.207	probable xyloglucan endotransglucosylase/hydrolase protein 23 [Hevea brasiliensis]	NA	4.12935	2.0988	6.47791	62.294	85.7202	62.4123	8.16871	8.44941	7.60988	7.95239e-35	6.03472e-33	yes
gene-GIB67_007277	GIB67_007277	5396	rna-gnl|WGS:JACGCM|KingUnif30427.1	GO:0005829(cytosol);GO:0009903(chloroplast avoidance movement);GO:0009904(chloroplast accumulation movement)	NA	NA	NA	PREDICTED: protein WEAK CHLOROPLAST MOVEMENT UNDER BLUE LIGHT-like 1 [Juglans regia]	NA	0.691435	0.609693	0.712916	12.3538	11.6631	9.78478	1.02577	0.966415	1.35091	1.30895e-34	9.89651e-33	yes
gene-GIB67_030256	GIB67_030256	20978	rna-gnl|WGS:JACGCM|KingUnif05237.1	GO:0004674(protein serine/threonine kinase activity);GO:0005515(protein binding);GO:0005524(ATP binding);GO:0005634(nucleus);GO:0005886(plasma membrane);GO:0006468(protein phosphorylation);GO:0009506(plasmodesma);GO:0009755(hormone-mediated signaling pathway);GO:0010183(pollen tube guidance);GO:0016020(membrane);GO:0016021(integral component of membrane);GO:0016301(kinase activity);GO:0090406(pol…	NA	NA	NA	PREDICTED: MDIS1-interacting receptor like kinase 2-like [Nelumbo nucifera]	NA	1.24216	1.1047	1.64803	17.5465	13.7029	27.953	4.32312	4.64966	4.4541	1.55618e-34	1.17226e-32	yes
gene-GIB67_018106	GIB67_018106	5713	rna-gnl|WGS:JACGCM|KingUnif17676.1	GO:0004674(protein serine/threonine kinase activity);GO:0005886(plasma membrane);GO:0006468(protein phosphorylation);GO:0009506(plasmodesma);GO:0031625(ubiquitin protein ligase binding);GO:0045087(innate immune response)	NA	NA	NA	G-type lectin S-receptor-like serine/threonine-protein kinase At1g11300 [Papaver somniferum]	NA	3.56958	3.56365	4.10666	32.4967	41.4485	38.5377	12.9826	11.2964	10.2088	1.68227e-34	1.26262e-32	yes
gene-GIB67_015212	GIB67_015212	19224	rna-gnl|WGS:JACGCM|KingUnif06184.1	GO:0009416(response to light stimulus);GO:0009535(chloroplast thylakoid membrane);GO:0009768(photosynthesis, light harvesting in photosystem I);GO:0009941(chloroplast envelope);GO:0010287(plastoglobule);GO:0016168(chlorophyll binding);GO:0031409(pigment binding)	00196(Photosynthesis - antenna proteins)	K08912	NA	uncharacterized protein LOC112184868 [Rosa chinensis]	NA	101.255	87.9936	61.393	10.3696	5.79802	3.60055	4.03135	3.32335	6.06572	1.7956e-34	1.34278e-32	yes
gene-GIB67_007000	GIB67_007000	4661	rna-gnl|WGS:JACGCM|KingUnif01071.1	GO:0009505(plant-type cell wall);GO:0009506(plasmodesma);GO:0016020(membrane)	NA	NA	NA	PREDICTED: expansin-like A1 [Nelumbo nucifera]	NA	2.568	3.47264	3.42211	29.324	38.6437	32.4335	3.64505	2.73884	2.93852	1.90866e-34	1.42216e-32	yes
gene-GIB67_041280	GIB67_041280	10080	rna-gnl|WGS:JACGCM|KingUnif30273.1	GO:0003959(NADPH dehydrogenase activity);GO:0005622(intracellular);GO:0055114(oxidation-reduction process)	00592(alpha-Linolenic acid metabolism)	K05894	EC:1.3.1.42	12-oxophytodienoate reductase 2-like [Quercus suber]	NA	135.802	70.4873	81.7162	27.6469	15.3496	19.4343	557.244	538.851	343.438	3.02348e-34	2.24469e-32	yes
gene-GIB67_001045	GIB67_001045	23440	rna-gnl|WGS:JACGCM|KingUnif31612.1	GO:0000139(Golgi membrane);GO:0000271(polysaccharide biosynthetic process);GO:0000977(RNA polymerase II regulatory region sequence-specific DNA binding);GO:0005783(endoplasmic reticulum);GO:0005794(Golgi apparatus);GO:0005886(plasma membrane);GO:0009832(plant-type cell wall biogenesis);GO:0009833(plant-type primary cell wall biogenesis);GO:0016021(integral component of membrane);GO:0016757(transf…	NA	NA	NA	Cellulose synthase [Macleaya cordata]	NA	12.1772	14.425	16.3732	459.137	420.866	456.432	147.567	64.6166	71.7077	3.63095e-34	2.68599e-32	yes
gene-GIB67_040445	GIB67_040445	39327	rna-gnl|WGS:JACGCM|KingUnif18302.1	GO:0005737(cytoplasm);GO:0008757(S-adenosylmethionine-dependent methyltransferase activity);GO:0032259(methylation)	NA	NA	NA	hypothetical protein AQUCO_03400290v1 [Aquilegia coerulea]	NA	4.06393	1.08297	4.76206	1.06793	0.697201	0.426278	31.8909	32.7588	38.152	3.7799e-34	2.78615e-32	yes
gene-GIB67_034139	GIB67_034139	20773	rna-gnl|WGS:JACGCM|KingUnif35601.1	GO:0005794(Golgi apparatus);GO:0008375(acetylglucosaminyltransferase activity);GO:0016757(transferase activity, transferring glycosyl groups)	00510(N-Glycan biosynthesis)	K00737	EC:2.4.1.144	Glycosyl transferase [Macleaya cordata]	NA	1.07271	0.620092	1.44444	23.8479	20.6363	13.2383	1.26235	1.24933	1.30886	4.32465e-34	3.1763e-32	yes
gene-GIB67_015891	GIB67_015891	10857	rna-gnl|WGS:JACGCM|KingUnif32400.1	GO:0004657(proline dehydrogenase activity);GO:0005739(mitochondrion);GO:0006537(glutamate biosynthetic process);GO:0006562(proline catabolic process);GO:0006970(response to osmotic stress);GO:0009414(response to water deprivation);GO:0010133(proline catabolic process to glutamate);GO:0055114(oxidation-reduction process)	00330(Arginine and proline metabolism)	K00318	EC:1.5.-.-	hypothetical protein AQUCO_00600314v1 [Aquilegia coerulea]	NA	13.7282	12.6923	14.374	131.659	123.453	108.15	20.3261	33.7541	24.6277	7.30264e-34	5.34444e-32	yes
gene-GIB67_011203	GIB67_011203	27556	rna-gnl|WGS:JACGCM|KingUnif28213.1	GO:0009416(response to light stimulus);GO:0009535(chloroplast thylakoid membrane);GO:0009768(photosynthesis, light harvesting in photosystem I);GO:0009941(chloroplast envelope);GO:0010287(plastoglobule);GO:0016168(chlorophyll binding);GO:0031409(pigment binding)	00196(Photosynthesis - antenna proteins)	K08913	NA	PREDICTED: chlorophyll a-b binding protein 151, chloroplastic [Nelumbo nucifera]	NA	1540.41	1253.5	1428.79	33.1084	82.0928	23.5017	104.248	128.824	117.698	8.85314e-34	6.4562e-32	yes
gene-GIB67_028670	GIB67_028670	18927	rna-gnl|WGS:JACGCM|KingUnif14388.1	GO:0004838(L-tyrosine:2-oxoglutarate aminotransferase activity);GO:0005737(cytoplasm);GO:0005829(cytosol);GO:0006572(tyrosine catabolic process);GO:0008483(transaminase activity);GO:0009058(biosynthetic process);GO:0010189(vitamin E biosynthetic process);GO:0030170(pyridoxal phosphate binding)	00270(Cysteine and methionine metabolism);00350(Tyrosine metabolism);00360(Phenylalanine metabolism);00400(Phenylalanine, tyrosine and tryptophan biosynthesis);00130(Ubiquinone and other terpenoid-quinone biosynthesis);00950(Isoquinoline alkaloid biosynthesis);00960(Tropane, piperidine and pyridine alkaloid biosynthesis)	K00815	EC:2.6.1.5	PREDICTED: probable aminotransferase TAT2 isoform X2 [Nelumbo nucifera]	NA	0	0	0	7.26961	15.8901	14.1612	1.3813	0.838655	0.636906	8.93724e-34	6.4945e-32	yes
gene-GIB67_036960	GIB67_036960	5925	rna-gnl|WGS:JACGCM|KingUnif27641.1	GO:0002237(response to molecule of bacterial origin);GO:0003700(DNA binding transcription factor activity);GO:0005515(protein binding);GO:0005634(nucleus);GO:0006351(transcription, DNA-templated);GO:0006355(regulation of transcription, DNA-templated);GO:0009611(response to wounding);GO:0009751(response to salicylic acid);GO:0010200(response to chitin);GO:0031347(regulation of defense response);GO…	04626(Plant-pathogen interaction)	K18835	NA	hypothetical protein AQUCO_01600214v1 [Aquilegia coerulea]	NA	6.10455	5.83641	15.3924	154.221	139.549	244.436	14.401	14.3941	21.1915	9.56495e-34	6.92617e-32	yes
gene-GIB67_034010	GIB67_034010	26810	rna-gnl|WGS:JACGCM|KingUnif09381.1	GO:0000209(protein polyubiquitination);GO:0043161(proteasome-mediated ubiquitin-dependent protein catabolic process);GO:0061630(ubiquitin protein ligase activity)	NA	NA	NA	zinc finger protein [Macleaya cordata]	NA	32.5231	20.1152	34.0355	264.138	241.583	252.803	43.6651	53.0538	40.2132	1.76898e-33	1.27646e-31	yes
gene-GIB67_041246	GIB67_041246	33443	rna-gnl|WGS:JACGCM|KingUnif42437.1	GO:0000427(plastid-encoded plastid RNA polymerase complex);GO:0005515(protein binding);GO:0006351(transcription, DNA-templated);GO:0006355(regulation of transcription, DNA-templated);GO:0009408(response to heat);GO:0009416(response to light stimulus);GO:0009507(chloroplast);GO:0009644(response to high light intensity);GO:0009658(chloroplast organization);GO:0042542(response to hydrogen peroxide);…	04141(Protein processing in endoplasmic reticulum)	K13993	NA	Small heat shock protein isoform 2 [Theobroma cacao]	NA	739.002	863.338	478.626	1.98549	1.58301	1.86526	44.1846	4.2323	5.67158	1.97136e-33	1.41752e-31	yes
gene-GIB67_027407	GIB67_027407	23601	rna-gnl|WGS:JACGCM|KingUnif15435.1	GO:0006396(RNA processing);GO:0009507(chloroplast)	NA	NA	NA	Tetratricopeptide repeat-containing domain [Macleaya cordata]	NA	2.80204	2.46164	4.87958	44.3783	42.9564	64.2827	6.85259	12.0618	7.98919	2.0119e-33	1.44163e-31	yes
gene-GIB67_005468	GIB67_005468	10572	rna-gnl|WGS:JACGCM|KingUnif22482.1	GO:0005737(cytoplasm);GO:0006898(receptor-mediated endocytosis);GO:0007015(actin filament organization);GO:0009507(chloroplast);GO:0009903(chloroplast avoidance movement);GO:0009904(chloroplast accumulation movement);GO:0030276(clathrin binding);GO:0031982(vesicle);GO:0071483(cellular response to blue light);GO:0072318(clathrin coat disassembly)	NA	NA	NA	hypothetical protein BVC80_1831g223 [Macleaya cordata]	NA	3.10121	2.50493	4.32583	60.8852	58.218	55.0351	4.76703	6.84987	13.1927	2.03201e-33	1.45098e-31	yes
gene-GIB67_026728	GIB67_026728	22813	rna-gnl|WGS:JACGCM|KingUnif22038.1	GO:0005622(intracellular);GO:0005623(cell);GO:0005829(cytosol);GO:0005886(plasma membrane);GO:0006970(response to osmotic stress);GO:0009507(chloroplast);GO:0009637(response to blue light);GO:0009738(abscisic acid-activated signaling pathway);GO:0009787(regulation of abscisic acid-activated signaling pathway);GO:0009902(chloroplast relocation);GO:0009903(chloroplast avoidance movement);GO:0010029…	NA	NA	NA	hypothetical protein AQUCO_01500275v1 [Aquilegia coerulea]	NA	8.28266	5.00049	7.54371	61.6179	73.4451	65.7407	14.1611	16.9925	18.7454	2.19205e-33	1.55984e-31	yes
gene-GIB67_035336	GIB67_035336	29604	rna-gnl|WGS:JACGCM|KingUnif21171.1	GO:0016787(hydrolase activity)	NA	NA	NA	PREDICTED: probable esterase D14L [Nelumbo nucifera]	NA	14.1772	8.49682	13.4239	137.818	174.406	155.22	47.8942	57.7594	35.493	2.54802e-33	1.8069e-31	yes
gene-GIB67_011170	GIB67_011170	12396	rna-gnl|WGS:JACGCM|KingUnif37081.1	GO:0004674(protein serine/threonine kinase activity);GO:0005524(ATP binding);GO:0005886(plasma membrane);GO:0006468(protein phosphorylation);GO:0007169(transmembrane receptor protein tyrosine kinase signaling pathway);GO:0009507(chloroplast);GO:0009755(hormone-mediated signaling pathway);GO:0016301(kinase activity)	NA	NA	NA	probable LRR receptor-like serine/threonine-protein kinase At1g06840 [Papaver somniferum]	NA	40.6043	58.5215	32.1741	3.55416	2.98148	3.1425	15.785	16.9744	20.1387	2.7306e-33	1.92972e-31	yes
gene-GIB67_025962	GIB67_025962	38378	rna-gnl|WGS:JACGCM|KingUnif26184.1	GO:0009416(response to light stimulus);GO:0009813(flavonoid biosynthetic process);GO:0045486(naringenin 3-dioxygenase activity)	00941(Flavonoid biosynthesis)	K00475	EC:1.14.11.9	naringenin,2-oxoglutarate 3-dioxygenase [Ziziphus jujuba]	NA	54.0328	55.2257	80.2549	26.218	22.9656	12.6584	428.94	631.813	265.657	3.07275e-33	2.16408e-31	yes
gene-GIB67_017376	GIB67_017376	15460	rna-gnl|WGS:JACGCM|KingUnif34765.1	GO:0005515(protein binding);GO:0005524(ATP binding);GO:0005730(nucleolus);GO:0005737(cytoplasm);GO:0005794(Golgi apparatus);GO:0005829(cytosol);GO:0005886(plasma membrane);GO:0006457(protein folding);GO:0009408(response to heat);GO:0016020(membrane);GO:0045087(innate immune response);GO:0051082(unfolded protein binding);GO:0051131(chaperone-mediated protein complex assembly);GO:0071277(cellular r…	04141(Protein processing in endoplasmic reticulum)	K04079	NA	Heat shock protein Hsp90 [Cynara cardunculus var. scolymus]	NA	1569.04	1813.08	1567.28	66.7239	68.4157	48.0888	560.56	809.202	386.462	3.20292e-33	2.24806e-31	yes
gene-GIB67_032121	GIB67_032121	17738	rna-gnl|WGS:JACGCM|KingUnif05911.1	NA	NA	NA	NA		NA	0	0	0	0	0	0	3.14356	1.62319	5.29092	3.85723e-33	2.69463e-31	yes
gene-GIB67_031029	GIB67_031029	10938	rna-gnl|WGS:JACGCM|KingUnif12680.1	GO:0003677(DNA binding);GO:0003700(DNA binding transcription factor activity);GO:0005634(nucleus);GO:0006351(transcription, DNA-templated);GO:0006355(regulation of transcription, DNA-templated);GO:0007389(pattern specification process);GO:0009734(auxin-activated signaling pathway);GO:0009738(abscisic acid-activated signaling pathway);GO:0009743(response to carbohydrate);GO:0010154(fruit developme…	04075(Plant hormone signal transduction)	K14486	NA	PREDICTED: auxin response factor 18-like [Nelumbo nucifera]	NA	7.25506	4.2208	4.41968	58.1524	51.9978	54.8174	12.3938	17.2228	13.7713	3.86538e-33	2.69463e-31	yes
gene-GIB67_038891	GIB67_038891	28080	rna-gnl|WGS:JACGCM|KingUnif20991.1	GO:0003677(DNA binding);GO:0003700(DNA binding transcription factor activity);GO:0005515(protein binding);GO:0005634(nucleus);GO:0006351(transcription, DNA-templated);GO:0006355(regulation of transcription, DNA-templated);GO:0006970(response to osmotic stress);GO:0009409(response to cold);GO:0009414(response to water deprivation);GO:0009416(response to light stimulus);GO:0009611(response to wound…	NA	NA	NA	LOW QUALITY PROTEIN: ethylene-responsive transcription factor RAP2-13 [Populus trichocarpa]	NA	27.5546	35.1543	29.5758	289.929	221.9	237.605	46.2485	28.1835	44.5649	4.80065e-33	3.33532e-31	yes
gene-GIB67_016079	GIB67_016079	40595	rna-gnl|WGS:JACGCM|KingUnif31009.1	GO:0003723(RNA binding);GO:0004519(endonuclease activity);GO:0006397(mRNA processing);GO:0008270(zinc ion binding);GO:0009451(RNA modification);GO:0009507(chloroplast);GO:0031425(chloroplast RNA processing)	NA	NA	NA	Pentatricopeptide repeat [Macleaya cordata]	NA	59.7603	180.33	24.5995	0.832773	1.06617	1.23993	6.3969	6.86205	4.27992	4.9875e-33	3.45347e-31	yes
gene-GIB67_025430	GIB67_025430	16255	rna-gnl|WGS:JACGCM|KingUnif26048.1	GO:0004674(protein serine/threonine kinase activity);GO:0005886(plasma membrane);GO:0006468(protein phosphorylation);GO:0006952(defense response);GO:0009506(plasmodesma)	NA	NA	NA	Protein kinase domain [Macleaya cordata]	NA	1.50069	0.629101	1.72689	31.8133	80.667	87.5428	12.2554	5.7016	11.9264	6.37347e-33	4.39834e-31	yes
gene-GIB67_012640	GIB67_012640	11194	rna-gnl|WGS:JACGCM|KingUnif33208.1	GO:0005634(nucleus);GO:0006355(regulation of transcription, DNA-templated)	NA	NA	NA	hypothetical protein BVC80_1211g54 [Macleaya cordata]	NA	67.3584	25.1683	78.9339	1.32069	1.45037	0.956498	30.3333	18.9875	36.4839	6.4921e-33	4.46522e-31	yes
gene-GIB67_038058	GIB67_038058	13435	rna-gnl|WGS:JACGCM|KingUnif18672.1	GO:0004089(carbonate dehydratase activity);GO:0005886(plasma membrane);GO:0008270(zinc ion binding);GO:0009409(response to cold);GO:0009507(chloroplast);GO:0009535(chloroplast thylakoid membrane);GO:0009570(chloroplast stroma);GO:0009579(thylakoid);GO:0009817(defense response to fungus, incompatible interaction);GO:0009941(chloroplast envelope);GO:0010037(response to carbon dioxide);GO:0010119(re…	00910(Nitrogen metabolism)	K01673	EC:4.2.1.1	PREDICTED: carbonic anhydrase, chloroplastic-like [Erythranthe guttata]	NA	12.5633	12.6627	16.7532	0.519273	0.950655	0.43834	26.8755	37.5437	15.8343	6.69437e-33	4.58899e-31	yes
gene-GIB67_000529	GIB67_000529	22500	rna-gnl|WGS:JACGCM|KingUnif02468.1	GO:0003674(molecular_function);GO:0008150(biological_process)	NA	NA	NA	Ran-interacting Mog1 protein [Macleaya cordata]	NA	283.291	211.651	130.684	17.1051	10.2237	9.51123	29.2541	26.5075	44.5514	6.79577e-33	4.64302e-31	yes
gene-GIB67_033725	GIB67_033725	2970	rna-gnl|WGS:JACGCM|KingUnif12299.1	GO:0004674(protein serine/threonine kinase activity);GO:0005886(plasma membrane);GO:0006468(protein phosphorylation)	NA	NA	NA	Protein kinase domain [Macleaya cordata]	NA	11.5146	11.271	13.2676	83.9674	81.7771	88.6876	14.2051	13.0923	7.15278	7.90661e-33	5.38408e-31	yes
gene-GIB67_000771	GIB67_000771	12144	rna-gnl|WGS:JACGCM|KingUnif37509.1	GO:0003723(RNA binding);GO:0004519(endonuclease activity);GO:0005515(protein binding);GO:0005524(ATP binding);GO:0005739(mitochondrion);GO:0006349(regulation of gene expression by genetic imprinting);GO:0009451(RNA modification);GO:0009507(chloroplast);GO:0009793(embryo development ending in seed dormancy);GO:0009960(endosperm development)	NA	NA	NA	hypothetical protein VITISV_040755 [Vitis vinifera]	NA	0	0	0	6.3213	6.98614	5.64383	0.071197	0	0	8.17724e-33	5.55e-31	yes
gene-GIB67_007381	GIB67_007381	5500	rna-gnl|WGS:JACGCM|KingUnif24145.1	GO:0003700(DNA binding transcription factor activity);GO:0005634(nucleus);GO:0043565(sequence-specific DNA binding);GO:0044212(transcription regulatory region DNA binding)	NA	NA	NA	uncharacterized protein LOC8277419 [Ricinus communis]	NA	24.6099	22.2938	32.9157	1.12069	0.70886	0.303589	2.02438	1.82854	2.36772	8.78273e-33	5.94135e-31	yes
gene-GIB67_010031	GIB67_010031	42935	rna-gnl|WGS:JACGCM|KingUnif33247.1	GO:0005432(calcium:sodium antiporter activity);GO:0006812(cation transport);GO:0006813(potassium ion transport);GO:0006814(sodium ion transport);GO:0015297(antiporter activity);GO:0015491(cation:cation antiporter activity);GO:0016021(integral component of membrane);GO:0055085(transmembrane transport)	NA	NA	NA	hypothetical protein AQUCO_00900546v1 [Aquilegia coerulea]	NA	10.1003	7.5362	12.4964	74.8802	68.6532	67.7888	13.2159	14.8054	12.7238	1.51397e-32	1.02082e-30	yes
gene-GIB67_035349	GIB67_035349	20159	rna-gnl|WGS:JACGCM|KingUnif38963.1	GO:0003674(molecular_function);GO:0005576(extracellular region);GO:0005615(extracellular space);GO:0005618(cell wall);GO:0005794(Golgi apparatus);GO:0005829(cytosol);GO:0009505(plant-type cell wall);GO:0009741(response to brassinosteroid);GO:0048046(apoplast)	NA	NA	NA	Phosphate-induced protein 1 [Macleaya cordata]	NA	25.2771	10.1451	12.7895	83.9623	71.2619	59.1313	3.11302	4.35676	3.10539	1.68282e-32	1.13095e-30	yes
gene-GIB67_007754	GIB67_007754	16160	rna-gnl|WGS:JACGCM|KingUnif17932.1	GO:0004674(protein serine/threonine kinase activity);GO:0005886(plasma membrane);GO:0006468(protein phosphorylation)	NA	NA	NA	PREDICTED: putative receptor protein kinase ZmPK1 [Vitis vinifera]	NA	0.505364	0.363336	0.702807	9.86172	7.38853	18.8106	0.984296	1.39587	0.956496	2.37564e-32	1.59137e-30	yes
gene-GIB67_030412	GIB67_030412	11936	rna-gnl|WGS:JACGCM|KingUnif30194.1	NA	02010(ABC transporters)	K05666	NA	ABC transporter [Macleaya cordata]	NA	0.920927	1.1048	1.81515	29.1405	36.6503	33.311	6.20725	2.87472	4.89352	2.45392e-32	1.63847e-30	yes
gene-GIB67_041777	GIB67_041777	15513	rna-gnl|WGS:JACGCM|KingUnif19700.1	GO:0005504(fatty acid binding);GO:0005515(protein binding);GO:0005634(nucleus);GO:0005783(endoplasmic reticulum);GO:0006631(fatty acid metabolic process);GO:0009411(response to UV);GO:0009507(chloroplast);GO:0009570(chloroplast stroma);GO:0009705(plant-type vacuole membrane);GO:0009733(response to auxin);GO:0009813(flavonoid biosynthetic process);GO:0010224(response to UV-B);GO:0042406(extrinsic …	00941(Flavonoid biosynthesis)	K01859	EC:5.5.1.6	PREDICTED: chalcone--flavonone isomerase 2-like [Nelumbo nucifera]	NA	28.7227	18.5353	71.9021	6.30346	8.35048	7.13511	337.467	644.584	205.006	3.74352e-32	2.49144e-30	yes
gene-GIB67_023011	GIB67_023011	3585	rna-gnl|WGS:JACGCM|KingUnif20004.1	GO:0003677(DNA binding);GO:0005516(calmodulin binding);GO:0005634(nucleus);GO:0006351(transcription, DNA-templated);GO:0006355(regulation of transcription, DNA-templated);GO:0006950(response to stress)	NA	NA	NA	PREDICTED: calmodulin-binding protein 60 D-like isoform X2 [Nelumbo nucifera]	NA	5.48291	14.9381	6.04361	86.958	130.563	148.5	7.37259	11.043	9.65241	4.66353e-32	3.09373e-30	yes
gene-GIB67_026903	GIB67_026903	18784	rna-gnl|WGS:JACGCM|KingUnif17517.1	GO:0004842(ubiquitin-protein transferase activity);GO:0005515(protein binding);GO:0005634(nucleus);GO:0005737(cytoplasm);GO:0006355(regulation of transcription, DNA-templated);GO:0006511(ubiquitin-dependent protein catabolic process);GO:0007623(circadian rhythm);GO:0009637(response to blue light);GO:0009881(photoreceptor activity);GO:0009908(flower development);GO:0009911(positive regulation of f…	04712(Circadian rhythm - plant)	K12116	NA	putative LOV domain-containing protein [Ternstroemia gymnanthera]	NA	3.36174	3.47151	1.24543	34.0065	34.8642	22.9835	0.971167	1.30338	2.18963	5.20656e-32	3.44286e-30	yes
gene-GIB67_039589	GIB67_039589	2160	rna-gnl|WGS:JACGCM|KingUnif25918.1	NA	NA	NA	NA	hypothetical protein BVC80_1817g27 [Macleaya cordata]	NA	0.179971	0	0.322485	18.8675	21.09	52.1338	0	0.086556	0.169887	5.76599e-32	3.80056e-30	yes
gene-GIB67_035366	GIB67_035366	21146	rna-gnl|WGS:JACGCM|KingUnif32387.1	GO:0002679(respiratory burst involved in defense response);GO:0004842(ubiquitin-protein transferase activity);GO:0005737(cytoplasm);GO:0005829(cytosol);GO:0006952(defense response);GO:0009414(response to water deprivation);GO:0010200(response to chitin);GO:0016567(protein ubiquitination);GO:0051865(protein autoubiquitination)	NA	NA	NA	U box domain [Macleaya cordata]	NA	0.35107	0.583148	0.870452	23.6565	30.0662	36.9401	6.86532	5.86384	2.20126	6.06958e-32	3.98789e-30	yes
gene-GIB67_026946	GIB67_026946	3735	rna-gnl|WGS:JACGCM|KingUnif32178.1	GO:0000139(Golgi membrane);GO:0000271(polysaccharide biosynthetic process);GO:0000977(RNA polymerase II regulatory region sequence-specific DNA binding);GO:0005794(Golgi apparatus);GO:0005886(plasma membrane);GO:0009833(plant-type primary cell wall biogenesis);GO:0016021(integral component of membrane);GO:0016740(transferase activity);GO:0016757(transferase activity, transferring glycosyl groups)…	NA	NA	NA	Cellulose synthase [Macleaya cordata]	NA	2.55263	3.2139	4.26473	372.202	290.119	276.741	193.182	42.7448	74.7	6.73553e-32	4.41134e-30	yes
gene-GIB67_027034	GIB67_027034	3820	rna-gnl|WGS:JACGCM|KingUnif04362.1	GO:0005634(nucleus);GO:0005737(cytoplasm)	NA	NA	NA	hypothetical protein AQUCO_03900042v1 [Aquilegia coerulea]	NA	16.6753	21.5467	14.8587	116.316	108.028	120.333	14.5916	19.0446	21.3706	8.34383e-32	5.44733e-30	yes
gene-GIB67_023028	GIB67_023028	3606	rna-gnl|WGS:JACGCM|KingUnif18437.1	GO:0003746(translation elongation factor activity);GO:0005737(cytoplasm);GO:0005773(vacuole);GO:0005811(lipid droplet);GO:0006414(translational elongation);GO:0019915(lipid storage);GO:0034389(lipid particle organization);GO:0045927(positive regulation of growth);GO:0080186(developmental vegetative growth);GO:1902584(positive regulation of response to water deprivation)	NA	NA	NA	Stress-related protein [Actinidia chinensis var. chinensis]	NA	670.915	1619.94	631.449	65.8617	83.8156	71.4306	68.8098	94.462	77.2192	1.03653e-31	6.74566e-30	yes
gene-GIB67_028234	GIB67_028234	41521	rna-gnl|WGS:JACGCM|KingUnif26565.1	GO:0003674(molecular_function);GO:0005634(nucleus);GO:0005886(plasma membrane);GO:0008150(biological_process)	NA	NA	NA	Uncharacterized protein TCM_034301 [Theobroma cacao]	NA	10.7196	8.47913	12.0666	127.371	78.6926	113.388	21.1462	23.3731	13.7515	1.21381e-31	7.87447e-30	yes
gene-GIB67_023173	GIB67_023173	24675	rna-gnl|WGS:JACGCM|KingUnif14901.1	GO:0003677(DNA binding);GO:0003700(DNA binding transcription factor activity);GO:0005634(nucleus);GO:0006351(transcription, DNA-templated);GO:0006355(regulation of transcription, DNA-templated);GO:0009738(abscisic acid-activated signaling pathway);GO:0019760(glucosinolate metabolic process);GO:0043565(sequence-specific DNA binding)	NA	NA	NA	PREDICTED: dehydration-responsive element-binding protein 1B-like [Nelumbo nucifera]	NA	1.88388	4.95091	2.14687	69.6225	73.1514	56.407	0.95629	3.00523	3.94062	1.27998e-31	8.27763e-30	yes
gene-GIB67_003876	GIB67_003876	34221	rna-gnl|WGS:JACGCM|KingUnif30831.1	GO:0005509(calcium ion binding);GO:0005634(nucleus)	NA	NA	NA	PREDICTED: uncharacterized protein LOC101300297 [Fragaria vesca subsp. vesca]	NA	73.2896	55.2351	56.9136	494.784	289.306	449.791	48.3871	51.4789	52.493	1.43219e-31	9.2329e-30	yes
gene-GIB67_040039	GIB67_040039	18410	rna-gnl|WGS:JACGCM|KingUnif35581.1	GO:0003674(molecular_function);GO:0005634(nucleus);GO:0016021(integral component of membrane)	NA	NA	NA	PREDICTED: uncharacterized protein LOC104606327 [Nelumbo nucifera]	NA	4.0495	4.44934	4.30956	42.5985	59.4524	60.485	1.78288	3.48873	6.52284	1.59771e-31	1.02678e-29	yes
gene-GIB67_032709	GIB67_032709	18035	rna-gnl|WGS:JACGCM|KingUnif42741.1	GO:0005634(nucleus)	04141(Protein processing in endoplasmic reticulum)	K14016	NA	hypothetical protein AQUCO_03200020v1 [Aquilegia coerulea]	NA	278.711	498.796	272.633	36.7823	29.8604	35.7591	44.5838	59.0247	43.8746	1.72402e-31	1.1045e-29	yes
gene-GIB67_023946	GIB67_023946	26745	rna-gnl|WGS:JACGCM|KingUnif16279.1	GO:0005634(nucleus);GO:0005737(cytoplasm)	NA	NA	NA	Armadillo [Macleaya cordata]	NA	12.5323	8.31836	17.0972	157.243	160.776	213.896	43.0303	42.8048	35.4836	1.88526e-31	1.20405e-29	yes
gene-GIB67_007678	GIB67_007678	16081	rna-gnl|WGS:JACGCM|KingUnif31862.1	GO:0003674(molecular_function);GO:0005634(nucleus);GO:0008150(biological_process)	NA	NA	NA	Protein of unknown function DUF3527 [Macleaya cordata]	NA	23.5738	22.8225	12.801	1.59991	1.11269	1.06196	4.37827	4.68597	2.5469	2.21363e-31	1.40939e-29	yes
gene-GIB67_022210	GIB67_022210	26526	rna-gnl|WGS:JACGCM|KingUnif22714.1	GO:0005777(peroxisome);GO:0006598(polyamine catabolic process);GO:0008131(primary amine oxidase activity);GO:0046592(polyamine oxidase activity);GO:0055114(oxidation-reduction process)	00330(Arginine and proline metabolism);00410(beta-Alanine metabolism)	K17839	EC:1.5.3.17;EC:1.5.3.-	Amine oxidase [Cynara cardunculus var. scolymus]	NA	7.7603	9.60114	6.50755	59.3672	54.0409	70.7155	13.2087	15.8769	16.2339	2.32168e-31	1.47362e-29	yes
gene-GIB67_019261	GIB67_019261	16923	rna-gnl|WGS:JACGCM|KingUnif10907.1	GO:0003677(DNA binding);GO:0003700(DNA binding transcription factor activity);GO:0005634(nucleus);GO:0006351(transcription, DNA-templated);GO:0006355(regulation of transcription, DNA-templated);GO:0009873(ethylene-activated signaling pathway);GO:0019760(glucosinolate metabolic process);GO:0043565(sequence-specific DNA binding);GO:0044212(transcription regulatory region DNA binding);GO:0045893(pos…	NA	NA	NA	ethylene-responsive transcription factor ERF026-like [Hevea brasiliensis]	NA	0.671138	1.13008	0.930409	26.7311	30.9757	20.0299	0.621888	1.68676	0.537017	2.34549e-31	1.48416e-29	yes
gene-GIB67_035387	GIB67_035387	21167	rna-gnl|WGS:JACGCM|KingUnif28876.1	GO:0000149(SNARE binding);GO:0005484(SNAP receptor activity);GO:0005886(plasma membrane);GO:0006886(intracellular protein transport);GO:0006887(exocytosis);GO:0006906(vesicle fusion);GO:0012505(endomembrane system);GO:0016021(integral component of membrane);GO:0031201(SNARE complex);GO:0048278(vesicle docking)	04130(SNARE interactions in vesicular transport)	K08486	NA	t-SNARE [Trema orientale]	NA	37.1203	59.5123	62.3216	458.653	556.812	621.822	118.775	117.136	112.48	2.4987e-31	1.57625e-29	yes
gene-GIB67_022573	GIB67_022573	38712	rna-gnl|WGS:JACGCM|KingUnif27895.1	GO:0004553(hydrolase activity, hydrolyzing O-glycosyl compounds);GO:0005576(extracellular region);GO:0005618(cell wall);GO:0005794(Golgi apparatus);GO:0010411(xyloglucan metabolic process);GO:0016762(xyloglucan:xyloglucosyl transferase activity);GO:0016798(hydrolase activity, acting on glycosyl bonds);GO:0042546(cell wall biogenesis);GO:0048046(apoplast);GO:0071555(cell wall organization)	04075(Plant hormone signal transduction)	K14504	EC:2.4.1.207	PREDICTED: probable xyloglucan endotransglucosylase/hydrolase protein 23 [Vitis vinifera]	NA	2.36789	2.27902	2.799	34.0022	121.394	84.9088	10.7077	7.94738	16.77	3.53442e-31	2.2228e-29	yes
gene-GIB67_001077	GIB67_001077	23481	rna-gnl|WGS:JACGCM|KingUnif08414.1	GO:0004332(fructose-bisphosphate aldolase activity);GO:0005515(protein binding);GO:0005737(cytoplasm);GO:0005829(cytosol);GO:0006094(gluconeogenesis);GO:0006096(glycolytic process);GO:0009507(chloroplast)	00010(Glycolysis / Gluconeogenesis);00030(Pentose phosphate pathway);00051(Fructose and mannose metabolism);00710(Carbon fixation in photosynthetic organisms)	K01623	EC:4.1.2.13	PREDICTED: fructose-bisphosphate aldolase, cytoplasmic isozyme 1 [Nelumbo nucifera]	NA	10.616	6.50531	16.4263	145.296	213.707	160.088	15.7923	14.7228	29.6548	3.63289e-31	2.27776e-29	yes
gene-GIB67_039922	GIB67_039922	3290	rna-gnl|WGS:JACGCM|KingUnif23498.1	GO:0003700(DNA binding transcription factor activity);GO:0005634(nucleus);GO:0006355(regulation of transcription, DNA-templated);GO:0043565(sequence-specific DNA binding)	04075(Plant hormone signal transduction)	K14494	NA	Transcription factor GRAS [Macleaya cordata]	NA	52.5667	88.9716	44.1376	393.757	469.792	493.306	23.2851	40.2162	36.3461	3.7873e-31	2.36735e-29	yes
gene-GIB67_038849	GIB67_038849	6594	rna-gnl|WGS:JACGCM|KingUnif08341.1	GO:0003674(molecular_function);GO:0005634(nucleus);GO:0008150(biological_process)	NA	NA	NA	Protein of unknown function DUF3527 [Macleaya cordata]	NA	22.8457	22.1836	12.0403	1.50861	1.01243	1.06196	4.24789	4.4871	2.48028	3.80601e-31	2.37184e-29	yes
gene-GIB67_041869	GIB67_041869	39249	rna-gnl|WGS:JACGCM|KingUnif22664.1	GO:0005576(extracellular region);GO:0005618(cell wall);GO:0016021(integral component of membrane);GO:0016042(lipid catabolic process);GO:0016787(hydrolase activity);GO:0016788(hydrolase activity, acting on ester bonds);GO:0052689(carboxylic ester hydrolase activity)	00901(Indole alkaloid biosynthesis)	K21026	EC:3.1.1.80	PREDICTED: GDSL esterase/lipase At5g03980-like [Nelumbo nucifera]	NA	1.76429	2.65233	2.17556	69.9755	102.676	135.747	22.7207	7.57024	5.22483	3.89622e-31	2.42072e-29	yes
gene-GIB67_023325	GIB67_023325	11694	rna-gnl|WGS:JACGCM|KingUnif13181.1	GO:0005509(calcium ion binding);GO:0005575(cellular_component);GO:0008150(biological_process)	04016(MAPK signaling pathway - plant);04070(Phosphatidylinositol signaling system);04626(Plant-pathogen interaction)	K02183	NA	hypothetical protein GOBAR_AA26577 [Gossypium barbadense]	NA	6.62288	6.63561	15.6985	373.238	197.769	226.551	37.8293	59.5757	65.8576	3.93911e-31	2.43999e-29	yes
gene-GIB67_038356	GIB67_038356	28054	rna-gnl|WGS:JACGCM|KingUnif20639.1	GO:0004674(protein serine/threonine kinase activity);GO:0005886(plasma membrane);GO:0006468(protein phosphorylation)	NA	NA	NA	hypothetical protein AQUCO_02600432v1 [Aquilegia coerulea]	NA	1.86199	1.17009	1.73654	32.8261	24.5353	25.0547	24.9468	12.2692	17.0803	4.48342e-31	2.76881e-29	yes
gene-GIB67_032433	GIB67_032433	22443	rna-gnl|WGS:JACGCM|KingUnif20702.1	GO:0051213(dioxygenase activity)	00402(Benzoxazinoid biosynthesis)	K13229	EC:1.14.11.59	hypothetical protein AQUCO_03400386v1 [Aquilegia coerulea]	NA	2.69334	1.36993	3.64286	36.236	53.9498	39.6443	4.5094	3.64682	5.8049	4.56348e-31	2.80982e-29	yes
gene-GIB67_000605	GIB67_000605	1897	rna-gnl|WGS:JACGCM|KingUnif02843.1	NA	NA	NA	NA	hypothetical protein BVC80_1467g6 [Macleaya cordata]	NA	7.83312	5.16428	6.04361	57.3167	58.959	48.7078	17.7599	16.4355	18.5071	4.71091e-31	2.89193e-29	yes
gene-GIB67_023926	GIB67_023926	18238	rna-gnl|WGS:JACGCM|KingUnif21906.1	GO:0000325(plant-type vacuole);GO:0005524(ATP binding);GO:0005774(vacuolar membrane);GO:0005886(plasma membrane);GO:0008559(xenobiotic transmembrane transporting ATPase activity);GO:0016021(integral component of membrane);GO:0042626(ATPase activity, coupled to transmembrane movement of substances);GO:0055085(transmembrane transport)	02010(ABC transporters)	K05666	NA	ABC transporter C family member 10 [Hevea brasiliensis]	NA	1.30733	0.935622	0.573769	14.9218	13.1512	17.9138	2.50903	1.92867	2.2913	4.8917e-31	2.99398e-29	yes
gene-GIB67_041354	GIB67_041354	10165	rna-gnl|WGS:JACGCM|KingUnif33210.1	NA	NA	NA	NA	Putative L-type lectin-domain containing receptor kinase S.5 [Glycine soja]	NA	0.728431	0.406512	1.10093	25.4121	28.7829	16.8972	2.52504	1.74684	1.55578	5.10689e-31	3.11641e-29	yes
gene-GIB67_000756	GIB67_000756	12132	rna-gnl|WGS:JACGCM|KingUnif37880.1	GO:0005886(plasma membrane)	NA	NA	NA	Target SNARE coiled-coil domain [Macleaya cordata]	NA	7.18552	15.9266	10.6674	118.158	153.231	193.891	12.051	20.5191	7.58692	5.40953e-31	3.2812e-29	yes
gene-GIB67_021914	GIB67_021914	15166	rna-gnl|WGS:JACGCM|KingUnif02440.1	GO:0009813(flavonoid biosynthetic process);GO:0043231(intracellular membrane-bounded organelle);GO:0052696(flavonoid glucuronidation);GO:0080043(quercetin 3-O-glucosyltransferase activity);GO:0080044(quercetin 7-O-glucosyltransferase activity)	NA	NA	NA	hypothetical protein AQUCO_08300035v1 [Aquilegia coerulea]	NA	5.09728	4.87619	8.96134	75.8287	64.8561	74.5313	21.2905	16.3847	13.4503	5.41693e-31	3.2812e-29	yes
gene-GIB67_015890	GIB67_015890	10859	rna-gnl|WGS:JACGCM|KingUnif36950.1	GO:0000272(polysaccharide catabolic process);GO:0005576(extracellular region);GO:0009507(chloroplast);GO:0016161(beta-amylase activity);GO:0102229(amylopectin maltohydrolase activity)	03013(RNA transport)	K14310	NA	beta-amylase-like isoform X2 [Olea europaea var. sylvestris]	NA	4.13618	3.33513	1.71534	38.6078	31.6721	22.1866	1.54098	2.69575	2.0067	5.42479e-31	3.2812e-29	yes
gene-GIB67_019248	GIB67_019248	16911	rna-gnl|WGS:JACGCM|KingUnif04124.1	GO:0003677(DNA binding);GO:0003700(DNA binding transcription factor activity);GO:0005634(nucleus);GO:0006351(transcription, DNA-templated);GO:0006355(regulation of transcription, DNA-templated);GO:0009738(abscisic acid-activated signaling pathway);GO:0019760(glucosinolate metabolic process);GO:0043565(sequence-specific DNA binding)	NA	NA	NA	AP2/ERF domain [Macleaya cordata]	NA	0.480601	0.192696	0.111343	31.2033	38.2163	10.5864	0.409093	0.886	0.283455	6.47217e-31	3.90323e-29	yes
gene-GIB67_017263	GIB67_017263	38918	rna-gnl|WGS:JACGCM|KingUnif06889.1	GO:0005576(extracellular region);GO:0052689(carboxylic ester hydrolase activity)	00901(Indole alkaloid biosynthesis)	K21026	EC:3.1.1.80	PREDICTED: GDSL esterase/lipase At5g08460-like [Nelumbo nucifera]	NA	34.6708	123.297	22.2403	0.844683	0.488941	0.330362	4.4587	4.22916	5.878	6.6581e-31	4.00362e-29	yes
gene-GIB67_029103	GIB67_029103	14441	rna-gnl|WGS:JACGCM|KingUnif17229.1	GO:0000771(agglutination involved in conjugation);GO:0005536(glucose binding);GO:0005537(mannose binding);GO:0005575(cellular_component)	NA	NA	NA	agglutinin-like isoform X2 [Quercus suber]	NA	6.14413	4.32454	5.07712	49.2515	52.9392	38.3008	4.07633	8.25672	6.45154	6.89067e-31	4.13139e-29	yes
gene-GIB67_006114	GIB67_006114	32549	rna-gnl|WGS:JACGCM|KingUnif29060.1	NA	NA	NA	NA		NA	25.8834	26.8106	33.319	220.685	372.668	334.582	70.5764	37.1256	40.4719	6.9965e-31	4.18265e-29	yes
gene-GIB67_028569	GIB67_028569	6178	rna-gnl|WGS:JACGCM|KingUnif09655.1	GO:0003723(RNA binding);GO:0004519(endonuclease activity);GO:0008270(zinc ion binding);GO:0009451(RNA modification);GO:0009507(chloroplast)	NA	NA	NA	Pentatricopeptide repeat [Macleaya cordata]	NA	32.131	69.4265	27.9109	7.38565	7.10265	6.27638	1.91294	1.72347	3.00521	7.90172e-31	4.71011e-29	yes
gene-GIB67_025485	GIB67_025485	19	rna-gnl|WGS:JACGCM|KingUnif23349.1	GO:0010162(seed dormancy process);GO:0043161(proteasome-mediated ubiquitin-dependent protein catabolic process);GO:0061630(ubiquitin protein ligase activity)	NA	NA	NA	E3 ubiquitin-protein ligase ATL41-like [Papaver somniferum]	NA	10.7273	23.1556	14.5396	142.704	228.545	190.686	39.0209	30.949	26.9796	9.35817e-31	5.56216e-29	yes
gene-GIB67_022180	GIB67_022180	18146	rna-gnl|WGS:JACGCM|KingUnif17770.1	GO:0004497(monooxygenase activity);GO:0044550(secondary metabolite biosynthetic process)	NA	NA	NA	hypothetical protein AQUCO_00500015v1 [Aquilegia coerulea]	NA	54.3283	40.872	73.2901	15.0281	7.85374	6.66354	160.605	206.779	199.995	1.03977e-30	6.16222e-29	yes
gene-GIB67_010528	GIB67_010528	25351	rna-gnl|WGS:JACGCM|KingUnif09274.1	GO:0004672(protein kinase activity);GO:0005515(protein binding);GO:0005524(ATP binding);GO:0005886(plasma membrane);GO:0006468(protein phosphorylation);GO:0006995(cellular response to nitrogen starvation);GO:0009414(response to water deprivation);GO:0009507(chloroplast);GO:0009637(response to blue light);GO:0009767(photosynthetic electron transport chain);GO:0010027(thylakoid membrane organizatio…	NA	NA	NA	Protein kinase domain [Macleaya cordata]	NA	7.56684	4.35862	8.60764	62.6026	84.8248	98.3288	21.3855	18.8905	21.7	1.34316e-30	7.93739e-29	yes
gene-GIB67_030656	GIB67_030656	10201	rna-gnl|WGS:JACGCM|KingUnif25537.1	NA	NA	NA	NA		NA	54.9189	20.9605	43.2839	190.927	247.703	190.044	7.38615	15.8387	10.2344	1.45119e-30	8.55124e-29	yes
gene-GIB67_000914	GIB67_000914	23322	rna-gnl|WGS:JACGCM|KingUnif13030.1	GO:0005634(nucleus);GO:0005737(cytoplasm)	NA	NA	NA	PREDICTED: U-box domain-containing protein 44-like isoform X1 [Nelumbo nucifera]	NA	5.73475	6.97663	6.58254	37.1098	40.0626	47.551	7.80108	10.006	10.4745	1.66798e-30	9.80058e-29	yes
gene-GIB67_014082	GIB67_014082	42164	rna-gnl|WGS:JACGCM|KingUnif31633.1	GO:0005576(extracellular region);GO:0006952(defense response)	NA	NA	NA	hypothetical protein F511_11447 [Dorcoceras hygrometricum]	NA	7.2746	3.55827	12.6206	154.867	126.195	236.698	9.02999	19.2839	15.0095	2.04412e-30	1.19764e-28	yes
gene-GIB67_031204	GIB67_031204	9563	rna-gnl|WGS:JACGCM|KingUnif11546.1	GO:0003674(molecular_function);GO:0005634(nucleus);GO:0016567(protein ubiquitination)	NA	NA	NA	F-box domain [Macleaya cordata]	NA	161.425	282.651	127.18	72.6149	65.981	81.0432	11.4274	14.9084	11.3783	2.41845e-30	1.41294e-28	yes
gene-GIB67_036890	GIB67_036890	31799	rna-gnl|WGS:JACGCM|KingUnif27499.1	GO:0005634(nucleus);GO:0008568(microtubule-severing ATPase activity);GO:0031122(cytoplasmic microtubule organization)	00760(Nicotinate and nicotinamide metabolism)	K00323	EC:1.6.1.2	AAA+ ATPase domain [Macleaya cordata]	NA	124.252	181.217	64.2382	7.23197	11.3603	12.5401	10.9814	14.6734	10.9101	2.99669e-30	1.74581e-28	yes
gene-GIB67_001790	GIB67_001790	37117	rna-gnl|WGS:JACGCM|KingUnif33165.1	GO:0000811(GINS complex);GO:0043138(3'-5' DNA helicase activity);GO:1902983(DNA strand elongation involved in mitotic DNA replication)	NA	NA	NA	hypothetical protein AQUCO_00900831v1 [Aquilegia coerulea]	NA	46.2766	220.727	23.1145	2.08298	2.24098	2.15607	1.38439	1.8222	1.70741	4.20659e-30	2.44374e-28	yes
gene-GIB67_025981	GIB67_025981	38376	rna-gnl|WGS:JACGCM|KingUnif18059.1	GO:0003674(molecular_function);GO:0005634(nucleus);GO:0008150(biological_process)	NA	NA	NA	PREDICTED: uncharacterized protein LOC104600530 [Nelumbo nucifera]	NA	21.9611	12.0668	22.7974	169.476	159.13	151.638	33.9343	35.4496	29.6246	4.49715e-30	2.60518e-28	yes
gene-GIB67_033739	GIB67_033739	2981	rna-gnl|WGS:JACGCM|KingUnif29128.1	GO:0004674(protein serine/threonine kinase activity);GO:0005886(plasma membrane);GO:0007166(cell surface receptor signaling pathway)	NA	NA	NA	wall-associated receptor kinase 2-like [Papaver somniferum]	NA	2.47367	3.80754	2.11788	43.8097	33.6267	27.4675	8.43778	8.61206	7.35263	4.6039e-30	2.65953e-28	yes
gene-GIB67_033811	GIB67_033811	34765	rna-gnl|WGS:JACGCM|KingUnif34536.1	NA	NA	NA	NA	uncharacterized protein LOC110761939 [Prunus avium]	NA	136.831	99.9704	84.4262	330.466	293.298	242.422	12.6262	20.1127	26.7057	5.92389e-30	3.40995e-28	yes
gene-GIB67_008285	GIB67_008285	14900	rna-gnl|WGS:JACGCM|KingUnif12420.1	GO:0004364(glutathione transferase activity);GO:0005737(cytoplasm);GO:0006749(glutathione metabolic process);GO:0009407(toxin catabolic process)	00480(Glutathione metabolism)	K00799	EC:2.5.1.18	Glutathione S-transferase [Macleaya cordata]	NA	5.04102	5.72193	11.6518	140.713	162.541	222.509	90.9487	66.6608	47.1706	5.93611e-30	3.40995e-28	yes
gene-GIB67_017961	GIB67_017961	22611	rna-gnl|WGS:JACGCM|KingUnif09400.1	GO:0005524(ATP binding);GO:0005618(cell wall);GO:0005739(mitochondrion);GO:0005759(mitochondrial matrix);GO:0005774(vacuolar membrane);GO:0005794(Golgi apparatus);GO:0005829(cytosol);GO:0006457(protein folding);GO:0008270(zinc ion binding);GO:0009408(response to heat);GO:0009651(response to salt stress);GO:0009735(response to cytokinin);GO:0034620(cellular response to unfolded protein);GO:0044183…	03018(RNA degradation)	K04043	NA	Heat shock protein 70 family [Macleaya cordata]	NA	171.532	223.666	165.347	18.4044	24.404	17.4686	51.5336	47.1763	36.9517	6.57856e-30	3.76847e-28	yes
gene-GIB67_025892	GIB67_025892	32699	rna-gnl|WGS:JACGCM|KingUnif02838.1	NA	NA	NA	NA	hypothetical protein POPTR_001G181701 [Populus trichocarpa]	NA	0.15764	0.118634	0.878365	23.9051	19.0774	24.5885	39.4941	50.7212	27.852	6.62726e-30	3.78582e-28	yes
gene-GIB67_040763	GIB67_040763	28483	rna-gnl|WGS:JACGCM|KingUnif38962.1	GO:0005524(ATP binding);GO:0005618(cell wall);GO:0005739(mitochondrion);GO:0005759(mitochondrial matrix);GO:0005774(vacuolar membrane);GO:0005794(Golgi apparatus);GO:0005829(cytosol);GO:0006457(protein folding);GO:0008270(zinc ion binding);GO:0009408(response to heat);GO:0009651(response to salt stress);GO:0009735(response to cytokinin);GO:0034620(cellular response to unfolded protein);GO:0044183…	03018(RNA degradation)	K04043	NA	Heat shock protein 70 family [Macleaya cordata]	NA	191.425	249.718	184.936	19.5053	27.2252	19.7006	57.8168	52.6424	40.8741	6.69587e-30	3.81442e-28	yes
gene-GIB67_042551	GIB67_042551	28599	rna-gnl|WGS:JACGCM|KingUnif21841.1	GO:0000271(polysaccharide biosynthetic process);GO:0000977(RNA polymerase II regulatory region sequence-specific DNA binding);GO:0005768(endosome);GO:0005794(Golgi apparatus);GO:0005802(trans-Golgi network);GO:0005886(plasma membrane);GO:0009409(response to cold);GO:0009832(plant-type cell wall biogenesis);GO:0016757(transferase activity, transferring glycosyl groups);GO:0016759(cellulose synthas…	NA	NA	NA	Cellulose synthase [Trema orientale]	NA	4.66486	3.85195	6.58245	33.4851	34.0268	53.2811	7.89623	8.17677	6.8551	6.98272e-30	3.96684e-28	yes
gene-GIB67_042283	GIB67_042283	36340	rna-gnl|WGS:JACGCM|KingUnif06091.1	GO:0004386(helicase activity);GO:0005634(nucleus);GO:0008150(biological_process)	00500(Starch and sucrose metabolism);00230(Purine metabolism);00240(Pyrimidine metabolism);00740(Riboflavin metabolism);00760(Nicotinate and nicotinamide metabolism);00770(Pantothenate and CoA biosynthesis)	K01513	EC:3.1.4.1;EC:3.6.1.9	hypothetical protein AQUCO_03700136v1 [Aquilegia coerulea]	NA	8.32463	6.17329	7.33778	52.2919	48.1507	61.2405	15.2219	11.3842	14.7295	9.4021e-30	5.32656e-28	yes
gene-GIB67_021436	GIB67_021436	7743	rna-gnl|WGS:JACGCM|KingUnif39626.1	GO:0003674(molecular_function);GO:0008150(biological_process);GO:0016021(integral component of membrane)	NA	NA	NA	hypothetical protein AQUCO_04100213v1 [Aquilegia coerulea]	NA	0.327747	0.253055	0.364126	11.9747	9.21821	10.2519	0.834822	0.853071	0.243054	1.06115e-29	5.99523e-28	yes
gene-GIB67_013244	GIB67_013244	6906	rna-gnl|WGS:JACGCM|KingUnif14470.1	GO:0004439(phosphatidylinositol-4,5-bisphosphate 5-phosphatase activity);GO:0005634(nucleus);GO:0005774(vacuolar membrane);GO:0007033(vacuole organization);GO:0036092(phosphatidylinositol-3-phosphate biosynthetic process);GO:0042578(phosphoric ester hydrolase activity)	00562(Inositol phosphate metabolism);04070(Phosphatidylinositol signaling system)	K21797	EC:3.1.3.-	Synaptojanin [Macleaya cordata]	NA	4.7043	3.44491	4.09656	27.602	21.5194	26.2019	5.3072	5.7522	5.38296	1.23247e-29	6.94405e-28	yes
gene-GIB67_038515	GIB67_038515	8165	rna-gnl|WGS:JACGCM|KingUnif08575.1	GO:0005509(calcium ion binding)	04626(Plant-pathogen interaction)	K13448	NA	hypothetical protein POPTR_010G132800 [Populus trichocarpa]	NA	9.68088	5.14088	6.7732	86.7844	100.086	85.4028	16.4985	17.9758	10.2261	1.30588e-29	7.33752e-28	yes
gene-GIB67_011648	GIB67_011648	9169	rna-gnl|WGS:JACGCM|KingUnif10504.1	GO:0003700(DNA binding transcription factor activity);GO:0005515(protein binding);GO:0005634(nucleus);GO:0006351(transcription, DNA-templated);GO:0006355(regulation of transcription, DNA-templated);GO:0009873(ethylene-activated signaling pathway);GO:0010200(response to chitin);GO:0016036(cellular response to phosphate starvation);GO:0043565(sequence-specific DNA binding);GO:0044212(transcription …	00970(Aminoacyl-tRNA biosynthesis)	K01892	EC:6.1.1.21	PREDICTED: probable WRKY transcription factor 31 [Nelumbo nucifera]	NA	7.25106	4.3816	22.5862	505.245	440.327	649.404	52.7149	55.5371	43.661	1.36864e-29	7.66925e-28	yes
gene-GIB67_021630	GIB67_021630	38908	rna-gnl|WGS:JACGCM|KingUnif17941.1	GO:0003713(transcription coactivator activity);GO:0005515(protein binding);GO:0005622(intracellular);GO:0005634(nucleus);GO:0006266(DNA ligation);GO:0006281(DNA repair);GO:0006303(double-strand break repair via nonhomologous end joining);GO:0010385(double-stranded methylated DNA binding);GO:0080111(DNA demethylation);GO:1901969(positive regulation of polynucleotide 3'-phosphatase activity);GO:190…	03410(Base excision repair)	K10803	NA	BRCT domain [Macleaya cordata]	NA	9.95484	8.97255	10.68	0	0	0	11.2551	7.55424	21.3813	1.4341e-29	8.01423e-28	yes
gene-GIB67_004286	GIB67_004286	19670	rna-gnl|WGS:JACGCM|KingUnif02842.1	GO:0015079(potassium ion transmembrane transporter activity);GO:0016020(membrane)	NA	NA	NA	PREDICTED: potassium transporter 6-like [Nelumbo nucifera]	NA	8.08	4.20859	3.95821	108.862	57.9688	79.2436	9.02774	17.3279	11.6497	1.93975e-29	1.08106e-27	yes
gene-GIB67_030334	GIB67_030334	26680	rna-gnl|WGS:JACGCM|KingUnif02573.1	GO:0004672(protein kinase activity);GO:0004707(MAP kinase activity);GO:0005515(protein binding);GO:0005524(ATP binding);GO:0005634(nucleus);GO:0005737(cytoplasm);GO:0006468(protein phosphorylation);GO:0006970(response to osmotic stress);GO:0006979(response to oxidative stress);GO:0007165(signal transduction);GO:0009409(response to cold);GO:0009555(pollen development);GO:0009611(response to woundi…	04016(MAPK signaling pathway - plant)	K20536	EC:2.7.11.24	Protein kinase domain [Macleaya cordata]	NA	9.05791	10.9391	24.6564	285.82	233.378	316.295	24.8666	51.0035	35.3291	2.22991e-29	1.23941e-27	yes
gene-GIB67_012130	GIB67_012130	13403	rna-gnl|WGS:JACGCM|KingUnif10333.1	GO:0005524(ATP binding);GO:0009507(chloroplast);GO:0009570(chloroplast stroma);GO:0009941(chloroplast envelope);GO:0016887(ATPase activity);GO:0019538(protein metabolic process);GO:0034214(protein hexamerization);GO:0042803(protein homodimerization activity)	NA	NA	NA	hypothetical protein AQUCO_02400049v1 [Aquilegia coerulea]	NA	13.6861	11.3395	23.0503	257.548	147.385	257.889	40.1267	35.0835	32.6747	2.34384e-29	1.29922e-27	yes
gene-GIB67_030365	GIB67_030365	26702	rna-gnl|WGS:JACGCM|KingUnif32755.1	GO:0000156(phosphorelay response regulator activity);GO:0000160(phosphorelay signal transduction system);GO:0003677(DNA binding);GO:0005634(nucleus);GO:0005739(mitochondrion);GO:0006351(transcription, DNA-templated);GO:0006355(regulation of transcription, DNA-templated);GO:0007623(circadian rhythm);GO:0009266(response to temperature stimulus);GO:0010017(red or far-red light signaling pathway);GO:…	04712(Circadian rhythm - plant)	K12129	NA	PREDICTED: two-component response regulator-like PRR37 [Nelumbo nucifera]	NA	34.964	24.7263	18.431	172.339	170.694	171.499	18.1479	24.6971	24.04	3.08735e-29	1.70676e-27	yes
gene-GIB67_038543	GIB67_038543	8193	rna-gnl|WGS:JACGCM|KingUnif12409.1	GO:0003674(molecular_function);GO:0005739(mitochondrion);GO:0008150(biological_process);GO:0016020(membrane)	00564(Glycerophospholipid metabolism);00565(Ether lipid metabolism);00440(Phosphonate and phosphinate metabolism)	K00993	EC:2.7.8.1	Protein of unknown function DUF1262 [Macleaya cordata]	NA	0.712824	0.322082	0.708452	52.7352	13.287	30.0379	4.57398	3.73106	5.31031	4.01554e-29	2.21393e-27	yes
gene-GIB67_013089	GIB67_013089	29919	rna-gnl|WGS:JACGCM|KingUnif35567.1	GO:0005739(mitochondrion)	NA	NA	NA	PREDICTED: chaperone protein ClpB3, mitochondrial [Nelumbo nucifera]	NA	213.352	289.024	210.28	22.1495	26.2804	20.5776	69.8357	71.4745	55.9196	4.09956e-29	2.25421e-27	yes
gene-GIB67_029965	GIB67_029965	17414	rna-gnl|WGS:JACGCM|KingUnif33994.1	GO:0000139(Golgi membrane);GO:0005794(Golgi apparatus);GO:0009506(plasmodesma);GO:0016021(integral component of membrane);GO:0016757(transferase activity, transferring glycosyl groups);GO:0016759(cellulose synthase activity);GO:0071555(cell wall organization)	NA	NA	NA	putative xyloglucan glycosyltransferase 12 [Vitis vinifera]	NA	1.27886	0.653662	1.36629	13.7729	14.2486	15.6118	3.39293	2.37082	2.06914	4.13273e-29	2.26639e-27	yes
gene-GIB67_029105	GIB67_029105	14443	rna-gnl|WGS:JACGCM|KingUnif01963.1	NA	NA	NA	NA		NA	15.109	19.1316	15.6389	0	0	0	11.605	2.31034	14.8594	4.45826e-29	2.43841e-27	yes
gene-GIB67_040672	GIB67_040672	43212	rna-gnl|WGS:JACGCM|KingUnif12488.1	GO:0005634(nucleus);GO:0005737(cytoplasm);GO:0005829(cytosol);GO:0005886(plasma membrane);GO:0046686(response to cadmium ion)	NA	NA	NA	Tetratricopeptide TPR-1 [Macleaya cordata]	NA	1700.01	2732.95	1551.37	75.8882	97.4563	87.9565	431.62	495.399	281.213	4.8627e-29	2.65256e-27	yes
gene-GIB67_042771	GIB67_042771	40881	rna-gnl|WGS:JACGCM|KingUnif22127.1	GO:0004674(protein serine/threonine kinase activity);GO:0004713(protein tyrosine kinase activity);GO:0005524(ATP binding);GO:0005886(plasma membrane);GO:0006468(protein phosphorylation);GO:0007169(transmembrane receptor protein tyrosine kinase signaling pathway);GO:0009505(plant-type cell wall);GO:0009506(plasmodesma);GO:0016021(integral component of membrane)	NA	NA	NA	hypothetical protein AQUCO_01000498v1 [Aquilegia coerulea]	NA	3.12861	1.58825	4.71863	35.6657	34.4244	48.5525	6.43748	7.30992	6.21675	5.18542e-29	2.82112e-27	yes
gene-GIB67_002566	GIB67_002566	15294	rna-gnl|WGS:JACGCM|KingUnif18199.1	NA	NA	NA	NA	PREDICTED: vesicle-associated membrane protein 721-like isoform X1 [Gossypium raimondii]	NA	8.49188	10.2951	5.88104	0	0	0	17.3349	8.14938	16.6736	6.0666e-29	3.29181e-27	yes
gene-GIB67_012706	GIB67_012706	11254	rna-gnl|WGS:JACGCM|KingUnif25659.1	GO:0000175(3'-5'-exoribonuclease activity);GO:0000288(nuclear-transcribed mRNA catabolic process, deadenylation-dependent decay);GO:0030014(CCR4-NOT complex)	03018(RNA degradation)	K12581	NA	Ribonuclease CAF1 [Macleaya cordata]	NA	50.8173	56.1196	86.3227	398.163	390.059	523.555	32.1824	64.011	50.9126	6.13441e-29	3.31985e-27	yes
gene-GIB67_023660	GIB67_023660	13229	rna-gnl|WGS:JACGCM|KingUnif32059.1	GO:0004351(glutamate decarboxylase activity);GO:0005516(calmodulin binding);GO:0005829(cytosol);GO:0006536(glutamate metabolic process);GO:0030170(pyridoxal phosphate binding);GO:0046686(response to cadmium ion)	00650(Butanoate metabolism);00250(Alanine, aspartate and glutamate metabolism);00410(beta-Alanine metabolism);00430(Taurine and hypotaurine metabolism)	K01580	EC:4.1.1.15	PREDICTED: glutamate decarboxylase [Nicotiana sylvestris]	NA	7.70012	3.30815	6.08805	128.256	99.8822	110.748	17.9168	18.7975	37.7421	6.66429e-29	3.59714e-27	yes
gene-GIB67_002759	GIB67_002759	20343	rna-gnl|WGS:JACGCM|KingUnif24832.1	GO:0000719(photoreactive repair);GO:0003684(damaged DNA binding);GO:0003904(deoxyribodipyrimidine photo-lyase activity);GO:0003913(DNA photolyase activity);GO:0006281(DNA repair);GO:0018298(protein-chromophore linkage);GO:0045892(negative regulation of transcription, DNA-templated);GO:0050660(flavin adenine dinucleotide binding)	NA	NA	NA	Cryptochrome/DNA photolyase [Macleaya cordata]	NA	2.44942	1.9396	4.2502	23.7446	19.3763	28.3304	2.23201	1.54862	2.23443	6.74804e-29	3.63281e-27	yes
gene-GIB67_027245	GIB67_027245	41785	rna-gnl|WGS:JACGCM|KingUnif23633.1	GO:0004439(phosphatidylinositol-4,5-bisphosphate 5-phosphatase activity);GO:0004445(inositol-polyphosphate 5-phosphatase activity);GO:0005737(cytoplasm);GO:0009737(response to abscisic acid);GO:0009738(abscisic acid-activated signaling pathway);GO:0009845(seed germination);GO:0032957(inositol trisphosphate metabolic process);GO:0034485(phosphatidylinositol-3,4,5-trisphosphate 5-phosphatase activi…	00562(Inositol phosphate metabolism);04070(Phosphatidylinositol signaling system)	K20279	EC:3.1.3.36	PREDICTED: type I inositol polyphosphate 5-phosphatase 2 [Vitis vinifera]	NA	2.97739	4.6322	4.30779	38.032	44.3176	30.852	31.3161	32.6693	45.7863	6.86949e-29	3.68854e-27	yes
gene-GIB67_037466	GIB67_037466	12233	rna-gnl|WGS:JACGCM|KingUnif35101.1	GO:0000139(Golgi membrane);GO:0003824(catalytic activity);GO:0005794(Golgi apparatus);GO:0006486(protein glycosylation);GO:0016020(membrane);GO:0016021(integral component of membrane);GO:0016757(transferase activity, transferring glycosyl groups);GO:0071555(cell wall organization)	NA	NA	NA	unnamed protein product, partial [Vitis vinifera]	NA	1.92807	2.45601	2.62887	32.7564	22.6984	22.12	2.56139	1.74589	4.43655	7.41929e-29	3.97338e-27	yes
gene-GIB67_043223	GIB67_043223	4797	rna-gnl|WGS:JACGCM|KingUnif21902.1	GO:0004674(protein serine/threonine kinase activity);GO:0005886(plasma membrane);GO:0006468(protein phosphorylation)	NA	NA	NA	hypothetical protein AQUCO_02600432v1 [Aquilegia coerulea]	NA	0.27224	0.186023	0.47213	13.1578	8.29426	10.1734	9.30777	5.63382	7.08427	7.519e-29	4.01632e-27	yes
gene-GIB67_018626	GIB67_018626	28088	rna-gnl|WGS:JACGCM|KingUnif34130.1	GO:0004970(ionotropic glutamate receptor activity);GO:0005217(intracellular ligand-gated ion channel activity);GO:0005634(nucleus);GO:0005773(vacuole);GO:0006874(cellular calcium ion homeostasis);GO:0009416(response to light stimulus);GO:0016021(integral component of membrane)	NA	NA	NA	PREDICTED: glutamate receptor 2.7-like [Nelumbo nucifera]	NA	0.949387	1.25391	1.79861	11.5064	16.3077	14.7638	2.75038	1.82974	1.75102	7.96043e-29	4.24109e-27	yes
gene-GIB67_036789	GIB67_036789	30178	rna-gnl|WGS:JACGCM|KingUnif26867.1	GO:0004674(protein serine/threonine kinase activity);GO:0005886(plasma membrane)	NA	NA	NA	Protein kinase domain [Macleaya cordata]	NA	0.757453	0.533831	1.388	19.2887	19.0774	25.8858	10.169	8.64351	7.88054	7.99853e-29	4.25038e-27	yes
gene-GIB67_005481	GIB67_005481	10591	rna-gnl|WGS:JACGCM|KingUnif23177.1	GO:0005634(nucleus);GO:0008150(biological_process)	NA	NA	NA	Leucine-rich repeat [Macleaya cordata]	NA	6.17983	4.94775	6.0322	54.2853	44.5943	47.5716	19.1524	21.6959	13.8354	8.10801e-29	4.29746e-27	yes
gene-GIB67_005693	GIB67_005693	10455	rna-gnl|WGS:JACGCM|KingUnif20851.1	GO:0005543(phospholipid binding);GO:0005739(mitochondrion);GO:0005794(Golgi apparatus);GO:0005905(clathrin-coated pit);GO:0006897(endocytosis);GO:0030136(clathrin-coated vesicle)	NA	NA	NA	AP180 N-terminal homology (ANTH) domain [Macleaya cordata]	NA	0.690991	0.805927	1.54461	53.9129	27.9159	34.2252	8.27806	10.1076	3.81659	8.32071e-29	4.39885e-27	yes
gene-GIB67_019446	GIB67_019446	18767	rna-gnl|WGS:JACGCM|KingUnif32723.1	GO:0003674(molecular_function);GO:0005739(mitochondrion);GO:0005783(endoplasmic reticulum);GO:0005789(endoplasmic reticulum membrane);GO:0016021(integral component of membrane);GO:0090693(plant organ senescence)	NA	NA	NA	hypothetical protein AQUCO_02300059v1 [Aquilegia coerulea]	NA	5.43779	8.53709	7.84929	105.375	64.5435	161.736	28.2978	22.2985	20.202	8.96971e-29	4.7298e-27	yes
gene-GIB67_039404	GIB67_039404	34593	rna-gnl|WGS:JACGCM|KingUnif36859.1	GO:0005773(vacuole);GO:0005794(Golgi apparatus);GO:0005886(plasma membrane);GO:0006950(response to stress);GO:0016787(hydrolase activity)	NA	NA	NA	hypothetical protein AQUCO_00300741v1 [Aquilegia coerulea]	NA	123.228	88.6611	130.204	708.743	822.31	754.494	130.365	119.891	128.94	9.18749e-29	4.83224e-27	yes
gene-GIB67_042995	GIB67_042995	6845	rna-gnl|WGS:JACGCM|KingUnif42534.1	GO:0000786(nucleosome);GO:0003677(DNA binding);GO:0005634(nucleus);GO:0006334(nucleosome assembly);GO:0031492(nucleosomal DNA binding)	NA	NA	NA	histone H3.3 isoform X1 [Cucurbita maxima]	NA	18.6217	12.1402	16.4097	149.804	179.817	148.953	71.9983	86.7192	50.7325	9.49028e-29	4.97877e-27	yes
gene-GIB67_005768	GIB67_005768	42841	rna-gnl|WGS:JACGCM|KingUnif38273.1	NA	NA	NA	NA	PREDICTED: protein NETWORKED 3A-like [Nelumbo nucifera]	NA	0.242713	0	0.127997	22.9228	26.5138	17.1972	0	0	0	9.94333e-29	5.20317e-27	yes
gene-GIB67_011047	GIB67_011047	38982	rna-gnl|WGS:JACGCM|KingUnif31993.1	GO:0004674(protein serine/threonine kinase activity);GO:0005886(plasma membrane);GO:0007166(cell surface receptor signaling pathway)	NA	NA	NA	hypothetical protein AQUCO_02200336v1 [Aquilegia coerulea]	NA	1.10165	1.08747	2.80423	39.047	33.3036	57.3231	8.90195	10.8244	6.64625	1.18795e-28	6.20055e-27	yes
gene-GIB67_001017	GIB67_001017	23414	rna-gnl|WGS:JACGCM|KingUnif21620.1	GO:0003674(molecular_function);GO:0005634(nucleus);GO:0005737(cytoplasm);GO:0005829(cytosol);GO:0010043(response to zinc ion)	NA	NA	NA	hypothetical protein COLO4_05356 [Corchorus olitorius]	NA	3.57773	2.95757	6.64048	36.1152	35.9964	34.8468	5.29861	6.13558	4.74013	1.19741e-28	6.23412e-27	yes
gene-GIB67_006262	GIB67_006262	2565	rna-gnl|WGS:JACGCM|KingUnif41633.1	GO:0005739(mitochondrion);GO:0005777(peroxisome);GO:0019605(butyrate metabolic process);GO:0047760(butyrate-CoA ligase activity)	NA	NA	NA	hypothetical protein AQUCO_00201386v1 [Aquilegia coerulea]	NA	0.547469	0.583999	1.4484	23.0935	18.1201	45.1522	5.63142	6.89097	5.42881	1.49155e-28	7.74588e-27	yes
gene-GIB67_005265	GIB67_005265	8638	rna-gnl|WGS:JACGCM|KingUnif07909.1	GO:0004364(glutathione transferase activity);GO:0005737(cytoplasm);GO:0006749(glutathione metabolic process);GO:0009407(toxin catabolic process)	00480(Glutathione metabolism)	K00799	EC:2.5.1.18	Glutathione S-transferase [Macleaya cordata]	NA	3.51247	1.99286	6.49799	121.137	168.225	149.938	108.796	72.3948	43.3157	1.49561e-28	7.74741e-27	yes
gene-GIB67_001997	GIB67_001997	25464	rna-gnl|WGS:JACGCM|KingUnif04108.1	GO:0000287(magnesium ion binding);GO:0003824(catalytic activity);GO:0005524(ATP binding);GO:0005829(cytosol);GO:0010264(myo-inositol hexakisphosphate biosynthetic process);GO:0032957(inositol trisphosphate metabolic process);GO:0047325(inositol tetrakisphosphate 1-kinase activity);GO:0052725(inositol-1,3,4-trisphosphate 6-kinase activity);GO:0052726(inositol-1,3,4-trisphosphate 5-kinase activity)…	00562(Inositol phosphate metabolism);04070(Phosphatidylinositol signaling system)	K00913	EC:2.7.1.159;EC:2.7.1.134	hypothetical protein AQUCO_00500495v1 [Aquilegia coerulea]	NA	15.2247	13.7377	15.5774	84.5672	97.0032	154.423	21.6456	25.943	16.8954	1.51292e-28	7.81738e-27	yes
gene-GIB67_021257	GIB67_021257	35787	rna-gnl|WGS:JACGCM|KingUnif35018.1	GO:0004108(citrate (Si)-synthase activity);GO:0005777(peroxisome);GO:0006099(tricarboxylic acid cycle);GO:0006635(fatty acid beta-oxidation);GO:0009506(plasmodesma)	00020(Citrate cycle (TCA cycle));00630(Glyoxylate and dicarboxylate metabolism)	K01647	EC:2.3.3.1	PREDICTED: citrate synthase, glyoxysomal [Juglans regia]	NA	0	0	0	9.02296	3.76625	2.75163	7.86077	7.18162	10.1976	1.60062e-28	8.24983e-27	yes
gene-GIB67_017885	GIB67_017885	21685	rna-gnl|WGS:JACGCM|KingUnif23939.1	GO:0004842(ubiquitin-protein transferase activity);GO:0005515(protein binding);GO:0005634(nucleus);GO:0005737(cytoplasm);GO:0006355(regulation of transcription, DNA-templated);GO:0006511(ubiquitin-dependent protein catabolic process);GO:0007623(circadian rhythm);GO:0009637(response to blue light);GO:0009881(photoreceptor activity);GO:0009908(flower development);GO:0009911(positive regulation of f…	04712(Circadian rhythm - plant)	K12116	NA	putative LOV domain-containing protein [Platanus occidentalis]	NA	4.25592	4.27398	1.29827	42.8276	44.5479	27.6851	0.988771	1.92856	2.50447	1.76414e-28	9.06986e-27	yes
gene-GIB67_000334	GIB67_000334	36973	rna-gnl|WGS:JACGCM|KingUnif19708.1	GO:0009507(chloroplast)	NA	NA	NA	PREDICTED: uncharacterized protein ycf45 [Nelumbo nucifera]	NA	38.0369	35.2925	47.0723	656.66	266.762	557.142	63.7272	61.4095	72.6613	2.00974e-28	1.03068e-26	yes
gene-GIB67_005304	GIB67_005304	36812	rna-gnl|WGS:JACGCM|KingUnif42228.1	GO:0003674(molecular_function);GO:0005576(extracellular region);GO:0005783(endoplasmic reticulum);GO:0008150(biological_process);GO:0009507(chloroplast);GO:0009579(thylakoid);GO:0016020(membrane)	NA	NA	NA	hypothetical protein AQUCO_01400652v1 [Aquilegia coerulea]	NA	270.468	272.25	169.386	12.2628	18.0421	9.66395	98.251	67.0319	135.477	2.07819e-28	1.06313e-26	yes
gene-GIB67_042000	GIB67_042000	4536	rna-gnl|WGS:JACGCM|KingUnif22481.1	GO:0006952(defense response)	03013(RNA transport)	K03239	NA	LURP1-like domain [Macleaya cordata]	NA	32.5488	25.8877	45.742	434.329	402.474	372.235	121.588	118.202	162.113	2.37375e-28	1.21132e-26	yes
gene-GIB67_011581	GIB67_011581	9107	rna-gnl|WGS:JACGCM|KingUnif29343.1	GO:0000103(sulfate assimilation);GO:0004604(phosphoadenylyl-sulfate reductase (thioredoxin) activity);GO:0009507(chloroplast);GO:0009973(adenylyl-sulfate reductase activity);GO:0016671(oxidoreductase activity, acting on a sulfur group of donors, disulfide as acceptor);GO:0019344(cysteine biosynthetic process);GO:0019419(sulfate reduction);GO:0033741(adenylyl-sulfate reductase (glutathione) activi…	00920(Sulfur metabolism)	K05907	EC:1.8.4.9	PREDICTED: 5'-adenylylsulfate reductase 3, chloroplastic-like [Vitis vinifera]	NA	36.4973	37.4959	77.5668	1445.13	1380.05	1293.27	559.701	694.928	682.634	2.41161e-28	1.22759e-26	yes
gene-GIB67_010424	GIB67_010424	25243	rna-gnl|WGS:JACGCM|KingUnif17936.1	GO:0008150(biological_process);GO:0009507(chloroplast);GO:0016021(integral component of membrane)	NA	NA	NA	hypothetical protein AQUCO_11500001v1 [Aquilegia coerulea]	NA	137.599	167.052	258.252	26.7047	31.5943	22.2032	534.787	499.717	293.092	2.88726e-28	1.46609e-26	yes
gene-GIB67_009445	GIB67_009445	15775	rna-gnl|WGS:JACGCM|KingUnif18050.1	GO:0003677(DNA binding);GO:0003700(DNA binding transcription factor activity);GO:0005515(protein binding);GO:0005634(nucleus);GO:0006351(transcription, DNA-templated);GO:0007275(multicellular organism development);GO:0009651(response to salt stress);GO:0009737(response to abscisic acid);GO:0010089(xylem development);GO:0010150(leaf senescence);GO:0016032(viral process);GO:0045892(negative regulat…	NA	NA	NA	PREDICTED: NAC domain-containing protein 18 [Cucumis sativus]	NA	20.8258	18.0676	18.4109	256.929	200.097	151.86	109.893	97.963	79.2965	3.10577e-28	1.57315e-26	yes
gene-GIB67_039013	GIB67_039013	33859	rna-gnl|WGS:JACGCM|KingUnif19600.1	GO:0004364(glutathione transferase activity);GO:0005737(cytoplasm);GO:0006749(glutathione metabolic process);GO:0009407(toxin catabolic process)	00480(Glutathione metabolism)	K00799	EC:2.5.1.18	Glutathione S-transferase [Macleaya cordata]	NA	21.5146	20.82	29.8216	231.832	225.646	361.491	47.5807	82.6164	42.4181	3.20182e-28	1.61783e-26	yes
gene-GIB67_026798	GIB67_026798	22886	rna-gnl|WGS:JACGCM|KingUnif14493.1	GO:0003333(amino acid transmembrane transport);GO:0015171(amino acid transmembrane transporter activity)	NA	NA	NA	hypothetical protein AQUCO_00700912v1 [Aquilegia coerulea]	NA	22.7752	18.7408	27.2533	148.089	110.567	142.906	27.5267	27.4731	19.3056	3.4741e-28	1.7511e-26	yes
gene-GIB67_042752	GIB67_042752	40872	rna-gnl|WGS:JACGCM|KingUnif22328.1	GO:0005829(cytosol);GO:0008757(S-adenosylmethionine-dependent methyltransferase activity);GO:0032259(methylation)	NA	NA	NA	Leucine carboxyl methyltransferase [Macleaya cordata]	NA	2.38105	1.4893	2.43597	14.3915	36.5663	29.5889	1.01937	0.89886	2.20019	3.71661e-28	1.86875e-26	yes
gene-GIB67_009594	GIB67_009594	27610	rna-gnl|WGS:JACGCM|KingUnif25207.1	GO:0016021(integral component of membrane);GO:0042626(ATPase activity, coupled to transmembrane movement of substances);GO:0055085(transmembrane transport)	02010(ABC transporters)	K05658	EC:3.6.3.44	PREDICTED: ABC transporter B family member 15-like [Nelumbo nucifera]	NA	0.268763	0.178043	0.379276	4.96181	5.28876	7.55197	1.47639	1.77472	1.4247	3.74734e-28	1.87961e-26	yes
gene-GIB67_003152	GIB67_003152	14648	rna-gnl|WGS:JACGCM|KingUnif42807.1	GO:0004565(beta-galactosidase activity);GO:0005618(cell wall);GO:0005773(vacuole)	00052(Galactose metabolism);00600(Sphingolipid metabolism);00531(Glycosaminoglycan degradation);00604(Glycosphingolipid biosynthesis - ganglio series);00511(Other glycan degradation)	K12309	EC:3.2.1.23	D-galactoside/L-rhamnose binding SUEL lectin domain [Macleaya cordata]	NA	2.90575	5.87403	2.24131	0	0	0	0	0	0	3.90629e-28	1.95457e-26	yes
gene-GIB67_027152	GIB67_027152	3937	rna-gnl|WGS:JACGCM|KingUnif32671.1	NA	NA	NA	NA	PREDICTED: transcription factor bHLH92-like [Nelumbo nucifera]	NA	0.716329	0.360261	1.55344	34.8813	26.4782	57.1116	1.83454	3.84408	1.31441	4.60315e-28	2.29767e-26	yes
gene-GIB67_042242	GIB67_042242	36295	rna-gnl|WGS:JACGCM|KingUnif23230.1	GO:0004176(ATP-dependent peptidase activity);GO:0005524(ATP binding);GO:0005759(mitochondrial matrix);GO:0006508(proteolysis);GO:0030163(protein catabolic process)	NA	NA	NA	PREDICTED: CLP protease regulatory subunit CLPX1, mitochondrial isoform X1 [Nelumbo nucifera]	NA	4.95714	6.37714	7.23057	50.8315	39.025	48.6006	15.4729	12.3245	14.2902	4.68237e-28	2.33155e-26	yes
gene-GIB67_025352	GIB67_025352	12721	rna-gnl|WGS:JACGCM|KingUnif05448.1	GO:0000166(nucleotide binding);GO:0003677(DNA binding);GO:0003914(DNA (6-4) photolyase activity);GO:0005634(nucleus);GO:0006281(DNA repair);GO:0009411(response to UV);GO:0009507(chloroplast)	NA	NA	NA	PREDICTED: (6-4)DNA photolyase [Nelumbo nucifera]	NA	1.30973	0.619625	2.72589	31.2167	30.2736	42.2738	3.15026	1.6752	3.69838	5.30038e-28	2.63291e-26	yes
gene-GIB67_034975	GIB67_034975	10808	rna-gnl|WGS:JACGCM|KingUnif37553.1	GO:0003824(catalytic activity);GO:0005515(protein binding);GO:0005768(endosome);GO:0005794(Golgi apparatus);GO:0005802(trans-Golgi network);GO:0009225(nucleotide-sugar metabolic process);GO:0016021(integral component of membrane);GO:0032580(Golgi cisterna membrane);GO:0033481(galacturonate biosynthetic process);GO:0050378(UDP-glucuronate 4-epimerase activity);GO:0050829(defense response to Gram-n…	00520(Amino sugar and nucleotide sugar metabolism)	K08679	EC:5.1.3.6	PREDICTED: UDP-glucuronate 4-epimerase 6-like [Nelumbo nucifera]	NA	53.036	20.0371	62.3108	2.08981	2.55824	1.24832	40.8123	47.6536	39.2138	5.79225e-28	2.8703e-26	yes
gene-GIB67_034873	GIB67_034873	24146	rna-gnl|WGS:JACGCM|KingUnif33050.1	GO:0006744(ubiquinone biosynthetic process);GO:0008299(isoprenoid biosynthetic process);GO:0009507(chloroplast);GO:0009536(plastid);GO:0009570(chloroplast stroma);GO:0010236(plastoquinone biosynthetic process);GO:0015979(photosynthesis);GO:0046872(metal ion binding);GO:0050347(trans-octaprenyltranstransferase activity);GO:0052924(all-trans-nonaprenyl-diphosphate synthase (geranylgeranyl-diphospha…	00900(Terpenoid backbone biosynthesis)	K05356	EC:2.5.1.84;EC:2.5.1.85	Polyprenyl synthetase [Macleaya cordata]	NA	2.89189	2.65231	3.70356	20.431	30.1721	25.7211	3.18019	2.20231	5.11743	5.99598e-28	2.96412e-26	yes
gene-GIB67_020131	GIB67_020131	4565	rna-gnl|WGS:JACGCM|KingUnif39047.1	GO:0005886(plasma membrane);GO:0015079(potassium ion transmembrane transporter activity)	NA	NA	NA	Potassium transporter 2 [Cinnamomum micranthum f. kanehirae]	NA	5.9301	4.35433	13.4658	124.784	143.397	128.536	22.3141	16.4924	10.0015	6.51849e-28	3.21469e-26	yes
gene-GIB67_037440	GIB67_037440	10239	rna-gnl|WGS:JACGCM|KingUnif06783.1	GO:0004462(lactoylglutathione lyase activity);GO:0005516(calmodulin binding);GO:0005829(cytosol);GO:0005975(carbohydrate metabolic process);GO:0009507(chloroplast);GO:0019243(methylglyoxal catabolic process to D-lactate via S-lactoyl-glutathione);GO:0046686(response to cadmium ion);GO:0046872(metal ion binding)	00620(Pyruvate metabolism)	K01759	EC:4.4.1.5	PREDICTED: lactoylglutathione lyase isoform X1 [Nelumbo nucifera]	NA	25.0574	19.3829	27.6873	2.54376	2.50869	2.15218	23.9796	36.4486	22.4486	6.63548e-28	3.26456e-26	yes
gene-GIB67_026947	GIB67_026947	3737	rna-gnl|WGS:JACGCM|KingUnif15968.1	GO:0000139(Golgi membrane);GO:0000271(polysaccharide biosynthetic process);GO:0000977(RNA polymerase II regulatory region sequence-specific DNA binding);GO:0005794(Golgi apparatus);GO:0005886(plasma membrane);GO:0009833(plant-type primary cell wall biogenesis);GO:0016021(integral component of membrane);GO:0016740(transferase activity);GO:0016757(transferase activity, transferring glycosyl groups)…	NA	NA	NA	Cellulose synthase [Macleaya cordata]	NA	0.770561	1.54383	1.89898	246.748	82.9437	74.56	37.9779	12.0161	15.6911	6.8112e-28	3.34302e-26	yes
gene-GIB67_021496	GIB67_021496	37863	rna-gnl|WGS:JACGCM|KingUnif29879.1	GO:0008168(methyltransferase activity);GO:0032259(methylation)	NA	NA	NA	Methyltransferase-related protein [Zostera marina]	NA	2.95575	2.22282	3.15647	36.2035	39.7151	47.5858	6.34183	4.50827	3.09084	7.07916e-28	3.46626e-26	yes
gene-GIB67_034068	GIB67_034068	26872	rna-gnl|WGS:JACGCM|KingUnif26427.1	GO:0003674(molecular_function);GO:0005634(nucleus)	NA	NA	NA	PREDICTED: uncharacterized protein At4g22758 [Nelumbo nucifera]	NA	22.6222	10.0454	17.7392	0.356986	0.400264	0.093671	1.47606	1.94792	1.02716	7.66911e-28	3.74621e-26	yes
gene-GIB67_014546	GIB67_014546	34203	rna-gnl|WGS:JACGCM|KingUnif08148.1	NA	00190(Oxidative phosphorylation);04145(Phagosome)	K02150	NA	hypothetical protein BVC80_27g8 [Macleaya cordata]	NA	12.375	41.0857	13.7573	0.902859	0.602062	0.459987	1.82122	2.85522	1.36207	9.21815e-28	4.49221e-26	yes
gene-GIB67_025976	GIB67_025976	38388	rna-gnl|WGS:JACGCM|KingUnif31204.1	NA	NA	NA	NA	putative disease resistance protein RGA3 isoform X1 [Citrus sinensis]	NA	4.66827	5.05162	2.9958	43.8757	52.3318	39.7807	2.35084	3.37934	6.12775	1.0213e-27	4.96524e-26	yes
gene-GIB67_015835	GIB67_015835	11646	rna-gnl|WGS:JACGCM|KingUnif26248.1	NA	NA	NA	NA	hypothetical protein AQUCO_01400857v1 [Aquilegia coerulea]	NA	0.386543	0.269841	0.963854	83.894	21.4218	117.394	5.33791	5.4026	3.36537	1.12976e-27	5.4796e-26	yes
gene-GIB67_036205	GIB67_036205	39567	rna-gnl|WGS:JACGCM|KingUnif24647.1	GO:0004674(protein serine/threonine kinase activity);GO:0005886(plasma membrane)	NA	NA	NA	hypothetical protein AQUCO_08200044v1 [Aquilegia coerulea]	NA	1.11877	0.426365	0.891827	19.7361	19.5423	40.358	6.69315	6.88665	3.69497	1.28404e-27	6.21326e-26	yes
gene-GIB67_039598	GIB67_039598	2161	rna-gnl|WGS:JACGCM|KingUnif39968.1	NA	NA	NA	NA	PREDICTED: uncharacterized protein LOC105803178 [Gossypium raimondii]	NA	0	0	0.404453	30.0877	21.4264	29.4414	1.05408	1.34035	0.743389	1.42358e-27	6.87229e-26	yes
gene-GIB67_041176	GIB67_041176	34183	rna-gnl|WGS:JACGCM|KingUnif33319.1	GO:0004674(protein serine/threonine kinase activity);GO:0005515(protein binding);GO:0005524(ATP binding);GO:0005634(nucleus);GO:0005773(vacuole);GO:0005886(plasma membrane);GO:0009506(plasmodesma);GO:0016301(kinase activity);GO:0018105(peptidyl-serine phosphorylation);GO:0018107(peptidyl-threonine phosphorylation);GO:0035556(intracellular signal transduction)	NA	NA	NA	Protein kinase domain [Macleaya cordata]	NA	0.603315	0.674081	1.17571	46.6197	24.9162	60.0244	7.85025	2.85202	1.85929	1.48785e-27	7.16573e-26	yes
gene-GIB67_038930	GIB67_038930	32378	rna-gnl|WGS:JACGCM|KingUnif01987.1	GO:0000302(response to reactive oxygen species);GO:0004322(ferroxidase activity);GO:0005506(iron ion binding);GO:0005739(mitochondrion);GO:0006826(iron ion transport);GO:0006879(cellular iron ion homeostasis);GO:0006880(intracellular sequestering of iron ion);GO:0008199(ferric iron binding);GO:0009507(chloroplast);GO:0009570(chloroplast stroma);GO:0009908(flower development);GO:0009941(chloroplas…	NA	NA	NA	ferritin-3, chloroplastic-like isoform X2 [Hevea brasiliensis]	NA	138.953	162.751	69.9333	638.677	567.979	912.138	32.301	29.8016	51.9668	1.54531e-27	7.42507e-26	yes
gene-GIB67_003487	GIB67_003487	23745	rna-gnl|WGS:JACGCM|KingUnif02763.1	GO:0005515(protein binding);GO:0009507(chloroplast);GO:0009528(plastid inner membrane);GO:0009706(chloroplast inner membrane);GO:0010020(chloroplast fission);GO:0016021(integral component of membrane);GO:0043572(plastid fission);GO:0043621(protein self-association)	NA	NA	NA	protein of unknown function DUF4101 [Macleaya cordata]	NA	41.5856	82.1036	32.2315	4.01557	4.49822	5.96313	6.63072	7.07138	4.9372	1.63508e-27	7.8381e-26	yes
gene-GIB67_006091	GIB67_006091	32523	rna-gnl|WGS:JACGCM|KingUnif05035.1	GO:0016020(membrane);GO:0016709(oxidoreductase activity, acting on paired donors, with incorporation or reduction of molecular oxygen, NAD(P)H as one donor, and incorporation of one atom of oxygen);GO:0044550(secondary metabolite biosynthetic process)	NA	NA	NA	hypothetical protein AQUCO_15200005v1 [Aquilegia coerulea]	NA	0.134841	0.210524	0.506272	16.0993	13.5677	33.237	1.02842	0.259134	0.180897	1.79627e-27	8.59077e-26	yes
gene-GIB67_003666	GIB67_003666	27636	rna-gnl|WGS:JACGCM|KingUnif27006.1	GO:0003333(amino acid transmembrane transport);GO:0005886(plasma membrane);GO:0015171(amino acid transmembrane transporter activity)	NA	NA	NA	hypothetical protein AQUCO_01100420v1 [Aquilegia coerulea]	NA	0.25551	0.340782	1.27288	42.9376	39.6622	49.4944	13.4898	20.3343	7.87974	1.8483e-27	8.81909e-26	yes
gene-GIB67_026315	GIB67_026315	14703	rna-gnl|WGS:JACGCM|KingUnif17382.1	GO:0004553(hydrolase activity, hydrolyzing O-glycosyl compounds);GO:0005576(extracellular region);GO:0005618(cell wall);GO:0009414(response to water deprivation);GO:0010411(xyloglucan metabolic process);GO:0016762(xyloglucan:xyloglucosyl transferase activity);GO:0016798(hydrolase activity, acting on glycosyl bonds);GO:0042546(cell wall biogenesis);GO:0048046(apoplast);GO:0071555(cell wall organiz…	NA	NA	NA	hypothetical protein AQUCO_01600256v1 [Aquilegia coerulea]	NA	70.9528	35.7467	36.9045	0.595018	0.382864	0.963056	3.82207	12.7727	17.3811	2.07902e-27	9.89699e-26	yes
gene-GIB67_011330	GIB67_011330	20700	rna-gnl|WGS:JACGCM|KingUnif11429.1	GO:0003674(molecular_function);GO:0005634(nucleus)	NA	NA	NA	uncharacterized protein LOC105162997 [Sesamum indicum]	NA	12.2623	10.4275	14.7632	38.9788	33.605	24.7578	126.615	121.018	83.3822	2.11211e-27	1.00313e-25	yes
gene-GIB67_011056	GIB67_011056	38990	rna-gnl|WGS:JACGCM|KingUnif14210.1	GO:0005576(extracellular region);GO:0005615(extracellular space);GO:0009690(cytokinin metabolic process);GO:0009823(cytokinin catabolic process);GO:0016614(oxidoreductase activity, acting on CH-OH group of donors);GO:0019139(cytokinin dehydrogenase activity);GO:0050660(flavin adenine dinucleotide binding);GO:0055114(oxidation-reduction process)	00908(Zeatin biosynthesis)	K00279	EC:1.5.99.12	hypothetical protein AQUCO_00700318v1 [Aquilegia coerulea]	NA	0.965575	1.27426	2.05708	1.8605	0.929968	1.1249	24.4993	11.7299	21.5256	2.14789e-27	1.01777e-25	yes
gene-GIB67_011497	GIB67_011497	9017	rna-gnl|WGS:JACGCM|KingUnif00406.1	GO:0004683(calmodulin-dependent protein kinase activity);GO:0005516(calmodulin binding);GO:0005634(nucleus);GO:0005737(cytoplasm);GO:0009738(abscisic acid-activated signaling pathway);GO:0009931(calcium-dependent protein serine/threonine kinase activity);GO:0018105(peptidyl-serine phosphorylation);GO:0035556(intracellular signal transduction);GO:0046777(protein autophosphorylation)	04626(Plant-pathogen interaction)	K13412	EC:2.7.11.1	calcium-dependent protein kinase 2-like protein [Cinnamomum micranthum f. kanehirae]	NA	3.56774	3.54874	2.25232	26.1055	31.2852	24.4545	8.82306	6.82987	7.34166	2.18072e-27	1.03096e-25	yes
gene-GIB67_015450	GIB67_015450	41721	rna-gnl|WGS:JACGCM|KingUnif02102.1	GO:0005737(cytoplasm);GO:0005829(cytosol);GO:0005886(plasma membrane);GO:0016311(dephosphorylation);GO:0016787(hydrolase activity);GO:0046872(metal ion binding);GO:0050308(sugar-phosphatase activity)	00740(Riboflavin metabolism)	K20884	EC:2.7.1.26;EC:3.1.3.102	PREDICTED: haloacid dehalogenase-like hydrolase domain-containing protein Sgpp isoform X1 [Nelumbo nucifera]	NA	17.9264	17.4846	23.6664	156.113	123.764	140.494	43.0131	49.7742	34.7028	2.21328e-27	1.04395e-25	yes
gene-GIB67_025347	GIB67_025347	12716	rna-gnl|WGS:JACGCM|KingUnif10074.1	GO:0003674(molecular_function);GO:0005576(extracellular region);GO:0005618(cell wall);GO:0008150(biological_process);GO:0009505(plant-type cell wall)	03008(Ribosome biogenesis in eukaryotes);04712(Circadian rhythm - plant)	K03097	EC:2.7.11.1	Protein of unknown function DUF642 [Macleaya cordata]	NA	230.266	66.0736	10.8112	0.129519	1.1678	0.423748	0.255948	0.34757	0.134932	2.24919e-27	1.05846e-25	yes
gene-GIB67_030996	GIB67_030996	31657	rna-gnl|WGS:JACGCM|KingUnif07102.1	GO:0000139(Golgi membrane);GO:0000271(polysaccharide biosynthetic process);GO:0005794(Golgi apparatus);GO:0016021(integral component of membrane);GO:0016051(carbohydrate biosynthetic process);GO:0016757(transferase activity, transferring glycosyl groups);GO:0016758(transferase activity, transferring hexosyl groups);GO:0045489(pectin biosynthetic process);GO:0047262(polygalacturonate 4-alpha-galac…	NA	NA	NA	probable galacturonosyltransferase-like 9 [Morus notabilis]	NA	3.42815	1.45196	2.85713	27.6335	26.9159	30.0955	2.78091	2.91529	2.29457	2.36351e-27	1.10971e-25	yes
gene-GIB67_000952	GIB67_000952	23356	rna-gnl|WGS:JACGCM|KingUnif06813.1	GO:0016787(hydrolase activity)	NA	NA	NA	PREDICTED: probable lysophospholipase BODYGUARD 2 [Nelumbo nucifera]	NA	1.26992	0.560942	1.42528	0.775993	3.00041	1.71582	30.5323	27.5418	17.8997	2.4435e-27	1.14466e-25	yes
gene-GIB67_031063	GIB67_031063	33424	rna-gnl|WGS:JACGCM|KingUnif17020.1	GO:0005737(cytoplasm);GO:0006457(protein folding);GO:0051082(unfolded protein binding)	NA	NA	NA	dnaJ homolog subfamily B member 13-like [Durio zibethinus]	NA	1654.09	2128.13	1563.59	66.0011	60.6061	24.9595	646.078	819.045	452.297	2.5777e-27	1.20478e-25	yes
gene-GIB67_023597	GIB67_023597	39472	rna-gnl|WGS:JACGCM|KingUnif17867.1	GO:0016020(membrane);GO:0016709(oxidoreductase activity, acting on paired donors, with incorporation or reduction of molecular oxygen, NAD(P)H as one donor, and incorporation of one atom of oxygen);GO:0042343(indole glucosinolate metabolic process);GO:0044550(secondary metabolite biosynthetic process);GO:0098542(defense response to other organism)	NA	NA	NA	CYP81B57 [Sinopodophyllum hexandrum]	NA	3.49003	3.82118	2.36944	54.6158	37.1604	31.2481	4.13492	3.6116	3.70787	2.77684e-27	1.29491e-25	yes
gene-GIB67_006340	GIB67_006340	4146	rna-gnl|WGS:JACGCM|KingUnif21850.1	GO:0000325(plant-type vacuole);GO:0005524(ATP binding);GO:0005774(vacuolar membrane);GO:0005886(plasma membrane);GO:0008559(xenobiotic transmembrane transporting ATPase activity);GO:0016021(integral component of membrane);GO:0042626(ATPase activity, coupled to transmembrane movement of substances);GO:0055085(transmembrane transport)	02010(ABC transporters)	K05666	NA	PREDICTED: multidrug resistance-associated protein 1 isoform X1 [Vitis vinifera]	NA	0.54715	0.422351	0.985527	9.20021	7.20658	14.6663	1.26864	0.506027	0.75187	3.40686e-27	1.58512e-25	yes
gene-GIB67_005579	GIB67_005579	37719	rna-gnl|WGS:JACGCM|KingUnif21490.1	GO:0019745(pentacyclic triterpenoid biosynthetic process);GO:0042299(lupeol synthase activity)	00909(Sesquiterpenoid and triterpenoid biosynthesis)	K20659	EC:5.4.99.41	beta-amyrin synthase [Nigella sativa]	NA	0	0	0	0	0	0	13.8286	7.29117	20.0391	3.73691e-27	1.73475e-25	yes
gene-GIB67_037823	GIB67_037823	13124	rna-gnl|WGS:JACGCM|KingUnif06983.1	GO:0000139(Golgi membrane);GO:0003824(catalytic activity);GO:0005794(Golgi apparatus);GO:0006486(protein glycosylation);GO:0016020(membrane);GO:0016021(integral component of membrane);GO:0016757(transferase activity, transferring glycosyl groups);GO:0071555(cell wall organization)	NA	NA	NA	unnamed protein product, partial [Vitis vinifera]	NA	1.79849	2.31102	2.50834	31.4292	21.2877	21.3916	2.0642	1.515	4.1687	4.84614e-27	2.24461e-25	yes
gene-GIB67_008437	GIB67_008437	15055	rna-gnl|WGS:JACGCM|KingUnif13045.1	GO:0009813(flavonoid biosynthetic process);GO:0043231(intracellular membrane-bounded organelle);GO:0052696(flavonoid glucuronidation);GO:0080043(quercetin 3-O-glucosyltransferase activity);GO:0080044(quercetin 7-O-glucosyltransferase activity)	NA	NA	NA	hypothetical protein AQUCO_00200093v1 [Aquilegia coerulea]	NA	6.17042	3.57946	6.39462	73.2903	134.379	99.9044	47.7054	29.9535	21.3283	5.0119e-27	2.31617e-25	yes
gene-GIB67_028722	GIB67_028722	13174	rna-gnl|WGS:JACGCM|KingUnif32670.1	GO:0004004(ATP-dependent RNA helicase activity);GO:0006413(translational initiation);GO:0007059(chromosome segregation);GO:0010468(regulation of gene expression);GO:0010501(RNA secondary structure unwinding);GO:0036464(cytoplasmic ribonucleoprotein granule)	NA	NA	NA	PREDICTED: DEAD-box ATP-dependent RNA helicase 28 [Nelumbo nucifera]	NA	11.0715	10.3731	8.32364	6.02484	7.71965	5.9036	37.669	54.4532	37.6782	5.50343e-27	2.53762e-25	yes
gene-GIB67_018177	GIB67_018177	8833	rna-gnl|WGS:JACGCM|KingUnif42474.1	NA	NA	NA	NA	Chaperonin-like RbcX [Macleaya cordata]	NA	58.0827	70.6818	119.844	619.408	503.297	714.119	95.6198	114.776	72.1703	6.15579e-27	2.83208e-25	yes
gene-GIB67_042657	GIB67_042657	3641	rna-gnl|WGS:JACGCM|KingUnif09773.1	GO:0005249(voltage-gated potassium channel activity);GO:0005887(integral component of plasma membrane);GO:0042391(regulation of membrane potential)	04626(Plant-pathogen interaction)	K05391	NA	Cyclic nucleotide-binding domain [Macleaya cordata]	NA	2.27038	2.40109	2.38015	23.1932	29.3849	20.3911	10.2382	8.19114	5.33216	6.25253e-27	2.87016e-25	yes
gene-GIB67_023523	GIB67_023523	978	rna-gnl|WGS:JACGCM|KingUnif38456.1	GO:0016020(membrane);GO:0016709(oxidoreductase activity, acting on paired donors, with incorporation or reduction of molecular oxygen, NAD(P)H as one donor, and incorporation of one atom of oxygen);GO:0042343(indole glucosinolate metabolic process);GO:0044550(secondary metabolite biosynthetic process);GO:0098542(defense response to other organism)	NA	NA	NA	hypothetical protein AQUCO_00700787v1 [Aquilegia coerulea]	NA	1.01776	0.824069	1.51685	21.2072	21.5322	18.2802	8.08238	5.89261	3.92451	6.70524e-27	3.07112e-25	yes
gene-GIB67_032623	GIB67_032623	1156	rna-gnl|WGS:JACGCM|KingUnif34600.1	GO:0005737(cytoplasm);GO:0005773(vacuole);GO:0005794(Golgi apparatus);GO:0005829(cytosol);GO:0005886(plasma membrane);GO:0010017(red or far-red light signaling pathway);GO:0020037(heme binding)	NA	NA	NA	Fructokinase-like 1 [Theobroma cacao]	NA	20.8029	7.29299	18.1952	218.122	219.184	204.305	17.68	22.0446	40.2574	6.85179e-27	3.13127e-25	yes
gene-GIB67_025431	GIB67_025431	16254	rna-gnl|WGS:JACGCM|KingUnif29021.1	GO:0004674(protein serine/threonine kinase activity);GO:0005886(plasma membrane);GO:0006468(protein phosphorylation);GO:0006952(defense response);GO:0009506(plasmodesma)	NA	NA	NA	hypothetical protein AQUCO_00500442v1 [Aquilegia coerulea]	NA	0.745317	0.511468	0.649781	10.929	24.0057	21.8821	4.02569	1.58129	3.77813	7.15388e-27	3.26207e-25	yes
gene-GIB67_017605	GIB67_017605	33197	rna-gnl|WGS:JACGCM|KingUnif41411.1	GO:0003993(acid phosphatase activity);GO:0004722(protein serine/threonine phosphatase activity);GO:0005576(extracellular region);GO:0016311(dephosphorylation);GO:0046872(metal ion binding)	NA	NA	NA	PREDICTED: probable purple acid phosphatase 20 [Nelumbo nucifera]	NA	2.05186	0.801446	2.47246	130.011	31.6722	123.708	5.23961	4.24607	1.06298	7.30774e-27	3.32486e-25	yes
gene-GIB67_037820	GIB67_037820	13132	rna-gnl|WGS:JACGCM|KingUnif40498.1	GO:0005515(protein binding);GO:0005524(ATP binding);GO:0005730(nucleolus);GO:0005737(cytoplasm);GO:0005794(Golgi apparatus);GO:0005829(cytosol);GO:0005886(plasma membrane);GO:0006457(protein folding);GO:0009408(response to heat);GO:0016020(membrane);GO:0045087(innate immune response);GO:0051082(unfolded protein binding);GO:0051131(chaperone-mediated protein complex assembly);GO:0071277(cellular r…	04141(Protein processing in endoplasmic reticulum)	K04079	NA	Heat shock protein Hsp90 [Cynara cardunculus var. scolymus]	NA	918.494	1031.56	905.979	39.621	81.9923	49.6663	334.876	485.524	297.282	7.59216e-27	3.44664e-25	yes
gene-GIB67_018176	GIB67_018176	8832	rna-gnl|WGS:JACGCM|KingUnif35002.1	GO:0009570(chloroplast stroma);GO:0044183(protein binding involved in protein folding);GO:0061077(chaperone-mediated protein folding)	NA	NA	NA	PREDICTED: uncharacterized protein LOC108227641 [Daucus carota subsp. sativus]	NA	31.7021	38.4465	62.0858	339.81	245.937	324.321	47.0529	56.8688	37.5931	8.46647e-27	3.83509e-25	yes
gene-GIB67_042289	GIB67_042289	36349	rna-gnl|WGS:JACGCM|KingUnif19599.1	GO:0005737(cytoplasm);GO:0016491(oxidoreductase activity);GO:0055114(oxidation-reduction process)	NA	NA	NA	PREDICTED: 2-alkenal reductase (NADP(+)-dependent) [Vitis vinifera]	NA	18.3341	38.0947	31.1883	394.366	275.799	331.52	58.5636	27.0949	29.1399	9.85409e-27	4.45383e-25	yes
gene-GIB67_037207	GIB67_037207	19483	rna-gnl|WGS:JACGCM|KingUnif34910.1	GO:0003674(molecular_function);GO:0005634(nucleus);GO:0010214(seed coat development);GO:0048354(mucilage biosynthetic process involved in seed coat development)	NA	NA	NA	Protein BYPASS-related [Macleaya cordata]	NA	1.05773	0.563042	2.1442	26.1511	29.7568	30.2109	3.32663	5.07593	4.00807	1.02569e-26	4.62575e-25	yes
gene-GIB67_030410	GIB67_030410	11937	rna-gnl|WGS:JACGCM|KingUnif16939.1	GO:0000325(plant-type vacuole);GO:0005524(ATP binding);GO:0005774(vacuolar membrane);GO:0008559(xenobiotic transmembrane transporting ATPase activity);GO:0009506(plasmodesma);GO:0016021(integral component of membrane);GO:0042626(ATPase activity, coupled to transmembrane movement of substances);GO:0055085(transmembrane transport)	02010(ABC transporters)	K05666	NA	PREDICTED: putative ABC transporter C family member 15 [Nelumbo nucifera]	NA	3.14847	5.89237	5.13058	76.9195	114.127	67.6775	18.3116	5.95088	14.5349	1.07359e-26	4.83114e-25	yes
gene-GIB67_022872	GIB67_022872	2080	rna-gnl|WGS:JACGCM|KingUnif22376.1	GO:0004602(glutathione peroxidase activity);GO:0005739(mitochondrion);GO:0005829(cytosol);GO:0005886(plasma membrane);GO:0006979(response to oxidative stress);GO:0009507(chloroplast);GO:0009651(response to salt stress);GO:0046686(response to cadmium ion);GO:0047066(phospholipid-hydroperoxide glutathione peroxidase activity);GO:0048046(apoplast);GO:0055114(oxidation-reduction process);GO:0098869(c…	00590(Arachidonic acid metabolism);00480(Glutathione metabolism)	K00432	EC:1.11.1.9	putative phospholipid hydroperoxide glutathione peroxidase [Cinnamomum micranthum f. kanehirae]	NA	61.2765	48.8831	61.3355	335.022	341.836	313.376	51.433	49.0677	47.2026	1.16522e-26	5.23206e-25	yes
gene-GIB67_008238	GIB67_008238	14853	rna-gnl|WGS:JACGCM|KingUnif00138.1	GO:0004674(protein serine/threonine kinase activity);GO:0005515(protein binding);GO:0005524(ATP binding);GO:0005634(nucleus);GO:0005886(plasma membrane);GO:0006468(protein phosphorylation);GO:0009506(plasmodesma);GO:0009755(hormone-mediated signaling pathway);GO:0010183(pollen tube guidance);GO:0016020(membrane);GO:0016021(integral component of membrane);GO:0016301(kinase activity);GO:0090406(pol…	NA	NA	NA	putative leucine-rich repeat receptor-like protein kinase [Cinnamomum micranthum f. kanehirae]	NA	1.25879	0.894679	2.9708	35.7134	35.1338	40.6589	7.62325	13.8859	9.98937	1.44991e-26	6.49616e-25	yes
gene-GIB67_037521	GIB67_037521	12793	rna-gnl|WGS:JACGCM|KingUnif21457.1	GO:0000145(exocyst);GO:0002237(response to molecule of bacterial origin);GO:0005515(protein binding);GO:0005634(nucleus);GO:0005829(cytosol);GO:0006887(exocytosis);GO:0006904(vesicle docking involved in exocytosis);GO:0006952(defense response);GO:0009617(response to bacterium);GO:0009620(response to fungus);GO:0012505(endomembrane system);GO:0016020(membrane);GO:0031982(vesicle);GO:0045335(phagoc…	NA	NA	NA	exocyst complex component EXO70H1-like [Papaver somniferum]	NA	3.78414	1.45529	6.00464	55.0198	77.8347	114.649	12.4902	15.8066	13.1345	1.47663e-26	6.60152e-25	yes
gene-GIB67_041908	GIB67_041908	25781	rna-gnl|WGS:JACGCM|KingUnif08831.1	GO:0005737(cytoplasm);GO:0016020(membrane)	00040(Pentose and glucuronate interconversions);00051(Fructose and mannose metabolism)	K01805	EC:5.3.1.5	Xylose isomerase [Macleaya cordata]	NA	0.468921	1.07717	0.763773	52.2349	17.9025	21.2133	8.19293	4.71724	9.24715	1.88082e-26	8.39023e-25	yes
gene-GIB67_023957	GIB67_023957	32645	rna-gnl|WGS:JACGCM|KingUnif37490.1	GO:0000786(nucleosome);GO:0003677(DNA binding);GO:0005634(nucleus);GO:0005730(nucleolus);GO:0005739(mitochondrion);GO:0006334(nucleosome assembly)	NA	NA	NA	PREDICTED: histone H1.2 [Prunus mume]	NA	14.7867	9.35911	11.2161	91.937	143.196	81.5385	28.6945	33.512	23.4157	2.02747e-26	9.02486e-25	yes
gene-GIB67_005006	GIB67_005006	8742	rna-gnl|WGS:JACGCM|KingUnif37106.1	NA	NA	NA	NA		NA	0	0	0	0	0	0	5.99002	3.91314	5.26977	2.04355e-26	9.0768e-25	yes
gene-GIB67_029313	GIB67_029313	13776	rna-gnl|WGS:JACGCM|KingUnif17248.1	GO:0000973(posttranscriptional tethering of RNA polymerase II gene DNA at nuclear periphery);GO:0003723(RNA binding);GO:0006405(RNA export from nucleus);GO:0006606(protein import into nucleus);GO:0008139(nuclear localization sequence binding);GO:0017056(structural constituent of nuclear pore);GO:0034398(telomere tethering at nuclear periphery);GO:0044614(nuclear pore cytoplasmic filaments)	03013(RNA transport)	K14297	NA	putative Serpin family protein [Rosa chinensis]	NA	57.1803	51.8529	24.3828	3.97169	2.2536	2.03725	11.2996	12.1558	15.8458	2.07817e-26	9.2107e-25	yes
gene-GIB67_032767	GIB67_032767	18093	rna-gnl|WGS:JACGCM|KingUnif40371.1	GO:0005737(cytoplasm);GO:0008150(biological_process)	NA	NA	NA	E3 ubiquitin-protein ligase LUL4 [Actinidia chinensis var. chinensis]	NA	0.733371	1.53552	0.956762	29.2974	19.1174	44.6135	1.06974	2.40695	2.57611	2.33166e-26	1.03119e-24	yes
gene-GIB67_011247	GIB67_011247	5995	rna-gnl|WGS:JACGCM|KingUnif34365.1	GO:0005886(plasma membrane)	NA	NA	NA	Kinase, putative [Theobroma cacao]	NA	0.292977	0.214852	0.290119	18.8915	9.55107	14.8427	1.39925	4.86967	4.87718	2.43099e-26	1.07282e-24	yes
gene-GIB67_029403	GIB67_029403	5063	rna-gnl|WGS:JACGCM|KingUnif16671.1	GO:0005524(ATP binding);GO:0005618(cell wall);GO:0005634(nucleus);GO:0005739(mitochondrion);GO:0005774(vacuolar membrane);GO:0005794(Golgi apparatus);GO:0005829(cytosol);GO:0005886(plasma membrane);GO:0006351(transcription, DNA-templated);GO:0006355(regulation of transcription, DNA-templated);GO:0006457(protein folding);GO:0006986(response to unfolded protein);GO:0009266(response to temperature s…	03040(Spliceosome);04141(Protein processing in endoplasmic reticulum);04144(Endocytosis)	K03283	NA	PREDICTED: probable mediator of RNA polymerase II transcription subunit 37c [Fragaria vesca subsp. vesca]	NA	3161.48	5807.13	3721.02	149.033	183.31	114.919	1033.79	1564.59	790.399	2.50443e-26	1.10286e-24	yes
gene-GIB67_017576	GIB67_017576	33172	rna-gnl|WGS:JACGCM|KingUnif35988.1	GO:0003677(DNA binding);GO:0003700(DNA binding transcription factor activity);GO:0005515(protein binding);GO:0005634(nucleus);GO:0006351(transcription, DNA-templated);GO:0006355(regulation of transcription, DNA-templated);GO:0007623(circadian rhythm);GO:0009409(response to cold);GO:0009908(flower development);GO:0010114(response to red light);GO:0010154(fruit development);GO:0010187(negative regu…	NA	NA	NA	SPATULA/ALCATRAZ, partial [Bocconia frutescens]	NA	24.1745	10.0489	25.0328	0.272454	0.114836	0	2.1199	1.77706	1.04592	2.68145e-26	1.17829e-24	yes
gene-GIB67_000443	GIB67_000443	20320	rna-gnl|WGS:JACGCM|KingUnif40384.1	GO:0003333(amino acid transmembrane transport);GO:0005886(plasma membrane);GO:0015171(amino acid transmembrane transporter activity)	NA	NA	NA	hypothetical protein AQUCO_01100285v1 [Aquilegia coerulea]	NA	73.1306	74.9303	107.829	891.632	558.124	755.476	123.7	122.269	101.744	2.71228e-26	1.1893e-24	yes
gene-GIB67_001009	GIB67_001009	23417	rna-gnl|WGS:JACGCM|KingUnif36941.1	GO:0005215(transporter activity);GO:0005524(ATP binding);GO:0005886(plasma membrane);GO:0006810(transport);GO:0006979(response to oxidative stress);GO:0007623(circadian rhythm);GO:0009507(chloroplast);GO:0009644(response to high light intensity);GO:0009941(chloroplast envelope);GO:0010150(leaf senescence);GO:0016021(integral component of membrane);GO:0016301(kinase activity);GO:0016310(phosphoryl…	04626(Plant-pathogen interaction)	K13457	NA	UbiB domain [Macleaya cordata]	NA	47.1321	28.9462	70.9355	837.293	444.055	914.533	104.072	72.1733	94.5691	2.73912e-26	1.19851e-24	yes
gene-GIB67_028105	GIB67_028105	7632	rna-gnl|WGS:JACGCM|KingUnif00019.1	GO:0005506(iron ion binding);GO:0009507(chloroplast);GO:0009611(response to wounding);GO:0009694(jasmonic acid metabolic process);GO:0016021(integral component of membrane);GO:0016705(oxidoreductase activity, acting on paired donors, with incorporation or reduction of molecular oxygen);GO:0019825(oxygen binding);GO:0020037(heme binding);GO:0052694(jasmonoyl-isoleucine-12-hydroxylase activity);GO:…	00073(Cutin, suberine and wax biosynthesis)	K20769	EC:1.14.-.-	Cytochrome P450 [Macleaya cordata]	NA	0.084323	0.21314	0.373419	13.9739	13.0964	13.7005	2.16027	2.26654	1.26547	2.76822e-26	1.20867e-24	yes
gene-GIB67_017347	GIB67_017347	20350	rna-gnl|WGS:JACGCM|KingUnif23466.1	GO:0004674(protein serine/threonine kinase activity);GO:0005886(plasma membrane);GO:0006468(protein phosphorylation);GO:0006952(defense response);GO:0009506(plasmodesma)	NA	NA	NA	hypothetical protein AQUCO_02800273v1, partial [Aquilegia coerulea]	NA	1.30693	0.378302	1.28471	0.138677	0.419588	0.20494	9.03253	10.9781	9.43674	3.67095e-26	1.59943e-24	yes
gene-GIB67_041033	GIB67_041033	35615	rna-gnl|WGS:JACGCM|KingUnif36179.1	GO:0004674(protein serine/threonine kinase activity);GO:0005515(protein binding);GO:0005524(ATP binding);GO:0005634(nucleus);GO:0005886(plasma membrane);GO:0006468(protein phosphorylation);GO:0009506(plasmodesma);GO:0009755(hormone-mediated signaling pathway);GO:0010183(pollen tube guidance);GO:0016020(membrane);GO:0016021(integral component of membrane);GO:0016301(kinase activity);GO:0090406(pol…	NA	NA	NA	MDIS1-interacting receptor like kinase 2-like protein [Cinnamomum micranthum f. kanehirae]	NA	0.024917	0	0.020036	0.138463	0.238115	0.179057	3.36129	1.12796	6.8424	3.72747e-26	1.62062e-24	yes
gene-GIB67_022046	GIB67_022046	18708	rna-gnl|WGS:JACGCM|KingUnif28616.1	GO:0003677(DNA binding);GO:0003700(DNA binding transcription factor activity);GO:0005634(nucleus);GO:0005643(nuclear pore);GO:0006351(transcription, DNA-templated);GO:0006355(regulation of transcription, DNA-templated);GO:0006952(defense response);GO:0009873(ethylene-activated signaling pathway);GO:0010087(phloem or xylem histogenesis);GO:0010200(response to chitin);GO:0045893(positive regulation…	04626(Plant-pathogen interaction)	K13433	NA	pathogenesis-related genes transcriptional activator PTI5-like [Manihot esculenta]	NA	0.399465	0.8014	2.05621	29.1233	33.0577	30.8394	0.818673	0.945088	1.67681	3.90002e-26	1.69206e-24	yes
gene-GIB67_028106	GIB67_028106	7631	rna-gnl|WGS:JACGCM|KingUnif43001.1	GO:0005506(iron ion binding);GO:0009507(chloroplast);GO:0009611(response to wounding);GO:0009694(jasmonic acid metabolic process);GO:0016021(integral component of membrane);GO:0016705(oxidoreductase activity, acting on paired donors, with incorporation or reduction of molecular oxygen);GO:0019825(oxygen binding);GO:0020037(heme binding);GO:0052694(jasmonoyl-isoleucine-12-hydroxylase activity);GO:…	00073(Cutin, suberine and wax biosynthesis)	K20769	EC:1.14.-.-	PREDICTED: cytochrome P450 94A1-like [Nicotiana tomentosiformis]	NA	0	0.248098	0.400411	37.1371	24.2275	32.5943	4.39345	8.16907	7.07072	4.039e-26	1.74868e-24	yes
gene-GIB67_025148	GIB67_025148	13991	rna-gnl|WGS:JACGCM|KingUnif25172.1	GO:0009416(response to light stimulus);GO:0009535(chloroplast thylakoid membrane);GO:0009768(photosynthesis, light harvesting in photosystem I);GO:0009941(chloroplast envelope);GO:0010287(plastoglobule);GO:0016168(chlorophyll binding);GO:0031409(pigment binding)	00196(Photosynthesis - antenna proteins)	K08914	NA	Chlorophyll A-B binding protein [Macleaya cordata]	NA	568.034	588.751	571.34	35.3708	156.919	56.0892	26.8329	22.1603	26.4604	4.08498e-26	1.76486e-24	yes
gene-GIB67_026900	GIB67_026900	26262	rna-gnl|WGS:JACGCM|KingUnif08888.1	GO:0005887(integral component of plasma membrane)	NA	NA	NA	PREDICTED: inorganic phosphate transporter 1-4-like [Nelumbo nucifera]	NA	9.91123	3.79941	10.7513	1728.26	402.801	1214.31	343.125	125.012	120.876	4.6817e-26	2.01843e-24	yes
gene-GIB67_030858	GIB67_030858	40098	rna-gnl|WGS:JACGCM|KingUnif34463.1	GO:0005315(inorganic phosphate transmembrane transporter activity);GO:0005887(integral component of plasma membrane);GO:0035435(phosphate ion transmembrane transport)	NA	NA	NA	Phosphate transporter [Macleaya cordata]	NA	6.87485	4.13041	6.09294	31.3033	42.0214	38.7078	8.29876	5.98885	8.29376	4.99523e-26	2.1491e-24	yes
gene-GIB67_010130	GIB67_010130	12896	rna-gnl|WGS:JACGCM|KingUnif19189.1	GO:0003677(DNA binding);GO:0005634(nucleus);GO:0006355(regulation of transcription, DNA-templated);GO:0046872(metal ion binding)	NA	NA	NA	zinc finger protein [Macleaya cordata]	NA	1.13832	1.08604	0.473051	18.2629	15.3476	31.0826	1.62477	2.54796	1.83483	5.11557e-26	2.19628e-24	yes
gene-GIB67_019623	GIB67_019623	16627	rna-gnl|WGS:JACGCM|KingUnif05356.1	GO:0003735(structural constituent of ribosome);GO:0006412(translation)	NA	NA	NA	mitochondrial uncoupling protein 5 [Ricinus communis]	NA	3.62303	2.35199	6.99357	192.717	123.152	159.522	19.9782	42.3094	9.82681	5.48368e-26	2.34942e-24	yes
gene-GIB67_018423	GIB67_018423	34425	rna-gnl|WGS:JACGCM|KingUnif11724.1	GO:0019745(pentacyclic triterpenoid biosynthetic process);GO:0042299(lupeol synthase activity)	00909(Sesquiterpenoid and triterpenoid biosynthesis)	K20659	EC:5.4.99.41	beta-amyrin synthase [Nigella sativa]	NA	0	0	0	0	0	0	14.7249	6.23391	17.9052	5.84261e-26	2.49799e-24	yes
gene-GIB67_025208	GIB67_025208	14049	rna-gnl|WGS:JACGCM|KingUnif03872.1	GO:0004674(protein serine/threonine kinase activity);GO:0005886(plasma membrane);GO:0006468(protein phosphorylation);GO:0006952(defense response);GO:0009506(plasmodesma)	NA	NA	NA	PREDICTED: G-type lectin S-receptor-like serine/threonine-protein kinase At4g27290 [Gossypium hirsutum]	NA	1.93904	0.793713	2.75831	28.2658	29.1588	31.2806	8.06525	9.25252	8.41563	6.49288e-26	2.77025e-24	yes
gene-GIB67_035496	GIB67_035496	4329	rna-gnl|WGS:JACGCM|KingUnif32835.1	GO:0003674(molecular_function);GO:0005634(nucleus);GO:0005829(cytosol);GO:0019005(SCF ubiquitin ligase complex);GO:0030162(regulation of proteolysis);GO:0031625(ubiquitin protein ligase binding);GO:0043161(proteasome-mediated ubiquitin-dependent protein catabolic process);GO:0080037(negative regulation of cytokinin-activated signaling pathway);GO:2000762(regulation of phenylpropanoid metabolic pr…	NA	NA	NA	PREDICTED: F-box/kelch-repeat protein At1g15670-like [Nelumbo nucifera]	NA	1.54771	2.43719	4.16784	28.2926	46.9563	9.59331	147.43	158.692	91.5234	7.08564e-26	3.0169e-24	yes
gene-GIB67_027769	GIB67_027769	221	rna-gnl|WGS:JACGCM|KingUnif19895.1	GO:0004197(cysteine-type endopeptidase activity);GO:0005615(extracellular space);GO:0005764(lysosome);GO:0051603(proteolysis involved in cellular protein catabolic process)	NA	NA	NA	Peptidase C1A [Macleaya cordata]	NA	2.59992	1.80923	2.08584	366.812	31.9652	63.2895	3.94985	2.18126	4.68353	7.15159e-26	3.03869e-24	yes
gene-GIB67_029617	GIB67_029617	33657	rna-gnl|WGS:JACGCM|KingUnif35412.1	GO:0005737(cytoplasm);GO:0005829(cytosol);GO:0008270(zinc ion binding);GO:0009809(lignin biosynthetic process);GO:0045551(cinnamyl-alcohol dehydrogenase activity);GO:0052747(sinapyl alcohol dehydrogenase activity);GO:0055114(oxidation-reduction process)	00940(Phenylpropanoid biosynthesis)	K00083	EC:1.1.1.195	PREDICTED: probable cinnamyl alcohol dehydrogenase 1 [Vigna angularis]	NA	0.076553	0	0	5.69018	7.34494	4.38144	14.2629	6.66843	9.04464	7.85889e-26	3.33233e-24	yes
gene-GIB67_031415	GIB67_031415	25092	rna-gnl|WGS:JACGCM|KingUnif15851.1	GO:0005515(protein binding);GO:0005524(ATP binding);GO:0005739(mitochondrion);GO:0005794(Golgi apparatus);GO:0005829(cytosol);GO:0005886(plasma membrane);GO:0006457(protein folding);GO:0007005(mitochondrion organization);GO:0008219(cell death);GO:0009409(response to cold);GO:0009507(chloroplast);GO:0009570(chloroplast stroma);GO:0009627(systemic acquired resistance);GO:0009941(chloroplast envelop…	03018(RNA degradation)	K04077	NA	Chaperonin Cpn60 [Macleaya cordata]	NA	3.64715	7.22044	3.66707	0	0	0	0.114486	0	0	7.97417e-26	3.37426e-24	yes
gene-GIB67_009472	GIB67_009472	15796	rna-gnl|WGS:JACGCM|KingUnif23036.1	GO:0005634(nucleus);GO:0005737(cytoplasm)	NA	NA	NA	Armadillo [Macleaya cordata]	NA	4.78034	2.71537	3.35865	30.8678	33.9253	31.6676	5.01199	8.67533	6.1483	8.14257e-26	3.43844e-24	yes
gene-GIB67_021121	GIB67_021121	14267	rna-gnl|WGS:JACGCM|KingUnif39577.1	GO:0003729(mRNA binding);GO:0003735(structural constituent of ribosome);GO:0006412(translation);GO:0022625(cytosolic large ribosomal subunit)	03010(Ribosome)	K02872	NA	hypothetical protein AQUCO_03400131v1 [Aquilegia coerulea]	NA	194.737	592.022	111.501	19.8532	15.5882	14.5457	19.8625	25.3794	22.2593	8.35606e-26	3.52136e-24	yes
gene-GIB67_004466	GIB67_004466	19841	rna-gnl|WGS:JACGCM|KingUnif06308.1	GO:0016020(membrane);GO:0016709(oxidoreductase activity, acting on paired donors, with incorporation or reduction of molecular oxygen, NAD(P)H as one donor, and incorporation of one atom of oxygen);GO:0044550(secondary metabolite biosynthetic process)	00590(Arachidonic acid metabolism);00591(Linoleic acid metabolism)	K07418	EC:1.14.14.1;EC:1.14.14.73	putative cytochrome P450 monooxygenase [Actaea racemosa]	NA	1.89578	1.07878	3.52236	38.8684	35.4785	34.0588	6.39133	2.71951	3.35418	9.60086e-26	4.03766e-24	yes
gene-GIB67_029906	GIB67_029906	2622	rna-gnl|WGS:JACGCM|KingUnif32665.1	GO:0004674(protein serine/threonine kinase activity);GO:0005524(ATP binding);GO:0005576(extracellular region);GO:0006468(protein phosphorylation);GO:0016021(integral component of membrane);GO:0016301(kinase activity);GO:0030247(polysaccharide binding)	NA	NA	NA	hypothetical protein AQUCO_04100057v1 [Aquilegia coerulea]	NA	0.439022	0.504624	1.17388	12.4984	13.556	12.9307	3.84176	3.50637	3.75731	9.7351e-26	4.08576e-24	yes
gene-GIB67_022870	GIB67_022870	2082	rna-gnl|WGS:JACGCM|KingUnif05858.1	GO:0005509(calcium ion binding);GO:0005544(calcium-dependent phospholipid binding);GO:0005886(plasma membrane)	00270(Cysteine and methionine metabolism);00450(Selenocompound metabolism)	K00549	EC:2.1.1.14	C2 calcium-dependent membrane targeting [Macleaya cordata]	NA	19.0941	17.9964	21.6479	85.528	114.028	131.729	19.1859	24.497	22.5431	9.7894e-26	4.10018e-24	yes
gene-GIB67_038145	GIB67_038145	28384	rna-gnl|WGS:JACGCM|KingUnif05187.1	GO:0000139(Golgi membrane);GO:0005525(GTP binding);GO:0005634(nucleus);GO:0005737(cytoplasm);GO:0005774(vacuolar membrane);GO:0005783(endoplasmic reticulum);GO:0005789(endoplasmic reticulum membrane);GO:0005886(plasma membrane);GO:0006888(ER to Golgi vesicle-mediated transport);GO:0009832(plant-type cell wall biogenesis);GO:0009932(cell tip growth);GO:0010053(root epidermal cell differentiation);…	NA	NA	NA	hypothetical protein AQUCO_01500372v1 [Aquilegia coerulea]	NA	9.04816	10.0906	9.0368	49.8209	53.5209	60.1304	14.9574	14.054	18.5896	9.83288e-26	4.11002e-24	yes
gene-GIB67_021009	GIB67_021009	14155	rna-gnl|WGS:JACGCM|KingUnif01095.1	GO:0009718(anthocyanin-containing compound biosynthetic process);GO:0033303(quercetin O-glucoside biosynthetic process);GO:0033330(kaempferol O-glucoside biosynthetic process);GO:0033485(cyanidin 3-O-glucoside biosynthetic process);GO:0047213(anthocyanidin 3-O-glucosyltransferase activity)	00942(Anthocyanin biosynthesis)	K12930	EC:2.4.1.115	anthocyanidin 3-O-glucosyltransferase [Paeonia delavayi]	NA	0.888275	1.13853	1.01943	6.68883	6.87517	20.1503	0.27925	0.311506	0.402107	1.02248e-25	4.26519e-24	yes
gene-GIB67_012945	GIB67_012945	11494	rna-gnl|WGS:JACGCM|KingUnif21134.1	GO:0004564(beta-fructofuranosidase activity);GO:0004575(sucrose alpha-glucosidase activity);GO:0005982(starch metabolic process);GO:0005987(sucrose catabolic process);GO:0009507(chloroplast);GO:0033926(glycopeptide alpha-N-acetylgalactosaminidase activity);GO:0048825(cotyledon development)	03010(Ribosome)	K02986	NA	hypothetical protein AQUCO_00400040v1 [Aquilegia coerulea]	NA	20.0745	17.0699	27.5437	176.919	94.8823	187.416	23.3263	25.3906	22.5264	1.07606e-25	4.47957e-24	yes
gene-GIB67_004031	GIB67_004031	7439	rna-gnl|WGS:JACGCM|KingUnif25354.1	GO:0016020(membrane);GO:0016709(oxidoreductase activity, acting on paired donors, with incorporation or reduction of molecular oxygen, NAD(P)H as one donor, and incorporation of one atom of oxygen);GO:0044550(secondary metabolite biosynthetic process)	NA	NA	NA	Cytochrome P450 [Macleaya cordata]	NA	4.97623	4.32897	6.60046	33.7926	48.0626	40.0453	13.6964	16.5025	14.4765	1.09216e-25	4.53382e-24	yes
gene-GIB67_040656	GIB67_040656	43195	rna-gnl|WGS:JACGCM|KingUnif38931.1	GO:0000139(Golgi membrane);GO:0000325(plant-type vacuole);GO:0004553(hydrolase activity, hydrolyzing O-glycosyl compounds);GO:0004564(beta-fructofuranosidase activity);GO:0004575(sucrose alpha-glucosidase activity);GO:0005773(vacuole);GO:0005774(vacuolar membrane);GO:0005775(vacuolar lumen);GO:0005789(endoplasmic reticulum membrane);GO:0005985(sucrose metabolic process);GO:0009505(plant-type cell…	00052(Galactose metabolism);00500(Starch and sucrose metabolism)	K01193	EC:3.2.1.26	Glycoside hydrolase [Macleaya cordata]	NA	1.23637	0.294895	1.14401	27.3686	7.52053	30.4773	0.682342	0.91249	0.486821	1.0935e-25	4.53382e-24	yes
gene-GIB67_037341	GIB67_037341	39764	rna-gnl|WGS:JACGCM|KingUnif39375.1	GO:0005634(nucleus);GO:0005737(cytoplasm)	NA	NA	NA	Armadillo [Macleaya cordata]	NA	1.47504	0.80419	2.40894	34.0681	17.3771	34.8032	5.24465	6.01192	5.41609	1.16339e-25	4.81391e-24	yes
gene-GIB67_032721	GIB67_032721	18044	rna-gnl|WGS:JACGCM|KingUnif07709.1	NA	NA	NA	NA		NA	0	0.090732	0	10.7058	7.45847	9.75683	16.8057	10.8275	17.3681	1.25387e-25	5.17789e-24	yes
gene-GIB67_029733	GIB67_029733	33768	rna-gnl|WGS:JACGCM|KingUnif24285.1	NA	NA	NA	NA		NA	0	0.156058	0.090771	7.29394	10.1689	9.90794	0.482267	0.318529	0.498913	1.37655e-25	5.67309e-24	yes
gene-GIB67_021445	GIB67_021445	7746	rna-gnl|WGS:JACGCM|KingUnif29658.1	GO:0034219(carbohydrate transmembrane transport)	NA	NA	NA	Drug/metabolite transporter [Macleaya cordata]	NA	1.5237	0.471739	1.75755	19.6034	31.8959	20.4016	1.26494	1.88865	2.11309	1.49016e-25	6.12904e-24	yes
gene-GIB67_029338	GIB67_029338	13801	rna-gnl|WGS:JACGCM|KingUnif21806.1	GO:0000977(RNA polymerase II regulatory region sequence-specific DNA binding);GO:0003677(DNA binding);GO:0003700(DNA binding transcription factor activity);GO:0005515(protein binding);GO:0005634(nucleus);GO:0006351(transcription, DNA-templated);GO:0006355(regulation of transcription, DNA-templated);GO:0009585(red, far-red light phototransduction);GO:0010224(response to UV-B);GO:0080167(response t…	04712(Circadian rhythm - plant)	K16241	NA	Basic-leucine zipper domain [Macleaya cordata]	NA	7.54237	2.52467	9.68192	164.449	117.887	117.816	4.36846	3.51232	12.4494	1.52009e-25	6.23966e-24	yes
gene-GIB67_002666	GIB67_002666	34334	rna-gnl|WGS:JACGCM|KingUnif16480.1	GO:0004674(protein serine/threonine kinase activity);GO:0005634(nucleus);GO:0005737(cytoplasm);GO:0005886(plasma membrane);GO:0035556(intracellular signal transduction)	04016(MAPK signaling pathway - plant)	K20714	EC:2.7.11.1	Protein kinase domain [Macleaya cordata]	NA	0.042202	0	0.061763	10.8196	4.37743	8.79424	0.61376	1.5084	0.995956	1.5998e-25	6.55375e-24	yes
gene-GIB67_029307	GIB67_029307	13768	rna-gnl|WGS:JACGCM|KingUnif00835.1	GO:0004252(serine-type endopeptidase activity);GO:0005886(plasma membrane);GO:0006508(proteolysis);GO:0016021(integral component of membrane);GO:0031966(mitochondrial membrane);GO:0046872(metal ion binding)	NA	NA	NA	PREDICTED: rhomboid-like protein 14, mitochondrial [Nelumbo nucifera]	NA	51.1604	73.8206	43.0397	11.733	10.6029	11.2877	7.83505	11.7359	8.66069	1.82329e-25	7.45445e-24	yes
gene-GIB67_014908	GIB67_014908	19030	rna-gnl|WGS:JACGCM|KingUnif29096.1	GO:0005658(alpha DNA polymerase:primase complex);GO:0006270(DNA replication initiation);GO:0046982(protein heterodimerization activity)	00230(Purine metabolism);00240(Pyrimidine metabolism);03030(DNA replication)	K02321	NA	hypothetical protein AQUCO_01100282v1 [Aquilegia coerulea]	NA	6.82872	8.08129	4.59249	0	0	0.022964	3.66884	1.19363	5.12309	1.95535e-25	7.97852e-24	yes
gene-GIB67_041863	GIB67_041863	39244	rna-gnl|WGS:JACGCM|KingUnif13425.1	GO:0003714(transcription corepressor activity);GO:0005634(nucleus);GO:0009611(response to wounding);GO:0031347(regulation of defense response);GO:1903507(negative regulation of nucleic acid-templated transcription);GO:2000022(regulation of jasmonic acid mediated signaling pathway)	04075(Plant hormone signal transduction)	K13464	NA	protein TIFY 9 [Populus trichocarpa]	NA	21.561	20.1691	38.0921	311.508	311.074	506.383	70.4578	71.2694	28.4194	2.00192e-25	8.15237e-24	yes
gene-GIB67_003554	GIB67_003554	23814	rna-gnl|WGS:JACGCM|KingUnif31264.1	GO:0004866(endopeptidase inhibitor activity);GO:0005576(extracellular region);GO:0005618(cell wall);GO:0048046(apoplast)	NA	NA	NA	Proteinase inhibitor I3 [Macleaya cordata]	NA	4.71308	1.49324	4.72343	4.50266	5.96003	4.37914	170.494	75.1357	34.4626	2.41465e-25	9.81369e-24	yes
gene-GIB67_040227	GIB67_040227	18590	rna-gnl|WGS:JACGCM|KingUnif24203.1	GO:0016165(linoleate 13S-lipoxygenase activity)	00591(Linoleic acid metabolism);00592(alpha-Linolenic acid metabolism)	K00454	EC:1.13.11.12	PREDICTED: linoleate 13S-lipoxygenase 2-1, chloroplastic [Nelumbo nucifera]	NA	924.456	876.973	1746.64	36.0067	36.9461	61.3768	684.885	830.141	558.795	2.48359e-25	1.0074e-23	yes
gene-GIB67_040181	GIB67_040181	18556	rna-gnl|WGS:JACGCM|KingUnif23560.1	GO:0016020(membrane);GO:0016709(oxidoreductase activity, acting on paired donors, with incorporation or reduction of molecular oxygen, NAD(P)H as one donor, and incorporation of one atom of oxygen);GO:0044550(secondary metabolite biosynthetic process)	NA	NA	NA	PREDICTED: cytochrome P450 93A3-like [Juglans regia]	NA	4.11315	2.18601	8.69449	421.453	331.804	556.684	82.4479	66.0052	14.9518	2.90278e-25	1.17511e-23	yes
gene-GIB67_008798	GIB67_008798	22787	rna-gnl|WGS:JACGCM|KingUnif39312.1	GO:0003674(molecular_function);GO:0005634(nucleus);GO:0005737(cytoplasm);GO:0008150(biological_process)	NA	NA	NA	hypothetical protein PanWU01x14_078200 [Parasponia andersonii]	NA	639.118	949.563	638.49	73.4744	68.6969	67.7537	182.926	242.143	127.101	3.369e-25	1.36117e-23	yes
gene-GIB67_034630	GIB67_034630	2338	rna-gnl|WGS:JACGCM|KingUnif29270.1	GO:0003735(structural constituent of ribosome);GO:0006412(translation)	NA	NA	NA	mitochondrial uncoupling protein 5 [Ricinus communis]	NA	4.18961	2.53916	7.6921	209.648	134.805	179.94	21.1088	47.2164	10.5049	3.40809e-25	1.37426e-23	yes
gene-GIB67_036803	GIB67_036803	30194	rna-gnl|WGS:JACGCM|KingUnif08539.1	GO:0008150(biological_process)	NA	NA	NA	uncharacterized protein LOC113730381 [Coffea arabica]	NA	7.56335	8.07413	7.92343	64.8258	107.571	63.3474	5.18036	13.6914	4.14525	3.65267e-25	1.47e-23	yes
gene-GIB67_008284	GIB67_008284	14898	rna-gnl|WGS:JACGCM|KingUnif25810.1	GO:0004364(glutathione transferase activity);GO:0005737(cytoplasm);GO:0006749(glutathione metabolic process);GO:0009407(toxin catabolic process)	00480(Glutathione metabolism)	K00799	EC:2.5.1.18	Glutathione S-transferase [Macleaya cordata]	NA	19.65	30.2599	29.3794	218.044	230.95	276.705	72.4965	102.432	58.4464	3.88724e-25	1.56135e-23	yes
gene-GIB67_001374	GIB67_001374	14097	rna-gnl|WGS:JACGCM|KingUnif09275.1	GO:0000103(sulfate assimilation);GO:0005829(cytosol);GO:0005886(plasma membrane);GO:0006457(protein folding);GO:0015035(protein disulfide oxidoreductase activity);GO:0016671(oxidoreductase activity, acting on a sulfur group of donors, disulfide as acceptor);GO:0034599(cellular response to oxidative stress);GO:0045454(cell redox homeostasis);GO:0055114(oxidation-reduction process)	NA	NA	NA	thioredoxin H-type-like [Manihot esculenta]	NA	46.7972	35.4532	37.6396	1.31431	0.685929	0.281031	45.3078	19.4687	69.0142	4.83044e-25	1.93641e-23	yes
gene-GIB67_040282	GIB67_040282	18650	rna-gnl|WGS:JACGCM|KingUnif30780.1	GO:0004674(protein serine/threonine kinase activity);GO:0005737(cytoplasm);GO:0006468(protein phosphorylation);GO:0030100(regulation of endocytosis)	NA	NA	NA	Protein kinase domain [Macleaya cordata]	NA	10.3165	12.9775	11.1678	58.2645	59.3947	58.9877	16.1695	17.2914	16.3417	4.90598e-25	1.96287e-23	yes
gene-GIB67_031636	GIB67_031636	29583	rna-gnl|WGS:JACGCM|KingUnif22204.1	GO:0004722(protein serine/threonine phosphatase activity);GO:0005515(protein binding);GO:0005634(nucleus);GO:0005737(cytoplasm);GO:0005829(cytosol);GO:0006470(protein dephosphorylation);GO:0046872(metal ion binding);GO:0050688(regulation of defense response to virus)	NA	NA	NA	hypothetical protein AQUCO_01600092v1 [Aquilegia coerulea]	NA	6.38699	4.64147	2.42179	65.0795	47.5404	32.3638	4.87444	4.37912	7.51995	5.0294e-25	2.00834e-23	yes
gene-GIB67_038562	GIB67_038562	8216	rna-gnl|WGS:JACGCM|KingUnif26999.1	GO:0003674(molecular_function);GO:0005739(mitochondrion);GO:0008150(biological_process);GO:0016020(membrane)	00564(Glycerophospholipid metabolism);00565(Ether lipid metabolism);00440(Phosphonate and phosphinate metabolism)	K00993	EC:2.7.8.1	Protein of unknown function DUF1262 [Macleaya cordata]	NA	0.050544	0.043422	0.115718	60.9955	4.92493	28.0349	1.03198	0.157023	0.162872	5.19406e-25	2.07008e-23	yes
gene-GIB67_038002	GIB67_038002	35292	rna-gnl|WGS:JACGCM|KingUnif28208.1	GO:0004843(thiol-dependent ubiquitin-specific protease activity);GO:0005515(protein binding);GO:0005634(nucleus);GO:0005737(cytoplasm);GO:0005829(cytosol);GO:0006511(ubiquitin-dependent protein catabolic process);GO:0009506(plasmodesma);GO:0009867(jasmonic acid mediated signaling pathway);GO:0016579(protein deubiquitination);GO:0036459(thiol-dependent ubiquitinyl hydrolase activity)	NA	NA	NA	uncharacterized protein LOC110940971 isoform X3 [Helianthus annuus]	NA	7.92268	11.7167	11.3688	86.6303	97.2009	102.736	94.713	65.343	57.8645	5.40987e-25	2.15192e-23	yes
gene-GIB67_004407	GIB67_004407	19796	rna-gnl|WGS:JACGCM|KingUnif31198.1	NA	NA	NA	NA	PREDICTED: uncharacterized protein LOC100852504 [Vitis vinifera]	NA	0.669704	0.366927	1.0726	18.9665	33.8693	17.993	9.03306	5.16047	9.19161	5.96757e-25	2.36917e-23	yes
gene-GIB67_026636	GIB67_026636	10331	rna-gnl|WGS:JACGCM|KingUnif37210.1	GO:0004672(protein kinase activity);GO:0005515(protein binding);GO:0005524(ATP binding);GO:0005634(nucleus);GO:0005834(heterotrimeric G-protein complex);GO:0006468(protein phosphorylation);GO:0009585(red, far-red light phototransduction);GO:0009637(response to blue light);GO:0042802(identical protein binding);GO:0080008(Cul4-RING E3 ubiquitin ligase complex)	04120(Ubiquitin mediated proteolysis);04712(Circadian rhythm - plant)	K10143	EC:2.3.2.27	PREDICTED: protein SPA1-RELATED 3-like isoform X2 [Nelumbo nucifera]	NA	5.6786	3.49466	3.88954	29.5103	43.0264	47.0486	6.83845	7.71149	12.6265	6.92103e-25	2.74241e-23	yes
gene-GIB67_013051	GIB67_013051	24619	rna-gnl|WGS:JACGCM|KingUnif06863.1	GO:0016020(membrane);GO:0016709(oxidoreductase activity, acting on paired donors, with incorporation or reduction of molecular oxygen, NAD(P)H as one donor, and incorporation of one atom of oxygen);GO:0044550(secondary metabolite biosynthetic process)	NA	NA	NA	hypothetical protein AQUCO_01300638v1 [Aquilegia coerulea]	NA	6.76678	2.63255	4.16753	33.5313	57.6248	42.0257	7.65709	8.5845	8.96236	8.46315e-25	3.34701e-23	yes
gene-GIB67_029762	GIB67_029762	9939	rna-gnl|WGS:JACGCM|KingUnif01098.1	GO:0005886(plasma membrane);GO:0016301(kinase activity);GO:0016310(phosphorylation)	NA	NA	NA	PREDICTED: probable receptor-like serine/threonine-protein kinase At5g57670 [Nelumbo nucifera]	NA	4.66937	2.81334	4.4267	30.5425	24.5816	33.3927	9.13067	9.69039	10.4736	9.06342e-25	3.57753e-23	yes
gene-GIB67_006105	GIB67_006105	32536	rna-gnl|WGS:JACGCM|KingUnif35816.1	GO:0016020(membrane);GO:0016709(oxidoreductase activity, acting on paired donors, with incorporation or reduction of molecular oxygen, NAD(P)H as one donor, and incorporation of one atom of oxygen);GO:0044550(secondary metabolite biosynthetic process)	NA	NA	NA	hypothetical protein AQUCO_00201291v1 [Aquilegia coerulea]	NA	0.775056	1.30175	1.53514	14.003	25.3336	26.4414	2.15801	0.551166	1.26479	9.38439e-25	3.69713e-23	yes
gene-GIB67_008639	GIB67_008639	27254	rna-gnl|WGS:JACGCM|KingUnif37862.1	GO:0044255(cellular lipid metabolic process);GO:0052689(carboxylic ester hydrolase activity)	00040(Pentose and glucuronate interconversions);00051(Fructose and mannose metabolism)	K01805	EC:5.3.1.5	protein of unknown function DUF676 [Macleaya cordata]	NA	3.98314	4.75385	5.02041	31.5413	33.4497	33.6375	9.18004	7.43592	7.02092	1.00323e-24	3.9448e-23	yes
gene-GIB67_040519	GIB67_040519	39394	rna-gnl|WGS:JACGCM|KingUnif17337.1	GO:0003824(catalytic activity);GO:0005515(protein binding);GO:0005768(endosome);GO:0005794(Golgi apparatus);GO:0005802(trans-Golgi network);GO:0006486(protein glycosylation);GO:0009826(unidimensional cell growth);GO:0009863(salicylic acid mediated signaling pathway);GO:0009969(xyloglucan biosynthetic process);GO:0010256(endomembrane system organization);GO:0016020(membrane);GO:0016757(transferase…	NA	NA	NA	Exostosin-like [Macleaya cordata]	NA	1.59408	1.17664	2.81747	27.2764	20.8133	27.8805	9.46883	11.9955	10.3861	1.02734e-24	4.03191e-23	yes
gene-GIB67_026546	GIB67_026546	360	rna-gnl|WGS:JACGCM|KingUnif08212.1	GO:0003714(transcription corepressor activity);GO:0005634(nucleus);GO:0009611(response to wounding);GO:0031347(regulation of defense response);GO:1903507(negative regulation of nucleic acid-templated transcription);GO:2000022(regulation of jasmonic acid mediated signaling pathway)	04075(Plant hormone signal transduction)	K13464	NA	hypothetical protein AQUCO_07600047v1 [Aquilegia coerulea]	NA	26.4072	42.8491	72.6667	479.233	554.799	1168.96	55.7024	93.6537	44.4293	1.05542e-24	4.13424e-23	yes
gene-GIB67_001375	GIB67_001375	14095	rna-gnl|WGS:JACGCM|KingUnif39181.1	GO:0004197(cysteine-type endopeptidase activity);GO:0005615(extracellular space);GO:0005764(lysosome);GO:0051603(proteolysis involved in cellular protein catabolic process)	NA	NA	NA	hypothetical protein AQUCO_00700322v1 [Aquilegia coerulea]	NA	18.4899	8.87875	23.6377	190.061	143.003	178.017	30.8225	28.5631	14.7734	1.15625e-24	4.52059e-23	yes
gene-GIB67_033852	GIB67_033852	34804	rna-gnl|WGS:JACGCM|KingUnif04593.1	NA	NA	NA	NA		NA	101.231	38.8638	23.7821	2.05777	2.74775	1.78706	4.53033	2.23476	6.34503	1.16541e-24	4.54777e-23	yes
gene-GIB67_040387	GIB67_040387	42064	rna-gnl|WGS:JACGCM|KingUnif40896.1	GO:0002238(response to molecule of fungal origin);GO:0050474((S)-norcoclaurine synthase activity);GO:1901010((S)-reticuline metabolic process)	NA	NA	NA	PREDICTED: S-norcoclaurine synthase 2-like [Nelumbo nucifera]	NA	18.8566	7.98598	26.0267	1.40704	1.47919	3.78309	52.5155	66.4166	71.2519	1.16947e-24	4.55496e-23	yes
gene-GIB67_014556	GIB67_014556	36867	rna-gnl|WGS:JACGCM|KingUnif26161.1	GO:0003674(molecular_function);GO:0005615(extracellular space);GO:0005618(cell wall);GO:0005794(Golgi apparatus);GO:0005829(cytosol);GO:0008150(biological_process);GO:0009505(plant-type cell wall);GO:0009506(plasmodesma);GO:0009507(chloroplast);GO:0048046(apoplast)	03013(RNA transport)	K14299	NA	Phosphate-induced protein 1 [Macleaya cordata]	NA	12.3427	2.6598	12.2381	108.697	142.098	161.741	15.6328	14.6735	13.2364	1.17751e-24	4.57758e-23	yes
gene-GIB67_037807	GIB67_037807	30755	rna-gnl|WGS:JACGCM|KingUnif29102.1	GO:0003674(molecular_function);GO:0005886(plasma membrane);GO:0009506(plasmodesma);GO:0016021(integral component of membrane);GO:0042742(defense response to bacterium)	NA	NA	NA	Late embryogenesis abundant protein [Macleaya cordata]	NA	3.71208	2.39248	4.03878	45.0983	62.3712	59.9873	16.974	6.88345	6.91578	1.25979e-24	4.88821e-23	yes
gene-GIB67_039179	GIB67_039179	21247	rna-gnl|WGS:JACGCM|KingUnif43160.1	GO:0016021(integral component of membrane)	NA	NA	NA	General substrate transporter [Macleaya cordata]	NA	0	0	0	0	0	0	5.0347	1.06552	21.2211	1.34609e-24	5.21325e-23	yes
gene-GIB67_011139	GIB67_011139	850	rna-gnl|WGS:JACGCM|KingUnif34743.1	GO:0010304(PSII associated light-harvesting complex II catabolic process);GO:0015996(chlorophyll catabolic process);GO:0034256(chlorophyll(ide) b reductase activity)	00860(Porphyrin and chlorophyll metabolism)	K13606	EC:1.1.1.294	Short-chain dehydrogenase/reductase SDR [Macleaya cordata]	NA	28.4809	15.6066	38.0844	374.586	189.712	392.476	48.4443	38.7666	29.2667	1.38012e-24	5.33501e-23	yes
gene-GIB67_017126	GIB67_017126	2635	rna-gnl|WGS:JACGCM|KingUnif42910.1	GO:0005886(plasma membrane);GO:0016021(integral component of membrane);GO:0042626(ATPase activity, coupled to transmembrane movement of substances)	NA	NA	NA	hypothetical protein AQUCO_02100092v1 [Aquilegia coerulea]	NA	7.00682	10.6961	6.20218	0	0	0	4.73505	2.01023	3.16659	1.38344e-24	5.33779e-23	yes
gene-GIB67_007755	GIB67_007755	16157	rna-gnl|WGS:JACGCM|KingUnif38310.1	GO:0004674(protein serine/threonine kinase activity);GO:0005886(plasma membrane);GO:0006468(protein phosphorylation)	NA	NA	NA	PREDICTED: putative receptor protein kinase ZmPK1 [Vitis vinifera]	NA	0.697825	0.663698	0.958734	12.0847	9.92495	18.3149	6.71261	4.82675	3.4932	1.67954e-24	6.4681e-23	yes
gene-GIB67_029192	GIB67_029192	31776	rna-gnl|WGS:JACGCM|KingUnif26633.1	GO:0005739(mitochondrion);GO:0005774(vacuolar membrane);GO:0008150(biological_process);GO:0009507(chloroplast);GO:0046872(metal ion binding)	NA	NA	NA	Coiled-coil domain-containing protein 90 [Macleaya cordata]	NA	3.14412	2.05483	2.2111	42.5464	19.277	29.2007	5.67996	3.44845	3.96432	1.73631e-24	6.67425e-23	yes
gene-GIB67_036018	GIB67_036018	16432	rna-gnl|WGS:JACGCM|KingUnif28851.1	GO:0005886(plasma membrane);GO:0006857(oligopeptide transport);GO:0016021(integral component of membrane);GO:0022857(transmembrane transporter activity);GO:0055085(transmembrane transport)	NA	NA	NA	PREDICTED: probable metal-nicotianamine transporter YSL7 isoform X1 [Daucus carota subsp. sativus]	NA	9.2917	9.66983	11.6724	79.9521	57.1193	68.6146	23.8235	15.7918	14.1126	1.8423e-24	7.06844e-23	yes
gene-GIB67_035744	GIB67_035744	22075	rna-gnl|WGS:JACGCM|KingUnif41780.1	GO:0005634(nucleus);GO:0016301(kinase activity);GO:0016310(phosphorylation)	NA	NA	NA	PREDICTED: uncharacterized protein LOC105122894 isoform X2 [Populus euphratica]	NA	6.49562	7.17436	4.91363	51.7862	28.9343	35.22	3.64359	5.61189	3.74649	2.04908e-24	7.84719e-23	yes
gene-GIB67_005445	GIB67_005445	10563	rna-gnl|WGS:JACGCM|KingUnif28513.1	GO:0005737(cytoplasm);GO:0006511(ubiquitin-dependent protein catabolic process);GO:0031625(ubiquitin protein ligase binding);GO:0061630(ubiquitin protein ligase activity)	04120(Ubiquitin mediated proteolysis)	K10576	EC:2.3.2.23	PREDICTED: ubiquitin-conjugating enzyme E2-23 kDa-like [Nelumbo nucifera]	NA	17.688	16.5408	18.3745	117.785	104.706	95.8753	90.9744	93.9967	72.8259	2.17659e-24	8.32e-23	yes
gene-GIB67_020861	GIB67_020861	26392	rna-gnl|WGS:JACGCM|KingUnif41167.1	GO:0004842(ubiquitin-protein transferase activity);GO:0005515(protein binding);GO:0005634(nucleus);GO:0005737(cytoplasm);GO:0006355(regulation of transcription, DNA-templated);GO:0006511(ubiquitin-dependent protein catabolic process);GO:0007623(circadian rhythm);GO:0009637(response to blue light);GO:0009881(photoreceptor activity);GO:0009908(flower development);GO:0009911(positive regulation of f…	04712(Circadian rhythm - plant)	K12116	NA	putative LOV domain-containing protein [Platanus occidentalis]	NA	13.9	11.2319	4.60304	92.0277	91.6572	56.5563	3.04138	3.54501	7.45314	2.23782e-24	8.53819e-23	yes
gene-GIB67_027130	GIB67_027130	3923	rna-gnl|WGS:JACGCM|KingUnif30136.1	GO:0004620(phospholipase activity);GO:0004806(triglyceride lipase activity);GO:0006629(lipid metabolic process);GO:0008970(phosphatidylcholine 1-acylhydrolase activity);GO:0009507(chloroplast);GO:0016042(lipid catabolic process);GO:0016787(hydrolase activity);GO:0047714(galactolipase activity)	00220(Arginine biosynthesis)	K00145	EC:1.2.1.38	Lipase [Macleaya cordata]	NA	6.2271	2.74855	4.71166	99.9139	87.2261	184.882	35.7353	68.2861	23.8321	2.34479e-24	8.92973e-23	yes
gene-GIB67_008259	GIB67_008259	14879	rna-gnl|WGS:JACGCM|KingUnif32649.1	GO:0005634(nucleus);GO:0005886(plasma membrane);GO:0016301(kinase activity);GO:0016310(phosphorylation)	NA	NA	NA	hypothetical protein BVC80_8935g18 [Macleaya cordata]	NA	0.94	0.787254	1.49004	25.1825	17.397	31.241	8.33892	11.1998	5.1742	2.46787e-24	9.38109e-23	yes
gene-GIB67_043252	GIB67_043252	40332	rna-gnl|WGS:JACGCM|KingUnif16721.1	NA	NA	NA	NA		NA	2.98448	2.17175	2.87923	50.3841	38.9775	56.0013	12.9663	13.1979	5.24669	2.49321e-24	9.45994e-23	yes
gene-GIB67_034313	GIB67_034313	7302	rna-gnl|WGS:JACGCM|KingUnif37345.1	GO:0046658(anchored component of plasma membrane)	NA	NA	NA	PREDICTED: mavicyanin-like [Prunus mume]	NA	19.2798	46.9886	14.0705	0	0	0.333838	0.682962	0.316119	0.223226	2.58022e-24	9.77205e-23	yes
gene-GIB67_034559	GIB67_034559	17526	rna-gnl|WGS:JACGCM|KingUnif31045.1	GO:0007154(cell communication);GO:0009505(plant-type cell wall);GO:0030247(polysaccharide binding);GO:0042973(glucan endo-1,3-beta-D-glucosidase activity);GO:0046658(anchored component of plasma membrane)	00500(Starch and sucrose metabolism)	K19891	EC:3.2.1.39	Glycoside hydrolase [Macleaya cordata]	NA	17.6584	10.3954	25.6245	211.496	197.66	160.812	52.6863	33.6949	31.05	2.75938e-24	1.04314e-22	yes
gene-GIB67_041796	GIB67_041796	39176	rna-gnl|WGS:JACGCM|KingUnif19449.1	GO:0005829(cytosol);GO:0006521(regulation of cellular amino acid metabolic process);GO:0009506(plasmodesma);GO:0009507(chloroplast);GO:0009735(response to cytokinin)	NA	NA	NA	ACT domain [Macleaya cordata]	NA	6.89391	6.26669	6.78899	44.5614	69.8903	40.2726	19.0992	15.936	20.2666	2.92058e-24	1.10205e-22	yes
gene-GIB67_031725	GIB67_031725	9700	rna-gnl|WGS:JACGCM|KingUnif25309.1	GO:0000249(C-22 sterol desaturase activity);GO:0016126(sterol biosynthetic process)	00100(Steroid biosynthesis)	K09832	EC:1.14.19.41	Cytochrome P450 [Macleaya cordata]	NA	2.86667	1.49593	3.55381	29.8714	21.1574	25.9705	3.94083	3.93007	4.70151	2.96116e-24	1.11532e-22	yes
gene-GIB67_025968	GIB67_025968	38375	rna-gnl|WGS:JACGCM|KingUnif18179.1	GO:0004029(aldehyde dehydrogenase (NAD) activity)	00010(Glycolysis / Gluconeogenesis);00053(Ascorbate and aldarate metabolism);00620(Pyruvate metabolism);00071(Fatty acid degradation);00561(Glycerolipid metabolism);00260(Glycine, serine and threonine metabolism);00280(Valine, leucine and isoleucine degradation);00310(Lysine degradation);00330(Arginine and proline metabolism);00340(Histidine metabolism);00380(Tryptophan metabolism);00410(beta-Ala…	K14085	EC:1.2.1.31;EC:1.2.1.8	Aldehyde dehydrogenase family 7 member A1 [Dichanthelium oligosanthes]	NA	36.366	29.5748	27.0498	432.965	248.324	306.292	151.157	104.949	104.256	3.10126e-24	1.16595e-22	yes
gene-GIB67_003753	GIB67_003753	19347	rna-gnl|WGS:JACGCM|KingUnif31342.1	NA	NA	NA	NA		NA	54.2497	50.8332	27.2446	5.50043	6.74471	5.41992	6.30987	8.00771	5.90811	3.14957e-24	1.18195e-22	yes
gene-GIB67_008777	GIB67_008777	2493	rna-gnl|WGS:JACGCM|KingUnif23297.1	GO:0005739(mitochondrion);GO:0009733(response to auxin)	04075(Plant hormone signal transduction)	K14488	NA	auxin-responsive protein SAUR36-like protein [Cinnamomum micranthum f. kanehirae]	NA	9.83484	8.82452	27.8196	440.063	284.038	342.339	138.098	124.061	88.5614	3.18881e-24	1.1945e-22	yes
gene-GIB67_008247	GIB67_008247	14869	rna-gnl|WGS:JACGCM|KingUnif27698.1	GO:0005783(endoplasmic reticulum);GO:0005789(endoplasmic reticulum membrane);GO:0016021(integral component of membrane);GO:0016491(oxidoreductase activity);GO:0030148(sphingolipid biosynthetic process);GO:0046872(metal ion binding);GO:0052631(sphingolipid delta-8 desaturase activity);GO:0055114(oxidation-reduction process);GO:0070417(cellular response to cold)	NA	NA	NA	hypothetical protein AQUCO_03700001v1 [Aquilegia coerulea]	NA	10.7402	39.256	7.82307	112.92	145.988	161.647	4.30844	5.71987	3.89906	3.79257e-24	1.41674e-22	yes
gene-GIB67_042362	GIB67_042362	30865	rna-gnl|WGS:JACGCM|KingUnif40568.1	GO:0003924(GTPase activity);GO:0005622(intracellular);GO:0006412(translation)	03013(RNA transport)	K03243	NA	eukaryotic translation initiation factor 5B [Prunus yedoensis var. nudiflora]	NA	0	0	0	0	0	0	3.6209	1.83313	2.56956	3.7959e-24	1.41674e-22	yes
gene-GIB67_022732	GIB67_022732	1578	rna-gnl|WGS:JACGCM|KingUnif20605.1	GO:0005886(plasma membrane);GO:0016491(oxidoreductase activity);GO:0031225(anchored component of membrane);GO:0046658(anchored component of plasma membrane);GO:0055114(oxidation-reduction process)	NA	NA	NA	Glucose/Sorbosone dehydrogenase [Macleaya cordata]	NA	3.00983	2.35709	3.75932	1.08648	1.40285	1.90809	16.7213	12.0464	15.5439	3.97209e-24	1.47982e-22	yes
gene-GIB67_027400	GIB67_027400	23594	rna-gnl|WGS:JACGCM|KingUnif01647.1	GO:0005315(inorganic phosphate transmembrane transporter activity);GO:0009536(plastid);GO:0016021(integral component of membrane);GO:0098656(anion transmembrane transport)	NA	NA	NA	Major facilitator superfamily [Macleaya cordata]	NA	5.78321	3.74581	9.09045	35.1934	39.72	52.3169	3.7166	3.7117	6.142	4.24464e-24	1.5785e-22	yes
gene-GIB67_003341	GIB67_003341	1261	rna-gnl|WGS:JACGCM|KingUnif13231.1	GO:0009416(response to light stimulus);GO:0009535(chloroplast thylakoid membrane);GO:0009768(photosynthesis, light harvesting in photosystem I);GO:0009941(chloroplast envelope);GO:0010287(plastoglobule);GO:0016168(chlorophyll binding);GO:0031409(pigment binding)	00196(Photosynthesis - antenna proteins)	K08912	NA	PREDICTED: chlorophyll a-b binding protein of LHCII type 1-like [Fragaria vesca subsp. vesca]	NA	240.855	196.006	184.561	23.1972	40.1047	13.2121	16.7836	28.7286	12.296	4.65905e-24	1.72948e-22	yes
gene-GIB67_009532	GIB67_009532	5786	rna-gnl|WGS:JACGCM|KingUnif14521.1	GO:0016020(membrane);GO:0016709(oxidoreductase activity, acting on paired donors, with incorporation or reduction of molecular oxygen, NAD(P)H as one donor, and incorporation of one atom of oxygen);GO:0044550(secondary metabolite biosynthetic process)	00941(Flavonoid biosynthesis);00944(Flavone and flavonol biosynthesis)	K05280	EC:1.14.14.82	PREDICTED: flavonoid 3'-monooxygenase-like [Nelumbo nucifera]	NA	11.7077	15.2536	18.9492	110.405	123.525	215.855	41.5923	30.888	23.5023	4.865e-24	1.80268e-22	yes
gene-GIB67_020706	GIB67_020706	4063	rna-gnl|WGS:JACGCM|KingUnif06409.1	GO:0005886(plasma membrane);GO:0016301(kinase activity);GO:0016310(phosphorylation)	NA	NA	NA	hypothetical protein AQUCO_04100057v1 [Aquilegia coerulea]	NA	0.283488	0.342126	0.696418	8.56379	11.5237	10.5691	1.97171	1.38184	3.28904	4.87923e-24	1.8047e-22	yes
gene-GIB67_032899	GIB67_032899	17120	rna-gnl|WGS:JACGCM|KingUnif42088.1	GO:0000209(protein polyubiquitination);GO:0043161(proteasome-mediated ubiquitin-dependent protein catabolic process);GO:0061630(ubiquitin protein ligase activity)	NA	NA	NA	zinc finger protein [Macleaya cordata]	NA	3.45976	3.22549	11.045	138.185	121.147	198.11	20.2775	29.9109	12.9288	5.35342e-24	1.97654e-22	yes
gene-GIB67_025424	GIB67_025424	20640	rna-gnl|WGS:JACGCM|KingUnif05346.1	GO:0002229(defense response to oomycetes);GO:0004674(protein serine/threonine kinase activity);GO:0005524(ATP binding);GO:0005886(plasma membrane);GO:0006468(protein phosphorylation);GO:0016021(integral component of membrane);GO:0016301(kinase activity);GO:0030246(carbohydrate binding)	NA	NA	NA	unnamed protein product, partial [Vitis vinifera]	NA	0.304782	0.751651	0.215233	8.984	30.2154	33.1481	3.4728	1.41701	1.55164	5.3725e-24	1.98003e-22	yes
gene-GIB67_003023	GIB67_003023	29497	rna-gnl|WGS:JACGCM|KingUnif27937.1	GO:0004674(protein serine/threonine kinase activity);GO:0005886(plasma membrane);GO:0006468(protein phosphorylation)	NA	NA	NA	G-type lectin S-receptor-like serine/threonine-protein kinase [Vitis vinifera]	NA	0.522981	0.096527	0.442823	9.18579	12.0851	15.8031	2.80456	3.46753	2.15156	5.43543e-24	1.99963e-22	yes
gene-GIB67_003098	GIB67_003098	14592	rna-gnl|WGS:JACGCM|KingUnif00091.1	GO:0034219(carbohydrate transmembrane transport)	NA	NA	NA	triose phosphate/phosphate translocator non-green plastid chloroplastic [Prunus yedoensis var. nudiflora]	NA	53.5996	105.068	52.9679	9.58714	4.43795	4.5923	14.1594	12.27	12.4995	6.14192e-24	2.25551e-22	yes
gene-GIB67_030716	GIB67_030716	39961	rna-gnl|WGS:JACGCM|KingUnif34116.1	GO:0004672(protein kinase activity);GO:0004674(protein serine/threonine kinase activity);GO:0005524(ATP binding);GO:0005886(plasma membrane);GO:0006468(protein phosphorylation);GO:0007169(transmembrane receptor protein tyrosine kinase signaling pathway);GO:0009506(plasmodesma);GO:0016021(integral component of membrane)	NA	NA	NA	hypothetical protein AQUCO_00200523v1 [Aquilegia coerulea]	NA	3.42353	3.33357	3.50597	29.3778	36.6677	42.0858	6.1477	10.7099	3.36665	6.4673e-24	2.37077e-22	yes
gene-GIB67_007682	GIB67_007682	16092	rna-gnl|WGS:JACGCM|KingUnif14993.1	NA	NA	NA	NA	PREDICTED: uncharacterized protein LOC104827030 [Tarenaya hassleriana]	NA	26.7489	29.3205	42.9984	25.8964	28.992	15.426	118.276	259.929	272.936	7.06773e-24	2.58626e-22	yes
gene-GIB67_023515	GIB67_023515	972	rna-gnl|WGS:JACGCM|KingUnif29379.1	GO:0003674(molecular_function);GO:0005575(cellular_component);GO:0008150(biological_process)	NA	NA	NA	PREDICTED: uncharacterized protein LOC104607417 [Nelumbo nucifera]	NA	0.330738	0.483605	0.720869	12.1309	7.72114	9.43949	0.671621	0.797052	1.2991	7.47938e-24	2.73203e-22	yes
gene-GIB67_019064	GIB67_019064	16724	rna-gnl|WGS:JACGCM|KingUnif15550.1	GO:0009507(chloroplast);GO:0009570(chloroplast stroma);GO:0016787(hydrolase activity);GO:0019144(ADP-sugar diphosphatase activity);GO:0046872(metal ion binding);GO:0080041(ADP-ribose pyrophosphohydrolase activity);GO:0080042(ADP-glucose pyrophosphohydrolase activity)	00051(Fructose and mannose metabolism);00500(Starch and sucrose metabolism);00230(Purine metabolism)	K18447	EC:3.6.1.21	hypothetical protein AQUCO_01300509v1 [Aquilegia coerulea]	NA	0	0	0	0	0	0	3.34965	1.82798	5.67387	8.24233e-24	3.00538e-22	yes
gene-GIB67_003544	GIB67_003544	23823	rna-gnl|WGS:JACGCM|KingUnif11452.1	GO:0004674(protein serine/threonine kinase activity);GO:0005515(protein binding);GO:0005524(ATP binding);GO:0005634(nucleus);GO:0005886(plasma membrane);GO:0006468(protein phosphorylation);GO:0009506(plasmodesma);GO:0009755(hormone-mediated signaling pathway);GO:0010183(pollen tube guidance);GO:0016020(membrane);GO:0016021(integral component of membrane);GO:0016301(kinase activity);GO:0090406(pol…	NA	NA	NA	putative leucine-rich repeat receptor-like protein kinase [Cinnamomum micranthum f. kanehirae]	NA	3.92799	3.42969	4.65121	29.8465	31.2865	52.2073	13.0583	21.3622	16.2688	8.29673e-24	3.01986e-22	yes
gene-GIB67_014321	GIB67_014321	6762	rna-gnl|WGS:JACGCM|KingUnif26353.1	GO:0005788(endoplasmic reticulum lumen);GO:0006457(protein folding);GO:0009408(response to heat);GO:0009506(plasmodesma);GO:0009860(pollen tube growth);GO:0016491(oxidoreductase activity);GO:0034605(cellular response to heat)	NA	NA	NA	hypothetical protein AQUCO_04500166v1 [Aquilegia coerulea]	NA	300.105	204.494	274.278	32.3684	34.7698	28.6353	69.2881	82.9549	43.4791	8.44836e-24	3.06962e-22	yes
gene-GIB67_006067	GIB67_006067	32500	rna-gnl|WGS:JACGCM|KingUnif39204.1	GO:0016491(oxidoreductase activity);GO:0055114(oxidation-reduction process)	NA	NA	NA	Oxidoreductase [Macleaya cordata]	NA	0.977994	0.761268	0.496525	9.37312	5.49608	4.61994	15.901	11.178	22.4724	8.79842e-24	3.19117e-22	yes
gene-GIB67_021838	GIB67_021838	1856	rna-gnl|WGS:JACGCM|KingUnif40890.1	GO:0004126(cytidine deaminase activity);GO:0005829(cytosol);GO:0008270(zinc ion binding);GO:0009972(cytidine deamination)	00240(Pyrimidine metabolism)	K01489	EC:3.5.4.5	PREDICTED: cytidine deaminase 1-like [Nelumbo nucifera]	NA	8.95556	7.56957	11.2321	76.6319	63.0841	82.0346	47.5644	50.1254	33.0376	8.82728e-24	3.196e-22	yes
gene-GIB67_014609	GIB67_014609	6124	rna-gnl|WGS:JACGCM|KingUnif11656.1	GO:0004672(protein kinase activity);GO:0004674(protein serine/threonine kinase activity);GO:0005524(ATP binding);GO:0005886(plasma membrane);GO:0006468(protein phosphorylation);GO:0009506(plasmodesma);GO:0009741(response to brassinosteroid);GO:0009742(brassinosteroid mediated signaling pathway);GO:0009791(post-embryonic development);GO:0009826(unidimensional cell growth);GO:0016021(integral compo…	NA	NA	NA	Protein kinase domain [Macleaya cordata]	NA	9.65014	6.85621	7.83945	42.5167	40.7673	49.0225	10.4218	13.6597	13.2471	1.11833e-23	4.04192e-22	yes
gene-GIB67_024033	GIB67_024033	37401	rna-gnl|WGS:JACGCM|KingUnif14798.1	GO:0000981(RNA polymerase II transcription factor activity, sequence-specific DNA binding);GO:0001135(transcription factor activity, RNA polymerase II transcription factor recruiting);GO:0003677(DNA binding);GO:0003700(DNA binding transcription factor activity);GO:0005634(nucleus);GO:0006351(transcription, DNA-templated);GO:0006355(regulation of transcription, DNA-templated);GO:0006357(regulation…	NA	NA	NA	PREDICTED: transcription factor MYB108 [Nelumbo nucifera]	NA	0.279536	0.305288	0.510904	19.2057	7.17741	17.2323	1.3779	1.75403	0.81027	1.24816e-23	4.50322e-22	yes
gene-GIB67_023638	GIB67_023638	39515	rna-gnl|WGS:JACGCM|KingUnif20759.1	NA	NA	NA	NA		NA	0.336289	0.7025	1.15015	15.4121	40.5547	39.9041	1.70023	0.38589	0.416128	1.29428e-23	4.66143e-22	yes
gene-GIB67_025435	GIB67_025435	16265	rna-gnl|WGS:JACGCM|KingUnif24315.1	GO:0004675(transmembrane receptor protein serine/threonine kinase activity);GO:0005515(protein binding);GO:0005524(ATP binding);GO:0005576(extracellular region);GO:0005886(plasma membrane);GO:0006468(protein phosphorylation);GO:0007166(cell surface receptor signaling pathway);GO:0008061(chitin binding);GO:0016021(integral component of membrane);GO:0016301(kinase activity);GO:0042803(protein homod…	NA	NA	NA	Protein kinase domain [Macleaya cordata]	NA	12.9342	14.071	20.661	107.478	143.111	133.475	56.2164	46.8223	40.1242	1.33022e-23	4.78251e-22	yes
gene-GIB67_009370	GIB67_009370	15699	rna-gnl|WGS:JACGCM|KingUnif17398.1	GO:0005634(nucleus);GO:0043565(sequence-specific DNA binding);GO:0045944(positive regulation of transcription by RNA polymerase II)	NA	NA	NA	IQ motif [Macleaya cordata]	NA	9.57011	9.35683	6.86508	20.4037	19.0921	20.2077	2.5525	3.04245	1.75163	1.35608e-23	4.86699e-22	yes
gene-GIB67_013060	GIB67_013060	24630	rna-gnl|WGS:JACGCM|KingUnif00663.1	GO:0005737(cytoplasm);GO:0005829(cytosol);GO:0046686(response to cadmium ion);GO:0046983(protein dimerization activity)	NA	NA	NA	Heat shock chaperonin-binding protein [Corchorus olitorius]	NA	722.645	777.781	733.943	77.961	98.3126	77.1342	239.521	276.063	177.272	1.40095e-23	5.01927e-22	yes
gene-GIB67_024369	GIB67_024369	35942	rna-gnl|WGS:JACGCM|KingUnif00171.1	GO:0004864(protein phosphatase inhibitor activity);GO:0005634(nucleus);GO:0005737(cytoplasm);GO:0009738(abscisic acid-activated signaling pathway);GO:0010427(abscisic acid binding);GO:0080163(regulation of protein serine/threonine phosphatase activity)	NA	NA	NA	PREDICTED: pathogenesis-related protein STH-2-like [Nelumbo nucifera]	NA	3.25241	3.4516	6.02678	47.6235	39.1617	51.0699	27.7836	25.5506	24.1842	1.54965e-23	5.54235e-22	yes
gene-GIB67_039950	GIB67_039950	3320	rna-gnl|WGS:JACGCM|KingUnif29210.1	GO:0004853(uroporphyrinogen decarboxylase activity);GO:0005829(cytosol);GO:0006783(heme biosynthetic process)	00860(Porphyrin and chlorophyll metabolism)	K01599	EC:4.1.1.37	Peptide-N4-(N-acetyl-beta-glucosaminyl)asparagine amidase A [Macleaya cordata]	NA	20.2969	24.7479	11.9369	1.81671	1.88756	1.39584	5.82092	5.81721	4.68001	1.56618e-23	5.59177e-22	yes
gene-GIB67_002179	GIB67_002179	42392	rna-gnl|WGS:JACGCM|KingUnif17730.1	NA	NA	NA	NA		NA	0.731557	0.771927	0.839075	6.80195	6.63168	4.84214	12.887	11.1585	27.4141	1.58682e-23	5.65563e-22	yes
gene-GIB67_042275	GIB67_042275	36337	rna-gnl|WGS:JACGCM|KingUnif07691.1	GO:0000287(magnesium ion binding);GO:0004743(pyruvate kinase activity);GO:0005524(ATP binding);GO:0005737(cytoplasm);GO:0006096(glycolytic process);GO:0009570(chloroplast stroma);GO:0016301(kinase activity);GO:0030955(potassium ion binding)	00010(Glycolysis / Gluconeogenesis);00620(Pyruvate metabolism);00230(Purine metabolism)	K00873	EC:2.7.1.40	hypothetical protein AQUCO_03700139v1 [Aquilegia coerulea]	NA	3.87913	3.42838	1.92821	21.9191	18.1337	26.2218	4.4183	4.57949	4.23723	1.72119e-23	6.12394e-22	yes
gene-GIB67_003965	GIB67_003965	7597	rna-gnl|WGS:JACGCM|KingUnif07160.1	GO:0004029(aldehyde dehydrogenase (NAD) activity)	00940(Phenylpropanoid biosynthesis)	K12355	EC:1.2.1.68	Aldehyde dehydrogenase domain [Macleaya cordata]	NA	22.0484	13.7901	31.153	164.047	149.132	182.136	38.0155	26.2234	28.9248	1.73335e-23	6.15654e-22	yes
gene-GIB67_032907	GIB67_032907	38781	rna-gnl|WGS:JACGCM|KingUnif40243.1	GO:0005096(GTPase activator activity);GO:0005776(autophagosome);GO:0006886(intracellular protein transport);GO:0006914(autophagy);GO:0010008(endosome membrane);GO:0017137(Rab GTPase binding);GO:0031338(regulation of vesicle fusion);GO:0042594(response to starvation);GO:0090630(activation of GTPase activity)	NA	NA	NA	Rab-GTPase-TBC domain [Macleaya cordata]	NA	2.59117	3.66169	4.07888	46.5356	22.0436	36.6976	21.6979	18.9596	17.1561	1.8207e-23	6.45565e-22	yes
gene-GIB67_007998	GIB67_007998	21000	rna-gnl|WGS:JACGCM|KingUnif22682.1	GO:0000439(core TFIIH complex);GO:0003676(nucleic acid binding);GO:0005634(nucleus);GO:0005675(holo TFIIH complex);GO:0006289(nucleotide-excision repair);GO:0006351(transcription, DNA-templated);GO:0006357(regulation of transcription by RNA polymerase II);GO:0008270(zinc ion binding)	03022(Basal transcription factors);03420(Nucleotide excision repair)	K03142	NA	hypothetical protein AQUCO_01700614v1 [Aquilegia coerulea]	NA	17.5769	44.7083	8.93919	0.762672	0.499674	0.765703	3.68196	3.33276	3.45863	2.05553e-23	7.26707e-22	yes
gene-GIB67_023423	GIB67_023423	881	rna-gnl|WGS:JACGCM|KingUnif15603.1	GO:0002239(response to oomycetes);GO:0005618(cell wall);GO:0006952(defense response);GO:0007165(signal transduction);GO:0050832(defense response to fungus)	04626(Plant-pathogen interaction)	K13466	NA	Leucine-rich repeat [Macleaya cordata]	NA	1.20654	1.38475	1.92444	16.9445	9.8499	8.58703	0.924928	1.39328	1.68082	2.05662e-23	7.26707e-22	yes
gene-GIB67_025448	GIB67_025448	16285	rna-gnl|WGS:JACGCM|KingUnif31138.1	GO:0000139(Golgi membrane);GO:0005794(Golgi apparatus);GO:0016021(integral component of membrane);GO:0042546(cell wall biogenesis);GO:0045489(pectin biosynthetic process);GO:0048531(beta-1,3-galactosyltransferase activity);GO:0071555(cell wall organization)	NA	NA	NA	PREDICTED: galactan beta-1,4-galactosyltransferase GALS1 [Nelumbo nucifera]	NA	52.3344	16.8266	23.922	0.919298	1.16845	0.662361	5.60039	15.3416	13.9785	2.09036e-23	7.37362e-22	yes
gene-GIB67_013986	GIB67_013986	36601	rna-gnl|WGS:JACGCM|KingUnif31991.1	GO:0003674(molecular_function);GO:0005634(nucleus);GO:0006351(transcription, DNA-templated);GO:0006355(regulation of transcription, DNA-templated);GO:0048511(rhythmic process)	NA	NA	NA	hypothetical protein BVC80_9029g13 [Macleaya cordata]	NA	8.40931	9.77274	5.89297	54.7893	73.1159	64.2456	20.2764	23.6048	26.6336	2.11992e-23	7.46511e-22	yes
gene-GIB67_038151	GIB67_038151	42769	rna-gnl|WGS:JACGCM|KingUnif19647.1	GO:0004674(protein serine/threonine kinase activity);GO:0005886(plasma membrane);GO:0006468(protein phosphorylation)	NA	NA	NA	hypothetical protein AQUCO_00500461v1, partial [Aquilegia coerulea]	NA	0.269369	0.291176	0.464449	13.775	10.4034	11.4561	10.9368	5.81874	6.40004	2.17727e-23	7.65394e-22	yes
gene-GIB67_029345	GIB67_029345	5837	rna-gnl|WGS:JACGCM|KingUnif14853.1	GO:0003723(RNA binding);GO:0003729(mRNA binding);GO:0005634(nucleus);GO:0008150(biological_process)	NA	NA	NA	YTH domain [Macleaya cordata]	NA	23.7563	25.613	25.5324	179.027	179.597	153.716	51.454	60.0389	63.2399	2.26572e-23	7.95128e-22	yes
gene-GIB67_026151	GIB67_026151	28018	rna-gnl|WGS:JACGCM|KingUnif30945.1	GO:0016740(transferase activity)	00790(Folate biosynthesis)	K15631	EC:2.8.1.9	hypothetical protein AQUCO_01300456v1 [Aquilegia coerulea]	NA	3.02208	1.89331	4.77278	30.9873	36.6738	57.1793	6.1009	9.91897	10.813	2.27451e-23	7.96855e-22	yes
gene-GIB67_028145	GIB67_028145	41348	rna-gnl|WGS:JACGCM|KingUnif24773.1	GO:0004364(glutathione transferase activity);GO:0005737(cytoplasm);GO:0006749(glutathione metabolic process);GO:0009407(toxin catabolic process)	00480(Glutathione metabolism)	K00799	EC:2.5.1.18	Glutathione S-transferase [Macleaya cordata]	NA	0.672308	0.370405	1.25518	52.1016	75.4566	69.999	20.2811	9.09878	2.60676	2.33736e-23	8.17481e-22	yes
gene-GIB67_027539	GIB67_027539	9241	rna-gnl|WGS:JACGCM|KingUnif26547.1	GO:0005886(plasma membrane);GO:0015112(nitrate transmembrane transporter activity);GO:0015706(nitrate transport)	00910(Nitrogen metabolism)	K02575	NA	Major facilitator superfamily [Macleaya cordata]	NA	18.083	20.7152	14.5174	87.3652	156.759	113.474	28.1496	29.7749	28.8401	2.38045e-23	8.31136e-22	yes
gene-GIB67_035260	GIB67_035260	41987	rna-gnl|WGS:JACGCM|KingUnif41741.1	GO:0004620(phospholipase activity);GO:0005737(cytoplasm);GO:0016020(membrane);GO:0047372(acylglycerol lipase activity)	NA	NA	NA	patatin-like protein 2 [Asparagus officinalis]	NA	11.4881	7.55082	17.9722	94.4103	216.814	157.828	33.983	44.0965	36.5826	2.46861e-23	8.60457e-22	yes
gene-GIB67_007142	GIB67_007142	21490	rna-gnl|WGS:JACGCM|KingUnif16056.1	GO:0006914(autophagy);GO:0043231(intracellular membrane-bounded organelle)	NA	NA	NA	WD40 repeat [Macleaya cordata]	NA	0	0	0	2.47943	2.1905	1.76996	4.89155	2.40363	5.02255	2.55652e-23	8.89591e-22	yes
gene-GIB67_008605	GIB67_008605	27222	rna-gnl|WGS:JACGCM|KingUnif33236.1	GO:0005351(carbohydrate:proton symporter activity);GO:0005355(glucose transmembrane transporter activity);GO:0005887(integral component of plasma membrane);GO:0046323(glucose import)	NA	NA	NA	hexose carrier protein HEX6 [Manihot esculenta]	NA	5.3063	3.62283	6.46778	29.1959	24.3683	29.0574	46.9266	39.9211	32.2193	2.57326e-23	8.93903e-22	yes
gene-GIB67_018428	GIB67_018428	34436	rna-gnl|WGS:JACGCM|KingUnif10634.1	GO:0000156(phosphorelay response regulator activity);GO:0000160(phosphorelay signal transduction system);GO:0003677(DNA binding);GO:0003700(DNA binding transcription factor activity);GO:0005515(protein binding);GO:0005634(nucleus);GO:0006351(transcription, DNA-templated);GO:0006355(regulation of transcription, DNA-templated);GO:0007623(circadian rhythm);GO:0009908(flower development);GO:0010031(c…	04712(Circadian rhythm - plant)	K12127	NA	Signal transduction response regulator [Macleaya cordata]	NA	20.3893	16.4517	15.2745	57.7282	57.683	53.6031	5.15475	8.0256	10.2035	2.64792e-23	9.1829e-22	yes
gene-GIB67_033819	GIB67_033819	34772	rna-gnl|WGS:JACGCM|KingUnif39995.1	GO:0016020(membrane);GO:0016709(oxidoreductase activity, acting on paired donors, with incorporation or reduction of molecular oxygen, NAD(P)H as one donor, and incorporation of one atom of oxygen);GO:0042343(indole glucosinolate metabolic process);GO:0044550(secondary metabolite biosynthetic process);GO:0098542(defense response to other organism)	NA	NA	NA	cytochrome P450 [Sinopodophyllum hexandrum]	NA	10.5109	10.7658	2.62209	0.159589	0.225691	0.033416	0.304203	0.13456	0.198519	3.03529e-23	1.05085e-21	yes
gene-GIB67_002226	GIB67_002226	42439	rna-gnl|WGS:JACGCM|KingUnif09649.1	GO:0000151(ubiquitin ligase complex);GO:0000209(protein polyubiquitination);GO:0005737(cytoplasm);GO:0031624(ubiquitin conjugating enzyme binding);GO:0032436(positive regulation of proteasomal ubiquitin-dependent protein catabolic process);GO:0061630(ubiquitin protein ligase activity)	NA	NA	NA	hypothetical protein AQUCO_02700109v1 [Aquilegia coerulea]	NA	4.01841	3.51737	6.56868	42.2489	36.8731	51.7242	25.6874	22.285	17.4866	3.24239e-23	1.12067e-21	yes
gene-GIB67_033384	GIB67_033384	31146	rna-gnl|WGS:JACGCM|KingUnif27110.1	GO:0000287(magnesium ion binding);GO:0008152(metabolic process);GO:0009507(chloroplast);GO:0010333(terpene synthase activity);GO:0016114(terpenoid biosynthetic process);GO:0034007(S-linalool synthase activity);GO:0043693(monoterpene biosynthetic process)	00909(Sesquiterpenoid and triterpenoid biosynthesis)	K14175	EC:4.2.3.48	(3S,6E)-nerolidol synthase 1, chloroplastic [Vitis vinifera]	NA	0.138748	0.054463	0.092371	12.1838	2.16397	17.1538	0.884417	0.824317	0.59356	3.72417e-23	1.28503e-21	yes
gene-GIB67_025963	GIB67_025963	38377	rna-gnl|WGS:JACGCM|KingUnif20547.1	GO:0005783(endoplasmic reticulum);GO:0016020(membrane);GO:0016788(hydrolase activity, acting on ester bonds)	NA	NA	NA	protein STRICTOSIDINE SYNTHASE-LIKE 4-like [Quercus suber]	NA	31.7679	31.3762	45.3479	18.6716	13.6796	9.941	147.486	167.505	83.8941	3.92569e-23	1.35229e-21	yes
gene-GIB67_024744	GIB67_024744	13291	rna-gnl|WGS:JACGCM|KingUnif00719.1	GO:0004674(protein serine/threonine kinase activity);GO:0005886(plasma membrane);GO:0007166(cell surface receptor signaling pathway)	NA	NA	NA	PREDICTED: putative wall-associated receptor kinase-like 16 [Nelumbo nucifera]	NA	0.052067	0.210666	0.119558	33.9759	30.8619	35.175	1.53661	0.030167	0.184654	3.97503e-23	1.367e-21	yes
gene-GIB67_030298	GIB67_030298	26643	rna-gnl|WGS:JACGCM|KingUnif09716.1	GO:0005618(cell wall);GO:0009506(plasmodesma);GO:0010497(plasmodesmata-mediated intercellular transport);GO:0033609(oxalate metabolic process);GO:0046564(oxalate decarboxylase activity);GO:2000280(regulation of root development)	NA	NA	NA	germin-like protein subfamily 2 member 4 [Manihot esculenta]	NA	1.27422	0.798021	4.35566	1.43386	4.99736	3.26349	555.134	53.5779	101.055	4.03055e-23	1.38378e-21	yes
gene-GIB67_014557	GIB67_014557	36869	rna-gnl|WGS:JACGCM|KingUnif38364.1	GO:0003674(molecular_function);GO:0005576(extracellular region);GO:0005615(extracellular space);GO:0005618(cell wall);GO:0005794(Golgi apparatus);GO:0005829(cytosol);GO:0009505(plant-type cell wall);GO:0009741(response to brassinosteroid);GO:0048046(apoplast)	NA	NA	NA	Phosphate-induced protein 1 [Macleaya cordata]	NA	0.579517	0.258307	0.657361	22.4973	11.2076	9.08554	0.578524	0.206598	0.523983	4.05869e-23	1.39112e-21	yes
gene-GIB67_034078	GIB67_034078	26878	rna-gnl|WGS:JACGCM|KingUnif41628.1	GO:0003333(amino acid transmembrane transport);GO:0015171(amino acid transmembrane transporter activity)	NA	NA	NA	PREDICTED: GABA transporter 1-like [Nelumbo nucifera]	NA	1.0017	0.493081	1.89403	38.4252	21.1726	28.5826	13.415	17.4713	9.00636	4.76024e-23	1.62886e-21	yes
gene-GIB67_000997	GIB67_000997	23406	rna-gnl|WGS:JACGCM|KingUnif39248.1	GO:0016020(membrane);GO:0016709(oxidoreductase activity, acting on paired donors, with incorporation or reduction of molecular oxygen, NAD(P)H as one donor, and incorporation of one atom of oxygen);GO:0044550(secondary metabolite biosynthetic process)	NA	NA	NA	Cytochrome P450 [Macleaya cordata]	NA	22.6499	38.7936	12.0673	0.069571	0.062082	0.462425	0	0.256152	0.052677	4.95549e-23	1.69026e-21	yes
gene-GIB67_016987	GIB67_016987	27832	rna-gnl|WGS:JACGCM|KingUnif35666.1	GO:0000023(maltose metabolic process);GO:0000025(maltose catabolic process);GO:0004134(4-alpha-glucanotransferase activity);GO:0005829(cytosol);GO:0005976(polysaccharide metabolic process);GO:0005983(starch catabolic process);GO:0009507(chloroplast);GO:0010297(heteropolysaccharide binding);GO:0102500(beta-maltose 4-alpha-glucanotransferase activity);GO:2001070(starch binding)	00500(Starch and sucrose metabolism)	K00705	EC:2.4.1.25	Carbohydrate binding module family 20 [Macleaya cordata]	NA	10.9989	7.41325	7.09688	43.7762	48.6671	67.788	14.2075	9.38093	9.81268	4.95611e-23	1.69026e-21	yes
gene-GIB67_006144	GIB67_006144	32572	rna-gnl|WGS:JACGCM|KingUnif17980.1	GO:0003825(alpha,alpha-trehalose-phosphate synthase (UDP-forming) activity);GO:0004805(trehalose-phosphatase activity);GO:0005737(cytoplasm);GO:0005739(mitochondrion);GO:0005992(trehalose biosynthetic process);GO:0016757(transferase activity, transferring glycosyl groups);GO:0070413(trehalose metabolism in response to stress)	00500(Starch and sucrose metabolism)	K16055	EC:2.4.1.15;EC:3.1.3.12	hypothetical protein AQUCO_00201274v1 [Aquilegia coerulea]	NA	9.3525	6.98369	7.50926	47.1246	47.3053	49.3202	17.1789	22.8673	19.0115	5.06174e-23	1.72342e-21	yes
gene-GIB67_038404	GIB67_038404	8060	rna-gnl|WGS:JACGCM|KingUnif11812.1	GO:0005737(cytoplasm);GO:0016747(transferase activity, transferring acyl groups other than amino-acyl groups)	NA	NA	NA	PREDICTED: benzyl alcohol O-benzoyltransferase [Nelumbo nucifera]	NA	18.7537	17.0277	29.4447	283.971	254.914	310.019	104.422	160.622	68.1909	5.29326e-23	1.79927e-21	yes
gene-GIB67_035997	GIB67_035997	16406	rna-gnl|WGS:JACGCM|KingUnif12267.1	GO:0005783(endoplasmic reticulum);GO:0005886(plasma membrane);GO:0008150(biological_process);GO:0016021(integral component of membrane)	03010(Ribosome)	K02934	NA	hypothetical protein AQUCO_03500080v1 [Aquilegia coerulea]	NA	13.441	15.3729	10.6535	59.9643	61.9302	102.679	7.05113	14.6398	9.08705	5.34641e-23	1.81434e-21	yes
gene-GIB67_002872	GIB67_002872	27159	rna-gnl|WGS:JACGCM|KingUnif01777.1	GO:0005634(nucleus);GO:0016567(protein ubiquitination)	NA	NA	NA	PREDICTED: F-box protein At1g67340 [Nelumbo nucifera]	NA	17.4387	10.7745	18.3937	18.4252	22.314	19.7079	91.8775	71.4919	77.2866	5.44202e-23	1.84374e-21	yes
gene-GIB67_022558	GIB67_022558	38701	rna-gnl|WGS:JACGCM|KingUnif27345.1	GO:0003954(NADH dehydrogenase activity);GO:0005576(extracellular region);GO:0005886(plasma membrane);GO:0016021(integral component of membrane);GO:0051536(iron-sulfur cluster binding)	NA	NA	NA	PREDICTED: CASP-like protein 2C1 [Nelumbo nucifera]	NA	11.4515	6.08327	17.5721	0.587301	2.21825	1.81488	64.0531	55.3849	32.8221	5.67352e-23	1.91901e-21	yes
gene-GIB67_033385	GIB67_033385	31149	rna-gnl|WGS:JACGCM|KingUnif02477.1	GO:0000287(magnesium ion binding);GO:0008152(metabolic process);GO:0009507(chloroplast);GO:0010333(terpene synthase activity);GO:0016114(terpenoid biosynthetic process);GO:0034007(S-linalool synthase activity);GO:0043693(monoterpene biosynthetic process)	00902(Monoterpenoid biosynthesis)	K15086	EC:4.2.3.25	TPS05 [Liquidambar formosana]	NA	0	0.036438	0	10.3395	2.80671	16.2339	1.74989	0.832836	2.27096	5.89715e-23	1.99138e-21	yes
gene-GIB67_007181	GIB67_007181	11977	rna-gnl|WGS:JACGCM|KingUnif29286.1	GO:0003785(actin monomer binding);GO:0005524(ATP binding);GO:0005634(nucleus);GO:0005886(plasma membrane);GO:0016307(phosphatidylinositol phosphate kinase activity);GO:0016308(1-phosphatidylinositol-4-phosphate 5-kinase activity);GO:0046854(phosphatidylinositol phosphorylation);GO:0051015(actin filament binding)	00562(Inositol phosphate metabolism);04070(Phosphatidylinositol signaling system);04144(Endocytosis)	K00889	EC:2.7.1.68	PREDICTED: phosphatidylinositol 4-phosphate 5-kinase 1-like [Nelumbo nucifera]	NA	2.29143	1.66005	1.65359	19.3333	12.8641	13.9478	3.14662	3.31306	2.3619	6.74833e-23	2.27507e-21	yes
gene-GIB67_026982	GIB67_026982	3770	rna-gnl|WGS:JACGCM|KingUnif25999.1	GO:0005737(cytoplasm);GO:0008757(S-adenosylmethionine-dependent methyltransferase activity);GO:0032259(methylation)	00130(Ubiquinone and other terpenoid-quinone biosynthesis)	K12502	EC:2.1.1.295	PREDICTED: 2-methyl-6-phytyl-1,4-hydroquinone methyltransferase, chloroplastic [Nelumbo nucifera]	NA	3.13068	2.60389	8.31784	0	0.039835	0	0	0.07422	0	7.05799e-23	2.37557e-21	yes
gene-GIB67_033073	GIB67_033073	17309	rna-gnl|WGS:JACGCM|KingUnif26626.1	GO:0003674(molecular_function);GO:0005634(nucleus);GO:0009507(chloroplast);GO:0030162(regulation of proteolysis);GO:0031625(ubiquitin protein ligase binding)	NA	NA	NA	hypothetical protein AQUCO_00200553v1 [Aquilegia coerulea]	NA	9.26658	8.31899	15.8253	106.522	60.53	85.4905	16.7667	20.74	13.0312	7.18328e-23	2.41379e-21	yes
gene-GIB67_041629	GIB67_041629	20052	rna-gnl|WGS:JACGCM|KingUnif33940.1	GO:0003677(DNA binding);GO:0003697(single-stranded DNA binding);GO:0003896(DNA primase activity);GO:0004003(ATP-dependent DNA helicase activity);GO:0005524(ATP binding);GO:0005739(mitochondrion);GO:0006269(DNA replication, synthesis of RNA primer);GO:0009260(ribonucleotide biosynthetic process);GO:0009507(chloroplast);GO:0046872(metal ion binding)	NA	NA	NA	hypothetical protein COLO4_22894 [Corchorus olitorius]	NA	27.0212	39.2819	12.9236	2.64427	1.90615	1.50762	0.658416	0.312508	1.35909	7.48415e-23	2.51079e-21	yes
gene-GIB67_014276	GIB67_014276	28347	rna-gnl|WGS:JACGCM|KingUnif37127.1	GO:0006629(lipid metabolic process);GO:0016020(membrane);GO:0016298(lipase activity)	00561(Glycerolipid metabolism)	K01054	EC:3.1.1.23	PREDICTED: caffeoylshikimate esterase-like [Nelumbo nucifera]	NA	3.73783	2.34367	6.82601	68.4381	58.6223	65.5564	26.448	26.7281	14.0904	8.77465e-23	2.93894e-21	yes
gene-GIB67_005212	GIB67_005212	8577	rna-gnl|WGS:JACGCM|KingUnif00843.1	GO:0005545(1-phosphatidylinositol binding);GO:0005739(mitochondrion);GO:0005794(Golgi apparatus);GO:0005905(clathrin-coated pit);GO:0006897(endocytosis);GO:0030136(clathrin-coated vesicle);GO:0030276(clathrin binding);GO:0048268(clathrin coat assembly)	NA	NA	NA	hypothetical protein AQUCO_00201195v1 [Aquilegia coerulea]	NA	1.44842	0.739558	2.45066	21.1011	31.5501	41.6909	9.13432	7.70452	9.01785	8.80931e-23	2.94575e-21	yes
gene-GIB67_017399	GIB67_017399	27386	rna-gnl|WGS:JACGCM|KingUnif34523.1	GO:0004675(transmembrane receptor protein serine/threonine kinase activity);GO:0005524(ATP binding);GO:0005886(plasma membrane);GO:0006468(protein phosphorylation);GO:0007166(cell surface receptor signaling pathway);GO:0008061(chitin binding);GO:0009507(chloroplast);GO:0016021(integral component of membrane);GO:0016301(kinase activity);GO:0045087(innate immune response);GO:0071219(cellular respon…	NA	NA	NA	Protein kinase domain [Macleaya cordata]	NA	0.777644	0.560943	1.03039	10.6408	7.6852	13.537	4.957	4.07634	3.46332	9.156e-23	3.05671e-21	yes
gene-GIB67_014319	GIB67_014319	6760	rna-gnl|WGS:JACGCM|KingUnif00412.1	GO:0015079(potassium ion transmembrane transporter activity);GO:0016020(membrane)	NA	NA	NA	hypothetical protein AQUCO_04500167v1 [Aquilegia coerulea]	NA	8.92035	6.18102	10.2196	3.05414	3.23767	2.41709	16.416	31.2232	28.1336	9.92814e-23	3.30911e-21	yes
gene-GIB67_016706	GIB67_016706	33369	rna-gnl|WGS:JACGCM|KingUnif39128.1	GO:0009409(response to cold);GO:0009507(chloroplast);GO:0009535(chloroplast thylakoid membrane);GO:0009570(chloroplast stroma);GO:0009695(jasmonic acid biosynthetic process);GO:0009941(chloroplast envelope);GO:0010319(stromule);GO:0046423(allene-oxide cyclase activity)	00592(alpha-Linolenic acid metabolism)	K10525	EC:5.3.99.6	hypothetical protein AQUCO_02600227v1 [Aquilegia coerulea]	NA	3.87805	2.34641	5.54	39.3061	27.4096	27.7066	5.36328	3.79596	4.52843	1.00806e-22	3.35448e-21	yes
gene-GIB67_027132	GIB67_027132	3919	rna-gnl|WGS:JACGCM|KingUnif23040.1	GO:0000325(plant-type vacuole);GO:0004540(ribonuclease activity);GO:0004568(chitinase activity);GO:0005576(extracellular region);GO:0008061(chitin binding);GO:0009615(response to virus);GO:0009627(systemic acquired resistance);GO:0009651(response to salt stress);GO:0009723(response to ethylene);GO:0009817(defense response to fungus, incompatible interaction);GO:0031640(killing of cells of other o…	00520(Amino sugar and nucleotide sugar metabolism);04016(MAPK signaling pathway - plant)	K20547	EC:3.2.1.14	pathogenesis-related protein PR-4 [Populus trichocarpa]	NA	65.5774	52.3454	114.195	34.9951	32.5783	25.7442	418.392	622.713	200.663	1.1107e-22	3.69008e-21	yes
gene-GIB67_002708	GIB67_002708	34380	rna-gnl|WGS:JACGCM|KingUnif18974.1	GO:0009416(response to light stimulus);GO:0045487(gibberellin catabolic process);GO:0052634(C-19 gibberellin 2-beta-dioxygenase activity)	00904(Diterpenoid biosynthesis)	K04125	EC:1.14.11.13	hypothetical protein AQUCO_02200209v1 [Aquilegia coerulea]	NA	3.54926	0.822451	3.57429	63.9607	20.085	40.6096	2.33615	1.2128	1.01332	1.17125e-22	3.88495e-21	yes
gene-GIB67_011125	GIB67_011125	829	rna-gnl|WGS:JACGCM|KingUnif10569.1	GO:0005576(extracellular region);GO:0005768(endosome);GO:0005794(Golgi apparatus);GO:0005802(trans-Golgi network);GO:0006950(response to stress);GO:0009269(response to desiccation);GO:0009651(response to salt stress);GO:0009737(response to abscisic acid);GO:0045735(nutrient reservoir activity)	NA	NA	NA	BURP domain [Macleaya cordata]	NA	13.3589	11.0628	12.0036	33.7318	42.0988	25.9852	78.6498	71.5739	76.83	1.48181e-22	4.90714e-21	yes
gene-GIB67_036661	GIB67_036661	30049	rna-gnl|WGS:JACGCM|KingUnif19909.1	GO:0003735(structural constituent of ribosome);GO:0006412(translation)	NA	NA	NA	Mitochondrial carrier protein [Macleaya cordata]	NA	39.4721	34.9596	42.0345	374.949	271.381	270.065	138.609	143.334	143.413	1.61202e-22	5.32976e-21	yes
gene-GIB67_003258	GIB67_003258	29803	rna-gnl|WGS:JACGCM|KingUnif19502.1	GO:0005524(ATP binding);GO:0005618(cell wall);GO:0005739(mitochondrion);GO:0005759(mitochondrial matrix);GO:0005774(vacuolar membrane);GO:0005794(Golgi apparatus);GO:0005829(cytosol);GO:0006457(protein folding);GO:0008270(zinc ion binding);GO:0009408(response to heat);GO:0009651(response to salt stress);GO:0009735(response to cytokinin);GO:0034620(cellular response to unfolded protein);GO:0044183…	03018(RNA degradation)	K04043	NA	PREDICTED: heat shock 70 kDa protein, mitochondrial isoform X2 [Nelumbo nucifera]	NA	192.475	260.09	161.663	26.0496	32.7728	24.59	75.4167	63.7659	57.2666	1.64494e-22	5.4299e-21	yes
gene-GIB67_033436	GIB67_033436	31201	rna-gnl|WGS:JACGCM|KingUnif40271.1	GO:0003978(UDP-glucose 4-epimerase activity);GO:0005794(Golgi apparatus);GO:0006012(galactose metabolic process);GO:0046983(protein dimerization activity)	00052(Galactose metabolism);00520(Amino sugar and nucleotide sugar metabolism)	K01784	EC:5.1.3.2	PREDICTED: UDP-glucose 4-epimerase GEPI48 [Nelumbo nucifera]	NA	10.5947	8.77352	15.8677	78.4499	89.2132	81.7802	36.7955	33.0202	26.9258	1.70938e-22	5.63355e-21	yes
gene-GIB67_026301	GIB67_026301	14694	rna-gnl|WGS:JACGCM|KingUnif27183.1	GO:0005515(protein binding);GO:0005737(cytoplasm);GO:0005829(cytosol);GO:0009809(lignin biosynthetic process);GO:0009963(positive regulation of flavonoid biosynthetic process);GO:0010252(auxin homeostasis);GO:0016020(membrane);GO:0016740(transferase activity);GO:0047172(shikimate O-hydroxycinnamoyltransferase activity);GO:0047205(quinate O-hydroxycinnamoyltransferase activity);GO:0071555(cell wal…	00940(Phenylpropanoid biosynthesis);00945(Stilbenoid, diarylheptanoid and gingerol biosynthesis);00941(Flavonoid biosynthesis)	K13065	EC:2.3.1.133	hydroxycinnamoyl transferase [Sinopodophyllum hexandrum]	NA	2.02188	1.05617	4.71618	99.1186	64.6341	69.2782	10.8341	15.9122	4.41691	1.73904e-22	5.72215e-21	yes
gene-GIB67_003256	GIB67_003256	29805	rna-gnl|WGS:JACGCM|KingUnif05242.1	GO:0005524(ATP binding);GO:0005618(cell wall);GO:0005739(mitochondrion);GO:0005759(mitochondrial matrix);GO:0005774(vacuolar membrane);GO:0005794(Golgi apparatus);GO:0005829(cytosol);GO:0006457(protein folding);GO:0008270(zinc ion binding);GO:0009408(response to heat);GO:0009651(response to salt stress);GO:0009735(response to cytokinin);GO:0034620(cellular response to unfolded protein);GO:0044183…	03018(RNA degradation)	K04043	NA	heat shock protein, mitochondrial [Cinnamomum micranthum f. kanehirae]	NA	75.2722	95.9526	55.7026	10.8655	11.5124	7.05909	28.0675	24.4862	26.552	2.01675e-22	6.62531e-21	yes
gene-GIB67_018662	GIB67_018662	28132	rna-gnl|WGS:JACGCM|KingUnif05502.1	GO:0003333(amino acid transmembrane transport);GO:0015171(amino acid transmembrane transporter activity)	NA	NA	NA	PREDICTED: vacuolar amino acid transporter 1 isoform X1 [Nelumbo nucifera]	NA	63.5141	108.662	33.8337	6.72292	9.72031	8.21012	5.34752	4.71492	10.3269	2.02305e-22	6.63542e-21	yes
gene-GIB67_036137	GIB67_036137	13525	rna-gnl|WGS:JACGCM|KingUnif30290.1	GO:0004497(monooxygenase activity);GO:0044550(secondary metabolite biosynthetic process)	00906(Carotenoid biosynthesis)	K09838	EC:1.14.15.21	PREDICTED: uncharacterized protein LOC104599917 [Nelumbo nucifera]	NA	12.6636	14.613	9.65323	1.6587	0.80124	1.30661	21.7013	18.4665	12.6167	2.337e-22	7.65293e-21	yes
gene-GIB67_027100	GIB67_027100	3890	rna-gnl|WGS:JACGCM|KingUnif40905.1	GO:0003674(molecular_function);GO:0005634(nucleus);GO:0051513(regulation of monopolar cell growth)	NA	NA	NA	PREDICTED: protein LONGIFOLIA 1-like [Nelumbo nucifera]	NA	17.6964	28.4604	6.01096	0.884406	1.71516	1.01754	1.31584	1.40068	0.760488	2.40513e-22	7.86351e-21	yes
gene-GIB67_018232	GIB67_018232	8887	rna-gnl|WGS:JACGCM|KingUnif10146.1	GO:0004561(alpha-N-acetylglucosaminidase activity);GO:0005773(vacuole);GO:0008152(metabolic process);GO:0009507(chloroplast);GO:0009793(embryo development ending in seed dormancy);GO:0051781(positive regulation of cell division)	00531(Glycosaminoglycan degradation)	K01205	EC:3.2.1.50	Alpha-N-acetylglucosaminidase [Macleaya cordata]	NA	39.0549	154.423	19.6751	4.85876	3.57827	3.56278	3.46426	2.57206	2.70345	2.43514e-22	7.94898e-21	yes
gene-GIB67_004617	GIB67_004617	24374	rna-gnl|WGS:JACGCM|KingUnif37330.1	GO:0005575(cellular_component);GO:0006952(defense response);GO:0016788(hydrolase activity, acting on ester bonds);GO:0019863(IgE binding)	00511(Other glycan degradation)	K01206	EC:3.2.1.51	PREDICTED: esterase-like isoform X1 [Nelumbo nucifera]	NA	0	0	0	11.2755	2.4923	3.03637	0.157057	0	0.056479	2.61415e-22	8.5198e-21	yes
gene-GIB67_012201	GIB67_012201	11680	rna-gnl|WGS:JACGCM|KingUnif40999.1	GO:0005737(cytoplasm)	NA	NA	NA	uncharacterized protein LOC105629574 [Jatropha curcas]	NA	5.66987	0.915889	8.36579	168.434	92.836	161.828	11.76	8.42912	5.06717	2.77455e-22	9.02825e-21	yes
gene-GIB67_005946	GIB67_005946	24882	rna-gnl|WGS:JACGCM|KingUnif02046.1	GO:0004144(diacylglycerol O-acyltransferase activity);GO:0005789(endoplasmic reticulum membrane);GO:0009941(chloroplast envelope);GO:0019432(triglyceride biosynthetic process)	00561(Glycerolipid metabolism)	K11155	EC:2.3.1.20;EC:2.3.1.75	Membrane bound O-acyl transferase [Macleaya cordata]	NA	5.21309	3.67793	4.00683	20.6371	20.5825	26.0772	6.0971	4.65507	6.19056	2.85444e-22	9.27354e-21	yes
gene-GIB67_011106	GIB67_011106	807	rna-gnl|WGS:JACGCM|KingUnif03503.1	NA	NA	NA	NA	hypothetical protein BVC80_9069g38 [Macleaya cordata]	NA	0.658656	0.589445	2.06123	71.5048	88.3746	42.02	32.5131	29.3935	13.5537	2.96943e-22	9.6319e-21	yes
gene-GIB67_041010	GIB67_041010	12455	rna-gnl|WGS:JACGCM|KingUnif25247.1	GO:0003674(molecular_function);GO:0005634(nucleus);GO:0008150(biological_process);GO:0016021(integral component of membrane)	NA	NA	NA	Protein of unknown function DUF2838 [Macleaya cordata]	NA	46.6544	35.9796	42.2677	226.525	181.374	187.034	48.3576	50.2758	45.4689	3.46993e-22	1.12377e-20	yes
gene-GIB67_017821	GIB67_017821	20540	rna-gnl|WGS:JACGCM|KingUnif35536.1	GO:0046658(anchored component of plasma membrane)	NA	NA	NA	PREDICTED: cucumber peeling cupredoxin-like [Nicotiana tomentosiformis]	NA	72.8978	60.8645	143.564	1034.39	1365.44	1848.82	353.237	285.645	178.129	3.52613e-22	1.14017e-20	yes
gene-GIB67_008918	GIB67_008918	30536	rna-gnl|WGS:JACGCM|KingUnif02215.1	GO:0016165(linoleate 13S-lipoxygenase activity)	00591(Linoleic acid metabolism);00592(alpha-Linolenic acid metabolism)	K00454	EC:1.13.11.12	hypothetical protein AQUCO_02000491v1 [Aquilegia coerulea]	NA	14.639	19.7028	19.5228	181.46	156.968	277.159	67.7605	58.3068	32.8042	3.57032e-22	1.15265e-20	yes
gene-GIB67_013400	GIB67_013400	32143	rna-gnl|WGS:JACGCM|KingUnif05276.1	GO:0016020(membrane);GO:0016709(oxidoreductase activity, acting on paired donors, with incorporation or reduction of molecular oxygen, NAD(P)H as one donor, and incorporation of one atom of oxygen);GO:0044550(secondary metabolite biosynthetic process)	NA	NA	NA	Premnaspirodiene oxygenase [Actinidia chinensis var. chinensis]	NA	0.981356	0.549057	0.970379	27.611	9.63339	33.9665	4.67531	3.69871	7.67042	3.59966e-22	1.1603e-20	yes
gene-GIB67_016507	GIB67_016507	26196	rna-gnl|WGS:JACGCM|KingUnif09610.1	GO:0043161(proteasome-mediated ubiquitin-dependent protein catabolic process);GO:0061630(ubiquitin protein ligase activity)	NA	NA	NA	zinc finger protein [Macleaya cordata]	NA	13.9456	6.45701	19.4097	160.974	139.248	155.403	42.3353	46.8305	28.0717	4.31223e-22	1.38781e-20	yes
gene-GIB67_039562	GIB67_039562	2128	rna-gnl|WGS:JACGCM|KingUnif22032.1	GO:0003677(DNA binding);GO:0003700(DNA binding transcription factor activity);GO:0005622(intracellular);GO:0005634(nucleus);GO:0006351(transcription, DNA-templated);GO:0006355(regulation of transcription, DNA-templated);GO:0009873(ethylene-activated signaling pathway)	04016(MAPK signaling pathway - plant);04075(Plant hormone signal transduction)	K14516	NA	ethylene-responsive transcription factor ERF095 [Prunus yedoensis var. nudiflora]	NA	7.16381	2.35579	10.362	3.07452	1.2678	1.92948	55.0548	83.1537	43.3511	4.3539e-22	1.39903e-20	yes
gene-GIB67_003923	GIB67_003923	34268	rna-gnl|WGS:JACGCM|KingUnif21294.1	GO:0005886(plasma membrane)	NA	NA	NA	uncharacterized protein LOC18035886 [Citrus clementina]	NA	7.08107	4.62343	5.17292	34.9319	46.4688	36.3547	14.571	10.8713	9.64275	4.38365e-22	1.40639e-20	yes
gene-GIB67_011821	GIB67_011821	5289	rna-gnl|WGS:JACGCM|KingUnif35517.1	GO:0003674(molecular_function);GO:0005575(cellular_component);GO:0009061(anaerobic respiration)	NA	NA	NA	PREDICTED: uncharacterized protein LOC100244210 [Vitis vinifera]	NA	2.98596	1.56718	7.70545	142.068	92.159	95.6066	43.9698	46.6217	31.7101	4.76943e-22	1.52778e-20	yes
gene-GIB67_016034	GIB67_016034	40548	rna-gnl|WGS:JACGCM|KingUnif16202.1	GO:0005313(L-glutamate transmembrane transporter activity);GO:0005887(integral component of plasma membrane);GO:0015189(L-lysine transmembrane transporter activity);GO:0015297(antiporter activity);GO:0051938(L-glutamate import);GO:1903401(L-lysine transmembrane transport)	NA	NA	NA	hypothetical protein AQUCO_03900118v1 [Aquilegia coerulea]	NA	10.3692	14.151	10.0329	1.15926	2.6517	2.67655	23.1435	25.8906	24.2266	4.92531e-22	1.57526e-20	yes
gene-GIB67_008105	GIB67_008105	24549	rna-gnl|WGS:JACGCM|KingUnif00887.1	NA	NA	NA	NA	hypothetical protein AQUCO_00100569v1 [Aquilegia coerulea]	NA	3.65855	3.67573	4.79542	25.6671	41.7252	28.6364	2.601	3.34092	1.20461	4.98352e-22	1.5914e-20	yes
gene-GIB67_012786	GIB67_012786	11340	rna-gnl|WGS:JACGCM|KingUnif13783.1	GO:0000981(RNA polymerase II transcription factor activity, sequence-specific DNA binding);GO:0001135(transcription factor activity, RNA polymerase II transcription factor recruiting);GO:0003677(DNA binding);GO:0003700(DNA binding transcription factor activity);GO:0005515(protein binding);GO:0005634(nucleus);GO:0006351(transcription, DNA-templated);GO:0006355(regulation of transcription, DNA-temp…	NA	NA	NA	unnamed protein product, partial [Vitis vinifera]	NA	7.47495	3.94989	8.3881	70.1083	49.4913	128.43	24.9624	24.4545	20.9715	5.02255e-22	1.60138e-20	yes
gene-GIB67_028685	GIB67_028685	13139	rna-gnl|WGS:JACGCM|KingUnif09795.1	GO:0005634(nucleus);GO:0005737(cytoplasm)	00260(Glycine, serine and threonine metabolism);00350(Tyrosine metabolism);00360(Phenylalanine metabolism);00410(beta-Alanine metabolism);00950(Isoquinoline alkaloid biosynthesis);00960(Tropane, piperidine and pyridine alkaloid biosynthesis)	K00276	EC:1.4.3.21	Armadillo [Macleaya cordata]	NA	5.33624	4.91645	8.01489	39.6655	33.0665	39.4686	10.9848	12.4329	9.23549	5.35194e-22	1.70376e-20	yes
gene-GIB67_031193	GIB67_031193	9550	rna-gnl|WGS:JACGCM|KingUnif12568.1	GO:0000287(magnesium ion binding);GO:0006518(peptide metabolic process);GO:0016854(racemase and epimerase activity)	04626(Plant-pathogen interaction)	K13466	NA	Leucine-rich repeat [Macleaya cordata]	NA	0.263584	0.10519	0.231874	6.6332	4.06873	5.59112	2.3314	1.26233	2.76544	5.36074e-22	1.70392e-20	yes
gene-GIB67_000758	GIB67_000758	12130	rna-gnl|WGS:JACGCM|KingUnif30622.1	GO:0005737(cytoplasm);GO:0005980(glycogen catabolic process);GO:0008184(glycogen phosphorylase activity);GO:0030170(pyridoxal phosphate binding)	00500(Starch and sucrose metabolism)	K00688	EC:2.4.1.1	PREDICTED: alpha-1,4 glucan phosphorylase L-2 isozyme, chloroplastic/amyloplastic [Nelumbo nucifera]	NA	21.2048	23.2097	33.496	273.671	155.694	282.504	64.7775	55.2323	50.3179	5.55097e-22	1.76166e-20	yes
gene-GIB67_004646	GIB67_004646	24414	rna-gnl|WGS:JACGCM|KingUnif31967.1	GO:0004028(3-chloroallyl aldehyde dehydrogenase activity);GO:0004029(aldehyde dehydrogenase (NAD) activity)	00010(Glycolysis / Gluconeogenesis);00053(Ascorbate and aldarate metabolism);00620(Pyruvate metabolism);00071(Fatty acid degradation);00561(Glycerolipid metabolism);00280(Valine, leucine and isoleucine degradation);00310(Lysine degradation);00330(Arginine and proline metabolism);00340(Histidine metabolism);00380(Tryptophan metabolism);00410(beta-Alanine metabolism);00903(Limonene and pinene degra…	K00128	EC:1.2.1.3	Aldehyde dehydrogenase NAD(P)-dependent [Macleaya cordata]	NA	43.446	32.5032	46.251	233.333	202.597	263.685	67.7024	62.5506	59.5423	5.80081e-22	1.83812e-20	yes
gene-GIB67_005834	GIB67_005834	30992	rna-gnl|WGS:JACGCM|KingUnif14107.1	GO:0004012(phospholipid-translocating ATPase activity);GO:0005802(trans-Golgi network);GO:0005886(plasma membrane);GO:0048194(Golgi vesicle budding)	NA	NA	NA	Cation-transporting P-type ATPase [Macleaya cordata]	NA	74.1531	180.971	50.1454	11.5029	9.30491	10.003	10.6772	15.1327	14.1684	5.90979e-22	1.86977e-20	yes
gene-GIB67_027556	GIB67_027556	9256	rna-gnl|WGS:JACGCM|KingUnif02944.1	GO:0005524(ATP binding);GO:0005739(mitochondrion);GO:0005829(cytosol);GO:0006457(protein folding);GO:0006458('de novo' protein folding);GO:0007005(mitochondrion organization);GO:0009507(chloroplast);GO:0009570(chloroplast stroma);GO:0009579(thylakoid);GO:0009658(chloroplast organization);GO:0009793(embryo development ending in seed dormancy);GO:0009941(chloroplast envelope);GO:0016020(membrane);G…	03018(RNA degradation)	K04077	NA	Chaperonin Cpn60 [Macleaya cordata]	NA	325.201	324.873	260.012	28.4355	46.0304	36.4473	102.689	93.7456	64.5195	6.18343e-22	1.95334e-20	yes
gene-GIB67_031937	GIB67_031937	6655	rna-gnl|WGS:JACGCM|KingUnif28821.1	GO:0003677(DNA binding);GO:0003700(DNA binding transcription factor activity);GO:0005634(nucleus);GO:0005992(trehalose biosynthetic process);GO:0006351(transcription, DNA-templated);GO:0006355(regulation of transcription, DNA-templated);GO:0006561(proline biosynthetic process);GO:0007275(multicellular organism development);GO:0009718(anthocyanin-containing compound biosynthetic process);GO:001012…	04141(Protein processing in endoplasmic reticulum);04120(Ubiquitin mediated proteolysis)	K03094	NA	PREDICTED: transcription factor JUNGBRUNNEN 1-like [Nelumbo nucifera]	NA	1.19833	1.8553	1.78107	23.9288	18.8803	19.13	8.35182	9.41853	5.99526	6.4375e-22	2.03048e-20	yes
gene-GIB67_011109	GIB67_011109	818	rna-gnl|WGS:JACGCM|KingUnif13678.1	GO:0004674(protein serine/threonine kinase activity);GO:0005886(plasma membrane);GO:0006468(protein phosphorylation)	NA	NA	NA	putative receptor-like protein kinase [Ananas comosus]	NA	4.7349	5.34947	2.0185	0.027986	0.124756	0.061807	0.180442	0.051387	0.177777	6.58768e-22	2.07467e-20	yes
gene-GIB67_000239	GIB67_000239	36877	rna-gnl|WGS:JACGCM|KingUnif11541.1	GO:0009813(flavonoid biosynthetic process);GO:0043231(intracellular membrane-bounded organelle);GO:0052696(flavonoid glucuronidation);GO:0080043(quercetin 3-O-glucosyltransferase activity);GO:0080044(quercetin 7-O-glucosyltransferase activity)	NA	NA	NA	UDP-glycosyltransferase 86A2-like [Durio zibethinus]	NA	2.0103	1.13254	3.28135	41.4304	27.0437	30.5419	13.4086	16.689	10.1478	6.66814e-22	2.09679e-20	yes
gene-GIB67_007072	GIB67_007072	4736	rna-gnl|WGS:JACGCM|KingUnif35856.1	GO:0009813(flavonoid biosynthetic process);GO:0043231(intracellular membrane-bounded organelle);GO:0052696(flavonoid glucuronidation);GO:0080043(quercetin 3-O-glucosyltransferase activity);GO:0080044(quercetin 7-O-glucosyltransferase activity)	NA	NA	NA	UDP-glucuronosyl/UDP-glucosyltransferase [Macleaya cordata]	NA	0.83679	0.195621	0.23583	22.28	17.6848	12.7528	0.908017	2.22702	1.10615	6.82022e-22	2.14134e-20	yes
gene-GIB67_028064	GIB67_028064	40814	rna-gnl|WGS:JACGCM|KingUnif08534.1	GO:0005739(mitochondrion);GO:0006400(tRNA modification);GO:0052381(tRNA dimethylallyltransferase activity)	00908(Zeatin biosynthesis)	K10760	EC:2.5.1.27;EC:2.5.1.112	tRNA isopentenyltransferase [Macleaya cordata]	NA	0.88594	0.638984	0.714915	23.2414	19.9676	8.6525	10.7367	13.3769	10.874	7.5983e-22	2.382e-20	yes
gene-GIB67_038318	GIB67_038318	43150	rna-gnl|WGS:JACGCM|KingUnif10729.1	GO:0015079(potassium ion transmembrane transporter activity);GO:0016020(membrane)	NA	NA	NA	hypothetical protein AQUCO_01100472v1 [Aquilegia coerulea]	NA	24.436	87.7455	21.1294	2.05231	1.4741	2.03284	4.21558	4.55392	1.24178	7.62867e-22	2.38788e-20	yes
gene-GIB67_003016	GIB67_003016	29494	rna-gnl|WGS:JACGCM|KingUnif14120.1	GO:0045431(flavonol synthase activity)	00941(Flavonoid biosynthesis)	K05278	EC:1.14.20.6	Oxoglutarate/iron-dependent dioxygenase [Macleaya cordata]	NA	0.329462	0	0.121017	12.768	11.7536	27.0465	16.4558	16	9.10209	7.74971e-22	2.42208e-20	yes
gene-GIB67_006332	GIB67_006332	4131	rna-gnl|WGS:JACGCM|KingUnif13943.1	GO:0005451(monovalent cation:proton antiporter activity);GO:0006885(regulation of pH);GO:0012505(endomembrane system)	NA	NA	NA	hypothetical protein AQUCO_02600345v1 [Aquilegia coerulea]	NA	1.3298	0.294376	1.81338	78.407	52.8773	111.333	30.9973	13.7189	8.56142	8.17325e-22	2.55058e-20	yes
gene-GIB67_016131	GIB67_016131	40645	rna-gnl|WGS:JACGCM|KingUnif12107.1	GO:0005737(cytoplasm);GO:0016740(transferase activity);GO:0016747(transferase activity, transferring acyl groups other than amino-acyl groups)	NA	NA	NA	hypothetical protein AQUCO_05500076v1 [Aquilegia coerulea]	NA	9.00085	5.58422	8.09306	50.753	44.9873	53.1703	14.769	20.7972	13.1226	8.19097e-22	2.55223e-20	yes
gene-GIB67_036265	GIB67_036265	40792	rna-gnl|WGS:JACGCM|KingUnif41755.1	GO:0000027(ribosomal large subunit assembly);GO:0003735(structural constituent of ribosome);GO:0006412(translation);GO:0022625(cytosolic large ribosomal subunit)	03010(Ribosome)	K02925	NA	Ribosomal protein, partial [Parasponia andersonii]	NA	22.542	18.8181	20.4647	61.9846	108.147	68.3906	347.057	176.898	161.801	8.25254e-22	2.56753e-20	yes
gene-GIB67_003752	GIB67_003752	19346	rna-gnl|WGS:JACGCM|KingUnif17100.1	GO:0004190(aspartic-type endopeptidase activity);GO:0006508(proteolysis);GO:0030163(protein catabolic process)	03013(RNA transport);03008(Ribosome biogenesis in eukaryotes)	K14525	EC:3.1.26.5	glycine-rich protein DOT1 [Amborella trichopoda]	NA	85.5015	74.4548	46.3058	10.3897	12.122	12.9741	14.0556	9.41853	9.34244	8.57589e-22	2.6641e-20	yes
gene-GIB67_016062	GIB67_016062	40570	rna-gnl|WGS:JACGCM|KingUnif05534.1	GO:0009416(response to light stimulus);GO:0009535(chloroplast thylakoid membrane);GO:0009768(photosynthesis, light harvesting in photosystem I);GO:0009941(chloroplast envelope);GO:0010287(plastoglobule);GO:0016168(chlorophyll binding);GO:0031409(pigment binding)	00196(Photosynthesis - antenna proteins)	K08912	NA	uncharacterized protein LOC112184868 [Rosa chinensis]	NA	145.381	133.4	98.6383	33.8896	73.7011	25.2177	5.254	9.77404	3.64316	9.64158e-22	2.99063e-20	yes
gene-GIB67_030950	GIB67_030950	40197	rna-gnl|WGS:JACGCM|KingUnif19303.1	GO:0005886(plasma membrane);GO:0009611(response to wounding);GO:0010167(response to nitrate);GO:0015112(nitrate transmembrane transporter activity);GO:0015706(nitrate transport);GO:0016021(integral component of membrane);GO:0042128(nitrate assimilation)	NA	NA	NA	PREDICTED: high-affinity nitrate transporter-activating protein 2.1-like [Nelumbo nucifera]	NA	4.89439	7.08913	11.8987	84.212	195.439	88.1477	64.6173	62.2969	66.028	1.13516e-21	3.51574e-20	yes
gene-GIB67_037470	GIB67_037470	17117	rna-gnl|WGS:JACGCM|KingUnif29414.1	GO:0003674(molecular_function);GO:0008150(biological_process);GO:0009507(chloroplast);GO:0016021(integral component of membrane)	NA	NA	NA	LOW QUALITY PROTEIN: protein GPR107-like, partial [Carica papaya]	NA	8.40168	8.92393	14.5048	80.0873	252.101	239.117	33.9005	11.6563	29.1054	1.14779e-21	3.54951e-20	yes
gene-GIB67_021299	GIB67_021299	29687	rna-gnl|WGS:JACGCM|KingUnif29430.1	GO:0004674(protein serine/threonine kinase activity);GO:0005886(plasma membrane);GO:0006468(protein phosphorylation)	NA	NA	NA	Protein kinase domain [Macleaya cordata]	NA	4.46923	2.55415	7.97762	50.6992	63.8937	81.8919	25.1817	18.6932	16.3774	1.15148e-21	3.55557e-20	yes
gene-GIB67_034720	GIB67_034720	21550	rna-gnl|WGS:JACGCM|KingUnif01386.1	GO:0005886(plasma membrane);GO:0015171(amino acid transmembrane transporter activity);GO:0032973(amino acid export across plasma membrane);GO:0043090(amino acid import);GO:0080144(amino acid homeostasis)	NA	NA	NA	WAT1-related-like protein [Cinnamomum micranthum f. kanehirae]	NA	20.156	42.0843	4.48133	0.726075	0.60593	0.122508	0.65571	0.388987	0.624936	1.1805e-21	3.63973e-20	yes
gene-GIB67_017808	GIB67_017808	20522	rna-gnl|WGS:JACGCM|KingUnif14537.1	GO:0005515(protein binding);GO:0005634(nucleus);GO:0006511(ubiquitin-dependent protein catabolic process);GO:0009723(response to ethylene);GO:0009873(ethylene-activated signaling pathway);GO:0010105(negative regulation of ethylene-activated signaling pathway);GO:0016567(protein ubiquitination);GO:0019005(SCF ubiquitin ligase complex)	04016(MAPK signaling pathway - plant);04075(Plant hormone signal transduction)	K14515	NA	PREDICTED: EIN3-binding F-box protein 1-like [Juglans regia]	NA	132.039	104.334	165.094	14.1984	10.8561	16.607	31.3091	66.5727	46.7895	1.39667e-21	4.29978e-20	yes
gene-GIB67_020320	GIB67_020320	10291	rna-gnl|WGS:JACGCM|KingUnif27753.1	GO:0000902(cell morphogenesis);GO:0003779(actin binding);GO:0005200(structural constituent of cytoskeleton);GO:0005524(ATP binding);GO:0005737(cytoplasm);GO:0005885(Arp2/3 protein complex);GO:0007015(actin filament organization);GO:0007275(multicellular organism development);GO:0009825(multidimensional cell growth);GO:0010090(trichome morphogenesis);GO:0030029(actin filament-based process);GO:003…	NA	NA	NA	actin-related protein 2 [Ziziphus jujuba]	NA	149.51	585.854	128.073	21.9625	17.6434	15.5971	30.9284	30.0774	26.6263	1.483e-21	4.55872e-20	yes
gene-GIB67_028724	GIB67_028724	13173	rna-gnl|WGS:JACGCM|KingUnif27570.1	GO:0004004(ATP-dependent RNA helicase activity);GO:0006413(translational initiation);GO:0007059(chromosome segregation);GO:0010468(regulation of gene expression);GO:0010501(RNA secondary structure unwinding);GO:0036464(cytoplasmic ribonucleoprotein granule)	NA	NA	NA	Helicase [Macleaya cordata]	NA	17.0091	16.0851	10.7061	8.74907	11.343	7.31122	52.0635	61.3452	45.0233	1.51212e-21	4.64131e-20	yes
gene-GIB67_001760	GIB67_001760	37087	rna-gnl|WGS:JACGCM|KingUnif39014.1	GO:0005515(protein binding);GO:0005524(ATP binding);GO:0005739(mitochondrion);GO:0005774(vacuolar membrane);GO:0005829(cytosol);GO:0006457(protein folding);GO:0009408(response to heat);GO:0009414(response to water deprivation);GO:0009507(chloroplast);GO:0009536(plastid);GO:0009570(chloroplast stroma);GO:0009651(response to salt stress);GO:0009704(de-etiolation);GO:0009793(embryo development endin…	04141(Protein processing in endoplasmic reticulum);04626(Plant-pathogen interaction)	K09487	NA	Heat shock protein Hsp90 family [Macleaya cordata]	NA	918.267	917	749.538	66.5613	110.977	92.9769	255.775	275.417	207.999	1.67126e-21	5.12212e-20	yes
gene-GIB67_019014	GIB67_019014	16676	rna-gnl|WGS:JACGCM|KingUnif07703.1	GO:0004069(L-aspartate:2-oxoglutarate aminotransferase activity);GO:0006520(cellular amino acid metabolic process);GO:0008483(transaminase activity);GO:0008793(aromatic-amino-acid:2-oxoglutarate aminotransferase activity);GO:0009058(biosynthetic process);GO:0009693(ethylene biosynthetic process);GO:0016847(1-aminocyclopropane-1-carboxylate synthase activity);GO:0030170(pyridoxal phosphate binding)	NA	NA	NA	hypothetical protein AQUCO_01300551v1 [Aquilegia coerulea]	NA	8.27348	7.79488	9.38545	40.2062	38.4858	41.9442	38.5951	39.6368	42.6603	1.77653e-21	5.43666e-20	yes
gene-GIB67_019160	GIB67_019160	16826	rna-gnl|WGS:JACGCM|KingUnif41783.1	GO:0009507(chloroplast);GO:0010271(regulation of chlorophyll catabolic process)	00860(Porphyrin and chlorophyll metabolism)	K22013	EC:4.99.1.10	hypothetical protein AQUCO_01300472v1 [Aquilegia coerulea]	NA	17.7909	9.71689	43.4782	861.306	366.823	642.307	112.102	79.5635	53.0932	1.8258e-21	5.57914e-20	yes
gene-GIB67_033687	GIB67_033687	2935	rna-gnl|WGS:JACGCM|KingUnif09429.1	GO:0004620(phospholipase activity);GO:0005737(cytoplasm);GO:0016020(membrane);GO:0047372(acylglycerol lipase activity)	NA	NA	NA	hypothetical protein AQUCO_01500169v1 [Aquilegia coerulea]	NA	6.13766	5.51007	9.27043	9.73526	6.72719	13.2306	48.7577	49.1214	37.2165	1.86607e-21	5.69374e-20	yes
gene-GIB67_030797	GIB67_030797	40040	rna-gnl|WGS:JACGCM|KingUnif18299.1	GO:0000398(mRNA splicing, via spliceosome);GO:0005687(U4 snRNP);GO:0005690(U4atac snRNP);GO:0071011(precatalytic spliceosome);GO:0097526(spliceosomal tri-snRNP complex)	03040(Spliceosome)	K12844	NA	Nop domain [Macleaya cordata]	NA	155.004	242.492	114.5	25.7322	12.9991	17.82	36.1607	40.8381	53.507	1.9035e-21	5.79932e-20	yes
gene-GIB67_037894	GIB67_037894	35184	rna-gnl|WGS:JACGCM|KingUnif21262.1	GO:0003677(DNA binding);GO:0005634(nucleus);GO:0005737(cytoplasm);GO:0006351(transcription, DNA-templated);GO:0006355(regulation of transcription, DNA-templated);GO:0009554(megasporogenesis);GO:0009556(microsporogenesis);GO:0030154(cell differentiation);GO:0046872(metal ion binding);GO:0048653(anther development)	04075(Plant hormone signal transduction)	K13415	EC:2.7.10.1;EC:2.7.11.1	squamosa promoter binding protein-like 3c [Platanus x hispanica]	NA	27.8649	22.4891	13.2826	1.23784	1.38704	1.59817	11.1703	12.3363	14.8616	1.91468e-21	5.82476e-20	yes
gene-GIB67_040133	GIB67_040133	18500	rna-gnl|WGS:JACGCM|KingUnif29231.1	GO:0001046(core promoter sequence-specific DNA binding);GO:0001228(transcriptional activator activity, RNA polymerase II transcription regulatory region sequence-specific DNA binding);GO:0005634(nucleus);GO:0006366(transcription by RNA polymerase II)	NA	NA	NA	hypothetical protein AQUCO_00900280v1 [Aquilegia coerulea]	NA	10.0689	7.19328	8.44209	60.4205	56.108	47.3513	28.6588	38.7669	26.8981	2.08e-21	6.31834e-20	yes
gene-GIB67_027826	GIB67_027826	22640	rna-gnl|WGS:JACGCM|KingUnif23827.1	GO:0003674(molecular_function);GO:0005886(plasma membrane);GO:0008150(biological_process);GO:0016021(integral component of membrane)	NA	NA	NA	PREDICTED: late embryogenesis abundant protein At1g64065-like [Nelumbo nucifera]	NA	6.73613	5.8641	9.12512	52.6654	34.6583	38.7439	11.6947	11.9475	9.2242	2.2564e-21	6.84408e-20	yes
gene-GIB67_037289	GIB67_037289	19569	rna-gnl|WGS:JACGCM|KingUnif32147.1	GO:0005249(voltage-gated potassium channel activity);GO:0005634(nucleus);GO:0006813(potassium ion transport);GO:0008076(voltage-gated potassium channel complex);GO:0016020(membrane);GO:0016567(protein ubiquitination);GO:0051260(protein homooligomerization)	NA	NA	NA	BTB/POZ-like [Macleaya cordata]	NA	16.551	20.9082	52.2163	505.976	338.441	638.718	46.7948	100.172	72.2821	2.67069e-21	8.08877e-20	yes
gene-GIB67_035416	GIB67_035416	4253	rna-gnl|WGS:JACGCM|KingUnif16260.1	GO:0005515(protein binding);GO:0005524(ATP binding);GO:0005634(nucleus);GO:0005737(cytoplasm);GO:0005829(cytosol);GO:0005886(plasma membrane);GO:0006457(protein folding);GO:0009408(response to heat);GO:0046686(response to cadmium ion)	NA	NA	NA	Heat shock protein 70 family [Macleaya cordata]	NA	906.227	1292.08	801.452	80.9565	93.289	87.1406	213.239	299.132	136.424	2.7216e-21	8.23085e-20	yes
gene-GIB67_003854	GIB67_003854	5030	rna-gnl|WGS:JACGCM|KingUnif16941.1	GO:0030599(pectinesterase activity);GO:0046910(pectinesterase inhibitor activity);GO:0071944(cell periphery)	04016(MAPK signaling pathway - plant);04626(Plant-pathogen interaction)	K13447	EC:1.6.3.-;EC:1.11.1.-	uncharacterized protein LOC113351420 [Papaver somniferum]	NA	0.176611	0.102555	0.105166	2.71616	1.31128	1.62995	3.3217	5.51864	4.36295	2.75499e-21	8.31957e-20	yes
gene-GIB67_003555	GIB67_003555	23818	rna-gnl|WGS:JACGCM|KingUnif03219.1	GO:0003674(molecular_function);GO:0005575(cellular_component);GO:0008150(biological_process)	04141(Protein processing in endoplasmic reticulum);04120(Ubiquitin mediated proteolysis);03420(Nucleotide excision repair)	K03868	EC:2.3.2.32	GRAM domain [Macleaya cordata]	NA	1.24564	0.603286	1.15867	16.4295	66.9708	55.3858	14.6907	15.6888	5.44607	3.064e-21	9.23916e-20	yes
gene-GIB67_025171	GIB67_025171	14013	rna-gnl|WGS:JACGCM|KingUnif19256.1	NA	NA	NA	NA	PREDICTED: sigma factor binding protein 1, chloroplastic-like [Nelumbo nucifera]	NA	9.56307	16.413	21.4686	129.589	121.01	155.049	42.2765	49.6868	56.5984	3.20253e-21	9.64276e-20	yes
gene-GIB67_001173	GIB67_001173	35514	rna-gnl|WGS:JACGCM|KingUnif06947.1	GO:0005887(integral component of plasma membrane);GO:0009705(plant-type vacuole membrane);GO:0009992(cellular water homeostasis);GO:0015250(water channel activity);GO:0015254(glycerol channel activity);GO:0034220(ion transmembrane transport);GO:0042807(central vacuole)	NA	NA	NA	Major intrinsic protein [Macleaya cordata]	NA	7.26719	1.52632	3.50552	116.025	180.137	185.6	10.0801	1.4828	1.41269	3.39525e-21	1.02081e-19	yes
gene-GIB67_017833	GIB67_017833	33348	rna-gnl|WGS:JACGCM|KingUnif35366.1	GO:0004620(phospholipase activity);GO:0005737(cytoplasm);GO:0016020(membrane);GO:0047372(acylglycerol lipase activity)	NA	NA	NA	hypothetical protein AQUCO_01500169v1 [Aquilegia coerulea]	NA	6.32798	7.32623	9.67713	14.9605	6.6628	13.6495	49.5226	50.528	57.7256	3.50814e-21	1.05321e-19	yes
gene-GIB67_019592	GIB67_019592	16599	rna-gnl|WGS:JACGCM|KingUnif20791.1	GO:0003674(molecular_function);GO:0005634(nucleus);GO:0008150(biological_process)	NA	NA	NA	PREDICTED: hemiasterlin resistant protein 1 [Juglans regia]	NA	1530.74	2756.94	1723.16	272.893	282.31	236.985	470.329	460.19	308.411	3.52367e-21	1.05633e-19	yes
gene-GIB67_005999	GIB67_005999	24953	rna-gnl|WGS:JACGCM|KingUnif27897.1	GO:0009813(flavonoid biosynthetic process);GO:0043231(intracellular membrane-bounded organelle);GO:0052696(flavonoid glucuronidation);GO:0080043(quercetin 3-O-glucosyltransferase activity);GO:0080044(quercetin 7-O-glucosyltransferase activity)	NA	NA	NA	PREDICTED: UDP-glycosyltransferase 91C1-like [Nelumbo nucifera]	NA	0.424494	0.230385	0.172277	0.805876	1.0761	0.488909	6.6614	7.1265	7.07142	3.71293e-21	1.11145e-19	yes
gene-GIB67_037356	GIB67_037356	6114	rna-gnl|WGS:JACGCM|KingUnif12193.1	GO:0005634(nucleus);GO:0005737(cytoplasm)	NA	NA	NA	PREDICTED: U-box domain-containing protein 4-like [Nelumbo nucifera]	NA	3.97007	2.04658	4.33015	24.1536	31.7313	33.4269	3.40746	5.58645	4.92788	3.73093e-21	1.11521e-19	yes
gene-GIB67_037600	GIB67_037600	31597	rna-gnl|WGS:JACGCM|KingUnif30764.1	GO:0035251(UDP-glucosyltransferase activity)	NA	NA	NA	UDP-glucuronosyl/UDP-glucosyltransferase [Macleaya cordata]	NA	0.044947	0.069629	0.131061	0.024701	0.068078	0.229971	8.76401	3.23456	3.46524	3.89222e-21	1.16174e-19	yes
gene-GIB67_028331	GIB67_028331	22696	rna-gnl|WGS:JACGCM|KingUnif13746.1	NA	NA	NA	NA	uncharacterized protein LOC107480422 isoform X2 [Arachis duranensis]	NA	0	0	0	0.205681	0	0	15.3053	2.68643	37.5126	4.07574e-21	1.21475e-19	yes
gene-GIB67_012021	GIB67_012021	29017	rna-gnl|WGS:JACGCM|KingUnif29268.1	GO:0003723(RNA binding);GO:0003735(structural constituent of ribosome);GO:0006412(translation);GO:0022625(cytosolic large ribosomal subunit);GO:0042254(ribosome biogenesis)	NA	NA	NA	hypothetical protein AQUCO_00200591v1 [Aquilegia coerulea]	NA	3.1045	5.69736	4.50355	25.9452	23.8551	20.3378	5.57747	5.78239	5.14594	4.11722e-21	1.22533e-19	yes
gene-GIB67_014615	GIB67_014615	6123	rna-gnl|WGS:JACGCM|KingUnif07694.1	GO:0005576(extracellular region);GO:0016021(integral component of membrane);GO:0016301(kinase activity);GO:0016310(phosphorylation)	NA	NA	NA	PREDICTED: uncharacterized protein At1g24485 [Nelumbo nucifera]	NA	0.716989	0.102566	0.716234	17.078	26.1996	32.1624	6.35625	10.4143	4.39205	4.13046e-21	1.2275e-19	yes
gene-GIB67_038266	GIB67_038266	19381	rna-gnl|WGS:JACGCM|KingUnif10915.1	GO:0000103(sulfate assimilation);GO:0005737(cytoplasm);GO:0005829(cytosol);GO:0006535(cysteine biosynthetic process from serine);GO:0009001(serine O-acetyltransferase activity);GO:0016407(acetyltransferase activity);GO:0019344(cysteine biosynthetic process)	00920(Sulfur metabolism);00270(Cysteine and methionine metabolism)	K00640	EC:2.3.1.30	hypothetical protein AQUCO_01500394v1 [Aquilegia coerulea]	NA	1.12609	1.13022	0.927845	11.6831	12.3587	10.8271	2.91515	2.42128	1.88417	4.69943e-21	1.39457e-19	yes
gene-GIB67_039263	GIB67_039263	21334	rna-gnl|WGS:JACGCM|KingUnif43153.1	GO:0003674(molecular_function);GO:0008150(biological_process);GO:0016021(integral component of membrane)	NA	NA	NA	Protein of unknown function DUF599 [Macleaya cordata]	NA	1.18606	1.60003	0.847258	3.20773	2.04814	3.2056	20.7235	51.6831	11.5806	4.77456e-21	1.41482e-19	yes
gene-GIB67_006981	GIB67_006981	4645	rna-gnl|WGS:JACGCM|KingUnif14434.1	GO:0004568(chitinase activity);GO:0006040(amino sugar metabolic process);GO:0008061(chitin binding);GO:0008843(endochitinase activity);GO:0016231(beta-N-acetylglucosaminidase activity);GO:0050832(defense response to fungus)	00520(Amino sugar and nucleotide sugar metabolism);04016(MAPK signaling pathway - plant)	K20547	EC:3.2.1.14	PREDICTED: LOW QUALITY PROTEIN: basic endochitinase [Vitis vinifera]	NA	39.5481	27.8312	45.8526	18.8621	18.5848	12.4569	183.16	103.836	100.62	5.03466e-21	1.48975e-19	yes
gene-GIB67_031047	GIB67_031047	10961	rna-gnl|WGS:JACGCM|KingUnif01501.1	GO:0005515(protein binding);GO:0005737(cytoplasm);GO:0005829(cytosol);GO:0006559(L-phenylalanine catabolic process);GO:0006952(defense response);GO:0006979(response to oxidative stress);GO:0009611(response to wounding);GO:0009699(phenylpropanoid biosynthetic process);GO:0009800(cinnamic acid biosynthetic process);GO:0045548(phenylalanine ammonia-lyase activity);GO:0080167(response to karrikin)	00360(Phenylalanine metabolism);00940(Phenylpropanoid biosynthesis)	K10775	EC:4.3.1.24	Aromatic amino acid lyase [Macleaya cordata]	NA	0.272756	0.209226	0.989526	23.1949	27.2626	81.4442	8.71037	14.1616	4.32308	5.07257e-21	1.49881e-19	yes
gene-GIB67_039058	GIB67_039058	33907	rna-gnl|WGS:JACGCM|KingUnif10808.1	GO:0005575(cellular_component);GO:0006979(response to oxidative stress);GO:0016740(transferase activity)	NA	NA	NA	uncharacterized protein LOC112020187 [Quercus suber]	NA	21.8091	52.67	69.9242	592.455	477.86	696.075	236.852	205.677	177.656	5.67375e-21	1.67404e-19	yes
gene-GIB67_037188	GIB67_037188	19468	rna-gnl|WGS:JACGCM|KingUnif31542.1	GO:0003677(DNA binding);GO:0003700(DNA binding transcription factor activity);GO:0005634(nucleus);GO:0006351(transcription, DNA-templated);GO:0006355(regulation of transcription, DNA-templated);GO:0009651(response to salt stress);GO:0009723(response to ethylene);GO:0009737(response to abscisic acid);GO:0009739(response to gibberellin);GO:0009751(response to salicylic acid);GO:0009753(response to …	04712(Circadian rhythm - plant)	K12133	NA	SANT/Myb domain [Macleaya cordata]	NA	8.37094	8.7063	6.15088	47.0094	42.3116	41.4706	13.3486	18.074	13.5083	7.78797e-21	2.29455e-19	yes
gene-GIB67_013394	GIB67_013394	32135	rna-gnl|WGS:JACGCM|KingUnif19625.1	GO:0005524(ATP binding);GO:0005618(cell wall);GO:0005739(mitochondrion);GO:0006457(protein folding);GO:0009507(chloroplast);GO:0009570(chloroplast stroma)	04141(Protein processing in endoplasmic reticulum);04626(Plant-pathogen interaction)	K09487	NA	Heat shock protein Hsp90 family [Macleaya cordata]	NA	149.802	144.896	128.628	19.7379	25.1558	19.0637	73.0537	78.2074	55.708	7.80313e-21	2.29573e-19	yes
gene-GIB67_024745	GIB67_024745	13292	rna-gnl|WGS:JACGCM|KingUnif02591.1	GO:0004674(protein serine/threonine kinase activity);GO:0005886(plasma membrane);GO:0007166(cell surface receptor signaling pathway)	NA	NA	NA	putative wall-associated receptor kinase-like 16 isoform X2 [Olea europaea var. sylvestris]	NA	0.251276	0.268563	0.678422	10.8789	12.6169	12.7507	2.26213	1.39774	1.90108	8.02452e-21	2.35749e-19	yes
gene-GIB67_030347	GIB67_030347	26691	rna-gnl|WGS:JACGCM|KingUnif11484.1	GO:0005634(nucleus);GO:0005635(nuclear envelope);GO:0005875(microtubule associated complex);GO:0008017(microtubule binding);GO:0008150(biological_process);GO:0009524(phragmoplast);GO:0072686(mitotic spindle)	NA	NA	NA	hypothetical protein BVC80_1751g76 [Macleaya cordata]	NA	1.82865	1.3129	1.96272	12.663	14.6339	14.9063	2.27353	4.59507	3.2911	8.27534e-21	2.42771e-19	yes
gene-GIB67_000140	GIB67_000140	1055	rna-gnl|WGS:JACGCM|KingUnif03580.1	GO:0004674(protein serine/threonine kinase activity);GO:0005515(protein binding);GO:0005524(ATP binding);GO:0005622(intracellular);GO:0005886(plasma membrane);GO:0016301(kinase activity);GO:0018105(peptidyl-serine phosphorylation);GO:0018107(peptidyl-threonine phosphorylation);GO:0035556(intracellular signal transduction)	NA	NA	NA	CBL-interacting serine/threonine-protein kinase 12-like [Carica papaya]	NA	11.8377	7.65903	13.2151	91.4367	55.2428	79.8795	26.968	29.0238	30.0754	8.87311e-21	2.59937e-19	yes
gene-GIB67_009688	GIB67_009688	37306	rna-gnl|WGS:JACGCM|KingUnif15513.1	GO:0004722(protein serine/threonine phosphatase activity);GO:0005543(phospholipid binding);GO:0005634(nucleus);GO:0005886(plasma membrane);GO:0006355(regulation of transcription, DNA-templated);GO:0006470(protein dephosphorylation);GO:0007275(multicellular organism development);GO:0009934(regulation of meristem structural organization);GO:0010074(maintenance of meristem identity);GO:0046872(metal…	NA	NA	NA	hypothetical protein AQUCO_02400078v1 [Aquilegia coerulea]	NA	1.50151	2.86244	0.966499	0	0	0	6.78172	2.4981	8.09667	9.31466e-21	2.72484e-19	yes
gene-GIB67_029018	GIB67_029018	14358	rna-gnl|WGS:JACGCM|KingUnif30413.1	GO:0004674(protein serine/threonine kinase activity);GO:0005829(cytosol);GO:0006468(protein phosphorylation);GO:0035556(intracellular signal transduction)	NA	NA	NA	Protein kinase domain [Macleaya cordata]	NA	1.9315	2.23055	1.37708	24.4254	14.4824	18.0515	13.3144	15.1448	11.874	9.53345e-21	2.78488e-19	yes
gene-GIB67_013234	GIB67_013234	6908	rna-gnl|WGS:JACGCM|KingUnif33845.1	GO:0001046(core promoter sequence-specific DNA binding);GO:0001228(transcriptional activator activity, RNA polymerase II transcription regulatory region sequence-specific DNA binding);GO:0005634(nucleus);GO:0006366(transcription by RNA polymerase II)	04075(Plant hormone signal transduction);04712(Circadian rhythm - plant)	K12126	NA	PREDICTED: transcription factor bHLH68-like isoform X1 [Nelumbo nucifera]	NA	2.18979	1.52724	1.04718	23.73	19.1088	14.0308	2.82528	2.90242	4.9548	9.58613e-21	2.7963e-19	yes
gene-GIB67_031340	GIB67_031340	23101	rna-gnl|WGS:JACGCM|KingUnif42716.1	GO:0009416(response to light stimulus);GO:0009535(chloroplast thylakoid membrane);GO:0009768(photosynthesis, light harvesting in photosystem I);GO:0009941(chloroplast envelope);GO:0010287(plastoglobule);GO:0016168(chlorophyll binding);GO:0031409(pigment binding)	00196(Photosynthesis - antenna proteins)	K08917	NA	Chlorophyll A-B binding protein [Macleaya cordata]	NA	778.141	622.72	1173.25	41.0837	105.605	49.7936	213.435	244.987	240.316	1.05936e-20	3.0858e-19	yes
gene-GIB67_043087	GIB67_043087	12258	rna-gnl|WGS:JACGCM|KingUnif37872.1	GO:0005515(protein binding);GO:0005737(cytoplasm);GO:0006559(L-phenylalanine catabolic process);GO:0009800(cinnamic acid biosynthetic process);GO:0045548(phenylalanine ammonia-lyase activity)	00360(Phenylalanine metabolism);00940(Phenylpropanoid biosynthesis)	K10775	EC:4.3.1.24	hypothetical protein TSUD_337780 [Trifolium subterraneum]	NA	0.242044	0.082892	0.526105	17.405	17.9406	58.5007	5.09345	9.61984	2.34999	1.14725e-20	3.33708e-19	yes
gene-GIB67_032405	GIB67_032405	22413	rna-gnl|WGS:JACGCM|KingUnif00100.1	GO:0000981(RNA polymerase II transcription factor activity, sequence-specific DNA binding);GO:0001135(transcription factor activity, RNA polymerase II transcription factor recruiting);GO:0003677(DNA binding);GO:0003700(DNA binding transcription factor activity);GO:0005634(nucleus);GO:0006351(transcription, DNA-templated);GO:0006355(regulation of transcription, DNA-templated);GO:0006357(regulation…	NA	NA	NA	PREDICTED: myb-related protein Myb4 [Nelumbo nucifera]	NA	1.17495	0.966203	3.88597	47.2274	46.1453	65.2899	17.8915	14.2562	7.33371	1.29792e-20	3.77002e-19	yes
gene-GIB67_028650	GIB67_028650	41455	rna-gnl|WGS:JACGCM|KingUnif08253.1	NA	NA	NA	NA	uncharacterized protein LOC105179654 [Sesamum indicum]	NA	1.53086	2.92381	1.70006	0.049015	0.076674	0.036353	1.15231	1.10284	1.36336	1.30834e-20	3.79494e-19	yes
gene-GIB67_040793	GIB67_040793	2851	rna-gnl|WGS:JACGCM|KingUnif29545.1	GO:0003674(molecular_function);GO:0005634(nucleus);GO:0008150(biological_process)	NA	NA	NA	PREDICTED: uncharacterized protein LOC104600482 isoform X1 [Nelumbo nucifera]	NA	0.208536	0.023856	0.242378	8.52758	11.0124	29.6858	4.67761	5.34265	2.00871	1.31794e-20	3.81738e-19	yes
gene-GIB67_009830	GIB67_009830	33308	rna-gnl|WGS:JACGCM|KingUnif08688.1	GO:0004497(monooxygenase activity);GO:0007275(multicellular organism development);GO:0010268(brassinosteroid homeostasis);GO:0016125(sterol metabolic process);GO:0016132(brassinosteroid biosynthetic process)	NA	NA	NA	beta-amyrin 28-oxidase [Herrania umbratica]	NA	10.8716	6.31283	10.8499	4.72437	5.11514	4.71507	29.7409	62.9038	214.035	1.34811e-20	3.89929e-19	yes
gene-GIB67_007173	GIB67_007173	21522	rna-gnl|WGS:JACGCM|KingUnif13229.1	GO:0005215(transporter activity);GO:0005509(calcium ion binding);GO:0005886(plasma membrane);GO:0009624(response to nematode);GO:0010119(regulation of stomatal movement);GO:0015293(symporter activity);GO:0015333(peptide:proton symporter activity);GO:0016020(membrane);GO:0016021(integral component of membrane);GO:0042128(nitrate assimilation);GO:0055085(transmembrane transport);GO:0080168(abscisic…	NA	NA	NA	Proton-dependent oligopeptide transporter family [Macleaya cordata]	NA	4.31946	4.12298	3.72115	6.57196	11.4916	5.55492	26.0097	36.962	24.2848	1.47191e-20	4.25138e-19	yes
gene-GIB67_034334	GIB67_034334	7323	rna-gnl|WGS:JACGCM|KingUnif40668.1	GO:0000266(mitochondrial fission);GO:0003924(GTPase activity);GO:0005515(protein binding);GO:0005525(GTP binding);GO:0005739(mitochondrion);GO:0005777(peroxisome);GO:0005829(cytosol);GO:0005886(plasma membrane);GO:0007031(peroxisome organization);GO:0007049(cell cycle);GO:0007165(signal transduction);GO:0008017(microtubule binding);GO:0009791(post-embryonic development);GO:0016021(integral compon…	NA	NA	NA	PREDICTED: dynamin-related protein 3A-like [Nelumbo nucifera]	NA	4.17585	6.86538	1.37105	0	0	0	0	0	0	1.49673e-20	4.31702e-19	yes
gene-GIB67_031044	GIB67_031044	10955	rna-gnl|WGS:JACGCM|KingUnif35743.1	GO:0005515(protein binding);GO:0005737(cytoplasm);GO:0005829(cytosol);GO:0006559(L-phenylalanine catabolic process);GO:0006952(defense response);GO:0006979(response to oxidative stress);GO:0009611(response to wounding);GO:0009699(phenylpropanoid biosynthetic process);GO:0009800(cinnamic acid biosynthetic process);GO:0045548(phenylalanine ammonia-lyase activity);GO:0080167(response to karrikin)	00360(Phenylalanine metabolism);00940(Phenylpropanoid biosynthesis)	K10775	EC:4.3.1.24	Aromatic amino acid lyase [Macleaya cordata]	NA	0.610046	0.605095	1.67555	11.0584	15.4531	32.2835	18.2037	26.5132	18.1139	1.50985e-20	4.34874e-19	yes
gene-GIB67_006506	GIB67_006506	36065	rna-gnl|WGS:JACGCM|KingUnif37324.1	GO:0005215(transporter activity);GO:0006810(transport);GO:0016020(membrane);GO:0016021(integral component of membrane);GO:0031969(chloroplast membrane)	NA	NA	NA	PREDICTED: probable folate-biopterin transporter 8, chloroplastic isoform X1 [Nelumbo nucifera]	NA	9.09705	14.2173	6.10708	0.107825	0.250984	0.253591	1.39019	2.6303	0.766672	1.64619e-20	4.73481e-19	yes
gene-GIB67_025204	GIB67_025204	14048	rna-gnl|WGS:JACGCM|KingUnif19005.1	GO:0004674(protein serine/threonine kinase activity);GO:0005634(nucleus);GO:0046777(protein autophosphorylation)	NA	NA	NA	PREDICTED: uncharacterized protein LOC104612242 [Nelumbo nucifera]	NA	19.4404	12.9003	20.1023	108.143	89.1059	106.187	34.8002	46.5666	37.7921	1.67627e-20	4.8146e-19	yes
gene-GIB67_036031	GIB67_036031	16443	rna-gnl|WGS:JACGCM|KingUnif41600.1	GO:0005777(peroxisome);GO:0006631(fatty acid metabolic process);GO:0016874(ligase activity)	NA	NA	NA	PREDICTED: probable acyl-activating enzyme 5, peroxisomal [Nelumbo nucifera]	NA	9.81483	8.20508	9.88603	58.5524	42.9746	51.7442	54.0534	45.487	42.7913	1.71599e-20	4.92179e-19	yes
gene-GIB67_004826	GIB67_004826	32988	rna-gnl|WGS:JACGCM|KingUnif05307.1	NA	NA	NA	NA		NA	3.9366	6.21353	3.45448	0	0	0	13.2799	4.08633	19.0409	1.77692e-20	5.08947e-19	yes
gene-GIB67_038323	GIB67_038323	43154	rna-gnl|WGS:JACGCM|KingUnif19720.1	GO:0005524(ATP binding);GO:0005886(plasma membrane);GO:0009651(response to salt stress);GO:0016887(ATPase activity)	NA	NA	NA	PREDICTED: protein HYPER-SENSITIVITY-RELATED 4-like [Nelumbo nucifera]	NA	1.04202	1.18746	1.6663	9.57845	22.0816	21.2476	1.72126	1.16531	2.89013	1.89932e-20	5.43246e-19	yes
gene-GIB67_018042	GIB67_018042	5653	rna-gnl|WGS:JACGCM|KingUnif01864.1	GO:0005887(integral component of plasma membrane);GO:0009705(plant-type vacuole membrane);GO:0009992(cellular water homeostasis);GO:0015250(water channel activity);GO:0015254(glycerol channel activity);GO:0034220(ion transmembrane transport);GO:0042807(central vacuole)	NA	NA	NA	Major intrinsic protein [Macleaya cordata]	NA	637.73	278.453	578.652	43.9133	49.7223	24.8498	95.7831	70.6049	29.8644	1.91225e-20	5.46186e-19	yes
gene-GIB67_034550	GIB67_034550	625	rna-gnl|WGS:JACGCM|KingUnif12246.1	GO:0003676(nucleic acid binding);GO:0003677(DNA binding);GO:0003729(mRNA binding);GO:0005634(nucleus);GO:0008150(biological_process);GO:0046872(metal ion binding)	00400(Phenylalanine, tyrosine and tryptophan biosynthesis)	K13832	EC:4.2.1.10;EC:1.1.1.25	PREDICTED: zinc finger CCCH domain-containing protein 34 isoform X1 [Vitis vinifera]	NA	40.0024	56.9355	21.8075	6.25029	5.89098	6.66183	7.62883	9.8648	8.50234	1.93179e-20	5.51003e-19	yes
gene-GIB67_027895	GIB67_027895	35404	rna-gnl|WGS:JACGCM|KingUnif38148.1	GO:0005773(vacuole);GO:0005783(endoplasmic reticulum);GO:0005789(endoplasmic reticulum membrane);GO:0005886(plasma membrane);GO:0006508(proteolysis);GO:0007275(multicellular organism development);GO:0008237(metallopeptidase activity);GO:0010073(meristem maintenance);GO:0016021(integral component of membrane);GO:0016805(dipeptidase activity);GO:0040008(regulation of growth);GO:0046872(metal ion bi…	NA	NA	NA	Protease-associated domain [Macleaya cordata]	NA	10.742	9.73461	9.96362	9.94315	8.48387	5.91526	46.9259	32.6932	35.323	1.95296e-20	5.56268e-19	yes
gene-GIB67_008716	GIB67_008716	10900	rna-gnl|WGS:JACGCM|KingUnif12778.1	GO:0003674(molecular_function);GO:0008150(biological_process)	03040(Spliceosome)	K12854	EC:3.6.4.13	Protein of unknown function DUF761 [Macleaya cordata]	NA	1.83065	2.37426	1.85715	17.5224	17.1997	13.7473	5.96143	3.9589	8.25419	2.03957e-20	5.80135e-19	yes
gene-GIB67_025302	GIB67_025302	12669	rna-gnl|WGS:JACGCM|KingUnif42254.1	GO:0005887(integral component of plasma membrane);GO:0009705(plant-type vacuole membrane);GO:0009992(cellular water homeostasis);GO:0015250(water channel activity);GO:0015254(glycerol channel activity);GO:0034220(ion transmembrane transport);GO:0042807(central vacuole)	NA	NA	NA	Major intrinsic protein [Macleaya cordata]	NA	69.0353	40.9194	18.4974	4.06519	2.77543	3.4668	9.53584	4.55766	7.24734	2.06299e-20	5.85986e-19	yes
gene-GIB67_003110	GIB67_003110	14603	rna-gnl|WGS:JACGCM|KingUnif26436.1	GO:0005516(calmodulin binding);GO:0005634(nucleus);GO:0005886(plasma membrane);GO:0008150(biological_process)	NA	NA	NA	Protein of unknown function DUF1645 [Macleaya cordata]	NA	16.5199	20.7378	20.554	118.156	85.6092	123.401	38.2471	46.8469	49.5513	2.14103e-20	6.07313e-19	yes
gene-GIB67_018614	GIB67_018614	38344	rna-gnl|WGS:JACGCM|KingUnif01174.1	NA	NA	NA	NA		NA	6.41657	9.50815	9.44769	7.03852	6.17401	4.51941	36.205	40.536	64.2595	2.16579e-20	6.13492e-19	yes
gene-GIB67_039592	GIB67_039592	2162	rna-gnl|WGS:JACGCM|KingUnif14642.1	GO:0005515(protein binding)	NA	NA	NA	Proteinase inhibitor I13 [Macleaya cordata]	NA	0	0.267668	0.165721	6.55881	9.97322	12.6213	14.2573	24.4728	14.015	2.17087e-20	6.14085e-19	yes
gene-GIB67_033684	GIB67_033684	2938	rna-gnl|WGS:JACGCM|KingUnif34951.1	GO:0009813(flavonoid biosynthetic process);GO:0043231(intracellular membrane-bounded organelle);GO:0052696(flavonoid glucuronidation);GO:0080043(quercetin 3-O-glucosyltransferase activity);GO:0080044(quercetin 7-O-glucosyltransferase activity)	NA	NA	NA	LOW QUALITY PROTEIN: cinnamate beta-D-glucosyltransferase [Cinnamomum micranthum f. kanehirae]	NA	2.36359	1.76927	2.33067	13.0265	38.3842	39.1625	17.2757	19.4249	18.7267	2.28723e-20	6.4611e-19	yes
gene-GIB67_031627	GIB67_031627	29572	rna-gnl|WGS:JACGCM|KingUnif05419.1	GO:0005886(plasma membrane);GO:0016324(apical plasma membrane);GO:0051819(induction by symbiont of nodulation, tumor or growth in host)	NA	NA	NA	PREDICTED: flotillin-like protein 4 [Populus euphratica]	NA	5.31012	6.96383	7.66864	57.6486	43.2749	30.794	48.7963	36.7557	52.7098	2.33916e-20	6.59009e-19	yes
gene-GIB67_026221	GIB67_026221	37748	rna-gnl|WGS:JACGCM|KingUnif23164.1	GO:0005215(transporter activity);GO:0005634(nucleus);GO:0005829(cytosol);GO:0005886(plasma membrane);GO:0006810(transport);GO:0007049(cell cycle);GO:0008289(lipid binding);GO:0051301(cell division)	NA	NA	NA	patellin-3-like [Cynara cardunculus var. scolymus]	NA	44.5972	25.5575	47.1484	367.81	327.835	354.01	126.034	147.568	167.49	2.3393e-20	6.59009e-19	yes
gene-GIB67_013393	GIB67_013393	32133	rna-gnl|WGS:JACGCM|KingUnif11200.1	GO:0004674(protein serine/threonine kinase activity);GO:0005515(protein binding);GO:0005524(ATP binding);GO:0005634(nucleus);GO:0005886(plasma membrane);GO:0006468(protein phosphorylation);GO:0009506(plasmodesma);GO:0009755(hormone-mediated signaling pathway);GO:0010183(pollen tube guidance);GO:0016020(membrane);GO:0016021(integral component of membrane);GO:0016301(kinase activity);GO:0090406(pol…	NA	NA	NA	putative leucine-rich repeat receptor-like protein kinase [Cinnamomum micranthum f. kanehirae]	NA	0	0	0.023896	3.39801	1.11377	2.13336	1.41816	1.0772	0.598881	2.39868e-20	6.74813e-19	yes
gene-GIB67_006252	GIB67_006252	2553	rna-gnl|WGS:JACGCM|KingUnif22312.1	GO:0005634(nucleus);GO:0006355(regulation of transcription, DNA-templated);GO:0044212(transcription regulatory region DNA binding)	04933(AGE-RAGE signaling pathway in diabetic complications)	K06236	NA	SANT/Myb domain [Macleaya cordata]	NA	0.930734	1.38446	1.86146	17.4567	13.9615	45.9318	5.40473	3.28318	3.55249	2.44735e-20	6.87565e-19	yes
gene-GIB67_004824	GIB67_004824	32987	rna-gnl|WGS:JACGCM|KingUnif24288.1	GO:0005737(cytoplasm);GO:0008150(biological_process)	NA	NA	NA	helicase sen1 [Morus notabilis]	NA	4.78181	8.5992	2.84354	0	0	0	16.0433	5.31449	19.239	2.51446e-20	7.05456e-19	yes
gene-GIB67_030094	GIB67_030094	40354	rna-gnl|WGS:JACGCM|KingUnif14313.1	GO:0005634(nucleus)	04016(MAPK signaling pathway - plant);04075(Plant hormone signal transduction)	K13422	NA	hypothetical protein AQUCO_08100012v1 [Aquilegia coerulea]	NA	5.21732	5.27989	5.69891	31.6318	26.4732	28.8528	23.3569	25.2452	21.6144	2.56252e-20	7.17959e-19	yes
gene-GIB67_017384	GIB67_017384	27375	rna-gnl|WGS:JACGCM|KingUnif27443.1	GO:0019139(cytokinin dehydrogenase activity)	00908(Zeatin biosynthesis)	K00279	EC:1.5.99.12	hypothetical protein AQUCO_00700318v1 [Aquilegia coerulea]	NA	3.35411	3.13188	8.81276	106.241	87.243	164.647	186.778	79.9678	72.1516	2.6259e-20	7.34717e-19	yes
gene-GIB67_002042	GIB67_002042	42257	rna-gnl|WGS:JACGCM|KingUnif05044.1	GO:0005886(plasma membrane);GO:0006952(defense response)	NA	NA	NA	hypothetical protein AQUCO_02700062v1 [Aquilegia coerulea]	NA	1.43712	1.80963	1.9097	16.8046	14.8967	17.4925	7.59145	3.80868	5.35806	2.76295e-20	7.72011e-19	yes
gene-GIB67_031046	GIB67_031046	10962	rna-gnl|WGS:JACGCM|KingUnif27893.1	GO:0005515(protein binding);GO:0005737(cytoplasm);GO:0005829(cytosol);GO:0006559(L-phenylalanine catabolic process);GO:0006952(defense response);GO:0006979(response to oxidative stress);GO:0009611(response to wounding);GO:0009699(phenylpropanoid biosynthetic process);GO:0009800(cinnamic acid biosynthetic process);GO:0045548(phenylalanine ammonia-lyase activity);GO:0080167(response to karrikin)	00360(Phenylalanine metabolism);00940(Phenylpropanoid biosynthesis)	K10775	EC:4.3.1.24	Aromatic amino acid lyase [Macleaya cordata]	NA	0.242605	0.137861	0.61111	14.1207	13.5456	48.2455	2.67606	5.60973	1.34641	2.79214e-20	7.79109e-19	yes
gene-GIB67_011172	GIB67_011172	12393	rna-gnl|WGS:JACGCM|KingUnif08661.1	GO:0004674(protein serine/threonine kinase activity);GO:0005524(ATP binding);GO:0005886(plasma membrane);GO:0006468(protein phosphorylation);GO:0007169(transmembrane receptor protein tyrosine kinase signaling pathway);GO:0009507(chloroplast);GO:0009755(hormone-mediated signaling pathway);GO:0016301(kinase activity)	NA	NA	NA	PREDICTED: probable LRR receptor-like serine/threonine-protein kinase At1g06840 isoform X1 [Theobroma cacao]	NA	16.3182	17.2267	16.9744	0.991072	1.08322	1.19874	3.4625	9.12817	5.37437	2.87068e-20	7.99938e-19	yes
gene-GIB67_035871	GIB67_035871	1726	rna-gnl|WGS:JACGCM|KingUnif05490.1	GO:0004439(phosphatidylinositol-4,5-bisphosphate 5-phosphatase activity);GO:0005634(nucleus);GO:0005774(vacuolar membrane);GO:0007033(vacuole organization);GO:0036092(phosphatidylinositol-3-phosphate biosynthetic process);GO:0042578(phosphoric ester hydrolase activity)	00562(Inositol phosphate metabolism);04070(Phosphatidylinositol signaling system)	K21797	EC:3.1.3.-	hypothetical protein AQUCO_07600013v1 [Aquilegia coerulea]	NA	2.32869	2.11261	2.94044	13.8056	19.1316	21.5991	8.06819	7.41441	5.74946	2.98633e-20	8.3104e-19	yes
gene-GIB67_042248	GIB67_042248	36308	rna-gnl|WGS:JACGCM|KingUnif04931.1	GO:0004672(protein kinase activity);GO:0004693(cyclin-dependent protein serine/threonine kinase activity);GO:0005524(ATP binding);GO:0005634(nucleus);GO:0006468(protein phosphorylation);GO:0007346(regulation of mitotic cell cycle);GO:0009507(chloroplast);GO:0010468(regulation of gene expression);GO:0016301(kinase activity)	NA	NA	NA	Protein kinase domain [Macleaya cordata]	NA	9.44767	11.5634	9.01875	58.8622	40.6498	60.0424	20.2047	15.767	17.2812	3.08147e-20	8.56358e-19	yes
gene-GIB67_033446	GIB67_033446	31205	rna-gnl|WGS:JACGCM|KingUnif13901.1	GO:0004089(carbonate dehydratase activity);GO:0005886(plasma membrane);GO:0008270(zinc ion binding);GO:0009409(response to cold);GO:0009507(chloroplast);GO:0009535(chloroplast thylakoid membrane);GO:0009570(chloroplast stroma);GO:0009579(thylakoid);GO:0009817(defense response to fungus, incompatible interaction);GO:0009941(chloroplast envelope);GO:0010037(response to carbon dioxide);GO:0010119(re…	00910(Nitrogen metabolism)	K01673	EC:4.2.1.1	PREDICTED: carbonic anhydrase, chloroplastic-like [Erythranthe guttata]	NA	23.9664	20.3292	30.4991	0.785625	3.45246	1.80364	52.9769	45.2447	26.6415	3.2608e-20	9.0497e-19	yes
gene-GIB67_017394	GIB67_017394	27383	rna-gnl|WGS:JACGCM|KingUnif01812.1	GO:0003677(DNA binding);GO:0003700(DNA binding transcription factor activity);GO:0005634(nucleus);GO:0006351(transcription, DNA-templated);GO:0006355(regulation of transcription, DNA-templated);GO:0009965(leaf morphogenesis)	NA	NA	NA	PREDICTED: BEL1-like homeodomain protein 4 [Nelumbo nucifera]	NA	0.596368	0.668446	0.803987	7.30516	10.0168	10.6069	3.14978	5.54049	3.04195	3.57388e-20	9.90524e-19	yes
gene-GIB67_039046	GIB67_039046	33891	rna-gnl|WGS:JACGCM|KingUnif12313.1	GO:0005634(nucleus);GO:0008270(zinc ion binding);GO:0009737(response to abscisic acid);GO:0010200(response to chitin)	NA	NA	NA	zinc finger AN1 domain-containing stress-associated protein 12 [Rosa chinensis]	NA	80.6178	222.592	83.9263	32.7319	24.7835	25.7187	13.6494	15.3627	9.66174	3.64016e-20	1.00754e-18	yes
gene-GIB67_023059	GIB67_023059	1624	rna-gnl|WGS:JACGCM|KingUnif11289.1	GO:0016020(membrane);GO:0016709(oxidoreductase activity, acting on paired donors, with incorporation or reduction of molecular oxygen, NAD(P)H as one donor, and incorporation of one atom of oxygen);GO:0044550(secondary metabolite biosynthetic process)	00460(Cyanoamino acid metabolism)	K00495	EC:1.14.14.44	hypothetical protein AQUCO_09300003v1 [Aquilegia coerulea]	NA	4.92746	2.61185	9.99418	89.6401	100.352	230.622	36.1918	29.9105	16.3492	4.44256e-20	1.22798e-18	yes
gene-GIB67_024567	GIB67_024567	32801	rna-gnl|WGS:JACGCM|KingUnif42217.1	GO:0004364(glutathione transferase activity);GO:0005737(cytoplasm);GO:0006749(glutathione metabolic process);GO:0009407(toxin catabolic process)	00480(Glutathione metabolism)	K00799	EC:2.5.1.18	Glutathione S-transferase [Macleaya cordata]	NA	3.06697	0.716606	1.58171	59.3539	31.8362	38.7595	19.4106	16.0829	10.1116	4.4962e-20	1.24113e-18	yes
gene-GIB67_001793	GIB67_001793	37126	rna-gnl|WGS:JACGCM|KingUnif01366.1	GO:0005829(cytosol);GO:0006521(regulation of cellular amino acid metabolic process);GO:0009506(plasmodesma);GO:0009507(chloroplast);GO:0009735(response to cytokinin)	NA	NA	NA	hypothetical protein AQUCO_00200932v1 [Aquilegia coerulea]	NA	4.81206	3.01505	5.52559	26.3057	32.3272	35.8812	8.21473	13.1317	10.069	4.683e-20	1.29096e-18	yes
gene-GIB67_043029	GIB67_043029	6879	rna-gnl|WGS:JACGCM|KingUnif33163.1	GO:0003723(RNA binding);GO:0005515(protein binding);GO:0005634(nucleus);GO:0005737(cytoplasm);GO:0008150(biological_process);GO:0016607(nuclear speck)	03015(mRNA surveillance pathway)	K14396	NA	hypothetical protein CUMW_038790 [Citrus unshiu]	NA	29.0565	23.9665	24.0991	3.88367	3.53957	2.20354	8.4652	11.8121	10.6178	4.7781e-20	1.31542e-18	yes
gene-GIB67_001412	GIB67_001412	14128	rna-gnl|WGS:JACGCM|KingUnif33781.1	NA	NA	NA	NA		NA	52.5619	15.5032	25.3173	182.738	214.97	331.346	20.7648	5.7904	15.0755	4.85915e-20	1.33594e-18	yes
gene-GIB67_003471	GIB67_003471	23735	rna-gnl|WGS:JACGCM|KingUnif37640.1	GO:0006457(protein folding);GO:0009507(chloroplast)	NA	NA	NA	DnaJ domain [Macleaya cordata]	NA	19.9404	6.38303	43.6406	651.253	347.909	495.945	52.9366	34.2449	21.3501	5.13554e-20	1.41005e-18	yes
gene-GIB67_013579	GIB67_013579	43058	rna-gnl|WGS:JACGCM|KingUnif10548.1	GO:0003677(DNA binding);GO:0003700(DNA binding transcription factor activity);GO:0005634(nucleus);GO:0006351(transcription, DNA-templated);GO:0006355(regulation of transcription, DNA-templated);GO:0007275(multicellular organism development);GO:0008283(cell proliferation);GO:0043565(sequence-specific DNA binding);GO:0071365(cellular response to auxin stimulus)	03013(RNA transport);03015(mRNA surveillance pathway);03018(RNA degradation)	K13126	NA	NAC domain [Macleaya cordata]	NA	2.80607	1.98475	2.81647	22.2864	14.4561	24.6281	10.8656	11.5937	12.7074	5.64426e-20	1.54766e-18	yes
gene-GIB67_027631	GIB67_027631	9333	rna-gnl|WGS:JACGCM|KingUnif30751.1	GO:0003677(DNA binding);GO:0003700(DNA binding transcription factor activity);GO:0005515(protein binding);GO:0005634(nucleus);GO:0006351(transcription, DNA-templated);GO:0006355(regulation of transcription, DNA-templated);GO:0007389(pattern specification process);GO:0009733(response to auxin);GO:0009734(auxin-activated signaling pathway);GO:0035198(miRNA binding);GO:0048829(root cap development);…	04075(Plant hormone signal transduction)	K14486	NA	AUX/IAA protein [Macleaya cordata]	NA	1.82004	1.47242	1.52812	17.4537	12.6882	13.1006	6.76379	5.95983	4.43884	6.17552e-20	1.68948e-18	yes
gene-GIB67_032978	GIB67_032978	17207	rna-gnl|WGS:JACGCM|KingUnif02457.1	GO:0003674(molecular_function);GO:0005634(nucleus);GO:0008150(biological_process)	NA	NA	NA	PREDICTED: uncharacterized protein LOC104608044 isoform X1 [Nelumbo nucifera]	NA	0.366766	0.517108	1.15973	13.0186	21.624	24.2794	4.03868	4.2856	4.81097	6.17792e-20	1.68948e-18	yes
gene-GIB67_030920	GIB67_030920	40164	rna-gnl|WGS:JACGCM|KingUnif32756.1	GO:0005794(Golgi apparatus);GO:0008375(acetylglucosaminyltransferase activity);GO:0016757(transferase activity, transferring glycosyl groups)	00510(N-Glycan biosynthesis)	K00737	EC:2.4.1.144	Glycosyl transferase [Macleaya cordata]	NA	3.36263	3.81862	3.62757	19.7111	18.2876	13.0603	2.3257	3.36639	2.19398	6.28913e-20	1.71761e-18	yes
gene-GIB67_019075	GIB67_019075	16737	rna-gnl|WGS:JACGCM|KingUnif32308.1	GO:0004497(monooxygenase activity);GO:0005506(iron ion binding);GO:0005783(endoplasmic reticulum);GO:0016021(integral component of membrane);GO:0016705(oxidoreductase activity, acting on paired donors, with incorporation or reduction of molecular oxygen);GO:0019825(oxygen binding);GO:0020037(heme binding);GO:0055114(oxidation-reduction process)	00071(Fatty acid degradation);00073(Cutin, suberine and wax biosynthesis)	K20495	EC:1.14.14.80	Cytochrome P450 [Macleaya cordata]	NA	14.8377	3.44148	34.416	6.08749	5.75994	9.07753	199.474	272.737	131.222	6.39182e-20	1.74334e-18	yes
gene-GIB67_017244	GIB67_017244	12596	rna-gnl|WGS:JACGCM|KingUnif13503.1	GO:0004674(protein serine/threonine kinase activity);GO:0005886(plasma membrane);GO:0007166(cell surface receptor signaling pathway)	NA	NA	NA	hypothetical protein AQUCO_03500171v1, partial [Aquilegia coerulea]	NA	3.1774	2.63515	3.02337	1.10631	1.59251	1.66732	11.6176	12.1579	9.55206	6.72802e-20	1.8326e-18	yes
gene-GIB67_027599	GIB67_027599	9301	rna-gnl|WGS:JACGCM|KingUnif10600.1	GO:0005515(protein binding);GO:0005737(cytoplasm);GO:0006559(L-phenylalanine catabolic process);GO:0006952(defense response);GO:0006979(response to oxidative stress);GO:0009555(pollen development);GO:0009611(response to wounding);GO:0009699(phenylpropanoid biosynthetic process);GO:0009800(cinnamic acid biosynthetic process);GO:0009819(drought recovery);GO:0010224(response to UV-B);GO:0045548(phen…	00360(Phenylalanine metabolism);00940(Phenylpropanoid biosynthesis)	K10775	EC:4.3.1.24	hypothetical protein AQUCO_03000132v1 [Aquilegia coerulea]	NA	48.9041	27.2863	27.9378	612.305	568.424	1074.62	184.213	240.451	69.5381	6.85428e-20	1.86453e-18	yes
gene-GIB67_000531	GIB67_000531	22501	rna-gnl|WGS:JACGCM|KingUnif11648.1	GO:0003677(DNA binding);GO:0003700(DNA binding transcription factor activity);GO:0005515(protein binding);GO:0005634(nucleus);GO:0006351(transcription, DNA-templated);GO:0006355(regulation of transcription, DNA-templated);GO:0008283(cell proliferation);GO:0009735(response to cytokinin);GO:0009737(response to abscisic acid);GO:0009739(response to gibberellin);GO:0010029(regulation of seed germinat…	04712(Circadian rhythm - plant)	K16221	NA	PREDICTED: transcription factor TCP15-like isoform X1 [Nelumbo nucifera]	NA	4.23555	3.55572	3.02596	29.56	29.6512	32.006	8.1507	3.6791	7.53353	7.00002e-20	1.90166e-18	yes
gene-GIB67_023934	GIB67_023934	26732	rna-gnl|WGS:JACGCM|KingUnif23264.1	GO:0005886(plasma membrane);GO:0016301(kinase activity);GO:0016310(phosphorylation)	NA	NA	NA	hypothetical protein AQUCO_04100057v1 [Aquilegia coerulea]	NA	4.59885	3.44065	8.03423	55.644	53.8974	37.5836	28.7538	23.7129	21.0465	7.35624e-20	1.99579e-18	yes
gene-GIB67_003099	GIB67_003099	14593	rna-gnl|WGS:JACGCM|KingUnif38528.1	GO:0004004(ATP-dependent RNA helicase activity);GO:0010501(RNA secondary structure unwinding)	NA	NA	NA	cohesin subunit rad21, putative [Ricinus communis]	NA	11.3217	26.1005	10.0652	1.02573	0.690232	1.60643	1.91031	1.56371	2.16045	7.49357e-20	2.03037e-18	yes
gene-GIB67_026821	GIB67_026821	22906	rna-gnl|WGS:JACGCM|KingUnif30354.1	GO:0000785(chromatin);GO:0003677(DNA binding);GO:0003682(chromatin binding);GO:0003700(DNA binding transcription factor activity);GO:0005634(nucleus);GO:0005829(cytosol);GO:0006333(chromatin assembly or disassembly);GO:0030527(structural constituent of chromatin)	03410(Base excision repair)	K10802	NA	High mobility group box domain [Macleaya cordata]	NA	178.395	119.928	142.912	821.447	855.915	676.706	196.834	204.796	180.555	7.86249e-20	2.12753e-18	yes
gene-GIB67_030377	GIB67_030377	26715	rna-gnl|WGS:JACGCM|KingUnif30094.1	GO:0004364(glutathione transferase activity);GO:0005737(cytoplasm);GO:0006749(glutathione metabolic process);GO:0010731(protein glutathionylation)	00480(Glutathione metabolism)	K00799	EC:2.5.1.18	Glutathione S-transferase [Macleaya cordata]	NA	37.8986	27.1604	43.8107	269.238	224.486	195.098	189.291	260.281	211.931	8.74766e-20	2.36394e-18	yes
gene-GIB67_023964	GIB67_023964	32647	rna-gnl|WGS:JACGCM|KingUnif17715.1	GO:0005515(protein binding);GO:0005634(nucleus);GO:0008017(microtubule binding);GO:0043622(cortical microtubule organization);GO:0051511(negative regulation of unidimensional cell growth)	NA	NA	NA	TPX2 [Macleaya cordata]	NA	5.34521	6.15604	8.38253	48.2776	41.4846	38.4621	33.6686	25.5594	22.463	8.9822e-20	2.42413e-18	yes
gene-GIB67_007338	GIB67_007338	5463	rna-gnl|WGS:JACGCM|KingUnif03368.1	GO:0003677(DNA binding);GO:0003700(DNA binding transcription factor activity);GO:0005634(nucleus);GO:0006351(transcription, DNA-templated);GO:0006355(regulation of transcription, DNA-templated);GO:0007275(multicellular organism development)	03013(RNA transport);03015(mRNA surveillance pathway);03018(RNA degradation)	K13126	NA	NAC domain [Macleaya cordata]	NA	6.48198	2.32813	15.1311	261.05	191.643	326.168	91.1401	51.294	50.6549	9.39244e-20	2.53153e-18	yes
gene-GIB67_013476	GIB67_013476	32215	rna-gnl|WGS:JACGCM|KingUnif10185.1	GO:0010152(pollen maturation)	04144(Endocytosis)	K12486	NA	C2 calcium-dependent membrane targeting [Macleaya cordata]	NA	0.623003	1.06519	1.03824	5.41272	6.2214	7.25246	0.7307	1.1886	0.982554	1.0269e-19	2.76417e-18	yes
gene-GIB67_035710	GIB67_035710	27066	rna-gnl|WGS:JACGCM|KingUnif11025.1	GO:0016021(integral component of membrane);GO:0042626(ATPase activity, coupled to transmembrane movement of substances);GO:0055085(transmembrane transport)	02010(ABC transporters)	K05658	EC:3.6.3.44	ABC transporter B family member 15 [Prunus persica]	NA	2.43974	0.816142	0.865102	23.9588	11.0597	10.4096	1.49953	0.871424	0.990958	1.10958e-19	2.98282e-18	yes
gene-GIB67_023201	GIB67_023201	24704	rna-gnl|WGS:JACGCM|KingUnif16001.1	GO:0004664(prephenate dehydratase activity);GO:0005737(cytoplasm);GO:0005829(cytosol);GO:0006571(tyrosine biosynthetic process);GO:0009094(L-phenylalanine biosynthetic process);GO:0009507(chloroplast);GO:0009570(chloroplast stroma);GO:0010244(response to low fluence blue light stimulus by blue low-fluence system);GO:0047769(arogenate dehydratase activity);GO:0080167(response to karrikin)	00400(Phenylalanine, tyrosine and tryptophan biosynthesis)	K05359	EC:4.2.1.91;EC:4.2.1.51	PREDICTED: arogenate dehydratase/prephenate dehydratase 6, chloroplastic-like [Nelumbo nucifera]	NA	2.52387	1.32858	3.63231	86.7956	67.2861	156.121	22.4685	22.4148	3.52323	1.17308e-19	3.1494e-18	yes
gene-GIB67_040093	GIB67_040093	18460	rna-gnl|WGS:JACGCM|KingUnif23869.1	GO:0004683(calmodulin-dependent protein kinase activity);GO:0005516(calmodulin binding);GO:0005634(nucleus);GO:0005737(cytoplasm);GO:0005886(plasma membrane);GO:0009738(abscisic acid-activated signaling pathway);GO:0009931(calcium-dependent protein serine/threonine kinase activity);GO:0018105(peptidyl-serine phosphorylation);GO:0035556(intracellular signal transduction);GO:0046777(protein autopho…	04626(Plant-pathogen interaction)	K13412	EC:2.7.11.1	calcium-dependent protein kinase 32 [Carica papaya]	NA	27.1128	35.1011	37.9895	170.656	178.956	194.678	55.2141	57.1707	43.4497	1.28226e-19	3.43803e-18	yes
gene-GIB67_017489	GIB67_017489	27480	rna-gnl|WGS:JACGCM|KingUnif02664.1	GO:0005351(carbohydrate:proton symporter activity);GO:0005355(glucose transmembrane transporter activity);GO:0005887(integral component of plasma membrane);GO:0046323(glucose import)	NA	NA	NA	Sugar/inositol transporter [Macleaya cordata]	NA	29.7235	16.644	31.4585	361.222	255.137	347.194	147.218	131.585	62.65	1.32181e-19	3.53945e-18	yes
gene-GIB67_020259	GIB67_020259	3104	rna-gnl|WGS:JACGCM|KingUnif17186.1	GO:0003333(amino acid transmembrane transport);GO:0015171(amino acid transmembrane transporter activity)	NA	NA	NA	Amino acid transporter [Macleaya cordata]	NA	34.6581	50.6262	18.2295	6.52102	4.33877	3.54536	52.4195	52.1705	47.0041	1.34412e-19	3.59452e-18	yes
gene-GIB67_027903	GIB67_027903	35413	rna-gnl|WGS:JACGCM|KingUnif29480.1	GO:0004674(protein serine/threonine kinase activity);GO:0005524(ATP binding);GO:0005886(plasma membrane);GO:0006468(protein phosphorylation);GO:0007169(transmembrane receptor protein tyrosine kinase signaling pathway);GO:0016021(integral component of membrane);GO:0016301(kinase activity);GO:0016310(phosphorylation)	NA	NA	NA	LRR.XII-like protein, partial [Platanus x hispanica]	NA	2.21338	3.6144	2.27535	14.1804	23.0534	26.922	4.36372	3.09274	4.81841	1.36967e-19	3.65808e-18	yes
gene-GIB67_003463	GIB67_003463	23732	rna-gnl|WGS:JACGCM|KingUnif37568.1	GO:0004185(serine-type carboxypeptidase activity);GO:0005773(vacuole);GO:0051603(proteolysis involved in cellular protein catabolic process)	NA	NA	NA	serine carboxypeptidase-like 34 [Ricinus communis]	NA	9.67978	6.96984	16.5658	11.7966	12.3716	8.52522	72.1788	57.6996	48.3911	1.51168e-19	4.03211e-18	yes
gene-GIB67_024983	GIB67_024983	13824	rna-gnl|WGS:JACGCM|KingUnif40618.1	GO:0004503(monophenol monooxygenase activity);GO:0036263(L-DOPA monooxygenase activity)	00350(Tyrosine metabolism);00950(Isoquinoline alkaloid biosynthesis)	K00422	EC:1.10.3.1	PREDICTED: polyphenol oxidase, chloroplastic-like [Nelumbo nucifera]	NA	0.590983	0.610819	1.04448	47.0787	13.9445	30.9961	144.117	41.6898	19.7905	1.54369e-19	4.11219e-18	yes
gene-GIB67_028373	GIB67_028373	22740	rna-gnl|WGS:JACGCM|KingUnif27494.1	GO:0004252(serine-type endopeptidase activity);GO:0016485(protein processing)	NA	NA	NA	RHOMBOID-like 2 [Theobroma cacao]	NA	30.6985	28.3277	21.9309	85.4879	102.833	118.292	23.7406	26.683	25.6633	1.54656e-19	4.11448e-18	yes
gene-GIB67_012434	GIB67_012434	33593	rna-gnl|WGS:JACGCM|KingUnif18456.1	GO:0042803(protein homodimerization activity)	00941(Flavonoid biosynthesis);04712(Circadian rhythm - plant)	K00660	EC:2.3.1.74	chalcone synthase [Lonicera japonica]	NA	3.12471	1.23826	5.4281	115.932	129.69	345.97	86.0116	122.284	33.094	1.59759e-19	4.24476e-18	yes
gene-GIB67_007816	GIB67_007816	16223	rna-gnl|WGS:JACGCM|KingUnif08549.1	GO:0004722(protein serine/threonine phosphatase activity);GO:0005515(protein binding);GO:0005634(nucleus);GO:0005794(Golgi apparatus);GO:0005829(cytosol);GO:0005886(plasma membrane);GO:0006470(protein dephosphorylation);GO:0009414(response to water deprivation);GO:0009658(chloroplast organization);GO:0009737(response to abscisic acid);GO:0009788(negative regulation of abscisic acid-activated sign…	04016(MAPK signaling pathway - plant);04075(Plant hormone signal transduction)	K14497	EC:3.1.3.16	PREDICTED: protein phosphatase 2C 37-like [Nelumbo nucifera]	NA	15.6128	5.69283	7.87377	81.2827	41.201	82.4515	6.74465	9.76961	4.04828	1.6522e-19	4.3842e-18	yes
gene-GIB67_025504	GIB67_025504	36	rna-gnl|WGS:JACGCM|KingUnif01758.1	NA	NA	NA	NA	hypothetical protein AQUCO_00500118v1 [Aquilegia coerulea]	NA	0.478088	0.430443	0.705273	9.91281	11.0118	8.72023	3.49017	3.10814	2.05743	1.69124e-19	4.482e-18	yes
gene-GIB67_011402	GIB67_011402	8922	rna-gnl|WGS:JACGCM|KingUnif02236.1	GO:0005737(cytoplasm);GO:0031625(ubiquitin protein ligase binding);GO:0061630(ubiquitin protein ligase activity)	NA	NA	NA	fatty acid desaturase 4, chloroplastic-like [Lactuca sativa]	NA	0.142152	0.644813	0.767488	19.0467	20.8564	17.466	0.641629	0	0.226319	1.77126e-19	4.68804e-18	yes
gene-GIB67_001042	GIB67_001042	23445	rna-gnl|WGS:JACGCM|KingUnif20131.1	GO:0004674(protein serine/threonine kinase activity);GO:0005634(nucleus);GO:0005737(cytoplasm);GO:0005886(plasma membrane);GO:0035556(intracellular signal transduction)	NA	NA	NA	Protein kinase domain [Macleaya cordata]	NA	10.5547	10.5693	12.5326	66.5982	50.1689	53.2801	24.6181	28.4486	25.2836	1.81537e-19	4.79861e-18	yes
gene-GIB67_039750	GIB67_039750	20233	rna-gnl|WGS:JACGCM|KingUnif27037.1	GO:0004806(triglyceride lipase activity);GO:0005576(extracellular region);GO:0006629(lipid metabolic process);GO:0016298(lipase activity)	NA	NA	NA	Lipase [Macleaya cordata]	NA	5.94292	8.69874	4.2373	37.7364	31.777	50.6046	7.92054	10.9044	6.00251	1.8559e-19	4.89944e-18	yes
gene-GIB67_014634	GIB67_014634	6146	rna-gnl|WGS:JACGCM|KingUnif36457.1	GO:0004834(tryptophan synthase activity);GO:0005737(cytoplasm);GO:0030170(pyridoxal phosphate binding)	00260(Glycine, serine and threonine metabolism);00400(Phenylalanine, tyrosine and tryptophan biosynthesis)	K01696	EC:4.2.1.20	tryptophan synthase beta chain 2 [Camellia sinensis]	NA	13.4241	11.1283	13.0239	0.5984	0.830504	0.364626	4.13526	11.0596	5.03288	1.87913e-19	4.9544e-18	yes
gene-GIB67_028424	GIB67_028424	24793	rna-gnl|WGS:JACGCM|KingUnif27016.1	GO:0003959(NADPH dehydrogenase activity);GO:0005622(intracellular);GO:0055114(oxidation-reduction process)	00592(alpha-Linolenic acid metabolism)	K05894	EC:1.3.1.42	putative 12-oxophytodienoate reductase 11 isoform X2 [Hevea brasiliensis]	NA	1.94183	2.11547	3.31574	26.602	55.7629	90.5202	47.2945	26.2091	15.7417	2.00958e-19	5.29154e-18	yes
gene-GIB67_020492	GIB67_020492	6946	rna-gnl|WGS:JACGCM|KingUnif14366.1	GO:0003677(DNA binding);GO:0003700(DNA binding transcription factor activity);GO:0005634(nucleus);GO:0006351(transcription, DNA-templated);GO:0006355(regulation of transcription, DNA-templated);GO:0046983(protein dimerization activity)	NA	NA	NA	Myc-type [Macleaya cordata]	NA	0.696591	0.871719	0.501009	5.0742	8.43582	23.6589	0.438753	0.373598	0.138314	2.09406e-19	5.50695e-18	yes
gene-GIB67_025633	GIB67_025633	38243	rna-gnl|WGS:JACGCM|KingUnif37739.1	GO:0005737(cytoplasm);GO:0030001(metal ion transport);GO:0046914(transition metal ion binding);GO:0046916(cellular transition metal ion homeostasis)	NA	NA	NA	copper transport protein ATX1-like [Hevea brasiliensis]	NA	89.1688	79.2668	94.5808	64.1499	81.9872	73.496	267.058	482.703	294.326	2.195e-19	5.76503e-18	yes
gene-GIB67_034386	GIB67_034386	7379	rna-gnl|WGS:JACGCM|KingUnif35239.1	GO:0005634(nucleus)	04141(Protein processing in endoplasmic reticulum)	K09503	NA	Terminal organelle assembly protein [Parasponia andersonii]	NA	1956.77	2560.65	1884.93	221.354	213.856	179.843	1126.64	1101.4	684.763	2.33349e-19	6.12094e-18	yes
gene-GIB67_002605	GIB67_002605	1588	rna-gnl|WGS:JACGCM|KingUnif43192.1	GO:0005634(nucleus);GO:0005829(cytosol);GO:0005886(plasma membrane);GO:0016020(membrane)	NA	NA	NA	hypothetical protein BVC80_9099g173 [Macleaya cordata]	NA	2.135	3.32029	1.21917	22.9721	19.1348	21.8065	10.1867	11.2422	13.9878	2.34324e-19	6.1387e-18	yes
gene-GIB67_014117	GIB67_014117	15237	rna-gnl|WGS:JACGCM|KingUnif40150.1	GO:0004674(protein serine/threonine kinase activity);GO:0005829(cytosol);GO:0006468(protein phosphorylation);GO:0035556(intracellular signal transduction)	NA	NA	NA	probable serine/threonine-protein kinase WNK11 isoform X1 [Arachis duranensis]	NA	4.55954	6.27495	1.49191	0	0	0.054637	0	0	0	2.59911e-19	6.80034e-18	yes
gene-GIB67_041346	GIB67_041346	10157	rna-gnl|WGS:JACGCM|KingUnif07828.1	GO:0003333(amino acid transmembrane transport);GO:0005886(plasma membrane);GO:0015171(amino acid transmembrane transporter activity)	NA	NA	NA	amino acid permease 8-like [Papaver somniferum]	NA	0.552446	1.78323	0.98807	10.3641	22.5986	9.752	0.579085	0.990133	1.11643	2.62257e-19	6.853e-18	yes
gene-GIB67_016429	GIB67_016429	23035	rna-gnl|WGS:JACGCM|KingUnif17273.1	NA	NA	NA	NA		NA	0	0	0	0	0	0	4.02155	0.673444	3.51292	2.7017e-19	7.05081e-18	yes
gene-GIB67_021276	GIB67_021276	35803	rna-gnl|WGS:JACGCM|KingUnif33772.1	GO:0008420(CTD phosphatase activity);GO:0016591(DNA-directed RNA polymerase II, holoenzyme);GO:0070940(dephosphorylation of RNA polymerase II C-terminal domain)	NA	NA	NA	NLI interacting factor [Macleaya cordata]	NA	2.1545	1.94956	2.56702	12.104	12.3013	13.1763	5.45641	6.83507	5.21974	3.03577e-19	7.91262e-18	yes
gene-GIB67_041094	GIB67_041094	34103	rna-gnl|WGS:JACGCM|KingUnif18532.1	GO:0003700(DNA binding transcription factor activity);GO:0005515(protein binding);GO:0005634(nucleus);GO:0006351(transcription, DNA-templated);GO:0006355(regulation of transcription, DNA-templated);GO:0009751(response to salicylic acid);GO:0009753(response to jasmonic acid);GO:0009862(systemic acquired resistance, salicylic acid mediated signaling pathway);GO:0009864(induced systemic resistance, …	NA	NA	NA	DNA-binding WRKY [Macleaya cordata]	NA	14.1469	33.1975	10.9641	104.775	189.544	87.6579	8.13151	6.14734	13.4847	3.09373e-19	8.05349e-18	yes
gene-GIB67_022288	GIB67_022288	42606	rna-gnl|WGS:JACGCM|KingUnif22091.1	GO:0000249(C-22 sterol desaturase activity);GO:0016126(sterol biosynthetic process)	NA	NA	NA	hypothetical protein AQUCO_04500211v1, partial [Aquilegia coerulea]	NA	0	0	0	4.56491	3.78727	3.18888	0.076114	0	0.199188	3.11216e-19	8.09123e-18	yes
gene-GIB67_000885	GIB67_000885	34584	rna-gnl|WGS:JACGCM|KingUnif29159.1	GO:0004970(ionotropic glutamate receptor activity);GO:0005217(intracellular ligand-gated ion channel activity);GO:0005515(protein binding);GO:0005634(nucleus);GO:0006811(ion transport);GO:0006874(cellular calcium ion homeostasis);GO:0009416(response to light stimulus);GO:0016021(integral component of membrane)	NA	NA	NA	hypothetical protein AQUCO_06800019v1, partial [Aquilegia coerulea]	NA	0.32093	0.222333	0.339329	3.78352	9.99968	7.69405	2.56548	2.349	1.07635	3.97937e-19	1.03328e-17	yes
gene-GIB67_010837	GIB67_010837	38526	rna-gnl|WGS:JACGCM|KingUnif32037.1	GO:0003824(catalytic activity);GO:0005634(nucleus);GO:0005737(cytoplasm);GO:0007275(multicellular organism development);GO:0009646(response to absence of light);GO:0009813(flavonoid biosynthetic process);GO:0010422(regulation of brassinosteroid biosynthetic process);GO:0016131(brassinosteroid metabolic process);GO:0016132(brassinosteroid biosynthetic process);GO:0016491(oxidoreductase activity);G…	00941(Flavonoid biosynthesis)	K13082	EC:1.1.1.219;EC:1.1.1.234	NAD-dependent epimerase/dehydratase [Macleaya cordata]	NA	3.04283	1.93672	11.7793	3.69729	6.04811	4.84101	64.7948	74.4641	52.6527	4.12576e-19	1.06994e-17	yes
gene-GIB67_021736	GIB67_021736	40452	rna-gnl|WGS:JACGCM|KingUnif34162.1	GO:0003674(molecular_function);GO:0005634(nucleus);GO:0005654(nucleoplasm);GO:0005681(spliceosomal complex);GO:0005689(U12-type spliceosomal complex);GO:0005829(cytosol);GO:0006397(mRNA processing);GO:0008150(biological_process);GO:0008380(RNA splicing);GO:0046872(metal ion binding)	NA	NA	NA	hypothetical protein BVC80_1157g16 [Macleaya cordata]	NA	5.29393	8.59547	4.3594	0.682642	0.522815	0.438068	1.14736	1.74103	1.42197	4.29924e-19	1.11352e-17	yes
gene-GIB67_035933	GIB67_035933	16343	rna-gnl|WGS:JACGCM|KingUnif36749.1	GO:0004601(peroxidase activity);GO:0005576(extracellular region);GO:0006979(response to oxidative stress);GO:0020037(heme binding);GO:0042744(hydrogen peroxide catabolic process);GO:0046872(metal ion binding);GO:0055114(oxidation-reduction process);GO:0071456(cellular response to hypoxia)	00940(Phenylpropanoid biosynthesis)	K00430	EC:1.11.1.7	lignin-forming anionic peroxidase [Cinnamomum micranthum f. kanehirae]	NA	0.389997	0.12696	0.545995	13.5793	11.2051	41.4162	20.6051	8.80664	13.3635	4.56216e-19	1.18014e-17	yes
gene-GIB67_031973	GIB67_031973	6700	rna-gnl|WGS:JACGCM|KingUnif15840.1	GO:0003677(DNA binding);GO:0003700(DNA binding transcription factor activity);GO:0005634(nucleus);GO:0006351(transcription, DNA-templated);GO:0006355(regulation of transcription, DNA-templated);GO:0007275(multicellular organism development);GO:0009611(response to wounding);GO:0009788(negative regulation of abscisic acid-activated signaling pathway)	NA	NA	NA	PREDICTED: NAC domain-containing protein 2 [Pyrus x bretschneideri]	NA	33.625	26.5267	55.466	298.523	216.294	274.036	78.1929	65.8294	66.8271	4.81491e-19	1.24395e-17	yes
gene-GIB67_008993	GIB67_008993	30612	rna-gnl|WGS:JACGCM|KingUnif05025.1	GO:0002679(respiratory burst involved in defense response);GO:0004601(peroxidase activity);GO:0005509(calcium ion binding);GO:0005515(protein binding);GO:0005886(plasma membrane);GO:0005887(integral component of plasma membrane);GO:0006952(defense response);GO:0007231(osmosensory signaling pathway);GO:0009723(response to ethylene);GO:0009738(abscisic acid-activated signaling pathway);GO:0009873(e…	04016(MAPK signaling pathway - plant);04626(Plant-pathogen interaction)	K13447	EC:1.6.3.-;EC:1.11.1.-	Cytochrome b245 [Macleaya cordata]	NA	3.20912	5.82607	3.02371	0.121912	0.048226	0.094082	2.47248	1.38371	4.36742	4.9067e-19	1.26608e-17	yes
gene-GIB67_042382	GIB67_042382	10874	rna-gnl|WGS:JACGCM|KingUnif02557.1	GO:0004185(serine-type carboxypeptidase activity);GO:0005773(vacuole);GO:0051603(proteolysis involved in cellular protein catabolic process)	NA	NA	NA	Peptidase S10 [Macleaya cordata]	NA	17.7696	11.8881	23.6883	9.36187	20.234	12.6125	197.613	102.832	67.5554	5.26785e-19	1.35756e-17	yes
gene-GIB67_012930	GIB67_012930	11484	rna-gnl|WGS:JACGCM|KingUnif26984.1	GO:0005506(iron ion binding);GO:0005576(extracellular region);GO:0005789(endoplasmic reticulum membrane);GO:0009611(response to wounding);GO:0016021(integral component of membrane);GO:0018685(alkane 1-monooxygenase activity);GO:0019825(oxygen binding);GO:0020037(heme binding);GO:0043231(intracellular membrane-bounded organelle);GO:0055114(oxidation-reduction process)	NA	NA	NA	Cytochrome P450 [Macleaya cordata]	NA	0.824556	0.567154	0.851494	5.3795	11.1579	25.0907	0.496674	1.23414	0.726605	5.41575e-19	1.39393e-17	yes
gene-GIB67_042431	GIB67_042431	26120	rna-gnl|WGS:JACGCM|KingUnif07079.1	GO:0009507(chloroplast);GO:0015996(chlorophyll catabolic process);GO:0080124(pheophytinase activity)	NA	NA	NA	PREDICTED: pheophytinase, chloroplastic [Theobroma cacao]	NA	52.7997	45.4158	77.2208	365.786	287.211	410.975	127.697	99.8718	102.8	6.03199e-19	1.5506e-17	yes
gene-GIB67_041498	GIB67_041498	19930	rna-gnl|WGS:JACGCM|KingUnif05579.1	GO:0005524(ATP binding);GO:0005739(mitochondrion);GO:0005774(vacuolar membrane);GO:0005829(cytosol);GO:0006458('de novo' protein folding);GO:0042026(protein refolding);GO:0044183(protein binding involved in protein folding);GO:0045041(protein import into mitochondrial intermembrane space);GO:0046686(response to cadmium ion);GO:0051082(unfolded protein binding);GO:0061077(chaperone-mediated protei…	03018(RNA degradation)	K04077	NA	Chaperonin Cpn60 [Macleaya cordata]	NA	4.87273	6.17796	3.35042	2.49146	5.05505	4.02209	26.6247	19.7272	32.5646	6.71434e-19	1.72385e-17	yes
gene-GIB67_035971	GIB67_035971	16386	rna-gnl|WGS:JACGCM|KingUnif00922.1	GO:0005886(plasma membrane);GO:0009416(response to light stimulus);GO:0016567(protein ubiquitination)	NA	NA	NA	PREDICTED: BTB/POZ domain-containing protein At3g19850-like [Nelumbo nucifera]	NA	9.14398	4.0037	15.011	3.59017	2.40536	1.79506	26.1622	61.8128	38.537	6.84373e-19	1.75488e-17	yes
gene-GIB67_020294	GIB67_020294	3145	rna-gnl|WGS:JACGCM|KingUnif08345.1	GO:0000145(exocyst);GO:0005515(protein binding);GO:0005737(cytoplasm);GO:0005829(cytosol);GO:0005886(plasma membrane);GO:0006887(exocytosis);GO:0006904(vesicle docking involved in exocytosis);GO:0009414(response to water deprivation);GO:0009789(positive regulation of abscisic acid-activated signaling pathway);GO:0012505(endomembrane system);GO:0042742(defense response to bacterium);GO:0045335(pha…	NA	NA	NA	Exocyst complex protein Exo70 [Macleaya cordata]	NA	15.5799	15.0126	21.0955	87.1127	95.2981	96.9222	34.0032	38.892	24.7386	6.95899e-19	1.78221e-17	yes
gene-GIB67_032436	GIB67_032436	3462	rna-gnl|WGS:JACGCM|KingUnif32250.1	GO:0016020(membrane);GO:0016709(oxidoreductase activity, acting on paired donors, with incorporation or reduction of molecular oxygen, NAD(P)H as one donor, and incorporation of one atom of oxygen);GO:0044550(secondary metabolite biosynthetic process)	NA	NA	NA	PREDICTED: cytochrome P450 CYP736A12 [Vitis vinifera]	NA	0	0	0.053476	5.53011	3.19636	2.74772	2.88427	2.80395	2.44421	7.12904e-19	1.82349e-17	yes
gene-GIB67_037327	GIB67_037327	19610	rna-gnl|WGS:JACGCM|KingUnif40276.1	GO:0004674(protein serine/threonine kinase activity);GO:0004842(ubiquitin-protein transferase activity);GO:0005524(ATP binding);GO:0005886(plasma membrane);GO:0006468(protein phosphorylation);GO:0016301(kinase activity);GO:0016567(protein ubiquitination);GO:0046777(protein autophosphorylation)	NA	NA	NA	Protein kinase domain [Macleaya cordata]	NA	26.3964	47.5328	28.5148	190.433	138.221	195.979	33.9029	39.0081	36.0789	7.22121e-19	1.84477e-17	yes
gene-GIB67_019277	GIB67_019277	16940	rna-gnl|WGS:JACGCM|KingUnif24421.1	GO:0004664(prephenate dehydratase activity);GO:0009094(L-phenylalanine biosynthetic process);GO:0009507(chloroplast);GO:0009570(chloroplast stroma);GO:0047769(arogenate dehydratase activity)	00400(Phenylalanine, tyrosine and tryptophan biosynthesis)	K05359	EC:4.2.1.91;EC:4.2.1.51	Prephenate dehydratase [Macleaya cordata]	NA	341.553	360.693	639.41	70.4727	71.2011	59.3044	468.319	551.79	450.086	7.39197e-19	1.88605e-17	yes
gene-GIB67_024504	GIB67_024504	32739	rna-gnl|WGS:JACGCM|KingUnif38572.1	GO:0001056(RNA polymerase III activity);GO:0005666(DNA-directed RNA polymerase III complex)	NA	NA	NA	PREDICTED: DNA-directed RNA polymerase IV subunit 1 isoform X4 [Nelumbo nucifera]	NA	1.57558	2.3624	1.27006	13.3422	16.8332	21.7864	4.84958	3.00658	5.52039	7.98066e-19	2.03373e-17	yes
gene-GIB67_012491	GIB67_012491	18353	rna-gnl|WGS:JACGCM|KingUnif41049.1	GO:0003677(DNA binding);GO:0003700(DNA binding transcription factor activity);GO:0003899(DNA-directed 5'-3' RNA polymerase activity);GO:0006352(DNA-templated transcription, initiation);GO:0006355(regulation of transcription, DNA-templated);GO:0006399(tRNA metabolic process);GO:0009507(chloroplast);GO:0009637(response to blue light);GO:0009658(chloroplast organization);GO:0010114(response to red l…	00970(Aminoacyl-tRNA biosynthesis)	K01872	EC:6.1.1.7	PREDICTED: RNA polymerase sigma factor sigB-like [Nelumbo nucifera]	NA	8.03171	7.2394	4.79472	25.8016	37.4231	36.6963	8.13967	6.12739	7.6144	8.61147e-19	2.19177e-17	yes
gene-GIB67_010567	GIB67_010567	25387	rna-gnl|WGS:JACGCM|KingUnif17101.1	GO:0006855(drug transmembrane transport)	NA	NA	NA	PREDICTED: protein DETOXIFICATION 20-like [Nelumbo nucifera]	NA	26.8505	22.4974	28.6359	89.6779	98.4218	95.3092	19.5396	23.754	27.0197	8.68441e-19	2.2076e-17	yes
gene-GIB67_009074	GIB67_009074	20749	rna-gnl|WGS:JACGCM|KingUnif02575.1	GO:0005737(cytoplasm);GO:0005834(heterotrimeric G-protein complex);GO:0007165(signal transduction)	NA	NA	NA	WD40 repeat [Macleaya cordata]	NA	0.502351	0.29172	0.646534	7.04894	5.53247	6.7173	6.36622	3.37364	5.3834	8.88726e-19	2.25638e-17	yes
gene-GIB67_007405	GIB67_007405	21409	rna-gnl|WGS:JACGCM|KingUnif08061.1	GO:0003674(molecular_function);GO:0005739(mitochondrion);GO:0008150(biological_process);GO:0009536(plastid);GO:0009941(chloroplast envelope)	NA	NA	NA	hypothetical protein BVC80_8893g25 [Macleaya cordata]	NA	2.95676	2.31269	4.07053	1.57873	1.88236	1.97527	18.8825	13.6165	13.5842	9.34961e-19	2.37084e-17	yes
gene-GIB67_028425	GIB67_028425	24792	rna-gnl|WGS:JACGCM|KingUnif28383.1	GO:0003959(NADPH dehydrogenase activity);GO:0005622(intracellular);GO:0055114(oxidation-reduction process)	00592(alpha-Linolenic acid metabolism)	K05894	EC:1.3.1.42	putative 12-oxophytodienoate reductase 11 isoform X1 [Hevea brasiliensis]	NA	1.94489	2.10804	3.52836	26.443	55.6589	86.9198	48.593	26.0529	16.0212	9.50303e-19	2.40677e-17	yes
gene-GIB67_030238	GIB67_030238	20964	rna-gnl|WGS:JACGCM|KingUnif36597.1	GO:0003674(molecular_function);GO:0005739(mitochondrion);GO:0008150(biological_process)	NA	NA	NA	Protein of unknown function DUF810 [Macleaya cordata]	NA	10.5277	9.7274	5.94244	1.07981	1.84456	0.831262	11.4914	11.3897	18.6862	9.53203e-19	2.41115e-17	yes
gene-GIB67_009686	GIB67_009686	37307	rna-gnl|WGS:JACGCM|KingUnif08865.1	GO:0003677(DNA binding);GO:0004824(lysine-tRNA ligase activity);GO:0005524(ATP binding);GO:0005737(cytoplasm);GO:0005829(cytosol);GO:0006430(lysyl-tRNA aminoacylation);GO:0009506(plasmodesma);GO:0046872(metal ion binding)	00970(Aminoacyl-tRNA biosynthesis)	K04567	EC:6.1.1.6	hypothetical protein SETIT_9G178100v2 [Setaria italica]	NA	1.71933	2.19061	1.48849	0.04897	0	0.088499	8.61445	2.81776	8.29651	9.91127e-19	2.504e-17	yes
gene-GIB67_007850	GIB67_007850	21581	rna-gnl|WGS:JACGCM|KingUnif36595.1	GO:0000911(cytokinesis by cell plate formation);GO:0005886(plasma membrane);GO:0009507(chloroplast);GO:0009825(multidimensional cell growth);GO:0030136(clathrin-coated vesicle);GO:0040008(regulation of growth)	NA	NA	NA	PREDICTED: coiled-coil domain-containing protein SCD2-like isoform X1 [Juglans regia]	NA	10.6122	11.3671	9.88305	26.1181	21.6798	25.2222	53.4224	44.3715	51.9612	1.00848e-18	2.5447e-17	yes
gene-GIB67_017844	GIB67_017844	37232	rna-gnl|WGS:JACGCM|KingUnif33982.1	GO:0004601(peroxidase activity);GO:0005576(extracellular region);GO:0006979(response to oxidative stress);GO:0020037(heme binding);GO:0042744(hydrogen peroxide catabolic process);GO:0046872(metal ion binding);GO:0055114(oxidation-reduction process);GO:0071456(cellular response to hypoxia)	00940(Phenylpropanoid biosynthesis)	K00430	EC:1.11.1.7	lignin-forming anionic peroxidase [Cinnamomum micranthum f. kanehirae]	NA	0.082017	0.086129	0.161832	2.37543	2.62929	5.45495	16.9598	4.11798	11.2613	1.07169e-18	2.70089e-17	yes
gene-GIB67_004809	GIB67_004809	32976	rna-gnl|WGS:JACGCM|KingUnif13819.1	GO:0003677(DNA binding);GO:0003700(DNA binding transcription factor activity);GO:0005515(protein binding);GO:0005634(nucleus);GO:0006351(transcription, DNA-templated);GO:0006355(regulation of transcription, DNA-templated)	NA	NA	NA	hypothetical protein AQUCO_01000581v1 [Aquilegia coerulea]	NA	26.983	29.5885	19.3967	144.758	128.564	155.414	36.8859	47.9238	49.8596	1.10435e-18	2.77981e-17	yes
gene-GIB67_024080	GIB67_024080	21019	rna-gnl|WGS:JACGCM|KingUnif15376.1	GO:0005516(calmodulin binding);GO:0005634(nucleus);GO:0005886(plasma membrane)	NA	NA	NA	IQ motif [Macleaya cordata]	NA	19.3138	11.4292	18.0517	115.266	86.8171	94.7411	49.308	47.8123	41.7393	1.12429e-18	2.82653e-17	yes
gene-GIB67_012645	GIB67_012645	11196	rna-gnl|WGS:JACGCM|KingUnif37840.1	GO:0004089(carbonate dehydratase activity);GO:0005886(plasma membrane);GO:0008270(zinc ion binding);GO:0009409(response to cold);GO:0009507(chloroplast);GO:0009535(chloroplast thylakoid membrane);GO:0009570(chloroplast stroma);GO:0009579(thylakoid);GO:0009817(defense response to fungus, incompatible interaction);GO:0009941(chloroplast envelope);GO:0010037(response to carbon dioxide);GO:0010119(re…	00910(Nitrogen metabolism)	K01673	EC:4.2.1.1	Carbonic anhydrase [Macleaya cordata]	NA	317.845	350.625	585.62	47.2973	80.3818	72.3122	503.96	788.342	814.173	1.21233e-18	3.04415e-17	yes
gene-GIB67_006345	GIB67_006345	4148	rna-gnl|WGS:JACGCM|KingUnif24395.1	GO:0005524(ATP binding);GO:0005739(mitochondrion);GO:0006952(defense response);GO:0043531(ADP binding)	04626(Plant-pathogen interaction)	K13459	NA	hypothetical protein AQUCO_06300037v1 [Aquilegia coerulea]	NA	1.23063	2.02501	1.09034	9.71141	14.1295	11.1729	3.07997	1.9775	2.16913	1.2371e-18	3.10254e-17	yes
gene-GIB67_023526	GIB67_023526	988	rna-gnl|WGS:JACGCM|KingUnif33605.1	NA	NA	NA	NA		NA	0	0	0	5.12539	3.88154	2.92834	0.19532	0.092508	0	1.27939e-18	3.20471e-17	yes
gene-GIB67_023342	GIB67_023342	34818	rna-gnl|WGS:JACGCM|KingUnif20176.1	GO:0004674(protein serine/threonine kinase activity);GO:0005886(plasma membrane);GO:0006468(protein phosphorylation)	NA	NA	NA	hypothetical protein AQUCO_02400126v1 [Aquilegia coerulea]	NA	2.78927	4.17938	3.37833	1.47412	1.59688	3.05096	18.2954	16.8277	14.9167	1.29068e-18	3.22905e-17	yes
gene-GIB67_020257	GIB67_020257	3106	rna-gnl|WGS:JACGCM|KingUnif38018.1	GO:0009813(flavonoid biosynthetic process);GO:0043231(intracellular membrane-bounded organelle);GO:0052696(flavonoid glucuronidation);GO:0080043(quercetin 3-O-glucosyltransferase activity);GO:0080044(quercetin 7-O-glucosyltransferase activity)	NA	NA	NA	UDP-glycosyltransferase 85K10 [Camellia sinensis]	NA	4.86694	2.78221	4.67612	24.4732	20.4944	35.8753	5.31097	6.41917	3.62306	1.35476e-18	3.38525e-17	yes
gene-GIB67_003558	GIB67_003558	23825	rna-gnl|WGS:JACGCM|KingUnif21587.1	GO:0004674(protein serine/threonine kinase activity);GO:0005515(protein binding);GO:0005524(ATP binding);GO:0005634(nucleus);GO:0005886(plasma membrane);GO:0006468(protein phosphorylation);GO:0009506(plasmodesma);GO:0009755(hormone-mediated signaling pathway);GO:0010183(pollen tube guidance);GO:0016020(membrane);GO:0016021(integral component of membrane);GO:0016301(kinase activity);GO:0090406(pol…	NA	NA	NA	putative leucine-rich repeat receptor-like protein kinase [Cinnamomum micranthum f. kanehirae]	NA	0.255306	0.165396	0.458898	4.5729	4.25846	5.15305	0.951743	0.521075	0.453022	1.4028e-18	3.50105e-17	yes
gene-GIB67_028896	GIB67_028896	31370	rna-gnl|WGS:JACGCM|KingUnif31707.1	GO:0005886(plasma membrane);GO:0016301(kinase activity);GO:0016310(phosphorylation)	NA	NA	NA	hypothetical protein AQUCO_04100057v1 [Aquilegia coerulea]	NA	2.44864	3.50217	2.84618	18.3222	22.3378	21.1203	8.60256	5.89504	6.56041	1.44519e-18	3.60113e-17	yes
gene-GIB67_041060	GIB67_041060	34071	rna-gnl|WGS:JACGCM|KingUnif03042.1	GO:0003674(molecular_function);GO:0005739(mitochondrion);GO:0005886(plasma membrane);GO:0008150(biological_process);GO:0016021(integral component of membrane)	NA	NA	NA	uncharacterized protein LOC105649071 [Jatropha curcas]	NA	4.34572	3.42056	2.93827	6.49301	8.83084	6.55123	38.6731	78.5968	19.1741	1.44641e-18	3.60113e-17	yes
gene-GIB67_037555	GIB67_037555	12816	rna-gnl|WGS:JACGCM|KingUnif38883.1	GO:0000287(magnesium ion binding);GO:0004427(inorganic diphosphatase activity);GO:0005737(cytoplasm);GO:0005829(cytosol);GO:0006796(phosphate-containing compound metabolic process);GO:0016020(membrane);GO:0046686(response to cadmium ion)	00190(Oxidative phosphorylation)	K01507	EC:3.6.1.1	Soluble inorganic pyrophosphatase 4 [Vitis vinifera]	NA	74.46	68.4649	103.161	855.889	352.422	662.301	122.391	156.419	142.198	1.50004e-18	3.73015e-17	yes
gene-GIB67_021360	GIB67_021360	24443	rna-gnl|WGS:JACGCM|KingUnif24269.1	NA	NA	NA	NA	late embryogenesis abundant protein 2-like [Quercus suber]	NA	34.0494	14.5792	19.9387	45.5154	34.0882	34.2838	3.0793	1.14345	2.55146	1.50235e-18	3.73139e-17	yes
gene-GIB67_025665	GIB67_025665	38280	rna-gnl|WGS:JACGCM|KingUnif39420.1	GO:0004081(bis(5'-nucleosyl)-tetraphosphatase (asymmetrical) activity);GO:0006753(nucleoside phosphate metabolic process);GO:0008893(guanosine-3',5'-bis(diphosphate) 3'-diphosphatase activity);GO:0009507(chloroplast);GO:0015967(diadenosine tetraphosphate catabolic process);GO:0046872(metal ion binding)	NA	NA	NA	PREDICTED: nudix hydrolase 25 isoform X1 [Nelumbo nucifera]	NA	12.0305	28.5877	18.2565	109.74	91.5126	100.028	21.4697	24.3103	19.8413	1.50808e-18	3.7411e-17	yes
gene-GIB67_042432	GIB67_042432	26122	rna-gnl|WGS:JACGCM|KingUnif25822.1	GO:0009507(chloroplast);GO:0015996(chlorophyll catabolic process);GO:0080124(pheophytinase activity)	NA	NA	NA	hypothetical protein BVC80_243g48 [Macleaya cordata]	NA	59.4494	46.6716	75.7077	385.621	283.911	507.078	149.724	123.272	118.984	1.55066e-18	3.84209e-17	yes
gene-GIB67_021719	GIB67_021719	33518	rna-gnl|WGS:JACGCM|KingUnif40548.1	NA	03040(Spliceosome)	K12862	NA	WD40 repeat [Macleaya cordata]	NA	1.75166	1.37777	1.21908	0.011835	0.038444	0.043656	0.703786	0.560579	0.856527	1.55304e-18	3.84335e-17	yes
gene-GIB67_035191	GIB67_035191	36469	rna-gnl|WGS:JACGCM|KingUnif37967.1	GO:0003677(DNA binding);GO:0003700(DNA binding transcription factor activity);GO:0005515(protein binding);GO:0005634(nucleus);GO:0005737(cytoplasm);GO:0006351(transcription, DNA-templated);GO:0006355(regulation of transcription, DNA-templated);GO:0034605(cellular response to heat);GO:0043565(sequence-specific DNA binding);GO:0046686(response to cadmium ion)	NA	NA	NA	heat stress transcription factor B-3-like isoform X1 [Quercus suber]	NA	1.96246	2.35247	5.22771	47.906	49.1552	87.8623	53.1952	34.4732	19.4743	1.56029e-18	3.85665e-17	yes
gene-GIB67_004639	GIB67_004639	24401	rna-gnl|WGS:JACGCM|KingUnif36876.1	GO:0005794(Golgi apparatus);GO:0016413(O-acetyltransferase activity);GO:0071554(cell wall organization or biogenesis)	NA	NA	NA	PREDICTED: protein trichome birefringence-like 38 [Eucalyptus grandis]	NA	12.2842	5.83287	19.5962	0.255444	0.092542	0	2.31843	1.85031	2.65842	1.63092e-18	4.02639e-17	yes
gene-GIB67_041183	GIB67_041183	34185	rna-gnl|WGS:JACGCM|KingUnif24724.1	GO:0005215(transporter activity);GO:0005345(purine nucleobase transmembrane transporter activity);GO:0006863(purine nucleobase transport);GO:0015853(adenine transport);GO:0015854(guanine transport);GO:0016020(membrane);GO:0016021(integral component of membrane);GO:0022857(transmembrane transporter activity)	NA	NA	NA	hypothetical protein AQUCO_00500161v1 [Aquilegia coerulea]	NA	6.7124	2.168	5.94434	73.1177	30.604	94.5032	14.9491	14.7057	11.3334	1.64489e-18	4.05601e-17	yes
gene-GIB67_010131	GIB67_010131	12895	rna-gnl|WGS:JACGCM|KingUnif39554.1	GO:0003674(molecular_function);GO:0005634(nucleus);GO:0008150(biological_process)	NA	NA	NA	hypothetical protein COLO4_26386 [Corchorus olitorius]	NA	0.275865	0.270334	0.325044	3.85506	3.25017	8.44665	0.386734	0.392017	0.458292	1.86179e-18	4.58536e-17	yes
gene-GIB67_041352	GIB67_041352	10163	rna-gnl|WGS:JACGCM|KingUnif02059.1	GO:0004672(protein kinase activity);GO:0004674(protein serine/threonine kinase activity);GO:0005524(ATP binding);GO:0005886(plasma membrane);GO:0006468(protein phosphorylation);GO:0016021(integral component of membrane);GO:0016301(kinase activity);GO:0030246(carbohydrate binding)	NA	NA	NA	Protein kinase domain [Macleaya cordata]	NA	0.729035	1.16558	0.520796	11.538	22.4684	24.6872	6.56846	1.49267	3.12877	1.96176e-18	4.82579e-17	yes
gene-GIB67_031689	GIB67_031689	9662	rna-gnl|WGS:JACGCM|KingUnif42628.1	GO:0005634(nucleus);GO:0005641(nuclear envelope lumen);GO:0005654(nucleoplasm);GO:0005737(cytoplasm);GO:0005829(cytosol);GO:0007507(heart development);GO:0007568(aging);GO:0019005(SCF ubiquitin ligase complex);GO:0019219(regulation of nucleobase-containing compound metabolic process);GO:0019904(protein domain specific binding);GO:0030877(beta-catenin destruction complex);GO:0031625(ubiquitin prot…	NA	NA	NA	PREDICTED: calcyclin-binding protein-like [Nelumbo nucifera]	NA	129.793	169.8	116.842	31.2318	30.8511	26.0447	58.8867	61.1582	48.6571	1.98463e-18	4.87621e-17	yes
gene-GIB67_040990	GIB67_040990	12434	rna-gnl|WGS:JACGCM|KingUnif36823.1	GO:0004674(protein serine/threonine kinase activity);GO:0005524(ATP binding);GO:0005886(plasma membrane);GO:0016301(kinase activity);GO:0016787(hydrolase activity);GO:0046777(protein autophosphorylation)	NA	NA	NA	Protein kinase domain [Macleaya cordata]	NA	8.95735	6.08884	11.6736	42.2144	47.8693	49.5211	13.294	16.5667	15.6563	2.18437e-18	5.36057e-17	yes
gene-GIB67_033108	GIB67_033108	17340	rna-gnl|WGS:JACGCM|KingUnif12456.1	GO:0051213(dioxygenase activity)	00941(Flavonoid biosynthesis)	K00475	EC:1.14.11.9	hypothetical protein AQUCO_00600285v1 [Aquilegia coerulea]	NA	3.19686	2.67457	4.64344	11.8446	9.09328	7.97763	33.941	20.972	34.1066	2.33143e-18	5.71463e-17	yes
gene-GIB67_017118	GIB67_017118	12345	rna-gnl|WGS:JACGCM|KingUnif23766.1	GO:0046658(anchored component of plasma membrane)	NA	NA	NA	Plastocyanin-like [Macleaya cordata]	NA	206.047	91.3612	69.2135	16.9745	8.97863	13.4518	23.2963	26.7445	32.7317	2.37544e-18	5.81559e-17	yes
gene-GIB67_039672	GIB67_039672	31812	rna-gnl|WGS:JACGCM|KingUnif09246.1	GO:0016020(membrane);GO:0016709(oxidoreductase activity, acting on paired donors, with incorporation or reduction of molecular oxygen, NAD(P)H as one donor, and incorporation of one atom of oxygen);GO:0044550(secondary metabolite biosynthetic process)	00590(Arachidonic acid metabolism);00591(Linoleic acid metabolism)	K07418	EC:1.14.14.1;EC:1.14.14.73	putative cytochrome P450 monooxygenase [Actaea racemosa]	NA	1.46531	0.192054	1.96457	31.1504	40.039	43.9751	5.94955	6.04488	2.4297	2.40625e-18	5.88401e-17	yes
gene-GIB67_042925	GIB67_042925	3458	rna-gnl|WGS:JACGCM|KingUnif21410.1	GO:0003954(NADH dehydrogenase activity);GO:0005768(endosome);GO:0005794(Golgi apparatus);GO:0005802(trans-Golgi network);GO:0005886(plasma membrane);GO:0016021(integral component of membrane);GO:0051536(iron-sulfur cluster binding)	NA	NA	NA	PREDICTED: CASP-like protein 1D1 [Nelumbo nucifera]	NA	4.79132	6.2486	4.61192	27.6347	48.9688	25.913	116.402	44.3193	50.4533	2.41125e-18	5.88923e-17	yes
gene-GIB67_037898	GIB67_037898	35188	rna-gnl|WGS:JACGCM|KingUnif36780.1	GO:0003674(molecular_function);GO:0005739(mitochondrion);GO:0005819(spindle);GO:0005874(microtubule);GO:0032147(activation of protein kinase activity);GO:0060236(regulation of mitotic spindle organization)	NA	NA	NA	hypothetical protein AQUCO_03600092v1 [Aquilegia coerulea]	NA	3.342	9.35202	2.05294	0.120702	0.080793	0.033093	0.584372	1.05728	0.93487	2.54669e-18	6.21266e-17	yes
gene-GIB67_016063	GIB67_016063	40569	rna-gnl|WGS:JACGCM|KingUnif08644.1	GO:0009416(response to light stimulus);GO:0009535(chloroplast thylakoid membrane);GO:0009768(photosynthesis, light harvesting in photosystem I);GO:0009941(chloroplast envelope);GO:0010287(plastoglobule);GO:0016168(chlorophyll binding);GO:0031409(pigment binding)	00196(Photosynthesis - antenna proteins)	K08912	NA	uncharacterized protein LOC112184868 [Rosa chinensis]	NA	741.395	897.149	1205.43	99.5388	190.712	90.9971	122.688	167.19	54.9344	2.67008e-18	6.50595e-17	yes
gene-GIB67_023336	GIB67_023336	34810	rna-gnl|WGS:JACGCM|KingUnif40109.1	GO:0003677(DNA binding);GO:0005515(protein binding);GO:0005634(nucleus);GO:0005677(chromatin silencing complex);GO:0006351(transcription, DNA-templated);GO:0006355(regulation of transcription, DNA-templated);GO:0009409(response to cold);GO:0009506(plasmodesma);GO:0009908(flower development);GO:0010228(vegetative to reproductive phase transition of meristem);GO:0031519(PcG protein complex);GO:0032…	NA	NA	NA	PREDICTED: VIN3-like protein 2 isoform X2 [Nelumbo nucifera]	NA	12.1441	8.88503	12.2542	59.297	41.5571	52.7051	13.5291	19.3566	14.0208	2.98358e-18	7.26121e-17	yes
gene-GIB67_027849	GIB67_027849	2819	rna-gnl|WGS:JACGCM|KingUnif37818.1	GO:0005886(plasma membrane);GO:0015079(potassium ion transmembrane transporter activity)	NA	NA	NA	uncharacterized protein LOC107414004 [Ziziphus jujuba]	NA	8.34992	7.42691	14.8066	43.0907	56.743	47.1551	6.11561	8.38237	8.20387	3.36089e-18	8.16981e-17	yes
gene-GIB67_006963	GIB67_006963	4629	rna-gnl|WGS:JACGCM|KingUnif36866.1	GO:0003677(DNA binding);GO:0003723(RNA binding);GO:0005739(mitochondrion);GO:0008150(biological_process)	NA	NA	NA	hypothetical protein AQUCO_00400777v1 [Aquilegia coerulea]	NA	16.5004	14.9322	9.81264	7.82847	10.8164	7.1193	45.3035	41.5936	42.845	3.52015e-18	8.54686e-17	yes
gene-GIB67_002181	GIB67_002181	42393	rna-gnl|WGS:JACGCM|KingUnif35225.1	NA	NA	NA	NA		NA	1.10239	1.31641	0.612358	17.7533	22.7524	14.5942	14.934	19.0343	24.2721	3.75779e-18	9.11169e-17	yes
gene-GIB67_001769	GIB67_001769	37092	rna-gnl|WGS:JACGCM|KingUnif08380.1	GO:0009813(flavonoid biosynthetic process);GO:0043231(intracellular membrane-bounded organelle);GO:0052696(flavonoid glucuronidation);GO:0080043(quercetin 3-O-glucosyltransferase activity);GO:0080044(quercetin 7-O-glucosyltransferase activity)	NA	NA	NA	PREDICTED: UDP-glycosyltransferase 89B2-like [Nelumbo nucifera]	NA	3.86546	4.72677	11.7045	110.175	128.278	90.4142	50.3607	24.7995	18.0205	3.76165e-18	9.11169e-17	yes
gene-GIB67_015241	GIB67_015241	19250	rna-gnl|WGS:JACGCM|KingUnif30830.1	GO:0004672(protein kinase activity);GO:0004674(protein serine/threonine kinase activity);GO:0005515(protein binding);GO:0005524(ATP binding);GO:0005886(plasma membrane);GO:0006468(protein phosphorylation);GO:0007169(transmembrane receptor protein tyrosine kinase signaling pathway);GO:0009934(regulation of meristem structural organization);GO:0010075(regulation of meristem growth);GO:0010480(micro…	NA	NA	NA	hypothetical protein AQUCO_01000010v1 [Aquilegia coerulea]	NA	17.2979	7.32188	5.6834	0.594543	1.17353	0.635308	9.77936	15.2583	9.92814	3.78957e-18	9.16852e-17	yes
gene-GIB67_009055	GIB67_009055	1809	rna-gnl|WGS:JACGCM|KingUnif20220.1	GO:0005886(plasma membrane);GO:0008150(biological_process);GO:0030246(carbohydrate binding)	NA	NA	NA	epidermis-specific secreted glycoprotein EP1-like protein [Cinnamomum micranthum f. kanehirae]	NA	0.114317	0	0.256205	19.49	12.7333	23.2672	1.69877	7.63035	2.11064	3.79528e-18	9.17156e-17	yes
gene-GIB67_009535	GIB67_009535	5792	rna-gnl|WGS:JACGCM|KingUnif11723.1	GO:0005274(allantoin:proton symporter activity);GO:0005524(ATP binding);GO:0005886(plasma membrane);GO:0015210(uracil transmembrane transporter activity);GO:0015505(uracil:cation symporter activity);GO:0015720(allantoin transport);GO:0015857(uracil transport);GO:0016021(integral component of membrane);GO:0022857(transmembrane transporter activity);GO:0043100(pyrimidine nucleobase salvage);GO:0071…	NA	NA	NA	PREDICTED: ureide permease 2-like isoform X2 [Nelumbo nucifera]	NA	11.1219	12.5269	17.3116	69.5792	64.4932	75.578	34.8587	31.2603	30.9012	3.80812e-18	9.19178e-17	yes
gene-GIB67_006667	GIB67_006667	37458	rna-gnl|WGS:JACGCM|KingUnif40964.1	GO:0005275(amine transmembrane transporter activity);GO:0005886(plasma membrane);GO:0006865(amino acid transport);GO:0009507(chloroplast);GO:0009706(chloroplast inner membrane);GO:0015173(aromatic amino acid transmembrane transporter activity);GO:0015801(aromatic amino acid transport);GO:0016020(membrane)	NA	NA	NA	Tyrosine-specific transport protein [Actinidia chinensis var. chinensis]	NA	3.40009	1.31654	2.85545	12.4242	21.0023	18.8552	0.556178	1.28483	1.92048	3.88466e-18	9.36555e-17	yes
gene-GIB67_027035	GIB67_027035	3821	rna-gnl|WGS:JACGCM|KingUnif06048.1	GO:0003689(DNA clamp loader activity);GO:0005663(DNA replication factor C complex);GO:0006261(DNA-dependent DNA replication)	NA	NA	NA	hypothetical protein AQUCO_03900041v1 [Aquilegia coerulea]	NA	0.244069	0.159553	0.231112	4.13257	3.3256	4.35018	0.950354	0.659946	1.62045	3.91231e-18	9.42116e-17	yes
gene-GIB67_036838	GIB67_036838	30230	rna-gnl|WGS:JACGCM|KingUnif31259.1	GO:0003674(molecular_function);GO:0005886(plasma membrane);GO:0008150(biological_process);GO:0016021(integral component of membrane)	NA	NA	NA	protein PLANT CADMIUM RESISTANCE 4-like [Cynara cardunculus var. scolymus]	NA	0.76823	0.462027	1.09219	9.38889	11.7658	17.182	3.7825	2.59746	3.21676	4.00686e-18	9.63754e-17	yes
gene-GIB67_012495	GIB67_012495	18360	rna-gnl|WGS:JACGCM|KingUnif09528.1	NA	NA	NA	NA	hypothetical protein AQUCO_01100204v1 [Aquilegia coerulea]	NA	210.257	245.696	217.45	1040.41	1186.82	1077.23	244.089	223.248	236.139	4.20367e-18	1.00991e-16	yes
gene-GIB67_037543	GIB67_037543	12832	rna-gnl|WGS:JACGCM|KingUnif32200.1	GO:0016020(membrane);GO:0016709(oxidoreductase activity, acting on paired donors, with incorporation or reduction of molecular oxygen, NAD(P)H as one donor, and incorporation of one atom of oxygen);GO:0044550(secondary metabolite biosynthetic process)	00905(Brassinosteroid biosynthesis)	K20623	NA	Cytochrome P450 [Macleaya cordata]	NA	3.45858	2.5581	5.77361	28.0356	36.9034	35.3299	34.7755	24.8064	18.5373	4.26429e-18	1.02328e-16	yes
gene-GIB67_035555	GIB67_035555	36631	rna-gnl|WGS:JACGCM|KingUnif16203.1	GO:0004497(monooxygenase activity)	NA	NA	NA	Cytochrome P450 [Macleaya cordata]	NA	3.19149	0.854467	4.67424	44.3401	70.6651	38.0522	39.0728	46.9602	46.2552	4.30442e-18	1.03171e-16	yes
gene-GIB67_043192	GIB67_043192	9909	rna-gnl|WGS:JACGCM|KingUnif13952.1	GO:0003729(mRNA binding);GO:0003730(mRNA 3'-UTR binding);GO:0005515(protein binding);GO:0005634(nucleus);GO:0005829(cytosol);GO:0006397(mRNA processing)	NA	NA	NA	oligouridylate-binding protein 1-like [Papaver somniferum]	NA	9.54535	7.51062	10.1465	8.26238	8.50151	9.42669	31.0907	35.4538	29.4105	4.36212e-18	1.04432e-16	yes
gene-GIB67_024600	GIB67_024600	32840	rna-gnl|WGS:JACGCM|KingUnif31021.1	GO:0005634(nucleus);GO:0005829(cytosol);GO:0005983(starch catabolic process);GO:0009414(response to water deprivation);GO:0009507(chloroplast);GO:0016161(beta-amylase activity);GO:0102229(amylopectin maltohydrolase activity)	00500(Starch and sucrose metabolism)	K01177	EC:3.2.1.2	Glycoside hydrolase [Macleaya cordata]	NA	97.2473	80.7575	109.758	724.93	577.701	843.662	262.829	251.263	226.947	4.43859e-18	1.06139e-16	yes
gene-GIB67_004289	GIB67_004289	19675	rna-gnl|WGS:JACGCM|KingUnif07712.1	GO:0008194(UDP-glycosyltransferase activity);GO:0009813(flavonoid biosynthetic process);GO:0043231(intracellular membrane-bounded organelle);GO:0052696(flavonoid glucuronidation)	NA	NA	NA	UDP-glucuronosyl/UDP-glucosyltransferase [Macleaya cordata]	NA	10.6098	9.49595	10.3908	20.2812	20.1323	17.3129	54.0244	39.6368	45.6166	4.45162e-18	1.06327e-16	yes
gene-GIB67_028866	GIB67_028866	31335	rna-gnl|WGS:JACGCM|KingUnif01467.1	GO:0005313(L-glutamate transmembrane transporter activity);GO:0005887(integral component of plasma membrane);GO:0015180(L-alanine transmembrane transporter activity);GO:0015181(arginine transmembrane transporter activity);GO:0015185(gamma-aminobutyric acid transmembrane transporter activity);GO:0015189(L-lysine transmembrane transporter activity);GO:0015297(antiporter activity);GO:0015812(gamma-a…	NA	NA	NA	PREDICTED: amino-acid permease BAT1 homolog isoform X1 [Nelumbo nucifera]	NA	4.24376	3.14827	4.72746	30.3675	28.2381	29.0327	14.6647	16.3641	10.3987	4.47233e-18	1.06692e-16	yes
gene-GIB67_037261	GIB67_037261	19538	rna-gnl|WGS:JACGCM|KingUnif29947.1	GO:0003700(DNA binding transcription factor activity);GO:0005634(nucleus);GO:0006355(regulation of transcription, DNA-templated);GO:0043565(sequence-specific DNA binding)	NA	NA	NA	PREDICTED: scarecrow-like protein 8 [Nelumbo nucifera]	NA	12.9516	7.74315	8.79078	84.5669	51.4247	71.214	28.6638	36.9323	20.3703	4.47728e-18	1.06692e-16	yes
gene-GIB67_005333	GIB67_005333	12194	rna-gnl|WGS:JACGCM|KingUnif35958.1	GO:0003674(molecular_function);GO:0005634(nucleus);GO:0009506(plasmodesma);GO:0009736(cytokinin-activated signaling pathway);GO:0010540(basipetal auxin transport);GO:0010541(acropetal auxin transport);GO:0016567(protein ubiquitination)	NA	NA	NA	F-box domain [Macleaya cordata]	NA	0.872779	0.404083	2.22455	26.8031	20.7676	36.5081	9.79028	10.4804	9.15726	4.54978e-18	1.08294e-16	yes
gene-GIB67_034953	GIB67_034953	10791	rna-gnl|WGS:JACGCM|KingUnif41758.1	GO:0004672(protein kinase activity);GO:0004675(transmembrane receptor protein serine/threonine kinase activity);GO:0005524(ATP binding);GO:0005576(extracellular region);GO:0005794(Golgi apparatus);GO:0005829(cytosol);GO:0005886(plasma membrane);GO:0006468(protein phosphorylation);GO:0007166(cell surface receptor signaling pathway);GO:0009506(plasmodesma);GO:0016021(integral component of membrane)	NA	NA	NA	Protein kinase domain [Macleaya cordata]	NA	1.08686	0.617566	0.757679	8.25916	5.6506	8.5058	2.18488	1.53153	1.70645	4.64404e-18	1.1041e-16	yes
gene-GIB67_025363	GIB67_025363	12732	rna-gnl|WGS:JACGCM|KingUnif29002.1	GO:0004674(protein serine/threonine kinase activity);GO:0005886(plasma membrane);GO:0006468(protein phosphorylation)	NA	NA	NA	PREDICTED: probable receptor-like protein kinase At5g20050 [Vitis vinifera]	NA	2.3498	1.69223	1.43947	17.0038	14.2575	23.8768	6.59333	5.55946	3.69934	4.84685e-18	1.15099e-16	yes
gene-GIB67_036899	GIB67_036899	5866	rna-gnl|WGS:JACGCM|KingUnif05919.1	GO:0003674(molecular_function);GO:0005886(plasma membrane);GO:0008150(biological_process);GO:0009507(chloroplast)	NA	NA	NA	Protein of unknown function DUF868 [Macleaya cordata]	NA	1.70699	1.75072	2.99181	23.684	15.7607	39.9052	9.35834	8.80851	8.22707	4.93201e-18	1.16986e-16	yes
gene-GIB67_023988	GIB67_023988	36208	rna-gnl|WGS:JACGCM|KingUnif10877.1	GO:0004674(protein serine/threonine kinase activity);GO:0005515(protein binding);GO:0005524(ATP binding);GO:0005634(nucleus);GO:0005886(plasma membrane);GO:0006468(protein phosphorylation);GO:0009506(plasmodesma);GO:0009755(hormone-mediated signaling pathway);GO:0010183(pollen tube guidance);GO:0016020(membrane);GO:0016021(integral component of membrane);GO:0016301(kinase activity);GO:0090406(pol…	NA	NA	NA	putative LRR receptor-like serine/threonine-protein kinase [Cinnamomum micranthum f. kanehirae]	NA	0.285587	0.165207	0.396915	4.34443	4.81202	5.29607	1.0528	0.280869	0.368693	5.05082e-18	1.19666e-16	yes
gene-GIB67_024296	GIB67_024296	35869	rna-gnl|WGS:JACGCM|KingUnif27670.1	GO:0003746(translation elongation factor activity);GO:0005634(nucleus);GO:0006414(translational elongation)	NA	NA	NA	PREDICTED: uncharacterized protein LOC105801820 [Gossypium raimondii]	NA	1.22658	3.47763	2.44961	2.0567	6.44763	4.72746	0	0	0	5.12757e-18	1.21298e-16	yes
gene-GIB67_006074	GIB67_006074	32505	rna-gnl|WGS:JACGCM|KingUnif00261.1	GO:0003674(molecular_function);GO:0008150(biological_process)	NA	NA	NA	uncharacterized protein At4g22758 [Prunus persica]	NA	73.9835	62.8492	39.0621	283.116	208.088	344.905	42.0608	64.8106	53.5625	5.13149e-18	1.21298e-16	yes
gene-GIB67_038325	GIB67_038325	43160	rna-gnl|WGS:JACGCM|KingUnif18029.1	GO:0000902(cell morphogenesis)	NA	NA	NA	hypothetical protein BVC80_1837g137 [Macleaya cordata]	NA	32.8139	11.4947	30.7135	2.43125	1.6987	0.837539	15.6536	30.3076	21.2156	5.20255e-18	1.22836e-16	yes
gene-GIB67_023520	GIB67_023520	983	rna-gnl|WGS:JACGCM|KingUnif35574.1	GO:0016020(membrane);GO:0016709(oxidoreductase activity, acting on paired donors, with incorporation or reduction of molecular oxygen, NAD(P)H as one donor, and incorporation of one atom of oxygen);GO:0042343(indole glucosinolate metabolic process);GO:0044550(secondary metabolite biosynthetic process);GO:0098542(defense response to other organism)	NA	NA	NA	hypothetical protein AQUCO_00700787v1 [Aquilegia coerulea]	NA	0.508264	0.328153	0.439615	9.09454	4.64732	4.69378	3.93757	3.9673	2.23631	5.28129e-18	1.24552e-16	yes
[truncated: 29,793 more rows]
