# Supplementary material for: Insights into the Adaptation to High Altitudes from Transcriptome Profiling: A Case Study of an Endangered Species, Kingdonia uniflora
Source: Genes (Basel). 2023 Jun 19;14(6):1291. doi: 10.3390/genes14061291 (PMC10298588; doi:10.3390/genes14061291)
Supplement: Supplementary file 1 [file genes-14-01291-s001.zip › Supplemental Table S6.xlsx]

## Sheet: Sheet1
gene_id	gene_name	EntrezID	transcript_id	GO	KEGG	KO_ENTRY	EC	Description	trans_type	FPKM.D_1	FPKM.D_2	FPKM.D_3	FPKM.E_1	FPKM.E_2	FPKM.E_3	FPKM.F_1	FPKM.F_2	FPKM.F_3	pval	qval	significant
gene-GIB67_013473	GIB67_013473	32232	rna-gnl|WGS:JACGCM|KingUnif04711.1	GO:0005345(purine nucleobase transmembrane transporter activity);GO:0006863(purine nucleobase transport);GO:0009507(chloroplast);GO:0016020(membrane);GO:0016021(integral component of membrane)	00010(Glycolysis / Gluconeogenesis);00030(Pentose phosphate pathway);00051(Fructose and mannose metabolism);00052(Galactose metabolism);03018(RNA degradation)	K00850	EC:2.7.1.11	hypothetical protein AQUCO_01000091v1 [Aquilegia coerulea]	NA	101.003	90.2859	197.36	0.197071	0.842861	0.223197	0.284609	0.269583	0.572331	1.64358e-41	3.48192e-37	yes
gene-GIB67_015227	GIB67_015227	19237	rna-gnl|WGS:JACGCM|KingUnif09228.1	GO:0006855(drug transmembrane transport);GO:0017119(Golgi transport complex)	NA	NA	NA	Multi antimicrobial extrusion protein [Macleaya cordata]	NA	27.9603	55.0576	51.8785	1.13482	1.55405	1.03571	0.596892	0.325987	0.741207	1.17281e-30	1.2423e-26	yes
gene-GIB67_008500	GIB67_008500	35823	rna-gnl|WGS:JACGCM|KingUnif20436.1	GO:0003676(nucleic acid binding);GO:0004553(hydrolase activity, hydrolyzing O-glycosyl compounds);GO:0004857(enzyme inhibitor activity);GO:0005737(cytoplasm);GO:0005975(carbohydrate metabolic process);GO:0046872(metal ion binding);GO:0047274(galactinol-sucrose galactosyltransferase activity)	00052(Galactose metabolism)	K06617	EC:2.4.1.82	Cyclic nucleotide-binding domain [Macleaya cordata]	NA	0.11732	0.115968	0.064761	2.09492	3.57745	9.89876	74.014	36.9787	29.966	1.3198e-26	9.31999e-23	yes
gene-GIB67_026284	GIB67_026284	37819	rna-gnl|WGS:JACGCM|KingUnif38152.1	GO:0007165(signal transduction);GO:0016020(membrane)	NA	NA	NA	ankyrin repeat-containing protein-like [Dorcoceras hygrometricum]	NA	0	0	0	0.359643	0.477083	0.416003	11.4804	7.83703	9.11749	2.24301e-26	1.18796e-22	yes
gene-GIB67_014403	GIB67_014403	29279	rna-gnl|WGS:JACGCM|KingUnif10285.1	GO:0009813(flavonoid biosynthetic process);GO:0043231(intracellular membrane-bounded organelle);GO:0052696(flavonoid glucuronidation);GO:0080043(quercetin 3-O-glucosyltransferase activity);GO:0080044(quercetin 7-O-glucosyltransferase activity)	00906(Carotenoid biosynthesis)	K14595	EC:2.4.1.263	UDP-glucuronosyl/UDP-glucosyltransferase [Macleaya cordata]	NA	0.024869	0.069985	0.036724	149.139	275.667	33.0111	66.2696	70.9176	29.16	6.44507e-26	2.73078e-22	yes
gene-GIB67_020225	GIB67_020225	3073	rna-gnl|WGS:JACGCM|KingUnif28602.1	GO:0004601(peroxidase activity);GO:0005515(protein binding);GO:0005576(extracellular region);GO:0005618(cell wall);GO:0005794(Golgi apparatus);GO:0005829(cytosol);GO:0006979(response to oxidative stress);GO:0009809(lignin biosynthetic process);GO:0010089(xylem development);GO:0020037(heme binding);GO:0042744(hydrogen peroxide catabolic process);GO:0046872(metal ion binding);GO:0048046(apoplast);G…	00940(Phenylpropanoid biosynthesis)	K00430	EC:1.11.1.7	Peroxidase 68 [Cinnamomum micranthum f. kanehirae]	NA	0	0.037794	0.05311	4.6773	18.2093	19.0026	114.458	80.4376	29.5165	9.96976e-26	3.52016e-22	yes
gene-GIB67_003757	GIB67_003757	19354	rna-gnl|WGS:JACGCM|KingUnif25319.1	NA	NA	NA	NA	water deficit inducible LP3-like protein, partial [Pseudotsuga menziesii var. menziesii]	NA	48.9986	99.4589	49.3277	0.289554	0.127002	0.583359	0	0.200375	0.471953	1.36395e-25	4.12789e-22	yes
gene-GIB67_043206	GIB67_043206	9920	rna-gnl|WGS:JACGCM|KingUnif26296.1	GO:0004497(monooxygenase activity);GO:0007275(multicellular organism development);GO:0010268(brassinosteroid homeostasis);GO:0016125(sterol metabolic process);GO:0016132(brassinosteroid biosynthetic process)	NA	NA	NA	hypothetical protein AQUCO_04500214v1 [Aquilegia coerulea]	NA	0.04366	0.030183	0	4.81177	16.3189	22.9368	29.661	26.9913	44.2169	5.42527e-25	1.43668e-21	yes
gene-GIB67_000981	GIB67_000981	23383	rna-gnl|WGS:JACGCM|KingUnif12788.1	NA	NA	NA	NA	hypothetical protein BVC80_1663g33 [Macleaya cordata]	NA	38.0655	28.2119	25.2054	0.077571	0	0.118907	1.68691	0.9062	1.63483	5.85001e-24	1.37703e-20	yes
gene-GIB67_023368	GIB67_023368	34839	rna-gnl|WGS:JACGCM|KingUnif08778.1	GO:0004601(peroxidase activity);GO:0005576(extracellular region);GO:0006979(response to oxidative stress);GO:0020037(heme binding);GO:0042744(hydrogen peroxide catabolic process);GO:0046872(metal ion binding);GO:0055114(oxidation-reduction process)	00940(Phenylpropanoid biosynthesis)	K00430	EC:1.11.1.7	peroxidase 45-like [Quercus suber]	NA	1.03783	0.74023	0.517756	2.25654	8.53859	17.3003	133.874	109.475	203.832	1.31835e-23	2.79292e-20	yes
gene-GIB67_041363	GIB67_041363	10177	rna-gnl|WGS:JACGCM|KingUnif05648.1	GO:0009813(flavonoid biosynthetic process);GO:0043231(intracellular membrane-bounded organelle);GO:0052696(flavonoid glucuronidation);GO:0080043(quercetin 3-O-glucosyltransferase activity);GO:0080044(quercetin 7-O-glucosyltransferase activity)	00906(Carotenoid biosynthesis)	K14595	EC:2.4.1.263	UDP-glucuronosyl/UDP-glucosyltransferase [Macleaya cordata]	NA	0.035724	0.039875	0	68.9694	89.7235	13.1035	29.6724	29.115	10.269	2.20982e-23	4.25592e-20	yes
gene-GIB67_017826	GIB67_017826	20542	rna-gnl|WGS:JACGCM|KingUnif21699.1	GO:0046658(anchored component of plasma membrane)	NA	NA	NA	hypothetical protein CDL15_Pgr014092 [Punica granatum]	NA	1.5078	2.32942	3.74162	20.7761	44.823	19.2846	152.047	241.438	303.661	2.64877e-23	4.67618e-20	yes
gene-GIB67_005669	GIB67_005669	10431	rna-gnl|WGS:JACGCM|KingUnif14486.1	GO:0005345(purine nucleobase transmembrane transporter activity);GO:0006863(purine nucleobase transport);GO:0009507(chloroplast);GO:0016020(membrane);GO:0016021(integral component of membrane)	00010(Glycolysis / Gluconeogenesis);00030(Pentose phosphate pathway);00051(Fructose and mannose metabolism);00052(Galactose metabolism);03018(RNA degradation)	K00850	EC:2.7.1.11	hypothetical protein AQUCO_01000091v1 [Aquilegia coerulea]	NA	58.3797	169.419	125.993	2.04025	2.50906	2.81146	5.01903	8.48492	2.60721	6.07089e-23	9.89321e-20	yes
gene-GIB67_031292	GIB67_031292	2406	rna-gnl|WGS:JACGCM|KingUnif25903.1	NA	NA	NA	NA		NA	0.141492	0.171326	0	4.97565	5.97268	10.7841	72.0383	29.0405	158.593	6.95553e-23	1.05252e-19	yes
gene-GIB67_033685	GIB67_033685	2928	rna-gnl|WGS:JACGCM|KingUnif30668.1	GO:0004197(cysteine-type endopeptidase activity);GO:0005615(extracellular space);GO:0005764(lysosome);GO:0051603(proteolysis involved in cellular protein catabolic process)	NA	NA	NA	Peptidase C1A [Macleaya cordata]	NA	0.620224	0.153757	0.143177	4.45261	4.51136	10.7846	52.5457	58.7492	58.0501	5.97123e-22	8.22914e-19	yes
gene-GIB67_035449	GIB67_035449	4284	rna-gnl|WGS:JACGCM|KingUnif34083.1	GO:0005739(mitochondrion);GO:0005773(vacuole);GO:0005886(plasma membrane);GO:0009507(chloroplast);GO:0012505(endomembrane system);GO:0015098(molybdate ion transmembrane transporter activity);GO:0015116(sulfate transmembrane transporter activity);GO:0015689(molybdate ion transport);GO:0016021(integral component of membrane);GO:0031966(mitochondrial membrane)	NA	NA	NA	sulfate transporter [Macleaya cordata]	NA	17.5269	93.8195	62.5209	0.516148	2.71718	2.09965	0.609791	0.251304	0.266309	6.21507e-22	8.22914e-19	yes
gene-GIB67_033203	GIB67_033203	20377	rna-gnl|WGS:JACGCM|KingUnif32070.1	GO:0005737(cytoplasm);GO:0030001(metal ion transport);GO:0046914(transition metal ion binding);GO:0046916(cellular transition metal ion homeostasis)	NA	NA	NA	heavy metal-associated isoprenylated plant protein 30-like [Carica papaya]	NA	122.299	356.55	289.174	2.64351	3.19264	3.9304	10.4369	26.9334	9.70739	1.00242e-21	1.24919e-18	yes
gene-GIB67_005006	GIB67_005006	8742	rna-gnl|WGS:JACGCM|KingUnif37106.1	NA	NA	NA	NA		NA	0	0.119203	0	0	0	0	20.1061	20.8286	7.07547	7.83995e-21	9.22719e-18	yes
gene-GIB67_039951	GIB67_039951	3319	rna-gnl|WGS:JACGCM|KingUnif30043.1	GO:0004864(protein phosphatase inhibitor activity);GO:0005634(nucleus);GO:0005737(cytoplasm);GO:0009738(abscisic acid-activated signaling pathway);GO:0010427(abscisic acid binding);GO:0080163(regulation of protein serine/threonine phosphatase activity)	04016(MAPK signaling pathway - plant);04075(Plant hormone signal transduction)	K14496	NA	PREDICTED: abscisic acid receptor PYL12-like [Nelumbo nucifera]	NA	0.35365	1.34943	1.02874	49.8809	37.9561	42.768	0.491771	0.592404	0.123642	1.514e-20	1.68811e-17	yes
gene-GIB67_002742	GIB67_002742	15222	rna-gnl|WGS:JACGCM|KingUnif05645.1	GO:0003824(catalytic activity)	NA	NA	NA	PREDICTED: uncharacterized protein At5g48480 [Nelumbo nucifera]	NA	0.342845	0.437107	0.481281	433.402	3.35681	347.528	1.20247	0.613438	1.44547	1.69442e-20	1.79481e-17	yes
gene-GIB67_022640	GIB67_022640	1482	rna-gnl|WGS:JACGCM|KingUnif31735.1	GO:0005507(copper ion binding);GO:0009809(lignin biosynthetic process);GO:0016722(oxidoreductase activity, oxidizing metal ions)	NA	NA	NA	putative laccase-9 [Cinnamomum micranthum f. kanehirae]	NA	16.1393	184.643	117.566	0.470352	0.692865	0.735905	4.86866	9.33274	3.53394	5.54004e-20	5.58885e-17	yes
gene-GIB67_040246	GIB67_040246	18613	rna-gnl|WGS:JACGCM|KingUnif18705.1	GO:0005886(plasma membrane);GO:0006633(fatty acid biosynthetic process);GO:0070566(adenylyltransferase activity)	00061(Fatty acid biosynthesis)	K00665	EC:2.3.1.85	AMP-dependent synthetase/ligase [Macleaya cordata]	NA	0.032734	0.131866	0.053476	0.592176	0.677223	1.64427	8.42993	7.85862	7.09774	5.94085e-20	5.72077e-17	yes
gene-GIB67_038499	GIB67_038499	8153	rna-gnl|WGS:JACGCM|KingUnif30924.1	GO:0005802(trans-Golgi network);GO:0005886(plasma membrane)	04016(MAPK signaling pathway - plant);04075(Plant hormone signal transduction)	K14514	NA	PREDICTED: phosphate transporter PHO1 homolog 1 [Vitis vinifera]	NA	53.7684	88.5747	152.26	0.589559	1.8754	1.46357	4.21815	8.18411	2.04481	6.4822e-20	5.97067e-17	yes
gene-GIB67_028905	GIB67_028905	31362	rna-gnl|WGS:JACGCM|KingUnif03818.1	GO:0005576(extracellular region);GO:0006508(proteolysis);GO:0006869(lipid transport);GO:0008233(peptidase activity);GO:0008289(lipid binding)	NA	NA	NA	TED4 [Zinnia elegans]	NA	1.17527	0.141219	0.571984	24.7647	22.6318	40.6765	211.49	1574.72	107.908	9.95784e-20	8.78987e-17	yes
gene-GIB67_037600	GIB67_037600	31597	rna-gnl|WGS:JACGCM|KingUnif30764.1	GO:0035251(UDP-glucosyltransferase activity)	NA	NA	NA	UDP-glucuronosyl/UDP-glucosyltransferase [Macleaya cordata]	NA	0.299048	0.151773	0.127005	5.25613	6.7896	20.0078	37.6344	47.5614	24.3866	1.26252e-19	1.06986e-16	yes
gene-GIB67_042321	GIB67_042321	36379	rna-gnl|WGS:JACGCM|KingUnif13453.1	GO:0016020(membrane);GO:0016709(oxidoreductase activity, acting on paired donors, with incorporation or reduction of molecular oxygen, NAD(P)H as one donor, and incorporation of one atom of oxygen);GO:0044550(secondary metabolite biosynthetic process)	NA	NA	NA	Cytochrome P450 [Macleaya cordata]	NA	0	0	0	2.53704	7.33368	6.23665	26.9952	18.529	14.0047	1.67427e-19	1.3642e-16	yes
gene-GIB67_038496	GIB67_038496	8149	rna-gnl|WGS:JACGCM|KingUnif31280.1	GO:0005886(plasma membrane);GO:0016021(integral component of membrane);GO:0042626(ATPase activity, coupled to transmembrane movement of substances)	02010(ABC transporters)	K05681	NA	ABC transporter-like [Macleaya cordata]	NA	50.0718	133.747	236.899	8.04599	5.1878	3.53446	0.522141	1.92494	0.334754	2.46083e-19	1.93084e-16	yes
gene-GIB67_001084	GIB67_001084	23487	rna-gnl|WGS:JACGCM|KingUnif26264.1	GO:0047037(salutaridine reductase (NADPH) activity);GO:0050661(NADP binding);GO:0097295(morphine biosynthetic process)	00902(Monoterpenoid biosynthesis)	K15095	EC:1.1.1.208	hypothetical protein AQUCO_01300364v1 [Aquilegia coerulea]	NA	0	0.060491	0	11.0885	5.25249	11.8511	7.53777	42.7608	34.5378	3.55146e-19	2.68706e-16	yes
gene-GIB67_006225	GIB67_006225	2519	rna-gnl|WGS:JACGCM|KingUnif42876.1	GO:0005515(protein binding);GO:0005737(cytoplasm);GO:0005886(plasma membrane);GO:0006950(response to stress);GO:0016020(membrane);GO:0016787(hydrolase activity);GO:0043621(protein self-association)	NA	NA	NA	universal stress protein PHOS32 [Phoenix dactylifera]	NA	109.906	239.284	202.254	4.18615	6.72654	11.7933	7.83634	13.498	5.06847	4.05795e-19	2.9644e-16	yes
gene-GIB67_000937	GIB67_000937	23343	rna-gnl|WGS:JACGCM|KingUnif14234.1	GO:0005634(nucleus);GO:0005737(cytoplasm);GO:0008150(biological_process)	NA	NA	NA	PREDICTED: uncharacterized protein LOC18605980 [Theobroma cacao]	NA	0.049928	0	0	2.50478	2.34671	2.43348	23.6632	16.3761	24.5071	7.25502e-19	5.12325e-16	yes
gene-GIB67_012488	GIB67_012488	18349	rna-gnl|WGS:JACGCM|KingUnif04485.1	GO:0005515(protein binding);GO:0009507(chloroplast);GO:0010287(plastoglobule);GO:0016702(oxidoreductase activity, acting on single donors with incorporation of molecular oxygen, incorporation of two atoms of oxygen);GO:0046872(metal ion binding);GO:0055114(oxidation-reduction process)	00906(Carotenoid biosynthesis)	K09840	EC:1.13.11.51	probable carotenoid cleavage dioxygenase 4, chloroplastic [Citrus sinensis]	NA	8.05391	27.3313	134.466	0.910765	0.313701	0.70236	0.721196	0.851423	0.384072	8.39602e-19	5.73773e-16	yes
gene-GIB67_022279	GIB67_022279	42596	rna-gnl|WGS:JACGCM|KingUnif41889.1	GO:0004553(hydrolase activity, hydrolyzing O-glycosyl compounds);GO:0030247(polysaccharide binding);GO:0046658(anchored component of plasma membrane)	00500(Starch and sucrose metabolism)	K19893	EC:3.2.1.39	major pollen allergen Ole e 10 [Herrania umbratica]	NA	116.468	132.114	114.344	0.853831	2.7718	3.07377	33.8721	36.4322	28.8927	1.05422e-18	6.97926e-16	yes
gene-GIB67_036202	GIB67_036202	39558	rna-gnl|WGS:JACGCM|KingUnif13659.1	GO:0003674(molecular_function);GO:0005575(cellular_component);GO:0008150(biological_process)	03040(Spliceosome);04141(Protein processing in endoplasmic reticulum);04144(Endocytosis)	K03283	NA	hypothetical protein AQUCO_00700973v1 [Aquilegia coerulea]	NA	99.6876	149.902	153.074	0.791354	3.3003	1.86346	8.82252	26.5573	13.7006	1.5458e-18	9.92356e-16	yes
gene-GIB67_040484	GIB67_040484	39356	rna-gnl|WGS:JACGCM|KingUnif14958.1	GO:0005737(cytoplasm);GO:0008757(S-adenosylmethionine-dependent methyltransferase activity);GO:0032259(methylation)	NA	NA	NA	hypothetical protein AQUCO_03400290v1 [Aquilegia coerulea]	NA	175.254	4.32038	60.0717	0.652481	1.84997	2.18928	0	0.072813	0.051201	1.63624e-18	1.01952e-15	yes
gene-GIB67_014634	GIB67_014634	6146	rna-gnl|WGS:JACGCM|KingUnif36457.1	GO:0004834(tryptophan synthase activity);GO:0005737(cytoplasm);GO:0030170(pyridoxal phosphate binding)	00260(Glycine, serine and threonine metabolism);00400(Phenylalanine, tyrosine and tryptophan biosynthesis)	K01696	EC:4.2.1.20	tryptophan synthase beta chain 2 [Camellia sinensis]	NA	6.89488	4.08405	15.3585	0.083087	0.032581	0.09831	0.042817	0.186081	0.097868	2.46727e-18	1.49341e-15	yes
gene-GIB67_010909	GIB67_010909	27337	rna-gnl|WGS:JACGCM|KingUnif03577.1	GO:0003924(GTPase activity);GO:0005200(structural constituent of cytoskeleton);GO:0005525(GTP binding);GO:0005737(cytoplasm);GO:0005874(microtubule);GO:0005886(plasma membrane);GO:0007017(microtubule-based process);GO:0009409(response to cold);GO:0009651(response to salt stress);GO:0015630(microtubule cytoskeleton)	04145(Phagosome)	K07375	NA	Tubulin beta-1 chain [Apostasia shenzhenica]	NA	0.043405	0	0	0.175111	2.27244	5.54322	130.546	18.6098	50.1005	2.59515e-18	1.52717e-15	yes
gene-GIB67_000967	GIB67_000967	23368	rna-gnl|WGS:JACGCM|KingUnif08473.1	GO:0016020(membrane);GO:0016709(oxidoreductase activity, acting on paired donors, with incorporation or reduction of molecular oxygen, NAD(P)H as one donor, and incorporation of one atom of oxygen);GO:0044550(secondary metabolite biosynthetic process)	NA	NA	NA	Cytochrome P450 [Macleaya cordata]	NA	0.589972	0.16083	0.250408	9.45032	15.9874	13.7989	35.4437	28.1198	23.4321	5.49065e-18	3.12325e-15	yes
gene-GIB67_005679	GIB67_005679	10440	rna-gnl|WGS:JACGCM|KingUnif11584.1	GO:0005345(purine nucleobase transmembrane transporter activity);GO:0005515(protein binding);GO:0005887(integral component of plasma membrane);GO:0006863(purine nucleobase transport);GO:0009507(chloroplast);GO:0010184(cytokinin transport);GO:0015211(purine nucleoside transmembrane transporter activity);GO:0016021(integral component of membrane)	00010(Glycolysis / Gluconeogenesis);00030(Pentose phosphate pathway);00051(Fructose and mannose metabolism);00052(Galactose metabolism);03018(RNA degradation)	K00850	EC:2.7.1.11	hypothetical protein AQUCO_01000091v1 [Aquilegia coerulea]	NA	0	0.052453	0	1.09333	1.06105	1.53849	4.72394	39.8787	18.0222	5.60225e-18	3.12325e-15	yes
gene-GIB67_003261	GIB67_003261	29801	rna-gnl|WGS:JACGCM|KingUnif16358.1	GO:0042802(identical protein binding)	NA	NA	NA	PREDICTED: nodulation receptor kinase [Vitis vinifera]	NA	0.217149	0.272974	0.325346	2.66196	9.09701	4.48379	16.6586	31.036	21.0785	7.02888e-18	3.81813e-15	yes
gene-GIB67_028331	GIB67_028331	22696	rna-gnl|WGS:JACGCM|KingUnif13746.1	NA	NA	NA	NA	uncharacterized protein LOC107480422 isoform X2 [Arachis duranensis]	NA	0	0	0	0.085845	0.119549	0	8.7934	9.53197	10.0325	7.82312e-18	4.14332e-15	yes
gene-GIB67_008287	GIB67_008287	14902	rna-gnl|WGS:JACGCM|KingUnif41418.1	GO:0004364(glutathione transferase activity);GO:0005737(cytoplasm);GO:0006749(glutathione metabolic process);GO:0009407(toxin catabolic process)	00480(Glutathione metabolism)	K00799	EC:2.5.1.18	Glutathione S-transferase [Macleaya cordata]	NA	0.058451	0.053257	0.014409	14.8406	35.4342	4.57876	14.8952	121.36	35.9715	9.39444e-18	4.85417e-15	yes
gene-GIB67_010637	GIB67_010637	7773	rna-gnl|WGS:JACGCM|KingUnif01701.1	GO:0005737(cytoplasm);GO:0009055(electron transfer activity);GO:0015035(protein disulfide oxidoreductase activity);GO:0045454(cell redox homeostasis);GO:0046872(metal ion binding);GO:0051537(2 iron, 2 sulfur cluster binding)	NA	NA	NA	Glutaredoxin [Macleaya cordata]	NA	50.4359	136.059	125.699	0.344615	1.41707	0.305885	0.202323	2.66684	0.332381	1.38262e-17	6.97398e-15	yes
gene-GIB67_000399	GIB67_000399	20277	rna-gnl|WGS:JACGCM|KingUnif31366.1	GO:0004497(monooxygenase activity);GO:0007275(multicellular organism development);GO:0010268(brassinosteroid homeostasis);GO:0016125(sterol metabolic process);GO:0016132(brassinosteroid biosynthetic process)	NA	NA	NA	PREDICTED: beta-amyrin 28-oxidase [Theobroma cacao]	NA	0.525412	0.110737	0.163374	16.1723	29.6781	90.7145	159.862	52.3578	74.8625	1.79546e-17	8.84576e-15	yes
gene-GIB67_031293	GIB67_031293	2405	rna-gnl|WGS:JACGCM|KingUnif00453.1	NA	NA	NA	NA		NA	0	0	0	0.657917	0.894323	5.86956	30.863	10.3142	49.4119	2.53258e-17	1.21938e-14	yes
gene-GIB67_000873	GIB67_000873	35694	rna-gnl|WGS:JACGCM|KingUnif18222.1	GO:0005634(nucleus);GO:0005886(plasma membrane);GO:0016757(transferase activity, transferring glycosyl groups);GO:0046524(sucrose-phosphate synthase activity)	00500(Starch and sucrose metabolism)	K00696	EC:2.4.1.14	sucrose-phosphate synthase 1 [Vitis vinifera]	NA	42.6838	249.63	137.18	0.68873	1.35835	1.58348	1.86357	8.64729	2.14078	2.91144e-17	1.37064e-14	yes
gene-GIB67_027804	GIB67_027804	254	rna-gnl|WGS:JACGCM|KingUnif15265.1	GO:0003674(molecular_function);GO:0005739(mitochondrion);GO:0019941(modification-dependent protein catabolic process);GO:0030162(regulation of proteolysis);GO:0031386(protein tag);GO:0070628(proteasome binding)	04141(Protein processing in endoplasmic reticulum)	K09555	NA	Ubiquitin domain [Macleaya cordata]	NA	0	0	0	11.4523	9.85377	25.9224	23.413	14.3894	8.64536	5.36298e-17	2.46989e-14	yes
gene-GIB67_020630	GIB67_020630	25742	rna-gnl|WGS:JACGCM|KingUnif33080.1	GO:0005515(protein binding);GO:0005524(ATP binding);GO:0005739(mitochondrion);GO:0005983(starch catabolic process);GO:0009507(chloroplast);GO:0009570(chloroplast stroma);GO:0009610(response to symbiotic fungus);GO:0009631(cold acclimation);GO:0009941(chloroplast envelope);GO:0016310(phosphorylation);GO:0046872(metal ion binding);GO:0050521(alpha-glucan, water dikinase activity)	NA	NA	NA	putative transcription elongation factor SPT5 homolog 1 isoform X1 [Phalaenopsis equestris]	NA	0	0	0	0.123132	0.10606	1.05486	24.4789	14.2714	7.53726	5.66851e-17	2.55505e-14	yes
gene-GIB67_028769	GIB67_028769	28238	rna-gnl|WGS:JACGCM|KingUnif09439.1	GO:0000139(Golgi membrane);GO:0000271(polysaccharide biosynthetic process);GO:0000977(RNA polymerase II regulatory region sequence-specific DNA binding);GO:0005794(Golgi apparatus);GO:0005886(plasma membrane);GO:0009833(plant-type primary cell wall biogenesis);GO:0016021(integral component of membrane);GO:0016740(transferase activity);GO:0016757(transferase activity, transferring glycosyl groups)…	NA	NA	NA	PREDICTED: cellulose synthase-like protein G1 [Solanum tuberosum]	NA	0.990069	0.413213	0.243244	47.6758	59.5911	185.432	154.032	73.2352	43.7343	6.19659e-17	2.71216e-14	yes
gene-GIB67_004702	GIB67_004702	2686	rna-gnl|WGS:JACGCM|KingUnif18386.1	GO:0000103(sulfate assimilation);GO:0005829(cytosol);GO:0005886(plasma membrane);GO:0006457(protein folding);GO:0015035(protein disulfide oxidoreductase activity);GO:0016671(oxidoreductase activity, acting on a sulfur group of donors, disulfide as acceptor);GO:0034599(cellular response to oxidative stress);GO:0045454(cell redox homeostasis);GO:0055114(oxidation-reduction process)	NA	NA	NA	Thioredoxin [Macleaya cordata]	NA	83.7973	93.319	79.2627	2.19503	1.40426	2.63299	10.3892	15.2964	11.1202	6.2731e-17	2.71216e-14	yes
gene-GIB67_040352	GIB67_040352	37973	rna-gnl|WGS:JACGCM|KingUnif39895.1	GO:0003677(DNA binding);GO:0003700(DNA binding transcription factor activity);GO:0005634(nucleus);GO:0006351(transcription, DNA-templated);GO:0006355(regulation of transcription, DNA-templated);GO:0007275(multicellular organism development);GO:0009873(ethylene-activated signaling pathway);GO:1905392(plant organ morphogenesis)	NA	NA	NA	PREDICTED: AP2-like ethylene-responsive transcription factor AIL1 [Nelumbo nucifera]	NA	0	0	0	26.8394	0.200101	13.7565	0.157249	0.036067	0.064756	8.68863e-17	3.68137e-14	yes
gene-GIB67_042322	GIB67_042322	36380	rna-gnl|WGS:JACGCM|KingUnif23892.1	GO:0016020(membrane);GO:0016709(oxidoreductase activity, acting on paired donors, with incorporation or reduction of molecular oxygen, NAD(P)H as one donor, and incorporation of one atom of oxygen);GO:0044550(secondary metabolite biosynthetic process)	NA	NA	NA	cytochrome P450 82C4 [Populus trichocarpa]	NA	0	0.014498	0	1.60818	5.69462	6.05225	17.8875	6.28082	15.0941	9.98337e-17	4.14701e-14	yes
gene-GIB67_019306	GIB67_019306	40768	rna-gnl|WGS:JACGCM|KingUnif09445.1	GO:0016020(membrane);GO:0016709(oxidoreductase activity, acting on paired donors, with incorporation or reduction of molecular oxygen, NAD(P)H as one donor, and incorporation of one atom of oxygen);GO:0044550(secondary metabolite biosynthetic process)	NA	NA	NA	Cytochrome P450 [Macleaya cordata]	NA	0	0	0	1.67274	0.31296	0.766043	15.228	12.4157	10.4803	1.06238e-16	4.32819e-14	yes
gene-GIB67_006087	GIB67_006087	32519	rna-gnl|WGS:JACGCM|KingUnif08582.1	GO:0016020(membrane);GO:0016709(oxidoreductase activity, acting on paired donors, with incorporation or reduction of molecular oxygen, NAD(P)H as one donor, and incorporation of one atom of oxygen);GO:0044550(secondary metabolite biosynthetic process)	NA	NA	NA	hypothetical protein AQUCO_00201291v1 [Aquilegia coerulea]	NA	1.50829	0.832125	0.915929	5.6704	10.6856	11.5449	49.7871	38.3312	31.4005	1.47323e-16	5.88874e-14	yes
gene-GIB67_006835	GIB67_006835	41207	rna-gnl|WGS:JACGCM|KingUnif35374.1	GO:0005215(transporter activity);GO:0005886(plasma membrane);GO:0006857(oligopeptide transport);GO:0015706(nitrate transport);GO:0016020(membrane);GO:0016021(integral component of membrane);GO:0055085(transmembrane transport);GO:0080054(low-affinity nitrate transmembrane transporter activity)	NA	NA	NA	PTR2 domain-containing protein [Cephalotus follicularis]	NA	3.71233	10.3786	9.08249	3.39837	3.4061	11.1745	0	0	0	1.51931e-16	5.96047e-14	yes
gene-GIB67_034294	GIB67_034294	7285	rna-gnl|WGS:JACGCM|KingUnif11851.1	GO:0007165(signal transduction);GO:0016020(membrane)	NA	NA	NA	hypothetical protein CCACVL1_20718 [Corchorus capsularis]	NA	0	0	0	0.359402	0.325402	0.260244	3.37336	3.79254	1.39836	1.80136e-16	6.93851e-14	yes
gene-GIB67_039596	GIB67_039596	2158	rna-gnl|WGS:JACGCM|KingUnif42982.1	GO:0003713(transcription coactivator activity);GO:0005515(protein binding);GO:0005634(nucleus);GO:0006351(transcription, DNA-templated);GO:0006355(regulation of transcription, DNA-templated);GO:0008283(cell proliferation);GO:0009955(adaxial/abaxial pattern specification);GO:0045944(positive regulation of transcription by RNA polymerase II);GO:0048366(leaf development)	NA	NA	NA	SSXT [Macleaya cordata]	NA	0.304528	0.380723	0.150295	215.056	1.32192	205.252	1.21043	2.25986	1.16491	1.95106e-16	7.25936e-14	yes
gene-GIB67_027890	GIB67_027890	35398	rna-gnl|WGS:JACGCM|KingUnif01321.1	GO:0005737(cytoplasm);GO:0008757(S-adenosylmethionine-dependent methyltransferase activity);GO:0032259(methylation)	00130(Ubiquinone and other terpenoid-quinone biosynthesis)	K05928	EC:2.1.1.95	hypothetical protein DM860_016574 [Cuscuta australis]	NA	0.145471	0.133748	0.69367	7.1008	6.67812	24.1287	45.3849	77.1362	44.1413	1.95319e-16	7.25936e-14	yes
gene-GIB67_033710	GIB67_033710	2961	rna-gnl|WGS:JACGCM|KingUnif28936.1	GO:0003680(AT DNA binding);GO:0003700(DNA binding transcription factor activity);GO:0005634(nucleus);GO:0006351(transcription, DNA-templated);GO:0006355(regulation of transcription, DNA-templated)	NA	NA	NA	PREDICTED: AT-hook motif nuclear-localized protein 25-like [Gossypium arboreum]	NA	0	0	0	2.39365	5.3117	2.83374	13.9204	18.0198	6.05318	1.98908e-16	7.26528e-14	yes
gene-GIB67_001707	GIB67_001707	33272	rna-gnl|WGS:JACGCM|KingUnif20079.1	GO:0005524(ATP binding);GO:0005829(cytosol);GO:0006000(fructose metabolic process);GO:0008865(fructokinase activity);GO:0009507(chloroplast);GO:0016301(kinase activity);GO:0019252(starch biosynthetic process)	00051(Fructose and mannose metabolism);00500(Starch and sucrose metabolism);00520(Amino sugar and nucleotide sugar metabolism)	K00847	EC:2.7.1.4	Carbohydrate kinase PfkB [Macleaya cordata]	NA	0	0	0	1.48328	1.67735	3.96597	12.8438	6.24838	7.66655	2.67441e-16	9.60295e-14	yes
gene-GIB67_042850	GIB67_042850	7136	rna-gnl|WGS:JACGCM|KingUnif09689.1	GO:0005783(endoplasmic reticulum);GO:0005886(plasma membrane);GO:0009926(auxin polar transport);GO:0010252(auxin homeostasis);GO:0010329(auxin efflux transmembrane transporter activity)	NA	NA	NA	PIN-like protein, partial [Euptelea pleiosperma]	NA	21.0998	9.30603	203.397	0.042553	0.241634	0.083326	0.311943	0.397618	0	2.73177e-16	9.64541e-14	yes
gene-GIB67_030541	GIB67_030541	39542	rna-gnl|WGS:JACGCM|KingUnif29223.1	GO:0004601(peroxidase activity);GO:0009505(plant-type cell wall);GO:0009664(plant-type cell wall organization)	00940(Phenylpropanoid biosynthesis)	K00430	EC:1.11.1.7	PREDICTED: peroxidase 5 [Eucalyptus grandis]	NA	1.04022	3.44086	0.772324	318.599	290.506	252.264	693.997	223.602	696.253	3.18812e-16	1.10722e-13	yes
gene-GIB67_025232	GIB67_025232	12602	rna-gnl|WGS:JACGCM|KingUnif36692.1	GO:0005618(cell wall);GO:0009506(plasmodesma);GO:0010497(plasmodesmata-mediated intercellular transport);GO:0033609(oxalate metabolic process);GO:0046564(oxalate decarboxylase activity);GO:2000280(regulation of root development)	NA	NA	NA	Germin [Parasponia andersonii]	NA	0.172834	0.108678	1.07827	3.08099	10.3221	15.94	154.802	145.673	39.6462	4.15361e-16	1.41926e-13	yes
gene-GIB67_009147	GIB67_009147	15863	rna-gnl|WGS:JACGCM|KingUnif09340.1	GO:0004175(endopeptidase activity);GO:0005783(endoplasmic reticulum);GO:0005887(integral component of plasma membrane);GO:0007219(Notch signaling pathway);GO:0016485(protein processing);GO:0043085(positive regulation of catalytic activity);GO:0070765(gamma-secretase complex)	NA	NA	NA	Gamma-secretase subunit Aph-1 [Corchorus olitorius]	NA	22.1865	14.0288	9.89467	16.0556	7.21787	11.4592	0	0.107776	0	5.41646e-16	1.82139e-13	yes
gene-GIB67_007797	GIB67_007797	16207	rna-gnl|WGS:JACGCM|KingUnif32208.1	NA	NA	NA	NA	hypothetical protein AQUCO_00300170v1 [Aquilegia coerulea]	NA	3.60583	2.29858	9.65798	2.54433	1.62085	1.96281	74.9973	155.523	66.3591	5.78537e-16	1.91505e-13	yes
gene-GIB67_027936	GIB67_027936	35448	rna-gnl|WGS:JACGCM|KingUnif09125.1	GO:0033809(anthocyanin 6''-O-malonyltransferase activity)	00942(Anthocyanin biosynthesis)	K21383	EC:2.3.1.215	hypothetical protein AQUCO_00800032v1 [Aquilegia coerulea]	NA	0.032738	0.041014	0	0.242043	1.34377	1.61497	9.87883	44.3037	4.87538	6.28858e-16	2.04959e-13	yes
gene-GIB67_030051	GIB67_030051	17498	rna-gnl|WGS:JACGCM|KingUnif02992.1	GO:0005634(nucleus);GO:0098519(nucleotide phosphatase activity, acting on free nucleotides)	00230(Purine metabolism);00730(Thiamine metabolism)	K06928	EC:3.6.1.15	PH01B031C15.3 [Phyllostachys edulis]	NA	0	0	0	7.39223	5.32909	11.0546	0	0	0	7.49329e-16	2.40523e-13	yes
gene-GIB67_033394	GIB67_033394	31159	rna-gnl|WGS:JACGCM|KingUnif03170.1	GO:0004161(dimethylallyltranstransferase activity);GO:0004311(farnesyltranstransferase activity);GO:0004337(geranyltranstransferase activity);GO:0004659(prenyltransferase activity);GO:0005515(protein binding);GO:0005829(cytosol);GO:0008299(isoprenoid biosynthetic process);GO:0009507(chloroplast);GO:0009513(etioplast);GO:0009536(plastid);GO:0009793(embryo development ending in seed dormancy);GO:00…	00900(Terpenoid backbone biosynthesis)	K13789	EC:2.5.1.1;EC:2.5.1.10	heterodimeric geranylgeranyl pyrophosphate synthase small subunit, chloroplastic-like [Quercus suber]	NA	4.55761	217.49	683.998	6.61249	4.077	11.0161	0.439784	0.523824	0.656075	7.85971e-16	2.48519e-13	yes
gene-GIB67_030486	GIB67_030486	1949	rna-gnl|WGS:JACGCM|KingUnif35034.1	GO:0000287(magnesium ion binding);GO:0004170(dUTP diphosphatase activity);GO:0005737(cytoplasm);GO:0006226(dUMP biosynthetic process);GO:0046081(dUTP catabolic process)	00240(Pyrimidine metabolism)	K01520	EC:3.6.1.23	deoxyuridine 5'-triphosphate nucleotidohydrolase [Chenopodium quinoa]	NA	6.38689	7.74367	5.00856	15.9015	5.34339	10.7163	0	0	0	8.76259e-16	2.72993e-13	yes
gene-GIB67_040034	GIB67_040034	18401	rna-gnl|WGS:JACGCM|KingUnif22920.1	GO:0003674(molecular_function);GO:0005737(cytoplasm);GO:0005783(endoplasmic reticulum);GO:0005789(endoplasmic reticulum membrane);GO:0009658(chloroplast organization);GO:0010274(hydrotropism);GO:0016020(membrane);GO:0032541(cortical endoplasmic reticulum)	NA	NA	NA	PREDICTED: protein MIZU-KUSSEI 1-like [Nelumbo nucifera]	NA	0	0	0	0.702315	1.80868	1.15993	6.44458	10.4456	7.13232	1.1712e-15	3.57736e-13	yes
gene-GIB67_017445	GIB67_017445	27434	rna-gnl|WGS:JACGCM|KingUnif34720.1	GO:0003700(DNA binding transcription factor activity);GO:0005634(nucleus);GO:0006355(regulation of transcription, DNA-templated);GO:0030154(cell differentiation);GO:0043565(sequence-specific DNA binding);GO:0048831(regulation of shoot system development)	04075(Plant hormone signal transduction)	K14494	NA	Transcription factor GRAS [Macleaya cordata]	NA	14.6399	28.506	26.6495	2.18318	2.04154	1.79751	0.74029	1.48548	0.588412	1.18204e-15	3.57736e-13	yes
gene-GIB67_003009	GIB67_003009	29481	rna-gnl|WGS:JACGCM|KingUnif42923.1	GO:0005515(protein binding);GO:0005634(nucleus);GO:0005737(cytoplasm);GO:0030246(carbohydrate binding)	04626(Plant-pathogen interaction)	K13459	NA	hypothetical protein AQUCO_00500064v1 [Aquilegia coerulea]	NA	0.20772	0.727374	0.30673	3.352	6.79942	6.83589	21.4647	21.7131	17.6494	1.321e-15	3.92434e-13	yes
gene-GIB67_007392	GIB67_007392	21399	rna-gnl|WGS:JACGCM|KingUnif10859.1	GO:0004497(monooxygenase activity);GO:0007275(multicellular organism development);GO:0010268(brassinosteroid homeostasis);GO:0016125(sterol metabolic process);GO:0016132(brassinosteroid biosynthetic process)	NA	NA	NA	Cytochrome P450 [Macleaya cordata]	NA	0.218463	0.159445	0.097788	10.352	11.0566	66.258	91.9201	15.836	58.6985	1.33374e-15	3.92434e-13	yes
gene-GIB67_028429	GIB67_028429	24802	rna-gnl|WGS:JACGCM|KingUnif39998.1	NA	NA	NA	NA	hypothetical protein CCACVL1_03954 [Corchorus capsularis]	NA	0.093607	0	0	2.19081	4.54849	3.07215	14.3055	60.4726	19.0725	1.50358e-15	4.3104e-13	yes
gene-GIB67_030543	GIB67_030543	39541	rna-gnl|WGS:JACGCM|KingUnif01991.1	GO:0004601(peroxidase activity);GO:0009505(plant-type cell wall);GO:0009664(plant-type cell wall organization)	00940(Phenylpropanoid biosynthesis)	K00430	EC:1.11.1.7	PREDICTED: peroxidase 5 [Eucalyptus grandis]	NA	0.10744	1.22733	0.759998	57.804	207.099	103.741	248.018	77.173	360.921	1.50564e-15	4.3104e-13	yes
gene-GIB67_033103	GIB67_033103	17336	rna-gnl|WGS:JACGCM|KingUnif29496.1	GO:0051213(dioxygenase activity)	00941(Flavonoid biosynthesis)	K05278	EC:1.14.20.6	hypothetical protein AQUCO_00600285v1 [Aquilegia coerulea]	NA	3.39863	0.894563	0.30693	129.182	36.4635	315.441	7.20955	2.32837	2.85082	1.59476e-15	4.50466e-13	yes
gene-GIB67_006587	GIB67_006587	36147	rna-gnl|WGS:JACGCM|KingUnif24209.1	GO:0005509(calcium ion binding);GO:0005544(calcium-dependent phospholipid binding);GO:0005886(plasma membrane)	00270(Cysteine and methionine metabolism);00450(Selenocompound metabolism)	K00549	EC:2.1.1.14	hypothetical protein AQUCO_03400204v1 [Aquilegia coerulea]	NA	0.021978	0	0	36.5282	0.323919	26.7775	0.151071	0.503544	0.075836	1.92914e-15	5.33832e-13	yes
gene-GIB67_028768	GIB67_028768	28237	rna-gnl|WGS:JACGCM|KingUnif14038.1	GO:0000139(Golgi membrane);GO:0000271(polysaccharide biosynthetic process);GO:0000977(RNA polymerase II regulatory region sequence-specific DNA binding);GO:0005794(Golgi apparatus);GO:0005886(plasma membrane);GO:0009833(plant-type primary cell wall biogenesis);GO:0016021(integral component of membrane);GO:0016740(transferase activity);GO:0016757(transferase activity, transferring glycosyl groups)…	NA	NA	NA	Cellulose synthase (UDP-forming) [Handroanthus impetiginosus]	NA	0.403931	0.145749	0.349925	14.6548	26.095	71.1375	32.7498	11.3694	16.8187	1.94029e-15	5.33832e-13	yes
gene-GIB67_019528	GIB67_019528	16535	rna-gnl|WGS:JACGCM|KingUnif42335.1	GO:0005576(extracellular region);GO:0016042(lipid catabolic process);GO:0016788(hydrolase activity, acting on ester bonds);GO:0052689(carboxylic ester hydrolase activity)	00561(Glycerolipid metabolism)	K00679	EC:2.3.1.158	Lipase [Macleaya cordata]	NA	0	0	0	0.189367	0.918781	0.396679	5.5162	4.9186	9.2395	2.23784e-15	6.01785e-13	yes
gene-GIB67_042317	GIB67_042317	36371	rna-gnl|WGS:JACGCM|KingUnif40559.1	NA	NA	NA	NA		NA	634.982	1513.55	903.943	10.0226	24.1018	26.8611	50.7485	78.2875	21.8282	2.24409e-15	6.01785e-13	yes
gene-GIB67_014412	GIB67_014412	29291	rna-gnl|WGS:JACGCM|KingUnif40456.1	GO:0005345(purine nucleobase transmembrane transporter activity);GO:0005515(protein binding);GO:0005887(integral component of plasma membrane);GO:0006863(purine nucleobase transport);GO:0009507(chloroplast);GO:0010184(cytokinin transport);GO:0015211(purine nucleoside transmembrane transporter activity);GO:0016021(integral component of membrane)	00010(Glycolysis / Gluconeogenesis);00030(Pentose phosphate pathway);00051(Fructose and mannose metabolism);00052(Galactose metabolism);03018(RNA degradation)	K00850	EC:2.7.1.11	purine permease 3 [Ricinus communis]	NA	0.078127	0	0	2.55852	17.5103	16.4446	29.6824	31.7809	10.2834	2.77384e-15	7.34549e-13	yes
gene-GIB67_016085	GIB67_016085	40598	rna-gnl|WGS:JACGCM|KingUnif01771.1	GO:0003677(DNA binding);GO:0003700(DNA binding transcription factor activity);GO:0005515(protein binding);GO:0005634(nucleus);GO:0005739(mitochondrion);GO:0006351(transcription, DNA-templated);GO:0006355(regulation of transcription, DNA-templated);GO:0009908(flower development);GO:0010088(phloem development);GO:0010089(xylem development);GO:0045893(positive regulation of transcription, DNA-templa…	04933(AGE-RAGE signaling pathway in diabetic complications)	K06236	NA	PREDICTED: myb family transcription factor APL isoform X4 [Elaeis guineensis]	NA	38.2206	61.7503	58.5858	1.66482	1.44379	2.49439	3.70506	9.277	2.25568	3.204e-15	8.37984e-13	yes
gene-GIB67_034877	GIB67_034877	42700	rna-gnl|WGS:JACGCM|KingUnif31935.1	GO:0005887(integral component of plasma membrane)	NA	NA	NA	General substrate transporter [Macleaya cordata]	NA	0	0.037647	0.101125	0.066073	0.03821	0.066422	1.10785	48.6725	3.87011	3.92837e-15	1.01491e-12	yes
gene-GIB67_037466	GIB67_037466	12233	rna-gnl|WGS:JACGCM|KingUnif35101.1	GO:0000139(Golgi membrane);GO:0003824(catalytic activity);GO:0005794(Golgi apparatus);GO:0006486(protein glycosylation);GO:0016020(membrane);GO:0016021(integral component of membrane);GO:0016757(transferase activity, transferring glycosyl groups);GO:0071555(cell wall organization)	NA	NA	NA	unnamed protein product, partial [Vitis vinifera]	NA	1.66142	2.3186	8.83492	0.022376	0.012701	0.054173	0.097919	0.089564	0.07919	3.97716e-15	1.01513e-12	yes
gene-GIB67_036436	GIB67_036436	39932	rna-gnl|WGS:JACGCM|KingUnif14099.1	GO:0004497(monooxygenase activity)	NA	NA	NA	Cytochrome P450, putative [Theobroma cacao]	NA	1.59091	0.488743	0.239033	28.0726	34.6213	108.62	203.24	127.856	101.049	4.15971e-15	1.04909e-12	yes
gene-GIB67_000949	GIB67_000949	23359	rna-gnl|WGS:JACGCM|KingUnif41381.1	GO:0000038(very long-chain fatty acid metabolic process);GO:0005783(endoplasmic reticulum);GO:0005789(endoplasmic reticulum membrane);GO:0006633(fatty acid biosynthetic process);GO:0009409(response to cold);GO:0009416(response to light stimulus);GO:0009922(fatty acid elongase activity);GO:0010025(wax biosynthetic process);GO:0016020(membrane);GO:0016021(integral component of membrane);GO:0016746(…	00062(Fatty acid elongation)	K15397	EC:2.3.1.199	FAE1/Type III polyketide synthase-like protein [Macleaya cordata]	NA	0.039473	0	0	30.831	1.01776	30.3312	0.043231	0.560038	0.194646	4.75311e-15	1.16032e-12	yes
gene-GIB67_019307	GIB67_019307	40767	rna-gnl|WGS:JACGCM|KingUnif30760.1	GO:0016020(membrane);GO:0016709(oxidoreductase activity, acting on paired donors, with incorporation or reduction of molecular oxygen, NAD(P)H as one donor, and incorporation of one atom of oxygen);GO:0044550(secondary metabolite biosynthetic process)	NA	NA	NA	cytochrome P450 82C4 [Populus trichocarpa]	NA	0	0	0	1.00994	0.349757	1.43307	11.071	5.03232	6.92492	4.7589e-15	1.16032e-12	yes
gene-GIB67_021944	GIB67_021944	17123	rna-gnl|WGS:JACGCM|KingUnif15457.1	GO:0010334(sesquiterpene synthase activity);GO:0033383(geranyl diphosphate metabolic process)	00909(Sesquiterpenoid and triterpenoid biosynthesis)	K15803	EC:4.2.3.75	hypothetical protein VITISV_030783 [Vitis vinifera]	NA	0.013585	0.136264	0.049857	0.228264	0.201515	1.51106	8.57982	101.865	5.85696	4.76507e-15	1.16032e-12	yes
gene-GIB67_013106	GIB67_013106	8434	rna-gnl|WGS:JACGCM|KingUnif37866.1	GO:0004497(monooxygenase activity);GO:0007275(multicellular organism development);GO:0010268(brassinosteroid homeostasis);GO:0016125(sterol metabolic process);GO:0016132(brassinosteroid biosynthetic process)	NA	NA	NA	hypothetical protein AQUCO_04500214v1 [Aquilegia coerulea]	NA	0.711229	0.106417	0.303151	4.05911	9.6847	13.6684	36.4474	35.7005	28.0018	5.14549e-15	1.23872e-12	yes
gene-GIB67_032568	GIB67_032568	31731	rna-gnl|WGS:JACGCM|KingUnif01375.1	GO:0005576(extracellular region);GO:0005634(nucleus)	00230(Purine metabolism);00240(Pyrimidine metabolism);03020(RNA polymerase)	K03006	EC:2.7.7.6	PREDICTED: protodermal factor 1-like [Raphanus sativus]	NA	0.535488	0.101165	0.133571	61.0166	0.618713	166.186	0.207105	0.338229	0.418454	6.38025e-15	1.51871e-12	yes
gene-GIB67_011963	GIB67_011963	28958	rna-gnl|WGS:JACGCM|KingUnif05689.1	GO:0005829(cytosol);GO:0008171(O-methyltransferase activity);GO:0008757(S-adenosylmethionine-dependent methyltransferase activity);GO:0019438(aromatic compound biosynthetic process)	00940(Phenylpropanoid biosynthesis)	K13066	EC:2.1.1.68	Caffeic Acid5-Hydroxyferulic Acid 35-O-Methyltransferase [Populus tomentosa]	NA	0	0.043314	0.182725	0.948477	5.99236	10.1666	32.5398	45.6979	26.4554	7.55218e-15	1.7777e-12	yes
gene-GIB67_036036	GIB67_036036	16462	rna-gnl|WGS:JACGCM|KingUnif39109.1	GO:0004497(monooxygenase activity);GO:0005506(iron ion binding);GO:0005783(endoplasmic reticulum);GO:0005789(endoplasmic reticulum membrane);GO:0009507(chloroplast);GO:0010345(suberin biosynthetic process);GO:0016021(integral component of membrane);GO:0016705(oxidoreductase activity, acting on paired donors, with incorporation or reduction of molecular oxygen);GO:0019825(oxygen binding);GO:002003…	00073(Cutin, suberine and wax biosynthesis)	K15402	EC:1.14.-.-	Cytochrome P450 [Macleaya cordata]	NA	0	0	0	0.160285	0.260804	0.055212	2.43895	3.93665	3.9451	8.79779e-15	2.04814e-12	yes
gene-GIB67_025445	GIB67_025445	16278	rna-gnl|WGS:JACGCM|KingUnif09396.1	GO:0006855(drug transmembrane transport)	NA	NA	NA	Multi antimicrobial extrusion protein [Macleaya cordata]	NA	0.932956	0.495774	0.115361	5.88949	12.4871	13.3042	34.9295	33.0598	41.4192	1.13128e-14	2.60501e-12	yes
gene-GIB67_039401	GIB67_039401	24970	rna-gnl|WGS:JACGCM|KingUnif39121.1	NA	NA	NA	NA	hypothetical protein CCACVL1_03954 [Corchorus capsularis]	NA	0.081175	0	0.305971	3.00632	8.44501	4.5524	21.9594	83.5219	31.7279	1.1891e-14	2.70872e-12	yes
gene-GIB67_017487	GIB67_017487	27478	rna-gnl|WGS:JACGCM|KingUnif36077.1	GO:0005351(carbohydrate:proton symporter activity);GO:0005355(glucose transmembrane transporter activity);GO:0005887(integral component of plasma membrane);GO:0046323(glucose import)	NA	NA	NA	probable polyol transporter 6 [Quercus suber]	NA	0	0.156895	0.032337	30.6772	17.6983	9.16341	4.70191	5.32564	1.91428	1.2433e-14	2.79295e-12	yes
gene-GIB67_032121	GIB67_032121	17738	rna-gnl|WGS:JACGCM|KingUnif05911.1	NA	NA	NA	NA		NA	0	0	0	0	0	0	1.4286	2.34508	1.45812	1.25244e-14	2.79295e-12	yes
gene-GIB67_010024	GIB67_010024	42929	rna-gnl|WGS:JACGCM|KingUnif20129.1	GO:0005509(calcium ion binding);GO:0005544(calcium-dependent phospholipid binding);GO:0005886(plasma membrane)	00270(Cysteine and methionine metabolism);00450(Selenocompound metabolism)	K00549	EC:2.1.1.14	hypothetical protein AQUCO_00900541v1 [Aquilegia coerulea]	NA	0.022902	0.009779	0.021535	9.62211	0.442583	7.13256	0.190019	0.237467	0.059264	1.29186e-14	2.85083e-12	yes
gene-GIB67_041920	GIB67_041920	16304	rna-gnl|WGS:JACGCM|KingUnif29746.1	NA	NA	NA	NA		NA	672.177	850.379	492.634	20.8927	39.323	28.6227	62.5379	79.3905	43.1243	1.37795e-14	3.00947e-12	yes
gene-GIB67_022182	GIB67_022182	18161	rna-gnl|WGS:JACGCM|KingUnif04161.1	GO:0019915(lipid storage)	NA	NA	NA	Oleosin [Macleaya cordata]	NA	0.960733	0.518808	1.43149	289.549	0.973868	98.891	0.341849	0.460519	0.594336	1.44675e-14	3.12749e-12	yes
gene-GIB67_035636	GIB67_035636	23091	rna-gnl|WGS:JACGCM|KingUnif14865.1	GO:0004497(monooxygenase activity)	NA	NA	NA	Cytochrome P450 [Macleaya cordata]	NA	1.19691	0.279067	0.292663	40.6356	71.1438	284.372	665.777	197.21	309.863	1.81082e-14	3.87497e-12	yes
gene-GIB67_033982	GIB67_033982	26785	rna-gnl|WGS:JACGCM|KingUnif06242.1	GO:0005509(calcium ion binding);GO:0006066(alcohol metabolic process);GO:0016614(oxidoreductase activity, acting on CH-OH group of donors);GO:0030288(outer membrane-bounded periplasmic space);GO:0048038(quinone binding)	NA	NA	NA	PREDICTED: uncharacterized protein LOC104586761 [Nelumbo nucifera]	NA	0.247342	0.167883	0.434497	4.28288	28.381	12.5027	56.5664	13.0788	48.1344	1.89688e-14	4.01854e-12	yes
gene-GIB67_039179	GIB67_039179	21247	rna-gnl|WGS:JACGCM|KingUnif43160.1	GO:0016021(integral component of membrane)	NA	NA	NA	General substrate transporter [Macleaya cordata]	NA	0	0	0	0.023082	0	0	3.79119	5.16922	2.06511	2.2653e-14	4.75153e-12	yes
gene-GIB67_026291	GIB67_026291	37817	rna-gnl|WGS:JACGCM|KingUnif10109.1	GO:0007165(signal transduction);GO:0016020(membrane)	NA	NA	NA	PREDICTED: protein ACCELERATED CELL DEATH 6-like [Ipomoea nil]	NA	0	0	0	0.371106	0.556362	0.776177	1.85281	5.19814	2.32254	2.47947e-14	5.14975e-12	yes
gene-GIB67_037823	GIB67_037823	13124	rna-gnl|WGS:JACGCM|KingUnif06983.1	GO:0000139(Golgi membrane);GO:0003824(catalytic activity);GO:0005794(Golgi apparatus);GO:0006486(protein glycosylation);GO:0016020(membrane);GO:0016021(integral component of membrane);GO:0016757(transferase activity, transferring glycosyl groups);GO:0071555(cell wall organization)	NA	NA	NA	unnamed protein product, partial [Vitis vinifera]	NA	1.23033	1.68029	8.34841	0.022366	0.012696	0.036736	0.078776	0.029286	0.061902	4.16824e-14	8.57322e-12	yes
gene-GIB67_027395	GIB67_027395	23593	rna-gnl|WGS:JACGCM|KingUnif40053.1	GO:0003677(DNA binding);GO:0005506(iron ion binding);GO:0005773(vacuole);GO:0006631(fatty acid metabolic process);GO:0010345(suberin biosynthetic process);GO:0016021(integral component of membrane);GO:0018685(alkane 1-monooxygenase activity);GO:0019825(oxygen binding);GO:0020037(heme binding);GO:0055114(oxidation-reduction process)	00071(Fatty acid degradation);00073(Cutin, suberine and wax biosynthesis)	K15401	EC:1.14.14.80	Cytochrome P450 [Macleaya cordata]	NA	0.166988	0.493637	0.192142	1.99654	9.94177	6.88676	18.5902	16.5318	38.694	4.42707e-14	9.01802e-12	yes
gene-GIB67_004472	GIB67_004472	19861	rna-gnl|WGS:JACGCM|KingUnif05442.1	GO:0003723(RNA binding);GO:0005737(cytoplasm)	NA	NA	NA	RNA recognition motif domain [Macleaya cordata]	NA	0	0.027939	0	15.2425	0.403514	8.76557	0.078886	0.172603	0.070568	4.59002e-14	9.26091e-12	yes
gene-GIB67_009093	GIB67_009093	37221	rna-gnl|WGS:JACGCM|KingUnif22198.1	GO:0010334(sesquiterpene synthase activity);GO:0033383(geranyl diphosphate metabolic process)	00909(Sesquiterpenoid and triterpenoid biosynthesis)	K15803	EC:4.2.3.75	hypothetical protein VITISV_030783 [Vitis vinifera]	NA	0.049771	0.054738	0.008748	0.101646	0.430381	0.106732	1.27948	8.15974	12.5054	5.44403e-14	1.08803e-11	yes
gene-GIB67_019064	GIB67_019064	16724	rna-gnl|WGS:JACGCM|KingUnif15550.1	GO:0009507(chloroplast);GO:0009570(chloroplast stroma);GO:0016787(hydrolase activity);GO:0019144(ADP-sugar diphosphatase activity);GO:0046872(metal ion binding);GO:0080041(ADP-ribose pyrophosphohydrolase activity);GO:0080042(ADP-glucose pyrophosphohydrolase activity)	00051(Fructose and mannose metabolism);00500(Starch and sucrose metabolism);00230(Purine metabolism)	K18447	EC:3.6.1.21	hypothetical protein AQUCO_01300509v1 [Aquilegia coerulea]	NA	0	0	0	0.046437	0	0	4.78793	2.66633	4.239	5.62574e-14	1.11384e-11	yes
gene-GIB67_010182	GIB67_010182	12942	rna-gnl|WGS:JACGCM|KingUnif08837.1	GO:0043161(proteasome-mediated ubiquitin-dependent protein catabolic process);GO:0061630(ubiquitin protein ligase activity)	NA	NA	NA	hypothetical protein AQUCO_02000343v1 [Aquilegia coerulea]	NA	0	0.066864	0	0.784657	1.08502	0.455629	4.05056	14.0449	9.59185	5.8039e-14	1.13848e-11	yes
gene-GIB67_000196	GIB67_000196	1114	rna-gnl|WGS:JACGCM|KingUnif28084.1	NA	NA	NA	NA		NA	0.12627	0.091339	0.122136	0.56169	0.921198	0.904294	9.8319	4.50182	17.6166	6.05163e-14	1.17618e-11	yes
gene-GIB67_030433	GIB67_030433	11958	rna-gnl|WGS:JACGCM|KingUnif30151.1	GO:0003674(molecular_function);GO:0009507(chloroplast);GO:0016021(integral component of membrane);GO:1990641(response to iron ion starvation)	NA	NA	NA	hypothetical protein AQUCO_04200106v1 [Aquilegia coerulea]	NA	16.6135	0.894252	52.1561	0.212242	0.250884	0.192495	0.105564	0.465522	0.180935	9.05668e-14	1.74423e-11	yes
gene-GIB67_006408	GIB67_006408	4213	rna-gnl|WGS:JACGCM|KingUnif40792.1	NA	NA	NA	NA	hypothetical protein TorRG33x02_260620 [Trema orientale]	NA	3.08343	1.20416	0.218905	337.621	501.837	54.6498	18.9565	48.3469	11.2778	9.65918e-14	1.84351e-11	yes
gene-GIB67_027247	GIB67_027247	41786	rna-gnl|WGS:JACGCM|KingUnif22292.1	GO:0004601(peroxidase activity);GO:0005576(extracellular region);GO:0006979(response to oxidative stress);GO:0020037(heme binding);GO:0042744(hydrogen peroxide catabolic process);GO:0046872(metal ion binding);GO:0055114(oxidation-reduction process)	00940(Phenylpropanoid biosynthesis)	K00430	EC:1.11.1.7	Plant peroxidase [Macleaya cordata]	NA	0	0	0	0.239274	0.203221	0.436069	4.49022	2.32554	7.45956	1.09539e-13	2.07195e-11	yes
gene-GIB67_022421	GIB67_022421	18835	rna-gnl|WGS:JACGCM|KingUnif38728.1	GO:0004601(peroxidase activity);GO:0009505(plant-type cell wall);GO:0009664(plant-type cell wall organization)	00940(Phenylpropanoid biosynthesis)	K00430	EC:1.11.1.7	Plant peroxidase [Macleaya cordata]	NA	1.04223	1.99686	0.728103	3.18872	11.5621	15.918	50.0271	54.6264	54.2191	1.11826e-13	2.09648e-11	yes
gene-GIB67_013429	GIB67_013429	32182	rna-gnl|WGS:JACGCM|KingUnif06718.1	GO:0003700(DNA binding transcription factor activity);GO:0005515(protein binding);GO:0005634(nucleus);GO:0006351(transcription, DNA-templated);GO:0006355(regulation of transcription, DNA-templated);GO:0009738(abscisic acid-activated signaling pathway);GO:0033613(activating transcription factor binding);GO:0043565(sequence-specific DNA binding);GO:0045893(positive regulation of transcription, DNA-…	NA	NA	NA	PREDICTED: nuclear transcription factor Y subunit B-1-like [Nelumbo nucifera]	NA	0.158661	0.076442	0.097511	0.231056	0.183872	1.23327	20.178	6.44809	21.7828	1.13112e-13	2.102e-11	yes
gene-GIB67_040546	GIB67_040546	39431	rna-gnl|WGS:JACGCM|KingUnif06520.1	GO:0006069(ethanol oxidation);GO:0016614(oxidoreductase activity, acting on CH-OH group of donors)	NA	NA	NA	hypothetical protein AQUCO_00200530v1 [Aquilegia coerulea]	NA	0.743599	0.987765	2.7183	6.3058	29.6073	32.0969	152.567	47.7143	123.541	1.30932e-13	2.41199e-11	yes
gene-GIB67_002280	GIB67_002280	42493	rna-gnl|WGS:JACGCM|KingUnif27352.1	GO:0005739(mitochondrion);GO:0005886(plasma membrane);GO:0006508(proteolysis);GO:0008233(peptidase activity);GO:0031225(anchored component of membrane)	NA	NA	NA	hypothetical protein CICLE_v10024613mg [Citrus clementina]	NA	0	0.185941	0	0.480996	1.32783	3.91878	26.9973	15.3453	59.2063	1.42885e-13	2.60949e-11	yes
gene-GIB67_001097	GIB67_001097	23499	rna-gnl|WGS:JACGCM|KingUnif11800.1	GO:0005737(cytoplasm);GO:0016740(transferase activity);GO:0016747(transferase activity, transferring acyl groups other than amino-acyl groups)	00942(Anthocyanin biosynthesis)	K21383	EC:2.3.1.215	hypothetical protein AQUCO_00800031v1 [Aquilegia coerulea]	NA	0.024392	0	0	2.23242	13.8942	22.9786	26.1195	2.22359	8.671	1.4564e-13	2.63707e-11	yes
gene-GIB67_029054	GIB67_029054	14392	rna-gnl|WGS:JACGCM|KingUnif11524.1	GO:0016165(linoleate 13S-lipoxygenase activity)	00591(Linoleic acid metabolism)	K15718	EC:1.13.11.58	PREDICTED: probable linoleate 9S-lipoxygenase 5 [Nelumbo nucifera]	NA	11.9109	150.799	52.1727	1.83382	1.25746	2.86381	3.57604	6.15003	3.47924	1.52058e-13	2.72996e-11	yes
gene-GIB67_042717	GIB67_042717	11897	rna-gnl|WGS:JACGCM|KingUnif29753.1	NA	NA	NA	NA	uncharacterized protein LOC18782557 isoform X1 [Prunus persica]	NA	12.558	10.5554	11.6233	12.6929	9.17528	13.276	0.172267	0.280566	0.127293	1.59172e-13	2.83366e-11	yes
gene-GIB67_028878	GIB67_028878	31345	rna-gnl|WGS:JACGCM|KingUnif35164.1	GO:0003677(DNA binding);GO:0003700(DNA binding transcription factor activity);GO:0005515(protein binding);GO:0005634(nucleus);GO:0006351(transcription, DNA-templated);GO:0006355(regulation of transcription, DNA-templated);GO:0016602(CCAAT-binding factor complex);GO:0045893(positive regulation of transcription, DNA-templated);GO:0046982(protein heterodimerization activity);GO:2000306(positive regu…	NA	NA	NA	nuclear transcription factor Y subunit C-1-like [Papaver somniferum]	NA	0.060841	0.483766	0.516719	2.95613	8.81148	9.26243	38.2007	41.1795	17.0436	1.70569e-13	3.01125e-11	yes
gene-GIB67_019632	GIB67_019632	16642	rna-gnl|WGS:JACGCM|KingUnif17395.1	GO:0016020(membrane);GO:0016709(oxidoreductase activity, acting on paired donors, with incorporation or reduction of molecular oxygen, NAD(P)H as one donor, and incorporation of one atom of oxygen);GO:0044550(secondary metabolite biosynthetic process)	NA	NA	NA	cytochrome P450 82C4 [Cinnamomum micranthum f. kanehirae]	NA	0	0.023618	0	0.24646	0.722956	0.285567	0.251546	298.217	4.14014	2.03265e-13	3.55882e-11	yes
gene-GIB67_027878	GIB67_027878	35388	rna-gnl|WGS:JACGCM|KingUnif11910.1	GO:0005737(cytoplasm);GO:0008757(S-adenosylmethionine-dependent methyltransferase activity);GO:0032259(methylation)	00130(Ubiquinone and other terpenoid-quinone biosynthesis)	K05928	EC:2.1.1.95	probable tocopherol O-methyltransferase, chloroplastic [Papaver somniferum]	NA	0.264545	0.319927	1.57303	10.5746	11.3233	40.7758	72.1739	103.906	45.0359	2.11252e-13	3.66834e-11	yes
gene-GIB67_025723	GIB67_025723	42587	rna-gnl|WGS:JACGCM|KingUnif03572.1	GO:0005737(cytoplasm);GO:0016740(transferase activity);GO:0016747(transferase activity, transferring acyl groups other than amino-acyl groups)	00944(Flavone and flavonol biosynthesis);00943(Isoflavonoid biosynthesis)	K13264	EC:2.3.1.115	hypothetical protein AQUCO_00800031v1 [Aquilegia coerulea]	NA	0.043708	0	0.086507	1.51179	3.58405	29.0716	102.515	54.7381	15.6658	2.16018e-13	3.7206e-11	yes
gene-GIB67_009410	GIB67_009410	15735	rna-gnl|WGS:JACGCM|KingUnif27127.1	GO:0008202(steroid metabolic process);GO:0009507(chloroplast);GO:0009737(response to abscisic acid);GO:0009741(response to brassinosteroid);GO:0016491(oxidoreductase activity);GO:0070524(11-beta-hydroxysteroid dehydrogenase (NADP+) activity);GO:0072555(17-beta-ketosteroid reductase activity);GO:0072582(17-beta-hydroxysteroid dehydrogenase (NADP+) activity)	NA	NA	NA	Short-chain dehydrogenase/reductase SDR [Macleaya cordata]	NA	5.82297	4.64549	6.38876	58.2097	124.589	125.266	353.67	197.829	327.397	2.20844e-13	3.77305e-11	yes
gene-GIB67_040228	GIB67_040228	18596	rna-gnl|WGS:JACGCM|KingUnif06080.1	GO:0005618(cell wall);GO:0009506(plasmodesma);GO:0010497(plasmodesmata-mediated intercellular transport);GO:0033609(oxalate metabolic process);GO:0046564(oxalate decarboxylase activity);GO:2000280(regulation of root development)	00450(Selenocompound metabolism)	K00384	EC:1.8.1.9	germin-like protein 2 precursor [Cinnamomum micranthum f. kanehirae]	NA	0	0	0	0.667143	0.74461	0.238626	10.7815	7.93386	5.27111	2.9836e-13	5.05661e-11	yes
gene-GIB67_007138	GIB67_007138	21488	rna-gnl|WGS:JACGCM|KingUnif32488.1	GO:0000977(RNA polymerase II regulatory region sequence-specific DNA binding);GO:0005515(protein binding);GO:0005794(Golgi apparatus);GO:0005886(plasma membrane);GO:0005887(integral component of plasma membrane);GO:0009825(multidimensional cell growth);GO:0009832(plant-type cell wall biogenesis);GO:0009833(plant-type primary cell wall biogenesis);GO:0010330(cellulose synthase complex);GO:0016020(…	NA	NA	NA	Cellulose synthase [Macleaya cordata]	NA	0	0.025176	0	0	0	0.09332	6.4508	9.93972	1.98337	3.02614e-13	5.08799e-11	yes
gene-GIB67_018741	GIB67_018741	31546	rna-gnl|WGS:JACGCM|KingUnif07802.1	GO:0005576(extracellular region);GO:0005618(cell wall);GO:0005794(Golgi apparatus);GO:0005829(cytosol);GO:0006952(defense response);GO:0007165(signal transduction);GO:0009505(plant-type cell wall);GO:0009506(plasmodesma);GO:0016020(membrane);GO:0090353(polygalacturonase inhibitor activity)	NA	NA	NA	hypothetical protein AQUCO_03300085v1 [Aquilegia coerulea]	NA	0.119034	0.132025	0.058619	25.3496	35.6922	15.0919	0.676885	2.73385	11.1329	3.34196e-13	5.57476e-11	yes
gene-GIB67_041908	GIB67_041908	25781	rna-gnl|WGS:JACGCM|KingUnif08831.1	GO:0005737(cytoplasm);GO:0016020(membrane)	00040(Pentose and glucuronate interconversions);00051(Fructose and mannose metabolism)	K01805	EC:5.3.1.5	Xylose isomerase [Macleaya cordata]	NA	2.84004	116.689	160.749	0.437886	1.46215	1.59527	1.85623	3.19787	2.70663	3.40738e-13	5.63949e-11	yes
gene-GIB67_016429	GIB67_016429	23035	rna-gnl|WGS:JACGCM|KingUnif17273.1	NA	NA	NA	NA		NA	0	0	0.049921	0	0	0	3.08938	2.60416	4.06897	3.61274e-13	5.93302e-11	yes
gene-GIB67_006429	GIB67_006429	4227	rna-gnl|WGS:JACGCM|KingUnif05986.1	GO:0004144(diacylglycerol O-acyltransferase activity);GO:0005886(plasma membrane);GO:0019432(triglyceride biosynthetic process);GO:0047196(long-chain-alcohol O-fatty-acyltransferase activity)	00073(Cutin, suberine and wax biosynthesis)	K15406	EC:2.3.1.75;EC:2.3.1.20	O-acyltransferase [Macleaya cordata]	NA	0	0	0	0.172343	0.695317	0.897229	2.36827	10.3401	1.93236	4.12415e-13	6.72078e-11	yes
gene-GIB67_032754	GIB67_032754	18083	rna-gnl|WGS:JACGCM|KingUnif34613.1	GO:0004553(hydrolase activity, hydrolyzing O-glycosyl compounds);GO:0030247(polysaccharide binding);GO:0046658(anchored component of plasma membrane)	00500(Starch and sucrose metabolism)	K19891	EC:3.2.1.39	hypothetical protein AQUCO_03200084v1 [Aquilegia coerulea]	NA	0.602775	3.28389	0.820086	152.223	6.3933	106.012	2.30561	1.88553	3.79053	4.44964e-13	7.19585e-11	yes
gene-GIB67_042884	GIB67_042884	22926	rna-gnl|WGS:JACGCM|KingUnif34117.1	NA	NA	NA	NA	water deficit inducible LP3-like protein, partial [Pseudotsuga menziesii var. menziesii]	NA	589.346	8.06355	4.34854	1.43231	0.199486	0.645502	0.636843	0.700054	0.427871	4.91747e-13	7.89216e-11	yes
gene-GIB67_039157	GIB67_039157	21234	rna-gnl|WGS:JACGCM|KingUnif19736.1	GO:0003954(NADH dehydrogenase activity);GO:0005886(plasma membrane);GO:0016021(integral component of membrane);GO:0051536(iron-sulfur cluster binding)	NA	NA	NA	CASP-like protein POPTRDRAFT_758901 [Theobroma cacao]	NA	0.253551	0.080136	0	0.786608	1.72078	3.24043	21.9805	11.3405	46.1702	6.60199e-13	1.05017e-10	yes
gene-GIB67_003471	GIB67_003471	23735	rna-gnl|WGS:JACGCM|KingUnif37640.1	GO:0006457(protein folding);GO:0009507(chloroplast)	NA	NA	NA	DnaJ domain [Macleaya cordata]	NA	6.23154	2.8285	170.48	0.207273	0.226221	0.698445	0.640747	0.72009	0.23615	6.64256e-13	1.05017e-10	yes
gene-GIB67_009040	GIB67_009040	14766	rna-gnl|WGS:JACGCM|KingUnif31397.1	NA	NA	NA	NA	hypothetical protein CCACVL1_03954 [Corchorus capsularis]	NA	0.129682	0.038532	0.096997	1.9337	2.59361	2.32785	4.49772	28.9968	15.8092	6.85862e-13	1.07629e-10	yes
gene-GIB67_010270	GIB67_010270	13029	rna-gnl|WGS:JACGCM|KingUnif16600.1	GO:0005576(extracellular region);GO:0030246(carbohydrate binding)	NA	NA	NA	hypothetical protein AQUCO_02000358v1 [Aquilegia coerulea]	NA	106.596	91.8115	159.719	3.90985	7.2161	5.27224	8.81958	32.0277	8.56711	7.59411e-13	1.18295e-10	yes
gene-GIB67_040533	GIB67_040533	39413	rna-gnl|WGS:JACGCM|KingUnif27725.1	GO:0005507(copper ion binding);GO:0009809(lignin biosynthetic process);GO:0016722(oxidoreductase activity, oxidizing metal ions)	NA	NA	NA	Multicopper oxidase, type 1 [Corchorus olitorius]	NA	0	0	0	0.11377	0.226466	0.111297	2.0305	2.95064	1.94536	7.69097e-13	1.18929e-10	yes
gene-GIB67_035213	GIB67_035213	41933	rna-gnl|WGS:JACGCM|KingUnif13744.1	GO:0005634(nucleus);GO:0016787(hydrolase activity)	00760(Nicotinate and nicotinamide metabolism)	K18551	EC:3.1.3.-	HAD-superfamily hydrolase, subfamily IA, variant 3 [Corchorus capsularis]	NA	37.9336	193.704	175.572	14.7866	17.5244	21.9633	1.13198	6.10545	2.72246	7.87127e-13	1.20835e-10	yes
gene-GIB67_002770	GIB67_002770	31505	rna-gnl|WGS:JACGCM|KingUnif28460.1	GO:0005524(ATP binding);GO:0005739(mitochondrion);GO:0006952(defense response);GO:0043531(ADP binding)	04626(Plant-pathogen interaction)	K13459	NA	hypothetical protein AQUCO_08600047v1, partial [Aquilegia coerulea]	NA	0	0.026141	0	0.198876	0.110677	0.058422	2.26077	2.91896	2.40884	9.35206e-13	1.42535e-10	yes
gene-GIB67_034596	GIB67_034596	17564	rna-gnl|WGS:JACGCM|KingUnif25335.1	GO:0006952(defense response);GO:0009506(plasmodesma);GO:0046658(anchored component of plasma membrane)	NA	NA	NA	PREDICTED: NDR1/HIN1-like protein 12 [Nelumbo nucifera]	NA	371.942	300.633	241.125	15.0034	19.5877	23.9046	72.5842	82.2681	64.3714	1.09644e-12	1.65915e-10	yes
gene-GIB67_030483	GIB67_030483	1950	rna-gnl|WGS:JACGCM|KingUnif05069.1	GO:0004674(protein serine/threonine kinase activity);GO:0005634(nucleus);GO:0005737(cytoplasm);GO:0005886(plasma membrane);GO:0035556(intracellular signal transduction)	NA	NA	NA	Phototropin-2 [Dichanthelium oligosanthes]	NA	1.92056	1.51206	2.53612	3.51265	3.69423	4.66861	0	0	0	1.20618e-12	1.81227e-10	yes
gene-GIB67_028695	GIB67_028695	13149	rna-gnl|WGS:JACGCM|KingUnif40692.1	GO:0003333(amino acid transmembrane transport);GO:0005886(plasma membrane);GO:0015171(amino acid transmembrane transporter activity)	04075(Plant hormone signal transduction)	K13946	NA	auxin transporter-like protein 5 [Quercus suber]	NA	0.03589	0	0.049267	23.2566	3.78309	38.1732	7.64201	0.91602	0.909455	1.46908e-12	2.19172e-10	yes
gene-GIB67_030321	GIB67_030321	26666	rna-gnl|WGS:JACGCM|KingUnif19342.1	GO:0033809(anthocyanin 6''-O-malonyltransferase activity)	00944(Flavone and flavonol biosynthesis);00943(Isoflavonoid biosynthesis)	K13264	EC:2.3.1.115	hypothetical protein AQUCO_00800032v1 [Aquilegia coerulea]	NA	0.048576	0	0.025444	1.03905	3.18282	3.11896	8.6705	27.2111	2.14801	1.48e-12	2.19258e-10	yes
gene-GIB67_013592	GIB67_013592	43072	rna-gnl|WGS:JACGCM|KingUnif08310.1	GO:0004364(glutathione transferase activity);GO:0005737(cytoplasm);GO:0006749(glutathione metabolic process);GO:0009407(toxin catabolic process)	00480(Glutathione metabolism)	K00799	EC:2.5.1.18	hypothetical protein MANES_03G155300 [Manihot esculenta]	NA	0	0	0	2.56842	8.5802	2.26129	6.35498	12.0534	5.6558	1.59339e-12	2.3316e-10	yes
gene-GIB67_026866	GIB67_026866	26238	rna-gnl|WGS:JACGCM|KingUnif05460.1	NA	NA	NA	NA	hypothetical protein AQUCO_01700712v1 [Aquilegia coerulea]	NA	139.636	233.957	113.933	4.34198	7.32378	5.52379	25.9909	99.9993	47.1723	1.59586e-12	2.3316e-10	yes
gene-GIB67_029940	GIB67_029940	17382	rna-gnl|WGS:JACGCM|KingUnif00653.1	GO:0000139(Golgi membrane);GO:0005739(mitochondrion);GO:0005794(Golgi apparatus);GO:0005976(polysaccharide metabolic process);GO:0009808(lignin metabolic process);GO:0016021(integral component of membrane);GO:0030775(glucuronoxylan 4-O-methyltransferase activity);GO:0032259(methylation);GO:0045491(xylan metabolic process);GO:0045492(xylan biosynthetic process)	NA	NA	NA	putative polysaccharide biosynthesis protein [Macleaya cordata]	NA	0	0	0	0.39509	0.275047	0.462926	6.95497	5.35797	1.92181	1.62601e-12	2.35939e-10	yes
gene-GIB67_016157	GIB67_016157	13364	rna-gnl|WGS:JACGCM|KingUnif14937.1	GO:0005789(endoplasmic reticulum membrane);GO:0006636(unsaturated fatty acid biosynthetic process);GO:0009507(chloroplast);GO:0009579(thylakoid);GO:0009979(16:0 monogalactosyldiacylglycerol desaturase activity);GO:0010205(photoinhibition);GO:0016021(integral component of membrane);GO:0016491(oxidoreductase activity);GO:0016717(oxidoreductase activity, acting on paired donors, with oxidation of a …	NA	NA	NA	delta-9 fatty acid desaturase [Vernicia fordii]	NA	0	0.270536	0	0.361916	1.93683	2.13081	13.3803	291.87	14.5619	1.73043e-12	2.48659e-10	yes
gene-GIB67_022733	GIB67_022733	1576	rna-gnl|WGS:JACGCM|KingUnif11139.1	GO:0005887(integral component of plasma membrane);GO:0015116(sulfate transmembrane transporter activity)	NA	NA	NA	STAS domain [Macleaya cordata]	NA	10.0807	34.0832	12.7799	0.777636	5.30143	1.88175	0.159012	0.439797	0.150493	1.74479e-12	2.48659e-10	yes
gene-GIB67_040713	GIB67_040713	43254	rna-gnl|WGS:JACGCM|KingUnif20941.1	GO:0005515(protein binding)	NA	NA	NA	MADS-box protein SOC1 [Herrania umbratica]	NA	0	0	0	1.54186	10.2097	3.55281	8.64114	22.4038	5.51801	1.74889e-12	2.48659e-10	yes
gene-GIB67_031507	GIB67_031507	20814	rna-gnl|WGS:JACGCM|KingUnif13529.1	GO:0005634(nucleus);GO:0009625(response to insect);GO:0030246(carbohydrate binding);GO:0043394(proteoglycan binding)	NA	NA	NA	PP2 domain-containing protein [Cephalotus follicularis]	NA	128.475	550.321	361.3	1.44318	6.45486	5.8358	9.17089	51.525	5.56702	1.94421e-12	2.74587e-10	yes
gene-GIB67_009426	GIB67_009426	15752	rna-gnl|WGS:JACGCM|KingUnif28895.1	GO:0005737(cytoplasm);GO:0010345(suberin biosynthetic process);GO:0016740(transferase activity);GO:0016747(transferase activity, transferring acyl groups other than amino-acyl groups);GO:0050734(hydroxycinnamoyltransferase activity);GO:0052325(cell wall pectin biosynthetic process);GO:0102406(omega-hydroxypalmitate O-sinapoyl transferase activity)	00073(Cutin, suberine and wax biosynthesis)	K15400	EC:2.3.1.188	PREDICTED: omega-hydroxypalmitate O-feruloyl transferase-like [Nelumbo nucifera]	NA	0.15338	1.0881	0.383348	0.88627	1.02528	3.18303	11.2675	119.223	12.0775	1.96991e-12	2.76375e-10	yes
gene-GIB67_000775	GIB67_000775	4427	rna-gnl|WGS:JACGCM|KingUnif02727.1	GO:0004190(aspartic-type endopeptidase activity);GO:0006508(proteolysis);GO:0030163(protein catabolic process)	NA	NA	NA	Peptidase A1 [Macleaya cordata]	NA	0.346009	0.152448	0.034963	1.46342	1.42718	2.95819	19.0487	8.33302	14.2522	2.00281e-12	2.79142e-10	yes
gene-GIB67_029889	GIB67_029889	19901	rna-gnl|WGS:JACGCM|KingUnif20875.1	GO:0005737(cytoplasm);GO:0005739(mitochondrion);GO:0007568(aging);GO:0008794(arsenate reductase (glutaredoxin) activity);GO:0030611(arsenate reductase activity);GO:0055114(oxidation-reduction process);GO:0071722(detoxification of arsenic-containing substance)	NA	NA	NA	Rhodanese-like domain [Macleaya cordata]	NA	64.2102	15.8447	31.3685	0.130245	0.24384	0.716664	2.87864	13.9519	3.23753	2.3073e-12	3.19478e-10	yes
gene-GIB67_016889	GIB67_016889	27732	rna-gnl|WGS:JACGCM|KingUnif39262.1	GO:0005618(cell wall);GO:0009506(plasmodesma);GO:0010497(plasmodesmata-mediated intercellular transport);GO:0033609(oxalate metabolic process);GO:0046564(oxalate decarboxylase activity);GO:2000280(regulation of root development)	00450(Selenocompound metabolism)	K00384	EC:1.8.1.9	germin-like protein 2 precursor [Cinnamomum micranthum f. kanehirae]	NA	2.10702	4.98154	11.4629	32.9593	99.413	39.3973	275.526	339.487	167.589	2.36234e-12	3.24975e-10	yes
gene-GIB67_014610	GIB67_014610	6118	rna-gnl|WGS:JACGCM|KingUnif35509.1	GO:0010334(sesquiterpene synthase activity);GO:0033383(geranyl diphosphate metabolic process)	00909(Sesquiterpenoid and triterpenoid biosynthesis)	K15803	EC:4.2.3.75	hypothetical protein VITISV_030783 [Vitis vinifera]	NA	0	0.120618	0.040769	0.192171	0.263991	1.03865	4.70115	61.7467	2.70497	2.38841e-12	3.26441e-10	yes
gene-GIB67_005860	GIB67_005860	27178	rna-gnl|WGS:JACGCM|KingUnif06465.1	NA	NA	NA	NA		NA	2.61161	19.1898	9.39691	0	0	0	0	0.19782	0	2.44947e-12	3.32641e-10	yes
gene-GIB67_030489	GIB67_030489	1943	rna-gnl|WGS:JACGCM|KingUnif27691.1	GO:0003677(DNA binding);GO:0003700(DNA binding transcription factor activity);GO:0005515(protein binding);GO:0005634(nucleus);GO:0006351(transcription, DNA-templated);GO:0006355(regulation of transcription, DNA-templated);GO:0009723(response to ethylene);GO:0009733(response to auxin);GO:0009734(auxin-activated signaling pathway);GO:0010311(lateral root formation);GO:0043565(sequence-specific DNA …	04075(Plant hormone signal transduction)	K14486	NA	PREDICTED: auxin response factor 19 [Beta vulgaris subsp. vulgaris]	NA	2.68993	3.07327	5.77783	5.56057	3.48738	3.55172	0	0	0	2.49288e-12	3.3638e-10	yes
gene-GIB67_042416	GIB67_042416	26110	rna-gnl|WGS:JACGCM|KingUnif24863.1	NA	NA	NA	NA	hypothetical protein BVC80_243g47 [Macleaya cordata]	NA	7.96006	84.3479	37.8467	0.662625	0.814675	1.51175	3.44682	6.44972	1.42378	2.65971e-12	3.5662e-10	yes
gene-GIB67_001791	GIB67_001791	37118	rna-gnl|WGS:JACGCM|KingUnif33724.1	GO:0005576(extracellular region);GO:0006869(lipid transport);GO:0008289(lipid binding)	NA	NA	NA	Bifunctional inhibitor/plant lipid transfer protein/seed storage helical domain [Macleaya cordata]	NA	5.43049	6.81626	2.36858	13.1396	42.4233	115.874	289.116	945.814	132.096	2.88398e-12	3.84258e-10	yes
gene-GIB67_029330	GIB67_029330	13787	rna-gnl|WGS:JACGCM|KingUnif31357.1	GO:0005634(nucleus);GO:0016787(hydrolase activity)	00760(Nicotinate and nicotinamide metabolism)	K18551	EC:3.1.3.-	uncharacterized protein C24B11.05-like [Durio zibethinus]	NA	84.2615	11.0498	105.306	1.18673	0.86979	1.72277	3.30498	12.0507	2.63253	3.76904e-12	4.99045e-10	yes
gene-GIB67_028222	GIB67_028222	41510	rna-gnl|WGS:JACGCM|KingUnif11739.1	GO:0008194(UDP-glycosyltransferase activity);GO:0009813(flavonoid biosynthetic process);GO:0043231(intracellular membrane-bounded organelle);GO:0052696(flavonoid glucuronidation)	NA	NA	NA	UDPGT domain-containing protein [Cephalotus follicularis]	NA	0.29384	0.106478	0.688467	2.27488	4.03747	5.93264	39.0608	20.3895	9.20196	4.20244e-12	5.52973e-10	yes
gene-GIB67_022352	GIB67_022352	14474	rna-gnl|WGS:JACGCM|KingUnif27462.1	GO:0051213(dioxygenase activity)	00941(Flavonoid biosynthesis)	K05278	EC:1.14.20.6	Isopenicillin N synthase [Macleaya cordata]	NA	3.73711	0.696606	0.739243	17.2346	34.6374	48.8225	171.536	52.0261	105.897	4.53461e-12	5.92998e-10	yes
gene-GIB67_042137	GIB67_042137	8377	rna-gnl|WGS:JACGCM|KingUnif31018.1	GO:0005783(endoplasmic reticulum);GO:0010025(wax biosynthetic process);GO:0010143(cutin biosynthetic process);GO:0043668(exine);GO:0048653(anther development)	00073(Cutin, suberine and wax biosynthesis)	K15404	EC:4.1.99.5	Fatty acid hydroxylase [Macleaya cordata]	NA	0.164341	0.03784	0	46.0795	0.754766	89.5338	0.10309	0.14163	0.981027	4.57601e-12	5.94741e-10	yes
gene-GIB67_035953	GIB67_035953	16373	rna-gnl|WGS:JACGCM|KingUnif14770.1	GO:0003779(actin binding);GO:0005737(cytoplasm);GO:0005739(mitochondrion)	NA	NA	NA	hypothetical protein AQUCO_00201444v1 [Aquilegia coerulea]	NA	0	0	0	7.87944	0.131395	20.5655	0.412225	0.139552	0.292871	4.75006e-12	6.13598e-10	yes
gene-GIB67_026740	GIB67_026740	22827	rna-gnl|WGS:JACGCM|KingUnif18711.1	GO:0005345(purine nucleobase transmembrane transporter activity);GO:0006863(purine nucleobase transport);GO:0009507(chloroplast);GO:0016020(membrane);GO:0016021(integral component of membrane)	00010(Glycolysis / Gluconeogenesis);00030(Pentose phosphate pathway);00051(Fructose and mannose metabolism);00052(Galactose metabolism);03018(RNA degradation)	K00850	EC:2.7.1.11	hypothetical protein AQUCO_01000091v1 [Aquilegia coerulea]	NA	0	0	0	0.791605	1.19103	7.47927	22.7845	5.71666	2.38727	5.56111e-12	7.12103e-10	yes
gene-GIB67_019582	GIB67_019582	16581	rna-gnl|WGS:JACGCM|KingUnif08559.1	GO:0004674(protein serine/threonine kinase activity);GO:0004675(transmembrane receptor protein serine/threonine kinase activity);GO:0005515(protein binding);GO:0005654(nucleoplasm);GO:0005737(cytoplasm);GO:0005886(plasma membrane);GO:0007166(cell surface receptor signaling pathway);GO:0010091(trichome branching);GO:0016301(kinase activity);GO:0046777(protein autophosphorylation);GO:0050832(defens…	NA	NA	NA	hypothetical protein AQUCO_00700516v1 [Aquilegia coerulea]	NA	0.96034	0.581371	0.792463	11.9445	9.90392	9.32208	17.9563	14.0026	19.8598	5.57985e-12	7.12103e-10	yes
gene-GIB67_001785	GIB67_001785	37111	rna-gnl|WGS:JACGCM|KingUnif14248.1	NA	NA	NA	NA	hypothetical protein AQUCO_00600393v1 [Aquilegia coerulea]	NA	1.73742	13.6883	26.0576	0	0	0.106398	0.225674	0.208116	0.095126	6.50624e-12	8.25357e-10	yes
gene-GIB67_012718	GIB67_012718	11268	rna-gnl|WGS:JACGCM|KingUnif19806.1	GO:0005737(cytoplasm);GO:0016491(oxidoreductase activity);GO:0055114(oxidation-reduction process)	00906(Carotenoid biosynthesis)	K09841	EC:1.1.1.288	hypothetical protein AQUCO_00400219v1 [Aquilegia coerulea]	NA	0.071868	0.089965	0	1.85242	1.11658	12.1666	53.0646	8.63246	16.707	6.59319e-12	8.31409e-10	yes
gene-GIB67_033299	GIB67_033299	25539	rna-gnl|WGS:JACGCM|KingUnif41925.1	GO:0000139(Golgi membrane);GO:0005794(Golgi apparatus);GO:0016021(integral component of membrane);GO:0016051(carbohydrate biosynthetic process);GO:0016757(transferase activity, transferring glycosyl groups);GO:0045489(pectin biosynthetic process);GO:0047262(polygalacturonate 4-alpha-galacturonosyltransferase activity);GO:0071555(cell wall organization)	00520(Amino sugar and nucleotide sugar metabolism)	K13648	EC:2.4.1.43	hypothetical protein DVH24_010674 [Malus domestica]	NA	67.2847	31.4071	178.515	10.1904	6.84208	12.3883	7.26529	4.94593	5.93342	8.54199e-12	1.06592e-09	yes
gene-GIB67_020751	GIB67_020751	26282	rna-gnl|WGS:JACGCM|KingUnif11370.1	GO:0004497(monooxygenase activity);GO:0005506(iron ion binding);GO:0005575(cellular_component);GO:0016705(oxidoreductase activity, acting on paired donors, with incorporation or reduction of molecular oxygen);GO:0019825(oxygen binding);GO:0020037(heme binding);GO:0055114(oxidation-reduction process)	00073(Cutin, suberine and wax biosynthesis)	K15402	EC:1.14.-.-	cytochrome P450 86B1-like [Coffea eugenioides]	NA	0.124926	0.064438	0	19.7672	0.119098	41.1397	0.04404	0.060362	0	8.55352e-12	1.06592e-09	yes
gene-GIB67_031294	GIB67_031294	2407	rna-gnl|WGS:JACGCM|KingUnif32169.1	NA	NA	NA	NA		NA	0	0.144582	0	0.482775	3.25996	1.87041	23.0301	11.3758	54.7616	8.60675e-12	1.06628e-09	yes
gene-GIB67_009652	GIB67_009652	37268	rna-gnl|WGS:JACGCM|KingUnif26712.1	GO:0005634(nucleus);GO:0008150(biological_process);GO:0008483(transaminase activity)	NA	NA	NA	hypothetical protein BVC80_8257g5 [Macleaya cordata]	NA	2.60368	1.43982	1.36938	0.774143	1.54326	6.41939	74.6193	50.5626	20.8888	9.26912e-12	1.14166e-09	yes
gene-GIB67_033454	GIB67_033454	31219	rna-gnl|WGS:JACGCM|KingUnif38140.1	GO:0051213(dioxygenase activity)	00904(Diterpenoid biosynthesis)	K04125	EC:1.14.11.13	2-oxoglutarate-dependent dioxygenase [Actinidia chinensis var. chinensis]	NA	1.09903	0.334493	2.94988	15.8273	62.9037	43.6861	69.0299	284.523	66.838	1.15697e-11	1.41679e-09	yes
gene-GIB67_019077	GIB67_019077	16739	rna-gnl|WGS:JACGCM|KingUnif05155.1	GO:0004497(monooxygenase activity);GO:0005506(iron ion binding);GO:0005783(endoplasmic reticulum);GO:0016021(integral component of membrane);GO:0016705(oxidoreductase activity, acting on paired donors, with incorporation or reduction of molecular oxygen);GO:0019825(oxygen binding);GO:0020037(heme binding);GO:0055114(oxidation-reduction process)	00071(Fatty acid degradation);00073(Cutin, suberine and wax biosynthesis)	K20495	EC:1.14.14.80	Cytochrome P450 [Macleaya cordata]	NA	0.671086	0.191625	1.22545	1.44205	3.53589	2.63311	20.6138	22.1076	16.3597	1.18872e-11	1.4473e-09	yes
gene-GIB67_023356	GIB67_023356	34831	rna-gnl|WGS:JACGCM|KingUnif15155.1	GO:0003677(DNA binding);GO:0005634(nucleus);GO:0005737(cytoplasm);GO:0006351(transcription, DNA-templated);GO:0006355(regulation of transcription, DNA-templated);GO:0009554(megasporogenesis);GO:0009556(microsporogenesis);GO:0030154(cell differentiation);GO:0046872(metal ion binding);GO:0048653(anther development)	NA	NA	NA	hypothetical protein AQUCO_02400116v1 [Aquilegia coerulea]	NA	0	0	0	3.13584	0.051818	10.404	0	0	0	1.21667e-11	1.47286e-09	yes
gene-GIB67_006697	GIB67_006697	29393	rna-gnl|WGS:JACGCM|KingUnif23273.1	GO:0003677(DNA binding);GO:0003700(DNA binding transcription factor activity);GO:0005634(nucleus);GO:0006351(transcription, DNA-templated);GO:0006355(regulation of transcription, DNA-templated)	04933(AGE-RAGE signaling pathway in diabetic complications)	K06236	NA	hypothetical protein CISIN_1g013552mg [Citrus sinensis]	NA	9.99318	32.9512	44.2479	0.472697	0.701166	1.25383	2.1478	4.5432	0.746801	1.22757e-11	1.47762e-09	yes
gene-GIB67_036907	GIB67_036907	5870	rna-gnl|WGS:JACGCM|KingUnif11633.1	GO:0005515(protein binding);GO:0005634(nucleus);GO:0005783(endoplasmic reticulum);GO:0009555(pollen development);GO:0010584(pollen exine formation);GO:0016491(oxidoreductase activity);GO:0048316(seed development);GO:0050662(coenzyme binding);GO:0055114(oxidation-reduction process);GO:0080110(sporopollenin biosynthetic process)	00941(Flavonoid biosynthesis)	K13082	EC:1.1.1.219;EC:1.1.1.234	NAD-dependent epimerase/dehydratase [Macleaya cordata]	NA	0	0	0	0.654811	1.21057	0.653903	4.23423	7.90801	4.39296	1.3221e-11	1.58242e-09	yes
gene-GIB67_027964	GIB67_027964	35469	rna-gnl|WGS:JACGCM|KingUnif25610.1	GO:0004623(phospholipase A2 activity);GO:0005509(calcium ion binding);GO:0005515(protein binding);GO:0005576(extracellular region);GO:0005634(nucleus);GO:0005773(vacuole);GO:0005794(Golgi apparatus);GO:0006644(phospholipid metabolic process);GO:0016042(lipid catabolic process);GO:0031410(cytoplasmic vesicle);GO:0050482(arachidonic acid secretion);GO:0102567(phospholipase A2 activity (consuming 1,…	00564(Glycerophospholipid metabolism);00565(Ether lipid metabolism);00590(Arachidonic acid metabolism);00591(Linoleic acid metabolism);00592(alpha-Linolenic acid metabolism)	K01047	EC:3.1.1.4	phospholipase A2-alpha-like [Papaver somniferum]	NA	1.53752	0.630799	0.529499	50.8088	34.8027	65.7383	74.9271	9.5224	33.9137	1.33003e-11	1.58296e-09	yes
gene-GIB67_030542	GIB67_030542	39539	rna-gnl|WGS:JACGCM|KingUnif21030.1	GO:0004601(peroxidase activity);GO:0009505(plant-type cell wall);GO:0009664(plant-type cell wall organization)	00940(Phenylpropanoid biosynthesis)	K00430	EC:1.11.1.7	PREDICTED: peroxidase 5-like [Fragaria vesca subsp. vesca]	NA	0	0.025887	0.304836	16.7367	23.531	13.7688	10.1897	7.00135	8.36089	1.34888e-11	1.59642e-09	yes
gene-GIB67_042192	GIB67_042192	36252	rna-gnl|WGS:JACGCM|KingUnif02848.1	GO:0003674(molecular_function);GO:0005634(nucleus);GO:0008150(biological_process)	NA	NA	NA	PREDICTED: uncharacterized protein LOC104604799 isoform X1 [Nelumbo nucifera]	NA	0	0	0.089618	1.5719	3.36695	4.33044	14.5259	19.9231	3.79143	1.42225e-11	1.67391e-09	yes
gene-GIB67_006739	GIB67_006739	29433	rna-gnl|WGS:JACGCM|KingUnif05555.1	GO:0004683(calmodulin-dependent protein kinase activity);GO:0005516(calmodulin binding);GO:0005634(nucleus);GO:0005737(cytoplasm);GO:0009931(calcium-dependent protein serine/threonine kinase activity);GO:0018105(peptidyl-serine phosphorylation);GO:0035556(intracellular signal transduction);GO:0046777(protein autophosphorylation)	04626(Plant-pathogen interaction)	K13412	EC:2.7.11.1	Protein kinase domain [Macleaya cordata]	NA	1.75035	1.09923	3.74857	10.5836	22.8946	9.74737	40.5293	56.4171	44.7133	1.52555e-11	1.78557e-09	yes
gene-GIB67_020708	GIB67_020708	4061	rna-gnl|WGS:JACGCM|KingUnif13949.1	GO:0005886(plasma membrane);GO:0016301(kinase activity);GO:0016310(phosphorylation)	NA	NA	NA	hypothetical protein AQUCO_04100057v1 [Aquilegia coerulea]	NA	0	0	0	3.66	0.678385	1.89966	0.306865	0.252149	0.438601	1.5984e-11	1.86055e-09	yes
gene-GIB67_013501	GIB67_013501	28479	rna-gnl|WGS:JACGCM|KingUnif02915.1	GO:0004650(polygalacturonase activity);GO:0005576(extracellular region);GO:0005618(cell wall);GO:0008150(biological_process);GO:0048046(apoplast)	NA	NA	NA	BURP domain [Macleaya cordata]	NA	0.620591	0.138345	1.70286	31.277	26.0879	59.3715	123.334	22.813	127.742	1.62236e-11	1.87812e-09	yes
gene-GIB67_026761	GIB67_026761	22852	rna-gnl|WGS:JACGCM|KingUnif36799.1	GO:0005886(plasma membrane);GO:0006952(defense response)	NA	NA	NA	hypothetical protein AQUCO_01500297v1 [Aquilegia coerulea]	NA	0	0	0	0.559126	0.630503	1.63354	4.61216	1.21026	1.41743	1.70514e-11	1.96323e-09	yes
gene-GIB67_000341	GIB67_000341	36978	rna-gnl|WGS:JACGCM|KingUnif36042.1	GO:0004197(cysteine-type endopeptidase activity);GO:0005615(extracellular space);GO:0005764(lysosome);GO:0051603(proteolysis involved in cellular protein catabolic process)	NA	NA	NA	probable cysteine protease RD19D [Ziziphus jujuba]	NA	0.123509	0.264937	0	18.5715	0.737626	14.0118	0.050618	0.060175	0.080636	1.72356e-11	1.96801e-09	yes
gene-GIB67_035049	GIB67_035049	40699	rna-gnl|WGS:JACGCM|KingUnif13283.1	GO:0004674(protein serine/threonine kinase activity);GO:0005886(plasma membrane);GO:0006468(protein phosphorylation);GO:0006952(defense response);GO:0009506(plasmodesma)	NA	NA	NA	Protein kinase domain [Macleaya cordata]	NA	3.2057	31.9275	33.8833	10.3543	1.12706	1.92108	0.176891	0.081513	0.13055	1.72787e-11	1.96801e-09	yes
gene-GIB67_017619	GIB67_017619	33215	rna-gnl|WGS:JACGCM|KingUnif10092.1	GO:0005509(calcium ion binding)	04626(Plant-pathogen interaction)	K13448	NA	hypothetical protein AQUCO_00700642v1 [Aquilegia coerulea]	NA	25.6265	52.7654	105.758	2.28349	3.16714	2.82018	6.57025	11.684	4.3446	2.0489e-11	2.32117e-09	yes
gene-GIB67_030331	GIB67_030331	26670	rna-gnl|WGS:JACGCM|KingUnif13072.1	GO:0000139(Golgi membrane);GO:0005794(Golgi apparatus);GO:0016021(integral component of membrane);GO:0016051(carbohydrate biosynthetic process);GO:0016757(transferase activity, transferring glycosyl groups);GO:0045489(pectin biosynthetic process);GO:0047262(polygalacturonate 4-alpha-galacturonosyltransferase activity);GO:0071555(cell wall organization)	00520(Amino sugar and nucleotide sugar metabolism)	K13648	EC:2.4.1.43	PREDICTED: probable galacturonosyltransferase 6 isoform X1 [Nelumbo nucifera]	NA	44.6181	31.149	133.577	10.068	9.49531	11.0113	5.67258	4.35652	4.94821	2.16316e-11	2.43758e-09	yes
gene-GIB67_020257	GIB67_020257	3106	rna-gnl|WGS:JACGCM|KingUnif38018.1	GO:0009813(flavonoid biosynthetic process);GO:0043231(intracellular membrane-bounded organelle);GO:0052696(flavonoid glucuronidation);GO:0080043(quercetin 3-O-glucosyltransferase activity);GO:0080044(quercetin 7-O-glucosyltransferase activity)	NA	NA	NA	UDP-glycosyltransferase 85K10 [Camellia sinensis]	NA	9.57529	161.717	92.1031	25.7371	9.67442	35.0108	0.311681	1.38833	0.463635	2.31564e-11	2.5956e-09	yes
gene-GIB67_027468	GIB67_027468	23663	rna-gnl|WGS:JACGCM|KingUnif42990.1	GO:0005886(plasma membrane);GO:0016021(integral component of membrane);GO:0042626(ATPase activity, coupled to transmembrane movement of substances)	02010(ABC transporters)	K05681	NA	hypothetical protein AQUCO_04500059v1 [Aquilegia coerulea]	NA	0.458779	2.12141	1.28859	22.0891	29.9332	13.724	26.8642	33.2413	36.7562	2.37355e-11	2.64651e-09	yes
gene-GIB67_029845	GIB67_029845	10024	rna-gnl|WGS:JACGCM|KingUnif25962.1	GO:0003954(NADH dehydrogenase activity);GO:0009060(aerobic respiration);GO:0010181(FMN binding);GO:0051287(NAD binding);GO:0051539(4 iron, 4 sulfur cluster binding)	NA	NA	NA	diacylglycerol O-acyltransferase 3, cytosolic-like [Durio zibethinus]	NA	13.2889	24.5998	23.8755	0.636357	0.305419	1.1403	1.96212	3.323	1.14107	2.41334e-11	2.67501e-09	yes
gene-GIB67_005917	GIB67_005917	24863	rna-gnl|WGS:JACGCM|KingUnif00920.1	GO:0012505(endomembrane system);GO:0016787(hydrolase activity);GO:1990019(protein storage vacuole organization)	NA	NA	NA	hypothetical protein TorRG33x02_131260 [Trema orientale]	NA	0	0	0	13.0313	0	38.2509	0	0	0	2.42436e-11	2.67501e-09	yes
gene-GIB67_037051	GIB67_037051	35020	rna-gnl|WGS:JACGCM|KingUnif06315.1	GO:0003677(DNA binding);GO:0003700(DNA binding transcription factor activity);GO:0005634(nucleus);GO:0006351(transcription, DNA-templated);GO:0006355(regulation of transcription, DNA-templated);GO:0046983(protein dimerization activity)	04016(MAPK signaling pathway - plant);04075(Plant hormone signal transduction)	K13422	NA	transcription factor bHLH18-like protein [Cinnamomum micranthum f. kanehirae]	NA	0.271805	0.25096	0.258066	2.54803	2.43433	16.3966	46.1654	23.7836	10.1578	2.58905e-11	2.84192e-09	yes
gene-GIB67_038087	GIB67_038087	1599	rna-gnl|WGS:JACGCM|KingUnif02411.1	GO:0005737(cytoplasm);GO:0005739(mitochondrion);GO:0007568(aging);GO:0008794(arsenate reductase (glutaredoxin) activity);GO:0030611(arsenate reductase activity);GO:0055114(oxidation-reduction process);GO:0071722(detoxification of arsenic-containing substance)	NA	NA	NA	Rhodanese-like domain [Macleaya cordata]	NA	56.7074	25.5822	69.7976	0.407865	1.16769	0.344774	0.292159	2.67299	8.95416	2.71615e-11	2.96606e-09	yes
gene-GIB67_001826	GIB67_001826	37157	rna-gnl|WGS:JACGCM|KingUnif34391.1	GO:0005774(vacuolar membrane);GO:0005886(plasma membrane);GO:0009832(plant-type cell wall biogenesis);GO:0009834(plant-type secondary cell wall biogenesis);GO:0010215(cellulose microfibril organization);GO:0016049(cell growth);GO:0031225(anchored component of membrane)	NA	NA	NA	COBRA-like protein 4 [Papaver somniferum]	NA	0	0	0	0.045467	0.448157	1.05732	5.37608	4.07544	3.57819	2.74695e-11	2.97006e-09	yes
gene-GIB67_040838	GIB67_040838	2895	rna-gnl|WGS:JACGCM|KingUnif06506.1	GO:0005634(nucleus);GO:0005737(cytoplasm)	00260(Glycine, serine and threonine metabolism);00350(Tyrosine metabolism);00360(Phenylalanine metabolism);00410(beta-Alanine metabolism);00950(Isoquinoline alkaloid biosynthesis);00960(Tropane, piperidine and pyridine alkaloid biosynthesis)	K00276	EC:1.4.3.21	Armadillo [Macleaya cordata]	NA	11.2226	16.0908	18.039	0.735155	0.959906	1.3589	1.22439	2.38817	0.547644	2.74785e-11	2.97006e-09	yes
gene-GIB67_013441	GIB67_013441	32178	rna-gnl|WGS:JACGCM|KingUnif02964.1	GO:0003674(molecular_function);GO:0005576(extracellular region);GO:0008150(biological_process)	NA	NA	NA	PREDICTED: uncharacterized protein LOC104594245 [Nelumbo nucifera]	NA	0	0	0	0.385582	1.81623	1.82755	7.32105	3.74385	16.5161	2.86771e-11	3.08388e-09	yes
gene-GIB67_018912	GIB67_018912	40274	rna-gnl|WGS:JACGCM|KingUnif14733.1	GO:0005618(cell wall);GO:0005773(vacuole);GO:0005783(endoplasmic reticulum);GO:0005886(plasma membrane);GO:0009506(plasmodesma);GO:0016020(membrane);GO:0016021(integral component of membrane);GO:0022857(transmembrane transporter activity);GO:0055085(transmembrane transport)	NA	NA	NA	hypothetical protein AQUCO_06000042v1 [Aquilegia coerulea]	NA	0	0	0	3.84058	0.90054	3.82816	6.16722	4.16022	10.4822	3.21477e-11	3.43964e-09	yes
gene-GIB67_000976	GIB67_000976	23384	rna-gnl|WGS:JACGCM|KingUnif43100.1	GO:0005737(cytoplasm);GO:0030001(metal ion transport);GO:0046914(transition metal ion binding);GO:0046916(cellular transition metal ion homeostasis)	NA	NA	NA	heavy metal-associated isoprenylated plant protein 7-like [Papaver somniferum]	NA	5.24561	118.701	75.297	2.42441	0.127436	2.23036	1.92402	0.611864	0.81454	3.27427e-11	3.46634e-09	yes
gene-GIB67_015289	GIB67_015289	19301	rna-gnl|WGS:JACGCM|KingUnif25658.1	GO:0001708(cell fate specification);GO:0003700(DNA binding transcription factor activity);GO:0005515(protein binding);GO:0005634(nucleus);GO:0006355(regulation of transcription, DNA-templated);GO:0010051(xylem and phloem pattern formation);GO:0010089(xylem development);GO:0043565(sequence-specific DNA binding);GO:0045165(cell fate commitment)	NA	NA	NA	Homeobox protein knotted-1-like 2 [Vitis vinifera]	NA	0.367986	1.62583	0.233496	17.4628	45.2546	25.6118	46.5759	26.9675	31.2889	3.27527e-11	3.46634e-09	yes
gene-GIB67_042337	GIB67_042337	36394	rna-gnl|WGS:JACGCM|KingUnif16868.1	GO:0009813(flavonoid biosynthetic process);GO:0043231(intracellular membrane-bounded organelle);GO:0052696(flavonoid glucuronidation);GO:0080043(quercetin 3-O-glucosyltransferase activity);GO:0080044(quercetin 7-O-glucosyltransferase activity)	NA	NA	NA	PREDICTED: hydroquinone glucosyltransferase [Nelumbo nucifera]	NA	0.015818	0.380415	0.020678	4.16511	23.5231	2.62427	40.6834	46.8211	42.4267	3.28881e-11	3.46634e-09	yes
gene-GIB67_039584	GIB67_039584	2151	rna-gnl|WGS:JACGCM|KingUnif27470.1	GO:0000139(Golgi membrane);GO:0000271(polysaccharide biosynthetic process);GO:0000977(RNA polymerase II regulatory region sequence-specific DNA binding);GO:0005794(Golgi apparatus);GO:0005886(plasma membrane);GO:0009833(plant-type primary cell wall biogenesis);GO:0016021(integral component of membrane);GO:0016740(transferase activity);GO:0016757(transferase activity, transferring glycosyl groups)…	NA	NA	NA	hypothetical protein AQUCO_01700672v1 [Aquilegia coerulea]	NA	5.09755	30.8412	64.8764	1.067	2.78635	1.53471	0.812784	2.42319	0.708846	3.34465e-11	3.50774e-09	yes
gene-GIB67_024644	GIB67_024644	32877	rna-gnl|WGS:JACGCM|KingUnif21185.1	GO:0005737(cytoplasm);GO:0005794(Golgi apparatus);GO:0006952(defense response);GO:0008146(sulfotransferase activity);GO:0009651(response to salt stress);GO:0009751(response to salicylic acid);GO:0016131(brassinosteroid metabolic process);GO:0080118(brassinosteroid sulfotransferase activity);GO:1990135(flavonoid sulfotransferase activity)	NA	NA	NA	hypothetical protein AQUCO_07900005v1 [Aquilegia coerulea]	NA	2.85654	0.85077	1.29333	0.715034	2.89017	4.38769	61.0151	37.1114	18.557	3.41932e-11	3.56136e-09	yes
gene-GIB67_037474	GIB67_037474	3621	rna-gnl|WGS:JACGCM|KingUnif16591.1	GO:0002213(defense response to insect);GO:0003824(catalytic activity);GO:0004806(triglyceride lipase activity);GO:0005576(extracellular region);GO:0016042(lipid catabolic process);GO:0016298(lipase activity)	00100(Steroid biosynthesis)	K01052	EC:3.1.1.13	triacylglycerol lipase 2-like [Papaver somniferum]	NA	18.4238	43.3592	7.56364	0.054832	0.071897	0	0.460994	5.61233	0.247525	3.43834e-11	3.56136e-09	yes
gene-GIB67_035377	GIB67_035377	21157	rna-gnl|WGS:JACGCM|KingUnif12960.1	GO:0003674(molecular_function);GO:0008150(biological_process);GO:0009507(chloroplast)	NA	NA	NA	hypothetical protein AQUCO_00900685v1 [Aquilegia coerulea]	NA	35.359	274.395	153.155	2.75447	7.75911	6.75512	6.54218	19.43	3.45241	3.44621e-11	3.56136e-09	yes
gene-GIB67_003223	GIB67_003223	35342	rna-gnl|WGS:JACGCM|KingUnif00898.1	GO:0005576(extracellular region);GO:0005618(cell wall);GO:0005794(Golgi apparatus);GO:0005829(cytosol);GO:0006952(defense response);GO:0007165(signal transduction);GO:0009505(plant-type cell wall);GO:0009506(plasmodesma);GO:0016020(membrane);GO:0090353(polygalacturonase inhibitor activity)	NA	NA	NA	hypothetical protein AQUCO_00900341v1 [Aquilegia coerulea]	NA	4.79393	1.61003	2.45294	6.22173	32.6944	19.1993	36.1755	136.515	127.265	3.52898e-11	3.62919e-09	yes
gene-GIB67_017209	GIB67_017209	9466	rna-gnl|WGS:JACGCM|KingUnif39389.1	GO:0005737(cytoplasm);GO:0005739(mitochondrion);GO:0005975(carbohydrate metabolic process);GO:0006099(tricarboxylic acid cycle);GO:0006107(oxaloacetate metabolic process);GO:0006108(malate metabolic process);GO:0006734(NADH metabolic process);GO:0008746(NAD(P)+ transhydrogenase activity);GO:0009507(chloroplast);GO:0009570(chloroplast stroma);GO:0009579(thylakoid);GO:0009941(chloroplast envelope);…	00620(Pyruvate metabolism);00710(Carbon fixation in photosynthetic organisms)	K00051	EC:1.1.1.82	PREDICTED: malate dehydrogenase [NADP], chloroplastic-like [Nelumbo nucifera]	NA	82.6513	20.373	132.323	14.7612	6.33494	9.59422	5.35729	4.03134	3.54695	3.63858e-11	3.72383e-09	yes
gene-GIB67_039060	GIB67_039060	33906	rna-gnl|WGS:JACGCM|KingUnif18217.1	GO:0004561(alpha-N-acetylglucosaminidase activity);GO:0005773(vacuole);GO:0008152(metabolic process);GO:0009507(chloroplast);GO:0009793(embryo development ending in seed dormancy);GO:0051781(positive regulation of cell division)	00531(Glycosaminoglycan degradation)	K01205	EC:3.2.1.50	Alpha-N-acetylglucosaminidase [Macleaya cordata]	NA	0.580201	0.362594	0.627684	2.62685	4.08294	3.57672	19.3412	17.6597	11.647	3.71293e-11	3.78165e-09	yes
gene-GIB67_037283	GIB67_037283	19561	rna-gnl|WGS:JACGCM|KingUnif14887.1	GO:0005737(cytoplasm);GO:0005829(cytosol);GO:0009793(embryo development ending in seed dormancy);GO:0010090(trichome morphogenesis);GO:0010143(cutin biosynthetic process);GO:0016740(transferase activity);GO:0016747(transferase activity, transferring acyl groups other than amino-acyl groups);GO:0051179(localization);GO:0090626(plant epidermis morphogenesis)	NA	NA	NA	PREDICTED: BAHD acyltransferase DCR [Nelumbo nucifera]	NA	0	0	0.087212	18.2023	0.303557	57.3594	0.610729	0.658938	0.824518	3.74803e-11	3.79914e-09	yes
gene-GIB67_021363	GIB67_021363	24446	rna-gnl|WGS:JACGCM|KingUnif40219.1	NA	NA	NA	NA		NA	0.400984	1.55573	0.293772	32.7537	1.04927	46.441	0	0.121006	0	3.95523e-11	3.99007e-09	yes
gene-GIB67_032965	GIB67_032965	17196	rna-gnl|WGS:JACGCM|KingUnif42366.1	GO:0005886(plasma membrane);GO:0006810(transport);GO:0022857(transmembrane transporter activity)	NA	NA	NA	uncharacterized protein LOC18784409 [Prunus persica]	NA	0.069017	0.600281	0.137416	1.314	5.04068	7.3398	30.8707	12.5955	17.8447	4.32729e-11	4.34472e-09	yes
gene-GIB67_033251	GIB67_033251	20424	rna-gnl|WGS:JACGCM|KingUnif43159.1	NA	NA	NA	NA	protein RESPONSE TO LOW SULFUR 3-like [Solanum pennellii]	NA	506.002	397.112	550.174	32.9543	63.6771	55.3722	55.1532	57.7175	11.8099	4.58443e-11	4.58118e-09	yes
gene-GIB67_039476	GIB67_039476	34660	rna-gnl|WGS:JACGCM|KingUnif08086.1	GO:0005737(cytoplasm);GO:0030001(metal ion transport);GO:0046914(transition metal ion binding);GO:0046916(cellular transition metal ion homeostasis)	NA	NA	NA	PREDICTED: heavy metal-associated isoprenylated plant protein 35 [Vitis vinifera]	NA	1.36803	12.1329	39.6719	0.401298	0.224385	0.123438	0.306682	0	0.089918	4.693e-11	4.66766e-09	yes
gene-GIB67_030656	GIB67_030656	10201	rna-gnl|WGS:JACGCM|KingUnif25537.1	NA	NA	NA	NA		NA	14.9638	122.35	76.9351	114.049	3.66151	323.935	0.170254	0.234597	0.403547	4.87091e-11	4.82197e-09	yes
gene-GIB67_038086	GIB67_038086	1600	rna-gnl|WGS:JACGCM|KingUnif16409.1	GO:0005737(cytoplasm);GO:0005739(mitochondrion);GO:0007568(aging);GO:0008794(arsenate reductase (glutaredoxin) activity);GO:0030611(arsenate reductase activity);GO:0055114(oxidation-reduction process);GO:0071722(detoxification of arsenic-containing substance)	NA	NA	NA	Rhodanese-like domain [Macleaya cordata]	NA	38.6937	10.9869	50.8712	0.184301	0.610914	0.319151	0.317724	2.01391	7.10335	5.06859e-11	4.99433e-09	yes
gene-GIB67_027464	GIB67_027464	23658	rna-gnl|WGS:JACGCM|KingUnif05365.1	NA	NA	NA	NA	putative disease resistance protein RGA4 [Olea europaea var. sylvestris]	NA	0	0	0	0.19769	0.182902	0.393053	2.58909	1.24432	2.2517	5.23288e-11	5.13234e-09	yes
gene-GIB67_026813	GIB67_026813	22900	rna-gnl|WGS:JACGCM|KingUnif40112.1	GO:0004674(protein serine/threonine kinase activity);GO:0005886(plasma membrane);GO:0006468(protein phosphorylation)	NA	NA	NA	probable receptor-like protein kinase At5g20050 [Hevea brasiliensis]	NA	0	0	0	0.595569	11.9331	3.88906	0.485249	2.70166	0.276357	5.74955e-11	5.6131e-09	yes
gene-GIB67_003262	GIB67_003262	29802	rna-gnl|WGS:JACGCM|KingUnif28489.1	GO:0042802(identical protein binding)	NA	NA	NA	Protein kinase domain [Macleaya cordata]	NA	0	0.051631	0.058619	0.728776	4.8866	1.62617	6.03131	6.99539	11.9567	6.56963e-11	6.38429e-09	yes
gene-GIB67_004823	GIB67_004823	32985	rna-gnl|WGS:JACGCM|KingUnif27629.1	GO:0004601(peroxidase activity);GO:0005576(extracellular region);GO:0006979(response to oxidative stress);GO:0009809(lignin biosynthetic process);GO:0020037(heme binding);GO:0042744(hydrogen peroxide catabolic process);GO:0046872(metal ion binding);GO:0055114(oxidation-reduction process)	00940(Phenylpropanoid biosynthesis)	K00430	EC:1.11.1.7	PREDICTED: peroxidase 72-like [Nelumbo nucifera]	NA	0.312171	0.567796	0	2.22075	3.11032	5.1849	13.6022	27.4021	44.1644	7.31158e-11	7.07287e-09	yes
gene-GIB67_009346	GIB67_009346	15676	rna-gnl|WGS:JACGCM|KingUnif36718.1	GO:0005634(nucleus);GO:0016567(protein ubiquitination)	NA	NA	NA	F-box protein At1g67340-like isoform X2 [Abrus precatorius]	NA	5.99369	4.52438	8.34174	90.9991	57.0402	80.2516	27.9645	29.5396	24.5588	7.54768e-11	7.26807e-09	yes
gene-GIB67_023869	GIB67_023869	11057	rna-gnl|WGS:JACGCM|KingUnif13368.1	GO:0003674(molecular_function);GO:0009507(chloroplast);GO:0009534(chloroplast thylakoid);GO:0009535(chloroplast thylakoid membrane);GO:0009538(photosystem I reaction center);GO:0009579(thylakoid);GO:0009941(chloroplast envelope);GO:0010287(plastoglobule);GO:0015979(photosynthesis);GO:0016020(membrane);GO:0016021(integral component of membrane)	00195(Photosynthesis)	K02694	NA	Photosystem I PsaF [Macleaya cordata]	NA	250.953	101.888	185.031	24.5548	3.20915	24.5271	8.70994	2.90502	10.7033	7.61718e-11	7.30181e-09	yes
gene-GIB67_020458	GIB67_020458	30824	rna-gnl|WGS:JACGCM|KingUnif32726.1	GO:0004439(phosphatidylinositol-4,5-bisphosphate 5-phosphatase activity);GO:0004445(inositol-polyphosphate 5-phosphatase activity);GO:0005737(cytoplasm);GO:0034485(phosphatidylinositol-3,4,5-trisphosphate 5-phosphatase activity);GO:0046856(phosphatidylinositol dephosphorylation)	00562(Inositol phosphate metabolism);04070(Phosphatidylinositol signaling system)	K20279	EC:3.1.3.36	Type IV inositol polyphosphate 5-phosphatase [Actinidia chinensis var. chinensis]	NA	3.38402	19.9524	11.0025	0.783138	0.492374	0.234334	0.193504	0.88644	0.344999	7.69993e-11	7.34789e-09	yes
gene-GIB67_030457	GIB67_030457	1921	rna-gnl|WGS:JACGCM|KingUnif27301.1	GO:0005737(cytoplasm);GO:0016740(transferase activity);GO:0016747(transferase activity, transferring acyl groups other than amino-acyl groups)	00073(Cutin, suberine and wax biosynthesis)	K15400	EC:2.3.1.188	PREDICTED: omega-hydroxypalmitate O-feruloyl transferase [Nelumbo nucifera]	NA	0	0	0	0.260553	0.168333	0.128273	1.7763	0.767963	4.66859	7.80625e-11	7.38751e-09	yes
gene-GIB67_008217	GIB67_008217	14841	rna-gnl|WGS:JACGCM|KingUnif39696.1	GO:0009699(phenylpropanoid biosynthetic process);GO:0042349(guiding stereospecific synthesis activity)	NA	NA	NA	hypothetical protein CUMW_042680 [Citrus unshiu]	NA	0.073379	0.042163	0	0.285938	0.212598	0.602632	5.35869	4.05568	6.01785	7.8112e-11	7.38751e-09	yes
gene-GIB67_005579	GIB67_005579	37719	rna-gnl|WGS:JACGCM|KingUnif21490.1	GO:0019745(pentacyclic triterpenoid biosynthetic process);GO:0042299(lupeol synthase activity)	00909(Sesquiterpenoid and triterpenoid biosynthesis)	K20659	EC:5.4.99.41	beta-amyrin synthase [Nigella sativa]	NA	0	0	0	0.292677	0	0	14.2558	17.459	3.94922	8.2553e-11	7.76248e-09	yes
gene-GIB67_037448	GIB67_037448	10242	rna-gnl|WGS:JACGCM|KingUnif13444.1	GO:0000981(RNA polymerase II transcription factor activity, sequence-specific DNA binding);GO:0001135(transcription factor activity, RNA polymerase II transcription factor recruiting);GO:0003677(DNA binding);GO:0003700(DNA binding transcription factor activity);GO:0005634(nucleus);GO:0006351(transcription, DNA-templated);GO:0006355(regulation of transcription, DNA-templated);GO:0006357(regulation…	NA	NA	NA	PREDICTED: transcription factor RAX2-like [Nelumbo nucifera]	NA	0	0.200113	0.28175	4.7426	29.6771	40.1552	6.43591	9.18219	7.01059	8.28095e-11	7.76248e-09	yes
gene-GIB67_015610	GIB67_015610	6313	rna-gnl|WGS:JACGCM|KingUnif37868.1	GO:0005886(plasma membrane);GO:0031225(anchored component of membrane)	NA	NA	NA	FAS1 domain [Macleaya cordata]	NA	3.78773	0.691881	0.873583	6.00232	19.3339	32.3753	279.727	24.2023	122.118	8.69712e-11	8.11668e-09	yes
gene-GIB67_006687	GIB67_006687	37466	rna-gnl|WGS:JACGCM|KingUnif40756.1	NA	NA	NA	NA		NA	0.452533	0	0.074484	0.16212	0.183445	0	13.4791	13.9129	12.1224	9.20389e-11	8.55194e-09	yes
gene-GIB67_000406	GIB67_000406	20285	rna-gnl|WGS:JACGCM|KingUnif16316.1	GO:0004497(monooxygenase activity);GO:0007275(multicellular organism development);GO:0010268(brassinosteroid homeostasis);GO:0016125(sterol metabolic process);GO:0016132(brassinosteroid biosynthetic process)	NA	NA	NA	PREDICTED: cytochrome P450 716B1 [Vitis vinifera]	NA	1.82789	0.168882	0.333542	31.504	31.0972	246.034	302.432	126.516	146.844	9.38131e-11	8.67874e-09	yes
gene-GIB67_026295	GIB67_026295	37818	rna-gnl|WGS:JACGCM|KingUnif28190.1	GO:0007165(signal transduction);GO:0016020(membrane)	NA	NA	NA	uncharacterized protein LOC111409212 isoform X1 [Olea europaea var. sylvestris]	NA	0	0	0	0.297991	0.562408	0.322943	2.16641	4.00523	4.44238	9.57821e-11	8.82236e-09	yes
gene-GIB67_040295	GIB67_040295	18663	rna-gnl|WGS:JACGCM|KingUnif16141.1	GO:0003677(DNA binding);GO:0003700(DNA binding transcription factor activity);GO:0005634(nucleus);GO:0006351(transcription, DNA-templated);GO:0006355(regulation of transcription, DNA-templated)	04933(AGE-RAGE signaling pathway in diabetic complications)	K06236	NA	SANT/Myb domain [Macleaya cordata]	NA	8.97433	37.9244	31.4927	0.171671	0.85792	0.251206	1.1228	6.22555	1.27811	9.77422e-11	8.96393e-09	yes
gene-GIB67_041786	GIB67_041786	39170	rna-gnl|WGS:JACGCM|KingUnif08564.1	GO:0008202(steroid metabolic process);GO:0009507(chloroplast);GO:0009737(response to abscisic acid);GO:0009741(response to brassinosteroid);GO:0016491(oxidoreductase activity);GO:0070524(11-beta-hydroxysteroid dehydrogenase (NADP+) activity);GO:0072555(17-beta-ketosteroid reductase activity);GO:0072582(17-beta-hydroxysteroid dehydrogenase (NADP+) activity)	NA	NA	NA	hypothetical protein AQUCO_01100092v1 [Aquilegia coerulea]	NA	0	0	0	1.574	0.126413	21.5949	0	0.061238	0.09315	9.8256e-11	8.97221e-09	yes
gene-GIB67_030061	GIB67_030061	17508	rna-gnl|WGS:JACGCM|KingUnif02518.1	GO:0005783(endoplasmic reticulum);GO:0016020(membrane);GO:0016788(hydrolase activity, acting on ester bonds)	NA	NA	NA	hypothetical protein AQUCO_00700867v1 [Aquilegia coerulea]	NA	1.13425	1.24763	1.00073	7.75709	12.2088	26.5066	29.8025	19.5904	26.0896	1.0024e-10	9.11412e-09	yes
gene-GIB67_005911	GIB67_005911	24849	rna-gnl|WGS:JACGCM|KingUnif04184.1	GO:0005516(calmodulin binding);GO:0005634(nucleus)	03015(mRNA surveillance pathway)	K14411	NA	PREDICTED: protein IQ-DOMAIN 1-like [Nelumbo nucifera]	NA	0.204853	0.036009	0.084912	12.037	0.208017	26.6893	0.269196	0.113359	0.243896	1.07926e-10	9.74037e-09	yes
gene-GIB67_018423	GIB67_018423	34425	rna-gnl|WGS:JACGCM|KingUnif11724.1	GO:0019745(pentacyclic triterpenoid biosynthetic process);GO:0042299(lupeol synthase activity)	00909(Sesquiterpenoid and triterpenoid biosynthesis)	K20659	EC:5.4.99.41	beta-amyrin synthase [Nigella sativa]	NA	0	0	0	0	0	0	9.15645	12.0691	1.57218	1.08048e-10	9.74037e-09	yes
gene-GIB67_000987	GIB67_000987	23386	rna-gnl|WGS:JACGCM|KingUnif14337.1	GO:0005737(cytoplasm);GO:0005886(plasma membrane);GO:0005887(integral component of plasma membrane);GO:0006857(oligopeptide transport);GO:0015031(protein transport);GO:0016020(membrane);GO:0035673(oligopeptide transmembrane transporter activity)	NA	NA	NA	Oligopeptide transporter [Macleaya cordata]	NA	23.9122	321.747	126.813	17.2963	6.68778	15.4757	2.23049	5.61832	1.78002	1.10071e-10	9.88075e-09	yes
gene-GIB67_007824	GIB67_007824	16230	rna-gnl|WGS:JACGCM|KingUnif32902.1	GO:0003700(DNA binding transcription factor activity);GO:0005634(nucleus);GO:0043565(sequence-specific DNA binding);GO:0044212(transcription regulatory region DNA binding)	00960(Tropane, piperidine and pyridine alkaloid biosynthesis)	K08081	EC:1.1.1.206	zinc finger protein [Macleaya cordata]	NA	0	0	0	0.217503	1.52424	3.49232	9.15528	4.92913	6.11601	1.1166e-10	9.9811e-09	yes
gene-GIB67_006756	GIB67_006756	29457	rna-gnl|WGS:JACGCM|KingUnif00918.1	GO:0016787(hydrolase activity)	03010(Ribosome)	K02952	NA	hypothetical protein BVC80_1707g104 [Macleaya cordata]	NA	9.57719	3.00128	4.86468	14.7544	35.9411	32.0672	203.429	96.7508	67.8773	1.18654e-10	1.05617e-08	yes
gene-GIB67_011835	GIB67_011835	5304	rna-gnl|WGS:JACGCM|KingUnif23704.1	GO:0005634(nucleus)	NA	NA	NA	protein FANTASTIC FOUR 1 [Herrania umbratica]	NA	31.768	73.2897	57.1622	0.388839	1.37951	2.18623	3.74898	11.3747	1.32688	1.21278e-10	1.07501e-08	yes
gene-GIB67_040109	GIB67_040109	18476	rna-gnl|WGS:JACGCM|KingUnif17144.1	GO:0003674(molecular_function);GO:0005634(nucleus);GO:0008150(biological_process);GO:0016021(integral component of membrane)	NA	NA	NA	PREDICTED: uncharacterized protein LOC104597425 [Nelumbo nucifera]	NA	0	0	0	0.881126	1.97593	2.56744	14.3695	3.68068	0.80042	1.23581e-10	1.09086e-08	yes
gene-GIB67_023289	GIB67_023289	3683	rna-gnl|WGS:JACGCM|KingUnif38145.1	GO:0000287(magnesium ion binding);GO:0008152(metabolic process);GO:0009507(chloroplast);GO:0010333(terpene synthase activity);GO:0016114(terpenoid biosynthetic process);GO:0034007(S-linalool synthase activity);GO:0043693(monoterpene biosynthetic process)	00902(Monoterpenoid biosynthesis)	K15086	EC:4.2.3.25	(3S,6E)-nerolidol synthase 1, chloroplastic [Vitis vinifera]	NA	0.709771	3.60976	65.7156	0.097474	0.075644	0.381254	0	0.175129	0.0393	1.25866e-10	1.10642e-08	yes
gene-GIB67_019713	GIB67_019713	21750	rna-gnl|WGS:JACGCM|KingUnif19343.1	GO:0000302(response to reactive oxygen species);GO:0003677(DNA binding);GO:0003700(DNA binding transcription factor activity);GO:0005634(nucleus);GO:0006351(transcription, DNA-templated);GO:0006355(regulation of transcription, DNA-templated);GO:0009723(response to ethylene);GO:0009873(ethylene-activated signaling pathway);GO:0035865(cellular response to potassium ion);GO:0043565(sequence-specific…	NA	NA	NA	hypothetical protein AQUCO_00400669v1 [Aquilegia coerulea]	NA	0	0.120541	0	1.13002	0.743282	0.59413	10.0263	14.1971	3.69684	1.27988e-10	1.12042e-08	yes
gene-GIB67_010820	GIB67_010820	38205	rna-gnl|WGS:JACGCM|KingUnif39222.1	GO:0003674(molecular_function);GO:0005739(mitochondrion);GO:0008150(biological_process)	NA	NA	NA	hypothetical protein AQUCO_01500105v1 [Aquilegia coerulea]	NA	0	0	0	0.238905	0.536164	0.752314	2.58824	4.9539	5.57974	1.31403e-10	1.14559e-08	yes
gene-GIB67_012696	GIB67_012696	11251	rna-gnl|WGS:JACGCM|KingUnif17501.1	GO:0005507(copper ion binding);GO:0009809(lignin biosynthetic process);GO:0016722(oxidoreductase activity, oxidizing metal ions)	NA	NA	NA	hypothetical protein AQUCO_00400287v1 [Aquilegia coerulea]	NA	0	0.034656	0	0.111093	0.746042	1.94833	5.22191	8.37987	3.62029	1.33034e-10	1.15505e-08	yes
gene-GIB67_001914	GIB67_001914	5956	rna-gnl|WGS:JACGCM|KingUnif11221.1	GO:0005618(cell wall);GO:0009506(plasmodesma);GO:0010497(plasmodesmata-mediated intercellular transport);GO:0033609(oxalate metabolic process);GO:0046564(oxalate decarboxylase activity);GO:2000280(regulation of root development)	NA	NA	NA	germin-like protein subfamily 2 member 4 [Manihot esculenta]	NA	13.3947	2.06838	2.91721	21.5549	100.136	131.542	403.979	249.784	771.172	1.33952e-10	1.15828e-08	yes
gene-GIB67_030648	GIB67_030648	10187	rna-gnl|WGS:JACGCM|KingUnif28237.1	GO:0003677(DNA binding);GO:0003700(DNA binding transcription factor activity);GO:0005515(protein binding);GO:0005634(nucleus);GO:0006351(transcription, DNA-templated);GO:0006355(regulation of transcription, DNA-templated);GO:0009266(response to temperature stimulus);GO:0009740(gibberellic acid mediated signaling pathway);GO:0009908(flower development);GO:0010452(histone H3-K36 methylation);GO:004…	04933(AGE-RAGE signaling pathway in diabetic complications)	K06236	NA	SANT/Myb domain [Macleaya cordata]	NA	15.3871	39.0138	54.6145	0.697363	2.30041	2.17598	2.59643	7.55299	2.11642	1.39673e-10	1.20283e-08	yes
gene-GIB67_010692	GIB67_010692	38077	rna-gnl|WGS:JACGCM|KingUnif29454.1	GO:0005886(plasma membrane);GO:0016301(kinase activity);GO:0016310(phosphorylation)	NA	NA	NA	hypothetical protein AQUCO_02600018v1 [Aquilegia coerulea]	NA	0	0	0	2.75575	0.070652	2.83407	0	0	0	1.44836e-10	1.23909e-08	yes
gene-GIB67_022671	GIB67_022671	1514	rna-gnl|WGS:JACGCM|KingUnif16215.1	GO:0004497(monooxygenase activity);GO:0007275(multicellular organism development);GO:0010268(brassinosteroid homeostasis);GO:0016125(sterol metabolic process);GO:0016132(brassinosteroid biosynthetic process)	NA	NA	NA	hypothetical protein AQUCO_04500214v1 [Aquilegia coerulea]	NA	0.535361	0.670789	0.562908	0.535625	1.08956	1.28002	10.6525	11.5576	5.78826	1.45053e-10	1.23909e-08	yes
gene-GIB67_021371	GIB67_021371	24455	rna-gnl|WGS:JACGCM|KingUnif27627.1	GO:0003729(mRNA binding);GO:0016301(kinase activity);GO:0016310(phosphorylation);GO:0046872(metal ion binding)	NA	NA	NA	zinc finger protein [Macleaya cordata]	NA	2.22442	18.6921	10.651	0	0	0	0.395399	1.85046	0.343266	1.47735e-10	1.25694e-08	yes
gene-GIB67_008504	GIB67_008504	35822	rna-gnl|WGS:JACGCM|KingUnif16477.1	GO:0006457(protein folding);GO:0009507(chloroplast)	NA	NA	NA	DnaJ domain [Macleaya cordata]	NA	2.20968	2.00066	0.413869	2.93569	6.32381	14.0604	52.0012	111.886	30.5989	1.57676e-10	1.33614e-08	yes
gene-GIB67_008463	GIB67_008463	15079	rna-gnl|WGS:JACGCM|KingUnif25156.1	GO:0004650(polygalacturonase activity);GO:0005576(extracellular region);GO:0005975(carbohydrate metabolic process)	00040(Pentose and glucuronate interconversions)	K01184	EC:3.2.1.15	Polygalacturonase [Actinidia chinensis var. chinensis]	NA	0	0	0	0.479327	0.895348	17.5433	0.058459	0.145665	0	1.69441e-10	1.42903e-08	yes
gene-GIB67_001037	GIB67_001037	23446	rna-gnl|WGS:JACGCM|KingUnif28935.1	GO:0004503(monophenol monooxygenase activity);GO:0036263(L-DOPA monooxygenase activity)	00350(Tyrosine metabolism);00950(Isoquinoline alkaloid biosynthesis)	K00422	EC:1.10.3.1	Tyrosinase [Macleaya cordata]	NA	0.093554	0	0	10.7819	0.317259	37.5976	0.093749	0	0.049707	1.69986e-10	1.42903e-08	yes
gene-GIB67_025633	GIB67_025633	38243	rna-gnl|WGS:JACGCM|KingUnif37739.1	GO:0005737(cytoplasm);GO:0030001(metal ion transport);GO:0046914(transition metal ion binding);GO:0046916(cellular transition metal ion homeostasis)	NA	NA	NA	copper transport protein ATX1-like [Hevea brasiliensis]	NA	57.6525	38.7624	61.5059	37.1207	49.7009	124.433	721.099	514.359	971.118	1.80447e-10	1.51097e-08	yes
gene-GIB67_041173	GIB67_041173	34196	rna-gnl|WGS:JACGCM|KingUnif31786.1	GO:0005737(cytoplasm);GO:0009733(response to auxin);GO:0016874(ligase activity)	04075(Plant hormone signal transduction)	K14487	NA	GH3 auxin-responsive promoter [Cinnamomum micranthum f. kanehirae]	NA	0.349971	0.095727	0.170374	16.3113	85.721	7.58902	37.676	4.01718	66.5112	1.8388e-10	1.53366e-08	yes
gene-GIB67_006224	GIB67_006224	2525	rna-gnl|WGS:JACGCM|KingUnif19135.1	GO:0009813(flavonoid biosynthetic process);GO:0043231(intracellular membrane-bounded organelle);GO:0052696(flavonoid glucuronidation);GO:0080043(quercetin 3-O-glucosyltransferase activity);GO:0080044(quercetin 7-O-glucosyltransferase activity)	NA	NA	NA	hypothetical protein AQUCO_01500237v1 [Aquilegia coerulea]	NA	0.459845	0.119307	0.180026	5.56045	10.0999	12.3608	11.0337	9.76328	3.51385	1.92884e-10	1.60245e-08	yes
gene-GIB67_010809	GIB67_010809	38189	rna-gnl|WGS:JACGCM|KingUnif41147.1	GO:0005634(nucleus);GO:0016301(kinase activity);GO:0016310(phosphorylation)	NA	NA	NA	hypothetical protein CCACVL1_26352 [Corchorus capsularis]	NA	0	0	0.33449	143.909	2.66965	22.3305	0	0.568938	0.440809	1.97787e-10	1.63677e-08	yes
gene-GIB67_036579	GIB67_036579	23939	rna-gnl|WGS:JACGCM|KingUnif22720.1	GO:0003680(AT DNA binding);GO:0003700(DNA binding transcription factor activity);GO:0005634(nucleus);GO:0006351(transcription, DNA-templated);GO:0006355(regulation of transcription, DNA-templated);GO:0042742(defense response to bacterium);GO:0045087(innate immune response);GO:0045824(negative regulation of innate immune response);GO:1900425(negative regulation of defense response to bacterium)	NA	NA	NA	AT-hook motif nuclear-localized protein 20, partial [Ricinus communis]	NA	1.20874	1.48956	0.169925	3.36215	7.06674	11.8893	42.3312	54.7023	22.8466	1.99369e-10	1.64343e-08	yes
gene-GIB67_025038	GIB67_025038	13878	rna-gnl|WGS:JACGCM|KingUnif06024.1	GO:0003700(DNA binding transcription factor activity);GO:0005634(nucleus);GO:0006351(transcription, DNA-templated);GO:0006355(regulation of transcription, DNA-templated);GO:0007275(multicellular organism development);GO:0009753(response to jasmonic acid);GO:0044212(transcription regulatory region DNA binding);GO:0045995(regulation of embryonic development);GO:0048317(seed morphogenesis);GO:008006…	NA	NA	NA	PREDICTED: NAC transcription factor 25 [Vitis vinifera]	NA	2.71027	151.57	106.936	2.09887	0.60954	1.82	5.11518	0.861508	1.07101	2.09447e-10	1.71982e-08	yes
gene-GIB67_004288	GIB67_004288	19674	rna-gnl|WGS:JACGCM|KingUnif23019.1	GO:0001558(regulation of cell growth);GO:0003677(DNA binding);GO:0003700(DNA binding transcription factor activity);GO:0005515(protein binding);GO:0005634(nucleus);GO:0005739(mitochondrion);GO:0006351(transcription, DNA-templated);GO:0006355(regulation of transcription, DNA-templated);GO:0009637(response to blue light);GO:0009651(response to salt stress);GO:0009965(leaf morphogenesis);GO:0017148(…	NA	NA	NA	homeobox-leucine zipper protein HAT5 [Jatropha curcas]	NA	105.573	187.037	103.392	5.16771	3.21356	14.1699	17.2809	33.6026	13.8935	2.17341e-10	1.77775e-08	yes
gene-GIB67_019647	GIB67_019647	16651	rna-gnl|WGS:JACGCM|KingUnif27789.1	GO:0004144(diacylglycerol O-acyltransferase activity);GO:0005886(plasma membrane);GO:0019432(triglyceride biosynthetic process);GO:0047196(long-chain-alcohol O-fatty-acyltransferase activity)	NA	NA	NA	O-acyltransferase WSD1-like [Papaver somniferum]	NA	0.046597	0	0	2.73544	0.040389	12.527	0	0	0	2.59358e-10	2.11327e-08	yes
gene-GIB67_001394	GIB67_001394	14118	rna-gnl|WGS:JACGCM|KingUnif36571.1	GO:0004601(peroxidase activity);GO:0005576(extracellular region);GO:0006979(response to oxidative stress);GO:0009809(lignin biosynthetic process);GO:0020037(heme binding);GO:0042744(hydrogen peroxide catabolic process);GO:0046872(metal ion binding);GO:0055114(oxidation-reduction process)	00940(Phenylpropanoid biosynthesis)	K00430	EC:1.11.1.7	PREDICTED: peroxidase 72-like [Nelumbo nucifera]	NA	0.404	0.144561	0.374008	3.2759	21.3544	17.6667	13.6032	47.3132	10.3503	2.63418e-10	2.13813e-08	yes
gene-GIB67_039985	GIB67_039985	34893	rna-gnl|WGS:JACGCM|KingUnif18921.1	GO:0003746(translation elongation factor activity);GO:0005739(mitochondrion);GO:0006414(translational elongation);GO:0016021(integral component of membrane)	NA	NA	NA	PREDICTED: uncharacterized protein LOC104594367 [Nelumbo nucifera]	NA	0	0	0	15.6891	0.227867	43.9173	4.2428	0.271093	0.652749	2.68193e-10	2.16858e-08	yes
gene-GIB67_031460	GIB67_031460	25131	rna-gnl|WGS:JACGCM|KingUnif35568.1	GO:0046658(anchored component of plasma membrane)	NA	NA	NA	PREDICTED: blue copper protein-like [Juglans regia]	NA	0	0	0	0.305127	0.087868	2.33294	5.63219	4.22849	22.0575	2.80194e-10	2.257e-08	yes
gene-GIB67_025398	GIB67_025398	12773	rna-gnl|WGS:JACGCM|KingUnif21230.1	GO:0003674(molecular_function);GO:0005575(cellular_component);GO:0008150(biological_process)	NA	NA	NA	PREDICTED: uncharacterized protein At1g15400 [Nelumbo nucifera]	NA	0	0	0	0.800185	1.17331	1.0089	7.86351	18.5861	1.41828	2.91073e-10	2.33575e-08	yes
gene-GIB67_013964	GIB67_013964	36582	rna-gnl|WGS:JACGCM|KingUnif06129.1	GO:0005576(extracellular region)	00073(Cutin, suberine and wax biosynthesis)	K15402	EC:1.14.-.-	hypothetical protein C5167_005073 [Papaver somniferum]	NA	0.020925	0	0	5.91475	0.032491	6.55812	0.035085	0	0.018692	2.92643e-10	2.33949e-08	yes
gene-GIB67_010513	GIB67_010513	25333	rna-gnl|WGS:JACGCM|KingUnif30216.1	GO:0005215(transporter activity);GO:0016021(integral component of membrane);GO:0055085(transmembrane transport)	03040(Spliceosome)	K12818	EC:3.6.4.13	PREDICTED: probable peptide/nitrate transporter At3g43790 isoform X1 [Theobroma cacao]	NA	32.7564	27.1216	42.7667	2.74079	2.08482	1.73269	2.78769	11.4551	6.06422	3.18576e-10	2.53723e-08	yes
gene-GIB67_020922	GIB67_020922	26453	rna-gnl|WGS:JACGCM|KingUnif18184.1	GO:0005509(calcium ion binding);GO:0005811(lipid droplet);GO:0009507(chloroplast);GO:0009737(response to abscisic acid);GO:0009819(drought recovery);GO:0046872(metal ion binding);GO:0055114(oxidation-reduction process);GO:1990137(plant seed peroxidase activity)	00073(Cutin, suberine and wax biosynthesis)	K17991	EC:1.11.2.3	Caleosin [Macleaya cordata]	NA	38.2475	105.637	156.798	12.7827	6.07613	8.86752	13.9559	17.7174	13.5051	3.21161e-10	2.54824e-08	yes
gene-GIB67_032723	GIB67_032723	18049	rna-gnl|WGS:JACGCM|KingUnif00936.1	GO:0005524(ATP binding);GO:0005739(mitochondrion);GO:0006952(defense response);GO:0043531(ADP binding)	04626(Plant-pathogen interaction)	K13459	NA	putative disease resistance protein [Cinnamomum micranthum f. kanehirae]	NA	3.29812	8.51193	4.67837	0.180542	0.105283	0.290115	0.635836	1.46142	0.355146	3.23744e-10	2.55915e-08	yes
gene-GIB67_002818	GIB67_002818	27113	rna-gnl|WGS:JACGCM|KingUnif12170.1	GO:0002213(defense response to insect);GO:0003824(catalytic activity);GO:0004806(triglyceride lipase activity);GO:0005576(extracellular region);GO:0016042(lipid catabolic process);GO:0016298(lipase activity)	00100(Steroid biosynthesis)	K01052	EC:3.1.1.13	triacylglycerol lipase 2-like [Papaver somniferum]	NA	8.51185	47.1448	9.47925	0.066689	0.150121	0.03905	0.997764	8.89336	0.374783	3.3518e-10	2.6397e-08	yes
gene-GIB67_008574	GIB67_008574	15391	rna-gnl|WGS:JACGCM|KingUnif28113.1	GO:0005634(nucleus);GO:0005773(vacuole);GO:0006950(response to stress);GO:0016787(hydrolase activity)	NA	NA	NA	universal stress protein PHOS32-like [Durio zibethinus]	NA	0.370773	0.81278	0.702993	4.05401	7.91588	8.82068	5.95338	18.8174	165.255	3.40998e-10	2.67557e-08	yes
gene-GIB67_015920	GIB67_015920	88	rna-gnl|WGS:JACGCM|KingUnif12305.1	GO:0051213(dioxygenase activity)	00460(Cyanoamino acid metabolism)	K20802	EC:4.1.2.10	hypothetical protein AQUCO_01000320v1 [Aquilegia coerulea]	NA	0	0	0	0.103104	1.02241	0.413052	1.37499	41.2065	0.798385	3.46715e-10	2.71039e-08	yes
gene-GIB67_032673	GIB67_032673	17999	rna-gnl|WGS:JACGCM|KingUnif15147.1	GO:0004674(protein serine/threonine kinase activity);GO:0005886(plasma membrane);GO:0006468(protein phosphorylation);GO:0009506(plasmodesma);GO:0031625(ubiquitin protein ligase binding);GO:0045087(innate immune response)	NA	NA	NA	Protein kinase domain [Macleaya cordata]	NA	0.656787	0.188657	0.216409	3.31486	6.26743	11.156	16.746	9.7095	8.06305	3.81014e-10	2.96757e-08	yes
gene-GIB67_040521	GIB67_040521	39403	rna-gnl|WGS:JACGCM|KingUnif34825.1	GO:0046658(anchored component of plasma membrane)	00230(Purine metabolism);00240(Pyrimidine metabolism);03020(RNA polymerase)	K03006	EC:2.7.7.6	PREDICTED: early nodulin-like protein 2 [Beta vulgaris subsp. vulgaris]	NA	205.653	429.608	820.017	494.255	818.419	439.508	12.1138	18.3108	14.1706	4.40998e-10	3.42218e-08	yes
gene-GIB67_043011	GIB67_043011	6859	rna-gnl|WGS:JACGCM|KingUnif02655.1	GO:0004601(peroxidase activity);GO:0005576(extracellular region);GO:0005773(vacuole);GO:0005829(cytosol);GO:0006979(response to oxidative stress);GO:0009505(plant-type cell wall);GO:0009809(lignin biosynthetic process);GO:0010228(vegetative to reproductive phase transition of meristem);GO:0020037(heme binding);GO:0042744(hydrogen peroxide catabolic process);GO:0046872(metal ion binding);GO:005511…	00940(Phenylpropanoid biosynthesis)	K00430	EC:1.11.1.7	PREDICTED: peroxidase 17-like [Nelumbo nucifera]	NA	113.451	206.228	178.039	6.46209	6.20653	14.8336	10.1732	49.836	11.2581	4.93431e-10	3.81509e-08	yes
gene-GIB67_039973	GIB67_039973	3341	rna-gnl|WGS:JACGCM|KingUnif04459.1	GO:0003677(DNA binding);GO:0003700(DNA binding transcription factor activity);GO:0005515(protein binding);GO:0005634(nucleus);GO:0006351(transcription, DNA-templated);GO:0006355(regulation of transcription, DNA-templated)	04933(AGE-RAGE signaling pathway in diabetic complications)	K06236	NA	PREDICTED: uncharacterized protein LOC104880828 [Vitis vinifera]	NA	0	0	0.050085	0.47091	0.810656	0.885442	3.96797	5.36333	2.04749	5.14539e-10	3.96382e-08	yes
gene-GIB67_022889	GIB67_022889	17976	rna-gnl|WGS:JACGCM|KingUnif25295.1	NA	00230(Purine metabolism);00240(Pyrimidine metabolism);03020(RNA polymerase)	K03010	EC:2.7.7.6	uncharacterized protein LOC103703873 [Phoenix dactylifera]	NA	18.8393	70.646	65.3843	0.815158	2.19582	2.92426	7.62864	11.1389	2.47189	5.20748e-10	3.99712e-08	yes
gene-GIB67_023358	GIB67_023358	34832	rna-gnl|WGS:JACGCM|KingUnif01130.1	GO:0003674(molecular_function);GO:0005783(endoplasmic reticulum);GO:0016021(integral component of membrane);GO:0034599(cellular response to oxidative stress);GO:0071470(cellular response to osmotic stress)	NA	NA	NA	uncharacterized protein LOC103718046 [Phoenix dactylifera]	NA	47.1298	2.96971	53.3088	3.93243	0.856315	2.50129	0.775157	0.808675	0.511508	5.23504e-10	4.00376e-08	yes
gene-GIB67_033748	GIB67_033748	3001	rna-gnl|WGS:JACGCM|KingUnif16828.1	GO:0004683(calmodulin-dependent protein kinase activity);GO:0005516(calmodulin binding);GO:0005634(nucleus);GO:0005737(cytoplasm);GO:0009738(abscisic acid-activated signaling pathway);GO:0009931(calcium-dependent protein serine/threonine kinase activity);GO:0018105(peptidyl-serine phosphorylation);GO:0035556(intracellular signal transduction);GO:0046777(protein autophosphorylation)	04626(Plant-pathogen interaction)	K13412	EC:2.7.11.1	hypothetical protein AQUCO_11100023v1 [Aquilegia coerulea]	NA	10.6023	25.985	17.3425	0.126411	0.790404	0.744376	0.603326	3.53629	1.2605	5.31766e-10	4.05232e-08	yes
gene-GIB67_031497	GIB67_031497	20800	rna-gnl|WGS:JACGCM|KingUnif14932.1	GO:0004497(monooxygenase activity);GO:0007275(multicellular organism development);GO:0010268(brassinosteroid homeostasis);GO:0016125(sterol metabolic process);GO:0016132(brassinosteroid biosynthetic process)	NA	NA	NA	PREDICTED: beta-amyrin 28-oxidase-like [Nelumbo nucifera]	NA	0.531078	2.37578	2.01379	4.05165	6.58624	23.3482	46.7133	40.4501	55.886	5.59633e-10	4.2494e-08	yes
gene-GIB67_041847	GIB67_041847	39235	rna-gnl|WGS:JACGCM|KingUnif24291.1	GO:0004386(helicase activity);GO:0005634(nucleus);GO:0008150(biological_process)	NA	NA	NA	uncharacterized protein LOC113863724 isoform X1 [Abrus precatorius]	NA	0	0	0	17.0894	0.939135	10.8524	5.45095	1.49807	2.64091	5.65619e-10	4.27952e-08	yes
gene-GIB67_039655	GIB67_039655	24266	rna-gnl|WGS:JACGCM|KingUnif07510.1	GO:0004198(calcium-dependent cysteine-type endopeptidase activity);GO:0005737(cytoplasm);GO:0006508(proteolysis)	04626(Plant-pathogen interaction)	K13448	NA	PREDICTED: probable calcium-binding protein CML49 [Gossypium raimondii]	NA	1392.11	4463.61	3474.88	4.05205	44.3681	14.9927	52.1996	221.58	45.1697	5.71908e-10	4.31169e-08	yes
gene-GIB67_026739	GIB67_026739	22826	rna-gnl|WGS:JACGCM|KingUnif32495.1	GO:0005345(purine nucleobase transmembrane transporter activity);GO:0006863(purine nucleobase transport);GO:0009507(chloroplast);GO:0016020(membrane);GO:0016021(integral component of membrane)	00010(Glycolysis / Gluconeogenesis);00030(Pentose phosphate pathway);00051(Fructose and mannose metabolism);00052(Galactose metabolism);03018(RNA degradation)	K00850	EC:2.7.1.11	hypothetical protein AQUCO_01000091v1 [Aquilegia coerulea]	NA	0	0	0	0.375574	0.529437	4.87385	16.0296	4.73648	1.08365	6.00086e-10	4.50809e-08	yes
gene-GIB67_027587	GIB67_027587	9289	rna-gnl|WGS:JACGCM|KingUnif25496.1	GO:0003677(DNA binding);GO:0003700(DNA binding transcription factor activity);GO:0005634(nucleus);GO:0006351(transcription, DNA-templated);GO:0006355(regulation of transcription, DNA-templated);GO:0007389(pattern specification process);GO:0010076(maintenance of floral meristem identity);GO:0010077(maintenance of inflorescence meristem identity);GO:0010223(secondary shoot formation);GO:0010228(veg…	NA	NA	NA	PREDICTED: BEL1-like homeodomain protein 9 [Vitis vinifera]	NA	0.206792	0.196464	0.176533	2.28664	2.38864	5.27839	8.69052	3.25014	6.40453	6.13525e-10	4.59276e-08	yes
gene-GIB67_041136	GIB67_041136	34147	rna-gnl|WGS:JACGCM|KingUnif28192.1	GO:0005516(calmodulin binding);GO:0005576(extracellular region);GO:0005886(plasma membrane);GO:0006869(lipid transport);GO:0008289(lipid binding);GO:0009505(plant-type cell wall);GO:0009534(chloroplast thylakoid);GO:0048046(apoplast);GO:0071555(cell wall organization)	NA	NA	NA	plant lipid transfer protein/Par allergen [Artemisia annua]	NA	4.33079	0	0.470506	2718.43	4.21863	2647.89	5.86612	3.7649	7.80986	6.24718e-10	4.66009e-08	yes
gene-GIB67_004458	GIB67_004458	19849	rna-gnl|WGS:JACGCM|KingUnif25727.1	GO:0000981(RNA polymerase II transcription factor activity, sequence-specific DNA binding);GO:0001135(transcription factor activity, RNA polymerase II transcription factor recruiting);GO:0003677(DNA binding);GO:0003700(DNA binding transcription factor activity);GO:0005515(protein binding);GO:0005524(ATP binding);GO:0005634(nucleus);GO:0006351(transcription, DNA-templated);GO:0006355(regulation of…	NA	NA	NA	PREDICTED: transcription factor TT2 [Eucalyptus grandis]	NA	1.40421	7.4774	0.597877	9.48357	15.6756	49.5783	223.995	142.03	99.8418	6.63637e-10	4.93304e-08	yes
gene-GIB67_005293	GIB67_005293	36806	rna-gnl|WGS:JACGCM|KingUnif31025.1	GO:0009733(response to auxin);GO:0010223(secondary shoot formation);GO:0016121(carotene catabolic process);GO:0016702(oxidoreductase activity, acting on single donors with incorporation of molecular oxygen, incorporation of two atoms of oxygen);GO:0045549(9-cis-epoxycarotenoid dioxygenase activity);GO:1901601(strigolactone biosynthetic process)	00906(Carotenoid biosynthesis)	K17912	EC:1.13.11.68	hypothetical protein AQUCO_03700073v1 [Aquilegia coerulea]	NA	0	0.055737	0.027711	0.046705	0.108975	0.277971	2.38854	1.55465	5.38387	6.72441e-10	4.981e-08	yes
gene-GIB67_042139	GIB67_042139	8380	rna-gnl|WGS:JACGCM|KingUnif19569.1	GO:0005783(endoplasmic reticulum);GO:0010025(wax biosynthetic process);GO:0010143(cutin biosynthetic process);GO:0043668(exine);GO:0048653(anther development)	00073(Cutin, suberine and wax biosynthesis)	K15404	EC:4.1.99.5	Fatty acid hydroxylase [Macleaya cordata]	NA	0.069834	0.03017	0	19.3831	0.253786	43.7739	0.089269	0	0.465703	6.80956e-10	5.0265e-08	yes
gene-GIB67_000942	GIB67_000942	23340	rna-gnl|WGS:JACGCM|KingUnif18129.1	GO:0003006(developmental process involved in reproduction);GO:0005737(cytoplasm);GO:0005886(plasma membrane);GO:0006811(ion transport);GO:0006857(oligopeptide transport);GO:0009624(response to nematode);GO:0010039(response to iron ion);GO:0016021(integral component of membrane);GO:0048316(seed development);GO:0051980(iron-nicotianamine transmembrane transporter activity);GO:0055072(iron ion homeo…	NA	NA	NA	Oligopeptide transporter [Macleaya cordata]	NA	3.60308	134.225	32.7496	1.09913	4.96231	2.57928	1.99467	1.94331	1.5318	6.94069e-10	5.1055e-08	yes
gene-GIB67_004838	GIB67_004838	33002	rna-gnl|WGS:JACGCM|KingUnif18079.1	GO:0005829(cytosol);GO:0016618(hydroxypyruvate reductase activity);GO:0030267(glyoxylate reductase (NADP) activity)	00630(Glyoxylate and dicarboxylate metabolism);00260(Glycine, serine and threonine metabolism)	K15893	NA	D-isomer specific 2-hydroxyacid dehydrogenase [Macleaya cordata]	NA	0.243104	2.29919	5.6665	0	0	0	0	0	0.04062	7.52798e-10	5.51835e-08	yes
gene-GIB67_034648	GIB67_034648	4342	rna-gnl|WGS:JACGCM|KingUnif32805.1	NA	NA	NA	NA		NA	39.7625	20.7116	22.44	1.11974	0.730108	0.51275	5.36188	6.80584	1.36198	8.14367e-10	5.94909e-08	yes
gene-GIB67_010002	GIB67_010002	26075	rna-gnl|WGS:JACGCM|KingUnif12120.1	GO:0003824(catalytic activity);GO:0005575(cellular_component);GO:0009408(response to heat);GO:0009414(response to water deprivation);GO:0009737(response to abscisic acid);GO:0009809(lignin biosynthetic process);GO:0016621(cinnamoyl-CoA reductase activity);GO:0046686(response to cadmium ion);GO:0050662(coenzyme binding)	00940(Phenylpropanoid biosynthesis)	K09753	EC:1.2.1.44	PREDICTED: cinnamoyl-CoA reductase 2 [Vitis vinifera]	NA	0.174637	1.237	1.763	11.4939	0.601235	58.2664	0.104864	0.124715	0.219041	8.24632e-10	6.00338e-08	yes
gene-GIB67_021112	GIB67_021112	14258	rna-gnl|WGS:JACGCM|KingUnif37029.1	GO:0005622(intracellular);GO:0005634(nucleus);GO:0005737(cytoplasm);GO:0006606(protein import into nucleus);GO:0015031(protein transport)	00510(N-Glycan biosynthesis);04141(Protein processing in endoplasmic reticulum)	K12669	NA	hypothetical protein AQUCO_01200137v1 [Aquilegia coerulea]	NA	108.946	45.6122	42.0702	2.72279	2.74818	4.04838	8.5739	27.2514	14.8909	8.28108e-10	6.00804e-08	yes
gene-GIB67_041467	GIB67_041467	31986	rna-gnl|WGS:JACGCM|KingUnif12807.1	GO:0004674(protein serine/threonine kinase activity);GO:0005886(plasma membrane);GO:0006468(protein phosphorylation)	NA	NA	NA	probable receptor-like protein kinase At5g20050 [Ricinus communis]	NA	0.023993	0.079646	0.374381	2.17214	4.40102	28.9191	0.817389	0.386807	0.310138	8.31662e-10	6.01323e-08	yes
gene-GIB67_038126	GIB67_038126	28377	rna-gnl|WGS:JACGCM|KingUnif36254.1	GO:0003674(molecular_function);GO:0005634(nucleus);GO:0005886(plasma membrane);GO:0016021(integral component of membrane)	NA	NA	NA	PREDICTED: protein YLS9-like [Cucumis melo]	NA	6.47032	61.6831	131.424	44.2815	31.3075	64.3639	1.61938	1.24818	0.966212	8.8347e-10	6.36609e-08	yes
gene-GIB67_027905	GIB67_027905	35410	rna-gnl|WGS:JACGCM|KingUnif39275.1	GO:0003333(amino acid transmembrane transport);GO:0005886(plasma membrane);GO:0015171(amino acid transmembrane transporter activity)	NA	NA	NA	PREDICTED: amino acid permease 4-like [Nelumbo nucifera]	NA	47.4339	128.142	43.1152	4.2704	8.35259	5.56998	3.28412	11.8446	1.92765	8.98192e-10	6.45023e-08	yes
gene-GIB67_018177	GIB67_018177	8833	rna-gnl|WGS:JACGCM|KingUnif42474.1	NA	NA	NA	NA	Chaperonin-like RbcX [Macleaya cordata]	NA	25.1943	82.4995	303.91	16.3562	9.27451	23.0566	4.7858	5.08381	1.8336	1.00615e-09	7.20111e-08	yes
gene-GIB67_021444	GIB67_021444	7749	rna-gnl|WGS:JACGCM|KingUnif30525.1	GO:0005524(ATP binding);GO:0006952(defense response);GO:0016301(kinase activity);GO:0016310(phosphorylation)	NA	NA	NA	Protein kinase domain [Macleaya cordata]	NA	0.087049	0.258263	0.207425	0.1173	0.930881	0.317032	3.6164	19.6317	4.10052	1.01035e-09	7.20684e-08	yes
gene-GIB67_039345	GIB67_039345	29947	rna-gnl|WGS:JACGCM|KingUnif13628.1	GO:0004497(monooxygenase activity);GO:0007275(multicellular organism development);GO:0010268(brassinosteroid homeostasis);GO:0016125(sterol metabolic process);GO:0016132(brassinosteroid biosynthetic process)	NA	NA	NA	hypothetical protein AQUCO_04500214v1 [Aquilegia coerulea]	NA	0.143203	0	0	4.05124	3.58103	4.99998	5.67649	5.79249	15.0509	1.02387e-09	7.27603e-08	yes
gene-GIB67_019234	GIB67_019234	16895	rna-gnl|WGS:JACGCM|KingUnif40245.1	GO:0005634(nucleus)	NA	NA	NA	hypothetical protein AQUCO_01300440v1 [Aquilegia coerulea]	NA	0.101773	0.035391	0	19.5971	0.435327	9.22138	0.513278	0.080329	0.40466	1.02692e-09	7.27603e-08	yes
gene-GIB67_019129	GIB67_019129	16790	rna-gnl|WGS:JACGCM|KingUnif06729.1	GO:0004672(protein kinase activity);GO:0004674(protein serine/threonine kinase activity);GO:0005524(ATP binding);GO:0005576(extracellular region);GO:0005886(plasma membrane);GO:0006468(protein phosphorylation);GO:0009553(embryo sac development);GO:0010103(stomatal complex morphogenesis);GO:0016020(membrane);GO:0016021(integral component of membrane);GO:0016301(kinase activity);GO:0048481(plant ov…	04016(MAPK signaling pathway - plant)	K20718	EC:2.7.11.1	hypothetical protein AQUCO_01300547v1 [Aquilegia coerulea]	NA	0.375359	0.046379	0.14096	18.1373	0.272434	23.9148	0.468354	0.704081	0.59095	1.04539e-09	7.38222e-08	yes
gene-GIB67_020227	GIB67_020227	3085	rna-gnl|WGS:JACGCM|KingUnif22667.1	GO:0031305(integral component of mitochondrial inner membrane);GO:0033617(mitochondrial respiratory chain complex IV assembly)	NA	NA	NA	Hypoxia induced protein [Macleaya cordata]	NA	0.664698	2.09259	0.650906	7.40666	2.46514	4.86525	12.458	7.31849	352.888	1.08474e-09	7.6346e-08	yes
gene-GIB67_029279	GIB67_029279	13739	rna-gnl|WGS:JACGCM|KingUnif37685.1	NA	NA	NA	NA	hypothetical protein BVC80_1543g7 [Macleaya cordata]	NA	0	0	0	0.429541	0	0.567896	17.2427	15.6217	2.89222	1.09884e-09	7.68463e-08	yes
gene-GIB67_042328	GIB67_042328	36386	rna-gnl|WGS:JACGCM|KingUnif03785.1	GO:0016020(membrane);GO:0016709(oxidoreductase activity, acting on paired donors, with incorporation or reduction of molecular oxygen, NAD(P)H as one donor, and incorporation of one atom of oxygen);GO:0044550(secondary metabolite biosynthetic process)	NA	NA	NA	cytochrome P450 71A1-like [Papaver somniferum]	NA	46.8082	98.2251	101.4	5.84136	0.538843	11.4924	2.02374	5.59178	1.22037	1.0991e-09	7.68463e-08	yes
gene-GIB67_043248	GIB67_043248	40337	rna-gnl|WGS:JACGCM|KingUnif40439.1	GO:0005576(extracellular region);GO:0009506(plasmodesma);GO:0016020(membrane);GO:0051707(response to other organism)	03440(Homologous recombination)	K12173	NA	PREDICTED: thaumatin-like protein [Nelumbo nucifera]	NA	2.42613	0.248872	0	386.004	6.01191	415.672	5.34795	7.98657	2.83747	1.10364e-09	7.69096e-08	yes
gene-GIB67_042682	GIB67_042682	3665	rna-gnl|WGS:JACGCM|KingUnif16643.1	NA	NA	NA	NA		NA	10.5025	2.78641	4.71712	11.3126	15.066	14.1671	65.5863	78.3822	95.0543	1.11334e-09	7.71405e-08	yes
gene-GIB67_001408	GIB67_001408	14134	rna-gnl|WGS:JACGCM|KingUnif18950.1	NA	NA	NA	NA	hypothetical protein BVC80_857g45 [Macleaya cordata]	NA	3.0813	2.98571	0.150263	2.99909	17.4677	17.6931	68.4682	260.948	65.955	1.11423e-09	7.71405e-08	yes
gene-GIB67_033392	GIB67_033392	31152	rna-gnl|WGS:JACGCM|KingUnif34323.1	GO:0000287(magnesium ion binding);GO:0008152(metabolic process);GO:0009507(chloroplast);GO:0010333(terpene synthase activity);GO:0016114(terpenoid biosynthetic process);GO:0034007(S-linalool synthase activity);GO:0043693(monoterpene biosynthetic process)	00902(Monoterpenoid biosynthesis)	K15086	EC:4.2.3.25	(3S,6E)-nerolidol synthase 1, chloroplastic [Vitis vinifera]	NA	0.354488	1.12336	16.3819	0.168965	0.079408	0.206694	0	0.04371	0	1.16798e-09	8.05983e-08	yes
gene-GIB67_034511	GIB67_034511	592	rna-gnl|WGS:JACGCM|KingUnif13792.1	GO:0000154(rRNA modification);GO:0030515(snoRNA binding);GO:0031428(box C/D snoRNP complex);GO:0032040(small-subunit processome)	03008(Ribosome biogenesis in eukaryotes)	K14565	NA	PREDICTED: probable nucleolar protein 5-1 [Musa acuminata subsp. malaccensis]	NA	251.633	857.178	720.439	2.5507	17.8415	15.7922	16.0613	76.171	8.95431	1.17399e-09	8.07496e-08	yes
gene-GIB67_031334	GIB67_031334	30875	rna-gnl|WGS:JACGCM|KingUnif30773.1	GO:0004792(thiosulfate sulfurtransferase activity);GO:0005737(cytoplasm);GO:0007568(aging);GO:0009507(chloroplast);GO:0016740(transferase activity)	NA	NA	NA	PREDICTED: thiosulfate sulfurtransferase 18 isoform X1 [Solanum tuberosum]	NA	0.203194	2.94263	2.8843	0	0	0	0	0.014639	0.025384	1.22325e-09	8.38656e-08	yes
gene-GIB67_004741	GIB67_004741	7700	rna-gnl|WGS:JACGCM|KingUnif15705.1	GO:0000226(microtubule cytoskeleton organization);GO:0004674(protein serine/threonine kinase activity);GO:0005524(ATP binding);GO:0005886(plasma membrane);GO:0006468(protein phosphorylation);GO:0007169(transmembrane receptor protein tyrosine kinase signaling pathway);GO:0009504(cell plate);GO:0009506(plasmodesma);GO:0010103(stomatal complex morphogenesis);GO:0016301(kinase activity);GO:0046777(pr…	NA	NA	NA	Serine/threonine protein kinase [Parasponia andersonii]	NA	0.115215	0.089739	0.039494	15.2898	0.225069	16.0401	2.52417	1.01658	0.963657	1.24871e-09	8.52696e-08	yes
gene-GIB67_005621	GIB67_005621	10386	rna-gnl|WGS:JACGCM|KingUnif04361.1	GO:0005737(cytoplasm);GO:0008270(zinc ion binding);GO:0009617(response to bacterium);GO:0009626(plant-type hypersensitive response);GO:0009809(lignin biosynthetic process);GO:0045551(cinnamyl-alcohol dehydrogenase activity);GO:0052747(sinapyl alcohol dehydrogenase activity);GO:0055114(oxidation-reduction process)	00940(Phenylpropanoid biosynthesis)	K00083	EC:1.1.1.195	PREDICTED: probable mannitol dehydrogenase isoform X2 [Vitis vinifera]	NA	3.48228	3.30379	7.67071	43.531	38.8031	89.81	44.5178	81.1939	121.424	1.25308e-09	8.52696e-08	yes
gene-GIB67_003689	GIB67_003689	27659	rna-gnl|WGS:JACGCM|KingUnif09730.1	GO:0009416(response to light stimulus);GO:0009535(chloroplast thylakoid membrane);GO:0009768(photosynthesis, light harvesting in photosystem I);GO:0009941(chloroplast envelope);GO:0010287(plastoglobule);GO:0016168(chlorophyll binding);GO:0031409(pigment binding)	00196(Photosynthesis - antenna proteins)	K14172	NA	chlorophyll a-b binding protein 7, chloroplastic-like isoform X1 [Papaver somniferum]	NA	8.98877	2.43742	5.63769	8.06925	2.17713	3.18302	0	0.056886	0	1.2558e-09	8.52696e-08	yes
gene-GIB67_000063	GIB67_000063	5505	rna-gnl|WGS:JACGCM|KingUnif37705.1	GO:0003674(molecular_function);GO:0005575(cellular_component);GO:0008150(biological_process)	NA	NA	NA	uncharacterized protein LOC113749525 [Coffea eugenioides]	NA	2.88267	8.40573	3.32106	0	0.149014	0.10226	0.130501	0.098392	0.052614	1.29407e-09	8.75878e-08	yes
gene-GIB67_000680	GIB67_000680	12053	rna-gnl|WGS:JACGCM|KingUnif20962.1	GO:0004497(monooxygenase activity)	NA	NA	NA	PREDICTED: cytochrome P450 CYP72A219-like [Nelumbo nucifera]	NA	0.139532	0.3032	0.583815	3.33025	4.78781	5.81152	10.4883	21.8258	4.87922	1.33009e-09	8.9739e-08	yes
gene-GIB67_020621	GIB67_020621	25909	rna-gnl|WGS:JACGCM|KingUnif04709.1	GO:0003674(molecular_function);GO:0005886(plasma membrane)	NA	NA	NA	protein of unknown function DUF1336 [Macleaya cordata]	NA	5.10177	5.93737	18.5752	1.83379	0.800979	0.916773	0.227179	0.482621	0.220454	1.36227e-09	9.16178e-08	yes
gene-GIB67_016882	GIB67_016882	27729	rna-gnl|WGS:JACGCM|KingUnif28392.1	GO:0009699(phenylpropanoid biosynthetic process);GO:0042349(guiding stereospecific synthesis activity)	00970(Aminoacyl-tRNA biosynthesis)	K01870	EC:6.1.1.5	Plant disease resistance response protein [Macleaya cordata]	NA	0.115303	0	0	3.29599	3.99644	14.5876	16.4928	11.1689	3.92978	1.39985e-09	9.38476e-08	yes
gene-GIB67_006449	GIB67_006449	11631	rna-gnl|WGS:JACGCM|KingUnif34142.1	GO:0003677(DNA binding);GO:0003700(DNA binding transcription factor activity);GO:0005515(protein binding);GO:0005634(nucleus);GO:0006351(transcription, DNA-templated);GO:0006355(regulation of transcription, DNA-templated);GO:0009793(embryo development ending in seed dormancy);GO:0042803(protein homodimerization activity);GO:0046872(metal ion binding)	NA	NA	NA	PREDICTED: zinc-finger homeodomain protein 1-like [Nelumbo nucifera]	NA	0.208126	0	0	14.4575	0.075735	13.4066	0	0	0	1.44023e-09	9.62502e-08	yes
gene-GIB67_008428	GIB67_008428	15042	rna-gnl|WGS:JACGCM|KingUnif09039.1	GO:0004674(protein serine/threonine kinase activity);GO:0005886(plasma membrane);GO:0006468(protein phosphorylation);GO:0006952(defense response);GO:0009506(plasmodesma)	NA	NA	NA	hypothetical protein CICLE_v10007443mg [Citrus clementina]	NA	57.1713	15.6538	3.75724	0.138021	0.423864	0	1.06816	1.29296	1.39543	1.45292e-09	9.67925e-08	yes
gene-GIB67_004286	GIB67_004286	19670	rna-gnl|WGS:JACGCM|KingUnif02842.1	GO:0015079(potassium ion transmembrane transporter activity);GO:0016020(membrane)	NA	NA	NA	PREDICTED: potassium transporter 6-like [Nelumbo nucifera]	NA	18.5118	52.1239	68.5947	4.43773	4.96971	7.49824	1.7865	7.2971	2.79341	1.49223e-09	9.90997e-08	yes
gene-GIB67_015701	GIB67_015701	6403	rna-gnl|WGS:JACGCM|KingUnif11487.1	GO:0004842(ubiquitin-protein transferase activity);GO:0005524(ATP binding);GO:0005737(cytoplasm);GO:0006511(ubiquitin-dependent protein catabolic process);GO:0016740(transferase activity);GO:0016925(protein sumoylation)	04141(Protein processing in endoplasmic reticulum);04120(Ubiquitin mediated proteolysis)	K06689	EC:2.3.2.23	ubiquitin-conjugating enzyme E2 28 isoform X2 [Prunus persica]	NA	54.4355	69.1781	33.6571	2.06417	2.59368	2.89268	4.838	22.792	5.7554	1.49792e-09	9.9167e-08	yes
gene-GIB67_007633	GIB67_007633	16040	rna-gnl|WGS:JACGCM|KingUnif10322.1	GO:0003674(molecular_function);GO:0005634(nucleus);GO:0008150(biological_process)	NA	NA	NA	hypothetical protein BVC80_1835g94 [Macleaya cordata]	NA	0	0	0	7.99954	0.058127	7.03278	0.920565	0.652092	0.787854	1.54279e-09	1.01819e-07	yes
gene-GIB67_042839	GIB67_042839	7127	rna-gnl|WGS:JACGCM|KingUnif00326.1	GO:0009813(flavonoid biosynthetic process);GO:0043231(intracellular membrane-bounded organelle);GO:0052696(flavonoid glucuronidation);GO:0080043(quercetin 3-O-glucosyltransferase activity);GO:0080044(quercetin 7-O-glucosyltransferase activity)	00944(Flavone and flavonol biosynthesis)	K22772	EC:2.4.1.159	UDP-glucuronosyl/UDP-glucosyltransferase [Macleaya cordata]	NA	1.95048	1.63731	0.823803	36.9466	2.43963	77.2715	3.36907	1.24623	1.92393	1.55635e-09	1.02395e-07	yes
gene-GIB67_040036	GIB67_040036	18402	rna-gnl|WGS:JACGCM|KingUnif22214.1	GO:0003674(molecular_function);GO:0005737(cytoplasm);GO:0005783(endoplasmic reticulum);GO:0005789(endoplasmic reticulum membrane);GO:0009658(chloroplast organization);GO:0010274(hydrotropism);GO:0016020(membrane);GO:0032541(cortical endoplasmic reticulum)	NA	NA	NA	PREDICTED: protein MIZU-KUSSEI 1-like [Nelumbo nucifera]	NA	0.043332	0	0	2.92598	7.37011	4.95871	2.30852	3.98042	0.99288	1.63691e-09	1.07362e-07	yes
gene-GIB67_036811	GIB67_036811	30200	rna-gnl|WGS:JACGCM|KingUnif09628.1	GO:0010143(cutin biosynthetic process);GO:0016020(membrane);GO:0016311(dephosphorylation);GO:0016791(phosphatase activity);GO:0090447(glycerol-3-phosphate 2-O-acyltransferase activity)	00561(Glycerolipid metabolism);00564(Glycerophospholipid metabolism)	K13508	EC:2.3.1.15;EC:2.3.1.198	hypothetical protein AQUCO_00400312v1 [Aquilegia coerulea]	NA	0.032862	0.065651	0	0.71433	1.20971	7.14202	5.98867	7.23369	6.47183	1.69211e-09	1.1064e-07	yes
gene-GIB67_035520	GIB67_035520	24727	rna-gnl|WGS:JACGCM|KingUnif17948.1	GO:0005737(cytoplasm);GO:0030001(metal ion transport);GO:0046914(transition metal ion binding);GO:0046916(cellular transition metal ion homeostasis)	NA	NA	NA	hypothetical protein AQUCO_00300637v1 [Aquilegia coerulea]	NA	4.98694	20.0467	14.188	0.232637	0.421622	0.403134	0.592392	3.13037	0.436986	1.88182e-09	1.22641e-07	yes
gene-GIB67_005694	GIB67_005694	10457	rna-gnl|WGS:JACGCM|KingUnif40249.1	GO:0051213(dioxygenase activity)	00941(Flavonoid biosynthesis)	K05278	EC:1.14.20.6	2OG-FeII_Oxy domain-containing protein/DIOX_N domain-containing protein [Cephalotus follicularis]	NA	0.532737	0.34748	0	5.47194	28.3902	3.88993	49.5527	94.522	17.6212	1.88723e-09	1.22641e-07	yes
gene-GIB67_030072	GIB67_030072	17510	rna-gnl|WGS:JACGCM|KingUnif06313.1	GO:0003674(molecular_function);GO:0005634(nucleus);GO:0008150(biological_process)	NA	NA	NA	PREDICTED: uncharacterized protein LOC104101135 [Nicotiana tomentosiformis]	NA	0.333496	3.58155	0.727937	39.2978	11.0392	102.498	0.898521	2.49349	1.28345	1.96e-09	1.2681e-07	yes
gene-GIB67_035313	GIB67_035313	42035	rna-gnl|WGS:JACGCM|KingUnif09996.1	GO:0005515(protein binding);GO:0005634(nucleus);GO:0005737(cytoplasm);GO:0007049(cell cycle);GO:0016538(cyclin-dependent protein serine/threonine kinase regulator activity);GO:0051301(cell division);GO:0051726(regulation of cell cycle)	NA	NA	NA	PREDICTED: cyclin-A1-4 [Nelumbo nucifera]	NA	0	0	0	3.98799	0.114609	11.0866	1.29234	0.258884	0.607036	1.96335e-09	1.2681e-07	yes
gene-GIB67_012115	GIB67_012115	13394	rna-gnl|WGS:JACGCM|KingUnif29474.1	GO:0003674(molecular_function);GO:0005634(nucleus);GO:0008150(biological_process)	NA	NA	NA	uncharacterized protein LOC110114690 [Dendrobium catenatum]	NA	1.17481	0.545458	0.155726	33.1321	0.379203	32.2186	0.136659	0.491755	0.177493	1.98696e-09	1.27944e-07	yes
gene-GIB67_019326	GIB67_019326	28409	rna-gnl|WGS:JACGCM|KingUnif11053.1	GO:0005345(purine nucleobase transmembrane transporter activity);GO:0005515(protein binding);GO:0005887(integral component of plasma membrane);GO:0006863(purine nucleobase transport);GO:0009507(chloroplast);GO:0010184(cytokinin transport);GO:0015211(purine nucleoside transmembrane transporter activity);GO:0016021(integral component of membrane)	00010(Glycolysis / Gluconeogenesis);00030(Pentose phosphate pathway);00051(Fructose and mannose metabolism);00052(Galactose metabolism);03018(RNA degradation)	K00850	EC:2.7.1.11	hypothetical protein AQUCO_01000090v1 [Aquilegia coerulea]	NA	0.086155	0.145263	0.348102	12.5678	3.79901	36.7803	18.4215	2.45331	15.3613	2.03472e-09	1.30623e-07	yes
gene-GIB67_043207	GIB67_043207	9930	rna-gnl|WGS:JACGCM|KingUnif20668.1	GO:0004497(monooxygenase activity);GO:0007275(multicellular organism development);GO:0010268(brassinosteroid homeostasis);GO:0016125(sterol metabolic process);GO:0016132(brassinosteroid biosynthetic process)	NA	NA	NA	beta-amyrin 28-oxidase-like [Quercus suber]	NA	0.258075	0	0.100061	5.03219	8.98518	71.9115	33.4768	67.4428	11.6924	2.12643e-09	1.36098e-07	yes
gene-GIB67_019324	GIB67_019324	28403	rna-gnl|WGS:JACGCM|KingUnif20542.1	GO:0005576(extracellular region);GO:0008150(biological_process);GO:0030247(polysaccharide binding)	NA	NA	NA	PREDICTED: wall-associated receptor kinase-like 15 [Nelumbo nucifera]	NA	22.2914	32.3722	14.5467	0.94444	1.28402	2.12705	5.12704	3.96729	3.91348	2.14824e-09	1.3708e-07	yes
gene-GIB67_032452	GIB67_032452	38529	rna-gnl|WGS:JACGCM|KingUnif00299.1	GO:0006508(proteolysis);GO:0008233(peptidase activity);GO:0009507(chloroplast);GO:0016021(integral component of membrane)	00970(Aminoacyl-tRNA biosynthesis)	K01883	EC:6.1.1.16	uncharacterized protein LOC107430503 isoform X2 [Ziziphus jujuba]	NA	70.0669	15.0207	100.948	11.1664	5.48994	5.73123	4.6724	5.53362	4.26095	2.17768e-09	1.38541e-07	yes
gene-GIB67_012940	GIB67_012940	11493	rna-gnl|WGS:JACGCM|KingUnif01704.1	GO:0004674(protein serine/threonine kinase activity);GO:0005634(nucleus);GO:0005737(cytoplasm);GO:0005886(plasma membrane);GO:0035556(intracellular signal transduction)	NA	NA	NA	Protein kinase domain [Macleaya cordata]	NA	0	0	0	0.187627	0.160691	0.145456	1.97901	1.47602	1.79496	2.38098e-09	1.51021e-07	yes
gene-GIB67_026779	GIB67_026779	22864	rna-gnl|WGS:JACGCM|KingUnif21804.1	GO:0004365(glyceraldehyde-3-phosphate dehydrogenase (NAD+) (phosphorylating) activity);GO:0005829(cytosol);GO:0006006(glucose metabolic process);GO:0006096(glycolytic process);GO:0009409(response to cold);GO:0009416(response to light stimulus);GO:0009507(chloroplast);GO:0009535(chloroplast thylakoid membrane);GO:0009570(chloroplast stroma);GO:0009744(response to sucrose);GO:0009941(chloroplast en…	00710(Carbon fixation in photosynthetic organisms)	K05298	EC:1.2.1.13	PREDICTED: glyceraldehyde-3-phosphate dehydrogenase B, chloroplastic [Malus domestica]	NA	11.4241	0.2232	85.4241	0.423496	0.075792	0.637174	0.755333	0.328568	0.237433	2.4049e-09	1.52083e-07	yes
gene-GIB67_022008	GIB67_022008	3624	rna-gnl|WGS:JACGCM|KingUnif16133.1	NA	NA	NA	NA		NA	17.2045	2.20436	3.85359	13.2248	51.5455	51.1031	188.74	249.738	182.709	2.41958e-09	1.52556e-07	yes
gene-GIB67_001104	GIB67_001104	23502	rna-gnl|WGS:JACGCM|KingUnif20839.1	GO:0004503(monophenol monooxygenase activity);GO:0036263(L-DOPA monooxygenase activity)	00350(Tyrosine metabolism);00950(Isoquinoline alkaloid biosynthesis)	K00422	EC:1.10.3.1	Tyrosinase [Macleaya cordata]	NA	0.261684	0	0	13.9855	0.137916	146.954	0.173453	0.186806	0.094367	2.71649e-09	1.70768e-07	yes
gene-GIB67_018100	GIB67_018100	5709	rna-gnl|WGS:JACGCM|KingUnif15009.1	GO:0004674(protein serine/threonine kinase activity);GO:0005886(plasma membrane);GO:0006468(protein phosphorylation);GO:0009506(plasmodesma);GO:0031625(ubiquitin protein ligase binding);GO:0045087(innate immune response)	NA	NA	NA	Protein kinase domain [Macleaya cordata]	NA	0.22734	0.117732	0.418047	1.98205	7.8529	2.29154	9.33354	14.6623	9.69967	2.83995e-09	1.78001e-07	yes
gene-GIB67_033109	GIB67_033109	17339	rna-gnl|WGS:JACGCM|KingUnif23994.1	GO:0051213(dioxygenase activity)	00941(Flavonoid biosynthesis)	K05278	EC:1.14.20.6	PREDICTED: flavonol synthase/flavanone 3-hydroxylase [Eucalyptus grandis]	NA	0.469396	2.17896	1.40667	48.5759	18.3761	110.509	24.998	4.57339	26.4958	2.92124e-09	1.82556e-07	yes
gene-GIB67_033010	GIB67_033010	17242	rna-gnl|WGS:JACGCM|KingUnif08217.1	GO:0004672(protein kinase activity);GO:0004674(protein serine/threonine kinase activity);GO:0005524(ATP binding);GO:0005886(plasma membrane);GO:0006468(protein phosphorylation);GO:0016021(integral component of membrane)	NA	NA	NA	Protein kinase domain [Macleaya cordata]	NA	0.030883	0.044896	0	8.90742	0.779972	14.9324	5.37795	0.800324	1.24682	2.93029e-09	1.82583e-07	yes
gene-GIB67_033383	GIB67_033383	31144	rna-gnl|WGS:JACGCM|KingUnif28329.1	GO:0000287(magnesium ion binding);GO:0008152(metabolic process);GO:0009507(chloroplast);GO:0010333(terpene synthase activity);GO:0016114(terpenoid biosynthetic process);GO:0034007(S-linalool synthase activity);GO:0043693(monoterpene biosynthetic process)	00902(Monoterpenoid biosynthesis)	K15086	EC:4.2.3.25	(3S,6E)-nerolidol synthase 1, chloroplastic [Vitis vinifera]	NA	0.573884	1.45626	15.9353	0.176904	0.103922	0.169268	0	0.073074	0	2.94596e-09	1.83021e-07	yes
gene-GIB67_015246	GIB67_015246	19257	rna-gnl|WGS:JACGCM|KingUnif24276.1	GO:0001653(peptide receptor activity);GO:0004674(protein serine/threonine kinase activity);GO:0004714(transmembrane receptor protein tyrosine kinase activity);GO:0005515(protein binding);GO:0005524(ATP binding);GO:0005886(plasma membrane);GO:0010051(xylem and phloem pattern formation);GO:0010311(lateral root formation);GO:0016021(integral component of membrane);GO:0016301(kinase activity);GO:0017…	NA	NA	NA	hypothetical protein AQUCO_01500220v1 [Aquilegia coerulea]	NA	12.6588	34.1592	23.3347	0.579369	1.05904	1.59045	1.65494	6.44141	0.703143	2.95509e-09	1.83051e-07	yes
gene-GIB67_004455	GIB67_004455	19850	rna-gnl|WGS:JACGCM|KingUnif13409.1	GO:0005576(extracellular region);GO:0005783(endoplasmic reticulum);GO:0006633(fatty acid biosynthetic process);GO:0016020(membrane);GO:0016746(transferase activity, transferring acyl groups);GO:0102336(3-oxo-arachidoyl-CoA synthase activity);GO:0102337(3-oxo-cerotoyl-CoA synthase activity);GO:0102338(3-oxo-lignoceronyl-CoA synthase activity);GO:0102756(very-long-chain 3-ketoacyl-CoA synthase acti…	00062(Fatty acid elongation)	K15397	EC:2.3.1.199	PREDICTED: 3-ketoacyl-CoA synthase 12-like [Nelumbo nucifera]	NA	0	0	0	1.31617	0	10.6845	0	0	0	2.9796e-09	1.83876e-07	yes
gene-GIB67_029067	GIB67_029067	14400	rna-gnl|WGS:JACGCM|KingUnif34090.1	GO:0003674(molecular_function);GO:0005634(nucleus);GO:0010075(regulation of meristem growth)	NA	NA	NA	conserved hypothetical protein [Ricinus communis]	NA	0.225129	0.077582	0	5.64222	0.267515	11.3687	0	0	0	2.98575e-09	1.83876e-07	yes
gene-GIB67_012994	GIB67_012994	24560	rna-gnl|WGS:JACGCM|KingUnif22383.1	GO:0004674(protein serine/threonine kinase activity);GO:0005886(plasma membrane)	NA	NA	NA	PREDICTED: LRR receptor-like serine/threonine-protein kinase GSO2 [Nelumbo nucifera]	NA	1.44425	2.10855	1.23866	46.9833	2.6367	41.514	2.93516	3.27751	2.37959	3.01759e-09	1.85298e-07	yes
gene-GIB67_008144	GIB67_008144	19197	rna-gnl|WGS:JACGCM|KingUnif38574.1	GO:0008202(steroid metabolic process);GO:0009507(chloroplast);GO:0009737(response to abscisic acid);GO:0009741(response to brassinosteroid);GO:0016491(oxidoreductase activity);GO:0070524(11-beta-hydroxysteroid dehydrogenase (NADP+) activity);GO:0072555(17-beta-ketosteroid reductase activity);GO:0072582(17-beta-hydroxysteroid dehydrogenase (NADP+) activity)	00906(Carotenoid biosynthesis)	K09841	EC:1.1.1.288	hypothetical protein AQUCO_01100092v1 [Aquilegia coerulea]	NA	0	0	0	1.72436	0	10.9447	0	0	0	3.05911e-09	1.87304e-07	yes
gene-GIB67_026946	GIB67_026946	3735	rna-gnl|WGS:JACGCM|KingUnif32178.1	GO:0000139(Golgi membrane);GO:0000271(polysaccharide biosynthetic process);GO:0000977(RNA polymerase II regulatory region sequence-specific DNA binding);GO:0005794(Golgi apparatus);GO:0005886(plasma membrane);GO:0009833(plant-type primary cell wall biogenesis);GO:0016021(integral component of membrane);GO:0016740(transferase activity);GO:0016757(transferase activity, transferring glycosyl groups)…	NA	NA	NA	Cellulose synthase [Macleaya cordata]	NA	0.634682	1.51872	43.8416	0.144841	0.298624	0.213925	0.447734	0.589516	0.252403	3.12875e-09	1.91016e-07	yes
gene-GIB67_032667	GIB67_032667	17992	rna-gnl|WGS:JACGCM|KingUnif04079.1	GO:0004674(protein serine/threonine kinase activity);GO:0005886(plasma membrane);GO:0006468(protein phosphorylation);GO:0006952(defense response);GO:0009506(plasmodesma)	NA	NA	NA	PREDICTED: G-type lectin S-receptor-like serine/threonine-protein kinase At4g27290 [Nelumbo nucifera]	NA	0.388723	0.618705	0.262056	2.63283	4.47977	3.84361	9.04322	3.96612	14.818	3.34823e-09	2.03828e-07	yes
gene-GIB67_041257	GIB67_041257	10065	rna-gnl|WGS:JACGCM|KingUnif17782.1	GO:0005737(cytoplasm);GO:0009807(lignan biosynthetic process);GO:0032442(phenylcoumaran benzylic ether reductase activity);GO:0046686(response to cadmium ion);GO:0050664(oxidoreductase activity, acting on NAD(P)H, oxygen as acceptor);GO:0055114(oxidation-reduction process)	NA	NA	NA	Isoflavone reductase-like protein IRL [Cinnamomum micranthum f. kanehirae]	NA	7.337	3.31217	30.8806	3.52045	2.419	2.49432	0.057514	0.45644	0.122986	3.40627e-09	2.06768e-07	yes
gene-GIB67_043182	GIB67_043182	9901	rna-gnl|WGS:JACGCM|KingUnif13983.1	GO:0005576(extracellular region);GO:0016042(lipid catabolic process);GO:0016788(hydrolase activity, acting on ester bonds);GO:0052689(carboxylic ester hydrolase activity)	00561(Glycerolipid metabolism)	K00679	EC:2.3.1.158	hypothetical protein AQUCO_01800180v1 [Aquilegia coerulea]	NA	0.149966	0	0	7.77062	0.262303	24.8121	0.048914	0	0.060899	3.42901e-09	2.07553e-07	yes
gene-GIB67_017946	GIB67_017946	22597	rna-gnl|WGS:JACGCM|KingUnif31961.1	NA	NA	NA	NA		NA	43.3891	48.3328	50.0637	1.91484	2.21731	3.20212	15.3853	37.511	15.4306	3.45133e-09	2.08309e-07	yes
gene-GIB67_042327	GIB67_042327	36384	rna-gnl|WGS:JACGCM|KingUnif03253.1	GO:0016020(membrane);GO:0016709(oxidoreductase activity, acting on paired donors, with incorporation or reduction of molecular oxygen, NAD(P)H as one donor, and incorporation of one atom of oxygen);GO:0044550(secondary metabolite biosynthetic process)	NA	NA	NA	cytochrome P450 71A1-like [Papaver somniferum]	NA	45.3571	74.9945	99.0763	5.73905	0.538307	11.2725	1.92271	5.55705	1.13494	3.49615e-09	2.10414e-07	yes
gene-GIB67_035552	GIB67_035552	36629	rna-gnl|WGS:JACGCM|KingUnif30580.1	GO:0005634(nucleus);GO:0009739(response to gibberellin);GO:0030912(response to deep water)	NA	NA	NA	PREDICTED: growth-regulating factor 1 [Nelumbo nucifera]	NA	0.059337	0	0	9.70332	1.81464	35.4783	7.57805	0.611867	1.32273	3.5309e-09	2.11904e-07	yes
gene-GIB67_008766	GIB67_008766	2484	rna-gnl|WGS:JACGCM|KingUnif01225.1	GO:0030599(pectinesterase activity);GO:0046910(pectinesterase inhibitor activity);GO:0071944(cell periphery)	00040(Pentose and glucuronate interconversions)	K01051	EC:3.1.1.11	hypothetical protein AQUCO_01300689v1 [Aquilegia coerulea]	NA	15.7404	0.464089	35.4351	0.680427	0.585948	0.737486	0.700325	0.649667	0.603762	3.57372e-09	2.13868e-07	yes
gene-GIB67_012248	GIB67_012248	25801	rna-gnl|WGS:JACGCM|KingUnif35847.1	GO:0003680(AT DNA binding);GO:0003700(DNA binding transcription factor activity);GO:0005634(nucleus);GO:0006351(transcription, DNA-templated);GO:0006355(regulation of transcription, DNA-templated);GO:0045087(innate immune response);GO:0045824(negative regulation of innate immune response)	NA	NA	NA	hypothetical protein AQUCO_00900901v1 [Aquilegia coerulea]	NA	0.316411	4.36445	1.11035	11.4465	27.6232	33.5304	92.8762	77.8744	44.4731	3.78034e-09	2.2525e-07	yes
gene-GIB67_005123	GIB67_005123	5747	rna-gnl|WGS:JACGCM|KingUnif24033.1	GO:0005507(copper ion binding);GO:0009809(lignin biosynthetic process);GO:0016722(oxidoreductase activity, oxidizing metal ions)	NA	NA	NA	PREDICTED: uncharacterized protein LOC104600168 [Nelumbo nucifera]	NA	9.40569	124.523	68.9928	1.97225	0.488168	5.23513	2.54335	6.52287	2.04727	3.78517e-09	2.2525e-07	yes
gene-GIB67_018964	GIB67_018964	26031	rna-gnl|WGS:JACGCM|KingUnif04974.1	NA	00030(Pentose phosphate pathway)	K00616	EC:2.2.1.2	Transaldolase [Macleaya cordata]	NA	0.28461	0	0.472238	0	0	0.257095	10.8846	7.72713	28.2389	3.8405e-09	2.27902e-07	yes
gene-GIB67_004822	GIB67_004822	32984	rna-gnl|WGS:JACGCM|KingUnif13487.1	NA	NA	NA	NA	uncharacterized protein LOC8284330 [Ricinus communis]	NA	2.06189	3.6517	3.22785	0	0	0	0.139846	0.220458	0.18405	4.0835e-09	2.41645e-07	yes
gene-GIB67_020235	GIB67_020235	3077	rna-gnl|WGS:JACGCM|KingUnif20074.1	GO:0004601(peroxidase activity);GO:0005515(protein binding);GO:0005576(extracellular region);GO:0005618(cell wall);GO:0005794(Golgi apparatus);GO:0005829(cytosol);GO:0006979(response to oxidative stress);GO:0009809(lignin biosynthetic process);GO:0010089(xylem development);GO:0020037(heme binding);GO:0042744(hydrogen peroxide catabolic process);GO:0046872(metal ion binding);GO:0048046(apoplast);G…	00940(Phenylpropanoid biosynthesis)	K00430	EC:1.11.1.7	Peroxidase 68 [Cinnamomum micranthum f. kanehirae]	NA	0.092456	0.065335	0.191411	2.46532	6.41666	1.04815	1.27314	97.2073	5.23237	4.12028e-09	2.43142e-07	yes
gene-GIB67_018176	GIB67_018176	8832	rna-gnl|WGS:JACGCM|KingUnif35002.1	GO:0009570(chloroplast stroma);GO:0044183(protein binding involved in protein folding);GO:0061077(chaperone-mediated protein folding)	NA	NA	NA	PREDICTED: uncharacterized protein LOC108227641 [Daucus carota subsp. sativus]	NA	14.8945	33.4492	155.305	8.79195	4.08807	9.52223	2.93856	3.70221	0.98739	4.22787e-09	2.48798e-07	yes
gene-GIB67_034654	GIB67_034654	4345	rna-gnl|WGS:JACGCM|KingUnif32127.1	GO:0008150(biological_process)	NA	NA	NA	Proteolipid membrane potential modulator [Macleaya cordata]	NA	53.0431	20.122	31.5099	133.475	148.947	309.28	681.333	397.56	483.569	4.24016e-09	2.4883e-07	yes
gene-GIB67_040556	GIB67_040556	39442	rna-gnl|WGS:JACGCM|KingUnif21846.1	GO:0000790(nuclear chromatin);GO:0003677(DNA binding);GO:0006342(chromatin silencing)	NA	NA	NA	histone H2A [Ziziphus jujuba]	NA	6.61639	9.26945	4.16699	299.707	17.7191	188.99	30.816	35.2442	21.699	4.41596e-09	2.57787e-07	yes
gene-GIB67_003238	GIB67_003238	35350	rna-gnl|WGS:JACGCM|KingUnif00069.1	GO:0005576(extracellular region);GO:0005618(cell wall);GO:0005794(Golgi apparatus);GO:0005829(cytosol);GO:0006952(defense response);GO:0007165(signal transduction);GO:0009505(plant-type cell wall);GO:0009506(plasmodesma);GO:0016020(membrane);GO:0090353(polygalacturonase inhibitor activity)	NA	NA	NA	hypothetical protein AQUCO_00900341v1 [Aquilegia coerulea]	NA	1.30474	1.05827	0.742897	2.46338	7.8015	4.918	8.7172	30.4188	29.7465	4.41712e-09	2.57787e-07	yes
gene-GIB67_004398	GIB67_004398	19786	rna-gnl|WGS:JACGCM|KingUnif11853.1	GO:0005737(cytoplasm);GO:0008270(zinc ion binding);GO:0009735(response to cytokinin);GO:0009809(lignin biosynthetic process);GO:0045551(cinnamyl-alcohol dehydrogenase activity);GO:0048046(apoplast);GO:0052747(sinapyl alcohol dehydrogenase activity);GO:0055114(oxidation-reduction process)	00940(Phenylpropanoid biosynthesis)	K00083	EC:1.1.1.195	putative mannitol dehydrogenase isoform X2 [Cinnamomum micranthum f. kanehirae]	NA	0.176006	0.538423	0	28.1185	2.17129	43.03	2.05037	0.611885	0.813146	4.89508e-09	2.84897e-07	yes
gene-GIB67_017620	GIB67_017620	33216	rna-gnl|WGS:JACGCM|KingUnif40776.1	GO:0005509(calcium ion binding)	NA	NA	NA	Protein detoxification 48 [Vitis vinifera]	NA	225.928	653.079	336.522	5.51475	11.4705	5.47022	7.58377	109.234	4.08709	5.2029e-09	3.01982e-07	yes
gene-GIB67_026174	GIB67_026174	28042	rna-gnl|WGS:JACGCM|KingUnif00650.1	GO:0009044(xylan 1,4-beta-xylosidase activity);GO:0009505(plant-type cell wall);GO:0031222(arabinan catabolic process);GO:0045493(xylan catabolic process);GO:0046556(alpha-L-arabinofuranosidase activity)	00520(Amino sugar and nucleotide sugar metabolism)	K15920	EC:3.2.1.37	Glycoside hydrolase [Macleaya cordata]	NA	0.024424	0.039237	0.16575	7.99103	0.715014	8.28978	7.69344	9.19871	3.0191	5.22992e-09	3.02721e-07	yes
gene-GIB67_038048	GIB67_038048	24778	rna-gnl|WGS:JACGCM|KingUnif35528.1	GO:0004805(trehalose-phosphatase activity);GO:0005737(cytoplasm);GO:0005992(trehalose biosynthetic process)	00500(Starch and sucrose metabolism)	K01087	EC:3.1.3.12	hypothetical protein AQUCO_01300699v1 [Aquilegia coerulea]	NA	10.815	9.26884	42.4213	97.7732	139.914	78.9939	7.70475	5.31534	8.61947	5.31121e-09	3.06589e-07	yes
gene-GIB67_033999	GIB67_033999	26800	rna-gnl|WGS:JACGCM|KingUnif20873.1	GO:0003674(molecular_function);GO:0005576(extracellular region);GO:0051707(response to other organism)	NA	NA	NA	Thaumatin [Macleaya cordata]	NA	0	0	0	0	0.218695	0	2.63178	13.2551	1.17924	5.59401e-09	3.22036e-07	yes
gene-GIB67_032582	GIB67_032582	31745	rna-gnl|WGS:JACGCM|KingUnif11284.1	GO:0005247(voltage-gated chloride channel activity);GO:0005253(anion channel activity);GO:0005515(protein binding);GO:0005622(intracellular);GO:0005774(vacuolar membrane);GO:0006821(chloride transport);GO:0009705(plant-type vacuole membrane);GO:0034707(chloride channel complex);GO:0034765(regulation of ion transmembrane transport);GO:1902476(chloride transmembrane transport)	NA	NA	NA	hypothetical protein CDL15_Pgr015371 [Punica granatum]	NA	2.01582	7.41354	4.15105	0	0	0	1.67661	2.00605	2.10153	5.69238e-09	3.26398e-07	yes
gene-GIB67_001845	GIB67_001845	33124	rna-gnl|WGS:JACGCM|KingUnif09712.1	GO:0004190(aspartic-type endopeptidase activity);GO:0006508(proteolysis);GO:0030163(protein catabolic process)	NA	NA	NA	hypothetical protein AQUCO_00700563v1 [Aquilegia coerulea]	NA	0.152503	0	0	17.9722	0.641446	19.9007	0.249306	0.017338	0.378248	5.70061e-09	3.26398e-07	yes
gene-GIB67_008437	GIB67_008437	15055	rna-gnl|WGS:JACGCM|KingUnif13045.1	GO:0009813(flavonoid biosynthetic process);GO:0043231(intracellular membrane-bounded organelle);GO:0052696(flavonoid glucuronidation);GO:0080043(quercetin 3-O-glucosyltransferase activity);GO:0080044(quercetin 7-O-glucosyltransferase activity)	NA	NA	NA	hypothetical protein AQUCO_00200093v1 [Aquilegia coerulea]	NA	2.60128	10.7117	11.26	0.756086	0.018179	0.187004	0.326661	0.16532	0.050809	5.74531e-09	3.28071e-07	yes
gene-GIB67_030924	GIB67_030924	40171	rna-gnl|WGS:JACGCM|KingUnif31243.1	GO:0005886(plasma membrane);GO:0009416(response to light stimulus);GO:0016567(protein ubiquitination)	03050(Proteasome)	K03063	NA	hypothetical protein AQUCO_01100499v1 [Aquilegia coerulea]	NA	38.6074	24.0969	27.2767	3.97702	2.2993	4.24425	8.73956	8.58303	7.58877	6.03931e-09	3.43932e-07	yes
gene-GIB67_005429	GIB67_005429	10540	rna-gnl|WGS:JACGCM|KingUnif02187.1	GO:0000271(polysaccharide biosynthetic process);GO:0005794(Golgi apparatus);GO:0016757(transferase activity, transferring glycosyl groups)	NA	NA	NA	Glycosyl transferase [Macleaya cordata]	NA	13.2821	10.0402	30.5444	77.1836	168.977	114.438	21.7595	10.4784	11.0917	6.05856e-09	3.44103e-07	yes
gene-GIB67_019686	GIB67_019686	21725	rna-gnl|WGS:JACGCM|KingUnif27681.1	GO:0005576(extracellular region);GO:0006869(lipid transport);GO:0008289(lipid binding)	NA	NA	NA	non-specific lipid-transfer protein 8-like [Hevea brasiliensis]	NA	0	1.63471	1.0058	2.07247	5.34408	3.68939	15.875	235.745	15.5623	6.12242e-09	3.4592e-07	yes
gene-GIB67_026607	GIB67_026607	484	rna-gnl|WGS:JACGCM|KingUnif34454.1	GO:0009813(flavonoid biosynthetic process);GO:0043231(intracellular membrane-bounded organelle);GO:0052696(flavonoid glucuronidation);GO:0080043(quercetin 3-O-glucosyltransferase activity);GO:0080044(quercetin 7-O-glucosyltransferase activity)	NA	NA	NA	hypothetical protein AQUCO_01500237v1 [Aquilegia coerulea]	NA	0.272397	0.119488	0.166421	3.11471	6.15006	7.02232	6.46639	5.18185	2.05303	6.12321e-09	3.4592e-07	yes
gene-GIB67_013016	GIB67_013016	24584	rna-gnl|WGS:JACGCM|KingUnif32570.1	GO:0003674(molecular_function);GO:0005576(extracellular region);GO:0009505(plant-type cell wall);GO:0009506(plasmodesma);GO:0080167(response to karrikin)	NA	NA	NA	hypothetical protein AQUCO_01300645v1 [Aquilegia coerulea]	NA	4.39079	5.41489	8.09707	90.4185	75.6322	58.4844	28.8163	63.2072	38.5663	6.17975e-09	3.48186e-07	yes
gene-GIB67_035900	GIB67_035900	1417	rna-gnl|WGS:JACGCM|KingUnif07449.1	GO:0016020(membrane);GO:0016709(oxidoreductase activity, acting on paired donors, with incorporation or reduction of molecular oxygen, NAD(P)H as one donor, and incorporation of one atom of oxygen);GO:0044550(secondary metabolite biosynthetic process)	00591(Linoleic acid metabolism);00380(Tryptophan metabolism);00232(Caffeine metabolism)	K07409	EC:1.14.14.1	hypothetical protein AQUCO_07700055v1 [Aquilegia coerulea]	NA	0	0	0	1.23704	0.068572	8.40268	0	0.085219	0.080942	6.26766e-09	3.51666e-07	yes
gene-GIB67_036021	GIB67_036021	16435	rna-gnl|WGS:JACGCM|KingUnif36735.1	GO:0046658(anchored component of plasma membrane)	NA	NA	NA	mavicyanin-like isoform X3 [Durio zibethinus]	NA	2.08944	0.101127	0.057917	49.9321	66.2619	102.517	237.839	47.0157	53.7443	6.27471e-09	3.51666e-07	yes
gene-GIB67_008788	GIB67_008788	2509	rna-gnl|WGS:JACGCM|KingUnif08917.1	GO:0005507(copper ion binding);GO:0009505(plant-type cell wall);GO:0009506(plasmodesma);GO:0016722(oxidoreductase activity, oxidizing metal ions);GO:0046658(anchored component of plasma membrane)	NA	NA	NA	hypothetical protein AQUCO_01300695v1 [Aquilegia coerulea]	NA	2.41544	1.18917	0.6608	50.5247	8.94577	62.9101	25.5482	15.8905	10.7834	6.30192e-09	3.52259e-07	yes
gene-GIB67_023373	GIB67_023373	34845	rna-gnl|WGS:JACGCM|KingUnif42999.1	GO:0004601(peroxidase activity);GO:0005576(extracellular region);GO:0006979(response to oxidative stress);GO:0020037(heme binding);GO:0042744(hydrogen peroxide catabolic process);GO:0046872(metal ion binding);GO:0055114(oxidation-reduction process)	00940(Phenylpropanoid biosynthesis)	K00430	EC:1.11.1.7	peroxidase 45-like [Quercus suber]	NA	8.90735	5.10285	2.67405	13.0557	17.8277	127.616	436.005	65.5222	676.745	6.36978e-09	3.55115e-07	yes
gene-GIB67_028903	GIB67_028903	31361	rna-gnl|WGS:JACGCM|KingUnif38394.1	GO:0005576(extracellular region);GO:0006869(lipid transport);GO:0008289(lipid binding)	NA	NA	NA	PREDICTED: non-specific lipid-transfer protein 2-like [Nicotiana tomentosiformis]	NA	6.77565	0	0.698113	21.5525	62.5383	23.0459	181.863	2573.15	88.1759	6.57813e-09	3.65768e-07	yes
gene-GIB67_032162	GIB67_032162	17780	rna-gnl|WGS:JACGCM|KingUnif31081.1	NA	NA	NA	NA	hypothetical protein PanWU01x14_291690 [Parasponia andersonii]	NA	2.12209	17.4409	14.6261	0.270969	0.085181	0	0.128305	0.665868	0.353723	6.6671e-09	3.68979e-07	yes
gene-GIB67_026603	GIB67_026603	38818	rna-gnl|WGS:JACGCM|KingUnif26848.1	GO:0003700(DNA binding transcription factor activity);GO:0005515(protein binding);GO:0005634(nucleus);GO:0006351(transcription, DNA-templated);GO:0006355(regulation of transcription, DNA-templated);GO:0042802(identical protein binding);GO:0043565(sequence-specific DNA binding)	NA	NA	NA	trihelix transcription factor GT-3b-like [Papaver somniferum]	NA	3.45668	18.5101	40.2425	27.3054	56.2831	16.7979	0.128573	0.60478	0.937728	6.67071e-09	3.68979e-07	yes
gene-GIB67_027458	GIB67_027458	23654	rna-gnl|WGS:JACGCM|KingUnif33416.1	GO:0004497(monooxygenase activity);GO:0007275(multicellular organism development);GO:0010268(brassinosteroid homeostasis);GO:0016125(sterol metabolic process);GO:0016132(brassinosteroid biosynthetic process)	00905(Brassinosteroid biosynthesis)	K09588	EC:1.14.-.-	cytochrome P450 90A1-like isoform X1 [Durio zibethinus]	NA	15.3354	26.1482	67.9511	7.49645	2.10508	5.23603	4.00043	3.1368	2.0002	6.85784e-09	3.78342e-07	yes
gene-GIB67_030520	GIB67_030520	36753	rna-gnl|WGS:JACGCM|KingUnif09388.1	GO:0003700(DNA binding transcription factor activity);GO:0005634(nucleus);GO:0006355(regulation of transcription, DNA-templated);GO:0043565(sequence-specific DNA binding)	NA	NA	NA	hypothetical protein AQUCO_00400804v1 [Aquilegia coerulea]	NA	90.8501	116.825	50.085	5.39693	5.44428	8.83819	24.2002	58.7146	23.4686	6.92258e-09	3.80922e-07	yes
gene-GIB67_025766	GIB67_025766	40260	rna-gnl|WGS:JACGCM|KingUnif22175.1	GO:0005829(cytosol);GO:0008964(phosphoenolpyruvate carboxylase activity);GO:0009507(chloroplast);GO:0048046(apoplast);GO:0048366(leaf development)	00740(Riboflavin metabolism)	K20884	EC:2.7.1.26;EC:3.1.3.102	HAD hydrolase [Macleaya cordata]	NA	5.30006	17.2744	15.1958	0.125193	0.161018	0.117497	0.17381	4.35817	0.843547	6.97074e-09	3.82578e-07	yes
gene-GIB67_000107	GIB67_000107	26956	rna-gnl|WGS:JACGCM|KingUnif13608.1	GO:0004553(hydrolase activity, hydrolyzing O-glycosyl compounds);GO:0030247(polysaccharide binding);GO:0046658(anchored component of plasma membrane)	00500(Starch and sucrose metabolism)	K19891	EC:3.2.1.39	hypothetical protein AQUCO_09100065v1 [Aquilegia coerulea]	NA	0.515431	0.343992	0.042245	39.4407	1.19358	41.0959	4.53622	3.46869	4.35689	7.02812e-09	3.8473e-07	yes
gene-GIB67_035162	GIB67_035162	36440	rna-gnl|WGS:JACGCM|KingUnif02174.1	GO:0009507(chloroplast);GO:0009706(chloroplast inner membrane);GO:0009941(chloroplast envelope);GO:0016021(integral component of membrane)	NA	NA	NA	PREDICTED: uncharacterized protein LOC104454618 [Eucalyptus grandis]	NA	38.701	23.4679	90.987	3.27025	2.67258	7.65542	5.6342	8.39765	7.60468	7.67332e-09	4.18967e-07	yes
gene-GIB67_035861	GIB67_035861	37935	rna-gnl|WGS:JACGCM|KingUnif01638.1	GO:0016020(membrane);GO:0016709(oxidoreductase activity, acting on paired donors, with incorporation or reduction of molecular oxygen, NAD(P)H as one donor, and incorporation of one atom of oxygen);GO:0044550(secondary metabolite biosynthetic process)	NA	NA	NA	cytochrome P450 71A1-like [Papaver somniferum]	NA	13.013	4.96969	5.41532	1.27593	0.246094	1.6745	0.127551	0.266386	0.293499	7.86011e-09	4.28063e-07	yes
gene-GIB67_016316	GIB67_016316	25691	rna-gnl|WGS:JACGCM|KingUnif36441.1	GO:0003677(DNA binding);GO:0003700(DNA binding transcription factor activity);GO:0005634(nucleus);GO:0006351(transcription, DNA-templated);GO:0006355(regulation of transcription, DNA-templated);GO:0009873(ethylene-activated signaling pathway)	NA	NA	NA	AP2/ERF domain [Macleaya cordata]	NA	32.5103	418.291	475.297	48.4476	45.6619	52.2294	4.01201	20.0713	7.95249	7.98197e-09	4.33585e-07	yes
gene-GIB67_025978	GIB67_025978	38372	rna-gnl|WGS:JACGCM|KingUnif06403.1	GO:0003674(molecular_function);GO:0005737(cytoplasm);GO:0008150(biological_process)	04141(Protein processing in endoplasmic reticulum)	K13993	NA	hypothetical protein AQUCO_01200232v1 [Aquilegia coerulea]	NA	55.5348	297.859	134.53	0.721686	3.87878	1.63575	6.77753	62.0721	2.96237	8.02897e-09	4.35023e-07	yes
gene-GIB67_036173	GIB67_036173	13554	rna-gnl|WGS:JACGCM|KingUnif21625.1	GO:0005737(cytoplasm);GO:0005829(cytosol);GO:0008270(zinc ion binding);GO:0009809(lignin biosynthetic process);GO:0045551(cinnamyl-alcohol dehydrogenase activity);GO:0052747(sinapyl alcohol dehydrogenase activity);GO:0055114(oxidation-reduction process)	00940(Phenylpropanoid biosynthesis)	K00083	EC:1.1.1.195	putative cinnamyl alcohol dehydrogenase 1 [Vitis vinifera]	NA	0.603908	8.50318	4.09595	141.838	520.349	183.136	515.832	170.225	1443.65	8.19993e-09	4.43152e-07	yes
gene-GIB67_003574	GIB67_003574	23835	rna-gnl|WGS:JACGCM|KingUnif28693.1	GO:0005634(nucleus);GO:0005737(cytoplasm);GO:0008794(arsenate reductase (glutaredoxin) activity);GO:0009055(electron transfer activity);GO:0015035(protein disulfide oxidoreductase activity);GO:0045454(cell redox homeostasis);GO:0046872(metal ion binding);GO:0051537(2 iron, 2 sulfur cluster binding)	NA	NA	NA	Glutaredoxin [Macleaya cordata]	NA	0.064477	12.3732	72.9449	0.137666	0.355052	0.313879	0	0	0.185802	8.45763e-09	4.55916e-07	yes
gene-GIB67_019103	GIB67_019103	16767	rna-gnl|WGS:JACGCM|KingUnif20032.1	GO:0005515(protein binding);GO:0009507(chloroplast);GO:0009534(chloroplast thylakoid);GO:0009535(chloroplast thylakoid membrane);GO:0009579(thylakoid);GO:0009773(photosynthetic electron transport in photosystem I);GO:0015979(photosynthesis);GO:0016021(integral component of membrane);GO:0016730(oxidoreductase activity, acting on iron-sulfur proteins as donors);GO:0042802(identical protein binding)	NA	NA	NA	PREDICTED: PGR5-like protein 1A, chloroplastic [Nelumbo nucifera]	NA	11.7502	4.58735	33.3346	2.21652	0.988533	1.74981	1.50926	0.790633	1.20507	8.72751e-09	4.69045e-07	yes
gene-GIB67_024296	GIB67_024296	35869	rna-gnl|WGS:JACGCM|KingUnif27670.1	GO:0003746(translation elongation factor activity);GO:0005634(nucleus);GO:0006414(translational elongation)	NA	NA	NA	PREDICTED: uncharacterized protein LOC105801820 [Gossypium raimondii]	NA	1.30737	2.80641	3.24409	0.80443	1.20383	2.91255	0	0	0	8.74547e-09	4.69045e-07	yes
gene-GIB67_040039	GIB67_040039	18410	rna-gnl|WGS:JACGCM|KingUnif35581.1	GO:0003674(molecular_function);GO:0005634(nucleus);GO:0016021(integral component of membrane)	NA	NA	NA	PREDICTED: uncharacterized protein LOC104606327 [Nelumbo nucifera]	NA	2.00887	56.7037	81.0528	48.2909	65.35	38.1129	0.719537	1.10359	1.26284	8.79287e-09	4.69932e-07	yes
gene-GIB67_041182	GIB67_041182	34194	rna-gnl|WGS:JACGCM|KingUnif40165.1	GO:0004601(peroxidase activity);GO:0005515(protein binding);GO:0005576(extracellular region);GO:0005618(cell wall);GO:0005794(Golgi apparatus);GO:0005829(cytosol);GO:0006979(response to oxidative stress);GO:0009809(lignin biosynthetic process);GO:0010089(xylem development);GO:0020037(heme binding);GO:0042744(hydrogen peroxide catabolic process);GO:0046872(metal ion binding);GO:0048046(apoplast);G…	00940(Phenylpropanoid biosynthesis)	K00430	EC:1.11.1.7	Plant peroxidase [Macleaya cordata]	NA	2.01808	1.15786	0.369154	22.0286	38.0789	213.74	321.583	10.8429	278.505	8.80636e-09	4.69932e-07	yes
gene-GIB67_013882	GIB67_013882	36501	rna-gnl|WGS:JACGCM|KingUnif13189.1	GO:0000981(RNA polymerase II transcription factor activity, sequence-specific DNA binding);GO:0001135(transcription factor activity, RNA polymerase II transcription factor recruiting);GO:0003677(DNA binding);GO:0003700(DNA binding transcription factor activity);GO:0005515(protein binding);GO:0005634(nucleus);GO:0005737(cytoplasm);GO:0006355(regulation of transcription, DNA-templated);GO:0006357(r…	NA	NA	NA	transcription factor MYB92-like [Coffea arabica]	NA	0.098081	0.102297	0.267224	0.557729	0.598925	0.744412	5.42906	5.94343	10.0557	8.86759e-09	4.7201e-07	yes
gene-GIB67_019547	GIB67_019547	16558	rna-gnl|WGS:JACGCM|KingUnif34780.1	GO:0016020(membrane);GO:0016709(oxidoreductase activity, acting on paired donors, with incorporation or reduction of molecular oxygen, NAD(P)H as one donor, and incorporation of one atom of oxygen);GO:0044550(secondary metabolite biosynthetic process)	NA	NA	NA	PREDICTED: cytochrome P450 CYP82D47-like [Nelumbo nucifera]	NA	41.4268	4.78507	35.7549	0	0.174169	0.255301	0	1.03278	0.125748	9.00243e-09	4.77986e-07	yes
gene-GIB67_008105	GIB67_008105	24549	rna-gnl|WGS:JACGCM|KingUnif00887.1	NA	NA	NA	NA	hypothetical protein AQUCO_00100569v1 [Aquilegia coerulea]	NA	3.80215	56.582	74.2521	84.0649	75.7775	62.2129	1.40484	2.25076	0.386148	9.15948e-09	4.85109e-07	yes
gene-GIB67_014121	GIB67_014121	15233	rna-gnl|WGS:JACGCM|KingUnif14898.1	GO:0005576(extracellular region);GO:0016020(membrane);GO:0016021(integral component of membrane);GO:0046872(metal ion binding);GO:0055114(oxidation-reduction process)	NA	NA	NA	cytochrome b561 and DOMON domain-containing protein At2g04850-like [Papaver somniferum]	NA	0.004561	0	0	0.58672	0.766446	0.821428	5.40653	2.26555	0.589644	9.2055e-09	4.86331e-07	yes
gene-GIB67_017882	GIB67_017882	21683	rna-gnl|WGS:JACGCM|KingUnif06955.1	GO:0004022(alcohol dehydrogenase (NAD) activity);GO:0005829(cytosol);GO:0006561(proline biosynthetic process);GO:0009408(response to heat);GO:0009414(response to water deprivation);GO:0009688(abscisic acid biosynthetic process);GO:0009750(response to fructose);GO:0010115(regulation of abscisic acid biosynthetic process);GO:0010182(sugar mediated signaling pathway);GO:0010301(xanthoxin dehydrogena…	00904(Diterpenoid biosynthesis)	K13070	EC:1.1.1.295	Short-chain dehydrogenase/reductase SDR [Cinnamomum micranthum f. kanehirae]	NA	0	0	0	0.330715	8.71914	0.416604	0.146743	163.252	2.00979	9.50377e-09	5.00839e-07	yes
gene-GIB67_005700	GIB67_005700	10460	rna-gnl|WGS:JACGCM|KingUnif20808.1	GO:0004842(ubiquitin-protein transferase activity);GO:0005576(extracellular region);GO:0005886(plasma membrane);GO:0008270(zinc ion binding);GO:0009814(defense response, incompatible interaction);GO:0009816(defense response to bacterium, incompatible interaction);GO:0010200(response to chitin);GO:0016021(integral component of membrane);GO:0016567(protein ubiquitination);GO:0043161(proteasome-medi…	NA	NA	NA	zinc finger protein [Macleaya cordata]	NA	30.2845	36.3252	16.0879	2.28007	1.53885	1.89083	2.93195	3.329	12.5365	1.00341e-08	5.27473e-07	yes
gene-GIB67_018572	GIB67_018572	38303	rna-gnl|WGS:JACGCM|KingUnif36076.1	GO:0004601(peroxidase activity);GO:0009505(plant-type cell wall);GO:0009664(plant-type cell wall organization)	00940(Phenylpropanoid biosynthesis)	K00430	EC:1.11.1.7	hypothetical protein AQUCO_07500004v1 [Aquilegia coerulea]	NA	0	0	0	0.051818	0.503013	1.63903	2.81687	3.86602	4.28556	1.01413e-08	5.31789e-07	yes
gene-GIB67_001455	GIB67_001455	38896	rna-gnl|WGS:JACGCM|KingUnif08079.1	GO:0000981(RNA polymerase II transcription factor activity, sequence-specific DNA binding);GO:0001135(transcription factor activity, RNA polymerase II transcription factor recruiting);GO:0003677(DNA binding);GO:0003700(DNA binding transcription factor activity);GO:0005634(nucleus);GO:0006351(transcription, DNA-templated);GO:0006355(regulation of transcription, DNA-templated);GO:0006357(regulation…	NA	NA	NA	hypothetical protein AQUCO_02200293v1 [Aquilegia coerulea]	NA	0	0.175735	0	0	0	0	1.12757	12.9141	0.865235	1.03198e-08	5.39814e-07	yes
gene-GIB67_019325	GIB67_019325	28413	rna-gnl|WGS:JACGCM|KingUnif25712.1	GO:0005345(purine nucleobase transmembrane transporter activity);GO:0005515(protein binding);GO:0005887(integral component of plasma membrane);GO:0006863(purine nucleobase transport);GO:0009507(chloroplast);GO:0010184(cytokinin transport);GO:0015211(purine nucleoside transmembrane transporter activity);GO:0016021(integral component of membrane)	00010(Glycolysis / Gluconeogenesis);00030(Pentose phosphate pathway);00051(Fructose and mannose metabolism);00052(Galactose metabolism);03018(RNA degradation)	K00850	EC:2.7.1.11	hypothetical protein AQUCO_01000090v1 [Aquilegia coerulea]	NA	0.04287	0.151936	0.305156	10.4582	2.67694	26.3231	11.1896	2.27519	9.8146	1.04243e-08	5.43939e-07	yes
gene-GIB67_022180	GIB67_022180	18146	rna-gnl|WGS:JACGCM|KingUnif17770.1	GO:0004497(monooxygenase activity);GO:0044550(secondary metabolite biosynthetic process)	NA	NA	NA	hypothetical protein AQUCO_00500015v1 [Aquilegia coerulea]	NA	29.3368	10.3189	19.2905	41.2841	77.4564	98.6143	343.528	387.126	242.163	1.05093e-08	5.47027e-07	yes
gene-GIB67_012223	GIB67_012223	6049	rna-gnl|WGS:JACGCM|KingUnif37319.1	GO:0003674(molecular_function);GO:0005634(nucleus);GO:0005730(nucleolus);GO:0005737(cytoplasm);GO:0005829(cytosol);GO:0006873(cellular ion homeostasis);GO:0006970(response to osmotic stress);GO:0009414(response to water deprivation);GO:0009737(response to abscisic acid);GO:0009793(embryo development ending in seed dormancy);GO:0009845(seed germination);GO:0010226(response to lithium ion)	NA	NA	NA	Seed maturation protein [Trema orientale]	NA	0	0	0.099522	15.0523	0.879374	23.0537	0.778442	1.09245	0.173047	1.05449e-08	5.47533e-07	yes
gene-GIB67_029338	GIB67_029338	13801	rna-gnl|WGS:JACGCM|KingUnif21806.1	GO:0000977(RNA polymerase II regulatory region sequence-specific DNA binding);GO:0003677(DNA binding);GO:0003700(DNA binding transcription factor activity);GO:0005515(protein binding);GO:0005634(nucleus);GO:0006351(transcription, DNA-templated);GO:0006355(regulation of transcription, DNA-templated);GO:0009585(red, far-red light phototransduction);GO:0010224(response to UV-B);GO:0080167(response t…	04712(Circadian rhythm - plant)	K16241	NA	Basic-leucine zipper domain [Macleaya cordata]	NA	6.31702	0.584944	29.5291	0.268903	0.09737	0.416727	0.166981	0.112115	0	1.1231e-08	5.81731e-07	yes
gene-GIB67_017614	GIB67_017614	33206	rna-gnl|WGS:JACGCM|KingUnif03705.1	GO:0003674(molecular_function);GO:0005634(nucleus);GO:0009409(response to cold);GO:0010228(vegetative to reproductive phase transition of meristem);GO:0042752(regulation of circadian rhythm);GO:0080167(response to karrikin)	NA	NA	NA	hypothetical protein AQUCO_01500057v1 [Aquilegia coerulea]	NA	44.313	27.7699	59.8842	22.3782	11.6609	13.2437	2.36149	4.15529	3.9546	1.18095e-08	6.10204e-07	yes
gene-GIB67_012521	GIB67_012521	24299	rna-gnl|WGS:JACGCM|KingUnif08052.1	GO:0003779(actin binding);GO:0005737(cytoplasm);GO:0005739(mitochondrion)	NA	NA	NA	hypothetical protein AQUCO_00201444v1 [Aquilegia coerulea]	NA	0	0	0	4.42627	0.062701	9.3635	0.648672	0.139552	0.442004	1.20006e-08	6.18569e-07	yes
gene-GIB67_006988	GIB67_006988	4653	rna-gnl|WGS:JACGCM|KingUnif26022.1	GO:0005634(nucleus);GO:0005829(cytosol);GO:0009691(cytokinin biosynthetic process);GO:0016799(hydrolase activity, hydrolyzing N-glycosyl compounds)	NA	NA	NA	PREDICTED: cytokinin riboside 5'-monophosphate phosphoribohydrolase LOG5-like [Nelumbo nucifera]	NA	23.7512	86.2462	82.5764	8.32064	3.17152	15.1246	0.106321	3.00198	0.58687	1.21216e-08	6.2329e-07	yes
gene-GIB67_013919	GIB67_013919	36536	rna-gnl|WGS:JACGCM|KingUnif06636.1	GO:0003677(DNA binding);GO:0005634(nucleus);GO:0008150(biological_process)	NA	NA	NA	hypothetical protein AQUCO_01000207v1 [Aquilegia coerulea]	NA	0	0	0	1.70568	0.097603	11.0766	0	0	0	1.24705e-08	6.39678e-07	yes
gene-GIB67_037513	GIB67_037513	12794	rna-gnl|WGS:JACGCM|KingUnif00047.1	GO:0005737(cytoplasm);GO:0030001(metal ion transport);GO:0046914(transition metal ion binding);GO:0046916(cellular transition metal ion homeostasis)	03013(RNA transport)	K14292	EC:2.1.1.-	PREDICTED: protein SODIUM POTASSIUM ROOT DEFECTIVE 2-like [Nelumbo nucifera]	NA	12.6215	65.7348	39.8381	1.1872	2.03301	3.03632	3.80308	11.1896	2.07715	1.26278e-08	6.44919e-07	yes
gene-GIB67_000400	GIB67_000400	20278	rna-gnl|WGS:JACGCM|KingUnif39292.1	GO:0019745(pentacyclic triterpenoid biosynthetic process);GO:0042300(beta-amyrin synthase activity)	00909(Sesquiterpenoid and triterpenoid biosynthesis)	K15813	EC:5.4.99.39	hypothetical protein BVC80_521g128 [Macleaya cordata]	NA	0.20822	0	0.161393	5.9924	13.5394	167.404	97.6934	36.6544	13.3749	1.26335e-08	6.44919e-07	yes
gene-GIB67_033329	GIB67_033329	31093	rna-gnl|WGS:JACGCM|KingUnif02512.1	GO:0005515(protein binding);GO:0009409(response to cold);GO:0009507(chloroplast);GO:0009522(photosystem I);GO:0009534(chloroplast thylakoid);GO:0009535(chloroplast thylakoid membrane);GO:0009579(thylakoid);GO:0009644(response to high light intensity);GO:0009645(response to low light intensity stimulus);GO:0009735(response to cytokinin);GO:0009768(photosynthesis, light harvesting in photosystem I)…	00196(Photosynthesis - antenna proteins)	K08909	NA	PREDICTED: photosystem I chlorophyll a/b-binding protein 3-1, chloroplastic [Malus domestica]	NA	95.1006	36.9179	89.9529	20.5874	3.28237	16.1151	5.35467	2.85282	6.76982	1.27131e-08	6.47419e-07	yes
gene-GIB67_023409	GIB67_023409	34960	rna-gnl|WGS:JACGCM|KingUnif32539.1	GO:0005576(extracellular region);GO:0030246(carbohydrate binding)	NA	NA	NA	hypothetical protein AQUCO_00700319v1 [Aquilegia coerulea]	NA	42.3498	4.90387	38.1304	0	0.293149	0.246149	0.032808	0.065193	1.56815	1.27453e-08	6.47502e-07	yes
gene-GIB67_004331	GIB67_004331	19726	rna-gnl|WGS:JACGCM|KingUnif07178.1	GO:0005887(integral component of plasma membrane);GO:0008509(anion transmembrane transporter activity);GO:0051453(regulation of intracellular pH);GO:0098656(anion transmembrane transport)	NA	NA	NA	hypothetical protein AQUCO_02500357v1 [Aquilegia coerulea]	NA	2.25616	2.93032	2.07108	7.20253	29.9764	98.3253	179.413	44.5741	101.086	1.34681e-08	6.82588e-07	yes
gene-GIB67_041902	GIB67_041902	15108	rna-gnl|WGS:JACGCM|KingUnif04172.1	GO:0030599(pectinesterase activity);GO:0046910(pectinesterase inhibitor activity);GO:0071944(cell periphery)	00040(Pentose and glucuronate interconversions)	K01051	EC:3.1.1.11	PREDICTED: pectinesterase [Nelumbo nucifera]	NA	8.6788	1.42899	0.556025	25.1406	66.8559	96.466	271.812	94.1873	204.475	1.38677e-08	7.01164e-07	yes
gene-GIB67_013752	GIB67_013752	8012	rna-gnl|WGS:JACGCM|KingUnif19621.1	GO:0003674(molecular_function);GO:0005634(nucleus);GO:0005886(plasma membrane);GO:0008150(biological_process)	NA	NA	NA	hypothetical protein BVC80_1289g42 [Macleaya cordata]	NA	109.672	86.1477	170	21.8689	17.9491	28.7536	21.9901	18.5476	19.0867	1.39201e-08	7.02137e-07	yes
gene-GIB67_033467	GIB67_033467	24279	rna-gnl|WGS:JACGCM|KingUnif30226.1	GO:0004497(monooxygenase activity);GO:0007275(multicellular organism development);GO:0010268(brassinosteroid homeostasis);GO:0016125(sterol metabolic process);GO:0016132(brassinosteroid biosynthetic process)	NA	NA	NA	hypothetical protein AQUCO_04500214v1 [Aquilegia coerulea]	NA	1.17589	1.31868	1.36545	10.7194	11.2206	109.703	83.4246	26.0822	34.1797	1.42511e-08	7.17127e-07	yes
gene-GIB67_037397	GIB67_037397	25997	rna-gnl|WGS:JACGCM|KingUnif10577.1	GO:0003755(peptidyl-prolyl cis-trans isomerase activity)	NA	NA	NA	hypothetical protein EUTSA_v10027585mg, partial [Eutrema salsugineum]	NA	1.04398	1.56643	1.21316	1.99012	4.00622	3.0692	21.5134	19.855	18.6536	1.45819e-08	7.3203e-07	yes
gene-GIB67_036072	GIB67_036072	13452	rna-gnl|WGS:JACGCM|KingUnif37410.1	GO:0005737(cytoplasm);GO:0008270(zinc ion binding);GO:0009735(response to cytokinin);GO:0009809(lignin biosynthetic process);GO:0045551(cinnamyl-alcohol dehydrogenase activity);GO:0048046(apoplast);GO:0052747(sinapyl alcohol dehydrogenase activity);GO:0055114(oxidation-reduction process)	00940(Phenylpropanoid biosynthesis)	K00083	EC:1.1.1.195	hypothetical protein AQUCO_02600015v1 [Aquilegia coerulea]	NA	0.362686	0.558143	0.580181	26.0322	26.0518	15.6277	3.59778	14.295	0.88172	1.47994e-08	7.41197e-07	yes
gene-GIB67_015759	GIB67_015759	6456	rna-gnl|WGS:JACGCM|KingUnif19086.1	GO:0003677(DNA binding);GO:0005515(protein binding);GO:0005634(nucleus);GO:0006351(transcription, DNA-templated);GO:0006355(regulation of transcription, DNA-templated);GO:0010167(response to nitrate);GO:0015706(nitrate transport);GO:0071249(cellular response to nitrate);GO:0071705(nitrogen compound transport);GO:1901698(response to nitrogen compound)	03050(Proteasome)	K03029	NA	hypothetical protein AQUCO_00600246v1 [Aquilegia coerulea]	NA	0.018414	0	0	18.3568	0	16.2925	0.334618	0.389976	0.333615	1.48394e-08	7.41447e-07	yes
gene-GIB67_042925	GIB67_042925	3458	rna-gnl|WGS:JACGCM|KingUnif21410.1	GO:0003954(NADH dehydrogenase activity);GO:0005768(endosome);GO:0005794(Golgi apparatus);GO:0005802(trans-Golgi network);GO:0005886(plasma membrane);GO:0016021(integral component of membrane);GO:0051536(iron-sulfur cluster binding)	NA	NA	NA	PREDICTED: CASP-like protein 1D1 [Nelumbo nucifera]	NA	20.864	24.3464	58.2727	1.71702	1.77567	2.58222	17.2029	10.1817	7.3859	1.50057e-08	7.4799e-07	yes
gene-GIB67_035967	GIB67_035967	16379	rna-gnl|WGS:JACGCM|KingUnif31371.1	GO:0003674(molecular_function);GO:0008150(biological_process);GO:0009507(chloroplast)	NA	NA	NA	Protein of unknown function DUF3067 [Macleaya cordata]	NA	1.06789	0.545748	6.72116	0.478157	0.307993	0.351077	0	0	0	1.52817e-08	7.58927e-07	yes
gene-GIB67_005645	GIB67_005645	10407	rna-gnl|WGS:JACGCM|KingUnif11384.1	GO:0005524(ATP binding);GO:0005975(carbohydrate metabolic process);GO:0009507(chloroplast);GO:0009941(chloroplast envelope);GO:0016310(phosphorylation);GO:0046872(metal ion binding);GO:0050521(alpha-glucan, water dikinase activity)	NA	NA	NA	Pyruvate phosphate dikinase [Macleaya cordata]	NA	8.30174	11.6597	26.8302	0.74162	0.986141	1.84997	0.966285	3.97443	1.42511	1.52968e-08	7.58927e-07	yes
gene-GIB67_036291	GIB67_036291	39788	rna-gnl|WGS:JACGCM|KingUnif42972.1	GO:0008150(biological_process);GO:0009507(chloroplast);GO:0016787(hydrolase activity)	NA	NA	NA	TRNA-dihydrouridine synthase [Actinidia chinensis var. chinensis]	NA	12.0684	0.867349	65.0955	1.87001	0.090073	1.20339	0.322801	0.428077	0.165219	1.53579e-08	7.60182e-07	yes
gene-GIB67_038075	GIB67_038075	15275	rna-gnl|WGS:JACGCM|KingUnif00905.1	GO:0005515(protein binding);GO:0009409(response to cold);GO:0009507(chloroplast);GO:0009522(photosystem I);GO:0009534(chloroplast thylakoid);GO:0009535(chloroplast thylakoid membrane);GO:0009579(thylakoid);GO:0009644(response to high light intensity);GO:0009645(response to low light intensity stimulus);GO:0009735(response to cytokinin);GO:0009768(photosynthesis, light harvesting in photosystem I)…	00196(Photosynthesis - antenna proteins)	K08909	NA	PREDICTED: photosystem I chlorophyll a/b-binding protein 3-1, chloroplastic [Malus domestica]	NA	91.5686	35.4379	86.6959	19.8084	3.05299	15.4447	5.07978	2.71595	6.57906	1.56389e-08	7.72287e-07	yes
gene-GIB67_006686	GIB67_006686	37467	rna-gnl|WGS:JACGCM|KingUnif42001.1	GO:0005886(plasma membrane);GO:0015079(potassium ion transmembrane transporter activity)	NA	NA	NA	potassium transporter [Macleaya cordata]	NA	0.215517	0	0	0	0	0.086472	5.93658	5.35981	8.11353	1.59262e-08	7.84642e-07	yes
gene-GIB67_030485	GIB67_030485	1940	rna-gnl|WGS:JACGCM|KingUnif00408.1	NA	NA	NA	NA	uncharacterized protein LOC110025752 isoform X2 [Phalaenopsis equestris]	NA	3.92745	1.20358	1.769	7.21431	2.8563	2.78918	0	0	0	1.64225e-08	8.07217e-07	yes
gene-GIB67_012466	GIB67_012466	18330	rna-gnl|WGS:JACGCM|KingUnif08304.1	GO:0046658(anchored component of plasma membrane)	NA	NA	NA	hypothetical protein AQUCO_05300036v1 [Aquilegia coerulea]	NA	0.142069	0	0.130193	1.06223	3.26053	3.32869	5.83456	10.3712	9.83956	1.7113e-08	8.39212e-07	yes
gene-GIB67_012969	GIB67_012969	11521	rna-gnl|WGS:JACGCM|KingUnif28580.1	GO:0003674(molecular_function);GO:0005634(nucleus);GO:0008150(biological_process)	NA	NA	NA	hypothetical protein BVC80_1707g60 [Macleaya cordata]	NA	0	0	0	0.468043	0.715131	0.335352	1.36627	1.54061	0.979689	1.75182e-08	8.57097e-07	yes
gene-GIB67_030488	GIB67_030488	1945	rna-gnl|WGS:JACGCM|KingUnif11028.1	GO:0003674(molecular_function);GO:0005739(mitochondrion);GO:0009793(embryo development ending in seed dormancy)	NA	NA	NA	hypothetical protein AQUCO_09100037v1 [Aquilegia coerulea]	NA	0.238484	0.706016	1.73018	1.53183	1.57969	1.43768	0	0	0	1.83478e-08	8.95617e-07	yes
gene-GIB67_005511	GIB67_005511	10623	rna-gnl|WGS:JACGCM|KingUnif37235.1	GO:0008253(5'-nucleotidase activity)	NA	NA	NA	HAD-superfamily hydrolase [Macleaya cordata]	NA	23.7568	32.9344	37.6202	6.5897	3.51239	6.29092	6.82072	6.03804	3.72659	1.86771e-08	9.09595e-07	yes
gene-GIB67_008784	GIB67_008784	2502	rna-gnl|WGS:JACGCM|KingUnif09095.1	GO:0003677(DNA binding);GO:0003700(DNA binding transcription factor activity);GO:0005515(protein binding);GO:0005634(nucleus);GO:0007275(multicellular organism development);GO:0009909(regulation of flower development);GO:0009933(meristem structural organization);GO:0009944(polarity specification of adaxial/abaxial axis);GO:0010093(specification of floral organ identity);GO:0010154(fruit developme…	NA	NA	NA	PREDICTED: protein YABBY 4-like [Nelumbo nucifera]	NA	1.28663	0.582077	0	46.9291	0.154614	110.776	0.244478	0.090367	0.357602	1.8932e-08	9.19893e-07	yes
gene-GIB67_019538	GIB67_019538	16543	rna-gnl|WGS:JACGCM|KingUnif42390.1	GO:0016020(membrane);GO:0016709(oxidoreductase activity, acting on paired donors, with incorporation or reduction of molecular oxygen, NAD(P)H as one donor, and incorporation of one atom of oxygen);GO:0044550(secondary metabolite biosynthetic process)	NA	NA	NA	PREDICTED: cytochrome P450 CYP82D47-like [Nelumbo nucifera]	NA	6.48226	24.0514	7.8701	0.627551	0.044642	0.554026	0.753627	1.77977	0.297211	1.90539e-08	9.23698e-07	yes
gene-GIB67_019615	GIB67_019615	16629	rna-gnl|WGS:JACGCM|KingUnif23523.1	GO:0004190(aspartic-type endopeptidase activity);GO:0006508(proteolysis);GO:0030163(protein catabolic process)	NA	NA	NA	hypothetical protein AQUCO_00700563v1 [Aquilegia coerulea]	NA	0.211091	0.011724	0	20.4996	1.03792	23.5578	0.676174	0.017338	0.663973	1.91315e-08	9.25343e-07	yes
gene-GIB67_006292	GIB67_006292	2590	rna-gnl|WGS:JACGCM|KingUnif24405.1	GO:0005576(extracellular region);GO:0005618(cell wall);GO:0005886(plasma membrane);GO:0006952(defense response);GO:0009505(plant-type cell wall);GO:0030414(peptidase inhibitor activity);GO:0031640(killing of cells of other organism);GO:0050832(defense response to fungus)	NA	NA	NA	putative gamma-thionin [Castanea sativa]	NA	1.25534	0	0	879.054	5.768	931.657	51.9553	2.93761	70.8804	1.94315e-08	9.37716e-07	yes
gene-GIB67_007737	GIB67_007737	16144	rna-gnl|WGS:JACGCM|KingUnif10274.1	GO:0003674(molecular_function);GO:0005576(extracellular region);GO:0008150(biological_process);GO:0016021(integral component of membrane)	NA	NA	NA	Glyoxal oxidase [Macleaya cordata]	NA	49.1016	18.7939	13.1902	7.84282	3.17929	21.017	242.17	124.99	178.501	2.00236e-08	9.64093e-07	yes
gene-GIB67_008685	GIB67_008685	27296	rna-gnl|WGS:JACGCM|KingUnif31144.1	GO:0004564(beta-fructofuranosidase activity);GO:0004575(sucrose alpha-glucosidase activity);GO:0005634(nucleus);GO:0005829(cytosol);GO:0005975(carbohydrate metabolic process);GO:0033926(glycopeptide alpha-N-acetylgalactosaminidase activity)	03010(Ribosome)	K02986	NA	probable alkaline/neutral invertase B [Quercus suber]	NA	4.93808	1.67182	1.40787	4.15413	2.58126	2.48199	0	0.037737	0	2.04778e-08	9.83722e-07	yes
gene-GIB67_013869	GIB67_013869	36491	rna-gnl|WGS:JACGCM|KingUnif39532.1	GO:0004197(cysteine-type endopeptidase activity);GO:0005515(protein binding);GO:0006508(proteolysis);GO:0006952(defense response);GO:0043068(positive regulation of programmed cell death)	NA	NA	NA	hypothetical protein AQUCO_01900102v1 [Aquilegia coerulea]	NA	8.93029	26.255	39.8401	0.340959	2.45536	3.07545	2.06559	2.20769	1.42622	2.05569e-08	9.85291e-07	yes
gene-GIB67_025389	GIB67_025389	12759	rna-gnl|WGS:JACGCM|KingUnif26281.1	GO:0004674(protein serine/threonine kinase activity);GO:0005634(nucleus);GO:0005737(cytoplasm);GO:0005886(plasma membrane);GO:0035556(intracellular signal transduction)	NA	NA	NA	hypothetical protein AQUCO_00100798v1 [Aquilegia coerulea]	NA	0.071123	0	0	22.7061	0.064729	19.9984	0.594424	0.977511	0.113516	2.09314e-08	1.00097e-06	yes
gene-GIB67_010031	GIB67_010031	42935	rna-gnl|WGS:JACGCM|KingUnif33247.1	GO:0005432(calcium:sodium antiporter activity);GO:0006812(cation transport);GO:0006813(potassium ion transport);GO:0006814(sodium ion transport);GO:0015297(antiporter activity);GO:0015491(cation:cation antiporter activity);GO:0016021(integral component of membrane);GO:0055085(transmembrane transport)	NA	NA	NA	hypothetical protein AQUCO_00900546v1 [Aquilegia coerulea]	NA	17.5781	341.446	260.067	104.557	116.951	149.716	4.50969	6.78722	3.852	2.17938e-08	1.03987e-06	yes
gene-GIB67_028330	GIB67_028330	22695	rna-gnl|WGS:JACGCM|KingUnif16708.1	GO:0005886(plasma membrane);GO:0006952(defense response)	NA	NA	NA	hypothetical protein AQUCO_00700931v1 [Aquilegia coerulea]	NA	0	0	0	0	0	0	2.09741	2.60872	3.98557	2.21813e-08	1.05598e-06	yes
gene-GIB67_020236	GIB67_020236	3081	rna-gnl|WGS:JACGCM|KingUnif12363.1	GO:0004601(peroxidase activity);GO:0005515(protein binding);GO:0005576(extracellular region);GO:0005618(cell wall);GO:0005794(Golgi apparatus);GO:0005829(cytosol);GO:0006979(response to oxidative stress);GO:0009809(lignin biosynthetic process);GO:0010089(xylem development);GO:0020037(heme binding);GO:0042744(hydrogen peroxide catabolic process);GO:0046872(metal ion binding);GO:0048046(apoplast);G…	00940(Phenylpropanoid biosynthesis)	K00430	EC:1.11.1.7	Peroxidase 68 [Cinnamomum micranthum f. kanehirae]	NA	1.52273	0.531131	0.641457	138.521	68.5339	24.8517	44.057	1.37818	51.431	2.25317e-08	1.07026e-06	yes
gene-GIB67_015795	GIB67_015795	6494	rna-gnl|WGS:JACGCM|KingUnif04509.1	GO:0000325(plant-type vacuole);GO:0004674(protein serine/threonine kinase activity);GO:0005515(protein binding);GO:0005524(ATP binding);GO:0005886(plasma membrane);GO:0006468(protein phosphorylation);GO:0007169(transmembrane receptor protein tyrosine kinase signaling pathway);GO:0007172(signal complex assembly);GO:0009506(plasmodesma);GO:0009934(regulation of meristem structural organization);GO:…	NA	NA	NA	hypothetical protein CUMW_070420 [Citrus unshiu]	NA	18.6163	35.7694	37.0767	5.31098	2.34647	7.78593	4.39524	3.20489	4.73721	2.2916e-08	1.08517e-06	yes
gene-GIB67_003573	GIB67_003573	23836	rna-gnl|WGS:JACGCM|KingUnif18869.1	GO:0005634(nucleus);GO:0005737(cytoplasm);GO:0008794(arsenate reductase (glutaredoxin) activity);GO:0009055(electron transfer activity);GO:0015035(protein disulfide oxidoreductase activity);GO:0045454(cell redox homeostasis);GO:0046872(metal ion binding);GO:0051537(2 iron, 2 sulfur cluster binding)	NA	NA	NA	Glutaredoxin [Macleaya cordata]	NA	0	5.94105	44.811	0	0	0	0	0.109358	0	2.29482e-08	1.08517e-06	yes
gene-GIB67_001654	GIB67_001654	41024	rna-gnl|WGS:JACGCM|KingUnif39347.1	GO:0003677(DNA binding);GO:0003700(DNA binding transcription factor activity);GO:0005634(nucleus);GO:0006351(transcription, DNA-templated);GO:0006355(regulation of transcription, DNA-templated);GO:0046983(protein dimerization activity)	NA	NA	NA	transcription factor bHLH94 isoform X1 [Cinnamomum micranthum f. kanehirae]	NA	0.178822	0.183998	0.20157	12.2078	2.36929	9.7674	0	0.561834	0.080424	2.33588e-08	1.10213e-06	yes
gene-GIB67_014004	GIB67_014004	39290	rna-gnl|WGS:JACGCM|KingUnif34327.1	GO:0004568(chitinase activity);GO:0005576(extracellular region);GO:0006032(chitin catabolic process);GO:0008061(chitin binding)	00520(Amino sugar and nucleotide sugar metabolism)	K01183	EC:3.2.1.14	hypothetical protein AQUCO_01900180v1 [Aquilegia coerulea]	NA	0.143842	0.223738	0.906457	0.965033	2.39821	2.21765	10.1426	12.4782	10.6161	2.38597e-08	1.12326e-06	yes
gene-GIB67_000771	GIB67_000771	12144	rna-gnl|WGS:JACGCM|KingUnif37509.1	GO:0003723(RNA binding);GO:0004519(endonuclease activity);GO:0005515(protein binding);GO:0005524(ATP binding);GO:0005739(mitochondrion);GO:0006349(regulation of gene expression by genetic imprinting);GO:0009451(RNA modification);GO:0009507(chloroplast);GO:0009793(embryo development ending in seed dormancy);GO:0009960(endosperm development)	NA	NA	NA	hypothetical protein VITISV_040755 [Vitis vinifera]	NA	0.066436	7.0063	4.12103	5.1058	2.63299	4.80591	0	0	0	2.50388e-08	1.17382e-06	yes
gene-GIB67_016504	GIB67_016504	26195	rna-gnl|WGS:JACGCM|KingUnif40070.1	GO:0005634(nucleus)	NA	NA	NA	Myc-type [Macleaya cordata]	NA	0	0	0	4.51041	0.556191	5.4992	1.8076	0.239666	1.19766	2.50444e-08	1.17382e-06	yes
gene-GIB67_008330	GIB67_008330	14946	rna-gnl|WGS:JACGCM|KingUnif40585.1	GO:0005345(purine nucleobase transmembrane transporter activity);GO:0006863(purine nucleobase transport);GO:0009507(chloroplast);GO:0016020(membrane);GO:0016021(integral component of membrane)	00010(Glycolysis / Gluconeogenesis);00030(Pentose phosphate pathway);00051(Fructose and mannose metabolism);00052(Galactose metabolism);03018(RNA degradation)	K00850	EC:2.7.1.11	hypothetical protein AQUCO_01000091v1 [Aquilegia coerulea]	NA	9.5184	57.8223	70.997	0.874927	0.77674	6.1293	0.549083	3.55681	0.646807	2.56251e-08	1.19839e-06	yes
gene-GIB67_019545	GIB67_019545	16551	rna-gnl|WGS:JACGCM|KingUnif00884.1	GO:0005216(ion channel activity);GO:0005886(plasma membrane);GO:0006811(ion transport);GO:0009507(chloroplast);GO:0009526(plastid envelope);GO:0009657(plastid organization);GO:0010020(chloroplast fission);GO:0016020(membrane);GO:0016021(integral component of membrane);GO:0031969(chloroplast membrane);GO:0055085(transmembrane transport)	NA	NA	NA	Mechanosensitive ion channel MscS [Macleaya cordata]	NA	16.3662	8.95982	70.8295	4.52573	1.4733	4.86535	1.64172	2.70052	2.65575	2.57069e-08	1.19956e-06	yes
gene-GIB67_016878	GIB67_016878	27730	rna-gnl|WGS:JACGCM|KingUnif43030.1	GO:0009699(phenylpropanoid biosynthetic process);GO:0042349(guiding stereospecific synthesis activity)	00970(Aminoacyl-tRNA biosynthesis)	K01870	EC:6.1.1.5	PREDICTED: dirigent protein 22-like [Nelumbo nucifera]	NA	0.125791	0	0	0.442079	0.202274	1.58234	4.48556	7.3919	12.7458	2.68888e-08	1.25196e-06	yes
gene-GIB67_043210	GIB67_043210	9929	rna-gnl|WGS:JACGCM|KingUnif39411.1	GO:0019745(pentacyclic triterpenoid biosynthetic process);GO:0042300(beta-amyrin synthase activity)	00909(Sesquiterpenoid and triterpenoid biosynthesis)	K15813	EC:5.4.99.39	hypothetical protein BVC80_521g128 [Macleaya cordata]	NA	0.026263	0	0	1.09327	0.454405	6.27146	1.30768	2.71204	2.00783	2.72375e-08	1.26541e-06	yes
gene-GIB67_004087	GIB67_004087	7497	rna-gnl|WGS:JACGCM|KingUnif27972.1	GO:0005618(cell wall);GO:0033609(oxalate metabolic process);GO:0046564(oxalate decarboxylase activity)	NA	NA	NA	PREDICTED: germin-like protein subfamily T member 2 [Cucumis melo]	NA	0.127332	0.205992	0.762848	6.41771	39.8088	16.6961	2.97922	9.9116	6.03139	2.79131e-08	1.29396e-06	yes
gene-GIB67_032454	GIB67_032454	38530	rna-gnl|WGS:JACGCM|KingUnif12643.1	GO:0006508(proteolysis);GO:0008233(peptidase activity);GO:0009507(chloroplast);GO:0016021(integral component of membrane)	NA	NA	NA	CAAX amino terminal protease [Trema orientale]	NA	83.9902	24.3701	137.091	19.3083	6.40408	9.33804	4.76611	4.84311	6.32929	2.84782e-08	1.31727e-06	yes
gene-GIB67_013474	GIB67_013474	32219	rna-gnl|WGS:JACGCM|KingUnif13616.1	GO:0005886(plasma membrane);GO:0009416(response to light stimulus);GO:0016567(protein ubiquitination)	03050(Proteasome)	K03063	NA	PREDICTED: BTB/POZ domain-containing protein At5g47800-like [Nelumbo nucifera]	NA	5.88538	15.6524	9.96622	0.662769	0.907498	1.58421	1.2281	1.41094	0.479589	2.92367e-08	1.34941e-06	yes
gene-GIB67_023073	GIB67_023073	1635	rna-gnl|WGS:JACGCM|KingUnif08823.1	GO:0005515(protein binding);GO:0005886(plasma membrane);GO:0007275(multicellular organism development);GO:0009507(chloroplast);GO:0009860(pollen tube growth);GO:0010215(cellulose microfibril organization);GO:0016324(apical plasma membrane);GO:0017157(regulation of exocytosis);GO:0030833(regulation of actin filament polymerization);GO:0040008(regulation of growth);GO:0051650(establishment of vesic…	NA	NA	NA	hypothetical protein AQUCO_05800120v1, partial [Aquilegia coerulea]	NA	0	0	0	3.21828	0.30279	7.81642	4.82432	3.63217	1.63571	2.97299e-08	1.36919e-06	yes
gene-GIB67_036644	GIB67_036644	30030	rna-gnl|WGS:JACGCM|KingUnif28468.1	GO:0004864(protein phosphatase inhibitor activity);GO:0005634(nucleus);GO:0005737(cytoplasm);GO:0009738(abscisic acid-activated signaling pathway);GO:0010427(abscisic acid binding);GO:0080163(regulation of protein serine/threonine phosphatase activity)	04016(MAPK signaling pathway - plant);04075(Plant hormone signal transduction)	K14496	NA	PREDICTED: abscisic acid receptor PYL4-like [Gossypium raimondii]	NA	4.39393	41.4333	77.6653	0.595181	0.534009	3.50769	1.49848	3.19758	1.80104	3.00026e-08	1.37875e-06	yes
gene-GIB67_012716	GIB67_012716	11271	rna-gnl|WGS:JACGCM|KingUnif38584.1	GO:0004022(alcohol dehydrogenase (NAD) activity);GO:0005829(cytosol);GO:0006561(proline biosynthetic process);GO:0009408(response to heat);GO:0009414(response to water deprivation);GO:0009688(abscisic acid biosynthetic process);GO:0009750(response to fructose);GO:0010115(regulation of abscisic acid biosynthetic process);GO:0010182(sugar mediated signaling pathway);GO:0010301(xanthoxin dehydrogena…	00904(Diterpenoid biosynthesis)	K13070	EC:1.1.1.295	PREDICTED: secoisolariciresinol dehydrogenase-like [Nelumbo nucifera]	NA	0.468306	0.140568	0.078586	1.99449	3.26843	5.18165	31.7522	4.19117	8.79159	3.02798e-08	1.38848e-06	yes
gene-GIB67_020406	GIB67_020406	5840	rna-gnl|WGS:JACGCM|KingUnif36063.1	GO:0004190(aspartic-type endopeptidase activity);GO:0006508(proteolysis);GO:0030163(protein catabolic process)	NA	NA	NA	Basic 7S globulin [Vitis vinifera]	NA	0.553405	0.356971	0.493228	25.2257	1.24206	25.3914	27.711	8.16315	34.8807	3.05304e-08	1.39695e-06	yes
gene-GIB67_006699	GIB67_006699	29397	rna-gnl|WGS:JACGCM|KingUnif16018.1	GO:0004674(protein serine/threonine kinase activity);GO:0005886(plasma membrane);GO:0006468(protein phosphorylation)	NA	NA	NA	putative receptor-like protein kinase [Cinnamomum micranthum f. kanehirae]	NA	0	0	0	0.17134	0.029562	1.01776	1.65868	3.27357	1.62106	3.18036e-08	1.45207e-06	yes
gene-GIB67_030903	GIB67_030903	40148	rna-gnl|WGS:JACGCM|KingUnif19197.1	NA	NA	NA	NA		NA	1.00929	2.22105	3.39905	3.46516	2.53973	2.04345	0	0	0	3.33127e-08	1.5177e-06	yes
gene-GIB67_037852	GIB67_037852	35141	rna-gnl|WGS:JACGCM|KingUnif06391.1	GO:0003674(molecular_function);GO:0005576(extracellular region);GO:0008150(biological_process)	NA	NA	NA	non-classical arabinogalactan protein 31-like [Quercus suber]	NA	0.126153	0	0	2.4511	3.85974	84.9574	8.36249	1.07161	7.81938	3.49319e-08	1.58805e-06	yes
gene-GIB67_036830	GIB67_036830	30218	rna-gnl|WGS:JACGCM|KingUnif28339.1	GO:0004742(dihydrolipoyllysine-residue acetyltransferase activity);GO:0005739(mitochondrion);GO:0005829(cytosol);GO:0006086(acetyl-CoA biosynthetic process from pyruvate);GO:0006096(glycolytic process);GO:0009507(chloroplast);GO:0009534(chloroplast thylakoid);GO:0009570(chloroplast stroma);GO:0009941(chloroplast envelope);GO:0016020(membrane);GO:0022626(cytosolic ribosome)	00010(Glycolysis / Gluconeogenesis);00020(Citrate cycle (TCA cycle));00620(Pyruvate metabolism)	K00627	EC:2.3.1.12	Dihydrolipoyllysine-residue acetyltransferase component 4 of pyruvate dehydrogenase [Actinidia chinensis var. chinensis]	NA	5.11341	4.33934	7.43892	45.6469	30.7508	50.6494	44.0724	34.4378	37.7592	3.51034e-08	1.59243e-06	yes
gene-GIB67_041119	GIB67_041119	34129	rna-gnl|WGS:JACGCM|KingUnif00056.1	GO:0003674(molecular_function);GO:0005634(nucleus);GO:0008150(biological_process)	NA	NA	NA	hypothetical protein BVC80_1837g83 [Macleaya cordata]	NA	0	0	0.041292	7.55269	0.098224	5.23619	0.162299	0.279878	0.332655	3.54569e-08	1.60503e-06	yes
gene-GIB67_007345	GIB67_007345	5460	rna-gnl|WGS:JACGCM|KingUnif42073.1	GO:0003677(DNA binding);GO:0003700(DNA binding transcription factor activity);GO:0005634(nucleus);GO:0006351(transcription, DNA-templated);GO:0006355(regulation of transcription, DNA-templated);GO:0007275(multicellular organism development)	03013(RNA transport);03015(mRNA surveillance pathway);03018(RNA degradation)	K13126	NA	NAC domain [Macleaya cordata]	NA	0.468599	95.2097	85.702	0.576671	0.114048	0.89405	0.390192	5.04957	0.793383	3.55611e-08	1.60632e-06	yes
gene-GIB67_043188	GIB67_043188	9895	rna-gnl|WGS:JACGCM|KingUnif33186.1	GO:0000502(proteasome complex);GO:0004298(threonine-type endopeptidase activity);GO:0005634(nucleus);GO:0005737(cytoplasm);GO:0005773(vacuole);GO:0005774(vacuolar membrane);GO:0005829(cytosol);GO:0005839(proteasome core complex);GO:0006511(ubiquitin-dependent protein catabolic process);GO:0008233(peptidase activity);GO:0009651(response to salt stress);GO:0010043(response to zinc ion);GO:0010363(r…	03050(Proteasome)	K02738	EC:3.4.25.1	PREDICTED: proteasome subunit beta type-6 [Musa acuminata subsp. malaccensis]	NA	31.9888	21.5136	20.7357	0	0	0.902525	0.347349	0.511447	0	3.80638e-08	1.71571e-06	yes
gene-GIB67_038041	GIB67_038041	24773	rna-gnl|WGS:JACGCM|KingUnif16136.1	GO:0000325(plant-type vacuole);GO:0004553(hydrolase activity, hydrolyzing O-glycosyl compounds);GO:0004575(sucrose alpha-glucosidase activity);GO:0005773(vacuole);GO:0005775(vacuolar lumen);GO:0005975(carbohydrate metabolic process);GO:0005985(sucrose metabolic process);GO:0009617(response to bacterium);GO:0009738(abscisic acid-activated signaling pathway);GO:0016021(integral component of membran…	00052(Galactose metabolism);00500(Starch and sucrose metabolism)	K01193	EC:3.2.1.26	Glycoside hydrolase [Macleaya cordata]	NA	24.8034	8.4107	29.8799	1.1772	0.253787	4.26561	1.35568	1.14109	0.354827	3.85762e-08	1.73511e-06	yes
gene-GIB67_009315	GIB67_009315	15642	rna-gnl|WGS:JACGCM|KingUnif28944.1	GO:0046658(anchored component of plasma membrane)	NA	NA	NA	hypothetical protein AQUCO_04000048v1 [Aquilegia coerulea]	NA	0.775053	0.161168	0	2.54285	4.58544	6.60198	21.8007	19.2461	24.1049	3.93707e-08	1.76527e-06	yes
gene-GIB67_026280	GIB67_026280	37808	rna-gnl|WGS:JACGCM|KingUnif39311.1	GO:0009507(chloroplast);GO:0042646(plastid nucleoid)	NA	NA	NA	PREDICTED: uncharacterized protein LOC108986742 isoform X1 [Juglans regia]	NA	4.78123	2.12709	5.92275	0.051657	1.58034	2.01587	0	0	0	3.94134e-08	1.76527e-06	yes
gene-GIB67_028530	GIB67_028530	42664	rna-gnl|WGS:JACGCM|KingUnif18779.1	GO:0005576(extracellular region);GO:0016042(lipid catabolic process);GO:0016788(hydrolase activity, acting on ester bonds);GO:0052689(carboxylic ester hydrolase activity)	00901(Indole alkaloid biosynthesis)	K21026	EC:3.1.1.80	GDSL esterase/lipase [Prunus yedoensis var. nudiflora]	NA	0	0	0	0	0.194984	0.38273	2.19761	2.36751	2.75542	4.03551e-08	1.80363e-06	yes
gene-GIB67_009051	GIB67_009051	1807	rna-gnl|WGS:JACGCM|KingUnif35312.1	GO:0004693(cyclin-dependent protein serine/threonine kinase activity);GO:0005515(protein binding);GO:0005634(nucleus);GO:0007049(cell cycle);GO:0010444(guard mother cell differentiation);GO:0042127(regulation of cell proliferation);GO:0048316(seed development);GO:0051301(cell division);GO:0051726(regulation of cell cycle)	04075(Plant hormone signal transduction)	K14505	NA	PREDICTED: cyclin-D3-1-like [Nelumbo nucifera]	NA	1.0898	1.31132	0	194.913	5.78086	163.701	6.0434	15.7871	3.0324	4.12539e-08	1.83992e-06	yes
gene-GIB67_042956	GIB67_042956	39143	rna-gnl|WGS:JACGCM|KingUnif25210.1	GO:0000272(polysaccharide catabolic process);GO:0004568(chitinase activity);GO:0005576(extracellular region);GO:0005618(cell wall);GO:0006032(chitin catabolic process);GO:0006952(defense response);GO:0008061(chitin binding);GO:0009611(response to wounding);GO:0009617(response to bacterium);GO:0009626(plant-type hypersensitive response);GO:0010262(somatic embryogenesis);GO:0016998(cell wall macrom…	00520(Amino sugar and nucleotide sugar metabolism)	K01183	EC:3.2.1.14	hypothetical protein AQUCO_00100867v1 [Aquilegia coerulea]	NA	93.0604	118.05	165.608	87.4597	110.945	108.991	4.45238	18.5688	6.45837	4.14491e-08	1.84231e-06	yes
gene-GIB67_007861	GIB67_007861	1981	rna-gnl|WGS:JACGCM|KingUnif40333.1	GO:0005737(cytoplasm);GO:0008150(biological_process);GO:0008429(phosphatidylethanolamine binding)	NA	NA	NA	PREDICTED: uncharacterized protein LOC103939823 [Pyrus x bretschneideri]	NA	0.137002	18.7641	0.383007	174.239	73.4901	165.44	0.136534	0.239509	1.80135	4.14814e-08	1.84231e-06	yes
gene-GIB67_037776	GIB67_037776	30718	rna-gnl|WGS:JACGCM|KingUnif10429.1	NA	NA	NA	NA		NA	0	0	0.564363	26.4152	39.6216	35.1984	1.48181	3.73755	13.6135	4.17785e-08	1.85163e-06	yes
gene-GIB67_035945	GIB67_035945	16350	rna-gnl|WGS:JACGCM|KingUnif18653.1	GO:0016021(integral component of membrane);GO:0042626(ATPase activity, coupled to transmembrane movement of substances);GO:0055085(transmembrane transport)	02010(ABC transporters)	K05658	EC:3.6.3.44	PREDICTED: ABC transporter B family member 15-like [Nelumbo nucifera]	NA	0	0	0	0.028449	0.080749	0	0.095746	2.53525	0.469793	4.31172e-08	1.90697e-06	yes
gene-GIB67_005557	GIB67_005557	10669	rna-gnl|WGS:JACGCM|KingUnif41517.1	GO:0005634(nucleus);GO:0008168(methyltransferase activity);GO:0016021(integral component of membrane);GO:0032259(methylation)	NA	NA	NA	PREDICTED: uncharacterized protein LOC104595642 [Nelumbo nucifera]	NA	14.5763	15.4356	33.1723	1.32632	0.703752	0.553182	2.50892	8.31954	7.10166	4.48535e-08	1.97963e-06	yes
gene-GIB67_016206	GIB67_016206	31402	rna-gnl|WGS:JACGCM|KingUnif18583.1	GO:0003677(DNA binding);GO:0003700(DNA binding transcription factor activity);GO:0005634(nucleus);GO:0005737(cytoplasm);GO:0006351(transcription, DNA-templated);GO:0006355(regulation of transcription, DNA-templated);GO:0008356(asymmetric cell division);GO:0034605(cellular response to heat);GO:0043565(sequence-specific DNA binding)	NA	NA	NA	PREDICTED: heat stress transcription factor B-4-like [Nelumbo nucifera]	NA	0.335672	0.800734	0.431714	29.2602	2.27963	23.2794	4.44006	3.32541	3.05303	4.51214e-08	1.98731e-06	yes
gene-GIB67_006193	GIB67_006193	32620	rna-gnl|WGS:JACGCM|KingUnif24815.1	GO:0010334(sesquiterpene synthase activity);GO:0051762(sesquiterpene biosynthetic process)	00902(Monoterpenoid biosynthesis)	K07385	EC:4.2.3.108	Terpene synthase [Macleaya cordata]	NA	0	0	0.065349	0.816558	7.23693	0.671439	1.48491	106.265	1.06744	4.58115e-08	2.01352e-06	yes
gene-GIB67_012406	GIB67_012406	33565	rna-gnl|WGS:JACGCM|KingUnif16732.1	GO:0033809(anthocyanin 6''-O-malonyltransferase activity)	00942(Anthocyanin biosynthesis)	K21383	EC:2.3.1.215	hypothetical protein AQUCO_03400344v1 [Aquilegia coerulea]	NA	0	0	0	0.149723	0.074383	6.24641	9.95343	8.57631	0.572403	4.63931e-08	2.03241e-06	yes
gene-GIB67_035451	GIB67_035451	4287	rna-gnl|WGS:JACGCM|KingUnif41210.1	GO:0016791(phosphatase activity)	00750(Vitamin B6 metabolism)	K13248	EC:3.1.3.74	inorganic pyrophosphatase 2 [Cinnamomum micranthum f. kanehirae]	NA	27.8793	193.478	269.191	0.975521	1.10508	0.913161	0.356908	43.6346	1.37935	4.64332e-08	2.03241e-06	yes
gene-GIB67_035349	GIB67_035349	20159	rna-gnl|WGS:JACGCM|KingUnif38963.1	GO:0003674(molecular_function);GO:0005576(extracellular region);GO:0005615(extracellular space);GO:0005618(cell wall);GO:0005794(Golgi apparatus);GO:0005829(cytosol);GO:0009505(plant-type cell wall);GO:0009741(response to brassinosteroid);GO:0048046(apoplast)	NA	NA	NA	Phosphate-induced protein 1 [Macleaya cordata]	NA	26.7224	317.602	165.25	132.981	58.2899	106.554	3.90314	8.856	6.00541	4.66011e-08	2.03555e-06	yes
gene-GIB67_037921	GIB67_037921	35211	rna-gnl|WGS:JACGCM|KingUnif25799.1	GO:0003676(nucleic acid binding);GO:0003677(DNA binding);GO:0003700(DNA binding transcription factor activity);GO:0005515(protein binding);GO:0005634(nucleus);GO:0006351(transcription, DNA-templated);GO:0006355(regulation of transcription, DNA-templated);GO:0010187(negative regulation of seed germination);GO:0046872(metal ion binding)	NA	NA	NA	hypothetical protein AQUCO_03600085v1 [Aquilegia coerulea]	NA	0	0	0	6.12236	0	13.6228	0	0.077775	0	4.68113e-08	2.04053e-06	yes
gene-GIB67_028758	GIB67_028758	7851	rna-gnl|WGS:JACGCM|KingUnif12620.1	GO:0005829(cytosol);GO:0009611(response to wounding);GO:0016787(hydrolase activity);GO:0046872(metal ion binding)	NA	NA	NA	PREDICTED: nudix hydrolase 8-like [Nelumbo nucifera]	NA	8.03114	19.8617	23.3062	0	0.441212	0.109283	0.111048	0.816073	0	4.753e-08	2.06761e-06	yes
gene-GIB67_041281	GIB67_041281	10079	rna-gnl|WGS:JACGCM|KingUnif37671.1	GO:0003959(NADPH dehydrogenase activity);GO:0005622(intracellular);GO:0055114(oxidation-reduction process)	00592(alpha-Linolenic acid metabolism)	K05894	EC:1.3.1.42	putative 12-oxophytodienoate reductase 11 isoform X2 [Hevea brasiliensis]	NA	35.9752	282.423	301.364	9.4166	13.0326	9.45619	7.06391	43.0697	5.12215	4.7817e-08	2.07536e-06	yes
gene-GIB67_028914	GIB67_028914	31490	rna-gnl|WGS:JACGCM|KingUnif17259.1	GO:0000495(box H/ACA snoRNA 3'-end processing);GO:0003723(RNA binding);GO:0005634(nucleus);GO:0005730(nucleolus);GO:0005829(cytosol);GO:0009506(plasmodesma);GO:0009982(pseudouridine synthase activity);GO:0031118(rRNA pseudouridine synthesis);GO:0031120(snRNA pseudouridine synthesis);GO:0031429(box H/ACA snoRNP complex);GO:1990481(mRNA pseudouridine synthesis)	03008(Ribosome biogenesis in eukaryotes)	K11131	EC:5.4.99.-	H/ACA ribonucleoprotein complex subunit 4 [Morus notabilis]	NA	6.27655	0.547319	0.727133	4.06265	0.900167	1.77502	0	0	0	4.79042e-08	2.07536e-06	yes
gene-GIB67_025208	GIB67_025208	14049	rna-gnl|WGS:JACGCM|KingUnif03872.1	GO:0004674(protein serine/threonine kinase activity);GO:0005886(plasma membrane);GO:0006468(protein phosphorylation);GO:0006952(defense response);GO:0009506(plasmodesma)	NA	NA	NA	PREDICTED: G-type lectin S-receptor-like serine/threonine-protein kinase At4g27290 [Gossypium hirsutum]	NA	2.60627	11.9782	16.0178	0.81532	1.98687	0.553067	0.176542	0.883736	0.426098	4.83605e-08	2.09085e-06	yes
gene-GIB67_012844	GIB67_012844	11394	rna-gnl|WGS:JACGCM|KingUnif10465.1	GO:0003924(GTPase activity);GO:0005198(structural molecule activity);GO:0005515(protein binding);GO:0005525(GTP binding);GO:0005737(cytoplasm);GO:0009507(chloroplast);GO:0009534(chloroplast thylakoid);GO:0009570(chloroplast stroma);GO:0010020(chloroplast fission);GO:0032153(cell division site);GO:0043621(protein self-association);GO:0051301(cell division)	NA	NA	NA	Cell division protein FtsZ [Macleaya cordata]	NA	2.04456	2.458	6.36669	37.2624	75.0309	82.6851	79.4662	17.1752	28.7514	4.90427e-08	2.11603e-06	yes
gene-GIB67_005500	GIB67_005500	10610	rna-gnl|WGS:JACGCM|KingUnif23496.1	GO:0005634(nucleus);GO:0008150(biological_process)	NA	NA	NA	protein of unknown function DUF4378 [Macleaya cordata]	NA	2.05	9.50744	2.19377	0.271963	0.42844	0.142895	0.308818	0.27955	0.525318	5.17674e-08	2.22905e-06	yes
gene-GIB67_009394	GIB67_009394	15721	rna-gnl|WGS:JACGCM|KingUnif27378.1	GO:0005737(cytoplasm);GO:0030001(metal ion transport);GO:0046914(transition metal ion binding);GO:0046916(cellular transition metal ion homeostasis)	NA	NA	NA	hypothetical protein AQUCO_04000118v1 [Aquilegia coerulea]	NA	0	0	0.060202	15.5162	0	16.6192	0.060176	0.144235	0.050843	5.22815e-08	2.24531e-06	yes
gene-GIB67_028415	GIB67_028415	22781	rna-gnl|WGS:JACGCM|KingUnif36946.1	GO:0004332(fructose-bisphosphate aldolase activity);GO:0005737(cytoplasm);GO:0006096(glycolytic process)	00010(Glycolysis / Gluconeogenesis);00030(Pentose phosphate pathway);00051(Fructose and mannose metabolism);00710(Carbon fixation in photosynthetic organisms)	K01623	EC:4.1.2.13	fructose-bisphosphate aldolase 6, cytosolic [Cucurbita moschata]	NA	0	0	0	0	0	0	3.71265	7.58636	0.246722	5.2357e-08	2.24531e-06	yes
gene-GIB67_021798	GIB67_021798	3484	rna-gnl|WGS:JACGCM|KingUnif27790.1	GO:0006869(lipid transport);GO:0008289(lipid binding)	NA	NA	NA	PREDICTED: LOW QUALITY PROTEIN: 36.4 kDa proline-rich protein [Tarenaya hassleriana]	NA	1.41839	0.217171	0.225422	207.531	10.2322	178.666	22.3053	0.42189	37.6264	5.40377e-08	2.3127e-06	yes
gene-GIB67_004088	GIB67_004088	7498	rna-gnl|WGS:JACGCM|KingUnif30101.1	GO:0005618(cell wall);GO:0033609(oxalate metabolic process);GO:0046564(oxalate decarboxylase activity)	NA	NA	NA	PREDICTED: germin-like protein subfamily T member 2 [Cucumis melo]	NA	0.1365	0.249898	0.946614	7.06284	42.1651	17.6162	3.27778	10.6771	6.19693	5.52678e-08	2.36058e-06	yes
gene-GIB67_031951	GIB67_031951	6672	rna-gnl|WGS:JACGCM|KingUnif04183.1	GO:0008643(carbohydrate transport);GO:0016021(integral component of membrane);GO:0051119(sugar transmembrane transporter activity)	NA	NA	NA	hypothetical protein AQUCO_01400360v1 [Aquilegia coerulea]	NA	8.06237	485.288	71.9517	0.437911	1.70878	0.901354	0.503207	25.846	1.09518	5.53888e-08	2.36099e-06	yes
gene-GIB67_017824	GIB67_017824	20537	rna-gnl|WGS:JACGCM|KingUnif05596.1	GO:0003677(DNA binding);GO:0003700(DNA binding transcription factor activity);GO:0005515(protein binding);GO:0005634(nucleus);GO:0006355(regulation of transcription, DNA-templated);GO:0009944(polarity specification of adaxial/abaxial axis);GO:0045165(cell fate commitment);GO:0046872(metal ion binding);GO:1902183(regulation of shoot apical meristem development);GO:2000024(regulation of leaf develo…	NA	NA	NA	PREDICTED: axial regulator YABBY 5-like isoform X1 [Nelumbo nucifera]	NA	68.7024	139.023	38.4944	45.4424	0.577061	50.0185	0.242155	0.065635	1.00814	5.77327e-08	2.45596e-06	yes
gene-GIB67_006324	GIB67_006324	4128	rna-gnl|WGS:JACGCM|KingUnif20995.1	GO:0009705(plant-type vacuole membrane);GO:0015140(malate transmembrane transporter activity)	NA	NA	NA	hypothetical protein AQUCO_01300176v1 [Aquilegia coerulea]	NA	41.2713	1.67463	14.9755	1.18986	2.09218	1.64875	1.61163	0.511024	0.836946	5.79319e-08	2.4595e-06	yes
gene-GIB67_015349	GIB67_015349	41620	rna-gnl|WGS:JACGCM|KingUnif39111.1	GO:0000024(maltose biosynthetic process);GO:0005983(starch catabolic process);GO:0009409(response to cold);GO:0009507(chloroplast);GO:0009570(chloroplast stroma);GO:0016161(beta-amylase activity);GO:0102229(amylopectin maltohydrolase activity)	00500(Starch and sucrose metabolism)	K01177	EC:3.2.1.2	Glycoside hydrolase [Macleaya cordata]	NA	3.05312	44.7053	261.682	0.638146	9.76363	4.1268	0.956074	2.9238	0.446417	5.87773e-08	2.4904e-06	yes
gene-GIB67_039473	GIB67_039473	34664	rna-gnl|WGS:JACGCM|KingUnif00694.1	NA	NA	NA	NA	PREDICTED: E3 ubiquitin-protein ligase SP1 [Nelumbo nucifera]	NA	9.2873	13.6236	13.667	1.68352	1.36908	1.96286	2.34449	4.34849	2.46532	5.98015e-08	2.52497e-06	yes
gene-GIB67_041056	GIB67_041056	34079	rna-gnl|WGS:JACGCM|KingUnif18095.1	GO:0009416(response to light stimulus);GO:0016567(protein ubiquitination)	03050(Proteasome)	K03063	NA	PREDICTED: BTB/POZ domain-containing protein At3g08570 isoform X1 [Nelumbo nucifera]	NA	0	0	0.038009	1.8936	0.785869	4.27154	1.64389	0.785471	1.31512	5.98318e-08	2.52497e-06	yes
gene-GIB67_021009	GIB67_021009	14155	rna-gnl|WGS:JACGCM|KingUnif01095.1	GO:0009718(anthocyanin-containing compound biosynthetic process);GO:0033303(quercetin O-glucoside biosynthetic process);GO:0033330(kaempferol O-glucoside biosynthetic process);GO:0033485(cyanidin 3-O-glucoside biosynthetic process);GO:0047213(anthocyanidin 3-O-glucosyltransferase activity)	00942(Anthocyanin biosynthesis)	K12930	EC:2.4.1.115	anthocyanidin 3-O-glucosyltransferase [Paeonia delavayi]	NA	0.496846	0.171603	1.30381	33.5853	0.218391	34.412	0.039445	0.665046	0.159525	6.0114e-08	2.53184e-06	yes
gene-GIB67_022721	GIB67_022721	1568	rna-gnl|WGS:JACGCM|KingUnif29446.1	GO:0005737(cytoplasm);GO:0030001(metal ion transport);GO:0046914(transition metal ion binding);GO:0046916(cellular transition metal ion homeostasis)	NA	NA	NA	Heavy metal-associated domain [Macleaya cordata]	NA	0.947245	1.07164	2.5229	53.824	8.47354	62.1062	2.80197	10.7584	5.57082	6.34918e-08	2.6688e-06	yes
gene-GIB67_022638	GIB67_022638	1484	rna-gnl|WGS:JACGCM|KingUnif42224.1	GO:0009507(chloroplast);GO:0009523(photosystem II);GO:0009535(chloroplast thylakoid membrane);GO:0009611(response to wounding);GO:0009765(photosynthesis, light harvesting);GO:0016021(integral component of membrane);GO:0016168(chlorophyll binding);GO:0071486(cellular response to high light intensity);GO:0071492(cellular response to UV-A)	NA	NA	NA	PREDICTED: stress enhanced protein 2, chloroplastic [Nelumbo nucifera]	NA	13.663	70.8635	119.476	3.24108	2.73201	3.44696	7.9323	19.6651	2.13898	6.58469e-08	2.76231e-06	yes
gene-GIB67_011899	GIB67_011899	28895	rna-gnl|WGS:JACGCM|KingUnif36185.1	GO:0005802(trans-Golgi network);GO:0005886(plasma membrane)	04016(MAPK signaling pathway - plant);04075(Plant hormone signal transduction)	K14514	NA	PREDICTED: phosphate transporter PHO1 homolog 3 [Nelumbo nucifera]	NA	1.65926	4.88823	7.29932	56.2865	70.8156	55.9715	9.24937	27.1385	24.4483	6.70295e-08	2.80636e-06	yes
gene-GIB67_026316	GIB67_026316	14704	rna-gnl|WGS:JACGCM|KingUnif27806.1	GO:0004185(serine-type carboxypeptidase activity);GO:0005615(extracellular space);GO:0005773(vacuole);GO:0009742(brassinosteroid mediated signaling pathway);GO:0051603(proteolysis involved in cellular protein catabolic process)	NA	NA	NA	Peptidase S10, serine carboxypeptidase [Corchorus capsularis]	NA	0.078628	0	0	1.73104	0.039403	7.99639	0	0	0	6.74541e-08	2.81857e-06	yes
gene-GIB67_004085	GIB67_004085	7493	rna-gnl|WGS:JACGCM|KingUnif33196.1	GO:0010334(sesquiterpene synthase activity);GO:0051762(sesquiterpene biosynthetic process)	00902(Monoterpenoid biosynthesis)	K07385	EC:4.2.3.108	Terpene synthase [Macleaya cordata]	NA	0.537872	0.708178	2.54052	0	0.012864	0.073143	0	0	0	6.7882e-08	2.82988e-06	yes
gene-GIB67_017947	GIB67_017947	22595	rna-gnl|WGS:JACGCM|KingUnif30401.1	GO:0003677(DNA binding);GO:0003700(DNA binding transcription factor activity);GO:0005634(nucleus);GO:0006351(transcription, DNA-templated);GO:0006355(regulation of transcription, DNA-templated);GO:0007275(multicellular organism development);GO:0010371(regulation of gibberellin biosynthetic process);GO:0045487(gibberellin catabolic process);GO:0046983(protein dimerization activity)	00040(Pentose and glucuronate interconversions);00053(Ascorbate and aldarate metabolism);00520(Amino sugar and nucleotide sugar metabolism)	K16190	EC:2.7.1.43	PREDICTED: transcription factor bHLH93-like [Nelumbo nucifera]	NA	0.137904	0	0	22.7855	0.069726	29.045	0	0.129579	0.271183	6.79918e-08	2.82988e-06	yes
gene-GIB67_032033	GIB67_032033	17650	rna-gnl|WGS:JACGCM|KingUnif24471.1	GO:0000139(Golgi membrane);GO:0005794(Golgi apparatus);GO:0010413(glucuronoxylan metabolic process);GO:0010417(glucuronoxylan biosynthetic process);GO:0016021(integral component of membrane);GO:0016051(carbohydrate biosynthetic process);GO:0016757(transferase activity, transferring glycosyl groups);GO:0016758(transferase activity, transferring hexosyl groups);GO:0045489(pectin biosynthetic proces…	NA	NA	NA	hypothetical protein AQUCO_00500444v1 [Aquilegia coerulea]	NA	0	0.034618	0	0	0.174562	0.442337	2.13318	3.85153	4.1599	7.53417e-08	3.12963e-06	yes
gene-GIB67_029268	GIB67_029268	13729	rna-gnl|WGS:JACGCM|KingUnif25170.1	GO:0000302(response to reactive oxygen species);GO:0003677(DNA binding);GO:0003700(DNA binding transcription factor activity);GO:0005634(nucleus);GO:0006351(transcription, DNA-templated);GO:0006355(regulation of transcription, DNA-templated);GO:0009723(response to ethylene);GO:0009873(ethylene-activated signaling pathway);GO:0035865(cellular response to potassium ion);GO:0043565(sequence-specific…	NA	NA	NA	uncharacterized protein LOC8278484 [Ricinus communis]	NA	0.218976	0	0.079215	2.90121	12.6082	2.5633	4.64083	81.8313	2.77641	7.61274e-08	3.15609e-06	yes
gene-GIB67_013965	GIB67_013965	36584	rna-gnl|WGS:JACGCM|KingUnif16548.1	GO:0005576(extracellular region)	00073(Cutin, suberine and wax biosynthesis)	K15402	EC:1.14.-.-	Cytochrome P450 [Macleaya cordata]	NA	0.11354	0.075149	0.133833	9.61993	0.393781	18.0489	0	0.012083	0.454318	7.70148e-08	3.18664e-06	yes
gene-GIB67_032973	GIB67_032973	17204	rna-gnl|WGS:JACGCM|KingUnif37222.1	GO:0005634(nucleus);GO:0008150(biological_process)	NA	NA	NA	zinc finger protein [Macleaya cordata]	NA	0.186991	0.151905	0.079003	0.789124	3.44429	4.55712	3.96778	2.50946	2.97338	7.71781e-08	3.18717e-06	yes
gene-GIB67_001910	GIB67_001910	5954	rna-gnl|WGS:JACGCM|KingUnif32077.1	GO:0005618(cell wall);GO:0009506(plasmodesma);GO:0010497(plasmodesmata-mediated intercellular transport);GO:0033609(oxalate metabolic process);GO:0046564(oxalate decarboxylase activity);GO:2000280(regulation of root development)	NA	NA	NA	germin-like protein subfamily 2 member 4 [Manihot esculenta]	NA	7.25635	17.4842	2.12151	693.153	148.779	3071.34	9696.64	468.873	11759.5	7.80498e-08	3.2169e-06	yes
gene-GIB67_022249	GIB67_022249	26564	rna-gnl|WGS:JACGCM|KingUnif10830.1	GO:0005515(protein binding);GO:0009507(chloroplast);GO:0009523(photosystem II);GO:0009534(chloroplast thylakoid);GO:0009535(chloroplast thylakoid membrane);GO:0009579(thylakoid);GO:0009654(photosystem II oxygen evolving complex);GO:0009735(response to cytokinin);GO:0010270(photosystem II oxygen evolving complex assembly);GO:0015979(photosynthesis)	00195(Photosynthesis)	K03541	NA	photosystem II polypeptide, chloroplastic [Cinnamomum micranthum f. kanehirae]	NA	428.989	45.7657	620.935	82.1541	8.20104	34.188	17.9657	9.20435	11.4325	7.88379e-08	3.24307e-06	yes
gene-GIB67_033687	GIB67_033687	2935	rna-gnl|WGS:JACGCM|KingUnif09429.1	GO:0004620(phospholipase activity);GO:0005737(cytoplasm);GO:0016020(membrane);GO:0047372(acylglycerol lipase activity)	NA	NA	NA	hypothetical protein AQUCO_01500169v1 [Aquilegia coerulea]	NA	9.20581	21.4527	9.74198	26.194	40.2699	54.2416	90.8371	187.835	122.742	7.98707e-08	3.27919e-06	yes
gene-GIB67_033265	GIB67_033265	20453	rna-gnl|WGS:JACGCM|KingUnif19858.1	GO:0005618(cell wall);GO:0033609(oxalate metabolic process);GO:0046564(oxalate decarboxylase activity)	NA	NA	NA	putative germin-like protein 9-2 [Manihot esculenta]	NA	0.06398	0	0	0.18443	2.27528	0.466843	0.155688	301.755	0.072359	8.21736e-08	3.36721e-06	yes
gene-GIB67_034304	GIB67_034304	7293	rna-gnl|WGS:JACGCM|KingUnif13097.1	GO:0003777(microtubule motor activity);GO:0005871(kinesin complex);GO:0007018(microtubule-based movement);GO:0016887(ATPase activity)	NA	NA	NA	Kinesin [Macleaya cordata]	NA	0.054191	0.055751	0.214685	7.26595	0.187488	6.49463	0.329475	0.22173	0.546961	8.2375e-08	3.36895e-06	yes
gene-GIB67_009436	GIB67_009436	15763	rna-gnl|WGS:JACGCM|KingUnif25478.1	GO:0003756(protein disulfide isomerase activity);GO:0005515(protein binding);GO:0005634(nucleus);GO:0005737(cytoplasm);GO:0009055(electron transfer activity);GO:0015035(protein disulfide oxidoreductase activity);GO:0015036(disulfide oxidoreductase activity);GO:0045454(cell redox homeostasis);GO:0045892(negative regulation of transcription, DNA-templated);GO:0048441(petal development);GO:0048448(s…	NA	NA	NA	PREDICTED: glutaredoxin-C1 [Vitis vinifera]	NA	0.575514	3.79287	0.357496	137.269	2.6555	175.223	3.55234	12.6817	7.02428	8.25387e-08	3.36914e-06	yes
gene-GIB67_012469	GIB67_012469	18331	rna-gnl|WGS:JACGCM|KingUnif09519.1	GO:0006820(anion transport);GO:0016021(integral component of membrane);GO:0022857(transmembrane transporter activity);GO:0055085(transmembrane transport)	NA	NA	NA	hypothetical protein AQUCO_05300047v1 [Aquilegia coerulea]	NA	0.251484	0.181681	0.350725	12.4733	2.53764	9.47594	0.973428	0.902077	3.59772	8.30948e-08	3.38531e-06	yes
gene-GIB67_043215	GIB67_043215	9913	rna-gnl|WGS:JACGCM|KingUnif34543.1	GO:0004672(protein kinase activity);GO:0005524(ATP binding);GO:0005634(nucleus);GO:0006468(protein phosphorylation);GO:0006950(response to stress);GO:0010053(root epidermal cell differentiation);GO:0016787(hydrolase activity)	NA	NA	NA	hypothetical protein COLO4_18649 [Corchorus olitorius]	NA	12.6357	4.00801	12.5851	0.386575	0.060354	3.26612	0.164297	0.210275	0.166978	8.33149e-08	3.38777e-06	yes
gene-GIB67_041347	GIB67_041347	10155	rna-gnl|WGS:JACGCM|KingUnif09501.1	GO:0008194(UDP-glycosyltransferase activity);GO:0009813(flavonoid biosynthetic process);GO:0043231(intracellular membrane-bounded organelle);GO:0052696(flavonoid glucuronidation)	00908(Zeatin biosynthesis)	K13495	EC:2.4.1.215	UDP-glucuronosyl/UDP-glucosyltransferase [Macleaya cordata]	NA	28.5048	24.5225	22.8275	19.8048	19.9975	27.1235	127.852	115.652	103.316	8.35744e-08	3.39181e-06	yes
gene-GIB67_019248	GIB67_019248	16911	rna-gnl|WGS:JACGCM|KingUnif04124.1	GO:0003677(DNA binding);GO:0003700(DNA binding transcription factor activity);GO:0005634(nucleus);GO:0006351(transcription, DNA-templated);GO:0006355(regulation of transcription, DNA-templated);GO:0009738(abscisic acid-activated signaling pathway);GO:0019760(glucosinolate metabolic process);GO:0043565(sequence-specific DNA binding)	NA	NA	NA	AP2/ERF domain [Macleaya cordata]	NA	0.196519	251.748	54.0279	68.0898	4.27307	36.9661	0.209185	0.087521	0.154203	8.75845e-08	3.54776e-06	yes
gene-GIB67_034074	GIB67_034074	26875	rna-gnl|WGS:JACGCM|KingUnif29508.1	GO:0000139(Golgi membrane);GO:0005794(Golgi apparatus);GO:0009294(DNA mediated transformation);GO:0009617(response to bacterium);GO:0016021(integral component of membrane);GO:0016757(transferase activity, transferring glycosyl groups);GO:0047259(glucomannan 4-beta-mannosyltransferase activity);GO:0051753(mannan synthase activity);GO:0071555(cell wall organization)	NA	NA	NA	hypothetical protein AQUCO_00900991v1 [Aquilegia coerulea]	NA	2.00071	0.385854	2.53737	2.4574	9.03457	39.536	130.615	28.2588	55.4953	8.78933e-08	3.54928e-06	yes
gene-GIB67_003545	GIB67_003545	23813	rna-gnl|WGS:JACGCM|KingUnif19666.1	GO:0008150(biological_process);GO:0016787(hydrolase activity)	NA	NA	NA	Protein of unknown function DUF829 [Macleaya cordata]	NA	17.5766	108.199	123.19	5.77453	7.39091	10.4023	1.99564	9.9774	0.709323	8.79572e-08	3.54928e-06	yes
gene-GIB67_025722	GIB67_025722	42586	rna-gnl|WGS:JACGCM|KingUnif39869.1	GO:0016020(membrane);GO:0016709(oxidoreductase activity, acting on paired donors, with incorporation or reduction of molecular oxygen, NAD(P)H as one donor, and incorporation of one atom of oxygen);GO:0044550(secondary metabolite biosynthetic process)	NA	NA	NA	hypothetical protein AQUCO_09300003v1 [Aquilegia coerulea]	NA	2.73475	0.591653	0.21386	6.05624	9.0333	43.3751	81.297	47.9783	32.7859	8.82018e-08	3.55239e-06	yes
gene-GIB67_032453	GIB67_032453	38532	rna-gnl|WGS:JACGCM|KingUnif09457.1	GO:0003674(molecular_function);GO:0003723(RNA binding);GO:0005739(mitochondrion);GO:0008150(biological_process)	NA	NA	NA	PREDICTED: pentatricopeptide repeat-containing protein At5g66520-like [Nelumbo nucifera]	NA	17.768	8.25569	33.7552	4.82954	2.05829	2.55996	1.40726	1.25563	1.25825	8.88179e-08	3.57041e-06	yes
gene-GIB67_041765	GIB67_041765	27317	rna-gnl|WGS:JACGCM|KingUnif31985.1	GO:0005634(nucleus);GO:0005737(cytoplasm);GO:0008794(arsenate reductase (glutaredoxin) activity);GO:0009055(electron transfer activity);GO:0015035(protein disulfide oxidoreductase activity);GO:0045454(cell redox homeostasis);GO:0046872(metal ion binding);GO:0051537(2 iron, 2 sulfur cluster binding)	NA	NA	NA	Glutaredoxin [Macleaya cordata]	NA	0.064477	12.3471	71.4141	0	0.355026	0.313859	0	0	0.185802	8.89916e-08	3.57062e-06	yes
gene-GIB67_016854	GIB67_016854	32415	rna-gnl|WGS:JACGCM|KingUnif31167.1	GO:0000139(Golgi membrane);GO:0005794(Golgi apparatus);GO:0006486(protein glycosylation);GO:0016021(integral component of membrane);GO:0016757(transferase activity, transferring glycosyl groups);GO:0071555(cell wall organization)	NA	NA	NA	PREDICTED: probable glycosyltransferase At3g07620 [Nelumbo nucifera]	NA	0	0	0	0.719641	0.161402	0.630127	5.36142	7.71565	1.77319	9.06289e-08	3.62944e-06	yes
gene-GIB67_007915	GIB67_007915	673	rna-gnl|WGS:JACGCM|KingUnif04326.1	GO:0004602(glutathione peroxidase activity);GO:0006979(response to oxidative stress);GO:0009507(chloroplast);GO:0055114(oxidation-reduction process);GO:0080167(response to karrikin)	00590(Arachidonic acid metabolism);00480(Glutathione metabolism)	K00432	EC:1.11.1.9	hypothetical protein AQUCO_01600291v1 [Aquilegia coerulea]	NA	48.9987	6.125	100.899	8.08798	3.47316	7.81606	2.07465	4.48266	1.4825	9.14607e-08	3.65014e-06	yes
gene-GIB67_039025	GIB67_039025	33871	rna-gnl|WGS:JACGCM|KingUnif13841.1	GO:0004601(peroxidase activity);GO:0009505(plant-type cell wall);GO:0009664(plant-type cell wall organization)	00940(Phenylpropanoid biosynthesis)	K00430	EC:1.11.1.7	PREDICTED: peroxidase 24 [Eucalyptus grandis]	NA	0	0	0	0.996405	4.69985	2.44431	0	0.296746	0.058427	9.14905e-08	3.65014e-06	yes
gene-GIB67_001633	GIB67_001633	41000	rna-gnl|WGS:JACGCM|KingUnif40263.1	GO:0016020(membrane);GO:0016709(oxidoreductase activity, acting on paired donors, with incorporation or reduction of molecular oxygen, NAD(P)H as one donor, and incorporation of one atom of oxygen);GO:0044550(secondary metabolite biosynthetic process)	NA	NA	NA	Cytochrome P450 [Macleaya cordata]	NA	10.3275	121.447	4.10505	3.03286	1.86822	0.954939	0.072621	1.95979	0.21808	9.17253e-08	3.65263e-06	yes
gene-GIB67_029687	GIB67_029687	33723	rna-gnl|WGS:JACGCM|KingUnif24573.1	GO:0004413(homoserine kinase activity);GO:0005524(ATP binding);GO:0006952(defense response);GO:0009086(methionine biosynthetic process);GO:0009088(threonine biosynthetic process);GO:0009092(homoserine metabolic process);GO:0009507(chloroplast);GO:0009570(chloroplast stroma);GO:0009617(response to bacterium);GO:0009620(response to fungus);GO:0016310(phosphorylation)	00260(Glycine, serine and threonine metabolism)	K00872	EC:2.7.1.39	Homoserine kinase [Macleaya cordata]	NA	2.14267	2.7216	0.976144	3.23913	3.49189	3.9978	0	0	0	9.24937e-08	3.67632e-06	yes
gene-GIB67_027714	GIB67_027714	9421	rna-gnl|WGS:JACGCM|KingUnif22965.1	GO:0003676(nucleic acid binding);GO:0003677(DNA binding);GO:0003700(DNA binding transcription factor activity);GO:0005515(protein binding);GO:0005634(nucleus);GO:0006351(transcription, DNA-templated);GO:0006355(regulation of transcription, DNA-templated);GO:0008270(zinc ion binding);GO:0008356(asymmetric cell division);GO:0010075(regulation of meristem growth);GO:0042803(protein homodimerization …	00052(Galactose metabolism);00600(Sphingolipid metabolism);00531(Glycosaminoglycan degradation);00604(Glycosphingolipid biosynthesis - ganglio series);00511(Other glycan degradation)	K12309	EC:3.2.1.23	hypothetical protein AQUCO_02700051v1, partial [Aquilegia coerulea]	NA	2.1807	1.79538	3.22013	22.9834	15.8708	46.8387	22.5107	8.18728	21.7533	9.33357e-08	3.70284e-06	yes
gene-GIB67_041998	GIB67_041998	4535	rna-gnl|WGS:JACGCM|KingUnif00610.1	GO:0000082(G1/S transition of mitotic cell cycle);GO:0000307(cyclin-dependent protein kinase holoenzyme complex);GO:0004693(cyclin-dependent protein serine/threonine kinase activity);GO:0005515(protein binding);GO:0005524(ATP binding);GO:0005634(nucleus);GO:0005737(cytoplasm);GO:0006468(protein phosphorylation);GO:0007165(signal transduction);GO:0007275(multicellular organism development);GO:0008…	NA	NA	NA	Protein kinase domain [Macleaya cordata]	NA	0.763711	0.658154	1.37876	38.5566	1.52976	46.2599	6.43254	2.98319	2.99931	9.46119e-08	3.74646e-06	yes
gene-GIB67_000034	GIB67_000034	20635	rna-gnl|WGS:JACGCM|KingUnif15012.1	GO:0005887(integral component of plasma membrane);GO:0015179(L-amino acid transmembrane transporter activity);GO:0015297(antiporter activity)	NA	NA	NA	hypothetical protein AQUCO_00400618v1 [Aquilegia coerulea]	NA	22.3095	19.0278	114.072	5.70779	2.91136	5.09623	9.88318	8.69642	9.62091	9.60088e-08	3.78853e-06	yes
gene-GIB67_039321	GIB67_039321	24648	rna-gnl|WGS:JACGCM|KingUnif36401.1	GO:0004837(tyrosine decarboxylase activity);GO:0005737(cytoplasm);GO:0006520(cellular amino acid metabolic process);GO:0006559(L-phenylalanine catabolic process);GO:0009611(response to wounding);GO:0016740(transferase activity);GO:0016831(carboxy-lyase activity);GO:0030170(pyridoxal phosphate binding);GO:1990055(phenylacetaldehyde synthase activity)	00350(Tyrosine metabolism);00360(Phenylalanine metabolism);00380(Tryptophan metabolism);00901(Indole alkaloid biosynthesis);00950(Isoquinoline alkaloid biosynthesis);00965(Betalain biosynthesis)	K01593	EC:4.1.1.28;EC:4.1.1.105	PREDICTED: tyrosine/DOPA decarboxylase 2-like [Nelumbo nucifera]	NA	0.084949	0.188028	0.903107	8.57829	5.06272	55.0837	0.011247	1.07042	0.033388	9.60848e-08	3.78853e-06	yes
gene-GIB67_022578	GIB67_022578	38730	rna-gnl|WGS:JACGCM|KingUnif09997.1	GO:0005737(cytoplasm);GO:0016020(membrane)	00040(Pentose and glucuronate interconversions);00051(Fructose and mannose metabolism)	K01805	EC:5.3.1.5	Xylose isomerase [Macleaya cordata]	NA	29.378	524.976	918.738	26.797	34.2202	10.6189	14.0796	35.6604	14.7773	9.62108e-08	3.78853e-06	yes
gene-GIB67_020217	GIB67_020217	3071	rna-gnl|WGS:JACGCM|KingUnif30213.1	GO:0005737(cytoplasm);GO:0009733(response to auxin);GO:0016874(ligase activity)	04075(Plant hormone signal transduction)	K14487	NA	PREDICTED: probable indole-3-acetic acid-amido synthetase GH3.1 [Vitis vinifera]	NA	0.955394	2.04101	0.843814	5.24611	31.3257	86.7175	174.717	30.6578	17.5446	9.76487e-08	3.83762e-06	yes
gene-GIB67_021555	GIB67_021555	37926	rna-gnl|WGS:JACGCM|KingUnif12178.1	GO:0004675(transmembrane receptor protein serine/threonine kinase activity);GO:0005524(ATP binding);GO:0005886(plasma membrane);GO:0006952(defense response);GO:0009506(plasmodesma);GO:0016301(kinase activity)	NA	NA	NA	PREDICTED: probable receptor-like protein kinase At5g56460 [Nelumbo nucifera]	NA	60.1942	141.489	43.6415	4.79296	9.13634	7.69763	16.7802	41.0433	16.1858	9.782e-08	3.83762e-06	yes
gene-GIB67_023566	GIB67_023566	1031	rna-gnl|WGS:JACGCM|KingUnif16536.1	GO:0005886(plasma membrane);GO:0006820(anion transport);GO:0008381(mechanosensitive ion channel activity)	NA	NA	NA	hypothetical protein AQUCO_00700835v1 [Aquilegia coerulea]	NA	0	0	0	0.149172	0.27997	0.725171	1.07653	0.352786	0.635243	9.8866e-08	3.87149e-06	yes
gene-GIB67_029104	GIB67_029104	14442	rna-gnl|WGS:JACGCM|KingUnif05401.1	GO:0004674(protein serine/threonine kinase activity);GO:0005886(plasma membrane);GO:0006468(protein phosphorylation)	NA	NA	NA	probable receptor-like protein kinase At5g20050 [Phoenix dactylifera]	NA	0.028655	0	0	0.497185	2.1402	1.11646	2.47359	1.27269	1.48703	9.95508e-08	3.89111e-06	yes
gene-GIB67_013879	GIB67_013879	36500	rna-gnl|WGS:JACGCM|KingUnif10840.1	GO:0004672(protein kinase activity);GO:0005515(protein binding);GO:0005524(ATP binding);GO:0005634(nucleus);GO:0005737(cytoplasm);GO:0006952(defense response);GO:0007623(circadian rhythm);GO:0009414(response to water deprivation);GO:0009416(response to light stimulus);GO:0009583(detection of light stimulus);GO:0009637(response to blue light);GO:0009638(phototropism);GO:0009640(photomorphogenesis)…	04712(Circadian rhythm - plant)	K12118	NA	Cryptochrome/DNA photolyase [Macleaya cordata]	NA	20.9703	197.169	54.2326	10.2665	2.08216	10.9652	6.04667	10.0291	5.55242	1.0102e-07	3.9381e-06	yes
gene-GIB67_028750	GIB67_028750	7841	rna-gnl|WGS:JACGCM|KingUnif35376.1	GO:0003674(molecular_function);GO:0005737(cytoplasm);GO:0008150(biological_process)	NA	NA	NA	hypothetical protein BVC80_8411g9 [Macleaya cordata]	NA	2.96672	5.44044	7.50423	4.62637	4.73846	2.42255	5.79407	84.9647	59.4429	1.01125e-07	3.9381e-06	yes
gene-GIB67_022364	GIB67_022364	14488	rna-gnl|WGS:JACGCM|KingUnif26963.1	GO:0004144(diacylglycerol O-acyltransferase activity);GO:0005886(plasma membrane);GO:0019432(triglyceride biosynthetic process);GO:0047196(long-chain-alcohol O-fatty-acyltransferase activity)	NA	NA	NA	hypothetical protein AQUCO_09900009v1 [Aquilegia coerulea]	NA	154.057	126.46	295.049	9.96094	1.43512	87.4554	1.30716	4.62759	1.87272	1.01895e-07	3.96082e-06	yes
gene-GIB67_001373	GIB67_001373	14099	rna-gnl|WGS:JACGCM|KingUnif32490.1	GO:0000771(agglutination involved in conjugation);GO:0005536(glucose binding);GO:0005537(mannose binding);GO:0005575(cellular_component)	NA	NA	NA	hypothetical protein AQUCO_00700319v1 [Aquilegia coerulea]	NA	49.51	168.017	122.756	2.12713	10.6885	2.70231	5.78836	24.186	1.39738	1.0461e-07	4.0589e-06	yes
gene-GIB67_040555	GIB67_040555	39430	rna-gnl|WGS:JACGCM|KingUnif10236.1	GO:0005524(ATP binding);GO:0005618(cell wall);GO:0005634(nucleus);GO:0009409(response to cold);GO:0009416(response to light stimulus);GO:0009507(chloroplast);GO:0009535(chloroplast thylakoid membrane);GO:0009570(chloroplast stroma);GO:0009579(thylakoid);GO:0009753(response to jasmonic acid);GO:0009941(chloroplast envelope);GO:0010150(leaf senescence);GO:0010287(plastoglobule);GO:0010319(stromule)…	03010(Ribosome)	K02960	NA	hypothetical protein AQUCO_00300137v1 [Aquilegia coerulea]	NA	21.3078	1.46641	101.678	2.8204	2.19282	2.4562	2.42082	2.60586	1.36578	1.06654e-07	4.13064e-06	yes
gene-GIB67_014552	GIB67_014552	36873	rna-gnl|WGS:JACGCM|KingUnif06901.1	GO:0003674(molecular_function);GO:0005576(extracellular region);GO:0005615(extracellular space);GO:0005618(cell wall);GO:0005794(Golgi apparatus);GO:0005829(cytosol);GO:0009505(plant-type cell wall);GO:0009741(response to brassinosteroid);GO:0048046(apoplast)	NA	NA	NA	Phosphate-induced protein 1 [Macleaya cordata]	NA	32.8319	449.17	240.28	188.275	100.656	166.582	4.91419	11.0765	9.14523	1.08636e-07	4.19973e-06	yes
gene-GIB67_028165	GIB67_028165	41368	rna-gnl|WGS:JACGCM|KingUnif05435.1	GO:0004849(uridine kinase activity);GO:0005829(cytosol);GO:0006206(pyrimidine nucleobase metabolic process);GO:0009507(chloroplast);GO:0043097(pyrimidine nucleoside salvage)	00710(Carbon fixation in photosynthetic organisms)	K00855	EC:2.7.1.19	Phosphoribulokinase [Macleaya cordata]	NA	13.6872	1.32774	69.1172	3.68638	0.286543	2.20558	0.64406	0.801098	0.446188	1.10914e-07	4.27259e-06	yes
gene-GIB67_000866	GIB67_000866	35705	rna-gnl|WGS:JACGCM|KingUnif25166.1	GO:0004601(peroxidase activity);GO:0009505(plant-type cell wall);GO:0009664(plant-type cell wall organization)	00940(Phenylpropanoid biosynthesis)	K00430	EC:1.11.1.7	hypothetical protein DVH24_002747 [Malus domestica]	NA	15.7947	6.87266	3.95458	23.4186	60.6624	98.4107	272.642	285.037	86.6316	1.10924e-07	4.27259e-06	yes
gene-GIB67_039043	GIB67_039043	33888	rna-gnl|WGS:JACGCM|KingUnif10828.1	GO:0003676(nucleic acid binding);GO:0003700(DNA binding transcription factor activity);GO:0005515(protein binding);GO:0005634(nucleus);GO:0006351(transcription, DNA-templated);GO:0006355(regulation of transcription, DNA-templated);GO:0008270(zinc ion binding);GO:0009736(cytokinin-activated signaling pathway);GO:0009740(gibberellic acid mediated signaling pathway);GO:0009873(ethylene-activated sig…	03410(Base excision repair)	K10773	EC:4.2.99.18	zinc finger protein [Macleaya cordata]	NA	0	0.630193	0.099637	4.72081	20.9431	5.91529	8.31912	56.0965	20.6354	1.12151e-07	4.30454e-06	yes
gene-GIB67_005633	GIB67_005633	10395	rna-gnl|WGS:JACGCM|KingUnif25595.1	GO:0005737(cytoplasm);GO:0008270(zinc ion binding);GO:0009735(response to cytokinin);GO:0009809(lignin biosynthetic process);GO:0045551(cinnamyl-alcohol dehydrogenase activity);GO:0048046(apoplast);GO:0052747(sinapyl alcohol dehydrogenase activity);GO:0055114(oxidation-reduction process)	00940(Phenylpropanoid biosynthesis)	K00083	EC:1.1.1.195	putative mannitol dehydrogenase [Cinnamomum micranthum f. kanehirae]	NA	4.71689	0.877698	2.59949	23.5774	58.9446	30.2584	38.3525	37.7067	19.6537	1.12278e-07	4.30454e-06	yes
gene-GIB67_001147	GIB67_001147	20986	rna-gnl|WGS:JACGCM|KingUnif15614.1	GO:0005618(cell wall);GO:0009506(plasmodesma);GO:0010497(plasmodesmata-mediated intercellular transport);GO:0033609(oxalate metabolic process);GO:0046564(oxalate decarboxylase activity);GO:2000280(regulation of root development)	NA	NA	NA	germin-like protein subfamily 2 member 4 [Manihot esculenta]	NA	1.7915	0	0.200694	5.30901	20.26	26.8517	60.7844	82.6467	48.6852	1.12363e-07	4.30454e-06	yes
gene-GIB67_009357	GIB67_009357	15684	rna-gnl|WGS:JACGCM|KingUnif02293.1	NA	NA	NA	NA	hypothetical protein AQUCO_04000085v1 [Aquilegia coerulea]	NA	0	0.15817	0.244858	8.38343	0	22.5584	0	0	0	1.14868e-07	4.39255e-06	yes
gene-GIB67_028756	GIB67_028756	7843	rna-gnl|WGS:JACGCM|KingUnif17410.1	GO:0019915(lipid storage)	NA	NA	NA	Oleosin [Macleaya cordata]	NA	3.25217	7.87024	5.60887	21.4826	7.32746	193.964	2.162	4.54918	1.99861	1.1642e-07	4.4439e-06	yes
gene-GIB67_030532	GIB67_030532	39531	rna-gnl|WGS:JACGCM|KingUnif37699.1	GO:0005829(cytosol);GO:0008171(O-methyltransferase activity);GO:0008757(S-adenosylmethionine-dependent methyltransferase activity);GO:0019438(aromatic compound biosynthetic process)	00940(Phenylpropanoid biosynthesis)	K13066	EC:2.1.1.68	caffeic acid 3-O-methyltransferase 1 [Cinnamomum micranthum f. kanehirae]	NA	0.134586	0	0	10.3054	0	11.3027	0	0	0	1.16711e-07	4.44697e-06	yes
gene-GIB67_000922	GIB67_000922	23334	rna-gnl|WGS:JACGCM|KingUnif09522.1	GO:0004837(tyrosine decarboxylase activity);GO:0005737(cytoplasm);GO:0006520(cellular amino acid metabolic process);GO:0006559(L-phenylalanine catabolic process);GO:0009611(response to wounding);GO:0016740(transferase activity);GO:0016831(carboxy-lyase activity);GO:0030170(pyridoxal phosphate binding);GO:1990055(phenylacetaldehyde synthase activity)	00350(Tyrosine metabolism);00360(Phenylalanine metabolism);00380(Tryptophan metabolism);00901(Indole alkaloid biosynthesis);00950(Isoquinoline alkaloid biosynthesis);00965(Betalain biosynthesis)	K01593	EC:4.1.1.28;EC:4.1.1.105	PREDICTED: tyrosine/DOPA decarboxylase 2-like [Nelumbo nucifera]	NA	0.084949	0.18963	0.863909	8.54983	5.10377	55.2937	0.011247	1.15558	0.033388	1.17443e-07	4.46684e-06	yes
gene-GIB67_021705	GIB67_021705	33495	rna-gnl|WGS:JACGCM|KingUnif14617.1	GO:0005351(carbohydrate:proton symporter activity);GO:0005355(glucose transmembrane transporter activity);GO:0005886(plasma membrane);GO:0015144(carbohydrate transmembrane transporter activity);GO:0016020(membrane);GO:0016021(integral component of membrane);GO:0046323(glucose import)	NA	NA	NA	Sugar/inositol transporter [Macleaya cordata]	NA	19.2546	58.5171	32.1481	4.48904	2.3092	5.52836	11.3919	9.30389	6.42157	1.19176e-07	4.52462e-06	yes
gene-GIB67_025820	GIB67_025820	15359	rna-gnl|WGS:JACGCM|KingUnif07700.1	GO:0000786(nucleosome);GO:0003677(DNA binding);GO:0005634(nucleus);GO:0005794(Golgi apparatus);GO:0005829(cytosol);GO:0006334(nucleosome assembly);GO:0051276(chromosome organization)	NA	NA	NA	hypothetical protein EUGRSUZ_J02062, partial [Eucalyptus grandis]	NA	11.8272	5.06498	2.16715	452.425	12.4773	449.195	82.7089	33.646	17.4025	1.19944e-07	4.54562e-06	yes
gene-GIB67_025125	GIB67_025125	13968	rna-gnl|WGS:JACGCM|KingUnif12874.1	NA	NA	NA	NA		NA	2.00602	6.92815	1.40312	19.3596	33.1192	24.5475	28.5188	38.9155	313.379	1.22052e-07	4.61728e-06	yes
gene-GIB67_018063	GIB67_018063	5676	rna-gnl|WGS:JACGCM|KingUnif38229.1	GO:0003677(DNA binding);GO:0003700(DNA binding transcription factor activity);GO:0005515(protein binding);GO:0005634(nucleus);GO:0006351(transcription, DNA-templated);GO:0006355(regulation of transcription, DNA-templated);GO:0010039(response to iron ion);GO:0034756(regulation of iron ion transport);GO:0046983(protein dimerization activity);GO:0071281(cellular response to iron ion);GO:0071369(cell…	04016(MAPK signaling pathway - plant);04075(Plant hormone signal transduction)	K13422	NA	PREDICTED: transcription factor FER-LIKE IRON DEFICIENCY-INDUCED TRANSCRIPTION FACTOR [Vitis vinifera]	NA	0	0	0	0.107063	0.350922	0.35534	1.47551	6.23858	0.214598	1.2245e-07	4.62407e-06	yes
gene-GIB67_000128	GIB67_000128	31521	rna-gnl|WGS:JACGCM|KingUnif24730.1	GO:0005634(nucleus);GO:0005737(cytoplasm)	00260(Glycine, serine and threonine metabolism);00350(Tyrosine metabolism);00360(Phenylalanine metabolism);00410(beta-Alanine metabolism);00950(Isoquinoline alkaloid biosynthesis);00960(Tropane, piperidine and pyridine alkaloid biosynthesis)	K00276	EC:1.4.3.21	uncharacterized protein LOC110418155 [Herrania umbratica]	NA	1.39751	3.12973	3.62838	0.134431	0.156665	0.167956	0.082333	0.278749	0.20034	1.24875e-07	4.70726e-06	yes
gene-GIB67_018836	GIB67_018836	11839	rna-gnl|WGS:JACGCM|KingUnif19283.1	GO:0005576(extracellular region);GO:0006631(fatty acid metabolic process);GO:0008126(acetylesterase activity);GO:0016042(lipid catabolic process);GO:0052689(carboxylic ester hydrolase activity)	00901(Indole alkaloid biosynthesis)	K21026	EC:3.1.1.80	PREDICTED: GDSL esterase/lipase At3g48460 [Nicotiana tomentosiformis]	NA	0.161033	0	0	7.25025	0.153059	13.0472	0.068968	0.12535	0.109536	1.25756e-07	4.72556e-06	yes
gene-GIB67_041127	GIB67_041127	34137	rna-gnl|WGS:JACGCM|KingUnif15583.1	GO:0016020(membrane);GO:0016709(oxidoreductase activity, acting on paired donors, with incorporation or reduction of molecular oxygen, NAD(P)H as one donor, and incorporation of one atom of oxygen);GO:0044550(secondary metabolite biosynthetic process)	NA	NA	NA	PREDICTED: cytochrome P450 71A1-like [Nelumbo nucifera]	NA	0	0	0	1.27062	0.256226	2.94289	0.465978	0.254141	0.758448	1.25931e-07	4.72556e-06	yes
gene-GIB67_040195	GIB67_040195	18561	rna-gnl|WGS:JACGCM|KingUnif15430.1	GO:0000786(nucleosome);GO:0003677(DNA binding);GO:0005634(nucleus);GO:0006334(nucleosome assembly);GO:0031492(nucleosomal DNA binding)	NA	NA	NA	Histone H3.2 [Zea mays]	NA	4.18821	0.923669	0.496914	585.017	3.13233	169.712	71.7516	32.9281	21.4251	1.2603e-07	4.72556e-06	yes
gene-GIB67_001489	GIB67_001489	20729	rna-gnl|WGS:JACGCM|KingUnif36920.1	GO:0005634(nucleus);GO:0006970(response to osmotic stress);GO:0009651(response to salt stress);GO:0009737(response to abscisic acid);GO:0009738(abscisic acid-activated signaling pathway);GO:0009789(positive regulation of abscisic acid-activated signaling pathway);GO:0045454(cell redox homeostasis)	NA	NA	NA	PREDICTED: TPR repeat-containing thioredoxin TTL1-like [Nelumbo nucifera]	NA	0.297985	0.046911	0.437341	11.274	2.16315	7.70241	1.05956	1.19223	1.14672	1.26644e-07	4.7402e-06	yes
gene-GIB67_027750	GIB67_027750	201	rna-gnl|WGS:JACGCM|KingUnif13196.1	GO:0005634(nucleus);GO:0010088(phloem development);GO:0042803(protein homodimerization activity);GO:0043621(protein self-association)	NA	NA	NA	Sieve element occlusion [Macleaya cordata]	NA	31.0005	72.036	21.5667	2.53645	4.28027	6.35729	4.78515	13.3387	4.63063	1.2799e-07	4.78212e-06	yes
gene-GIB67_011387	GIB67_011387	27705	rna-gnl|WGS:JACGCM|KingUnif21486.1	GO:0005576(extracellular region);GO:0016846(carbon-sulfur lyase activity)	00380(Tryptophan metabolism)	K16903	EC:2.6.1.99	unnamed protein product, partial [Vitis vinifera]	NA	91.036	29.5412	20.9996	5.50599	1.68651	3.51248	72.8223	47.3283	31.2272	1.30689e-07	4.8744e-06	yes
gene-GIB67_008436	GIB67_008436	15058	rna-gnl|WGS:JACGCM|KingUnif07745.1	GO:0009813(flavonoid biosynthetic process);GO:0043231(intracellular membrane-bounded organelle);GO:0052696(flavonoid glucuronidation);GO:0080043(quercetin 3-O-glucosyltransferase activity);GO:0080044(quercetin 7-O-glucosyltransferase activity)	NA	NA	NA	UDP-glucuronosyl/UDP-glucosyltransferase [Macleaya cordata]	NA	0.109197	0.037964	0.729964	4.6643	6.29867	4.41426	16.6368	21.1559	4.47174	1.30924e-07	4.87455e-06	yes
gene-GIB67_004084	GIB67_004084	7496	rna-gnl|WGS:JACGCM|KingUnif14312.1	GO:0005618(cell wall);GO:0033609(oxalate metabolic process);GO:0046564(oxalate decarboxylase activity)	NA	NA	NA	PREDICTED: germin-like protein subfamily T member 2 [Cucumis melo]	NA	0.057068	0.129669	0.527366	4.46473	28.1457	11.1173	2.05396	6.85552	3.9625	1.35246e-07	5.02665e-06	yes
gene-GIB67_040976	GIB67_040976	12420	rna-gnl|WGS:JACGCM|KingUnif11274.1	GO:0000325(plant-type vacuole);GO:0005524(ATP binding);GO:0005774(vacuolar membrane);GO:0005886(plasma membrane);GO:0008559(xenobiotic transmembrane transporting ATPase activity);GO:0016021(integral component of membrane);GO:0042626(ATPase activity, coupled to transmembrane movement of substances);GO:0055085(transmembrane transport)	02010(ABC transporters)	K05666	NA	hypothetical protein C5167_020018 [Papaver somniferum]	NA	0.86605	0.470898	1.73349	3.95053	6.61684	9.88471	17.1283	6.05412	19.2536	1.36079e-07	5.04176e-06	yes
gene-GIB67_035423	GIB67_035423	4259	rna-gnl|WGS:JACGCM|KingUnif15843.1	GO:0005249(voltage-gated potassium channel activity);GO:0005887(integral component of plasma membrane);GO:0042391(regulation of membrane potential)	NA	NA	NA	PREDICTED: potassium channel KAT3 [Nelumbo nucifera]	NA	4.20137	6.79429	5.35428	5.18937	10.314	10.7954	30.3434	27.0531	45.5909	1.36129e-07	5.04176e-06	yes
gene-GIB67_026805	GIB67_026805	22890	rna-gnl|WGS:JACGCM|KingUnif15393.1	GO:0003674(molecular_function);GO:0005634(nucleus);GO:0008150(biological_process)	00350(Tyrosine metabolism);00360(Phenylalanine metabolism);00380(Tryptophan metabolism);00901(Indole alkaloid biosynthesis);00950(Isoquinoline alkaloid biosynthesis);00965(Betalain biosynthesis)	K01593	EC:4.1.1.28;EC:4.1.1.105	hypothetical protein AQUCO_00900784v1 [Aquilegia coerulea]	NA	20.9675	35.3076	18.7824	2.7297	1.22465	3.30163	7.16763	13.7669	8.07245	1.40528e-07	5.19563e-06	yes
gene-GIB67_006399	GIB67_006399	4201	rna-gnl|WGS:JACGCM|KingUnif21012.1	GO:0003677(DNA binding);GO:0003700(DNA binding transcription factor activity);GO:0005634(nucleus);GO:0006351(transcription, DNA-templated);GO:0006355(regulation of transcription, DNA-templated);GO:0009873(ethylene-activated signaling pathway);GO:0010200(response to chitin)	NA	NA	NA	hypothetical protein JCGZ_20463 [Jatropha curcas]	NA	0.867184	1008.2	136.021	71.5392	40.6388	107.764	1.07486	1.29628	2.08016	1.42315e-07	5.25251e-06	yes
gene-GIB67_026697	GIB67_026697	28211	rna-gnl|WGS:JACGCM|KingUnif15518.1	GO:0009813(flavonoid biosynthetic process);GO:0043231(intracellular membrane-bounded organelle);GO:0052696(flavonoid glucuronidation);GO:0080043(quercetin 3-O-glucosyltransferase activity);GO:0080044(quercetin 7-O-glucosyltransferase activity)	00906(Carotenoid biosynthesis)	K14595	EC:2.4.1.263	Scopoletin glucosyltransferase [Actinidia chinensis var. chinensis]	NA	1.00812	0.381255	0.074303	12.0703	7.58275	109.965	40.4795	8.14477	13.2871	1.43324e-07	5.28057e-06	yes
gene-GIB67_040568	GIB67_040568	39440	rna-gnl|WGS:JACGCM|KingUnif23390.1	GO:0000790(nuclear chromatin);GO:0003677(DNA binding);GO:0006342(chromatin silencing)	NA	NA	NA	PREDICTED: histone H2A-like [Malus domestica]	NA	11.6502	4.67919	2.57287	346.102	14.4812	509.018	119.707	51.1987	35.8618	1.46205e-07	5.37735e-06	yes
gene-GIB67_042473	GIB67_042473	28524	rna-gnl|WGS:JACGCM|KingUnif18130.1	NA	NA	NA	NA	PREDICTED: B3 domain-containing protein Os04g0386900-like [Nelumbo nucifera]	NA	27.2795	103.075	87.8489	6.44544	0.133495	13.1922	2.1978	1.73264	2.9174	1.47209e-07	5.4049e-06	yes
gene-GIB67_033074	GIB67_033074	17310	rna-gnl|WGS:JACGCM|KingUnif19596.1	GO:0005515(protein binding);GO:0005634(nucleus);GO:0080113(regulation of seed growth)	NA	NA	NA	transcription factor ILI5-like [Phoenix dactylifera]	NA	0	0	0	2.42247	2.11353	14.6041	12.6487	0.178934	5.41857	1.49359e-07	5.47435e-06	yes
gene-GIB67_005999	GIB67_005999	24953	rna-gnl|WGS:JACGCM|KingUnif27897.1	GO:0009813(flavonoid biosynthetic process);GO:0043231(intracellular membrane-bounded organelle);GO:0052696(flavonoid glucuronidation);GO:0080043(quercetin 3-O-glucosyltransferase activity);GO:0080044(quercetin 7-O-glucosyltransferase activity)	NA	NA	NA	PREDICTED: UDP-glycosyltransferase 91C1-like [Nelumbo nucifera]	NA	2.91942	6.68678	3.03086	9.79767	11.362	44.8937	132.509	30.4351	55.1714	1.50098e-07	5.49194e-06	yes
gene-GIB67_029071	GIB67_029071	14407	rna-gnl|WGS:JACGCM|KingUnif35627.1	GO:0004674(protein serine/threonine kinase activity);GO:0005886(plasma membrane);GO:0006468(protein phosphorylation)	NA	NA	NA	probable receptor-like protein kinase At5g20050 [Hevea brasiliensis]	NA	0	0.025797	0.025708	0.563496	1.08018	1.03905	1.85746	1.88863	0.764759	1.52827e-07	5.58213e-06	yes
gene-GIB67_008271	GIB67_008271	14887	rna-gnl|WGS:JACGCM|KingUnif08876.1	GO:0003674(molecular_function);GO:0005829(cytosol);GO:0009269(response to desiccation);GO:0009611(response to wounding);GO:0009644(response to high light intensity);GO:0009793(embryo development ending in seed dormancy);GO:0050832(defense response to fungus)	NA	NA	NA	PREDICTED: late embryogenesis abundant protein Lea14-A [Nelumbo nucifera]	NA	2.10528	32.158	7.58825	222.902	485.831	373.077	14.985	81.8412	6.91488	1.53221e-07	5.58691e-06	yes
gene-GIB67_041942	GIB67_041942	16325	rna-gnl|WGS:JACGCM|KingUnif18323.1	GO:0019915(lipid storage)	NA	NA	NA	Oleosin [Macleaya cordata]	NA	0	0	0	3.91375	0.092907	7.48199	0	0	0	1.5351e-07	5.58782e-06	yes
gene-GIB67_033438	GIB67_033438	31200	rna-gnl|WGS:JACGCM|KingUnif27655.1	GO:0005515(protein binding)	04144(Endocytosis)	K01528	EC:3.6.5.5	Dynamin central domain [Macleaya cordata]	NA	5.55267	74.8777	31.4318	0.877433	3.16184	1.60507	1.48787	0	0.821329	1.5796e-07	5.73993e-06	yes
gene-GIB67_033470	GIB67_033470	24285	rna-gnl|WGS:JACGCM|KingUnif30409.1	GO:0033809(anthocyanin 6''-O-malonyltransferase activity)	00942(Anthocyanin biosynthesis)	K21383	EC:2.3.1.215	hypothetical protein AQUCO_00800031v1 [Aquilegia coerulea]	NA	0.310706	0.02083	0.238896	5.06794	3.35134	156.245	176.257	32.0079	12.1821	1.63447e-07	5.92915e-06	yes
gene-GIB67_007287	GIB67_007287	5405	rna-gnl|WGS:JACGCM|KingUnif20116.1	GO:0003674(molecular_function);GO:0005739(mitochondrion);GO:0008150(biological_process);GO:0016021(integral component of membrane)	NA	NA	NA	PREDICTED: uncharacterized protein LOC100260477 [Vitis vinifera]	NA	4.46832	2.96719	0.766039	0.991267	1.10325	4.70758	57.0716	12.8807	25.9665	1.72035e-07	6.23001e-06	yes
gene-GIB67_030059	GIB67_030059	17503	rna-gnl|WGS:JACGCM|KingUnif23369.1	GO:0005515(protein binding);GO:0005634(nucleus);GO:0007049(cell cycle);GO:0016538(cyclin-dependent protein serine/threonine kinase regulator activity);GO:0051301(cell division);GO:0051726(regulation of cell cycle)	NA	NA	NA	PREDICTED: G2/mitotic-specific cyclin-2-like [Nelumbo nucifera]	NA	0	0	0	3.57818	0	13.8088	1.13305	0.448204	0.562769	1.73514e-07	6.27285e-06	yes
gene-GIB67_037882	GIB67_037882	35173	rna-gnl|WGS:JACGCM|KingUnif25927.1	GO:0005634(nucleus)	NA	NA	NA	PREDICTED: mitotic checkpoint serine/threonine-protein kinase BUB1 [Nelumbo nucifera]	NA	0	0	0	4.0978	0.03842	3.36362	0.394207	0.154418	0.535152	1.74574e-07	6.30041e-06	yes
gene-GIB67_007898	GIB67_007898	667	rna-gnl|WGS:JACGCM|KingUnif43029.1	GO:0000976(transcription regulatory region sequence-specific DNA binding);GO:0003700(DNA binding transcription factor activity);GO:0005634(nucleus);GO:0032454(histone demethylase activity (H3-K9 specific));GO:0033169(histone H3-K9 demethylation);GO:0042742(defense response to bacterium);GO:2000028(regulation of photoperiodism, flowering)	NA	NA	NA	zinc finger protein [Macleaya cordata]	NA	0	0	0	2.06064	0.365436	0.585407	0.510436	0.561939	0.193833	1.75944e-07	6.33908e-06	yes
gene-GIB67_007360	GIB67_007360	5482	rna-gnl|WGS:JACGCM|KingUnif02283.1	GO:0003700(DNA binding transcription factor activity);GO:0005634(nucleus);GO:0006355(regulation of transcription, DNA-templated)	04933(AGE-RAGE signaling pathway in diabetic complications)	K06236	NA	PREDICTED: myb family transcription factor PHL8-like isoform X3 [Nelumbo nucifera]	NA	2.2389	24.4178	7.36665	0.135891	0.736678	0.221952	0.377537	1.52699	0.409337	1.77003e-07	6.3664e-06	yes
gene-GIB67_019557	GIB67_019557	16564	rna-gnl|WGS:JACGCM|KingUnif26978.1	GO:0016020(membrane);GO:0016709(oxidoreductase activity, acting on paired donors, with incorporation or reduction of molecular oxygen, NAD(P)H as one donor, and incorporation of one atom of oxygen);GO:0044550(secondary metabolite biosynthetic process)	NA	NA	NA	PREDICTED: cytochrome P450 CYP82D47-like [Nelumbo nucifera]	NA	0.63119	0.325637	0.876362	0	0	0	0	0	0	1.7857e-07	6.41189e-06	yes
gene-GIB67_003327	GIB67_003327	1247	rna-gnl|WGS:JACGCM|KingUnif13483.1	GO:0003676(nucleic acid binding);GO:0004527(exonuclease activity);GO:0005622(intracellular);GO:0005634(nucleus);GO:0006364(rRNA processing);GO:0008408(3'-5' exonuclease activity)	NA	NA	NA	PREDICTED: RNA exonuclease 4-like [Nelumbo nucifera]	NA	1.28749	22.9962	13.587	0.385806	0	0	0.429688	0.245422	0.39018	1.79522e-07	6.42932e-06	yes
gene-GIB67_017878	GIB67_017878	21672	rna-gnl|WGS:JACGCM|KingUnif06781.1	GO:0005249(voltage-gated potassium channel activity);GO:0005887(integral component of plasma membrane);GO:0042391(regulation of membrane potential)	NA	NA	NA	hypothetical protein AQUCO_02300056v1 [Aquilegia coerulea]	NA	9.8381	1.49938	4.40105	0.427747	0.351105	0.408673	0.744582	0.451696	0.859701	1.79663e-07	6.42932e-06	yes
gene-GIB67_036508	GIB67_036508	1776	rna-gnl|WGS:JACGCM|KingUnif05612.1	GO:0003677(DNA binding);GO:0003700(DNA binding transcription factor activity);GO:0005634(nucleus);GO:0006351(transcription, DNA-templated);GO:0006355(regulation of transcription, DNA-templated);GO:0010358(leaf shaping);GO:0045893(positive regulation of transcription, DNA-templated);GO:0046872(metal ion binding);GO:0048510(regulation of timing of transition from vegetative to reproductive phase)	NA	NA	NA	PREDICTED: squamosa promoter-binding-like protein 7 [Nelumbo nucifera]	NA	0.1018	0.388831	0.175927	21.5109	0.847521	8.34006	0.332489	0.127811	1.19492	1.81234e-07	6.47461e-06	yes
gene-GIB67_040540	GIB67_040540	39422	rna-gnl|WGS:JACGCM|KingUnif15076.1	GO:0002238(response to molecule of fungal origin);GO:0050474((S)-norcoclaurine synthase activity);GO:1901010((S)-reticuline metabolic process)	NA	NA	NA	Bet v I domain [Macleaya cordata]	NA	11.3855	1.05109	9.08419	204.828	154.439	456.267	25.677	118.875	191.017	1.83177e-07	6.53301e-06	yes
gene-GIB67_004373	GIB67_004373	19756	rna-gnl|WGS:JACGCM|KingUnif26876.1	NA	NA	NA	NA	PREDICTED: uncharacterized protein LOC105034334 [Elaeis guineensis]	NA	9.19144	7.89691	4.98784	10.3889	3.97789	4.58017	39.0313	38.6141	45.3404	1.85266e-07	6.59639e-06	yes
gene-GIB67_007607	GIB67_007607	16014	rna-gnl|WGS:JACGCM|KingUnif28465.1	GO:0005507(copper ion binding);GO:0016722(oxidoreductase activity, oxidizing metal ions)	00053(Ascorbate and aldarate metabolism)	K00423	EC:1.10.3.3	hypothetical protein AQUCO_01400555v1 [Aquilegia coerulea]	NA	0	0	0	0.346831	0.264048	0.53122	2.70984	1.56327	0.742127	1.85884e-07	6.6073e-06	yes
gene-GIB67_029251	GIB67_029251	13711	rna-gnl|WGS:JACGCM|KingUnif26964.1	GO:0005634(nucleus);GO:0005737(cytoplasm);GO:0005829(cytosol);GO:0005983(starch catabolic process);GO:0005986(sucrose biosynthetic process);GO:0006000(fructose metabolic process);GO:0006002(fructose 6-phosphate metabolic process);GO:0006094(gluconeogenesis);GO:0009737(response to abscisic acid);GO:0009750(response to fructose);GO:0015979(photosynthesis);GO:0016311(dephosphorylation);GO:0030388(fr…	00010(Glycolysis / Gluconeogenesis);00030(Pentose phosphate pathway);00051(Fructose and mannose metabolism);00710(Carbon fixation in photosynthetic organisms)	K03841	EC:3.1.3.11	Fructose-1,6-bisphosphatase [Parasponia andersonii]	NA	27.133	48.577	78.7146	7.74892	4.5588	8.36271	7.94728	15.902	6.29537	1.86887e-07	6.63181e-06	yes
gene-GIB67_028602	GIB67_028602	41414	rna-gnl|WGS:JACGCM|KingUnif02499.1	GO:0004674(protein serine/threonine kinase activity);GO:0005515(protein binding);GO:0005524(ATP binding);GO:0005886(plasma membrane);GO:0006468(protein phosphorylation);GO:0007169(transmembrane receptor protein tyrosine kinase signaling pathway);GO:0010082(regulation of root meristem growth);GO:0010449(root meristem growth);GO:0016021(integral component of membrane);GO:0016032(viral process)	NA	NA	NA	Protein kinase domain [Macleaya cordata]	NA	0	0	0	0.230138	0.075601	0.744239	0.392333	0.837998	0.450763	1.90017e-07	6.73164e-06	yes
gene-GIB67_003514	GIB67_003514	23784	rna-gnl|WGS:JACGCM|KingUnif03223.1	GO:0004497(monooxygenase activity)	NA	NA	NA	PREDICTED: cytochrome P450 CYP72A219-like [Gossypium hirsutum]	NA	0.325823	0.430114	1.33287	5.13908	9.75633	101.574	41.3413	47.7173	10.5532	1.91832e-07	6.78457e-06	yes
gene-GIB67_009837	GIB67_009837	33339	rna-gnl|WGS:JACGCM|KingUnif20417.1	GO:0005199(structural constituent of cell wall);GO:0005576(extracellular region);GO:0005618(cell wall);GO:0005634(nucleus);GO:0009860(pollen tube growth);GO:0071555(cell wall organization)	NA	NA	NA	unknown [Zea mays]	NA	0.387228	1.49493	0.928344	21.8699	1.86211	31.1708	1.93448	0.315983	2.11753	1.92341e-07	6.79125e-06	yes
gene-GIB67_034218	GIB67_034218	7207	rna-gnl|WGS:JACGCM|KingUnif18900.1	GO:0008422(beta-glucosidase activity);GO:0009251(glucan catabolic process)	00500(Starch and sucrose metabolism);00460(Cyanoamino acid metabolism);00940(Phenylpropanoid biosynthesis)	K01188	EC:3.2.1.21	Glycoside hydrolase [Macleaya cordata]	NA	0.922683	0.454871	0.4796	9.26981	3.20959	11.031	11.1573	6.0628	8.00432	1.93265e-07	6.80479e-06	yes
gene-GIB67_011011	GIB67_011011	38952	rna-gnl|WGS:JACGCM|KingUnif25827.1	NA	NA	NA	NA	hypothetical protein JCGZ_11546 [Jatropha curcas]	NA	83.5223	4.63851	18.2412	0.268149	0	0	0	2.33436	0.110658	1.93367e-07	6.80479e-06	yes
gene-GIB67_026649	GIB67_026649	10341	rna-gnl|WGS:JACGCM|KingUnif16048.1	GO:0000981(RNA polymerase II transcription factor activity, sequence-specific DNA binding);GO:0001135(transcription factor activity, RNA polymerase II transcription factor recruiting);GO:0003677(DNA binding);GO:0003700(DNA binding transcription factor activity);GO:0005634(nucleus);GO:0006355(regulation of transcription, DNA-templated);GO:0006357(regulation of transcription by RNA polymerase II);G…	NA	NA	NA	Myb_DNA-binding domain-containing protein [Cinnamomum micranthum f. kanehirae]	NA	0	0	0.106416	4.11289	0.43725	7.15379	0.125749	0.122781	0.115047	1.94428e-07	6.83076e-06	yes
gene-GIB67_015134	GIB67_015134	34528	rna-gnl|WGS:JACGCM|KingUnif23901.1	GO:0003674(molecular_function);GO:0005576(extracellular region);GO:0008150(biological_process)	NA	NA	NA	desiccation-related protein PCC13-62 isoform X1 [Cinnamomum micranthum f. kanehirae]	NA	51.8125	11.9417	26.7581	140.83	149.967	260.493	1883.73	251.32	1461.96	2.0183e-07	7.07907e-06	yes
gene-GIB67_014148	GIB67_014148	15257	rna-gnl|WGS:JACGCM|KingUnif43158.1	GO:0005886(plasma membrane);GO:0016020(membrane);GO:0031225(anchored component of membrane);GO:0046658(anchored component of plasma membrane)	NA	NA	NA	PREDICTED: fasciclin-like arabinogalactan protein 7 [Nelumbo nucifera]	NA	11.8953	1.02839	1.0203	40.2811	36.1706	69.2785	244.177	53.2575	215.02	2.04054e-07	7.1357e-06	yes
gene-GIB67_040227	GIB67_040227	18590	rna-gnl|WGS:JACGCM|KingUnif24203.1	GO:0016165(linoleate 13S-lipoxygenase activity)	00591(Linoleic acid metabolism);00592(alpha-Linolenic acid metabolism)	K00454	EC:1.13.11.12	PREDICTED: linoleate 13S-lipoxygenase 2-1, chloroplastic [Nelumbo nucifera]	NA	109.818	1.30654	15.2786	4.71513	2.01793	2.59321	1.21154	1.92416	1.74836	2.04385e-07	7.1357e-06	yes
gene-GIB67_011269	GIB67_011269	13242	rna-gnl|WGS:JACGCM|KingUnif11393.1	GO:0005634(nucleus);GO:0052689(carboxylic ester hydrolase activity)	NA	NA	NA	PREDICTED: probable carboxylesterase 2 [Nelumbo nucifera]	NA	9.57855	17.8502	11.5217	94.0115	151.703	106.618	153.471	82.5345	50.2163	2.04499e-07	7.1357e-06	yes
gene-GIB67_028515	GIB67_028515	42644	rna-gnl|WGS:JACGCM|KingUnif17880.1	NA	NA	NA	NA		NA	0.879964	7.7296	3.29813	0	0	0	0	0	0	2.04791e-07	7.1357e-06	yes
gene-GIB67_009639	GIB67_009639	29839	rna-gnl|WGS:JACGCM|KingUnif11257.1	GO:0005576(extracellular region);GO:0016846(carbon-sulfur lyase activity)	00380(Tryptophan metabolism)	K16903	EC:2.6.1.99	unnamed protein product, partial [Vitis vinifera]	NA	34.4022	126.527	109.14	2.11701	7.93152	11.6993	29.096	19.2634	15.9184	2.11478e-07	7.35658e-06	yes
gene-GIB67_024835	GIB67_024835	4870	rna-gnl|WGS:JACGCM|KingUnif41742.1	GO:0003777(microtubule motor activity);GO:0005871(kinesin complex);GO:0007018(microtubule-based movement);GO:0016887(ATPase activity)	NA	NA	NA	Kinesin [Macleaya cordata]	NA	0.081175	0.076507	0.103504	4.95422	0.160801	4.5545	0.861596	0.570995	0.657564	2.18652e-07	7.59367e-06	yes
gene-GIB67_040189	GIB67_040189	18558	rna-gnl|WGS:JACGCM|KingUnif26014.1	GO:0000786(nucleosome);GO:0003677(DNA binding);GO:0005634(nucleus);GO:0006334(nucleosome assembly);GO:0031492(nucleosomal DNA binding)	NA	NA	NA	Histone H3.2 [Zea mays]	NA	7.5266	1.46758	0.114348	311.675	9.2585	624.229	41.3357	16.9941	5.88513	2.24085e-07	7.76744e-06	yes
gene-GIB67_019139	GIB67_019139	16804	rna-gnl|WGS:JACGCM|KingUnif31388.1	GO:0005886(plasma membrane);GO:0031225(anchored component of membrane);GO:0046658(anchored component of plasma membrane)	NA	NA	NA	fasciclin-like arabinogalactan protein 10 [Ricinus communis]	NA	7.68403	5.68985	2.12562	137.732	16.2072	247.669	68.4754	33.0812	28.704	2.24389e-07	7.76744e-06	yes
gene-GIB67_035652	GIB67_035652	43091	rna-gnl|WGS:JACGCM|KingUnif02422.1	GO:0003723(RNA binding);GO:0005737(cytoplasm);GO:0006351(transcription, DNA-templated);GO:0006355(regulation of transcription, DNA-templated);GO:0010050(vegetative phase change);GO:0010267(production of ta-siRNAs involved in RNA interference);GO:0010599(production of lsiRNA involved in RNA interference);GO:0016246(RNA interference);GO:0035195(gene silencing by miRNA);GO:0035196(production of miRN…	NA	NA	NA	Argonaute/Dicer protein [Macleaya cordata]	NA	0	0	0	0.344551	0.067855	0.774085	0.484562	0.371597	0.541125	2.28237e-07	7.88215e-06	yes
gene-GIB67_001099	GIB67_001099	23504	rna-gnl|WGS:JACGCM|KingUnif16566.1	GO:0005515(protein binding);GO:0005737(cytoplasm);GO:0031463(Cul3-RING ubiquitin ligase complex);GO:0043161(proteasome-mediated ubiquitin-dependent protein catabolic process)	NA	NA	NA	BTB/POZ domain-containing protein [Vitis vinifera]	NA	4.92579	26.8976	23.5017	1.95878	2.09893	2.18771	2.81834	3.27178	2.71368	2.28447e-07	7.88215e-06	yes
gene-GIB67_040453	GIB67_040453	39343	rna-gnl|WGS:JACGCM|KingUnif14064.1	GO:0003677(DNA binding);GO:0003700(DNA binding transcription factor activity);GO:0005634(nucleus);GO:0006351(transcription, DNA-templated);GO:0006355(regulation of transcription, DNA-templated);GO:0046872(metal ion binding)	NA	NA	NA	hypothetical protein AQUCO_00300022v1 [Aquilegia coerulea]	NA	40.4413	68.5648	38.988	10.4784	4.33216	9.52662	4.58064	10.2723	8.46372	2.30216e-07	7.93028e-06	yes
gene-GIB67_018680	GIB67_018680	31458	rna-gnl|WGS:JACGCM|KingUnif08999.1	GO:0005887(integral component of plasma membrane);GO:0009705(plant-type vacuole membrane);GO:0009992(cellular water homeostasis);GO:0015250(water channel activity);GO:0015254(glycerol channel activity);GO:0034220(ion transmembrane transport);GO:0042807(central vacuole)	NA	NA	NA	Major intrinsic protein [Macleaya cordata]	NA	8.60735	19.1473	2.17251	19.628	63.2823	161.067	481.495	126.632	411.564	2.32552e-07	7.99776e-06	yes
gene-GIB67_000911	GIB67_000911	23316	rna-gnl|WGS:JACGCM|KingUnif13693.1	GO:0005783(endoplasmic reticulum);GO:0005887(integral component of plasma membrane);GO:0019829(cation-transporting ATPase activity)	NA	NA	NA	Cation-transporting P-type ATPase [Macleaya cordata]	NA	19.2408	44.8484	48.6621	10.2778	8.50393	9.72483	4.17076	6.65633	6.50143	2.37406e-07	8.15145e-06	yes
gene-GIB67_000409	GIB67_000409	20288	rna-gnl|WGS:JACGCM|KingUnif30251.1	GO:0004497(monooxygenase activity);GO:0005783(endoplasmic reticulum);GO:0007275(multicellular organism development);GO:0010268(brassinosteroid homeostasis);GO:0016125(sterol metabolic process);GO:0016132(brassinosteroid biosynthetic process)	NA	NA	NA	cytochrome P450 87A3-like [Manihot esculenta]	NA	3.52849	0.06003	0.431137	49.7915	56.7765	357.924	189.975	108.451	61.6424	2.38408e-07	8.16953e-06	yes
gene-GIB67_026925	GIB67_026925	3709	rna-gnl|WGS:JACGCM|KingUnif32329.1	GO:0004553(hydrolase activity, hydrolyzing O-glycosyl compounds);GO:0030247(polysaccharide binding);GO:0046658(anchored component of plasma membrane)	00500(Starch and sucrose metabolism)	K19891	EC:3.2.1.39	hypothetical protein AQUCO_02800029v1 [Aquilegia coerulea]	NA	0.182506	0	0	10.5511	0.894017	42.1148	8.79329	6.12819	6.40273	2.38704e-07	8.16953e-06	yes
gene-GIB67_017144	GIB67_017144	12364	rna-gnl|WGS:JACGCM|KingUnif39081.1	GO:0004185(serine-type carboxypeptidase activity);GO:0005773(vacuole);GO:0051603(proteolysis involved in cellular protein catabolic process)	NA	NA	NA	Peptidase S10 [Macleaya cordata]	NA	11.6667	7.63015	21.2373	0.854955	1.22311	1.28462	4.02685	0.580354	1.73222	2.41357e-07	8.24703e-06	yes
gene-GIB67_006577	GIB67_006577	36135	rna-gnl|WGS:JACGCM|KingUnif33584.1	GO:0006970(response to osmotic stress);GO:0009414(response to water deprivation);GO:0009507(chloroplast);GO:0009535(chloroplast thylakoid membrane);GO:0009570(chloroplast stroma);GO:0009688(abscisic acid biosynthetic process);GO:0042538(hyperosmotic salinity response);GO:0045549(9-cis-epoxycarotenoid dioxygenase activity);GO:0046872(metal ion binding);GO:0055114(oxidation-reduction process)	00906(Carotenoid biosynthesis)	K09840	EC:1.13.11.51	PREDICTED: 9-cis-epoxycarotenoid dioxygenase NCED6, chloroplastic-like [Nelumbo nucifera]	NA	0	0	0	2.49989	0	4.4334	0.032417	0	0	2.42492e-07	8.27247e-06	yes
gene-GIB67_010183	GIB67_010183	12944	rna-gnl|WGS:JACGCM|KingUnif08718.1	GO:0005773(vacuole);GO:0005774(vacuolar membrane);GO:0006508(proteolysis);GO:0006751(glutathione catabolic process);GO:0006805(xenobiotic metabolic process);GO:0009636(response to toxic substance);GO:0016021(integral component of membrane);GO:0016756(glutathione gamma-glutamylcysteinyltransferase activity);GO:0036374(glutathione hydrolase activity);GO:0102953(hypoglycin A gamma-glutamyl transpept…	00590(Arachidonic acid metabolism);00430(Taurine and hypotaurine metabolism);00460(Cyanoamino acid metabolism);00480(Glutathione metabolism)	K18592	EC:2.3.2.2;EC:3.4.19.13	hypothetical protein AQUCO_02000381v1 [Aquilegia coerulea]	NA	15.0299	25.6909	39.434	4.37556	2.31992	2.82895	4.69133	10.1545	3.53469	2.48394e-07	8.46017e-06	yes
gene-GIB67_016058	GIB67_016058	40573	rna-gnl|WGS:JACGCM|KingUnif25379.1	GO:0000981(RNA polymerase II transcription factor activity, sequence-specific DNA binding);GO:0001135(transcription factor activity, RNA polymerase II transcription factor recruiting);GO:0003677(DNA binding);GO:0003700(DNA binding transcription factor activity);GO:0005634(nucleus);GO:0006355(regulation of transcription, DNA-templated);GO:0006357(regulation of transcription by RNA polymerase II);G…	NA	NA	NA	hypothetical protein AQUCO_03000294v1 [Aquilegia coerulea]	NA	0.064906	0	0	0.208412	0.23992	0.10335	1.21989	6.82086	1.57617	2.49357e-07	8.47935e-06	yes
gene-GIB67_042883	GIB67_042883	22924	rna-gnl|WGS:JACGCM|KingUnif17519.1	NA	NA	NA	NA		NA	0.177222	0.220649	0.159627	1.32562	1.81203	2.46332	7.56571	14.5467	5.07992	2.49848e-07	8.48241e-06	yes
gene-GIB67_016498	GIB67_016498	26186	rna-gnl|WGS:JACGCM|KingUnif12767.1	GO:0004842(ubiquitin-protein transferase activity);GO:0005576(extracellular region);GO:0005886(plasma membrane);GO:0008270(zinc ion binding);GO:0009814(defense response, incompatible interaction);GO:0009816(defense response to bacterium, incompatible interaction);GO:0010200(response to chitin);GO:0016021(integral component of membrane);GO:0016567(protein ubiquitination);GO:0043161(proteasome-medi…	NA	NA	NA	RING-H2 finger protein ATL11-like [Carica papaya]	NA	41.5111	1.86457	1.69524	0	0.294751	0.143847	0.40356	0.899831	0.901028	2.52223e-07	8.54935e-06	yes
gene-GIB67_042017	GIB67_042017	4554	rna-gnl|WGS:JACGCM|KingUnif41632.1	GO:0003700(DNA binding transcription factor activity);GO:0005634(nucleus);GO:0006355(regulation of transcription, DNA-templated);GO:0008356(asymmetric cell division);GO:0009630(gravitropism);GO:0009956(radial pattern formation);GO:0043565(sequence-specific DNA binding);GO:0048366(leaf development);GO:0051457(maintenance of protein location in nucleus);GO:0090610(bundle sheath cell fate specificat…	04075(Plant hormone signal transduction)	K14494	NA	Transcription factor GRAS [Macleaya cordata]	NA	0.127473	0.494329	0.368317	7.71413	1.05897	16.1804	1.48861	1.18956	0.760392	2.56624e-07	8.68465e-06	yes
gene-GIB67_001162	GIB67_001162	35504	rna-gnl|WGS:JACGCM|KingUnif21406.1	GO:0004672(protein kinase activity);GO:0004674(protein serine/threonine kinase activity);GO:0005515(protein binding);GO:0005524(ATP binding);GO:0005886(plasma membrane);GO:0006468(protein phosphorylation);GO:0010067(procambium histogenesis);GO:0010087(phloem or xylem histogenesis);GO:0010089(xylem development);GO:0010223(secondary shoot formation);GO:0016021(integral component of membrane);GO:005…	NA	NA	NA	hypothetical protein AQUCO_03500148v1 [Aquilegia coerulea]	NA	1.62792	0.575635	0.695967	4.31891	1.87699	8.3095	17.589	32.5096	4.7432	2.57144e-07	8.68835e-06	yes
gene-GIB67_036813	GIB67_036813	30203	rna-gnl|WGS:JACGCM|KingUnif05985.1	GO:0003700(DNA binding transcription factor activity);GO:0005515(protein binding);GO:0005634(nucleus);GO:0006351(transcription, DNA-templated);GO:0006355(regulation of transcription, DNA-templated);GO:0009733(response to auxin);GO:0010078(maintenance of root meristem identity);GO:0043565(sequence-specific DNA binding);GO:1902459(positive regulation of stem cell population maintenance)	03013(RNA transport)	K14292	EC:2.1.1.-	hypothetical protein AQUCO_00400311v1 [Aquilegia coerulea]	NA	0.223748	0	0	2.65252	5.2637	2.98932	9.68271	7.62437	6.73102	2.57847e-07	8.69822e-06	yes
gene-GIB67_032199	GIB67_032199	17816	rna-gnl|WGS:JACGCM|KingUnif36514.1	GO:0005515(protein binding)	NA	NA	NA	floral homeotic protein AGAMOUS-like isoform X2 [Papaver somniferum]	NA	0	0	0	0.278207	0.266559	0.345861	1.65105	1.34146	1.45463	2.59426e-07	8.73757e-06	yes
gene-GIB67_007988	GIB67_007988	41879	rna-gnl|WGS:JACGCM|KingUnif30156.1	GO:0004866(endopeptidase inhibitor activity);GO:0005576(extracellular region);GO:0005618(cell wall);GO:0048046(apoplast)	NA	NA	NA	Proteinase inhibitor I3 [Macleaya cordata]	NA	122.178	62.221	250.794	30.4715	17.271	26.7058	151.639	794.067	300.163	2.63376e-07	8.85655e-06	yes
gene-GIB67_023471	GIB67_023471	940	rna-gnl|WGS:JACGCM|KingUnif27914.1	GO:0003674(molecular_function);GO:0008150(biological_process);GO:0009507(chloroplast);GO:0016021(integral component of membrane)	NA	NA	NA	protein GPR107-like [Papaver somniferum]	NA	18.0491	0.396675	52.967	0.716081	0.313521	0.669459	2.74754	0.718356	0.494298	2.70043e-07	9.06635e-06	yes
gene-GIB67_020260	GIB67_020260	3113	rna-gnl|WGS:JACGCM|KingUnif39597.1	GO:0005737(cytoplasm);GO:0016740(transferase activity);GO:0016747(transferase activity, transferring acyl groups other than amino-acyl groups)	00942(Anthocyanin biosynthesis)	K21383	EC:2.3.1.215	hypothetical protein AQUCO_00800031v1 [Aquilegia coerulea]	NA	0.12307	0.484855	0	5.09263	7.90641	38.3668	32.1781	18.4299	5.61434	2.82362e-07	9.46492e-06	yes
gene-GIB67_042997	GIB67_042997	6844	rna-gnl|WGS:JACGCM|KingUnif21190.1	GO:0005737(cytoplasm)	NA	NA	NA	GDP-fucose protein O-fucosyltransferase [Macleaya cordata]	NA	17.0251	29.3581	97.9527	27.2169	44.171	52.7829	2.88151	5.2086	3.22993	2.86155e-07	9.57693e-06	yes
gene-GIB67_003553	GIB67_003553	23817	rna-gnl|WGS:JACGCM|KingUnif20044.1	GO:0004866(endopeptidase inhibitor activity);GO:0005576(extracellular region);GO:0005618(cell wall);GO:0048046(apoplast)	NA	NA	NA	Proteinase inhibitor I3 [Macleaya cordata]	NA	124.031	62.1151	254.663	30.9089	17.5319	26.9767	153.567	811.446	305.23	2.89169e-07	9.66254e-06	yes
gene-GIB67_016538	GIB67_016538	7815	rna-gnl|WGS:JACGCM|KingUnif25073.1	GO:0005634(nucleus);GO:0005737(cytoplasm)	NA	NA	NA	PREDICTED: U-box domain-containing protein 19-like [Nelumbo nucifera]	NA	6.89188	319.185	43.9006	20.1014	19.033	19.3952	2.53129	5.35352	1.33034	2.90552e-07	9.69345e-06	yes
gene-GIB67_016716	GIB67_016716	33376	rna-gnl|WGS:JACGCM|KingUnif31030.1	GO:0003677(DNA binding);GO:0003700(DNA binding transcription factor activity);GO:0005515(protein binding);GO:0005634(nucleus);GO:0006351(transcription, DNA-templated);GO:0009651(response to salt stress);GO:0009733(response to auxin);GO:0009739(response to gibberellin);GO:0009751(response to salicylic acid);GO:0009753(response to jasmonic acid);GO:0046686(response to cadmium ion)	NA	NA	NA	hypothetical protein AQUCO_02600199v1 [Aquilegia coerulea]	NA	20.1026	40.7277	26.2932	3.87982	1.22144	7.33379	2.58734	0.87009	4.10695	2.99066e-07	9.96182e-06	yes
gene-GIB67_023170	GIB67_023170	24674	rna-gnl|WGS:JACGCM|KingUnif42709.1	GO:0003677(DNA binding);GO:0003700(DNA binding transcription factor activity);GO:0005515(protein binding);GO:0005634(nucleus);GO:0006351(transcription, DNA-templated);GO:0006355(regulation of transcription, DNA-templated);GO:0009409(response to cold);GO:0009414(response to water deprivation);GO:0009631(cold acclimation)	NA	NA	NA	PREDICTED: dehydration-responsive element-binding protein 1F-like [Nelumbo nucifera]	NA	0.545003	599.114	92.306	184.265	154.135	98.203	0.349447	1.11124	1.34772	3.02306e-07	1.00539e-05	yes
gene-GIB67_019261	GIB67_019261	16923	rna-gnl|WGS:JACGCM|KingUnif10907.1	GO:0003677(DNA binding);GO:0003700(DNA binding transcription factor activity);GO:0005634(nucleus);GO:0006351(transcription, DNA-templated);GO:0006355(regulation of transcription, DNA-templated);GO:0009873(ethylene-activated signaling pathway);GO:0019760(glucosinolate metabolic process);GO:0043565(sequence-specific DNA binding);GO:0044212(transcription regulatory region DNA binding);GO:0045893(pos…	NA	NA	NA	ethylene-responsive transcription factor ERF026-like [Hevea brasiliensis]	NA	0.675281	927.008	194.344	193.985	235.236	209.173	1.28164	2.15908	1.40909	3.04358e-07	1.00937e-05	yes
gene-GIB67_013346	GIB67_013346	32089	rna-gnl|WGS:JACGCM|KingUnif38318.1	GO:0005576(extracellular region);GO:0006869(lipid transport);GO:0008289(lipid binding);GO:0051707(response to other organism)	NA	NA	NA	PREDICTED: putative lipid-transfer protein DIR1 [Juglans regia]	NA	1.08357	0	0.494757	219.472	5.84773	273.878	14.9622	0.99561	50.4716	3.04456e-07	1.00937e-05	yes
gene-GIB67_029883	GIB67_029883	19899	rna-gnl|WGS:JACGCM|KingUnif15954.1	GO:0005737(cytoplasm);GO:0005739(mitochondrion);GO:0007568(aging);GO:0008794(arsenate reductase (glutaredoxin) activity);GO:0030611(arsenate reductase activity);GO:0055114(oxidation-reduction process);GO:0071722(detoxification of arsenic-containing substance)	NA	NA	NA	Rhodanese-like domain [Macleaya cordata]	NA	0	0	0.070786	1.06272	2.8927	5.5223	0	0	0	3.05289e-07	1.01055e-05	yes
gene-GIB67_038794	GIB67_038794	28723	rna-gnl|WGS:JACGCM|KingUnif15447.1	NA	NA	NA	NA	hypothetical protein AQUCO_01100120v1 [Aquilegia coerulea]	NA	123.674	196.939	82.3953	11.7651	37.398	4.07913	0.821285	7.196	11.0813	3.08929e-07	1.02101e-05	yes
gene-GIB67_030106	GIB67_030106	40363	rna-gnl|WGS:JACGCM|KingUnif23434.1	GO:0005634(nucleus);GO:0005737(cytoplasm)	NA	NA	NA	hypothetical protein BVC80_659g19 [Macleaya cordata]	NA	68.9188	139.203	46.726	4.30868	3.98738	1.93783	3.88581	39.4782	2.6427	3.11859e-07	1.02909e-05	yes
gene-GIB67_017312	GIB67_017312	14733	rna-gnl|WGS:JACGCM|KingUnif12927.1	NA	NA	NA	NA	Uncharacterized protein TCM_029139 [Theobroma cacao]	NA	57.1669	188.528	227.662	9.46078	16.5154	19.9489	49.3488	72.8186	54.8599	3.15428e-07	1.03925e-05	yes
gene-GIB67_022225	GIB67_022225	26535	rna-gnl|WGS:JACGCM|KingUnif13331.1	GO:0005634(nucleus);GO:0005783(endoplasmic reticulum);GO:0007275(multicellular organism development);GO:0010073(meristem maintenance);GO:0016491(oxidoreductase activity)	NA	NA	NA	PREDICTED: retinol dehydrogenase 12-like [Nelumbo nucifera]	NA	0.213082	0	0	1.18746	1.75145	15.1416	18.7907	11.3699	21.3084	3.19513e-07	1.05107e-05	yes
gene-GIB67_018354	GIB67_018354	22257	rna-gnl|WGS:JACGCM|KingUnif42503.1	GO:0030599(pectinesterase activity);GO:0046910(pectinesterase inhibitor activity);GO:0071944(cell periphery)	00040(Pentose and glucuronate interconversions)	K01051	EC:3.1.1.11	PREDICTED: probable pectinesterase/pectinesterase inhibitor 51 [Nelumbo nucifera]	NA	3.21864	0.448012	0.251963	49.0764	14.7318	53.9056	30.8153	13.3415	20.4855	3.20198e-07	1.05169e-05	yes
gene-GIB67_033361	GIB67_033361	31123	rna-gnl|WGS:JACGCM|KingUnif06620.1	GO:0004601(peroxidase activity);GO:0009505(plant-type cell wall);GO:0009664(plant-type cell wall organization)	00940(Phenylpropanoid biosynthesis)	K00430	EC:1.11.1.7	PREDICTED: peroxidase 24 [Eucalyptus grandis]	NA	0.178912	0.480023	0.897261	7.87644	1.41655	115.643	28.2653	26.8549	285.865	3.22916e-07	1.05898e-05	yes
gene-GIB67_005882	GIB67_005882	24821	rna-gnl|WGS:JACGCM|KingUnif19594.1	GO:0005432(calcium:sodium antiporter activity);GO:0005509(calcium ion binding);GO:0055074(calcium ion homeostasis)	NA	NA	NA	PREDICTED: uncharacterized protein LOC104613163 [Nelumbo nucifera]	NA	0.802644	0.863521	1.42911	4.51387	9.55653	7.49264	10.0249	9.72915	13.6515	3.43229e-07	1.12385e-05	yes
gene-GIB67_031353	GIB67_031353	2383	rna-gnl|WGS:JACGCM|KingUnif07976.1	GO:0004601(peroxidase activity);GO:0009505(plant-type cell wall);GO:0009664(plant-type cell wall organization)	00940(Phenylpropanoid biosynthesis)	K00430	EC:1.11.1.7	PREDICTED: peroxidase 5-like [Fragaria vesca subsp. vesca]	NA	0	0.025887	0.101465	0.206913	23.3125	7.33708	5.41858	5.41302	6.39995	3.44276e-07	1.12554e-05	yes
gene-GIB67_042381	GIB67_042381	10873	rna-gnl|WGS:JACGCM|KingUnif10699.1	GO:0004185(serine-type carboxypeptidase activity);GO:0005773(vacuole);GO:0051603(proteolysis involved in cellular protein catabolic process)	NA	NA	NA	Peptidase S10 [Macleaya cordata]	NA	7.13423	5.61365	16.3815	0.623467	1.45888	1.01164	1.85142	0.338005	0.394806	3.45117e-07	1.12655e-05	yes
gene-GIB67_036725	GIB67_036725	30113	rna-gnl|WGS:JACGCM|KingUnif31599.1	GO:0003876(AMP deaminase activity);GO:0005515(protein binding);GO:0005524(ATP binding);GO:0005634(nucleus);GO:0005783(endoplasmic reticulum);GO:0005829(cytosol);GO:0009168(purine ribonucleoside monophosphate biosynthetic process);GO:0009737(response to abscisic acid);GO:0009793(embryo development ending in seed dormancy);GO:0031307(integral component of mitochondrial outer membrane);GO:0032264(IM…	00230(Purine metabolism)	K01490	EC:3.5.4.6	hypothetical protein AQUCO_00400396v1 [Aquilegia coerulea]	NA	14.1325	12.0458	18.324	2.8988	1.3207	3.71024	1.63944	3.1232	2.45322	3.4641e-07	1.12903e-05	yes
gene-GIB67_004270	GIB67_004270	19663	rna-gnl|WGS:JACGCM|KingUnif25240.1	GO:0005618(cell wall);GO:0009506(plasmodesma);GO:0010497(plasmodesmata-mediated intercellular transport);GO:0033609(oxalate metabolic process);GO:0046564(oxalate decarboxylase activity);GO:2000280(regulation of root development)	NA	NA	NA	germin-like protein subfamily 2 member 4 [Manihot esculenta]	NA	3.7221	0.05819	0.479691	5.51731	30.1932	35.9423	90.5038	161.139	37.6222	3.5323e-07	1.14949e-05	yes
gene-GIB67_014141	GIB67_014141	15256	rna-gnl|WGS:JACGCM|KingUnif41795.1	NA	NA	NA	NA		NA	15.6654	9.53943	13.6539	0.186134	0	0.545943	0.153554	0.86024	0.359337	3.55249e-07	1.15429e-05	yes
gene-GIB67_010932	GIB67_010932	27361	rna-gnl|WGS:JACGCM|KingUnif30913.1	GO:0005507(copper ion binding);GO:0016722(oxidoreductase activity, oxidizing metal ions)	NA	NA	NA	hypothetical protein AQUCO_03100063v1 [Aquilegia coerulea]	NA	46.0274	63.5998	36.2357	6.71052	8.88201	7.24932	7.51366	19.4461	10.588	3.59747e-07	1.16711e-05	yes
gene-GIB67_032747	GIB67_032747	18069	rna-gnl|WGS:JACGCM|KingUnif09746.1	GO:0003700(DNA binding transcription factor activity);GO:0003723(RNA binding);GO:0005515(protein binding);GO:0005634(nucleus);GO:0005737(cytoplasm);GO:0006355(regulation of transcription, DNA-templated);GO:0009691(cytokinin biosynthetic process);GO:0009934(regulation of meristem structural organization);GO:0015630(microtubule cytoskeleton);GO:0019827(stem cell population maintenance);GO:0042803(p…	NA	NA	NA	homeobox protein SBH1-like [Quercus suber]	NA	0	0	0	1.46735	1.08616	9.69924	4.16296	1.76022	3.91964	3.61626e-07	1.17139e-05	yes
gene-GIB67_007632	GIB67_007632	16043	rna-gnl|WGS:JACGCM|KingUnif36768.1	GO:0003674(molecular_function);GO:0008150(biological_process);GO:0009507(chloroplast)	NA	NA	NA	PAR1-like protein [Cinnamomum micranthum f. kanehirae]	NA	5.82172	3.91721	2.56169	0.398514	0.713216	0.327916	0.313635	0.025779	0.211554	3.6217e-07	1.17139e-05	yes
gene-GIB67_000363	GIB67_000363	34034	rna-gnl|WGS:JACGCM|KingUnif12077.1	GO:0003677(DNA binding);GO:0003700(DNA binding transcription factor activity);GO:0005515(protein binding);GO:0005622(intracellular);GO:0005634(nucleus);GO:0006351(transcription, DNA-templated);GO:0006355(regulation of transcription, DNA-templated);GO:0006952(defense response);GO:0009873(ethylene-activated signaling pathway)	NA	NA	NA	ethylene-responsive transcription factor 12 [Sesamum indicum]	NA	0.295368	4.19038	0.074031	152.49	33.5911	42.7468	5.30362	16.1946	3.88878	3.68248e-07	1.18923e-05	yes
gene-GIB67_034544	GIB67_034544	617	rna-gnl|WGS:JACGCM|KingUnif29211.1	GO:0005634(nucleus);GO:0005737(cytoplasm);GO:0009055(electron transfer activity);GO:0015035(protein disulfide oxidoreductase activity);GO:0045454(cell redox homeostasis);GO:0046872(metal ion binding);GO:0051537(2 iron, 2 sulfur cluster binding)	NA	NA	NA	hypothetical protein C5167_014379 [Papaver somniferum]	NA	3.31234	18.2537	7.5458	1.03143	0.215838	0.275904	0.507919	0.548535	0.146766	3.68848e-07	1.18935e-05	yes
gene-GIB67_005767	GIB67_005767	42839	rna-gnl|WGS:JACGCM|KingUnif42942.1	GO:0008270(zinc ion binding);GO:0016021(integral component of membrane);GO:0016567(protein ubiquitination);GO:0046872(metal ion binding)	NA	NA	NA	PREDICTED: RING-H2 finger protein ATL57-like [Nelumbo nucifera]	NA	1.41206	0.229317	0.040994	3.90076	2.74248	2.25127	28.3433	12.5872	17.7206	3.70964e-07	1.19331e-05	yes
gene-GIB67_009428	GIB67_009428	15753	rna-gnl|WGS:JACGCM|KingUnif12222.1	NA	NA	NA	NA	RecName: Full=Metallothionein-like protein type 2	NA	1.69351	3.10304	0.590495	0.477268	1.60055	2.06575	12.9553	5.41383	102.348	3.71252e-07	1.19331e-05	yes
gene-GIB67_031626	GIB67_031626	29571	rna-gnl|WGS:JACGCM|KingUnif31572.1	GO:0005886(plasma membrane);GO:0016324(apical plasma membrane);GO:0051819(induction by symbiont of nodulation, tumor or growth in host)	NA	NA	NA	PREDICTED: flotillin-like protein 4 [Vitis vinifera]	NA	2.07407	12.1052	8.18999	0.913551	0.290443	0.462128	0.551474	0.949823	0.790944	3.71765e-07	1.19331e-05	yes
gene-GIB67_011609	GIB67_011609	9130	rna-gnl|WGS:JACGCM|KingUnif38712.1	GO:0005507(copper ion binding);GO:0009505(plant-type cell wall);GO:0009506(plasmodesma);GO:0016722(oxidoreductase activity, oxidizing metal ions)	NA	NA	NA	Multicopper oxidase [Macleaya cordata]	NA	7.5843	11.9965	46.0001	138.145	111.594	179.588	16.3951	18.9201	13.0583	3.73029e-07	1.19555e-05	yes
gene-GIB67_035495	GIB67_035495	4331	rna-gnl|WGS:JACGCM|KingUnif20879.1	GO:0003674(molecular_function);GO:0005634(nucleus);GO:0005829(cytosol);GO:0019005(SCF ubiquitin ligase complex);GO:0030162(regulation of proteolysis);GO:0031625(ubiquitin protein ligase binding);GO:0043161(proteasome-mediated ubiquitin-dependent protein catabolic process);GO:0080037(negative regulation of cytokinin-activated signaling pathway);GO:2000762(regulation of phenylpropanoid metabolic pr…	NA	NA	NA	PREDICTED: F-box/kelch-repeat protein At1g15670-like [Nelumbo nucifera]	NA	2.1839	0.376793	1.63333	4.84081	10.8299	5.55769	16.2146	22.1842	26.8947	3.75067e-07	1.199e-05	yes
gene-GIB67_000413	GIB67_000413	20291	rna-gnl|WGS:JACGCM|KingUnif01969.1	GO:0003863(3-methyl-2-oxobutanoate dehydrogenase (2-methylpropanoyl-transferring) activity);GO:0005739(mitochondrion);GO:0005759(mitochondrial matrix);GO:0016624(oxidoreductase activity, acting on the aldehyde or oxo group of donors, disulfide as acceptor);GO:0046872(metal ion binding);GO:0055114(oxidation-reduction process)	00640(Propanoate metabolism);00280(Valine, leucine and isoleucine degradation)	K00166	EC:1.2.4.4	hypothetical protein AQUCO_01400349v1 [Aquilegia coerulea]	NA	0.211242	0	0.058076	2.29448	3.34855	21.0346	14.5375	14.829	2.57734	3.75235e-07	1.199e-05	yes
gene-GIB67_011131	GIB67_011131	835	rna-gnl|WGS:JACGCM|KingUnif06586.1	GO:0005515(protein binding);GO:0005634(nucleus);GO:0006351(transcription, DNA-templated);GO:0045892(negative regulation of transcription, DNA-templated)	00970(Aminoacyl-tRNA biosynthesis)	K01870	EC:6.1.1.5	hypothetical protein AQUCO_00100477v1 [Aquilegia coerulea]	NA	0	0.06342	0	0.585477	0.071629	1.72391	6.58936	7.0347	2.18456	3.76081e-07	1.19989e-05	yes
gene-GIB67_040611	GIB67_040611	25841	rna-gnl|WGS:JACGCM|KingUnif07308.1	GO:0004864(protein phosphatase inhibitor activity);GO:0005634(nucleus);GO:0005737(cytoplasm);GO:0009738(abscisic acid-activated signaling pathway);GO:0010427(abscisic acid binding);GO:0080163(regulation of protein serine/threonine phosphatase activity)	04016(MAPK signaling pathway - plant);04075(Plant hormone signal transduction)	K14496	NA	abscisic acid receptor PYR1-like isoform X2 [Papaver somniferum]	NA	2.16743	5.02932	2.6037	3.82708	1.49089	4.75518	35.0821	22.5206	15.4085	3.77648e-07	1.20308e-05	yes
gene-GIB67_012700	GIB67_012700	11252	rna-gnl|WGS:JACGCM|KingUnif06413.1	GO:0005215(transporter activity);GO:0005886(plasma membrane);GO:0006807(nitrogen compound metabolic process);GO:0006857(oligopeptide transport);GO:0009506(plasmodesma);GO:0015031(protein transport);GO:0016020(membrane);GO:0016021(integral component of membrane);GO:0022857(transmembrane transporter activity);GO:0042937(tripeptide transmembrane transporter activity);GO:0042938(dipeptide transport);…	NA	NA	NA	Proton-dependent oligopeptide transporter family [Macleaya cordata]	NA	31.7106	200.142	181.716	4.52476	4.12857	11.9683	9.85844	44.0945	5.65044	3.80089e-07	1.20904e-05	yes
gene-GIB67_017833	GIB67_017833	33348	rna-gnl|WGS:JACGCM|KingUnif35366.1	GO:0004620(phospholipase activity);GO:0005737(cytoplasm);GO:0016020(membrane);GO:0047372(acylglycerol lipase activity)	NA	NA	NA	hypothetical protein AQUCO_01500169v1 [Aquilegia coerulea]	NA	9.12769	21.444	18.0998	26.2585	40.4075	55.2052	92.3047	181.664	125.389	3.83823e-07	1.21909e-05	yes
gene-GIB67_033913	GIB67_033913	12502	rna-gnl|WGS:JACGCM|KingUnif23762.1	GO:0005737(cytoplasm);GO:0006596(polyamine biosynthetic process);GO:0010487(thermospermine synthase activity)	NA	NA	NA	Spermidine/spermine synthases family [Macleaya cordata]	NA	0.27875	0	0.032609	6.65819	3.19389	33.395	18.398	17.9467	2.381	3.86894e-07	1.227e-05	yes
gene-GIB67_024731	GIB67_024731	13282	rna-gnl|WGS:JACGCM|KingUnif15998.1	GO:0003677(DNA binding);GO:0005515(protein binding);GO:0009507(chloroplast);GO:0009534(chloroplast thylakoid);GO:0009535(chloroplast thylakoid membrane);GO:0009658(chloroplast organization);GO:0009706(chloroplast inner membrane);GO:0009941(chloroplast envelope);GO:0015979(photosynthesis);GO:0015995(chlorophyll biosynthetic process);GO:0046872(metal ion binding);GO:0048529(magnesium-protoporphyrin…	00860(Porphyrin and chlorophyll metabolism)	K04035	EC:1.14.13.81	hypothetical protein AQUCO_01400927v1 [Aquilegia coerulea]	NA	35.8179	52.3104	84.929	23.3506	1.8875	30.1619	3.00556	1.18637	3.43468	4.0425e-07	1.28013e-05	yes
gene-GIB67_032953	GIB67_032953	17180	rna-gnl|WGS:JACGCM|KingUnif01976.1	GO:0005515(protein binding);GO:0005576(extracellular region);GO:0005886(plasma membrane);GO:0009651(response to salt stress);GO:0009737(response to abscisic acid);GO:0009739(response to gibberellin);GO:0009740(gibberellic acid mediated signaling pathway);GO:2000377(regulation of reactive oxygen species metabolic process)	NA	NA	NA	hypothetical protein AQUCO_02500217v1 [Aquilegia coerulea]	NA	2.97112	0	1.33154	881.368	14.06	735.754	8.29602	29.0292	190.862	4.23346e-07	1.3386e-05	yes
gene-GIB67_008226	GIB67_008226	14840	rna-gnl|WGS:JACGCM|KingUnif00641.1	GO:0009699(phenylpropanoid biosynthetic process);GO:0042349(guiding stereospecific synthesis activity)	NA	NA	NA	Plant disease resistance response protein [Macleaya cordata]	NA	0	0	0	0	0.258451	0.659624	3.99223	22.6319	1.19433	4.40075e-07	1.38781e-05	yes
gene-GIB67_036724	GIB67_036724	30114	rna-gnl|WGS:JACGCM|KingUnif25087.1	GO:0000139(Golgi membrane);GO:0005634(nucleus);GO:0005794(Golgi apparatus);GO:0009409(response to cold);GO:0009414(response to water deprivation);GO:0009651(response to salt stress);GO:0016021(integral component of membrane);GO:0016413(O-acetyltransferase activity);GO:0045492(xylan biosynthetic process);GO:0045893(positive regulation of transcription, DNA-templated);GO:0050826(response to freezin…	NA	NA	NA	hypothetical protein AQUCO_00400394v1 [Aquilegia coerulea]	NA	1.98509	1.2792	0.885861	0.810359	1.57336	2.40149	11.6295	11.8467	9.03595	4.40222e-07	1.38781e-05	yes
gene-GIB67_023048	GIB67_023048	37225	rna-gnl|WGS:JACGCM|KingUnif21119.1	GO:0003924(GTPase activity);GO:0005509(calcium ion binding);GO:0005525(GTP binding);GO:0005739(mitochondrion);GO:0005829(cytosol);GO:0007005(mitochondrion organization);GO:0009793(embryo development ending in seed dormancy);GO:0009860(pollen tube growth);GO:0031307(integral component of mitochondrial outer membrane)	NA	NA	NA	Small GTPase superfamily [Macleaya cordata]	NA	0	0.015813	0	0.137546	0.217055	0.165962	1.23474	0.371927	1.67319	4.50487e-07	1.41806e-05	yes
gene-GIB67_003512	GIB67_003512	23783	rna-gnl|WGS:JACGCM|KingUnif15399.1	NA	NA	NA	NA		NA	0	0	0	0.3624	0.55644	3.64214	7.70694	0.660184	6.35611	4.55408e-07	1.43143e-05	yes
gene-GIB67_024741	GIB67_024741	13295	rna-gnl|WGS:JACGCM|KingUnif26704.1	GO:0004674(protein serine/threonine kinase activity);GO:0005886(plasma membrane);GO:0007166(cell surface receptor signaling pathway)	NA	NA	NA	PREDICTED: putative wall-associated receptor kinase-like 16 [Nelumbo nucifera]	NA	2.41796	0	10.9983	0.040995	0	0	0.041238	0.045287	0.059588	4.64688e-07	1.45843e-05	yes
gene-GIB67_028135	GIB67_028135	41337	rna-gnl|WGS:JACGCM|KingUnif04946.1	GO:0005506(iron ion binding);GO:0009507(chloroplast);GO:0009534(chloroplast thylakoid);GO:0009535(chloroplast thylakoid membrane);GO:0009941(chloroplast envelope);GO:0016021(integral component of membrane);GO:0046872(metal ion binding)	NA	NA	NA	hypothetical protein AQUCO_00500643v1 [Aquilegia coerulea]	NA	9.12145	0.498412	26.2262	1.65008	0.396057	0.853281	0.347089	0.285485	0.605175	4.67819e-07	1.46609e-05	yes
gene-GIB67_040058	GIB67_040058	18427	rna-gnl|WGS:JACGCM|KingUnif35759.1	GO:0003674(molecular_function);GO:0005618(cell wall);GO:0005886(plasma membrane);GO:0008150(biological_process);GO:0009507(chloroplast)	03008(Ribosome biogenesis in eukaryotes);04712(Circadian rhythm - plant)	K03097	EC:2.7.11.1	PREDICTED: uncharacterized protein LOC104597377 [Nelumbo nucifera]	NA	1.2474	0.418076	0.279238	64.51	1.21168	200.643	7.60502	1.6851	32.8958	4.74951e-07	1.48624e-05	yes
gene-GIB67_010458	GIB67_010458	25281	rna-gnl|WGS:JACGCM|KingUnif35328.1	GO:0005515(protein binding);GO:0005516(calmodulin binding);GO:0005634(nucleus);GO:0009414(response to water deprivation);GO:0009651(response to salt stress);GO:0010337(regulation of salicylic acid metabolic process)	NA	NA	NA	VQ [Macleaya cordata]	NA	15.4595	75.3472	61.9707	250.572	147.205	95.2637	10.116	22.4043	8.8803	4.77408e-07	1.49173e-05	yes
gene-GIB67_011005	GIB67_011005	38944	rna-gnl|WGS:JACGCM|KingUnif15395.1	GO:0016791(phosphatase activity)	00750(Vitamin B6 metabolism)	K13248	EC:3.1.3.74	Phosphatase PHOSPHO-type [Macleaya cordata]	NA	32.6082	70.8181	65.4597	1.61898	5.08833	2.82662	11.2325	42.8218	4.91959	4.78862e-07	1.49406e-05	yes
gene-GIB67_012653	GIB67_012653	11208	rna-gnl|WGS:JACGCM|KingUnif30014.1	GO:0003677(DNA binding);GO:0003700(DNA binding transcription factor activity);GO:0005634(nucleus);GO:0006351(transcription, DNA-templated);GO:0006355(regulation of transcription, DNA-templated);GO:0007275(multicellular organism development)	03013(RNA transport);03015(mRNA surveillance pathway);03018(RNA degradation)	K13126	NA	NAC domain-containing protein 46-like [Coffea arabica]	NA	0	0	0	0.291118	0.23192	0.529391	0.380298	3.34323	2.48152	4.84208e-07	1.50653e-05	yes
gene-GIB67_006350	GIB67_006350	4153	rna-gnl|WGS:JACGCM|KingUnif22232.1	GO:0004034(aldose 1-epimerase activity);GO:0005634(nucleus);GO:0005975(carbohydrate metabolic process);GO:0006012(galactose metabolic process);GO:0047938(glucose-6-phosphate 1-epimerase activity)	00010(Glycolysis / Gluconeogenesis)	K01792	EC:5.1.3.15	Glucose-6-phosphate 1-epimerase [Actinidia chinensis var. chinensis]	NA	4.33697	6.40914	13.3824	33.1168	36.0925	49.8157	6.09705	7.66647	3.10155	4.84281e-07	1.50653e-05	yes
gene-GIB67_022175	GIB67_022175	18150	rna-gnl|WGS:JACGCM|KingUnif02345.1	GO:0005829(cytosol);GO:0009611(response to wounding);GO:0016787(hydrolase activity);GO:0046872(metal ion binding)	NA	NA	NA	PREDICTED: nudix hydrolase 8-like [Nelumbo nucifera]	NA	4.78063	10.3102	24.0896	0	0.211045	0.149929	0.199479	1.26027	0	5.01825e-07	1.55882e-05	yes
gene-GIB67_004304	GIB67_004304	19691	rna-gnl|WGS:JACGCM|KingUnif30148.1	GO:0004650(polygalacturonase activity);GO:0005576(extracellular region);GO:0005618(cell wall);GO:0008150(biological_process);GO:0048046(apoplast)	NA	NA	NA	BURP domain [Macleaya cordata]	NA	0	0	0	1.09963	0.371706	3.65617	0.359501	0.145526	0	5.09611e-07	1.58069e-05	yes
gene-GIB67_008250	GIB67_008250	14864	rna-gnl|WGS:JACGCM|KingUnif03362.1	GO:0004568(chitinase activity);GO:0005576(extracellular region);GO:0006032(chitin catabolic process);GO:0008061(chitin binding)	00520(Amino sugar and nucleotide sugar metabolism)	K01183	EC:3.2.1.14	Glycoside hydrolase [Macleaya cordata]	NA	56.5309	1.35888	21.978	0.277139	0.274536	0.489618	3.67701	291.261	6.91202	5.13817e-07	1.59141e-05	yes
gene-GIB67_020985	GIB67_020985	716	rna-gnl|WGS:JACGCM|KingUnif12937.1	GO:0016020(membrane);GO:0016709(oxidoreductase activity, acting on paired donors, with incorporation or reduction of molecular oxygen, NAD(P)H as one donor, and incorporation of one atom of oxygen);GO:0044550(secondary metabolite biosynthetic process)	00460(Cyanoamino acid metabolism)	K13029	EC:1.14.14.37	Cytochrome P450 [Macleaya cordata]	NA	0.018327	0	0	0	0	0	0.68765	4.30482	2.98705	5.18672e-07	1.6041e-05	yes
gene-GIB67_036721	GIB67_036721	30111	rna-gnl|WGS:JACGCM|KingUnif00865.1	NA	NA	NA	NA		NA	0.21407	0.345263	0.136061	54.1404	0	55.3559	0.081839	0.802666	0	5.2525e-07	1.62207e-05	yes
gene-GIB67_029892	GIB67_029892	19903	rna-gnl|WGS:JACGCM|KingUnif22420.1	NA	NA	NA	NA	hypothetical protein AQUCO_03700093v1 [Aquilegia coerulea]	NA	22.5977	3.51373	11.165	145.07	105.55	139.378	140.301	128.671	79.442	5.29046e-07	1.63104e-05	yes
gene-GIB67_038334	GIB67_038334	43165	rna-gnl|WGS:JACGCM|KingUnif31120.1	GO:0005515(protein binding);GO:0005829(cytosol);GO:0006006(glucose metabolic process);GO:0006096(glycolytic process);GO:0009409(response to cold);GO:0009416(response to light stimulus);GO:0009507(chloroplast);GO:0009535(chloroplast thylakoid membrane);GO:0009570(chloroplast stroma);GO:0009744(response to sucrose);GO:0009941(chloroplast envelope);GO:0010319(stromule);GO:0016020(membrane);GO:001925…	00710(Carbon fixation in photosynthetic organisms)	K05298	EC:1.2.1.13	Glyceraldehyde 3-phosphate dehydrogenase [Macleaya cordata]	NA	46.844	0.753997	79.6512	7.91311	0.655373	3.94372	0.798021	0.956582	1.22249	5.29694e-07	1.63104e-05	yes
gene-GIB67_026268	GIB67_026268	37799	rna-gnl|WGS:JACGCM|KingUnif36717.1	GO:0003674(molecular_function);GO:0005634(nucleus);GO:0008150(biological_process)	NA	NA	NA	PREDICTED: uncharacterized protein LOC104596812 [Nelumbo nucifera]	NA	0.724514	0	0	12.9678	32.1587	21.0653	42.3267	27.0073	8.34167	5.39702e-07	1.65945e-05	yes
gene-GIB67_030251	GIB67_030251	20977	rna-gnl|WGS:JACGCM|KingUnif12896.1	GO:0000977(RNA polymerase II regulatory region sequence-specific DNA binding);GO:0005515(protein binding);GO:0005794(Golgi apparatus);GO:0005886(plasma membrane);GO:0009832(plant-type cell wall biogenesis);GO:0009833(plant-type primary cell wall biogenesis);GO:0009834(plant-type secondary cell wall biogenesis);GO:0009863(salicylic acid mediated signaling pathway);GO:0009867(jasmonic acid mediated…	NA	NA	NA	PREDICTED: cellulose synthase A catalytic subunit 4 [UDP-forming] [Nelumbo nucifera]	NA	0.432655	0.383667	0.424634	0.940421	0.830393	1.61063	3.47103	3.82409	5.83455	5.40961e-07	1.66091e-05	yes
gene-GIB67_028686	GIB67_028686	13140	rna-gnl|WGS:JACGCM|KingUnif04187.1	GO:0005515(protein binding)	00195(Photosynthesis)	K02641	EC:1.18.1.2	Oxidoreductase FAD/NAD(P)-binding [Macleaya cordata]	NA	78.6235	43.5115	198.94	22.5636	7.98283	24.0048	16.0476	14.086	12.9178	5.58039e-07	1.71086e-05	yes
gene-GIB67_001158	GIB67_001158	35498	rna-gnl|WGS:JACGCM|KingUnif17028.1	GO:0003824(catalytic activity);GO:0004084(branched-chain-amino-acid transaminase activity);GO:0005829(cytosol);GO:0009082(branched-chain amino acid biosynthetic process);GO:0009097(isoleucine biosynthetic process);GO:0009098(leucine biosynthetic process);GO:0009099(valine biosynthetic process);GO:0009507(chloroplast);GO:0009570(chloroplast stroma);GO:0052654(L-leucine transaminase activity);GO:00…	00270(Cysteine and methionine metabolism);00280(Valine, leucine and isoleucine degradation);00290(Valine, leucine and isoleucine biosynthesis);00770(Pantothenate and CoA biosynthesis)	K00826	EC:2.6.1.42	branched-chain-amino-acid aminotransferase 2, chloroplastic-like protein isoform X1 [Cinnamomum micranthum f. kanehirae]	NA	3.81992	1.48929	1.71657	7.98912	2.84886	2.26495	0	0	0	5.63475e-07	1.72503e-05	yes
gene-GIB67_041525	GIB67_041525	19952	rna-gnl|WGS:JACGCM|KingUnif22008.1	GO:0000981(RNA polymerase II transcription factor activity, sequence-specific DNA binding);GO:0001135(transcription factor activity, RNA polymerase II transcription factor recruiting);GO:0003677(DNA binding);GO:0003700(DNA binding transcription factor activity);GO:0005515(protein binding);GO:0005634(nucleus);GO:0006351(transcription, DNA-templated);GO:0006355(regulation of transcription, DNA-temp…	NA	NA	NA	PREDICTED: myb-related protein Zm38-like [Nelumbo nucifera]	NA	0	0	0	0.174623	0.656117	5.30338	0.986708	1.73663	0.383	5.65162e-07	1.7277e-05	yes
gene-GIB67_025672	GIB67_025672	38288	rna-gnl|WGS:JACGCM|KingUnif35106.1	NA	NA	NA	NA	uncharacterized protein LOC113325847 [Papaver somniferum]	NA	0.370438	0.048997	4.21835	0.389901	0.090902	0.143552	0	0	0	5.73676e-07	1.7512e-05	yes
gene-GIB67_019788	GIB67_019788	21823	rna-gnl|WGS:JACGCM|KingUnif30977.1	GO:0005515(protein binding);GO:0005634(nucleus);GO:0005737(cytoplasm);GO:0007049(cell cycle);GO:0010332(response to gamma radiation);GO:0016538(cyclin-dependent protein serine/threonine kinase regulator activity);GO:0051301(cell division);GO:0051726(regulation of cell cycle)	NA	NA	NA	PREDICTED: G2/mitotic-specific cyclin S13-7-like [Nelumbo nucifera]	NA	0.203717	0	0	23.6331	0.210863	55.4376	4.51172	1.07472	2.06871	5.81776e-07	1.77337e-05	yes
gene-GIB67_020529	GIB67_020529	9183	rna-gnl|WGS:JACGCM|KingUnif40434.1	GO:0005634(nucleus);GO:0007049(cell cycle);GO:0008283(cell proliferation);GO:0010374(stomatal complex development);GO:0010389(regulation of G2/M transition of mitotic cell cycle);GO:0016538(cyclin-dependent protein serine/threonine kinase regulator activity);GO:0051301(cell division);GO:0051726(regulation of cell cycle)	NA	NA	NA	Cyclin [Macleaya cordata]	NA	0	0	0	5.72622	0.161131	8.83441	0	0.275281	0	5.87345e-07	1.78777e-05	yes
gene-GIB67_037470	GIB67_037470	17117	rna-gnl|WGS:JACGCM|KingUnif29414.1	GO:0003674(molecular_function);GO:0008150(biological_process);GO:0009507(chloroplast);GO:0016021(integral component of membrane)	NA	NA	NA	LOW QUALITY PROTEIN: protein GPR107-like, partial [Carica papaya]	NA	8.55736	0.631648	33.0162	0.1637	0.573917	0.351363	0.89009	0.441202	0.469092	5.91527e-07	1.79792e-05	yes
gene-GIB67_016696	GIB67_016696	33360	rna-gnl|WGS:JACGCM|KingUnif36111.1	GO:0004252(serine-type endopeptidase activity);GO:0016485(protein processing)	NA	NA	NA	RHOMBOID-like protein 9, chloroplastic isoform X1 [Hevea brasiliensis]	NA	23.3086	23.3969	46.7908	8.16426	2.7521	5.9361	4.38439	2.12655	5.26841	6.05248e-07	1.83699e-05	yes
gene-GIB67_040219	GIB67_040219	18589	rna-gnl|WGS:JACGCM|KingUnif33302.1	GO:0005737(cytoplasm)	NA	NA	NA	PREDICTED: uncharacterized protein At1g04910 [Vitis vinifera]	NA	37.5126	52.0179	127.703	46.0766	24.5	36.216	8.14522	7.54227	6.35351	6.12328e-07	1.8555e-05	yes
gene-GIB67_026173	GIB67_026173	28035	rna-gnl|WGS:JACGCM|KingUnif32747.1	GO:0004222(metalloendopeptidase activity);GO:0005524(ATP binding);GO:0006508(proteolysis);GO:0009507(chloroplast);GO:0009534(chloroplast thylakoid);GO:0016021(integral component of membrane)	NA	NA	NA	PREDICTED: uncharacterized protein LOC104600018 [Nelumbo nucifera]	NA	3.00639	0	6.35001	0.092403	0.093566	0.241515	0	0	0	6.131e-07	1.8555e-05	yes
gene-GIB67_006319	GIB67_006319	2612	rna-gnl|WGS:JACGCM|KingUnif08162.1	GO:0000154(rRNA modification);GO:0030515(snoRNA binding);GO:0031428(box C/D snoRNP complex);GO:0032040(small-subunit processome)	NA	NA	NA	Cellulose synthase [Macleaya cordata]	NA	6.79969	1.13741	1.61581	8.70309	18.9333	51.5117	89.0486	65.0326	38.5891	6.16148e-07	1.86207e-05	yes
gene-GIB67_001410	GIB67_001410	14136	rna-gnl|WGS:JACGCM|KingUnif40457.1	GO:0003677(DNA binding);GO:0003700(DNA binding transcription factor activity);GO:0005515(protein binding);GO:0005634(nucleus);GO:0006351(transcription, DNA-templated);GO:0006355(regulation of transcription, DNA-templated);GO:0009845(seed germination);GO:0043565(sequence-specific DNA binding);GO:0044212(transcription regulatory region DNA binding);GO:0046982(protein heterodimerization activity)	NA	NA	NA	Basic-leucine zipper domain [Macleaya cordata]	NA	1.9946	1.1043	4.24302	3.9149	3.3064	28.8864	135.547	40.5712	28.0868	6.2199e-07	1.87705e-05	yes
gene-GIB67_023379	GIB67_023379	34854	rna-gnl|WGS:JACGCM|KingUnif07227.1	GO:0005215(transporter activity);GO:0005315(inorganic phosphate transmembrane transporter activity);GO:0005524(ATP binding);GO:0005774(vacuolar membrane);GO:0005886(plasma membrane);GO:0016887(ATPase activity);GO:0035435(phosphate ion transmembrane transport)	02010(ABC transporters)	K05658	EC:3.6.3.44	hypothetical protein AQUCO_09600050v1, partial [Aquilegia coerulea]	NA	36.7534	65.3768	31.7007	0.5587	2.23585	1.52822	5.54662	30.2555	1.38943	6.25773e-07	1.88578e-05	yes
gene-GIB67_008256	GIB67_008256	14873	rna-gnl|WGS:JACGCM|KingUnif26389.1	GO:0003674(molecular_function);GO:0005634(nucleus);GO:0005886(plasma membrane);GO:0009738(abscisic acid-activated signaling pathway)	NA	NA	NA	Membrane-associated kinase regulator 6, partial [Actinidia chinensis var. chinensis]	NA	1.47616	9.44833	3.29776	0.212032	0.285644	0.176057	0.049416	0.051711	0.444746	6.31427e-07	1.90011e-05	yes
gene-GIB67_015662	GIB67_015662	6361	rna-gnl|WGS:JACGCM|KingUnif26873.1	GO:0004197(cysteine-type endopeptidase activity);GO:0004843(thiol-dependent ubiquitin-specific protease activity);GO:0005634(nucleus);GO:0006511(ubiquitin-dependent protein catabolic process);GO:0016579(protein deubiquitination)	NA	NA	NA	PREDICTED: ubiquitin carboxyl-terminal hydrolase 9-like isoform X2 [Elaeis guineensis]	NA	2.84826	0.30115	0.216352	0.578903	0.387206	0.538802	0	0	0	6.36448e-07	1.91029e-05	yes
gene-GIB67_040836	GIB67_040836	2882	rna-gnl|WGS:JACGCM|KingUnif01789.1	GO:0005634(nucleus);GO:0007049(cell cycle);GO:0051301(cell division)	NA	NA	NA	Tetratricopeptide repeat-containing domain [Macleaya cordata]	NA	0.075475	0	0	4.6253	0.048642	19.4103	0.729854	0.301304	0.314039	6.36612e-07	1.91029e-05	yes
gene-GIB67_011056	GIB67_011056	38990	rna-gnl|WGS:JACGCM|KingUnif14210.1	GO:0005576(extracellular region);GO:0005615(extracellular space);GO:0009690(cytokinin metabolic process);GO:0009823(cytokinin catabolic process);GO:0016614(oxidoreductase activity, acting on CH-OH group of donors);GO:0019139(cytokinin dehydrogenase activity);GO:0050660(flavin adenine dinucleotide binding);GO:0055114(oxidation-reduction process)	00908(Zeatin biosynthesis)	K00279	EC:1.5.99.12	hypothetical protein AQUCO_00700318v1 [Aquilegia coerulea]	NA	9.24576	1.06007	6.00992	7.69269	3.76821	45.2515	211.861	134.463	49.0097	6.41212e-07	1.92137e-05	yes
gene-GIB67_030035	GIB67_030035	17472	rna-gnl|WGS:JACGCM|KingUnif09257.1	GO:0003674(molecular_function);GO:0005575(cellular_component);GO:0006400(tRNA modification);GO:0008150(biological_process)	NA	NA	NA	queuosine salvage protein-like [Papaver somniferum]	NA	0	0	0	7.13397	0	8.01522	0.212758	0.717239	0.306207	6.48545e-07	1.9406e-05	yes
gene-GIB67_005716	GIB67_005716	42792	rna-gnl|WGS:JACGCM|KingUnif40408.1	GO:0005576(extracellular region);GO:0016042(lipid catabolic process);GO:0016298(lipase activity);GO:0052689(carboxylic ester hydrolase activity)	00561(Glycerolipid metabolism)	K00679	EC:2.3.1.158	hypothetical protein AQUCO_00901045v1 [Aquilegia coerulea]	NA	0	0	0	2.50384	0	3.44095	0	0	0	6.65973e-07	1.98993e-05	yes
gene-GIB67_005155	GIB67_005155	8526	rna-gnl|WGS:JACGCM|KingUnif00197.1	GO:0000226(microtubule cytoskeleton organization);GO:0003729(mRNA binding);GO:0005200(structural constituent of cytoskeleton);GO:0005618(cell wall);GO:0005737(cytoplasm);GO:0005774(vacuolar membrane);GO:0005829(cytosol);GO:0005886(plasma membrane);GO:0007017(microtubule-based process);GO:0009507(chloroplast);GO:0009570(chloroplast stroma);GO:0045298(tubulin complex);GO:0046686(response to cadmium…	04145(Phagosome)	K07374	NA	alpha-tubulin 1 [Salix arbutifolia]	NA	0.037195	0	0	2.05247	1.44435	3.20285	0.508005	0.144714	0.551963	6.70991e-07	2.00167e-05	yes
gene-GIB67_038921	GIB67_038921	32363	rna-gnl|WGS:JACGCM|KingUnif00230.1	GO:0003677(DNA binding);GO:0004386(helicase activity);GO:0005524(ATP binding);GO:0005634(nucleus);GO:0005654(nucleoplasm);GO:0005730(nucleolus);GO:0031047(gene silencing by RNA)	03440(Homologous recombination)	K10875	EC:3.6.4.-	SNF2-related [Macleaya cordata]	NA	0.861174	0.607949	0.056131	5.15333	3.18393	6.523	9.5758	13.0836	8.81677	6.71789e-07	2.00167e-05	yes
gene-GIB67_038079	GIB67_038079	29247	rna-gnl|WGS:JACGCM|KingUnif01238.1	GO:0003674(molecular_function);GO:0008150(biological_process);GO:0009507(chloroplast)	NA	NA	NA	Protein of unknown function DUF3754 [Macleaya cordata]	NA	2.03711	1.27198	7.59477	0.124055	0.07874	0.354705	0.201037	0.397125	0.05489	6.92487e-07	2.06044e-05	yes
gene-GIB67_004487	GIB67_004487	19872	rna-gnl|WGS:JACGCM|KingUnif30189.1	GO:0009507(chloroplast);GO:0009523(photosystem II);GO:0009533(chloroplast stromal thylakoid);GO:0009535(chloroplast thylakoid membrane);GO:0010205(photoinhibition);GO:0015979(photosynthesis);GO:0016021(integral component of membrane);GO:0030095(chloroplast photosystem II);GO:0030145(manganese ion binding);GO:0045454(cell redox homeostasis)	00195(Photosynthesis)	K02723	NA	Photosystem II PsbY [Macleaya cordata]	NA	89.2895	63.7189	179.239	44.1863	5.39525	46.4834	8.12062	2.79322	8.40555	6.98914e-07	2.07665e-05	yes
gene-GIB67_031765	GIB67_031765	5741	rna-gnl|WGS:JACGCM|KingUnif37774.1	GO:0003677(DNA binding);GO:0005634(nucleus);GO:0008150(biological_process);GO:0046983(protein dimerization activity)	NA	NA	NA	uncharacterized protein LOC105420984 [Amborella trichopoda]	NA	0	0	0	1.305	0.095161	0.569539	0.034267	0	0.112079	7.10475e-07	2.10804e-05	yes
gene-GIB67_001294	GIB67_001294	33810	rna-gnl|WGS:JACGCM|KingUnif24579.1	GO:0000347(THO complex);GO:0003677(DNA binding);GO:0003678(DNA helicase activity);GO:0005515(protein binding);GO:0005524(ATP binding);GO:0005634(nucleus);GO:0005737(cytoplasm);GO:0005829(cytosol);GO:0006268(DNA unwinding involved in DNA replication);GO:0006270(DNA replication initiation);GO:0006351(transcription, DNA-templated);GO:0006355(regulation of transcription, DNA-templated);GO:0007049(cel…	03030(DNA replication)	K02210	EC:3.6.4.12	PREDICTED: DNA replication licensing factor MCM7 [Nelumbo nucifera]	NA	0.087503	0.221544	0.210566	8.32005	0.794173	10.7979	0.48217	1.30258	0.912587	7.17136e-07	2.12483e-05	yes
gene-GIB67_041187	GIB67_041187	34181	rna-gnl|WGS:JACGCM|KingUnif01526.1	GO:0005829(cytosol);GO:0008171(O-methyltransferase activity);GO:0008757(S-adenosylmethionine-dependent methyltransferase activity);GO:0019438(aromatic compound biosynthetic process)	00940(Phenylpropanoid biosynthesis)	K13066	EC:2.1.1.68	Caffeic Acid5-Hydroxyferulic Acid 35-O-Methyltransferase [Populus tomentosa]	NA	0.15015	0	0.18418	4.20201	5.17244	6.38111	3.10196	23.081	2.31687	7.19139e-07	2.12555e-05	yes
gene-GIB67_030034	GIB67_030034	17474	rna-gnl|WGS:JACGCM|KingUnif03318.1	GO:0000786(nucleosome);GO:0003677(DNA binding);GO:0005634(nucleus);GO:0006334(nucleosome assembly);GO:0031492(nucleosomal DNA binding)	NA	NA	NA	Histone H3.2 [Zea mays]	NA	13.6785	4.13928	1.48284	408.102	13.7835	291.716	69.5539	38.1719	18.0928	7.19387e-07	2.12555e-05	yes
gene-GIB67_025515	GIB67_025515	48	rna-gnl|WGS:JACGCM|KingUnif23430.1	GO:0000977(RNA polymerase II regulatory region sequence-specific DNA binding);GO:0003677(DNA binding);GO:0003700(DNA binding transcription factor activity);GO:0005634(nucleus);GO:0009555(pollen development);GO:0045893(positive regulation of transcription, DNA-templated)	04141(Protein processing in endoplasmic reticulum)	K04374	NA	hypothetical protein GOBAR_DD36215 [Gossypium barbadense]	NA	0	0	0	7.94043	0.198871	5.06651	0	0.376615	0.680786	7.24569e-07	2.13788e-05	yes
gene-GIB67_026260	GIB67_026260	37788	rna-gnl|WGS:JACGCM|KingUnif06213.1	GO:0005634(nucleus);GO:0005886(plasma membrane);GO:0016301(kinase activity);GO:0016310(phosphorylation)	NA	NA	NA	PREDICTED: uncharacterized protein LOC104596840 [Nelumbo nucifera]	NA	0.103648	0.022203	0.058902	3.18837	0.383025	6.015	1.45494	1.11646	1.93388	7.35544e-07	2.16725e-05	yes
gene-GIB67_006728	GIB67_006728	29423	rna-gnl|WGS:JACGCM|KingUnif39241.1	GO:0005575(cellular_component);GO:0008757(S-adenosylmethionine-dependent methyltransferase activity);GO:0010341(gibberellin carboxyl-O-methyltransferase activity);GO:0032259(methylation);GO:0046872(metal ion binding);GO:0102118(gibberellin A4 carboxyl methyltransferase activity)	NA	NA	NA	SAM dependent carboxyl methyltransferase [Macleaya cordata]	NA	8.38483	102.783	44.0347	2.06281	1.88696	7.49172	1.18085	8.62352	3.38879	7.47008e-07	2.19797e-05	yes
gene-GIB67_018911	GIB67_018911	40273	rna-gnl|WGS:JACGCM|KingUnif30672.1	GO:0005886(plasma membrane);GO:0009506(plasmodesma);GO:0016020(membrane);GO:0016021(integral component of membrane);GO:0022857(transmembrane transporter activity);GO:0055085(transmembrane transport)	NA	NA	NA	Xanthine/uracil/vitamin C permease [Macleaya cordata]	NA	0	0.043377	0.100849	1.77336	0.877814	1.65673	2.67621	1.78849	5.79301	7.5405e-07	2.21561e-05	yes
gene-GIB67_021101	GIB67_021101	14244	rna-gnl|WGS:JACGCM|KingUnif11518.1	GO:0046658(anchored component of plasma membrane)	NA	NA	NA	hypothetical protein AQUCO_04700074v1 [Aquilegia coerulea]	NA	9.69767	17.3201	16.445	0.387629	0.900699	1.17824	2.73215	7.91507	3.10144	7.67941e-07	2.2533e-05	yes
gene-GIB67_042289	GIB67_042289	36349	rna-gnl|WGS:JACGCM|KingUnif19599.1	GO:0005737(cytoplasm);GO:0016491(oxidoreductase activity);GO:0055114(oxidation-reduction process)	NA	NA	NA	PREDICTED: 2-alkenal reductase (NADP(+)-dependent) [Vitis vinifera]	NA	52.5648	58.4054	81.0582	88.8933	119.576	13.4085	5.80776	6.20609	5.93639	7.7692e-07	2.2754e-05	yes
gene-GIB67_005524	GIB67_005524	10638	rna-gnl|WGS:JACGCM|KingUnif08548.1	GO:0016787(hydrolase activity)	NA	NA	NA	epoxide hydrolase 4 isoform X2 [Herrania umbratica]	NA	0.211257	0.062225	0.105989	0.105333	0.241393	0.914424	2.29809	12.4719	1.91609	7.77622e-07	2.2754e-05	yes
gene-GIB67_023173	GIB67_023173	24675	rna-gnl|WGS:JACGCM|KingUnif14901.1	GO:0003677(DNA binding);GO:0003700(DNA binding transcription factor activity);GO:0005634(nucleus);GO:0006351(transcription, DNA-templated);GO:0006355(regulation of transcription, DNA-templated);GO:0009738(abscisic acid-activated signaling pathway);GO:0019760(glucosinolate metabolic process);GO:0043565(sequence-specific DNA binding)	NA	NA	NA	PREDICTED: dehydration-responsive element-binding protein 1B-like [Nelumbo nucifera]	NA	2.14235	1001.14	220.135	125.222	204.232	124.754	1.58739	0.83919	4.78854	7.84125e-07	2.29127e-05	yes
gene-GIB67_023085	GIB67_023085	38223	rna-gnl|WGS:JACGCM|KingUnif15552.1	GO:0003674(molecular_function);GO:0005576(extracellular region);GO:0005783(endoplasmic reticulum)	NA	NA	NA	SMP-30/Gluconolactonase/LRE-like region [Macleaya cordata]	NA	0.368011	0.131224	0.255697	8.69121	1.19348	14.1664	6.23767	4.42625	9.68768	7.92264e-07	2.31186e-05	yes
gene-GIB67_020319	GIB67_020319	10292	rna-gnl|WGS:JACGCM|KingUnif00350.1	GO:0005737(cytoplasm);GO:0008150(biological_process)	NA	NA	NA	hypothetical protein AQUCO_01100240v1 [Aquilegia coerulea]	NA	1.00323	0.119283	0.166322	29.81	2.08559	17.917	7.45719	2.96518	5.21347	7.99036e-07	2.32841e-05	yes
gene-GIB67_009686	GIB67_009686	37307	rna-gnl|WGS:JACGCM|KingUnif08865.1	GO:0003677(DNA binding);GO:0004824(lysine-tRNA ligase activity);GO:0005524(ATP binding);GO:0005737(cytoplasm);GO:0005829(cytosol);GO:0006430(lysyl-tRNA aminoacylation);GO:0009506(plasmodesma);GO:0046872(metal ion binding)	00970(Aminoacyl-tRNA biosynthesis)	K04567	EC:6.1.1.6	hypothetical protein SETIT_9G178100v2 [Setaria italica]	NA	2.61916	0.102096	0	0	0	0	6.2335	5.80034	1.79211	8.07495e-07	2.34666e-05	yes
gene-GIB67_028672	GIB67_028672	18931	rna-gnl|WGS:JACGCM|KingUnif15700.1	GO:0004197(cysteine-type endopeptidase activity);GO:0005615(extracellular space);GO:0005764(lysosome);GO:0051603(proteolysis involved in cellular protein catabolic process)	NA	NA	NA	hypothetical protein AQUCO_01400806v1 [Aquilegia coerulea]	NA	0.16545	0	0	2.07381	0.41271	0.136524	0.092434	195.83	0.403441	8.07512e-07	2.34666e-05	yes
gene-GIB67_008024	GIB67_008024	42972	rna-gnl|WGS:JACGCM|KingUnif24332.1	GO:0000502(proteasome complex);GO:0004298(threonine-type endopeptidase activity);GO:0005634(nucleus);GO:0005737(cytoplasm);GO:0005829(cytosol);GO:0005839(proteasome core complex);GO:0005886(plasma membrane);GO:0006511(ubiquitin-dependent protein catabolic process);GO:0008233(peptidase activity);GO:0009506(plasmodesma)	03050(Proteasome)	K02725	EC:3.4.25.1	PREDICTED: proteasome subunit alpha type-1-B-like [Nelumbo nucifera]	NA	0.994221	10.3899	6.68057	0.204781	10.4887	10.8064	0	0	0.060842	8.09124e-07	2.34812e-05	yes
gene-GIB67_023319	GIB67_023319	11690	rna-gnl|WGS:JACGCM|KingUnif10057.1	GO:0000981(RNA polymerase II transcription factor activity, sequence-specific DNA binding);GO:0001135(transcription factor activity, RNA polymerase II transcription factor recruiting);GO:0003677(DNA binding);GO:0003700(DNA binding transcription factor activity);GO:0005515(protein binding);GO:0005634(nucleus);GO:0006351(transcription, DNA-templated);GO:0006355(regulation of transcription, DNA-temp…	NA	NA	NA	PREDICTED: uncharacterized protein LOC104597747 [Nelumbo nucifera]	NA	0	0	0	7.42608	0	6.70486	0.299886	0	0.096622	8.20483e-07	2.37783e-05	yes
gene-GIB67_040780	GIB67_040780	2834	rna-gnl|WGS:JACGCM|KingUnif41030.1	GO:0003677(DNA binding);GO:0003700(DNA binding transcription factor activity);GO:0005634(nucleus);GO:0006351(transcription, DNA-templated);GO:0006355(regulation of transcription, DNA-templated);GO:0009873(ethylene-activated signaling pathway)	NA	NA	NA	PREDICTED: ethylene-responsive transcription factor RAP2-9-like [Nelumbo nucifera]	NA	0.697348	178.566	19.9206	84.9467	22.629	20.0552	0	0.188387	0.416594	8.22226e-07	2.37963e-05	yes
gene-GIB67_018486	GIB67_018486	30287	rna-gnl|WGS:JACGCM|KingUnif00817.1	NA	NA	NA	NA	uncharacterized protein LOC107646551 [Arachis ipaensis]	NA	0	3.88518	0.750552	0	0	0	0	0	0	8.26856e-07	2.38976e-05	yes
gene-GIB67_037888	GIB67_037888	35178	rna-gnl|WGS:JACGCM|KingUnif24093.1	NA	NA	NA	NA	hypothetical protein CUMW_012060 [Citrus unshiu]	NA	4.48611	0.709387	0.661711	43.4791	0.819198	46.5118	0.397433	1.34685	1.01499	8.36629e-07	2.41471e-05	yes
gene-GIB67_004498	GIB67_004498	19891	rna-gnl|WGS:JACGCM|KingUnif04454.1	GO:0005774(vacuolar membrane);GO:0015184(L-cystine transmembrane transporter activity);GO:0015811(L-cystine transport)	NA	NA	NA	PREDICTED: cystinosin homolog [Nelumbo nucifera]	NA	1.09446	3.47673	2.03119	0	0	0	0.083295	0	0	8.44942e-07	2.43539e-05	yes
gene-GIB67_000939	GIB67_000939	23350	rna-gnl|WGS:JACGCM|KingUnif09488.1	GO:0003674(molecular_function);GO:0007275(multicellular organism development);GO:0009733(response to auxin);GO:0009734(auxin-activated signaling pathway);GO:0040008(regulation of growth)	04075(Plant hormone signal transduction)	K14488	NA	PREDICTED: auxin-responsive protein SAUR32 [Nelumbo nucifera]	NA	227.809	411.019	127.783	28.1418	45.7428	40.2893	43.4012	85.2866	27.3292	8.47728e-07	2.4401e-05	yes
gene-GIB67_042832	GIB67_042832	7121	rna-gnl|WGS:JACGCM|KingUnif06454.1	GO:0004674(protein serine/threonine kinase activity);GO:0005515(protein binding);GO:0009554(megasporogenesis);GO:0009556(microsporogenesis);GO:0048658(anther wall tapetum development)	04075(Plant hormone signal transduction)	K13415	EC:2.7.10.1;EC:2.7.11.1	Protein kinase domain [Macleaya cordata]	NA	0.079003	0.054925	0.167468	4.36191	0.123489	5.70125	0.344452	0.458954	0.13964	8.58225e-07	2.46696e-05	yes
gene-GIB67_035659	GIB67_035659	43098	rna-gnl|WGS:JACGCM|KingUnif06272.1	GO:0005802(trans-Golgi network);GO:0005886(plasma membrane)	NA	NA	NA	PREDICTED: phosphate transporter PHO1 homolog 3 [Nelumbo nucifera]	NA	0.016008	0.337478	0.023699	3.07769	16.0006	1.60972	0.742518	0.4306	1.45743	8.7923e-07	2.52391e-05	yes
gene-GIB67_001015	GIB67_001015	23412	rna-gnl|WGS:JACGCM|KingUnif16882.1	GO:0005774(vacuolar membrane);GO:0005886(plasma membrane);GO:0016020(membrane);GO:0031225(anchored component of membrane);GO:0046658(anchored component of plasma membrane)	NA	NA	NA	hypothetical protein AQUCO_00500322v1 [Aquilegia coerulea]	NA	28.6185	6.41973	5.05922	89.3918	161.469	368.842	673.95	196.776	321.709	8.83996e-07	2.53416e-05	yes
gene-GIB67_015291	GIB67_015291	19302	rna-gnl|WGS:JACGCM|KingUnif10746.1	GO:0001708(cell fate specification);GO:0003700(DNA binding transcription factor activity);GO:0005515(protein binding);GO:0005634(nucleus);GO:0006355(regulation of transcription, DNA-templated);GO:0010051(xylem and phloem pattern formation);GO:0010089(xylem development);GO:0043565(sequence-specific DNA binding);GO:0045165(cell fate commitment)	NA	NA	NA	knotted-like protein [Populus tomentosa]	NA	1.561	1.75608	0	21.708	48.2391	31.492	63.1815	33.1485	30.9813	8.8797e-07	2.54211e-05	yes
gene-GIB67_030909	GIB67_030909	40154	rna-gnl|WGS:JACGCM|KingUnif04013.1	GO:0005737(cytoplasm);GO:0006725(cellular aromatic compound metabolic process);GO:0008198(ferrous iron binding);GO:0008270(zinc ion binding);GO:0016491(oxidoreductase activity);GO:0016701(oxidoreductase activity, acting on single donors with incorporation of molecular oxygen);GO:0051213(dioxygenase activity);GO:0055114(oxidation-reduction process)	00965(Betalain biosynthesis)	K15777	EC:1.13.11.-	Extradiol ring-cleavage dioxygenase [Macleaya cordata]	NA	17.2614	12.1319	17.3423	30.9605	47.6497	40.7055	121.254	79.1228	84.7599	8.9155e-07	2.54892e-05	yes
gene-GIB67_008559	GIB67_008559	15376	rna-gnl|WGS:JACGCM|KingUnif41129.1	GO:0000790(nuclear chromatin);GO:0003677(DNA binding);GO:0006342(chromatin silencing)	NA	NA	NA	hypothetical protein AQUCO_01700567v1 [Aquilegia coerulea]	NA	6.73409	6.68181	7.03979	99.2263	11.8549	96.4666	18.8292	17.2688	11.4697	8.94346e-07	2.55347e-05	yes
gene-GIB67_010037	GIB67_010037	42942	rna-gnl|WGS:JACGCM|KingUnif19310.1	GO:0003779(actin binding);GO:0005515(protein binding);GO:0005635(nuclear envelope);GO:0016021(integral component of membrane);GO:0031965(nuclear membrane)	NA	NA	NA	hypothetical protein AQUCO_00900539v1 [Aquilegia coerulea]	NA	0.035853	0.030721	0	2.33006	0.092183	5.90067	0.187883	0.26915	0.398953	9.0235e-07	2.57285e-05	yes
gene-GIB67_008089	GIB67_008089	24533	rna-gnl|WGS:JACGCM|KingUnif21496.1	GO:0005737(cytoplasm);GO:0030001(metal ion transport);GO:0046914(transition metal ion binding);GO:0046916(cellular transition metal ion homeostasis)	NA	NA	NA	hypothetical protein AQUCO_00500208v1 [Aquilegia coerulea]	NA	71.7546	117.51	84.3685	2.00621	5.05352	3.31844	1.51293	32.3776	1.90642	9.38959e-07	2.67311e-05	yes
gene-GIB67_004327	GIB67_004327	19714	rna-gnl|WGS:JACGCM|KingUnif41924.1	GO:0003950(NAD+ ADP-ribosyltransferase activity);GO:0005634(nucleus);GO:0007275(multicellular organism development)	NA	NA	NA	PREDICTED: probable inactive poly [ADP-ribose] polymerase SRO2 [Nelumbo nucifera]	NA	4.97416	60.1563	52.5127	85.9647	91.9579	62.2785	1.50151	5.15719	5.86624	9.40036e-07	2.67311e-05	yes
gene-GIB67_038290	GIB67_038290	43121	rna-gnl|WGS:JACGCM|KingUnif16794.1	GO:0005737(cytoplasm);GO:0016740(transferase activity);GO:0016747(transferase activity, transferring acyl groups other than amino-acyl groups)	00942(Anthocyanin biosynthesis)	K21383	EC:2.3.1.215	hypothetical protein AQUCO_00800031v1 [Aquilegia coerulea]	NA	0	0	0.045716	1.41501	0.683919	10.2413	1.28587	17.0668	0.751914	9.42854e-07	2.67509e-05	yes
gene-GIB67_032647	GIB67_032647	1171	rna-gnl|WGS:JACGCM|KingUnif37795.1	GO:0005515(protein binding);GO:0010088(phloem development);GO:0032502(developmental process);GO:0032875(regulation of DNA endoreduplication);GO:0046872(metal ion binding);GO:0048364(root development)	NA	NA	NA	zinc finger protein [Macleaya cordata]	NA	9.05516	25.9387	17.0151	0.68601	0.753969	2.14847	1.41733	4.46066	0.485991	9.43258e-07	2.67509e-05	yes
gene-GIB67_033819	GIB67_033819	34772	rna-gnl|WGS:JACGCM|KingUnif39995.1	GO:0016020(membrane);GO:0016709(oxidoreductase activity, acting on paired donors, with incorporation or reduction of molecular oxygen, NAD(P)H as one donor, and incorporation of one atom of oxygen);GO:0042343(indole glucosinolate metabolic process);GO:0044550(secondary metabolite biosynthetic process);GO:0098542(defense response to other organism)	NA	NA	NA	cytochrome P450 [Sinopodophyllum hexandrum]	NA	3.93992	0.19307	0.389329	79.8935	5.06057	155.165	11.7326	16.8196	5.93018	9.46827e-07	2.68162e-05	yes
gene-GIB67_030658	GIB67_030658	10200	rna-gnl|WGS:JACGCM|KingUnif13973.1	NA	NA	NA	NA	PREDICTED: uncharacterized protein LOC105122365 [Populus euphratica]	NA	10.674	196.053	793.549	7.53218	2.66046	27.228	21.3364	2.07492	1.19701	9.62973e-07	2.72015e-05	yes
gene-GIB67_012230	GIB67_012230	10348	rna-gnl|WGS:JACGCM|KingUnif28036.1	GO:0005618(cell wall);GO:0009506(plasmodesma);GO:0010497(plasmodesmata-mediated intercellular transport);GO:0033609(oxalate metabolic process);GO:0046564(oxalate decarboxylase activity);GO:2000280(regulation of root development)	00450(Selenocompound metabolism)	K00384	EC:1.8.1.9	germin-like protein 2 precursor [Cinnamomum micranthum f. kanehirae]	NA	0.143657	0.271007	0.83021	1.4816	10.181	10.4414	33.4525	17.1313	5.08216	9.62998e-07	2.72015e-05	yes
gene-GIB67_035549	GIB67_035549	36621	rna-gnl|WGS:JACGCM|KingUnif11713.1	GO:0016020(membrane);GO:0016709(oxidoreductase activity, acting on paired donors, with incorporation or reduction of molecular oxygen, NAD(P)H as one donor, and incorporation of one atom of oxygen);GO:0044550(secondary metabolite biosynthetic process)	NA	NA	NA	cytochrome P450 71A1-like [Papaver somniferum]	NA	1.05585	0.628321	0.772696	8.48115	0.523503	11.6489	0.250936	0.41495	0.228139	9.72599e-07	2.74361e-05	yes
gene-GIB67_009049	GIB67_009049	1878	rna-gnl|WGS:JACGCM|KingUnif28549.1	GO:0003674(molecular_function);GO:0005634(nucleus);GO:0008150(biological_process)	NA	NA	NA	hypothetical protein BVC80_1707g60 [Macleaya cordata]	NA	0	0	0	0.491212	0.610919	0.312708	1.02591	1.18714	0.528361	9.97069e-07	2.8089e-05	yes
gene-GIB67_029729	GIB67_029729	33767	rna-gnl|WGS:JACGCM|KingUnif36470.1	GO:0003677(DNA binding);GO:0003700(DNA binding transcription factor activity);GO:0005634(nucleus);GO:0006351(transcription, DNA-templated);GO:0006355(regulation of transcription, DNA-templated);GO:0007275(multicellular organism development);GO:0009873(ethylene-activated signaling pathway);GO:0010311(lateral root formation);GO:0010492(maintenance of shoot apical meristem identity);GO:0060771(phyll…	NA	NA	NA	AP2/ERF domain [Macleaya cordata]	NA	0.357926	0.65075	0.354531	12.4694	2.26362	12.8395	1.64269	3.73638	1.2761	1.02814e-06	2.8926e-05	yes
gene-GIB67_025430	GIB67_025430	16255	rna-gnl|WGS:JACGCM|KingUnif26048.1	GO:0004674(protein serine/threonine kinase activity);GO:0005886(plasma membrane);GO:0006468(protein phosphorylation);GO:0006952(defense response);GO:0009506(plasmodesma)	NA	NA	NA	Protein kinase domain [Macleaya cordata]	NA	0.493519	0.936077	34.5664	0.554998	0.339322	0.827333	0.394956	0.345145	0.440762	1.03756e-06	2.91522e-05	yes
gene-GIB67_019221	GIB67_019221	16886	rna-gnl|WGS:JACGCM|KingUnif14643.1	GO:0005524(ATP binding);GO:0006508(proteolysis);GO:0008233(peptidase activity);GO:0009507(chloroplast)	NA	NA	NA	uncharacterized protein LOC100790681 [Glycine max]	NA	2.17707	2.4397	10.3092	0.692853	0.161661	1.29455	0.157978	0.104845	0.103843	1.06578e-06	2.99053e-05	yes
gene-GIB67_023333	GIB67_023333	34809	rna-gnl|WGS:JACGCM|KingUnif09458.1	GO:0003677(DNA binding);GO:0003700(DNA binding transcription factor activity);GO:0005634(nucleus);GO:0006351(transcription, DNA-templated);GO:0006355(regulation of transcription, DNA-templated);GO:0007275(multicellular organism development);GO:0009791(post-embryonic development);GO:0009845(seed germination);GO:0009873(ethylene-activated signaling pathway);GO:0010311(lateral root formation);GO:004…	NA	NA	NA	PREDICTED: AP2-like ethylene-responsive transcription factor AIL5 [Nelumbo nucifera]	NA	0.618302	0.059135	0.111905	9.87822	0.95777	36.8388	0.32021	2.021	0.081304	1.08497e-06	3.04034e-05	yes
gene-GIB67_001238	GIB67_001238	35584	rna-gnl|WGS:JACGCM|KingUnif38753.1	GO:0005739(mitochondrion);GO:0006486(protein glycosylation);GO:0009058(biosynthetic process);GO:0016021(integral component of membrane);GO:0016051(carbohydrate biosynthetic process);GO:0016740(transferase activity);GO:0016757(transferase activity, transferring glycosyl groups);GO:0016758(transferase activity, transferring hexosyl groups);GO:0046872(metal ion binding)	00500(Starch and sucrose metabolism)	K00750	EC:2.4.1.186	Glycosyl transferase [Macleaya cordata]	NA	2.2354	88.8699	77.8247	98.3322	246.796	232.464	5.5423	8.15513	3.06841	1.09712e-06	3.07033e-05	yes
gene-GIB67_025664	GIB67_025664	38282	rna-gnl|WGS:JACGCM|KingUnif02746.1	GO:0003755(peptidyl-prolyl cis-trans isomerase activity);GO:0005528(FK506 binding);GO:0005789(endoplasmic reticulum membrane);GO:0061077(chaperone-mediated protein folding)	00561(Glycerolipid metabolism)	K21362	EC:2.4.1.184	PREDICTED: peptidyl-prolyl cis-trans isomerase FKBP17-2, chloroplastic [Nelumbo nucifera]	NA	21.1694	35.0966	49.0104	11.9709	6.14906	11.6928	5.94815	1.69827	3.8343	1.20009e-06	3.35409e-05	yes
gene-GIB67_037435	GIB67_037435	6598	rna-gnl|WGS:JACGCM|KingUnif32370.1	GO:0003006(developmental process involved in reproduction);GO:0005737(cytoplasm);GO:0009553(embryo sac development);GO:0009555(pollen development);GO:0010183(pollen tube guidance);GO:0048443(stamen development)	NA	NA	NA	CBS domain [Macleaya cordata]	NA	3.32226	2.13816	3.3727	4.65508	2.8081	55.3401	0.163009	0.799021	0.022632	1.20801e-06	3.37176e-05	yes
gene-GIB67_023341	GIB67_023341	34811	rna-gnl|WGS:JACGCM|KingUnif06226.1	GO:0005515(protein binding)	00630(Glyoxylate and dicarboxylate metabolism);00710(Carbon fixation in photosynthetic organisms)	K01602	EC:4.1.1.39	Ribulose bisphosphate carboxylase small chain [Macleaya cordata]	NA	0	0.111914	0.123639	0.780703	9.52505	0.319334	0.626777	43.2161	22.4957	1.21952e-06	3.39941e-05	yes
gene-GIB67_004826	GIB67_004826	32988	rna-gnl|WGS:JACGCM|KingUnif05307.1	NA	NA	NA	NA		NA	5.85129	0	0.137462	0	0	0	12.8983	12.2306	8.07586	1.22422e-06	3.40802e-05	yes
gene-GIB67_012130	GIB67_012130	13403	rna-gnl|WGS:JACGCM|KingUnif10333.1	GO:0005524(ATP binding);GO:0009507(chloroplast);GO:0009570(chloroplast stroma);GO:0009941(chloroplast envelope);GO:0016887(ATPase activity);GO:0019538(protein metabolic process);GO:0034214(protein hexamerization);GO:0042803(protein homodimerization activity)	NA	NA	NA	hypothetical protein AQUCO_02400049v1 [Aquilegia coerulea]	NA	6.31396	12.8137	61.709	4.93433	4.18235	4.38339	3.28694	3.00076	2.47606	1.22992e-06	3.41939e-05	yes
gene-GIB67_005933	GIB67_005933	24878	rna-gnl|WGS:JACGCM|KingUnif19110.1	NA	NA	NA	NA	hypothetical protein AQUCO_02600390v1 [Aquilegia coerulea]	NA	6.41185	7.39505	40.0842	92.6793	102.773	126.946	6.40036	12.6361	14.2919	1.2364e-06	3.43291e-05	yes
gene-GIB67_016298	GIB67_016298	25669	rna-gnl|WGS:JACGCM|KingUnif35043.1	GO:0005737(cytoplasm);GO:0005829(cytosol);GO:0016740(transferase activity);GO:0016747(transferase activity, transferring acyl groups other than amino-acyl groups)	NA	NA	NA	Transferase [Macleaya cordata]	NA	17.3151	12.4035	58.7792	274.801	538.94	223.674	42.4066	92.0814	41.1139	1.24648e-06	3.45636e-05	yes
gene-GIB67_036283	GIB67_036283	39780	rna-gnl|WGS:JACGCM|KingUnif17524.1	GO:0003674(molecular_function);GO:0005739(mitochondrion);GO:0009507(chloroplast);GO:0009534(chloroplast thylakoid);GO:0009535(chloroplast thylakoid membrane);GO:0009941(chloroplast envelope);GO:0016020(membrane)	NA	NA	NA	uncharacterized protein LOC113298392 [Papaver somniferum]	NA	7.27126	5.56375	32.8291	4.03119	1.4279	4.30004	0.852084	0.361231	0.763645	1.25407e-06	3.47287e-05	yes
gene-GIB67_015788	GIB67_015788	6489	rna-gnl|WGS:JACGCM|KingUnif26574.1	GO:0003674(molecular_function);GO:0005737(cytoplasm);GO:0005886(plasma membrane);GO:0007623(circadian rhythm);GO:0009409(response to cold);GO:0009414(response to water deprivation);GO:0009507(chloroplast);GO:0009644(response to high light intensity);GO:0009651(response to salt stress);GO:0009737(response to abscisic acid)	04144(Endocytosis)	K19366	NA	hypothetical protein AQUCO_00600255v1 [Aquilegia coerulea]	NA	20.4518	29.2889	81.4919	25.6011	20.0019	26.7706	3.55996	6.76374	3.25219	1.31904e-06	3.64803e-05	yes
gene-GIB67_026367	GIB67_026367	2202	rna-gnl|WGS:JACGCM|KingUnif11669.1	GO:0000977(RNA polymerase II regulatory region sequence-specific DNA binding);GO:0001085(RNA polymerase II transcription factor binding);GO:0001228(transcriptional activator activity, RNA polymerase II transcription regulatory region sequence-specific DNA binding);GO:0003682(chromatin binding);GO:0005634(nucleus);GO:0005667(transcription factor complex);GO:0030154(cell differentiation)	NA	NA	NA	GATA transcription factor 21-like [Quercus suber]	NA	0.084633	0	0	3.15458	0.04794	8.72364	0	0	0.049382	1.33439e-06	3.68568e-05	yes
gene-GIB67_033863	GIB67_033863	22329	rna-gnl|WGS:JACGCM|KingUnif06661.1	GO:0005634(nucleus);GO:0005737(cytoplasm)	NA	NA	NA	WD40 repeat [Macleaya cordata]	NA	1.68543	0.201216	0.374135	1.66508	8.75964	4.87138	12.6254	20.1717	10.0919	1.35629e-06	3.74128e-05	yes
gene-GIB67_007515	GIB67_007515	30408	rna-gnl|WGS:JACGCM|KingUnif31461.1	GO:0000139(Golgi membrane);GO:0005794(Golgi apparatus);GO:0009294(DNA mediated transformation);GO:0009617(response to bacterium);GO:0016021(integral component of membrane);GO:0016757(transferase activity, transferring glycosyl groups);GO:0047259(glucomannan 4-beta-mannosyltransferase activity);GO:0051753(mannan synthase activity);GO:0071555(cell wall organization)	NA	NA	NA	Glucomannan 4-beta-mannosyltransferase [Actinidia chinensis var. chinensis]	NA	2.47174	0.73112	0.32065	8.30819	3.04245	46.962	50.4133	20.2662	44.7482	1.35865e-06	3.74291e-05	yes
gene-GIB67_024671	GIB67_024671	32902	rna-gnl|WGS:JACGCM|KingUnif18813.1	GO:0004672(protein kinase activity);GO:0004674(protein serine/threonine kinase activity);GO:0005515(protein binding);GO:0005524(ATP binding);GO:0005886(plasma membrane);GO:0006468(protein phosphorylation);GO:0007169(transmembrane receptor protein tyrosine kinase signaling pathway);GO:0009506(plasmodesma);GO:0010067(procambium histogenesis);GO:0010087(phloem or xylem histogenesis);GO:0010183(polle…	NA	NA	NA	Protein kinase domain [Macleaya cordata]	NA	0	0	0	0.517179	0.020094	1.98375	0.156166	0.171288	0.162134	1.3888e-06	3.82101e-05	yes
gene-GIB67_005618	GIB67_005618	10380	rna-gnl|WGS:JACGCM|KingUnif16942.1	GO:0005576(extracellular region);GO:0016829(lyase activity)	NA	NA	NA	Rhamnogalacturonate lyase [Macleaya cordata]	NA	0	0.028235	0	0.049451	0	0.071046	0.204288	2.34569	1.71205	1.40447e-06	3.85911e-05	yes
gene-GIB67_017917	GIB67_017917	11740	rna-gnl|WGS:JACGCM|KingUnif09136.1	GO:0008643(carbohydrate transport);GO:0016021(integral component of membrane);GO:0051119(sugar transmembrane transporter activity)	NA	NA	NA	SWEET sugar transporter [Macleaya cordata]	NA	3.02608	7.24734	1.50311	0.064846	0.185974	0.145158	0.300666	0.760239	0.063792	1.42304e-06	3.90508e-05	yes
gene-GIB67_016039	GIB67_016039	40556	rna-gnl|WGS:JACGCM|KingUnif37607.1	GO:0004674(protein serine/threonine kinase activity);GO:0005515(protein binding);GO:0005524(ATP binding);GO:0005886(plasma membrane);GO:0006468(protein phosphorylation);GO:0006833(water transport);GO:0007169(transmembrane receptor protein tyrosine kinase signaling pathway);GO:0009611(response to wounding);GO:0009793(embryo development ending in seed dormancy);GO:0016021(integral component of memb…	NA	NA	NA	Protein kinase domain [Macleaya cordata]	NA	2.04891	2.01497	2.42142	13.524	13.1432	14.9253	17.5069	9.07121	6.99545	1.43087e-06	3.92148e-05	yes
gene-GIB67_033020	GIB67_033020	17256	rna-gnl|WGS:JACGCM|KingUnif08337.1	GO:0005515(protein binding);GO:0005773(vacuole);GO:0005774(vacuolar membrane);GO:0005794(Golgi apparatus);GO:0005829(cytosol);GO:0005886(plasma membrane);GO:0009506(plasmodesma);GO:0016020(membrane);GO:0043424(protein histidine kinase binding)	NA	NA	NA	hypersensitive-induced response protein 1 [Brassica napus]	NA	79.7278	212.993	253.259	15.2189	13.2751	17.1755	17.1622	77.4785	15.5241	1.4494e-06	3.9617e-05	yes
gene-GIB67_026590	GIB67_026590	8491	rna-gnl|WGS:JACGCM|KingUnif25774.1	GO:0004364(glutathione transferase activity);GO:0005737(cytoplasm);GO:0006749(glutathione metabolic process);GO:0009407(toxin catabolic process)	00480(Glutathione metabolism)	K00799	EC:2.5.1.18	hypothetical protein COLO4_17391 [Corchorus olitorius]	NA	28.3639	166.696	107.528	2.46626	2.88017	4.96506	1.00971	19.8203	0.28207	1.44995e-06	3.9617e-05	yes
gene-GIB67_021355	GIB67_021355	24447	rna-gnl|WGS:JACGCM|KingUnif20774.1	GO:0003674(molecular_function);GO:0005739(mitochondrion);GO:0016021(integral component of membrane)	NA	NA	NA	hypothetical protein AQUCO_02000152v1 [Aquilegia coerulea]	NA	0	0.548598	0	3.5786	0.362219	0.150059	1.90882	4.02813	147.55	1.45116e-06	3.9617e-05	yes
gene-GIB67_019568	GIB67_019568	16580	rna-gnl|WGS:JACGCM|KingUnif08578.1	GO:0001666(response to hypoxia);GO:0004674(protein serine/threonine kinase activity);GO:0004712(protein serine/threonine/tyrosine kinase activity);GO:0005515(protein binding);GO:0005524(ATP binding);GO:0005634(nucleus);GO:0005789(endoplasmic reticulum membrane);GO:0009686(gibberellin biosynthetic process);GO:0009723(response to ethylene);GO:0009744(response to sucrose);GO:0009750(response to fruc…	04016(MAPK signaling pathway - plant);04075(Plant hormone signal transduction)	K14510	EC:2.7.11.1	PREDICTED: serine/threonine-protein kinase CTR1-like isoform X2 [Nelumbo nucifera]	NA	0.77309	0.597554	0.558565	7.46329	4.09209	5.01764	4.0464	8.73848	4.76586	1.46474e-06	3.99363e-05	yes
gene-GIB67_031355	GIB67_031355	2382	rna-gnl|WGS:JACGCM|KingUnif21579.1	GO:0004674(protein serine/threonine kinase activity);GO:0005886(plasma membrane);GO:0006468(protein phosphorylation)	NA	NA	NA	probable receptor-like protein kinase At5g20050 [Hevea brasiliensis]	NA	0	0	0.016729	0.029894	0.844519	3.30482	3.6272	0.694448	2.62009	1.47368e-06	4.01285e-05	yes
gene-GIB67_041964	GIB67_041964	4498	rna-gnl|WGS:JACGCM|KingUnif05968.1	GO:0004497(monooxygenase activity)	NA	NA	NA	Cytochrome P450 [Macleaya cordata]	NA	0.188451	0.196885	0.234419	1.28191	4.55149	2.77564	5.26069	5.19981	4.53841	1.4936e-06	4.06186e-05	yes
gene-GIB67_014110	GIB67_014110	15231	rna-gnl|WGS:JACGCM|KingUnif05354.1	GO:0005351(carbohydrate:proton symporter activity);GO:0005355(glucose transmembrane transporter activity);GO:0005887(integral component of plasma membrane);GO:0046323(glucose import)	NA	NA	NA	putative inositol transporter 2 [Cinnamomum micranthum f. kanehirae]	NA	4.61776	11.7141	20.7986	4.26841	0.8134	2.61637	0.422145	1.40008	0.443623	1.51841e-06	4.12405e-05	yes
gene-GIB67_040181	GIB67_040181	18556	rna-gnl|WGS:JACGCM|KingUnif23560.1	GO:0016020(membrane);GO:0016709(oxidoreductase activity, acting on paired donors, with incorporation or reduction of molecular oxygen, NAD(P)H as one donor, and incorporation of one atom of oxygen);GO:0044550(secondary metabolite biosynthetic process)	NA	NA	NA	PREDICTED: cytochrome P450 93A3-like [Juglans regia]	NA	14.2086	28.2867	515.188	13.72	0.730299	6.26387	6.32383	9.83491	0.866418	1.52754e-06	4.14353e-05	yes
gene-GIB67_032094	GIB67_032094	17716	rna-gnl|WGS:JACGCM|KingUnif28466.1	GO:0003677(DNA binding);GO:0005634(nucleus);GO:0006355(regulation of transcription, DNA-templated);GO:0007275(multicellular organism development);GO:0009299(mRNA transcription);GO:0009416(response to light stimulus)	04016(MAPK signaling pathway - plant);04075(Plant hormone signal transduction);04626(Plant-pathogen interaction)	K13413	EC:2.7.12.2	PREDICTED: protein LIGHT-DEPENDENT SHORT HYPOCOTYLS 10-like [Prunus mume]	NA	7.8016	10.254	1.02056	17.4578	56.6036	75.5578	143.999	50.8164	167.305	1.54651e-06	4.18963e-05	yes
gene-GIB67_011976	GIB67_011976	28971	rna-gnl|WGS:JACGCM|KingUnif14415.1	GO:0000103(sulfate assimilation);GO:0006457(protein folding);GO:0009507(chloroplast);GO:0015035(protein disulfide oxidoreductase activity);GO:0016671(oxidoreductase activity, acting on a sulfur group of donors, disulfide as acceptor);GO:0034599(cellular response to oxidative stress);GO:0045454(cell redox homeostasis);GO:0055114(oxidation-reduction process)	NA	NA	NA	Thioredoxin [Macleaya cordata]	NA	14.3619	23.6312	50.1411	124.574	103.117	54.1927	11.6606	12.3982	14.0111	1.55365e-06	4.20223e-05	yes
gene-GIB67_003521	GIB67_003521	23794	rna-gnl|WGS:JACGCM|KingUnif37765.1	GO:0003700(DNA binding transcription factor activity);GO:0005634(nucleus);GO:0006355(regulation of transcription, DNA-templated);GO:0043565(sequence-specific DNA binding)	NA	NA	NA	zinc finger protein [Macleaya cordata]	NA	0.452629	0.017731	0.120696	10.3337	0.36617	10.7572	0.400581	0.480193	0.760527	1.55513e-06	4.20223e-05	yes
gene-GIB67_003496	GIB67_003496	23771	rna-gnl|WGS:JACGCM|KingUnif05558.1	NA	NA	NA	NA	Bulb-type lectin domain [Macleaya cordata]	NA	0.688301	19.5428	84.3638	0	0	0	0	5.96654	0	1.5736e-06	4.24263e-05	yes
gene-GIB67_016185	GIB67_016185	31379	rna-gnl|WGS:JACGCM|KingUnif35909.1	GO:0005634(nucleus);GO:0052689(carboxylic ester hydrolase activity)	NA	NA	NA	PREDICTED: probable carboxylesterase 2 [Nelumbo nucifera]	NA	15.7329	26.4305	1.07952	0.174258	0.354403	0.15363	3.56143	6.65981	0.690648	1.57569e-06	4.24263e-05	yes
gene-GIB67_032123	GIB67_032123	17742	rna-gnl|WGS:JACGCM|KingUnif29636.1	GO:0001046(core promoter sequence-specific DNA binding);GO:0001228(transcriptional activator activity, RNA polymerase II transcription regulatory region sequence-specific DNA binding);GO:0005634(nucleus);GO:0006366(transcription by RNA polymerase II)	NA	NA	NA	PREDICTED: transcription factor bHLH123-like [Nelumbo nucifera]	NA	3.03544	56.0871	56.0754	4.87797	8.28654	5.06996	1.89366	3.09884	0.298615	1.57609e-06	4.24263e-05	yes
gene-GIB67_040688	GIB67_040688	43224	rna-gnl|WGS:JACGCM|KingUnif04305.1	GO:0004674(protein serine/threonine kinase activity);GO:0005886(plasma membrane);GO:0006468(protein phosphorylation)	NA	NA	NA	PREDICTED: receptor-like serine/threonine-protein kinase At2g45590 [Nelumbo nucifera]	NA	1.17234	40.4746	51.7945	26.2599	68.3404	29.5756	1.1775	1.6802	1.5682	1.57861e-06	4.24401e-05	yes
gene-GIB67_010752	GIB67_010752	38139	rna-gnl|WGS:JACGCM|KingUnif30104.1	GO:0003677(DNA binding);GO:0003700(DNA binding transcription factor activity);GO:0005634(nucleus);GO:0006351(transcription, DNA-templated);GO:0006355(regulation of transcription, DNA-templated);GO:0009873(ethylene-activated signaling pathway);GO:0010087(phloem or xylem histogenesis);GO:0010200(response to chitin);GO:0050832(defense response to fungus);GO:0051301(cell division)	NA	NA	NA	ethylene-responsive transcription factor ERF109-like [Momordica charantia]	NA	7.17008	1592.49	512.354	199.14	352.418	404.344	3.63964	11.4485	9.86304	1.59547e-06	4.28391e-05	yes
gene-GIB67_030796	GIB67_030796	40039	rna-gnl|WGS:JACGCM|KingUnif06248.1	GO:0004860(protein kinase inhibitor activity);GO:0005515(protein binding);GO:0005575(cellular_component);GO:0007049(cell cycle)	NA	NA	NA	PREDICTED: uncharacterized protein LOC103959733 [Pyrus x bretschneideri]	NA	2.53654	329.106	316.305	156.06	205.035	269.609	2.35189	7.39465	4.96137	1.60046e-06	4.29186e-05	yes
gene-GIB67_041606	GIB67_041606	20033	rna-gnl|WGS:JACGCM|KingUnif09147.1	GO:0004601(peroxidase activity);GO:0009505(plant-type cell wall);GO:0009664(plant-type cell wall organization)	00940(Phenylpropanoid biosynthesis)	K00430	EC:1.11.1.7	PREDICTED: peroxidase 5 [Eucalyptus grandis]	NA	0	0	0	0	0	0	1.86447	0.790818	1.26749	1.60691e-06	4.30371e-05	yes
gene-GIB67_028749	GIB67_028749	7853	rna-gnl|WGS:JACGCM|KingUnif13863.1	GO:0003677(DNA binding);GO:0003700(DNA binding transcription factor activity);GO:0005634(nucleus);GO:0006351(transcription, DNA-templated);GO:0006355(regulation of transcription, DNA-templated);GO:0007275(multicellular organism development);GO:0044212(transcription regulatory region DNA binding);GO:0045893(positive regulation of transcription, DNA-templated);GO:0071555(cell wall organization);GO:…	NA	NA	NA	PREDICTED: uncharacterized protein LOC104588253 isoform X1 [Nelumbo nucifera]	NA	1.46953	2.06364	1.79049	0.04336	0.115412	0.090117	0.113524	0.41591	0.167636	1.62353e-06	4.34274e-05	yes
gene-GIB67_033384	GIB67_033384	31146	rna-gnl|WGS:JACGCM|KingUnif27110.1	GO:0000287(magnesium ion binding);GO:0008152(metabolic process);GO:0009507(chloroplast);GO:0010333(terpene synthase activity);GO:0016114(terpenoid biosynthetic process);GO:0034007(S-linalool synthase activity);GO:0043693(monoterpene biosynthetic process)	00909(Sesquiterpenoid and triterpenoid biosynthesis)	K14175	EC:4.2.3.48	(3S,6E)-nerolidol synthase 1, chloroplastic [Vitis vinifera]	NA	0.189547	0.681797	11.4248	0.1579	0.11885	0.225548	0	0.078558	0	1.6424e-06	4.38768e-05	yes
gene-GIB67_026651	GIB67_026651	10344	rna-gnl|WGS:JACGCM|KingUnif39293.1	NA	NA	NA	NA	protein MAINTENANCE OF MERISTEMS-like [Chenopodium quinoa]	NA	0	0	0	0	0.080755	0.167068	1.52104	1.3295	0.461698	1.68417e-06	4.4936e-05	yes
gene-GIB67_042208	GIB67_042208	36267	rna-gnl|WGS:JACGCM|KingUnif14013.1	GO:0005737(cytoplasm);GO:0006725(cellular aromatic compound metabolic process);GO:0008198(ferrous iron binding);GO:0008270(zinc ion binding);GO:0016491(oxidoreductase activity);GO:0016701(oxidoreductase activity, acting on single donors with incorporation of molecular oxygen);GO:0051213(dioxygenase activity);GO:0055114(oxidation-reduction process)	00965(Betalain biosynthesis)	K15777	EC:1.13.11.-	PREDICTED: extradiol ring-cleavage dioxygenase-like [Nelumbo nucifera]	NA	13.5177	3.38627	12.6516	16.4634	15.1963	32.0196	79.4396	59.0875	85.9019	1.70351e-06	4.53947e-05	yes
gene-GIB67_014555	GIB67_014555	36868	rna-gnl|WGS:JACGCM|KingUnif26682.1	GO:0005576(extracellular region)	00073(Cutin, suberine and wax biosynthesis)	K15402	EC:1.14.-.-	Cytochrome P450 [Macleaya cordata]	NA	0.106708	2.20139	0.330705	8.48727	4.21764	13.6535	0.37953	0.390144	0.529957	1.70604e-06	4.54051e-05	yes
gene-GIB67_040221	GIB67_040221	18586	rna-gnl|WGS:JACGCM|KingUnif20475.1	GO:0005509(calcium ion binding);GO:0005544(calcium-dependent phospholipid binding);GO:0005886(plasma membrane)	00270(Cysteine and methionine metabolism);00450(Selenocompound metabolism)	K00549	EC:2.1.1.14	C2 calcium-dependent membrane targeting [Macleaya cordata]	NA	17.5168	19.1128	18.7946	2.00182	1.65252	2.26639	1.05139	6.71099	0.884701	1.73031e-06	4.59932e-05	yes
gene-GIB67_037412	GIB67_037412	26013	rna-gnl|WGS:JACGCM|KingUnif20954.1	GO:0003674(molecular_function);GO:0009507(chloroplast);GO:0009534(chloroplast thylakoid);GO:0009535(chloroplast thylakoid membrane);GO:0009543(chloroplast thylakoid lumen);GO:0009570(chloroplast stroma);GO:0009579(thylakoid);GO:0009735(response to cytokinin);GO:0009941(chloroplast envelope);GO:0010206(photosystem II repair);GO:0016021(integral component of membrane);GO:0031977(thylakoid lumen)	NA	NA	NA	hypothetical protein AQUCO_00600016v1 [Aquilegia coerulea]	NA	13.6992	1.15862	32.046	1.58259	0.276361	2.93059	0.698632	0.388483	0.585295	1.73544e-06	4.60719e-05	yes
gene-GIB67_005402	GIB67_005402	10502	rna-gnl|WGS:JACGCM|KingUnif13624.1	GO:0005634(nucleus);GO:0006355(regulation of transcription, DNA-templated);GO:0009954(proximal/distal pattern formation);GO:0009965(leaf morphogenesis);GO:0048441(petal development)	NA	NA	NA	hypothetical protein AQUCO_00700083v1 [Aquilegia coerulea]	NA	0.005868	0.062225	0.152661	4.94747	6.89675	1.76353	2.54399	0.592499	0.832495	1.75512e-06	4.64831e-05	yes
gene-GIB67_035115	GIB67_035115	6019	rna-gnl|WGS:JACGCM|KingUnif17836.1	GO:0000139(Golgi membrane);GO:0000271(polysaccharide biosynthetic process);GO:0000919(cell plate assembly);GO:0000977(RNA polymerase II regulatory region sequence-specific DNA binding);GO:0005794(Golgi apparatus);GO:0006970(response to osmotic stress);GO:0009414(response to water deprivation);GO:0009651(response to salt stress);GO:0009832(plant-type cell wall biogenesis);GO:0016021(integral compo…	00520(Amino sugar and nucleotide sugar metabolism)	K00770	EC:2.4.2.24	PREDICTED: cellulose synthase-like protein D5 [Vitis vinifera]	NA	0.060048	0.104098	0.047815	3.45653	0.106406	9.7067	1.35181	0.367227	1.11248	1.75532e-06	4.64831e-05	yes
gene-GIB67_008823	GIB67_008823	30440	rna-gnl|WGS:JACGCM|KingUnif06445.1	GO:0009575(chromoplast stroma);GO:0016117(carotenoid biosynthetic process);GO:0016767(geranylgeranyl-diphosphate geranylgeranyltransferase activity)	00906(Carotenoid biosynthesis)	K02291	EC:2.5.1.32	Squalene/phytoene synthase [Macleaya cordata]	NA	20.5609	50.0397	53.5275	21.6902	31.0356	25.7606	6.10137	6.17387	5.60326	1.77831e-06	4.70331e-05	yes
gene-GIB67_005403	GIB67_005403	10519	rna-gnl|WGS:JACGCM|KingUnif41404.1	NA	NA	NA	NA	hypothetical protein BVC80_1831g158 [Macleaya cordata]	NA	1.85999	1.96	2.21427	0.606691	2.49707	0.726149	1.91259	208.889	0.594548	1.782e-06	4.70718e-05	yes
gene-GIB67_005709	GIB67_005709	42785	rna-gnl|WGS:JACGCM|KingUnif16646.1	GO:0005829(cytosol);GO:0009793(embryo development ending in seed dormancy)	NA	NA	NA	PREDICTED: embryonic protein DC-8-like [Nelumbo nucifera]	NA	0.154199	0.022738	0.071706	9.15215	0.360408	3.60003	0.574616	0.839388	0.167607	1.82584e-06	4.81699e-05	yes
gene-GIB67_006243	GIB67_006243	2537	rna-gnl|WGS:JACGCM|KingUnif07285.1	GO:0006810(transport);GO:0030288(outer membrane-bounded periplasmic space);GO:0036094(small molecule binding)	NA	NA	NA	hypothetical protein AQUCO_00201356v1 [Aquilegia coerulea]	NA	0.149216	0.09217	0	2.83126	0.543635	9.95186	0.416308	0.207218	0.524621	1.88211e-06	4.95927e-05	yes
gene-GIB67_003668	GIB67_003668	27642	rna-gnl|WGS:JACGCM|KingUnif09451.1	GO:0003333(amino acid transmembrane transport);GO:0005886(plasma membrane);GO:0015171(amino acid transmembrane transporter activity)	NA	NA	NA	hypothetical protein AQUCO_01100420v1 [Aquilegia coerulea]	NA	16.565	2.94291	28.6741	3.55276	0.639975	5.12927	0.571875	1.06685	0.854317	1.90482e-06	5.00902e-05	yes
gene-GIB67_008890	GIB67_008890	30510	rna-gnl|WGS:JACGCM|KingUnif21273.1	NA	NA	NA	NA	hypothetical protein AQUCO_07300004v1 [Aquilegia coerulea]	NA	0	0	0	0	0.121232	0.283105	3.93041	3.45761	0.057497	1.90725e-06	5.00902e-05	yes
gene-GIB67_037150	GIB67_037150	19430	rna-gnl|WGS:JACGCM|KingUnif05918.1	GO:0003700(DNA binding transcription factor activity);GO:0005634(nucleus);GO:0006351(transcription, DNA-templated);GO:0006355(regulation of transcription, DNA-templated);GO:0006952(defense response);GO:0010150(leaf senescence);GO:0010200(response to chitin);GO:0043565(sequence-specific DNA binding)	04016(MAPK signaling pathway - plant);04626(Plant-pathogen interaction)	K13425	NA	WRKY transcription factor 22 [Vitis vinifera]	NA	9.30979	278.298	222.945	296.653	242.036	316.587	3.86737	15.1518	4.15057	1.90808e-06	5.00902e-05	yes
gene-GIB67_027175	GIB67_027175	3971	rna-gnl|WGS:JACGCM|KingUnif02709.1	GO:0004867(serine-type endopeptidase inhibitor activity);GO:0005576(extracellular region);GO:0005618(cell wall);GO:0006508(proteolysis);GO:0008233(peptidase activity);GO:0009611(response to wounding);GO:0050832(defense response to fungus)	NA	NA	NA	Proteinase inhibitor I13 [Macleaya cordata]	NA	30.6372	154.436	97.0233	12.866	34.9958	13.4378	225.92	172.26	218.14	1.91945e-06	5.03262e-05	yes
gene-GIB67_039572	GIB67_039572	2138	rna-gnl|WGS:JACGCM|KingUnif18693.1	GO:0005886(plasma membrane);GO:0006810(transport);GO:0022857(transmembrane transporter activity)	NA	NA	NA	Drug/metabolite transporter [Macleaya cordata]	NA	0.8024	0.064695	2.60609	0	0	0.031314	0	0	0	1.94691e-06	5.09831e-05	yes
gene-GIB67_003577	GIB67_003577	23845	rna-gnl|WGS:JACGCM|KingUnif00085.1	GO:0005929(cilium);GO:0030991(intraciliary transport particle A);GO:0035721(intraciliary retrograde transport);GO:0060271(cilium assembly);GO:0061512(protein localization to cilium)	NA	NA	NA	hypothetical protein BVC80_8825g9 [Macleaya cordata]	NA	1.40468	6.46149	22.2362	0.466344	0.144342	0.975337	0.800137	1.13966	0.469934	1.98113e-06	5.18151e-05	yes
gene-GIB67_003764	GIB67_003764	1147	rna-gnl|WGS:JACGCM|KingUnif36794.1	GO:0000287(magnesium ion binding);GO:0008152(metabolic process);GO:0009507(chloroplast);GO:0010333(terpene synthase activity);GO:0016114(terpenoid biosynthetic process);GO:0034007(S-linalool synthase activity);GO:0043693(monoterpene biosynthetic process)	00902(Monoterpenoid biosynthesis)	K15086	EC:4.2.3.25	(3S,6E)-nerolidol synthase 1, chloroplastic [Vitis vinifera]	NA	0.688733	7.42004	4.30932	1.69242	0.60739	0.958073	0	0.119496	0.053969	2.00499e-06	5.23745e-05	yes
gene-GIB67_034162	GIB67_034162	31790	rna-gnl|WGS:JACGCM|KingUnif00768.1	GO:0000779(condensed chromosome, centromeric region);GO:0000799(nuclear condensin complex);GO:0003682(chromatin binding);GO:0007076(mitotic chromosome condensation);GO:0010032(meiotic chromosome condensation);GO:0042393(histone binding);GO:0051304(chromosome separation)	NA	NA	NA	Condensin complex [Macleaya cordata]	NA	0.209775	0.070586	0.03974	7.17606	0.357349	5.77048	0.846626	0.820177	1.05308	2.0217e-06	5.27459e-05	yes
gene-GIB67_041754	GIB67_041754	6063	rna-gnl|WGS:JACGCM|KingUnif33905.1	GO:0003674(molecular_function);GO:0005634(nucleus);GO:0005829(cytosol);GO:0005886(plasma membrane);GO:0008150(biological_process);GO:0016021(integral component of membrane)	04144(Endocytosis)	K05747	NA	hypothetical protein AQUCO_00100008v1 [Aquilegia coerulea]	NA	0.96096	23.5083	44.6364	7.55433	12.759	17.2453	1.0802	0.500376	0.730374	2.03136e-06	5.29165e-05	yes
gene-GIB67_036945	GIB67_036945	5910	rna-gnl|WGS:JACGCM|KingUnif30125.1	GO:0004497(monooxygenase activity);GO:0055114(oxidation-reduction process)	00380(Tryptophan metabolism)	K11816	EC:1.14.13.168	hypothetical protein AQUCO_00300896v1 [Aquilegia coerulea]	NA	0.806766	0.044178	0	4.55013	14.22	17.7472	34.2341	30.6122	8.39878	2.03323e-06	5.29165e-05	yes
gene-GIB67_035106	GIB67_035106	12509	rna-gnl|WGS:JACGCM|KingUnif01978.1	GO:0003674(molecular_function);GO:0008150(biological_process)	NA	NA	NA	hypothetical protein AQUCO_02400058v1 [Aquilegia coerulea]	NA	2.37511	124.091	22.9402	2.06456	9.3217	7.97613	0	0.762883	0.833513	2.03965e-06	5.30183e-05	yes
gene-GIB67_013579	GIB67_013579	43058	rna-gnl|WGS:JACGCM|KingUnif10548.1	GO:0003677(DNA binding);GO:0003700(DNA binding transcription factor activity);GO:0005634(nucleus);GO:0006351(transcription, DNA-templated);GO:0006355(regulation of transcription, DNA-templated);GO:0007275(multicellular organism development);GO:0008283(cell proliferation);GO:0043565(sequence-specific DNA binding);GO:0071365(cellular response to auxin stimulus)	03013(RNA transport);03015(mRNA surveillance pathway);03018(RNA degradation)	K13126	NA	NAC domain [Macleaya cordata]	NA	2.07684	49.0788	30.1885	0.601423	1.19336	1.1249	4.0647	13.8958	1.90539	2.05971e-06	5.3414e-05	yes
gene-GIB67_006146	GIB67_006146	32571	rna-gnl|WGS:JACGCM|KingUnif13606.1	GO:0003674(molecular_function);GO:0005634(nucleus);GO:0009626(plant-type hypersensitive response)	NA	NA	NA	PREDICTED: MACPF domain-containing protein At1g14780 [Nelumbo nucifera]	NA	1.49135	35.9863	86.0033	21.7781	17.8593	34.5394	0.503785	1.5269	1.697	2.05991e-06	5.3414e-05	yes
gene-GIB67_005915	GIB67_005915	24862	rna-gnl|WGS:JACGCM|KingUnif19974.1	GO:0004012(phospholipid-translocating ATPase activity);GO:0005802(trans-Golgi network);GO:0005886(plasma membrane);GO:0048194(Golgi vesicle budding)	NA	NA	NA	PREDICTED: probable phospholipid-transporting ATPase 4 [Nelumbo nucifera]	NA	0.356372	0.071638	0.069286	4.55148	1.9733	4.0869	2.2078	1.05467	3.07596	2.06794e-06	5.35567e-05	yes
gene-GIB67_023155	GIB67_023155	27043	rna-gnl|WGS:JACGCM|KingUnif19756.1	GO:0005515(protein binding);GO:0009507(chloroplast);GO:0009535(chloroplast thylakoid membrane);GO:0009579(thylakoid);GO:0009735(response to cytokinin);GO:0016021(integral component of membrane);GO:0061635(regulation of protein complex stability)	NA	NA	NA	hypothetical protein AQUCO_00400698v1 [Aquilegia coerulea]	NA	27.2473	2.66778	58.4862	6.18337	0.429596	2.10324	1.43982	1.2483	1.40298	2.1365e-06	5.52646e-05	yes
gene-GIB67_042255	GIB67_042255	36312	rna-gnl|WGS:JACGCM|KingUnif33364.1	GO:0005886(plasma membrane)	NA	NA	NA	PREDICTED: rust resistance kinase Lr10-like [Vitis vinifera]	NA	11.1392	0.620211	16.6963	0.438338	0.252541	0.704473	1.63617	0.616049	1.00001	2.1568e-06	5.57216e-05	yes
gene-GIB67_013101	GIB67_013101	8431	rna-gnl|WGS:JACGCM|KingUnif12074.1	GO:0005524(ATP binding);GO:0005739(mitochondrion);GO:0006952(defense response);GO:0043531(ADP binding)	04626(Plant-pathogen interaction)	K13459	NA	disease resistance-like protein [Cinnamomum micranthum f. kanehirae]	NA	1.05623	1.67718	1.32831	2.27418	1.51994	2.89262	0.118432	0.185295	0.039609	2.19632e-06	5.66737e-05	yes
gene-GIB67_020575	GIB67_020575	6068	rna-gnl|WGS:JACGCM|KingUnif20488.1	GO:0004672(protein kinase activity);GO:0004674(protein serine/threonine kinase activity);GO:0005524(ATP binding);GO:0005886(plasma membrane);GO:0006468(protein phosphorylation);GO:0009755(hormone-mediated signaling pathway);GO:0016021(integral component of membrane);GO:0016301(kinase activity);GO:0042803(protein homodimerization activity)	NA	NA	NA	PREDICTED: serine/threonine-protein kinase-like protein CCR4 [Juglans regia]	NA	0.981097	65.0128	50.4435	11.5013	13.5358	13.1399	0.651875	2.09229	0.869246	2.23541e-06	5.76121e-05	yes
gene-GIB67_002153	GIB67_002153	42366	rna-gnl|WGS:JACGCM|KingUnif09766.1	GO:0005215(transporter activity);GO:0005886(plasma membrane);GO:0006857(oligopeptide transport);GO:0010447(response to acidic pH);GO:0010542(nitrate efflux transmembrane transporter activity);GO:0015706(nitrate transport);GO:0016020(membrane);GO:0016021(integral component of membrane);GO:0022857(transmembrane transporter activity);GO:0042128(nitrate assimilation);GO:0055085(transmembrane transpor…	NA	NA	NA	hypothetical protein AQUCO_00400046v1 [Aquilegia coerulea]	NA	4.85586	155.764	27.8367	12.4084	14.4644	24.6868	2.23931	3.53615	2.73187	2.24337e-06	5.7747e-05	yes
gene-GIB67_000952	GIB67_000952	23356	rna-gnl|WGS:JACGCM|KingUnif06813.1	GO:0016787(hydrolase activity)	NA	NA	NA	PREDICTED: probable lysophospholipase BODYGUARD 2 [Nelumbo nucifera]	NA	0.682527	0	0.135697	7.4762	0.375597	19.1158	0	0	0.093179	2.25323e-06	5.79304e-05	yes
gene-GIB67_002060	GIB67_002060	42274	rna-gnl|WGS:JACGCM|KingUnif42100.1	GO:0005886(plasma membrane);GO:0006952(defense response)	NA	NA	NA	PREDICTED: MLO-like protein 3 [Nelumbo nucifera]	NA	0.460341	0.210735	0.791703	5.41279	8.56405	6.38406	3.53086	11.4767	2.94999	2.26533e-06	5.8171e-05	yes
gene-GIB67_013822	GIB67_013822	15406	rna-gnl|WGS:JACGCM|KingUnif02744.1	GO:0000139(Golgi membrane);GO:0005768(endosome);GO:0005794(Golgi apparatus);GO:0005802(trans-Golgi network);GO:0006004(fucose metabolic process);GO:0009505(plant-type cell wall);GO:0010412(mannan metabolic process);GO:0016021(integral component of membrane);GO:0016757(transferase activity, transferring glycosyl groups);GO:0051753(mannan synthase activity);GO:0052325(cell wall pectin biosynthetic …	NA	NA	NA	GDP-fucose protein O-fucosyltransferase [Macleaya cordata]	NA	16.5535	2.76323	2.86483	31.8353	27.3697	53.7292	127.831	66.9036	101.527	2.2734e-06	5.83074e-05	yes
gene-GIB67_033351	GIB67_033351	31116	rna-gnl|WGS:JACGCM|KingUnif30748.1	GO:0051213(dioxygenase activity)	00941(Flavonoid biosynthesis)	K05278	EC:1.14.20.6	PREDICTED: flavonol synthase/flavanone 3-hydroxylase [Eucalyptus grandis]	NA	0.711477	1.90818	0	68.5543	13.7609	71.0721	8.16023	2.4965	16.2008	2.27678e-06	5.83235e-05	yes
gene-GIB67_041279	GIB67_041279	10081	rna-gnl|WGS:JACGCM|KingUnif30979.1	GO:0003959(NADPH dehydrogenase activity);GO:0005622(intracellular);GO:0055114(oxidation-reduction process)	00592(alpha-Linolenic acid metabolism)	K05894	EC:1.3.1.42	12-oxophytodienoate reductase 2-like [Quercus suber]	NA	14.5031	37.814	35.8589	45.13	49.5867	181.747	416.932	720.514	177.594	2.29734e-06	5.87403e-05	yes
gene-GIB67_035445	GIB67_035445	4277	rna-gnl|WGS:JACGCM|KingUnif38001.1	GO:0005887(integral component of plasma membrane);GO:0015116(sulfate transmembrane transporter activity)	NA	NA	NA	PREDICTED: probable sulfate transporter 3.5 isoform X1 [Nelumbo nucifera]	NA	7.97138	5.20301	1.8081	0.028481	0.425861	0.188912	0.339559	0.911311	0.155668	2.30081e-06	5.87403e-05	yes
gene-GIB67_023232	GIB67_023232	38013	rna-gnl|WGS:JACGCM|KingUnif04953.1	GO:0005198(structural molecule activity);GO:0009507(chloroplast);GO:0009534(chloroplast thylakoid);GO:0009535(chloroplast thylakoid membrane);GO:0009941(chloroplast envelope);GO:0016020(membrane)	NA	NA	NA	PREDICTED: probable plastid-lipid-associated protein 12, chloroplastic isoform X1 [Nelumbo nucifera]	NA	3.26411	0.719686	6.36671	0.797066	0.066082	0.544072	0.0439	0.06499	0.099044	2.30137e-06	5.87403e-05	yes
gene-GIB67_031235	GIB67_031235	9596	rna-gnl|WGS:JACGCM|KingUnif22950.1	GO:0003674(molecular_function);GO:0008150(biological_process);GO:0009507(chloroplast);GO:0016021(integral component of membrane)	NA	NA	NA	uncharacterized protein LOC107430433 [Ziziphus jujuba]	NA	4.59349	3.0371	3.58342	18.5058	53.6163	5.50304	1.08126	4.16355	2.40344	2.35149e-06	5.99342e-05	yes
gene-GIB67_029343	GIB67_029343	13681	rna-gnl|WGS:JACGCM|KingUnif29697.1	GO:0000741(karyogamy);GO:0003677(DNA binding);GO:0003700(DNA binding transcription factor activity);GO:0005634(nucleus);GO:0010197(polar nucleus fusion)	NA	NA	NA	High mobility group box domain [Macleaya cordata]	NA	0.31526	0.103105	0.23902	20.6352	0.167747	17.4475	1.59851	0.925253	0.791039	2.3538e-06	5.99342e-05	yes
gene-GIB67_027943	GIB67_027943	35456	rna-gnl|WGS:JACGCM|KingUnif21463.1	GO:0003674(molecular_function);GO:0005739(mitochondrion);GO:0008150(biological_process);GO:0016021(integral component of membrane)	NA	NA	NA	hypothetical protein AQUCO_01800149v1 [Aquilegia coerulea]	NA	21.0646	27.1238	36.7539	0.08579	1.06036	0.816535	2.41841	11.9566	0.3492	2.36987e-06	6.0271e-05	yes
gene-GIB67_027967	GIB67_027967	35477	rna-gnl|WGS:JACGCM|KingUnif40368.1	GO:0003723(RNA binding);GO:0003735(structural constituent of ribosome);GO:0006412(translation);GO:0022625(cytosolic large ribosomal subunit);GO:0042254(ribosome biogenesis)	NA	NA	NA	PREDICTED: uncharacterized protein LOC100249551 [Vitis vinifera]	NA	0.388424	0.170963	0.057811	7.22701	1.78398	7.11369	0.45331	1.58834	0.733799	2.37317e-06	6.02826e-05	yes
gene-GIB67_023204	GIB67_023204	24703	rna-gnl|WGS:JACGCM|KingUnif32088.1	GO:0005768(endosome);GO:0005794(Golgi apparatus);GO:0005802(trans-Golgi network);GO:0005886(plasma membrane);GO:0016021(integral component of membrane);GO:0048544(recognition of pollen)	NA	NA	NA	hypothetical protein AQUCO_01900013v1 [Aquilegia coerulea]	NA	1.49229	227.618	62.0383	8.27422	8.2046	7.75823	3.29412	8.26912	2.86913	2.39557e-06	6.07785e-05	yes
gene-GIB67_001049	GIB67_001049	23451	rna-gnl|WGS:JACGCM|KingUnif22777.1	GO:0005887(integral component of plasma membrane);GO:0006857(oligopeptide transport);GO:0015031(protein transport);GO:0016020(membrane);GO:0035673(oligopeptide transmembrane transporter activity)	NA	NA	NA	hypothetical protein AQUCO_05100031v1 [Aquilegia coerulea]	NA	0.129597	0	0	0.756823	0.446343	1.39169	2.80387	24.0747	0.285697	2.44083e-06	6.18528e-05	yes
gene-GIB67_014132	GIB67_014132	15249	rna-gnl|WGS:JACGCM|KingUnif10058.1	GO:0005215(transporter activity);GO:0016021(integral component of membrane);GO:0098656(anion transmembrane transport)	NA	NA	NA	tonoplast dicarboxylate transporter-like [Prunus yedoensis var. nudiflora]	NA	12.2084	48.1878	142.308	4.54929	0.781489	11.0079	7.96783	0.925361	1.13635	2.44928e-06	6.19928e-05	yes
gene-GIB67_027788	GIB67_027788	237	rna-gnl|WGS:JACGCM|KingUnif20389.1	GO:0003689(DNA clamp loader activity);GO:0005663(DNA replication factor C complex);GO:0006261(DNA-dependent DNA replication)	NA	NA	NA	AAA+ ATPase domain [Macleaya cordata]	NA	0	0	0.066488	6.99339	0.0838	9.07095	0.35249	0.074733	0.947543	2.45287e-06	6.20097e-05	yes
gene-GIB67_024804	GIB67_024804	4839	rna-gnl|WGS:JACGCM|KingUnif01259.1	GO:0004674(protein serine/threonine kinase activity);GO:0005524(ATP binding);GO:0005886(plasma membrane);GO:0016021(integral component of membrane);GO:0016301(kinase activity);GO:0046777(protein autophosphorylation)	NA	NA	NA	PREDICTED: probable receptor-like protein kinase At2g42960 [Vitis vinifera]	NA	6.55157	5.59107	3.19068	40.7682	19.8982	43.8206	17.7968	16.0029	18.7639	2.48158e-06	6.26606e-05	yes
gene-GIB67_026609	GIB67_026609	1202	rna-gnl|WGS:JACGCM|KingUnif36375.1	GO:0003680(AT DNA binding);GO:0003700(DNA binding transcription factor activity);GO:0005515(protein binding);GO:0005634(nucleus);GO:0006351(transcription, DNA-templated);GO:0006355(regulation of transcription, DNA-templated);GO:0009938(negative regulation of gibberellic acid mediated signaling pathway);GO:0043621(protein self-association)	NA	NA	NA	PREDICTED: AT-hook motif nuclear-localized protein 15-like [Nelumbo nucifera]	NA	0.064263	2.36358	0.156749	14.6059	39.8928	25.5255	25.498	21.4188	25.6162	2.53792e-06	6.39579e-05	yes
gene-GIB67_040226	GIB67_040226	18594	rna-gnl|WGS:JACGCM|KingUnif03824.1	GO:0005618(cell wall);GO:0009506(plasmodesma);GO:0010497(plasmodesmata-mediated intercellular transport);GO:0033609(oxalate metabolic process);GO:0046564(oxalate decarboxylase activity);GO:2000280(regulation of root development)	NA	NA	NA	PREDICTED: germin-like protein subfamily 2 member 1 [Juglans regia]	NA	2.45702	0.873607	0.860937	7.59682	15.3587	6.63243	14.282	33.8686	13.0408	2.53899e-06	6.39579e-05	yes
gene-GIB67_038266	GIB67_038266	19381	rna-gnl|WGS:JACGCM|KingUnif10915.1	GO:0000103(sulfate assimilation);GO:0005737(cytoplasm);GO:0005829(cytosol);GO:0006535(cysteine biosynthetic process from serine);GO:0009001(serine O-acetyltransferase activity);GO:0016407(acetyltransferase activity);GO:0019344(cysteine biosynthetic process)	00920(Sulfur metabolism);00270(Cysteine and methionine metabolism)	K00640	EC:2.3.1.30	hypothetical protein AQUCO_01500394v1 [Aquilegia coerulea]	NA	0.649288	19.2014	17.4991	2.03911	0.968554	2.30655	0.477438	0.33033	0.790174	2.55809e-06	6.43624e-05	yes
gene-GIB67_002799	GIB67_002799	27090	rna-gnl|WGS:JACGCM|KingUnif14871.1	GO:0006999(nuclear pore organization);GO:0017056(structural constituent of nuclear pore);GO:0044611(nuclear pore inner ring)	NA	NA	NA	EEIG1/EHBP1 N-terminal domain [Macleaya cordata]	NA	1.54948	0.438184	0.55415	14.4678	2.00174	18.1109	19.5785	9.31375	9.13747	2.59474e-06	6.5207e-05	yes
gene-GIB67_041216	GIB67_041216	29790	rna-gnl|WGS:JACGCM|KingUnif37254.1	NA	NA	NA	NA	PREDICTED: uncharacterized protein LOC105055126 [Elaeis guineensis]	NA	2.09957	0	0	0	0	0	9.50985	4.755	6.86907	2.60919e-06	6.54925e-05	yes
gene-GIB67_012201	GIB67_012201	11680	rna-gnl|WGS:JACGCM|KingUnif40999.1	GO:0005737(cytoplasm)	NA	NA	NA	uncharacterized protein LOC105629574 [Jatropha curcas]	NA	0.921497	0.934043	39.0144	0	0	0.359647	0	0.09985	0	2.6231e-06	6.5744e-05	yes
gene-GIB67_041291	GIB67_041291	10097	rna-gnl|WGS:JACGCM|KingUnif13451.1	GO:0005515(protein binding)	NA	NA	NA	hypothetical protein DVH24_041872 [Malus domestica]	NA	0.295853	4.39773	9.69584	2.44672	3.53188	13.2459	0	0	0.077546	2.62541e-06	6.5744e-05	yes
gene-GIB67_025356	GIB67_025356	12719	rna-gnl|WGS:JACGCM|KingUnif32029.1	GO:0004497(monooxygenase activity);GO:0010268(brassinosteroid homeostasis);GO:0016131(brassinosteroid metabolic process)	00905(Brassinosteroid biosynthesis)	K15639	EC:1.14.-.-	PREDICTED: cytochrome P450 734A1-like [Nelumbo nucifera]	NA	2.74854	4.86108	2.97393	8.52483	31.707	22.1806	3.3662	5.13103	4.06705	2.62906e-06	6.57576e-05	yes
gene-GIB67_026269	GIB67_026269	37800	rna-gnl|WGS:JACGCM|KingUnif08467.1	NA	NA	NA	NA	PREDICTED: uncharacterized protein LOC104596812 [Nelumbo nucifera]	NA	0	0	0.249084	1.6135	3.78346	24.5867	19.5576	12.285	3.68902	2.67533e-06	6.6836e-05	yes
gene-GIB67_026052	GIB67_026052	27916	rna-gnl|WGS:JACGCM|KingUnif18233.1	GO:0005887(integral component of plasma membrane);GO:0015116(sulfate transmembrane transporter activity)	NA	NA	NA	PREDICTED: sulfate transporter 1.3-like [Nelumbo nucifera]	NA	9.24611	78.8199	29.9159	6.08144	10.3971	6.15045	1.53087	6.31906	1.06213	2.69362e-06	6.7196e-05	yes
gene-GIB67_010741	GIB67_010741	38126	rna-gnl|WGS:JACGCM|KingUnif08649.1	GO:0000139(Golgi membrane);GO:0005634(nucleus);GO:0005794(Golgi apparatus);GO:0005982(starch metabolic process);GO:0009058(biosynthetic process);GO:0009834(plant-type secondary cell wall biogenesis);GO:0010417(glucuronoxylan biosynthetic process);GO:0015020(glucuronosyltransferase activity);GO:0016021(integral component of membrane);GO:0016757(transferase activity, transferring glycosyl groups);G…	NA	NA	NA	hypothetical protein AQUCO_01500079v1 [Aquilegia coerulea]	NA	0	0	0	0.088442	0.096505	0.073478	0.322183	1.53973	0.498039	2.69609e-06	6.7196e-05	yes
gene-GIB67_013037	GIB67_013037	24606	rna-gnl|WGS:JACGCM|KingUnif12229.1	GO:0005507(copper ion binding);GO:0005576(extracellular region);GO:0006809(nitric oxide biosynthetic process);GO:0008131(primary amine oxidase activity);GO:0009308(amine metabolic process);GO:0009738(abscisic acid-activated signaling pathway);GO:0048038(quinone binding);GO:0052593(tryptamine:oxygen oxidoreductase (deaminating) activity);GO:0052594(aminoacetone:oxygen oxidoreductase(deaminating) a…	00260(Glycine, serine and threonine metabolism);00350(Tyrosine metabolism);00360(Phenylalanine metabolism);00410(beta-Alanine metabolism);00950(Isoquinoline alkaloid biosynthesis);00960(Tropane, piperidine and pyridine alkaloid biosynthesis)	K00276	EC:1.4.3.21	Copper amine oxidase [Macleaya cordata]	NA	0.564003	2.18438	16.1355	0.13243	0	0.270028	0.058406	0.185252	0	2.72332e-06	6.7795e-05	yes
gene-GIB67_019070	GIB67_019070	16732	rna-gnl|WGS:JACGCM|KingUnif42749.1	GO:0004497(monooxygenase activity);GO:0005506(iron ion binding);GO:0005783(endoplasmic reticulum);GO:0016021(integral component of membrane);GO:0016705(oxidoreductase activity, acting on paired donors, with incorporation or reduction of molecular oxygen);GO:0019825(oxygen binding);GO:0020037(heme binding);GO:0055114(oxidation-reduction process)	00071(Fatty acid degradation);00073(Cutin, suberine and wax biosynthesis)	K20495	EC:1.14.14.80	hypothetical protein AQUCO_01300516v1 [Aquilegia coerulea]	NA	0	0	0	0	0.318952	0.549589	0.676004	5.94379	0.304584	2.76399e-06	6.87098e-05	yes
gene-GIB67_025617	GIB67_025617	38231	rna-gnl|WGS:JACGCM|KingUnif27707.1	GO:0016020(membrane);GO:0016709(oxidoreductase activity, acting on paired donors, with incorporation or reduction of molecular oxygen, NAD(P)H as one donor, and incorporation of one atom of oxygen);GO:0044550(secondary metabolite biosynthetic process)	NA	NA	NA	cytochrome P450 82C4-like protein [Cinnamomum micranthum f. kanehirae]	NA	0.043663	1.1459	1.1909	0.592258	5.76142	9.65614	27.7687	42.3528	11.2922	2.76899e-06	6.87098e-05	yes
gene-GIB67_040323	GIB67_040323	38821	rna-gnl|WGS:JACGCM|KingUnif32033.1	GO:0005515(protein binding);GO:0008150(biological_process);GO:0009507(chloroplast);GO:0009535(chloroplast thylakoid membrane);GO:0009570(chloroplast stroma)	NA	NA	NA	PREDICTED: zeaxanthin epoxidase, chloroplastic isoform X1 [Nelumbo nucifera]	NA	3.31245	0.078309	10.7929	0.171474	0.125952	0.085596	0.040019	0.259546	0.251361	2.7698e-06	6.87098e-05	yes
gene-GIB67_021630	GIB67_021630	38908	rna-gnl|WGS:JACGCM|KingUnif17941.1	GO:0003713(transcription coactivator activity);GO:0005515(protein binding);GO:0005622(intracellular);GO:0005634(nucleus);GO:0006266(DNA ligation);GO:0006281(DNA repair);GO:0006303(double-strand break repair via nonhomologous end joining);GO:0010385(double-stranded methylated DNA binding);GO:0080111(DNA demethylation);GO:1901969(positive regulation of polynucleotide 3'-phosphatase activity);GO:190…	03410(Base excision repair)	K10803	NA	BRCT domain [Macleaya cordata]	NA	7.44066	0	0	0	0	0	14.1817	12.9719	25.5398	2.78354e-06	6.897e-05	yes
gene-GIB67_011794	GIB67_011794	5264	rna-gnl|WGS:JACGCM|KingUnif31152.1	GO:0003674(molecular_function);GO:0005634(nucleus);GO:0048235(pollen sperm cell differentiation)	NA	NA	NA	Protein of unknown function DUF3741 [Macleaya cordata]	NA	5.893	14.2	17.162	1.72945	2.41428	1.94987	2.79828	3.42498	3.40499	2.81328e-06	6.96255e-05	yes
gene-GIB67_030298	GIB67_030298	26643	rna-gnl|WGS:JACGCM|KingUnif09716.1	GO:0005618(cell wall);GO:0009506(plasmodesma);GO:0010497(plasmodesmata-mediated intercellular transport);GO:0033609(oxalate metabolic process);GO:0046564(oxalate decarboxylase activity);GO:2000280(regulation of root development)	NA	NA	NA	germin-like protein subfamily 2 member 4 [Manihot esculenta]	NA	0.809975	2.25363	2.73241	115.065	12.1512	35.0712	29.8964	7.55898	253.156	2.82498e-06	6.98334e-05	yes
gene-GIB67_020109	GIB67_020109	40446	rna-gnl|WGS:JACGCM|KingUnif29885.1	GO:0016787(hydrolase activity)	00330(Arginine and proline metabolism)	K01259	EC:3.4.11.5	proline iminopeptidase isoform X1 [Arachis ipaensis]	NA	0	0	0	0	0	23.7281	39.1422	52.4573	22.7663	2.82967e-06	6.98677e-05	yes
gene-GIB67_016925	GIB67_016925	27766	rna-gnl|WGS:JACGCM|KingUnif15137.1	GO:0003689(DNA clamp loader activity);GO:0003887(DNA-directed DNA polymerase activity);GO:0005524(ATP binding);GO:0005634(nucleus);GO:0005663(DNA replication factor C complex);GO:0005886(plasma membrane);GO:0006261(DNA-dependent DNA replication);GO:0006281(DNA repair);GO:0009360(DNA polymerase III complex);GO:0010026(trichome differentiation);GO:0010091(trichome branching)	03030(DNA replication);03420(Nucleotide excision repair);03430(Mismatch repair)	K10756	NA	hypothetical protein AQUCO_01700020v1 [Aquilegia coerulea]	NA	0.303712	0.416245	0.237177	0.534576	0.169561	1.07319	6.2063	2.59257	3.53277	2.85277e-06	7.03189e-05	yes
gene-GIB67_030537	GIB67_030537	39536	rna-gnl|WGS:JACGCM|KingUnif12464.1	GO:0004601(peroxidase activity);GO:0009505(plant-type cell wall);GO:0009664(plant-type cell wall organization)	00940(Phenylpropanoid biosynthesis)	K00430	EC:1.11.1.7	PREDICTED: peroxidase 5-like [Vitis vinifera]	NA	0	0	0	0.198627	0.468835	1.49732	0.819551	3.46059	0.711638	2.85458e-06	7.03189e-05	yes
gene-GIB67_033264	GIB67_033264	20436	rna-gnl|WGS:JACGCM|KingUnif34319.1	GO:0005794(Golgi apparatus);GO:0016021(integral component of membrane);GO:0016757(transferase activity, transferring glycosyl groups)	00514(Other types of O-glycan biosynthesis)	K13675	EC:2.4.1.-	Protein of unknown function DUF604 [Macleaya cordata]	NA	0	0	0	3.38057	0	3.96135	0.551229	0.101145	0.242856	2.90959e-06	7.15908e-05	yes
gene-GIB67_031964	GIB67_031964	6688	rna-gnl|WGS:JACGCM|KingUnif18054.1	GO:0003333(amino acid transmembrane transport);GO:0005886(plasma membrane);GO:0015171(amino acid transmembrane transporter activity)	NA	NA	NA	hypothetical protein AQUCO_01400338v1 [Aquilegia coerulea]	NA	14.6343	540.806	302.573	21.3802	138.08	63.5705	2.32528	11.1532	3.09224	2.91626e-06	7.16717e-05	yes
gene-GIB67_018127	GIB67_018127	308	rna-gnl|WGS:JACGCM|KingUnif15834.1	GO:0009813(flavonoid biosynthetic process);GO:0043231(intracellular membrane-bounded organelle);GO:0052696(flavonoid glucuronidation);GO:0080043(quercetin 3-O-glucosyltransferase activity);GO:0080044(quercetin 7-O-glucosyltransferase activity)	NA	NA	NA	LOW QUALITY PROTEIN: cinnamate beta-D-glucosyltransferase [Cinnamomum micranthum f. kanehirae]	NA	0.446129	0.198157	0.135572	2.39897	0.941687	0.762728	3.30362	6.84471	5.16074	2.9289e-06	7.18989e-05	yes
gene-GIB67_012229	GIB67_012229	10347	rna-gnl|WGS:JACGCM|KingUnif08576.1	GO:0005618(cell wall);GO:0009506(plasmodesma);GO:0010497(plasmodesmata-mediated intercellular transport);GO:0033609(oxalate metabolic process);GO:0046564(oxalate decarboxylase activity);GO:2000280(regulation of root development)	NA	NA	NA	PREDICTED: germin-like protein subfamily 2 member 1 [Juglans regia]	NA	0.905117	0.359637	1.48028	7.53809	15.0894	4.05694	14.1802	16.9093	11.7325	2.96597e-06	7.27246e-05	yes
gene-GIB67_014553	GIB67_014553	36872	rna-gnl|WGS:JACGCM|KingUnif14163.1	GO:0003674(molecular_function);GO:0005576(extracellular region);GO:0005615(extracellular space);GO:0005618(cell wall);GO:0005794(Golgi apparatus);GO:0005829(cytosol);GO:0009505(plant-type cell wall);GO:0009741(response to brassinosteroid);GO:0048046(apoplast)	NA	NA	NA	Phosphate-induced protein 1 [Macleaya cordata]	NA	36.1999	922.884	684.312	490.849	420.242	594.434	11.9427	17.1141	26.3924	2.97165e-06	7.27797e-05	yes
gene-GIB67_036640	GIB67_036640	30029	rna-gnl|WGS:JACGCM|KingUnif21563.1	GO:0005794(Golgi apparatus);GO:0016413(O-acetyltransferase activity);GO:0071554(cell wall organization or biogenesis)	NA	NA	NA	hypothetical protein AQUCO_00400450v1 [Aquilegia coerulea]	NA	0	0	0	0	0.072676	0.158693	0.941125	1.54361	1.02977	3.07506e-06	7.52254e-05	yes
gene-GIB67_035581	GIB67_035581	36663	rna-gnl|WGS:JACGCM|KingUnif21181.1	GO:0003674(molecular_function);GO:0005634(nucleus);GO:0009734(auxin-activated signaling pathway)	NA	NA	NA	Protein BIG GRAIN 1-like A [Vitis vinifera]	NA	6.65299	89.5112	65.6377	8.03799	3.92571	4.20232	2.86029	11.4891	2.25303	3.11276e-06	7.60597e-05	yes
gene-GIB67_031548	GIB67_031548	431	rna-gnl|WGS:JACGCM|KingUnif27702.1	GO:0016787(hydrolase activity)	00590(Arachidonic acid metabolism);04146(Peroxisome)	K08726	EC:3.3.2.10;EC:3.1.3.76	PREDICTED: bifunctional epoxide hydrolase 2-like [Nelumbo nucifera]	NA	5.89221	0.277571	2.35811	9.98627	16.3659	24.2802	60.3811	46.1524	36.9992	3.12904e-06	7.63695e-05	yes
gene-GIB67_042382	GIB67_042382	10874	rna-gnl|WGS:JACGCM|KingUnif02557.1	GO:0004185(serine-type carboxypeptidase activity);GO:0005773(vacuole);GO:0051603(proteolysis involved in cellular protein catabolic process)	NA	NA	NA	Peptidase S10 [Macleaya cordata]	NA	11.183	5.2348	9.4764	0.233664	0.318079	0.757905	3.5244	0.336619	0.588064	3.15635e-06	7.69474e-05	yes
gene-GIB67_005765	GIB67_005765	42840	rna-gnl|WGS:JACGCM|KingUnif11568.1	GO:0005886(plasma membrane)	NA	NA	NA	KIP1-like [Macleaya cordata]	NA	0.315102	28.3514	12.2902	33.8736	16.409	24.0547	0.10574	0.627365	0.081134	3.16728e-06	7.71251e-05	yes
gene-GIB67_032075	GIB67_032075	17692	rna-gnl|WGS:JACGCM|KingUnif29094.1	GO:0003677(DNA binding);GO:0003700(DNA binding transcription factor activity);GO:0005634(nucleus);GO:0006351(transcription, DNA-templated);GO:0009908(flower development);GO:0045892(negative regulation of transcription, DNA-templated);GO:0046872(metal ion binding);GO:1902455(negative regulation of stem cell population maintenance)	04712(Circadian rhythm - plant)	K16222	NA	hypothetical protein AQUCO_02100236v1 [Aquilegia coerulea]	NA	38.1052	109.176	106.265	3.51176	3.82446	6.3527	21.9613	129.286	12.716	3.17643e-06	7.72592e-05	yes
gene-GIB67_042299	GIB67_042299	36355	rna-gnl|WGS:JACGCM|KingUnif11793.1	GO:0003677(DNA binding);GO:0003700(DNA binding transcription factor activity);GO:0005634(nucleus);GO:0006351(transcription, DNA-templated);GO:0006355(regulation of transcription, DNA-templated);GO:0009873(ethylene-activated signaling pathway);GO:0010200(response to chitin)	NA	NA	NA	AP2/ERF domain [Macleaya cordata]	NA	0.555583	0.050178	1.0059	6.27449	3.99204	2.87151	0	0.077407	0.108368	3.22418e-06	7.83306e-05	yes
gene-GIB67_031029	GIB67_031029	10938	rna-gnl|WGS:JACGCM|KingUnif12680.1	GO:0003677(DNA binding);GO:0003700(DNA binding transcription factor activity);GO:0005634(nucleus);GO:0006351(transcription, DNA-templated);GO:0006355(regulation of transcription, DNA-templated);GO:0007389(pattern specification process);GO:0009734(auxin-activated signaling pathway);GO:0009738(abscisic acid-activated signaling pathway);GO:0009743(response to carbohydrate);GO:0010154(fruit developme…	04075(Plant hormone signal transduction)	K14486	NA	PREDICTED: auxin response factor 18-like [Nelumbo nucifera]	NA	8.34469	59.8038	35.1443	4.76895	2.54902	11.4349	2.33747	5.23895	1.30069	3.23038e-06	7.83913e-05	yes
gene-GIB67_000822	GIB67_000822	4457	rna-gnl|WGS:JACGCM|KingUnif40988.1	GO:0003677(DNA binding);GO:0003700(DNA binding transcription factor activity);GO:0005634(nucleus);GO:0006351(transcription, DNA-templated);GO:0006355(regulation of transcription, DNA-templated);GO:0046983(protein dimerization activity)	04016(MAPK signaling pathway - plant);04075(Plant hormone signal transduction)	K13422	NA	hypothetical protein AQUCO_01000012v1 [Aquilegia coerulea]	NA	0	0	0	0.095948	0	0.064121	0.384174	3.19194	1.0075	3.25973e-06	7.9013e-05	yes
gene-GIB67_006001	GIB67_006001	24962	rna-gnl|WGS:JACGCM|KingUnif04775.1	GO:0003674(molecular_function);GO:0005634(nucleus);GO:0009734(auxin-activated signaling pathway)	NA	NA	NA	Protein BIG GRAIN 1-like A [Vitis vinifera]	NA	5.70921	99.6117	67.0455	10.3672	3.74825	4.56506	2.67669	9.57137	1.81483	3.29182e-06	7.96996e-05	yes
gene-GIB67_019526	GIB67_019526	16534	rna-gnl|WGS:JACGCM|KingUnif38547.1	GO:0003677(DNA binding);GO:0003700(DNA binding transcription factor activity);GO:0005515(protein binding);GO:0005634(nucleus);GO:0006351(transcription, DNA-templated);GO:0009733(response to auxin);GO:0009751(response to salicylic acid);GO:0042545(cell wall modification);GO:0044212(transcription regulatory region DNA binding);GO:0045787(positive regulation of cell cycle);GO:0045893(positive regula…	NA	NA	NA	PREDICTED: dof zinc finger protein DOF3.4-like [Nelumbo nucifera]	NA	9.14765	18.0232	6.45361	40.0168	11.542	37.6125	3.47425	1.80808	1.88948	3.29678e-06	7.97287e-05	yes
gene-GIB67_036154	GIB67_036154	13539	rna-gnl|WGS:JACGCM|KingUnif34373.1	GO:0000977(RNA polymerase II regulatory region sequence-specific DNA binding);GO:0005794(Golgi apparatus);GO:0005886(plasma membrane);GO:0009833(plant-type primary cell wall biogenesis);GO:0016021(integral component of membrane);GO:0016757(transferase activity, transferring glycosyl groups);GO:0016759(cellulose synthase activity);GO:0016760(cellulose synthase (UDP-forming) activity);GO:0030244(ce…	NA	NA	NA	PREDICTED: cellulose synthase A catalytic subunit 2 [UDP-forming] [Vitis vinifera]	NA	0.038388	0.039083	0.092103	2.10624	0.428886	2.16462	1.27133	0.696916	1.15179	3.31169e-06	7.99978e-05	yes
gene-GIB67_010382	GIB67_010382	25198	rna-gnl|WGS:JACGCM|KingUnif19319.1	GO:0003674(molecular_function);GO:0008150(biological_process);GO:0009507(chloroplast)	NA	NA	NA	Protein of unknown function DUF761 [Macleaya cordata]	NA	2.22864	1.0697	0	6.35164	2.41603	4.28286	54.6391	17.9805	29.9514	3.31562e-06	8.00017e-05	yes
gene-GIB67_021402	GIB67_021402	24486	rna-gnl|WGS:JACGCM|KingUnif03199.1	GO:0005215(transporter activity);GO:0005886(plasma membrane);GO:0006857(oligopeptide transport);GO:0009611(response to wounding);GO:0009753(response to jasmonic acid);GO:0015293(symporter activity);GO:0016021(integral component of membrane);GO:0022857(transmembrane transporter activity);GO:0042128(nitrate assimilation);GO:0055085(transmembrane transport)	NA	NA	NA	Major facilitator superfamily protein isoform 2 [Theobroma cacao]	NA	6.75847	195.683	15.3418	0.418546	0.855705	2.5915	5.76717	20.9142	0.771315	3.33958e-06	8.0406e-05	yes
gene-GIB67_012937	GIB67_012937	11490	rna-gnl|WGS:JACGCM|KingUnif29064.1	GO:0000160(phosphorelay signal transduction system);GO:0005634(nucleus);GO:0005737(cytoplasm);GO:0009736(cytokinin-activated signaling pathway);GO:0009927(histidine phosphotransfer kinase activity);GO:0016310(phosphorylation);GO:0043424(protein histidine kinase binding)	04075(Plant hormone signal transduction)	K14490	NA	Signal transduction histidine kinase [Macleaya cordata]	NA	16.9611	34.6712	16.4892	19.4069	36.4535	45.2617	119.702	134.312	105.812	3.33997e-06	8.0406e-05	yes
gene-GIB67_040187	GIB67_040187	18551	rna-gnl|WGS:JACGCM|KingUnif01996.1	GO:0000786(nucleosome);GO:0003677(DNA binding);GO:0005634(nucleus);GO:0006334(nucleosome assembly);GO:0031492(nucleosomal DNA binding)	NA	NA	NA	Histone H3.2 [Zea mays]	NA	19.8251	2.72697	1.93707	432.128	14.9751	621.609	97.0617	38.4186	11.4771	3.35605e-06	8.07013e-05	yes
gene-GIB67_032802	GIB67_032802	18127	rna-gnl|WGS:JACGCM|KingUnif18276.1	GO:0003674(molecular_function);GO:0008150(biological_process)	NA	NA	NA	PREDICTED: uncharacterized protein LOC104594140 [Nelumbo nucifera]	NA	2.0034	48.7088	73.2536	12.4861	1.57127	8.69349	2.38458	0.910392	0.685538	3.36759e-06	8.08871e-05	yes
gene-GIB67_041901	GIB67_041901	15107	rna-gnl|WGS:JACGCM|KingUnif38481.1	GO:0030599(pectinesterase activity);GO:0046910(pectinesterase inhibitor activity);GO:0071944(cell periphery)	00040(Pentose and glucuronate interconversions)	K01051	EC:3.1.1.11	PREDICTED: pectinesterase [Nelumbo nucifera]	NA	21.6025	2.35199	0.819026	57.1342	128.48	181.018	742.242	221.268	347.483	3.38792e-06	8.12832e-05	yes
gene-GIB67_030023	GIB67_030023	17464	rna-gnl|WGS:JACGCM|KingUnif34452.1	GO:0005886(plasma membrane);GO:0006810(transport);GO:0022857(transmembrane transporter activity)	NA	NA	NA	hypothetical protein AQUCO_01700121v1 [Aquilegia coerulea]	NA	0.746498	0.511459	0.760242	14.6438	2.30357	16.968	14.6237	2.3799	4.22213	3.41021e-06	8.17255e-05	yes
gene-GIB67_008205	GIB67_008205	14820	rna-gnl|WGS:JACGCM|KingUnif38932.1	GO:0003677(DNA binding);GO:0003700(DNA binding transcription factor activity);GO:0005515(protein binding);GO:0005634(nucleus);GO:0005737(cytoplasm);GO:0006351(transcription, DNA-templated);GO:0006355(regulation of transcription, DNA-templated);GO:0009736(cytokinin-activated signaling pathway);GO:0009873(ethylene-activated signaling pathway);GO:0048366(leaf development)	04626(Plant-pathogen interaction)	K13434	NA	PREDICTED: ethylene-responsive transcription factor CRF3 [Nelumbo nucifera]	NA	0.433369	3.46098	1.74044	11.1799	3.40092	16.4538	0.462589	0.683391	0.301386	3.41841e-06	8.18294e-05	yes
gene-GIB67_019619	GIB67_019619	16631	rna-gnl|WGS:JACGCM|KingUnif05666.1	GO:0003680(AT DNA binding);GO:0003700(DNA binding transcription factor activity);GO:0005634(nucleus);GO:0006351(transcription, DNA-templated);GO:0006355(regulation of transcription, DNA-templated)	NA	NA	NA	PREDICTED: AT-hook motif nuclear-localized protein 17-like [Nelumbo nucifera]	NA	10.387	189.656	179.92	152.755	89.0695	80.3747	4.35887	12.148	3.06152	3.42803e-06	8.1967e-05	yes
gene-GIB67_009724	GIB67_009724	37344	rna-gnl|WGS:JACGCM|KingUnif00500.1	GO:0030599(pectinesterase activity);GO:0046910(pectinesterase inhibitor activity);GO:0071944(cell periphery)	00040(Pentose and glucuronate interconversions)	K01051	EC:3.1.1.11	PREDICTED: pectinesterase [Nelumbo nucifera]	NA	20.225	2.15363	0.739914	52.537	118.472	163.167	659.086	203.307	306.938	3.46925e-06	8.28395e-05	yes
gene-GIB67_038253	GIB67_038253	19370	rna-gnl|WGS:JACGCM|KingUnif42774.1	GO:0006855(drug transmembrane transport)	NA	NA	NA	Multi antimicrobial extrusion protein [Cinnamomum micranthum f. kanehirae]	NA	0.47799	0.556047	0.507378	12.2657	1.62871	9.22475	3.19054	1.32395	4.0805	3.47256e-06	8.28395e-05	yes
gene-GIB67_026938	GIB67_026938	3728	rna-gnl|WGS:JACGCM|KingUnif08071.1	GO:0005634(nucleus);GO:0006351(transcription, DNA-templated);GO:0045892(negative regulation of transcription, DNA-templated)	00970(Aminoacyl-tRNA biosynthesis)	K01870	EC:6.1.1.5	PREDICTED: transcription repressor OFP6 [Vitis vinifera]	NA	0	0	0	0.480259	0.691471	2.82599	2.43639	0.39407	0.540393	3.47625e-06	8.28395e-05	yes
gene-GIB67_039769	GIB67_039769	20252	rna-gnl|WGS:JACGCM|KingUnif38190.1	GO:0005794(Golgi apparatus);GO:0006004(fucose metabolic process);GO:0006486(protein glycosylation);GO:0016021(integral component of membrane);GO:0016757(transferase activity, transferring glycosyl groups)	NA	NA	NA	uncharacterized protein LOC113316143 [Papaver somniferum]	NA	0.022322	0.698289	2.62568	0	1.77211	2.75316	0	0	0	3.49361e-06	8.31598e-05	yes
gene-GIB67_025487	GIB67_025487	16	rna-gnl|WGS:JACGCM|KingUnif00603.1	GO:0003677(DNA binding);GO:0003700(DNA binding transcription factor activity);GO:0005515(protein binding);GO:0005634(nucleus);GO:0006351(transcription, DNA-templated);GO:0006355(regulation of transcription, DNA-templated);GO:0009793(embryo development ending in seed dormancy);GO:0009965(leaf morphogenesis);GO:0010150(leaf senescence);GO:0030154(cell differentiation);GO:0045962(positive regulation…	NA	NA	NA	PREDICTED: transcription factor TCP4 [Nelumbo nucifera]	NA	0.341008	3.1299	0.977811	14.5847	0.26105	55.8624	0.392889	1.20885	0.458728	3.5417e-06	8.42098e-05	yes
gene-GIB67_007505	GIB67_007505	30404	rna-gnl|WGS:JACGCM|KingUnif30808.1	GO:0016020(membrane);GO:0016709(oxidoreductase activity, acting on paired donors, with incorporation or reduction of molecular oxygen, NAD(P)H as one donor, and incorporation of one atom of oxygen);GO:0044550(secondary metabolite biosynthetic process)	NA	NA	NA	hypothetical protein AQUCO_01200227v1 [Aquilegia coerulea]	NA	0.07829	0.075653	0	0.44705	1.21189	0.620553	1.764	4.1533	1.79148	3.5682e-06	8.47447e-05	yes
gene-GIB67_004614	GIB67_004614	24378	rna-gnl|WGS:JACGCM|KingUnif38959.1	GO:0005575(cellular_component);GO:0006952(defense response);GO:0016788(hydrolase activity, acting on ester bonds);GO:0019863(IgE binding)	00511(Other glycan degradation)	K01206	EC:3.2.1.51	PREDICTED: esterase-like isoform X1 [Nelumbo nucifera]	NA	43.1106	1.37829	16.7709	2.85114	1.13743	8.65527	0.459932	0.282909	0.989613	3.58964e-06	8.51187e-05	yes
gene-GIB67_021320	GIB67_021320	29707	rna-gnl|WGS:JACGCM|KingUnif39299.1	GO:0005576(extracellular region);GO:0016042(lipid catabolic process);GO:0016298(lipase activity);GO:0052689(carboxylic ester hydrolase activity)	00561(Glycerolipid metabolism)	K00679	EC:2.3.1.158	GDSL esterase/lipase At5g03820-like [Quercus suber]	NA	0.499756	0.053424	0.254901	0.229354	0.336023	0.429408	1.29679	15.5416	1.73793	3.59409e-06	8.51187e-05	yes
gene-GIB67_029500	GIB67_029500	5161	rna-gnl|WGS:JACGCM|KingUnif19660.1	GO:0005215(transporter activity);GO:0016021(integral component of membrane);GO:0055085(transmembrane transport)	NA	NA	NA	hypothetical protein AQUCO_07200162v1 [Aquilegia coerulea]	NA	3.94203	39.812	44.4965	3.43683	3.00556	5.89604	3.26897	5.44057	2.51852	3.596e-06	8.51187e-05	yes
gene-GIB67_027530	GIB67_027530	23725	rna-gnl|WGS:JACGCM|KingUnif11129.1	GO:0006629(lipid metabolic process);GO:0006633(fatty acid biosynthetic process);GO:0006636(unsaturated fatty acid biosynthetic process);GO:0009266(response to temperature stimulus);GO:0009507(chloroplast);GO:0009941(chloroplast envelope);GO:0016021(integral component of membrane);GO:0016717(oxidoreductase activity, acting on paired donors, with oxidation of a pair of donors resulting in the reduc…	NA	NA	NA	Fatty acid desaturase [Macleaya cordata]	NA	17.2796	176.711	280.188	89.7726	135.868	137.432	3.82615	11.7171	8.1079	3.60672e-06	8.52771e-05	yes
gene-GIB67_031040	GIB67_031040	10950	rna-gnl|WGS:JACGCM|KingUnif00700.1	GO:0005634(nucleus);GO:0005829(cytosol);GO:0009691(cytokinin biosynthetic process);GO:0016799(hydrolase activity, hydrolyzing N-glycosyl compounds)	NA	NA	NA	Cytokinin riboside 5'-monophosphate phosphoribohydrolase LOG [Macleaya cordata]	NA	1.36867	0.682175	0.092325	19.8602	2.57546	20.4491	0.961917	1.71146	0.173908	3.62272e-06	8.55601e-05	yes
gene-GIB67_038489	GIB67_038489	8142	rna-gnl|WGS:JACGCM|KingUnif04947.1	GO:0005886(plasma membrane);GO:0007165(signal transduction)	NA	NA	NA	Leucine-rich repeat [Macleaya cordata]	NA	0	0	0	1.10536	0	4.59439	0	0	0.04318	3.6631e-06	8.64174e-05	yes
gene-GIB67_018090	GIB67_018090	5699	rna-gnl|WGS:JACGCM|KingUnif37388.1	GO:0003824(catalytic activity);GO:0009809(lignin biosynthetic process);GO:0016621(cinnamoyl-CoA reductase activity);GO:0050662(coenzyme binding)	00940(Phenylpropanoid biosynthesis)	K09753	EC:1.2.1.44	cinnamoyl-CoA reductase 1-like [Papaver somniferum]	NA	5.67895	0	56.6494	0.118334	0	0.237221	0.344177	0.714638	0.219034	3.67862e-06	8.65954e-05	yes
gene-GIB67_007424	GIB67_007424	21432	rna-gnl|WGS:JACGCM|KingUnif06365.1	GO:0003674(molecular_function);GO:0005634(nucleus);GO:0008150(biological_process)	NA	NA	NA	PREDICTED: uncharacterized protein LOC104595798 isoform X1 [Nelumbo nucifera]	NA	0	0	0	1.8831	0	3.27602	0	0.071366	0.073199	3.68243e-06	8.65954e-05	yes
gene-GIB67_015314	GIB67_015314	41587	rna-gnl|WGS:JACGCM|KingUnif22589.1	GO:0051213(dioxygenase activity)	NA	NA	NA	2-oxoglutarate and Fe(II)-dependent oxygenase superfamily protein, putative [Theobroma cacao]	NA	0.400718	0	0.222593	0.563616	0.380895	1.35471	5.58266	15.7222	3.20568	3.68291e-06	8.65954e-05	yes
gene-GIB67_014674	GIB67_014674	29615	rna-gnl|WGS:JACGCM|KingUnif29169.1	GO:0005794(Golgi apparatus);GO:0008150(biological_process);GO:0016757(transferase activity, transferring glycosyl groups)	NA	NA	NA	hypothetical protein AQUCO_02100185v1 [Aquilegia coerulea]	NA	0.020506	0	0	0.165147	0.120928	0.852036	1.25597	2.29107	0.685084	3.68741e-06	8.6605e-05	yes
gene-GIB67_041337	GIB67_041337	10153	rna-gnl|WGS:JACGCM|KingUnif42382.1	GO:0008194(UDP-glycosyltransferase activity);GO:0009813(flavonoid biosynthetic process);GO:0043231(intracellular membrane-bounded organelle);GO:0052696(flavonoid glucuronidation)	00908(Zeatin biosynthesis)	K13495	EC:2.4.1.215	UDP-glucuronosyl/UDP-glucosyltransferase [Macleaya cordata]	NA	1.12289	9.42319	8.58507	65.8844	34.8387	23.7166	46.1214	140.182	71.7937	3.70355e-06	8.68877e-05	yes
[truncated: 29,762 more rows]
